# Supplementary material for: Trimethylguanosine cap-fluorescent molecular rotor (TMG–FMR) conjugates are potent, specific snurportin1 ligands enabling visualization in living cells
Source: Royal Society of Chemistry journal article supplement (doi:10.1039/d4ob01019a), 2024-01-01

## **Trimethylguanosine Cap-Fluorescent Molecular Rotor conjugates (TMG-FMR) are potent, specific snurportin1 ligands enabling visualization in living cells**

Piotr Surynt<sup>a, b</sup>, Blazej A. Wojtczak<sup>b</sup>, Mikolaj Chrominski<sup>b</sup>, Joanna Panecka-Hofman<sup>b</sup>, Karina Kwapiszewska<sup>c</sup>, Tomasz Kalwarczyk<sup>c</sup>, Dorota Kubacka<sup>a</sup>, Tomasz Spiewla<sup>a</sup>, Renata Kasprzyk<sup>b</sup>, Robert Holyst<sup>c</sup>, Joanna Kowalska<sup>a</sup>, Jacek Jemielity<sup>\*,b</sup>

<sup>a</sup> Division of Biophysics, Faculty of Physics, University of Warsaw, Pasteura 5, 02-093, Warsaw, Poland

<sup>b</sup> Centre of New Technologies, University of Warsaw, Banacha 2c, 02-097, Warsaw, Poland

<sup>c</sup> Institute of Physical Chemistry, Polish Academy of Sciences, Kasprzaka 44/52, 01-224, Warsaw, Poland

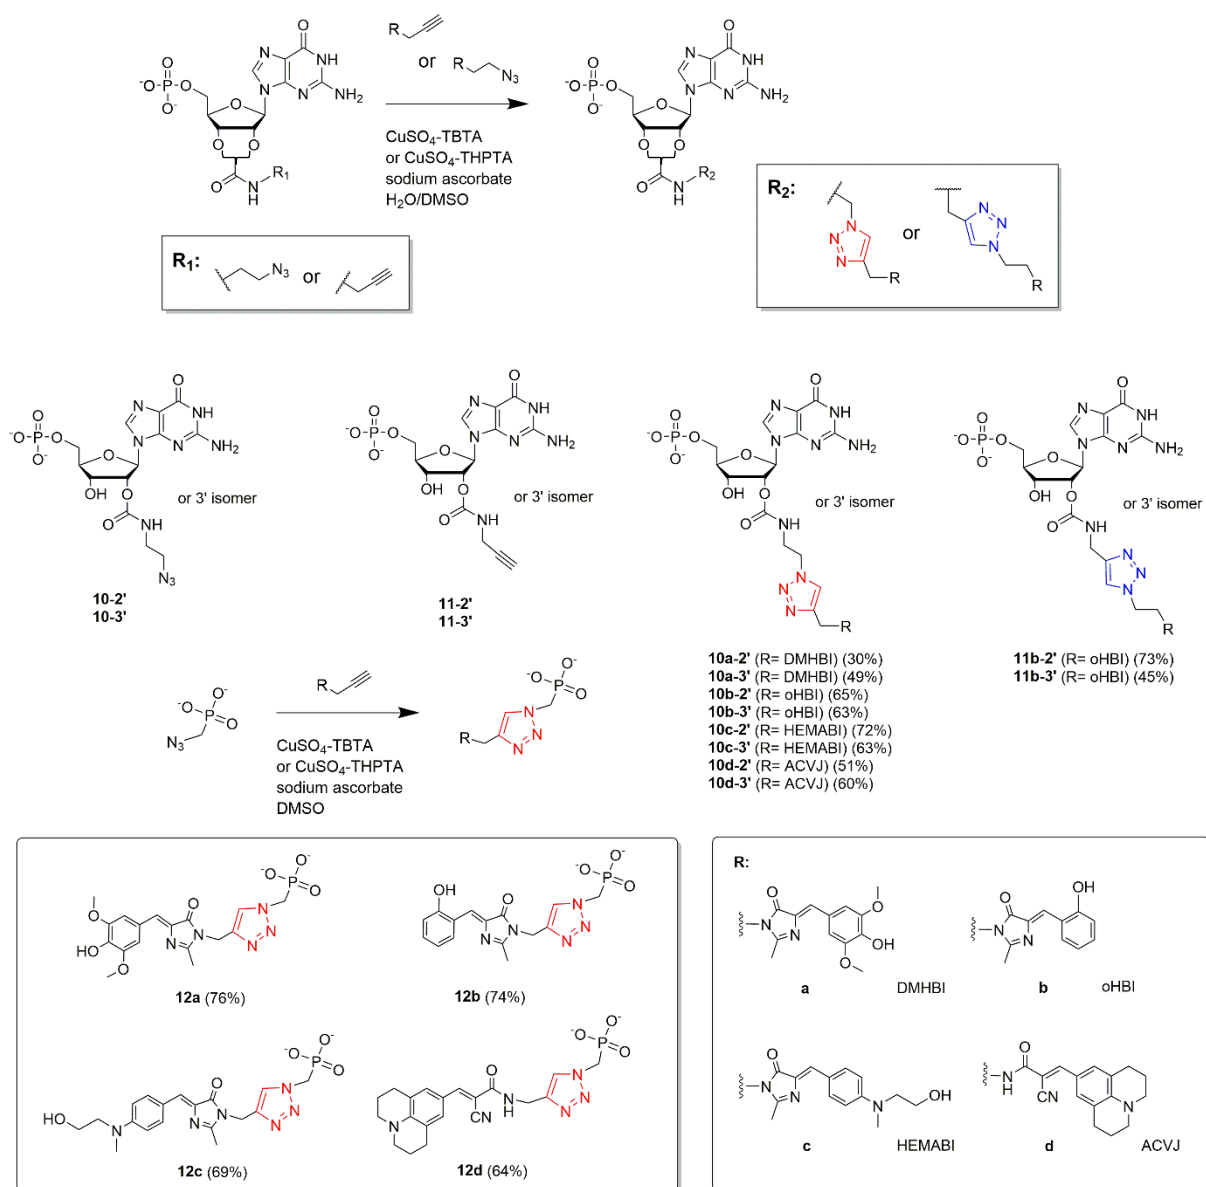

**Scheme S1.** General CuAAC schemes and structures of different obtained GMP with linkers (azide/alkyne group) and conjugates with FMR

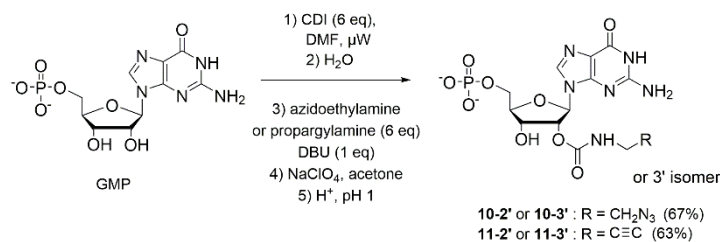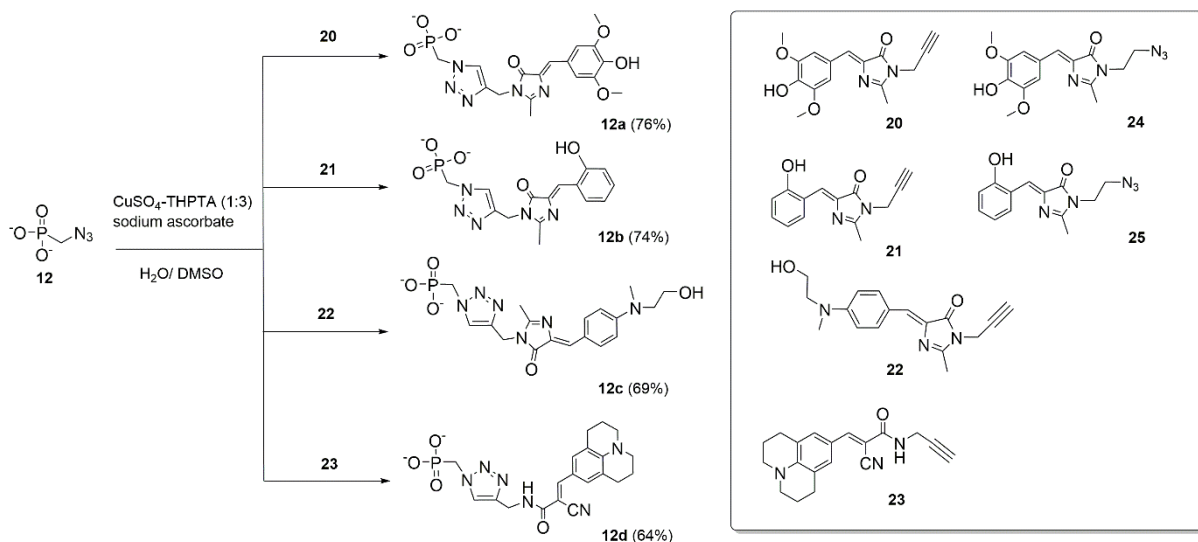

**Scheme S2.** Synthesis of functionalized GMP CuAAC reagents **10-** and **11-2'/3'** and FMR conjugates **12a-d**. Compounds **20-25** are FMR derivatives, CuAAC reagents

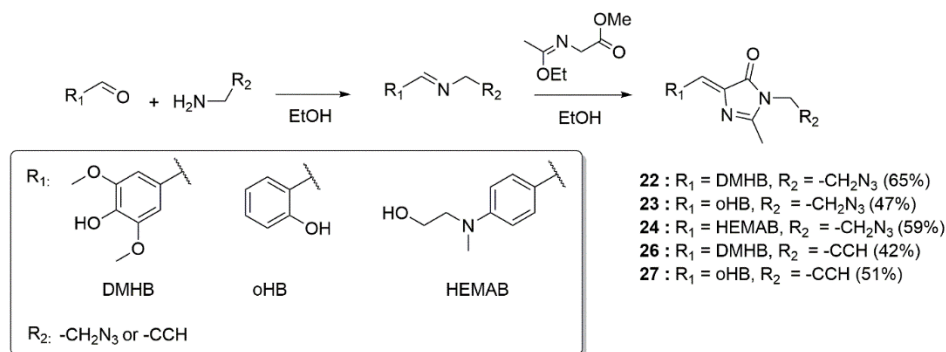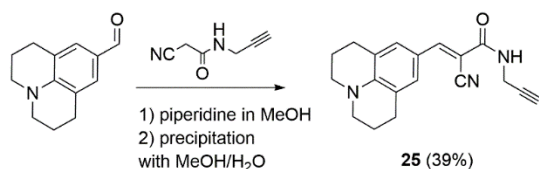

**Scheme S3.** Synthesis of FMR derivatives **20-25**

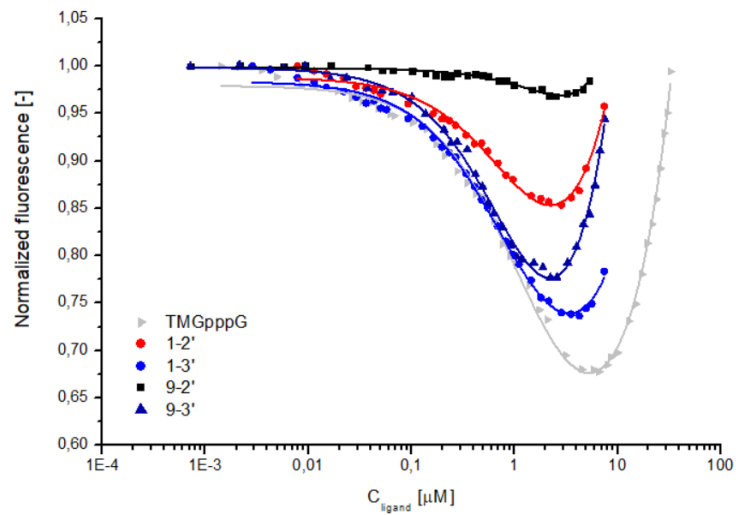

**Figure S1.** Exemplary FQT curves for TMG cap with linkers either from G or TMG side.

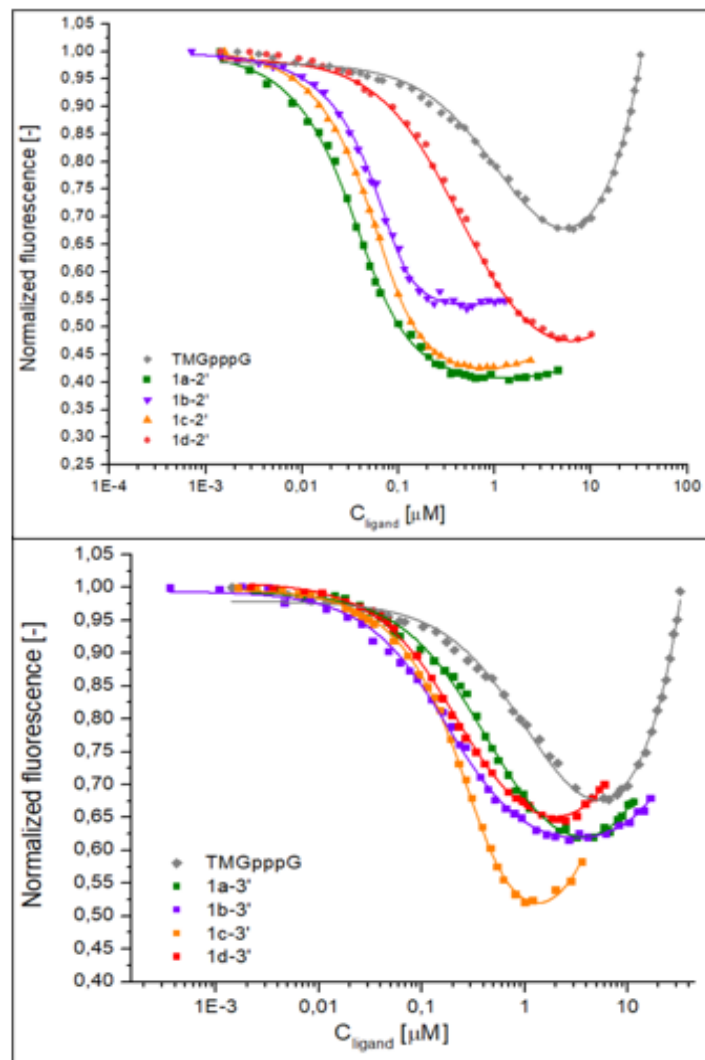

**Figure S2.** Exemplary FQT curves for complexes of snurportin1 and 2'-O- (top) or 3'-O-substituted (bottom) TMGpppG conjugates with different FMRs, TMGpppG (gray) was a standard.

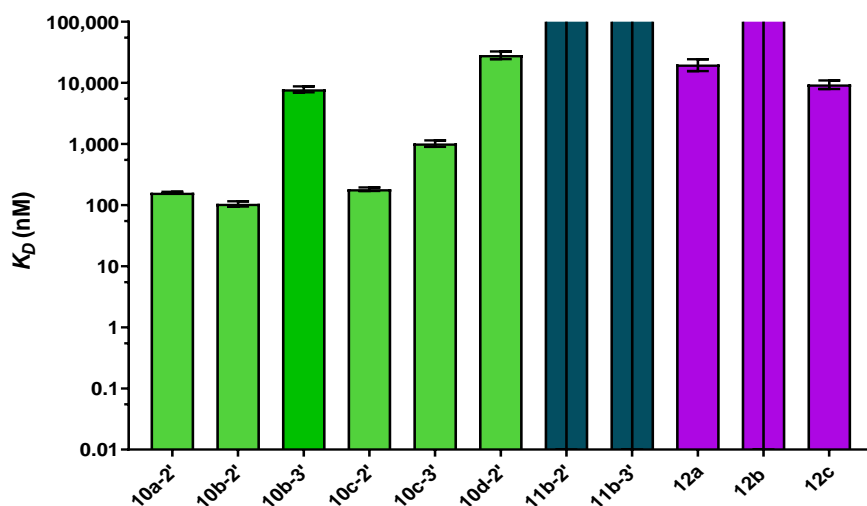

**Figure S3.** Dissociation constants ( $K_D$ ) for complexes of snurportin1 and different GMP-FMR conjugates (**10**, **11**) and FMR-CH<sub>2</sub>-triazole-CH<sub>2</sub>-phosphonates (**12**, **a-c**)

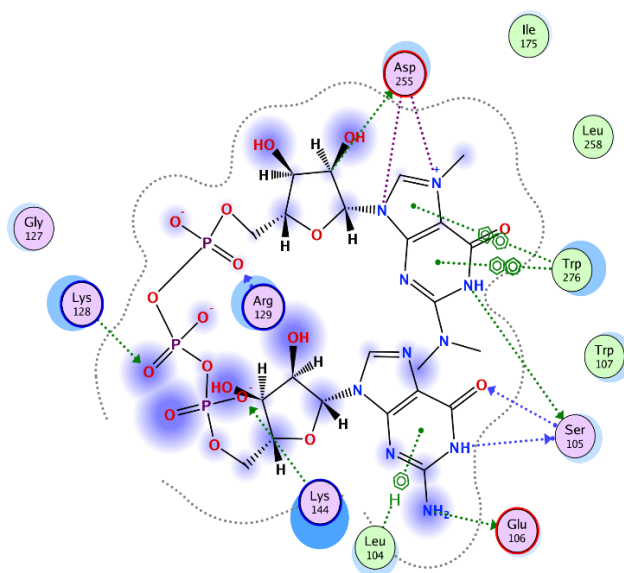

**Figure S4:** Interaction diagram for the unsubstituted TMGpppG in the snurportin1 binding site with exclusion of water-mediated interactions.

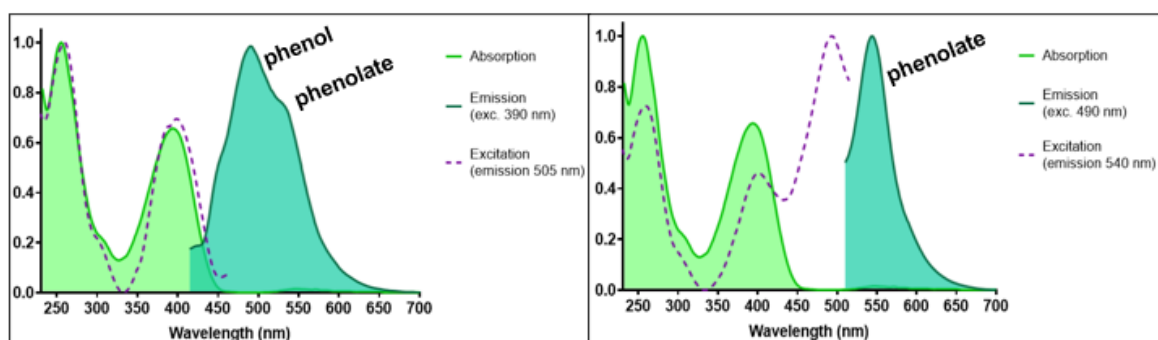

**Figure S5.** Dual emission for unbound **1a-2'** originating from phenol and phenolate DMHBI forms excited at A. 390 nm, B. 490 nm.

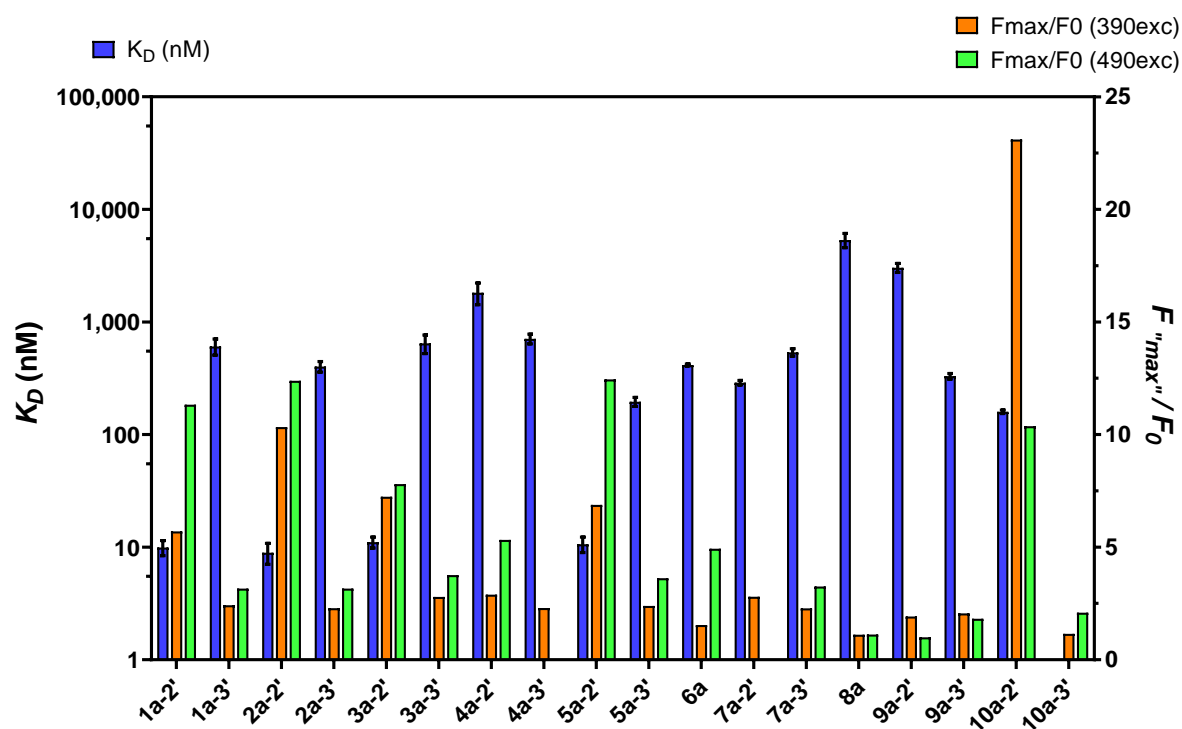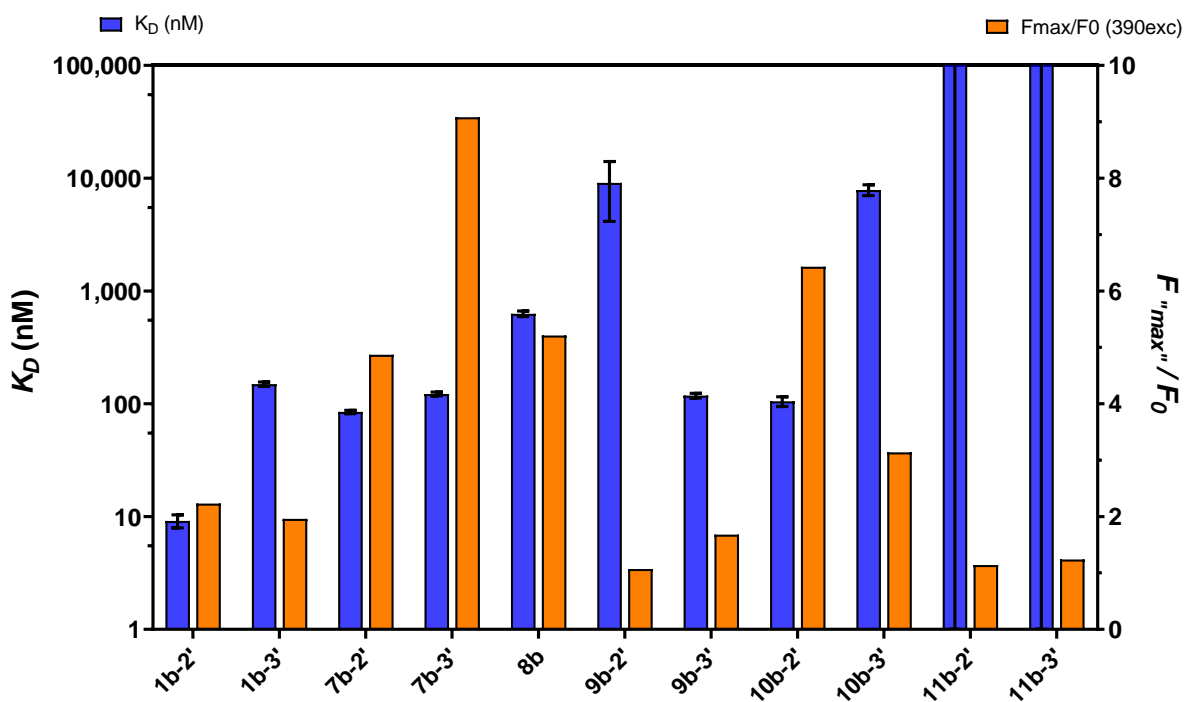

**Figure S6.** Comparison of dissociation constants and probes responses ( $F_{max}/F_0$ ) for all A. DMHBI conjugates, B. oHBI conjugates

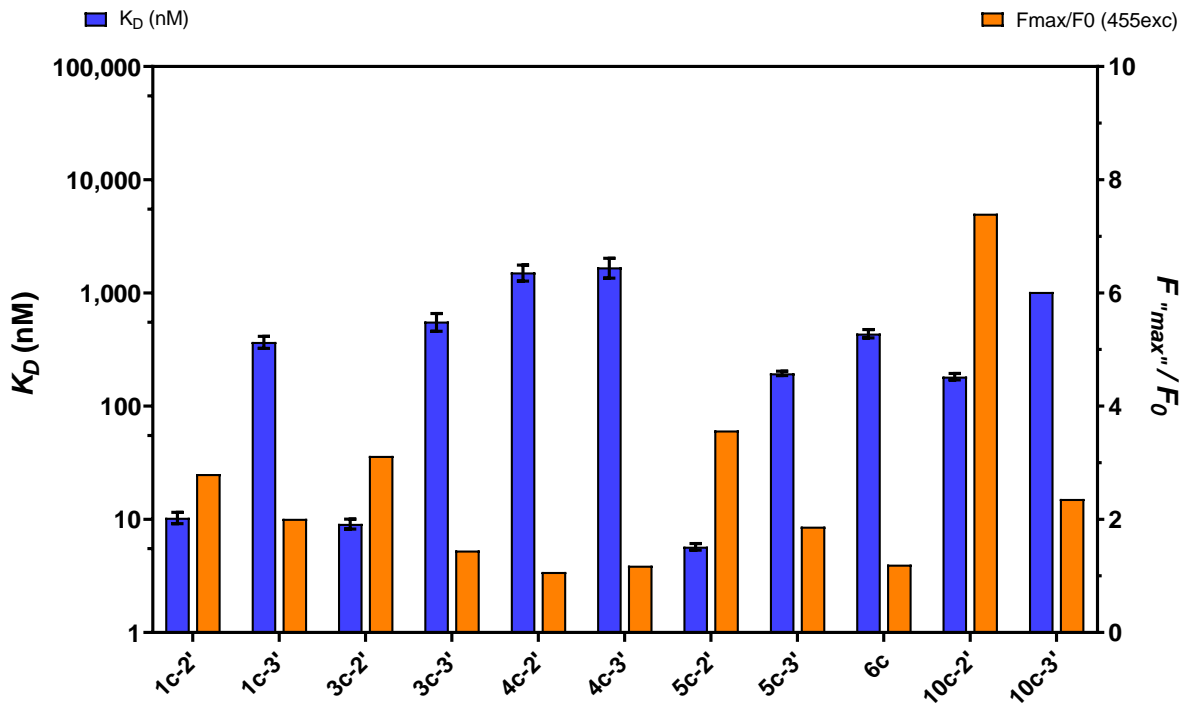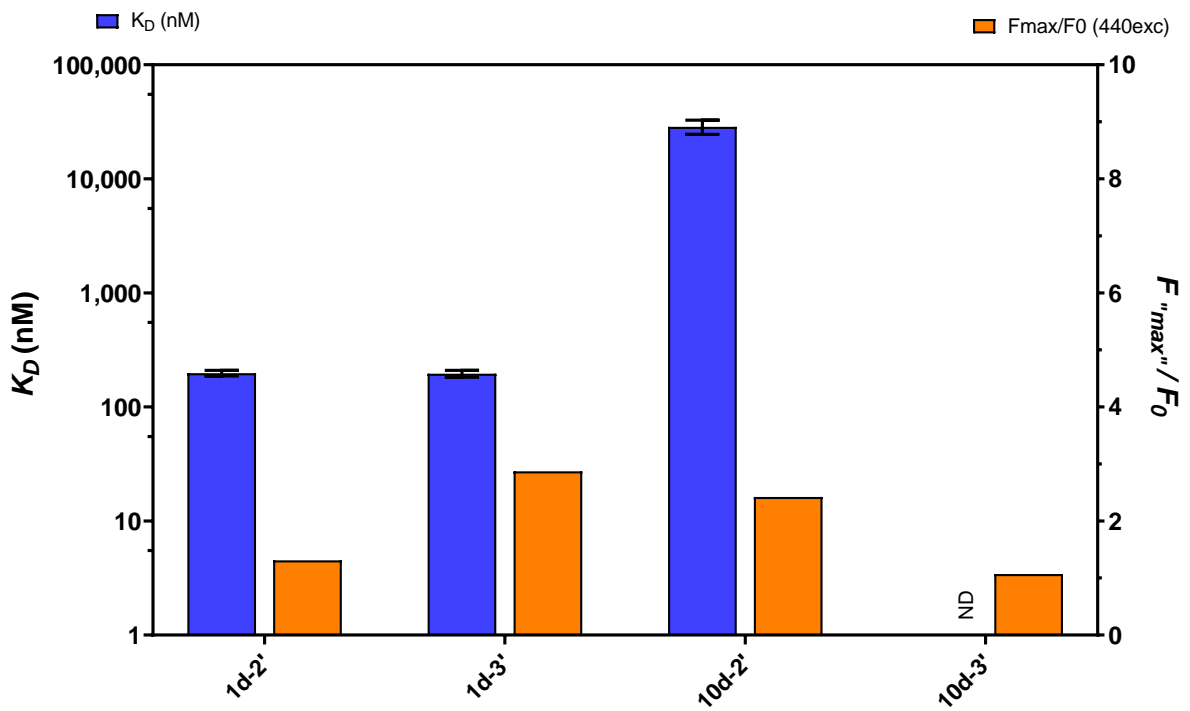

**Figure S7.** Comparison of dissociation constants and probes responses ( $F_{max}/F_0$ ) for all A. HEMABI conjugates, B. ACVJ conjugates

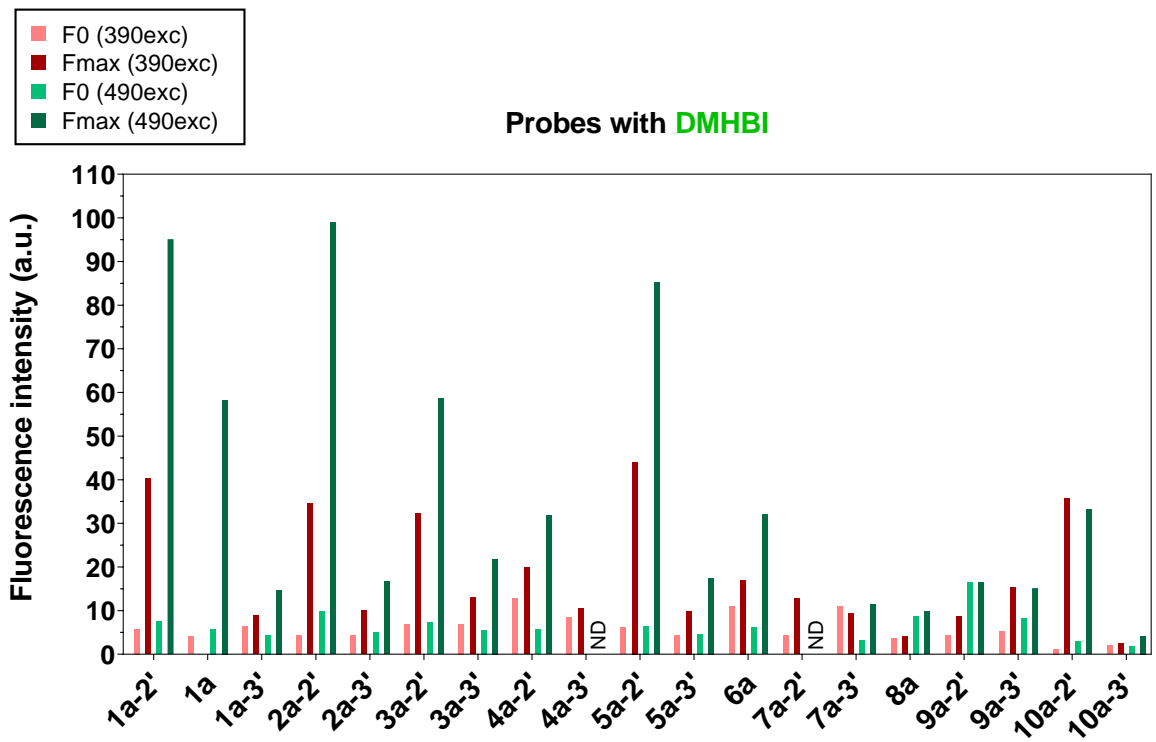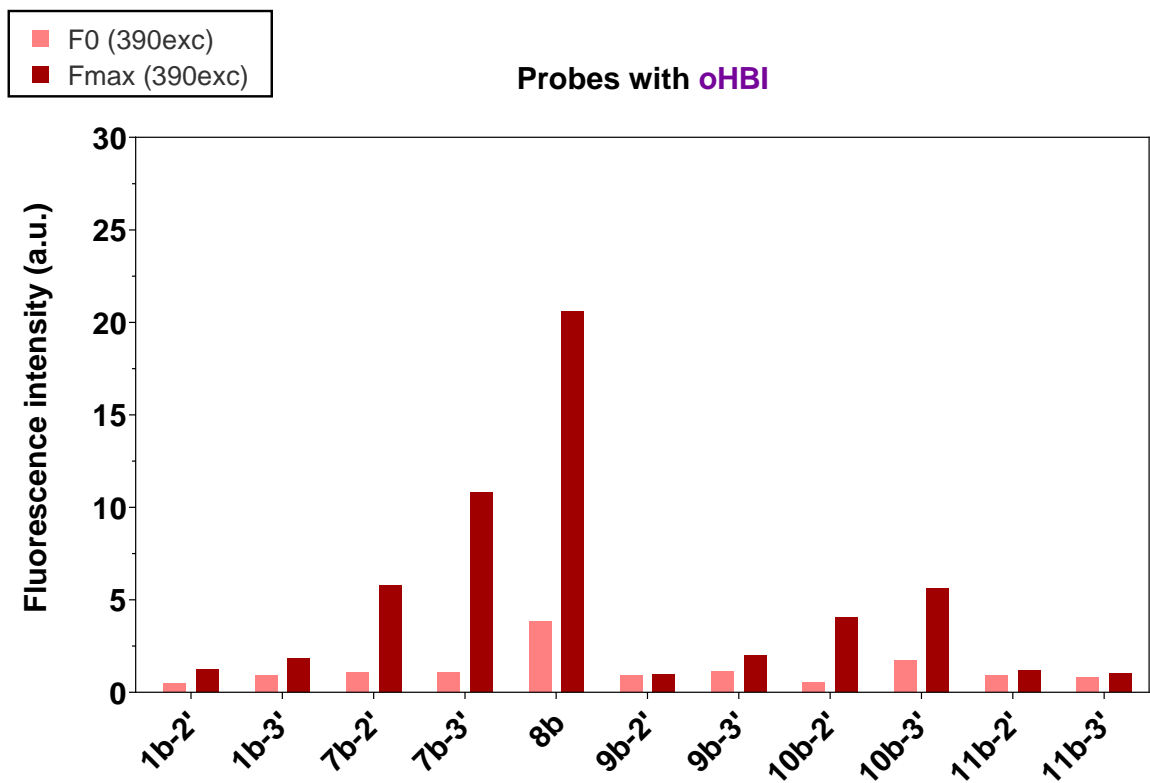

**Figure S8.** Initial (F0) and partly or fully saturated with snurportin1 (Fmax) normalized to concentration fluorescence intensities, A. DMHBI conjugates| B. oHBI conjugates



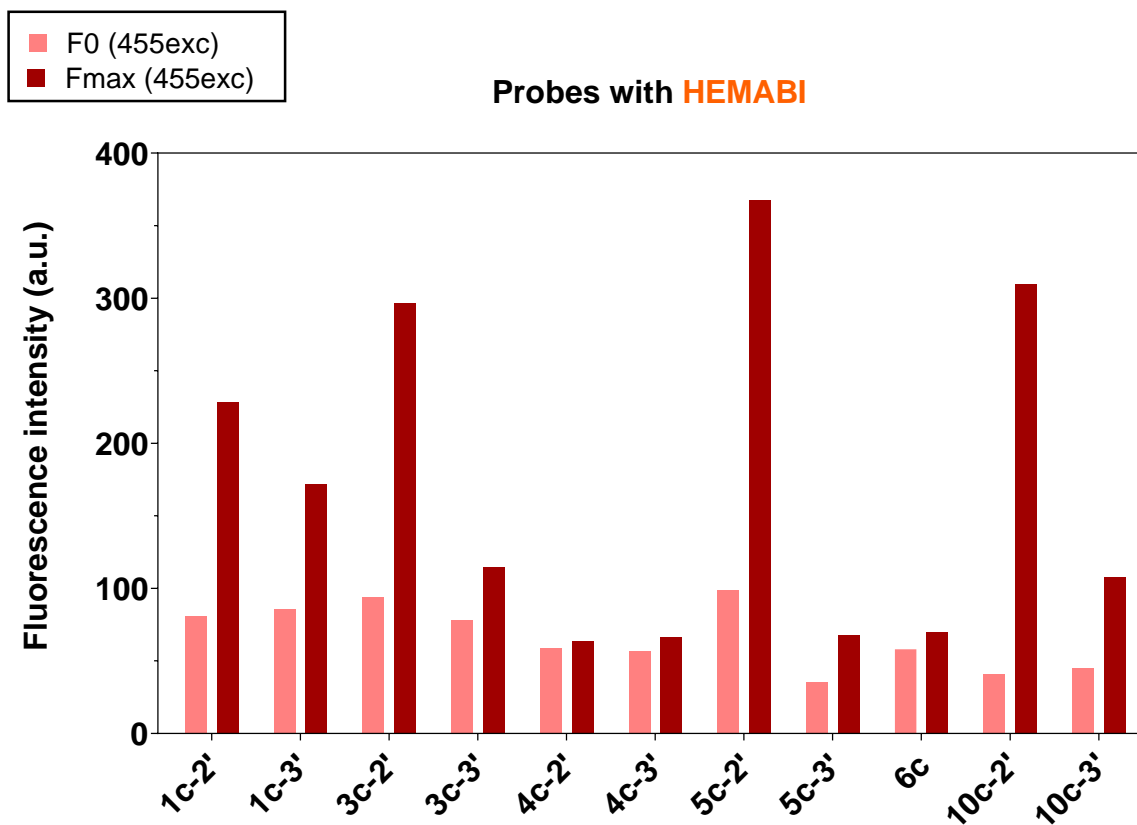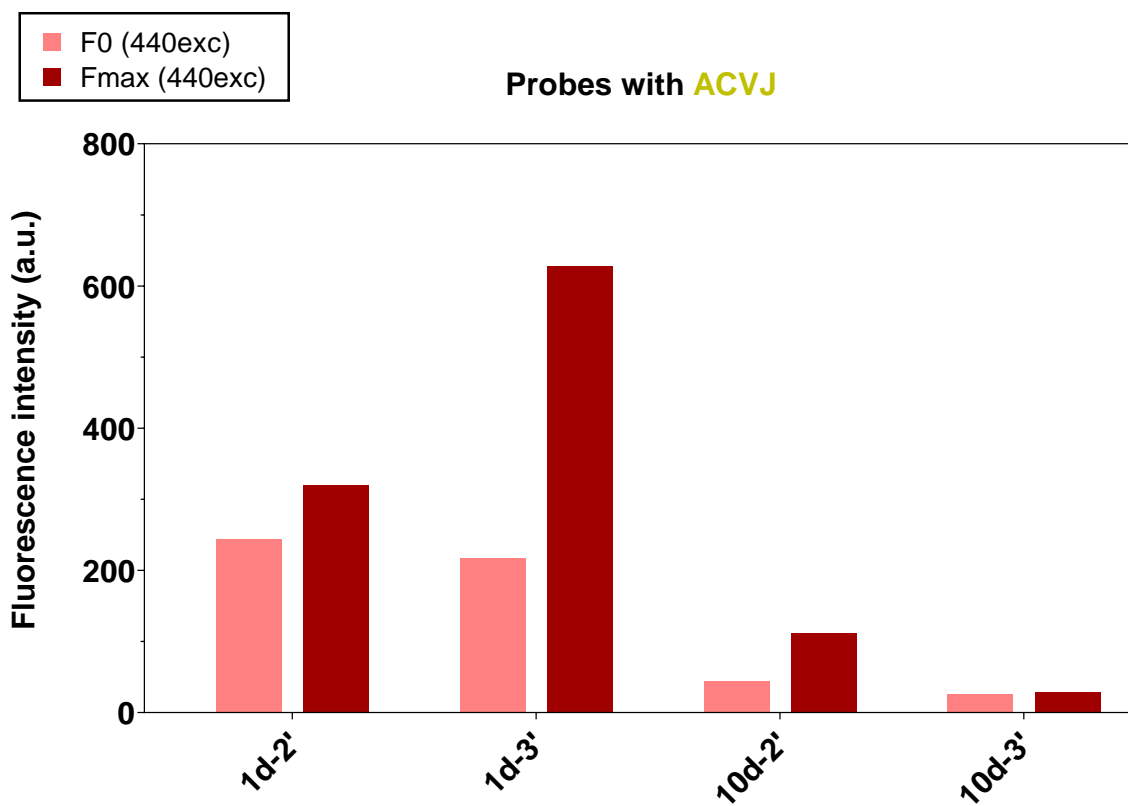

**Figure S9.** Initial (F0) and partly or fully saturated with snurportin1 (Fmax) normalized to concentration fluorescence intensities. A. HEMABI conjugates. B. ACVJ conjugates

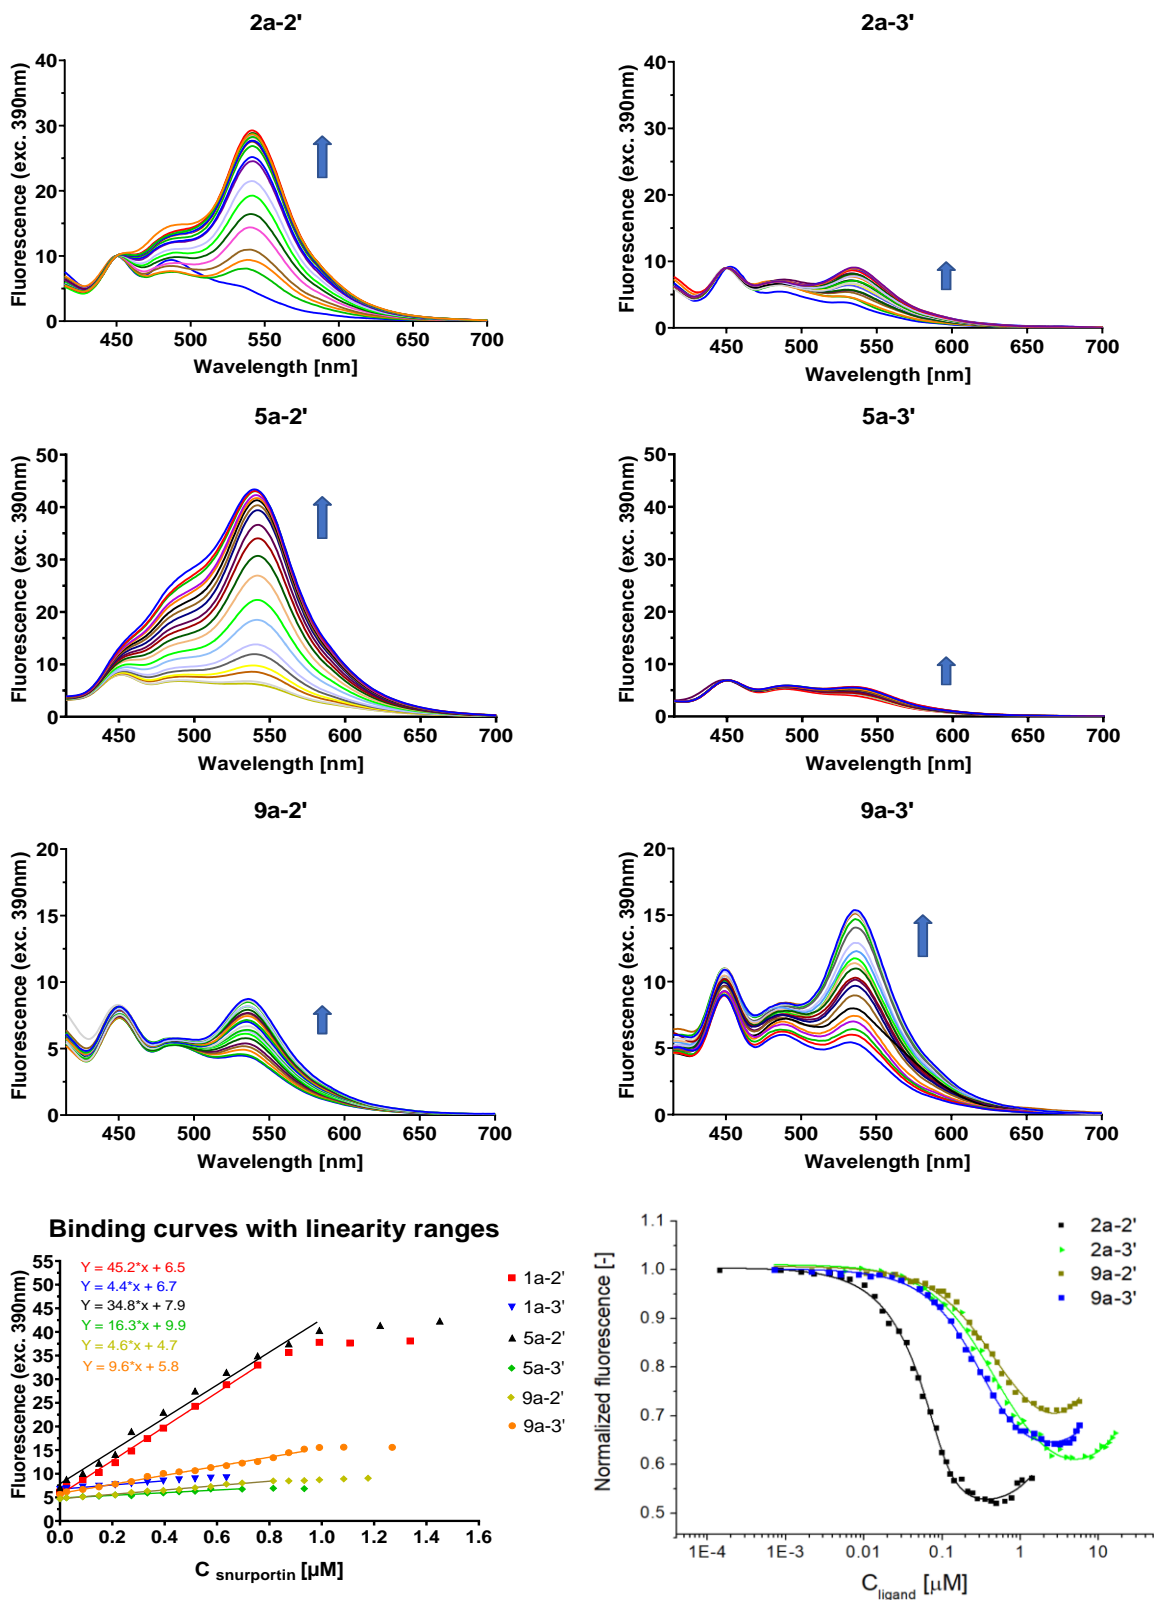

**Figure S10.** Representative merged emission spectra (excited at 390 nm) for DMHBI conjugates titrated with snurportin, binding curves for ligands titrations with snurportin and FQT curves (titrations with ligand)

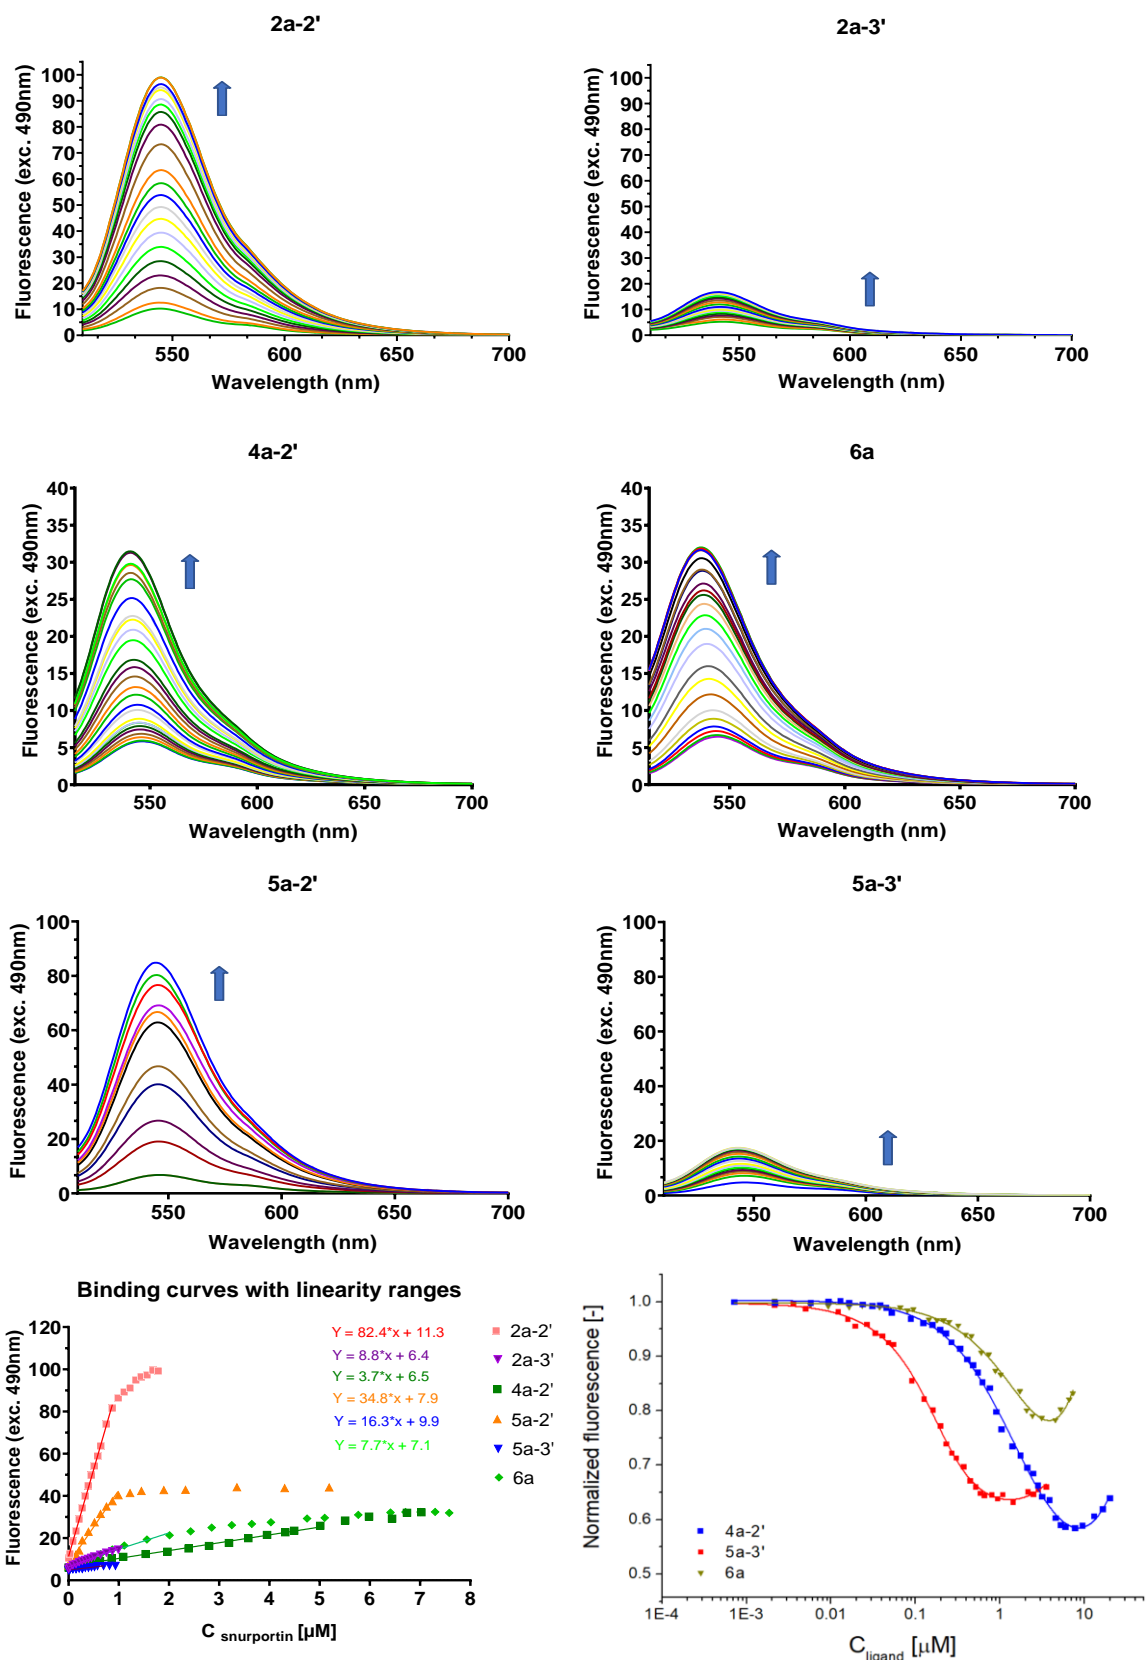

**Figure S11.** Representative merged emission spectra (excited at 490 nm) for DMHBI conjugates titrated with snurportin, binding curves for titrations with snurportin and FQT curves (titrations with ligand)

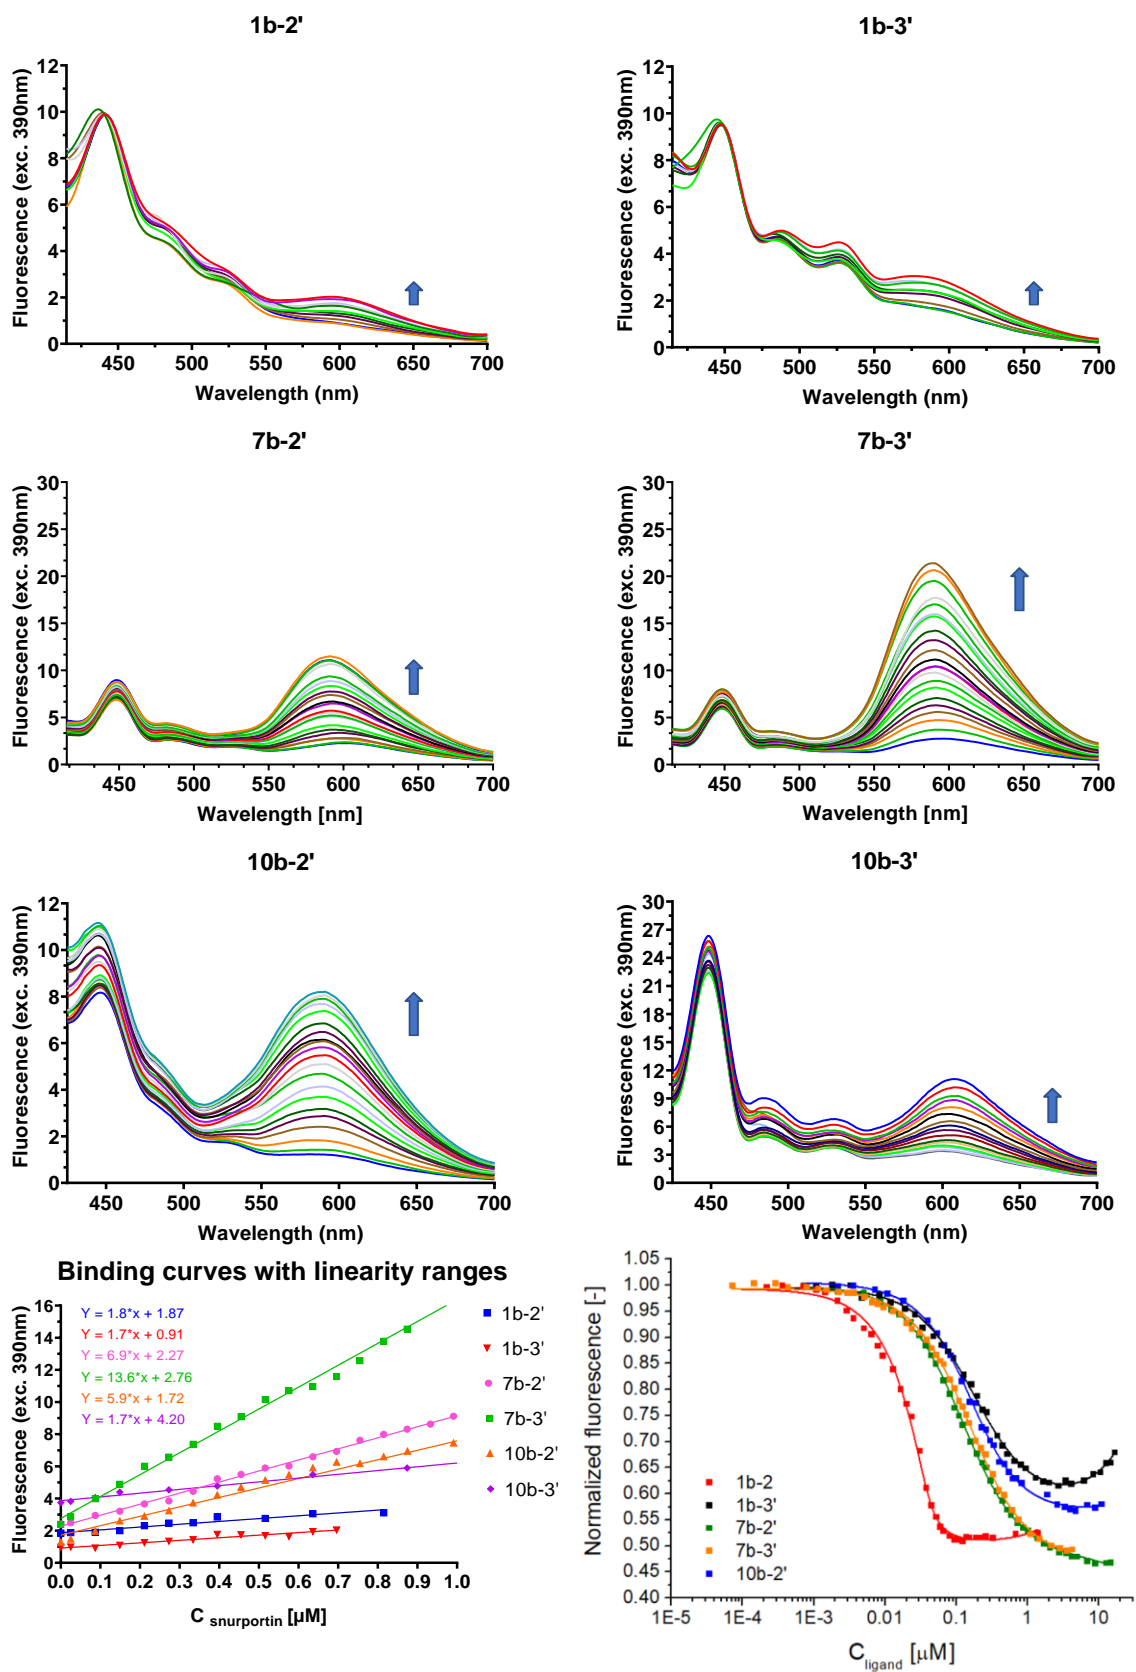

**Figure S12.** Representative merged emission spectra for oHBI conjugates titrated with snurportin, binding curves for ligands titrations with snurportin and FQT curves (titrations with ligand)

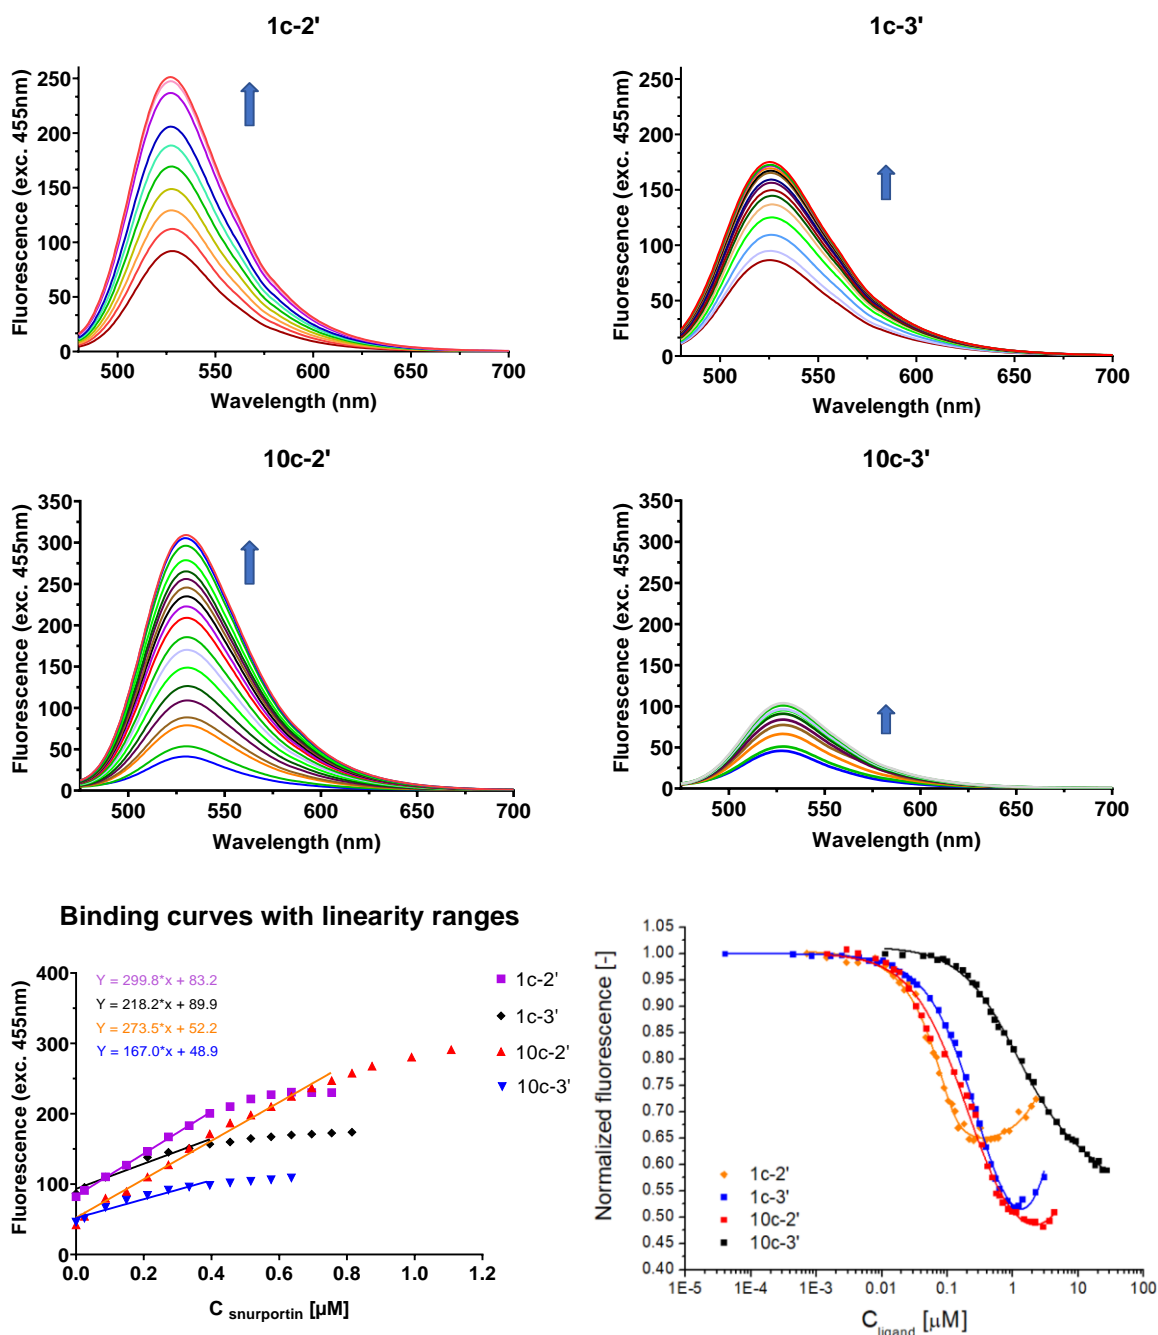

**Figure S13.** Representative merged emission spectra for HEMABI conjugates titrated with snurportin, binding curves for ligands titrations with snurportin and FQT curves (titrations with ligand)

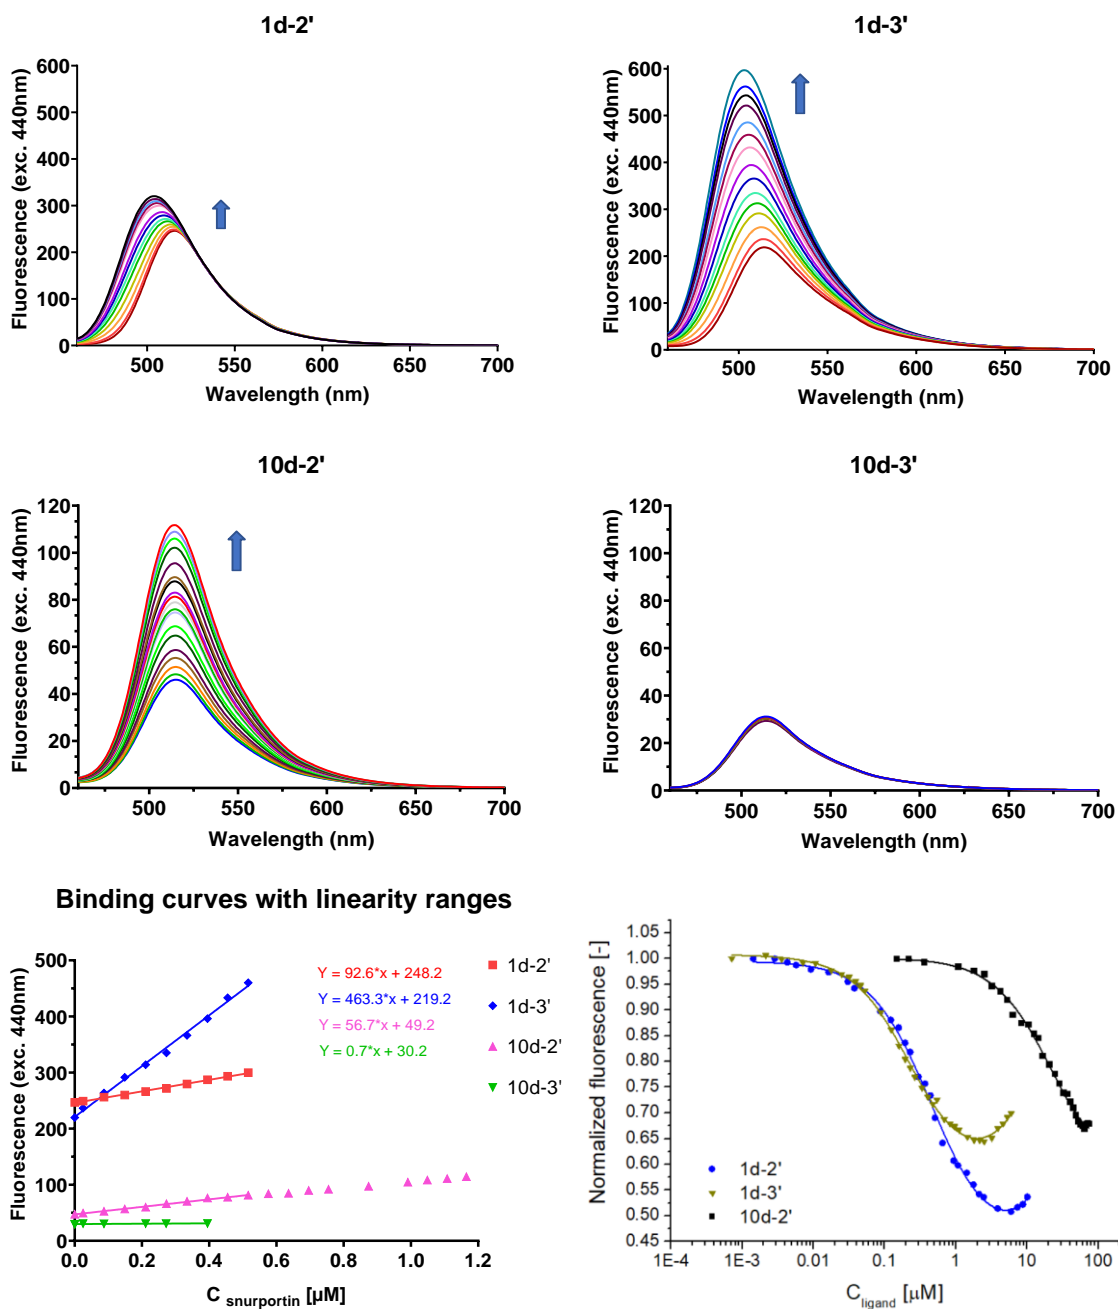

**Figure S14.** Merged emission spectra for all tested ACVJ conjugates titrated with snurportin binding curves for ligands titrations with snurportin and FQT curves.

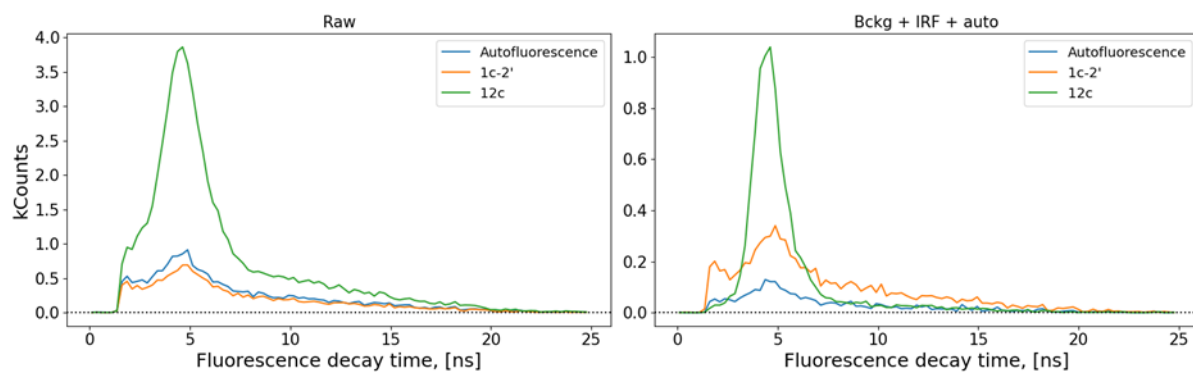

**Figure S15.** The histograms of the fluorescence lifetimes extracted from the FLIM images depicted in Figure 9.

**Table S1.** Spectral properties of Fluorescent Molecular Rotors monophosphates derivatives

| FMR derivative                                                             | $\lambda_{\text{abs}}^{\text{a}}$ | $\lambda_{\text{em}}^{\text{b}}$ | Stokes Shift (nm) |
|----------------------------------------------------------------------------|-----------------------------------|----------------------------------|-------------------|
| DMHBI-CH <sub>2</sub> -triazole-CH <sub>2</sub> -phosphate ( <b>12a</b> )  | 390 / 490                         | 490 / 525                        | 100 / 35          |
| oHBI-CH <sub>2</sub> -triazole-CH <sub>2</sub> -phosphate ( <b>12b</b> )   | 390                               | 605                              | 215               |
| HEMABI-CH <sub>2</sub> -triazole-CH <sub>2</sub> -phosphate ( <b>12c</b> ) | 455                               | 535                              | 80                |
| ACVJ-CH <sub>2</sub> -triazole-CH <sub>2</sub> -phosphate ( <b>12d</b> )   | 465                               | 535                              | 70                |

<sup>a</sup> – in KH<sub>2</sub>PO<sub>4</sub> buffer pH 7 ; <sup>b</sup> – in HEPES buffer pH 7.2

**Table S2.** Determined K<sub>D</sub> for different TMG capped ligands and non TMG-cap-FMR conjugates with snurportin1 based on FQT experiments and fluorescence enhancement values (F<sub>m</sub>/F<sub>0</sub>) based on saturation experiments paired with maximum emission wavelengths

| Compound                | K <sub>D</sub> (nM)     | Compound      | K <sub>D</sub> (nM) | F <sub>m</sub> /F <sub>0</sub> ( $\lambda_{\text{exc}1}$ ) | $\lambda_{\text{em}1}$ for F <sub>m</sub> (nm) | F <sub>m</sub> /F <sub>0</sub> ( $\lambda_{\text{exc}2}$ ) | $\lambda_{\text{em}2}$ for F <sub>m</sub> (nm) |
|-------------------------|-------------------------|---------------|---------------------|------------------------------------------------------------|------------------------------------------------|------------------------------------------------------------|------------------------------------------------|
| TMGpppG                 | 1111 ± 74               | <b>10a-2'</b> | 159.3 ± 5.6         | 23.1                                                       | 549                                            | 10.4                                                       | 545                                            |
| TMGppCH <sub>2</sub> pG | 1316 ± 17 <sup>a</sup>  | <b>10a-3'</b> | NA                  | 1.2                                                        | 531                                            | 2.1                                                        | 548                                            |
| TMGpCH <sub>2</sub> ppG | 2564 ± 656 <sup>a</sup> | <b>10b-2'</b> | 105 ± 11            | 6.4                                                        | 583                                            | -                                                          | -                                              |
| TMGpppA                 | 5263 ± 277 <sup>a</sup> | <b>10b-3'</b> | >10000              | 3.1                                                        | 609                                            | -                                                          | -                                              |
| TMGppppG                | 417 ± 6.9 <sup>a</sup>  | <b>10c-2'</b> | 182 ± 12            | 7.4                                                        | 531                                            | -                                                          | -                                              |
| <b>1-2'</b>             | 1113 ± 77               | <b>10c-3'</b> | 1007 ± 46           | 2.4                                                        | 527                                            | -                                                          | -                                              |
| <b>1-3'</b>             | 876 ± 73                | <b>10d-2'</b> | >20000              | 2.4                                                        | 514                                            | -                                                          | -                                              |
| <b>2-2'</b>             | 148 ± 12                | <b>10d-3'</b> | ND                  | 1.1                                                        | 512                                            | -                                                          | -                                              |
| <b>2-3'</b>             | 257 ± 21                | <b>11b-2'</b> | >10000              | 1.1                                                        | 585                                            | -                                                          | -                                              |
| <b>3-2'</b>             | 681 ± 32                | <b>11b-3'</b> | >10000              | 1.2                                                        | 586                                            | -                                                          | -                                              |
| <b>3-3'</b>             | 780 ± 138               | <b>12a</b>    | >10000              | ND                                                         | ND                                             | ND                                                         | ND                                             |
| <b>4-2'</b>             | 1287 ± 232              | <b>12b</b>    | >10000              | ND                                                         | ND                                             | -                                                          | -                                              |
| <b>4-3'</b>             | 5882 ± 3806             | <b>12c</b>    | 9434 ± 1513         | 1.0                                                        | 525                                            | -                                                          | -                                              |
| <b>5-2'</b>             | 154 ± 5.6               | <b>12d</b>    | ND                  | ND                                                         | ND                                             | -                                                          | -                                              |
| <b>5-3'</b>             | 272 ± 18                |               |                     |                                                            |                                                |                                                            |                                                |
| <b>6-2'</b>             | 155 ± 23                |               |                     |                                                            |                                                |                                                            |                                                |
| <b>6-3'</b>             | 343 ± 20                |               |                     |                                                            |                                                |                                                            |                                                |
| <b>7-2'</b>             | 548 ± 129               |               |                     |                                                            |                                                |                                                            |                                                |
| <b>7-3'</b>             | 609 ± 19                |               |                     |                                                            |                                                |                                                            |                                                |
| <b>8</b>                | No binding              |               |                     |                                                            |                                                |                                                            |                                                |
| <b>9-2'</b>             | >10000                  |               |                     |                                                            |                                                |                                                            |                                                |
| <b>9-3'</b>             | 893 ± 167               |               |                     |                                                            |                                                |                                                            |                                                |

<sup>a</sup> M. Waszczuk, Ph.D Thesis, 2017

NA – not applicable, ND – not determined



**Table S3.** Top 10 poses of 2'-o-HBI in **1b-2'** and 3'-o-HBI in **1b-3'** ranked by docking score, and ligand strain energies (E\_strain).

| 2'-o-HBI ( <b>1b-2'</b> ) |                          |                     | 3'-o-HBI ( <b>1b-3'</b> ) |                          |                     |
|---------------------------|--------------------------|---------------------|---------------------------|--------------------------|---------------------|
| pose no.                  | docking score [kcal/mol] | E_strain [kcal/mol] | pose no.                  | docking score [kcal/mol] | E_strain [kcal/mol] |
| 1                         | -4.39                    | 11.07               | 1                         | -4.11                    | 15.38               |
| 2                         | -4.39                    | 9.14                | 2                         | -3.88                    | 17.32               |
| 3                         | -4.07                    | 21.21               | 3                         | -3.88                    | 10.37               |
| 4                         | -4.05                    | 10.28               | 4                         | -3.87                    | 15.93               |
| 5                         | -4.04                    | 20.61               | 5                         | -3.83                    | 11.73               |
| 6                         | -3.99                    | 11.13               | 6                         | -3.82                    | 13.55               |
| 7                         | -3.98                    | 15.31               | 7                         | -3.8                     | 7.07                |
| 8                         | -3.93                    | 11.68               | 8                         | -3.78                    | 14.33               |
| 9                         | -3.84                    | 11.93               | 9                         | -3.77                    | 13.22               |
| 10                        | -3.62                    | 23.05               | 10                        | -3.71                    | 14.14               |

#### **DMHBI-methyl-1H-1,2,3-triazol-1-yl)methyl monophosphonate (12a)**

Obtained according to GP C starting from 300  $\mu$ L (8.16 mg, 60  $\mu$ mol) of **12** (200 mM H<sub>2</sub>O solution), 300  $\mu$ L (9.00 mg, 30  $\mu$ mol) of **20** (100 mM DMSO solution), 3.56 mg (6  $\mu$ mol, 60  $\mu$ L of 100 mM H<sub>2</sub>O/DMSO solution) of CuSO<sub>4</sub>-THPTA, 2.38 mg (12  $\mu$ mol, 120  $\mu$ L of 100 mM H<sub>2</sub>O solution) of sodium ascorbate. The reaction was quenched by adding 2.23 mg (6  $\mu$ mol, 60  $\mu$ L of 100 mM H<sub>2</sub>O solution) of Na<sub>2</sub>EDTA. The RP HPLC (Kinetex C8 column) purification afforded 19.93 mg of **12a** ammonium salt (Yield = 76%). Rt = 14.46 min  
HRMS (ESI) m/z, 436.1028 calculated for C<sub>17</sub>H<sub>19</sub>N<sub>5</sub>O<sub>7</sub>P<sup>-</sup>; found 436.1029

#### **o-HBI-methyl-1H-1,2,3-triazol-1-yl)methyl monophosphonate (12b)**

Obtained according to GP C starting from 300  $\mu$ L (8.16 mg, 60  $\mu$ mol) of **12** (200 mM H<sub>2</sub>O solution), 300  $\mu$ L (7.20 mg, 30  $\mu$ mol) of **21** (100 mM DMSO solution), 3.56 mg (6  $\mu$ mol, 60  $\mu$ L of 100 mM H<sub>2</sub>O/DMSO solution) of CuSO<sub>4</sub>-THPTA, 2.38 mg (0.012  $\mu$ mol, 120  $\mu$ L of 100 mM H<sub>2</sub>O solution) of sodium ascorbate. The reaction was quenched by adding 2.23 mg (6  $\mu$ mol, 60  $\mu$ L of 100 mM H<sub>2</sub>O solution) of Na<sub>2</sub>EDTA. The RP HPLC (Kinetex C8 column) purification afforded 16.74 mg of **12b** ammonium salt (Yield = 74%). Rt = 16.39 min  
HRMS (ESI) m/z, 376.0816 calculated for C<sub>15</sub>H<sub>15</sub>N<sub>5</sub>O<sub>5</sub>P<sup>-</sup>; found 376.0820

#### **HEMABI-methyl-1H-1,2,3-triazol-1-yl)methyl monophosphonate (12c)**

Obtained according to GP C starting from 300  $\mu$ L (8.16 mg, 60  $\mu$ mol) of **12** (200 mM H<sub>2</sub>O solution), 300  $\mu$ L (8.91 mg, 30  $\mu$ mol) of **22** (100 mM DMSO solution), 3.56 mg (6  $\mu$ mol, 60  $\mu$ L of 100 mM H<sub>2</sub>O/DMSO solution) of CuSO<sub>4</sub>-THPTA, 2.38 mg (12  $\mu$ mol, 120  $\mu$ L of 100 mM H<sub>2</sub>O solution) of sodium ascorbate. The reaction was quenched by adding 2.23 mg (6  $\mu$ mol, 60  $\mu$ L of 100 mM H<sub>2</sub>O solution) of Na<sub>2</sub>EDTA. The RP HPLC (Kinetex C8 column) purification afforded 17.98 mg of **12c** ammonium salt (Yield = 69%). Rt = 14.72 min  
HRMS (ESI) m/z, 433.1395 calculated for C<sub>18</sub>H<sub>22</sub>N<sub>6</sub>O<sub>5</sub>P<sup>-</sup>; found 433.1396

#### **ACVJ-methyl-1H-1,2,3-triazol-1-yl)methyl monophosphonate (12d)**

Obtained according to GP C starting from 300  $\mu$ L (8.16 mg, 60  $\mu$ mol) of **12** (200 mM H<sub>2</sub>O solution), 300  $\mu$ L (9.16 mg, 30  $\mu$ mol) of **23** (100 mM DMSO solution), 3.56 mg (6  $\mu$ mol, 60  $\mu$ L

of 100 mM H<sub>2</sub>O/DMSO solution) of CuSO<sub>4</sub>-THPTA, 2.38 mg (12 μmol, 120 μL of 100 mM H<sub>2</sub>O solution) of sodium ascorbate. The reaction was quenched by adding 2.23 mg (6 μmol, 60 μL of 100 mM H<sub>2</sub>O solution) of Na<sub>2</sub>EDTA. The RP HPLC (Kinetex C8 column) purification afforded 16.98 mg of **12d** ammonium salt (Yield = 64%). Rt = 21.42 min (gradient c)  
HRMS (ESI) m/z, 441.1446 calculated for C<sub>20</sub>H<sub>22</sub>N<sub>6</sub>O<sub>4</sub>P<sup>-</sup>; found 441.1450

### **2'+3'-O-(N-(2-Azidoethyl)carbamoyl) guanosine 5'-diphosphate imidazolide (13)**

Obtained according to GP A: GDP triethylammonium salt (98 mg, 0.10 mmol, 1200 mOD) was dissolved in DMSO (2 ml) and CDI (97 mg, 0.600 mmol, 6 equiv) was added. The mixture was stirred and microwaved as described in GP A, then excess of CDI was hydrolyzed by addition of H<sub>2</sub>O (22 μL) and after 15 min of stirring, 2-azidoethylamine (54 μL, 0.60 mmol, 6 equiv) and DBU (15 μL, 0.10 mmol, 1 equiv) was added. The reaction mixture was stirred at RT and monitored by HPLC. After 6h the imidazolide was precipitated by addition of NaClO<sub>4</sub> (73 mg, 0.60 mmol, 6 equiv) in 40 ml cold acetone. 26 mg of imidazolide sodium salt was obtained as a mixture of 2' and 3' isomers. (611 mOD, Yield = 51%). Rt = min  
HRMS (ESI) m/z, 604.0825 calculated for C<sub>16</sub>H<sub>20</sub>N<sub>11</sub>O<sub>11</sub>P<sub>2</sub><sup>-</sup>; found 604.0831

### **2'+3'-O-(N-(2-Azidoethyl)carbamoyl)guanosine 5'-methylene(bisphosphonate) imidazolide (14)**

Obtained according to GP A: GpCH<sub>2</sub>p triethylammonium salt (98 mg, 0.10 mmol, 1200 mOD) was dissolved in DMSO (2 ml) and CDI (97 mg, 0.600 mmol, 6 equiv) was added. The mixture was stirred and microwaved as described in GP A, then excess of CDI was hydrolyzed by addition of H<sub>2</sub>O (22 μL) and after 15 min of stirring, 2-azidoethylamine (54 μL, 0.60 mmol, 6 equiv) and DBU (15 μL, 0.10 mmol, 1 equiv) was added. The reaction mixture was stirred at RT and monitored by HPLC. After 6h the imidazolide was precipitated by addition of NaClO<sub>4</sub> (73 mg, 0.60 mmol, 6 equiv) in 40 ml cold acetone. 40 mg of Imidazolide sodium salt was obtained as a mixture of 2' and 3' isomers based on chromatogram, however, due to aqueous environment, imidazolide hydrolyzed to phosphonate before HRMS analysis. (960 mOD, Yield = 80%). Rt = 6.39 min  
HRMS (ESI) m/z, 552.0763 calculated for C<sub>14</sub>H<sub>20</sub>N<sub>9</sub>O<sub>11</sub>P<sub>2</sub><sup>-</sup>; found 552.0769

### **2'+3'-O-(N-(2-Azidoethyl)carbamoyl)adenosine 5'-diphosphate imidazolide (15)**

Obtained according to GP A: ADP triethylammonium salt (200 mg, 0.274 mmol) was dissolved in DMSO (5 ml) and CDI (222 mg, 1.37 mmol, 5 equiv) was added. The mixture was stirred at RT for 1h, then excess of CDI was hydrolyzed by addition of H<sub>2</sub>O (49 μL) and after 15 min of stirring, 2-azidoethylamine was added (246 μL, 236 mg, 2.73 mmol, 10 equiv). The reaction mixture was stirred at RT and monitored by HPLC. After 24h the imidazolide was precipitated by addition of NaClO<sub>4</sub> (335 mg, 2.73 mmol, 10 equiv) in 50 ml cold acetone. Imidazolide sodium salt was obtained as a mixture of 2' and 3' isomers. (Yield: 91 mg, 52%). Rt = 7.32 min (isomer 2') and 7.93 min (isomer 3')  
HRMS (ESI) m/z, 588.0875 calculated for C<sub>16</sub>H<sub>20</sub>N<sub>11</sub>O<sub>10</sub>P<sub>2</sub><sup>-</sup>; found 588.0881

### **2'+3'-O-(N-(Propargyl)carbamoyl)guanosine 5'-iodide (16)**

5'-I-Guanosine (500 mg, 1.28 mmol) was dissolved in DMSO (20 ml) and CDI (1.03 g, 6.38 mmol, 5 equiv) was added. The mixture was stirred at RT for 1 h, then excess of CDI was hydrolyzed by addition of H<sub>2</sub>O (230 μL) and after 15 min of stirring propargylamine was added (702 mg, 12.75 mmol, 10 equiv). The reaction mixture was stirred at RT and monitored by HPLC. After 24 h the crude product was precipitated by addition of 200 ml 1:1 mixture of CH<sub>2</sub>Cl<sub>2</sub>/H<sub>2</sub>O. White precipitate was washed with CH<sub>2</sub>Cl<sub>2</sub> and dried in under high vacuum (Yield: 548 mg,

90% as a mixture of 2' and 3' isomers). Rt = 15.58 min (isomer 3') and 16.45 min (isomer 2'). For NMR analysis small amount of isomers were separated and purified on RP-HPLC.

Isomer 2' (Rt = 16.45 min)

$^1\text{H}$  NMR (500 MHz, DMSO- $d_6$ )  $\delta$  [ppm] 7.91 (d,  $J$  = 4.9 Hz, 1H), 7.86 (s, 1H), 6.27 (s, 1H), 5.15 (d,  $J$  = 14.9 Hz, 1H), 4.92 (dd,  $J$  = 5.6, 3.4 Hz, 1H), 4.79 (d,  $J$  = 3.3 Hz, 1H), 4.11 (d,  $J$  = 5.7 Hz, 1H), 3.78 – 3.74 (m, 2H)

Isomer 3' (Rt = 15.58 min)

$^1\text{H}$  NMR (500 MHz, DMSO- $d_6$ )  $\delta$  [ppm] 7.93 (s, 1H), 5.70 (d,  $J$  = 7.6 Hz, 1H), 5.12 (dd,  $J$  = 5.4, 2.1 Hz, 1H), 4.93 (dd,  $J$  = 7.5, 5.4 Hz, 1H), 4.11 (td,  $J$  = 6.7, 2.2 Hz, 1H), 3.76 (d,  $J$  = 5.6 Hz, 1H).

HRMS (ESI)  $m/z$ , 473.0076 calculated for  $\text{C}_{14}\text{H}_{14}\text{IN}_6\text{O}_5^-$ ; found 473.0080

### 2'+3'-O-(N-(Propargyl)carbamoyl)guanosine 5'-monothiophosphate (17)

To a suspension of 2'+3'-O-(N-(Propargyl)carbamoyl)guanosine 5'-iodide (**16**) (0.5 g, 1.06 mmol) in 10 mL of DMF, trisodium thiophosphate (0.53 g, 1.27 mmol) was added followed by addition of Et<sub>3</sub>N (0.43 g, 728 μL, 4.23 mmol). The reaction mixture was stirred for 6 h at 5°C. The reaction mixture was dissolved in 50 mL of water and purified by AIEC on Sephadex. The fractions containing the desired product were collected and freeze-dried. Yield: 6186 mOD, 0.51 mmol (Yield = 64%). Rt = 6.44 min

<sup>1</sup>H NMR (500 MHz, DMSO-*d*<sub>6</sub>) δ [ppm] 7.99 (s, 1H), 7.96 (s, 1H), 5.91 (d, *J* = 6.2 Hz, 1H), 5.81 (d, *J* = 3.8 Hz, 1H), 5.68 (d, *J* = 7.5 Hz, 1H), 5.63 (d, *J* = 7.6 Hz, 1H), 5.48 (t, *J* = 5.8 Hz, 1H), 5.35 (dd, *J* = 5.6, 3.7 Hz, 1H), 5.24 (d, *J* = 5.2 Hz, 1H), 5.13 (dd, *J* = 5.4, 2.2 Hz, 1H), 5.03 (dd, *J* = 7.7, 5.0 Hz, 1H), 4.87 (dd, *J* = 7.6, 5.5 Hz, 1H), 4.75 (t, *J* = 5.8 Hz, 1H), 4.40 (dd, *J* = 5.3, 3.6 Hz, 1H), 4.19 (d, *J* = 7.4 Hz, 1H), 4.05 (td, *J* = 6.2, 2.1 Hz, 1H), 3.93 (td, *J* = 6.1, 3.6 Hz, 1H), 3.13 (d, *J* = 2.5 Hz, 1H), 3.09 (d, *J* = 2.4 Hz, 1H)

<sup>31</sup>P NMR (203 MHz, DMSO-*d*<sub>6</sub>) δ [ppm] 12.09 (s, 1P), 11.72 (s, 1P)

HRMS (ESI) *m/z*, 459.0493 calculated for C<sub>14</sub>H<sub>16</sub>N<sub>6</sub>O<sub>8</sub>PS<sup>-</sup>; found 459.0501

### 2'+3'-O-(N-(Propargyl)carbamoyl)guanosine 5'-monothiophosphate imidazolide (18)

Compound **18** was prepared according to Mukaiyama protocol<sup>1,2</sup>. 2'+3'-O-(N-(Propargyl)carbamoyl)guanosine 5'-monothiophosphate (**17**) (TEA<sup>+</sup> salt, 1 g, 1.51 mmol), imidazole (1.03 g, 15.09 mmol, 10 equiv), 2,2'-dithiodipyridine (DTDP) (997.25 mg, 4.53 mmol, 3 equiv) were mixed in DMF (10 mL) before addition of triethylamine (458.06 mg, 4.53 mmol, 3 equiv) and triphenylphosphine (PPh<sub>3</sub>) (1.19 g, 4.53 mmol, 3 equiv). The mixture was stirred for 6 h or overnight at room temperature and progress was monitored by HPLC. Addition of a solution of anhydrous NaClO<sub>4</sub> (1.84 g) in 100 mL dry acetone resulted in precipitation of the product as sodium salt. The suspension was cooled at 4 °C and the precipitate was filtered off, washed repeatedly with cold, dry acetone and dried in vacuum over P<sub>4</sub>O<sub>10</sub>. (Yield: 914 mg, 87%). Rt = 9.65 min (isomer 2') and 10.58 min (isomer 3')

HRMS (ESI) *m/z*, 509.0762 calculated for C<sub>17</sub>H<sub>18</sub>N<sub>8</sub>O<sub>7</sub>PS<sup>-</sup>; found 509.0764

### 2'+3'-O-(N-(2-Azidoethyl)carbamoyl)-2,2,7-trimethylguanosine monophosphate imidazolide (19)

Obtained according to GP A: TMGMP triethylammonium salt (25 mg, 0.052 mmol, 622 mOD) was dissolved in DMSO (1 ml) and CDI (51 mg, 0.310 mmol, 6 equiv) was added. The mixture was stirred and microwaved as described in GP A, then excess of CDI was hydrolyzed by addition of H<sub>2</sub>O (14 μL) and after 15 min of stirring, 2-azidoethylamine (20 μL, 0.310 mmol, 6 equiv) and DBU (20 μL, 0.052 mmol, 1 equiv) was added. The reaction mixture was stirred at RT and monitored by HPLC. After 6h the imidazolide was precipitated by addition of LiClO<sub>4</sub> (33 mg, 0.310 mmol, 6 equiv) in 40 ml cold acetonitrile. Imidazolide lithium salt was obtained as a mixture of 2' and 3' isomers. (Yield: 19 mg, 387 mOD, 62%).

HRMS (ESI) *m/z*, 566.1631 calculated for C<sub>19</sub>H<sub>25</sub>N<sub>11</sub>O<sub>8</sub>P<sup>-</sup>; found 566.1633

## References

1. T. Mukaiyama and M. Hashimoto, *J. Am. Chem. Soc.*, 1972, **94** (24), 8528–8532.
2. T. Mukaiyama and M. Hashimoto, *Bulletin of the Chemical Society of Japan*, 1971, **44** (8), 2284.

## TABLE OF CONTENTS

|                                                                                                                                                  |     |
|--------------------------------------------------------------------------------------------------------------------------------------------------|-----|
| Compound 1-2': TMGpppG-2'-O-C(O)-NH-CH <sub>2</sub> -CH <sub>2</sub> -N <sub>3</sub> (NH <sub>4</sub> <sup>+</sup> salt) .....                   | 25  |
| Compound 1-3': TMGpppG-3'-O-C(O)-NH-CH <sub>2</sub> -CH <sub>2</sub> -N <sub>3</sub> (NH <sub>4</sub> <sup>+</sup> salt) .....                   | 30  |
| Compound 2-2': TMG-5'-S-pppG-2'-O-C(O)NH-CH <sub>2</sub> CH <sub>2</sub> N <sub>3</sub> (NH <sub>4</sub> <sup>+</sup> salt) .....                | 37  |
| Compound 2-3': TMG-5'-S-pppG-3'-O-C(O)NH-CH <sub>2</sub> CH <sub>2</sub> N <sub>3</sub> (NH <sub>4</sub> <sup>+</sup> salt) .....                | 43  |
| Compound 3-2': TMGppCH <sub>2</sub> pG-2'-O-C(O)NH-CH <sub>2</sub> CH <sub>2</sub> N <sub>3</sub> (NH <sub>4</sub> <sup>+</sup> salt) .....      | 50  |
| Compound 3-3': TMGppCH <sub>2</sub> pG-3'-O-C(O)NH-CH <sub>2</sub> CH <sub>2</sub> N <sub>3</sub> (NH <sub>4</sub> <sup>+</sup> salt) .....      | 55  |
| Compound 4-2': TMGpppA-2'-O-C(O)-NH-CH <sub>2</sub> -CH <sub>2</sub> -N <sub>3</sub> (NH <sub>4</sub> <sup>+</sup> salt) .....                   | 60  |
| Compound 4-3': TMGpppA-3'-O-C(O)-NH-CH <sub>2</sub> -CH <sub>2</sub> -N <sub>3</sub> (NH <sub>4</sub> <sup>+</sup> salt) .....                   | 65  |
| Compound 5-2': TMGppppG-2'-O-C(O)-NH-CH <sub>2</sub> CH <sub>2</sub> -N <sub>3</sub> (NH <sub>4</sub> <sup>+</sup> salt) .....                   | 70  |
| Compound 5-3': TMGppppG-3'-O-C(O)-NH-CH <sub>2</sub> CH <sub>2</sub> -N <sub>3</sub> (NH <sub>4</sub> <sup>+</sup> salt) .....                   | 75  |
| Compound 6: TMGppppA-2'+3'-O-C(O)-NH-CH <sub>2</sub> CH <sub>2</sub> -N <sub>3</sub> (NH <sub>4</sub> <sup>+</sup> salt) .....                   | 80  |
| Compound 7-2': TMGppp-5'-SG-2'-O-C(O)-NH-C <sub>3</sub> H <sub>3</sub> (NH <sub>4</sub> <sup>+</sup> salt) .....                                 | 85  |
| Compound 7-3': TMGppp-5'-SG-3'-O-C(O)-NH-C <sub>3</sub> H <sub>3</sub> (NH <sub>4</sub> <sup>+</sup> salt) .....                                 | 91  |
| Compound 8: TMGpppG-N1-C <sub>3</sub> H <sub>3</sub> (NH <sub>4</sub> <sup>+</sup> salt) .....                                                   | 98  |
| Compound 9-2': TMG(-2'-O-C(O)-NH-CH <sub>2</sub> CH <sub>2</sub> -N <sub>3</sub> )pppG (NH <sub>4</sub> <sup>+</sup> salt) .....                 | 103 |
| Compound 9-3': TMG(-3'-O-C(O)-NH-CH <sub>2</sub> CH <sub>2</sub> -N <sub>3</sub> )pppG (NH <sub>4</sub> <sup>+</sup> salt) .....                 | 108 |
| Compound 10-2': GMP-2'-O-C(O)-NH-CH <sub>2</sub> CH <sub>2</sub> -N <sub>3</sub> (NH <sub>4</sub> <sup>+</sup> salt) .....                       | 113 |
| Compound 10-3': GMP-3'-O-C(O)-NH-CH <sub>2</sub> CH <sub>2</sub> -N <sub>3</sub> (NH <sub>4</sub> <sup>+</sup> salt) .....                       | 120 |
| Compound 11-2': GMP-2'-O-C(O)-NH-C <sub>3</sub> H <sub>3</sub> (NH <sub>4</sub> <sup>+</sup> salt) .....                                         | 127 |
| Compound 11-3': GMP-3'-O-C(O)-NH-C <sub>3</sub> H <sub>3</sub> (NH <sub>4</sub> <sup>+</sup> salt) .....                                         | 134 |
| Compound 1a-2': TMGpppG-2'-O-C(O)-NH-CH <sub>2</sub> -CH <sub>2</sub> -triazole-CH <sub>2</sub> -DMHBI (NH <sub>4</sub> <sup>+</sup> salt) ..... | 141 |

|                                                                                                                                                                   |     |
|-------------------------------------------------------------------------------------------------------------------------------------------------------------------|-----|
| Compound 1a-3': TMGpppG-3'-O-C(O)-NH-CH <sub>2</sub> -CH <sub>2</sub> -triazole-CH <sub>2</sub> -DMHBI (NH <sub>4</sub> <sup>+</sup> salt) .....                  | 143 |
| Compound 1b-2': TMGpppG-2'-O-C(O)-NH-CH <sub>2</sub> -CH <sub>2</sub> -triazole-CH <sub>2</sub> -oHBI (NH <sub>4</sub> <sup>+</sup> salt) .....                   | 145 |
| Compound 1b-3': TMGpppG-3'-O-C(O)-NH-CH <sub>2</sub> -CH <sub>2</sub> -triazole-CH <sub>2</sub> -oHBI (NH <sub>4</sub> <sup>+</sup> salt) .....                   | 147 |
| Compound 1c-2': TMGpppG-2'-O-C(O)-NH-CH <sub>2</sub> -CH <sub>2</sub> -triazole-CH <sub>2</sub> -HEMABI (NH <sub>4</sub> <sup>+</sup> salt) .....                 | 149 |
| Compound 1c-3': TMGpppG-3'-O-C(O)-NH-CH <sub>2</sub> -CH <sub>2</sub> -triazole-CH <sub>2</sub> -HEMABI (NH <sub>4</sub> <sup>+</sup> salt) .....                 | 151 |
| Compound 1d-2': TMGpppG-2'-O-C(O)-NH-CH <sub>2</sub> -CH <sub>2</sub> -triazole-CH <sub>2</sub> -ACVJ (NH <sub>4</sub> <sup>+</sup> salt) .....                   | 153 |
| Compound 1d-3': TMGpppG-3'-O-C(O)-NH-CH <sub>2</sub> -CH <sub>2</sub> -triazole-CH <sub>2</sub> -ACVJ (NH <sub>4</sub> <sup>+</sup> salt) .....                   | 155 |
| Compound 2a-2': TMG-5'-SpppG-2'-O-C(O)-NH-CH <sub>2</sub> -CH <sub>2</sub> -triazole-CH <sub>2</sub> -DMHBI (NH <sub>4</sub> <sup>+</sup> salt) .....             | 157 |
| Compound 2a-3': TMG-5'-SpppG-3'-O-C(O)-NH-CH <sub>2</sub> -CH <sub>2</sub> -triazole-CH <sub>2</sub> -DMHBI (NH <sub>4</sub> <sup>+</sup> salt) .....             | 159 |
| Compound 3a-2': TMGppCH <sub>2</sub> pG-2'-O-C(O)-NH-CH <sub>2</sub> -CH <sub>2</sub> -triazole-CH <sub>2</sub> -DMHBI (NH <sub>4</sub> <sup>+</sup> salt).....   | 161 |
| Compound 3a-3': TMGppCH <sub>2</sub> pG-3'-O-C(O)-NH-CH <sub>2</sub> -CH <sub>2</sub> -triazole-CH <sub>2</sub> -DMHBI (NH <sub>4</sub> <sup>+</sup> salt).....   | 163 |
| Compound 3c-2': TMGppCH <sub>2</sub> pG-2'-O-C(O)-NH-CH <sub>2</sub> -CH <sub>2</sub> -triazole-CH <sub>2</sub> -HEMABI (NH <sub>4</sub> <sup>+</sup> salt) ..... | 165 |
| Compound 3c-3': TMGppCH <sub>2</sub> pG-3'-O-C(O)-NH-CH <sub>2</sub> -CH <sub>2</sub> -triazole-CH <sub>2</sub> -HEMABI (NH <sub>4</sub> <sup>+</sup> salt) ..... | 167 |
| Compound 4a-2': TMGpppA-2'-O-C(O)-NH-CH <sub>2</sub> -CH <sub>2</sub> -triazole-CH <sub>2</sub> -DMHBI (NH <sub>4</sub> <sup>+</sup> salt).....                   | 169 |
| Compound 4a-3': TMGpppA-3'-O-C(O)-NH-CH <sub>2</sub> -CH <sub>2</sub> -triazole-CH <sub>2</sub> -DMHBI (NH <sub>4</sub> <sup>+</sup> salt).....                   | 171 |
| Compound 4c-2': TMGpppA-2'-O-C(O)-NH-CH <sub>2</sub> -CH <sub>2</sub> -triazole-CH <sub>2</sub> -HEMABI (NH <sub>4</sub> <sup>+</sup> salt) .....                 | 173 |
| Compound 4c-3': TMGpppA-3'-O-C(O)-NH-CH <sub>2</sub> -CH <sub>2</sub> -triazole-CH <sub>2</sub> -HEMABI (NH <sub>4</sub> <sup>+</sup> salt) .....                 | 175 |
| Compound 5a-2': TMGppppG-2'-O-C(O)-NH-CH <sub>2</sub> -CH <sub>2</sub> -triazole-CH <sub>2</sub> -DMHBI (NH <sub>4</sub> <sup>+</sup> salt) .....                 | 177 |
| Compound 5a-3': TMGppppG-3'-O-C(O)-NH-CH <sub>2</sub> -CH <sub>2</sub> -triazole-CH <sub>2</sub> -DMHBI (NH <sub>4</sub> <sup>+</sup> salt) .....                 | 179 |
| Compound 5c-2': TMGppppG-2'-O-C(O)-NH-CH <sub>2</sub> -CH <sub>2</sub> -triazole-CH <sub>2</sub> -HEMABI (NH <sub>4</sub> <sup>+</sup> salt).....                 | 181 |
| Compound 5c-3': TMGppppG-3'-O-C(O)-NH-CH <sub>2</sub> -CH <sub>2</sub> -triazole-CH <sub>2</sub> -HEMABI (NH <sub>4</sub> <sup>+</sup> salt).....                 | 183 |
| Compound 6a: TMGppppA-2'+3'-O-C(O)-NH-CH <sub>2</sub> -CH <sub>2</sub> -triazole-CH <sub>2</sub> -DMHBI (NH <sub>4</sub> <sup>+</sup> salt).....                  | 185 |
| Compound 6c: TMGppppA-2'+3'-O-C(O)-NH-CH <sub>2</sub> -CH <sub>2</sub> -triazole-CH <sub>2</sub> -HEMABI (NH <sub>4</sub> <sup>+</sup> salt) .....                | 187 |
| Compound 7a-2': TMGppp-5'-SG-2'-O-C(O)-NH-CH <sub>2</sub> -triazole-CH <sub>2</sub> CH <sub>2</sub> -DMHBI (NH <sub>4</sub> <sup>+</sup> salt) .....              | 189 |

|                                                                                                                                                      |     |
|------------------------------------------------------------------------------------------------------------------------------------------------------|-----|
| Compound 7a-3': TMGppp-5'-SG-3'-O-C(O)-NH-CH <sub>2</sub> -triazole-CH <sub>2</sub> CH <sub>2</sub> -DMHBI (NH <sub>4</sub> <sup>+</sup> salt) ..... | 191 |
| Compound 7b-2': TMGppp-5'-SG-2'-O-C(O)-NH-CH <sub>2</sub> -triazole-CH <sub>2</sub> CH <sub>2</sub> -oHBI (NH <sub>4</sub> <sup>+</sup> salt) .....  | 193 |
| Compound 7b-3': TMGppp-5'-SG-3'-O-C(O)-NH-CH <sub>2</sub> -triazole-CH <sub>2</sub> CH <sub>2</sub> -oHBI (NH <sub>4</sub> <sup>+</sup> salt) .....  | 195 |
| Compound 8a: TMGpppG-N1-CH <sub>2</sub> -triazole-CH <sub>2</sub> CH <sub>2</sub> -DMHBI (NH <sub>4</sub> <sup>+</sup> salt) .....                   | 197 |
| Compound 8b: TMGpppG-N1-CH <sub>2</sub> -triazole-CH <sub>2</sub> CH <sub>2</sub> -oHBI (NH <sub>4</sub> <sup>+</sup> salt) .....                    | 199 |
| Compound 9a-2': TMG(-2'-O-C(O)-NH-CH <sub>2</sub> -CH <sub>2</sub> -triazole-CH <sub>2</sub> -DMHBI)pppG (NH <sub>4</sub> <sup>+</sup> salt) .....   | 201 |
| Compound 9a-3': TMG(-3'-O-C(O)-NH-CH <sub>2</sub> -CH <sub>2</sub> -triazole-CH <sub>2</sub> -DMHBI)pppG (NH <sub>4</sub> <sup>+</sup> salt) .....   | 203 |
| Compound 9b-2': TMG(-2'-O-C(O)-NH-CH <sub>2</sub> -CH <sub>2</sub> -triazole-CH <sub>2</sub> -oHBI)pppG (NH <sub>4</sub> <sup>+</sup> salt) .....    | 205 |
| Compound 9b-3': TMG(-3'-O-C(O)-NH-CH <sub>2</sub> -CH <sub>2</sub> -triazole-CH <sub>2</sub> -oHBI)pppG (NH <sub>4</sub> <sup>+</sup> salt) .....    | 207 |
| Compound 10a-2': GMP-2'-O-C(O)-NH-CH <sub>2</sub> -CH <sub>2</sub> -triazole-CH <sub>2</sub> -DMHBI (NH <sub>4</sub> <sup>+</sup> salt) .....        | 209 |
| Compound 10a-3': GMP-3'-O-C(O)-NH-CH <sub>2</sub> -CH <sub>2</sub> -triazole-CH <sub>2</sub> -DMHBI (NH <sub>4</sub> <sup>+</sup> salt) .....        | 211 |
| Compound 10b-2': GMP-2'-O-C(O)-NH-CH <sub>2</sub> -CH <sub>2</sub> -triazole-CH <sub>2</sub> -oHBI (NH <sub>4</sub> <sup>+</sup> salt) .....         | 213 |
| Compound 10b-3': GMP-3'-O-C(O)-NH-CH <sub>2</sub> -CH <sub>2</sub> -triazole-CH <sub>2</sub> -oHBI (NH <sub>4</sub> <sup>+</sup> salt) .....         | 215 |
| Compound 10c-2': GMP-2'-O-C(O)-NH-CH <sub>2</sub> -CH <sub>2</sub> -triazole-CH <sub>2</sub> -HEMABI (NH <sub>4</sub> <sup>+</sup> salt) .....       | 217 |
| Compound 10c-3': GMP-3'-O-C(O)-NH-CH <sub>2</sub> -CH <sub>2</sub> -triazole-CH <sub>2</sub> -HEMABI (NH <sub>4</sub> <sup>+</sup> salt) .....       | 219 |
| Compound 10d-2': GMP-2'-O-C(O)-NH-CH <sub>2</sub> -CH <sub>2</sub> -triazole-CH <sub>2</sub> -ACVJ (NH <sub>4</sub> <sup>+</sup> salt) .....         | 221 |
| Compound 10d-3': GMP-3'-O-C(O)-NH-CH <sub>2</sub> -CH <sub>2</sub> -triazole-CH <sub>2</sub> -ACVJ (NH <sub>4</sub> <sup>+</sup> salt) .....         | 223 |
| Compound 11b-2': GMP-2'-O-C(O)-NH-CH <sub>2</sub> -triazole-CH <sub>2</sub> CH <sub>2</sub> -oHBI (NH <sub>4</sub> <sup>+</sup> salt) .....          | 225 |
| Compound 11b-3': GMP-3'-O-C(O)-NH-CH <sub>2</sub> -triazole-CH <sub>2</sub> CH <sub>2</sub> -oHBI (NH <sub>4</sub> <sup>+</sup> salt) .....          | 227 |
| Compound 12a: phosphonate-CH <sub>2</sub> -triazole-CH <sub>2</sub> -DMHBI (NH <sub>4</sub> <sup>+</sup> salt) .....                                 | 229 |
| Compound 12b: phosphonate-CH <sub>2</sub> -triazole-CH <sub>2</sub> -oHBI (NH <sub>4</sub> <sup>+</sup> salt) .....                                  | 231 |
| Compound 12c: phosphonate-CH <sub>2</sub> -triazole-CH <sub>2</sub> -HEMABI (NH <sub>4</sub> <sup>+</sup> salt) .....                                | 233 |
| Compound 12d: phosphonate-CH <sub>2</sub> -triazole-CH <sub>2</sub> -ACVJ (NH <sub>4</sub> <sup>+</sup> salt) .....                                  | 235 |
| Compound 13: Im-GDP-2'+3'-O-C(O)-NH-CH <sub>2</sub> CH <sub>2</sub> -N <sub>3</sub> (NH <sub>4</sub> <sup>+</sup> salt) .....                        | 237 |

|                                                                                                                                               |     |
|-----------------------------------------------------------------------------------------------------------------------------------------------|-----|
| Compound 14: Im-GpCH <sub>2</sub> p-2'+3'-O-C(O)-NH-CH <sub>2</sub> CH <sub>2</sub> -N <sub>3</sub> (NH <sub>4</sub> <sup>+</sup> salt) ..... | 239 |
| Compound 15: Im-ADP-2'+3'-O-C(O)-NH-CH <sub>2</sub> CH <sub>2</sub> -N <sub>3</sub> (NH <sub>4</sub> <sup>+</sup> salt) .....                 | 241 |
| Compound 16: 5'-I-Guo-2'+3'-O-C(O)-NH-C <sub>3</sub> H <sub>3</sub> .....                                                                     | 243 |
| Compound 17: 5'-S-GMP-2'+3'-O-C(O)-NH-C <sub>3</sub> H <sub>3</sub> (NH <sub>4</sub> <sup>+</sup> salt).....                                  | 245 |
| Compound 18: Im-5'-S-GMP-2'+3'-O-C(O)-NH-C <sub>3</sub> H <sub>3</sub> (NH <sub>4</sub> <sup>+</sup> salt) .....                              | 247 |
| Compound 19: Im-TMGMP-2'+3'-O-C(O)-NH-CH <sub>2</sub> CH <sub>2</sub> -N <sub>3</sub> (NH <sub>4</sub> <sup>+</sup> salt).....                | 249 |
| Compound 20: DMHBI-C <sub>3</sub> H <sub>3</sub> .....                                                                                        | 251 |
| Compound 21: oHBI-C <sub>3</sub> H <sub>3</sub> .....                                                                                         | 255 |
| Compound 22: HEMABI-C <sub>3</sub> H <sub>3</sub> .....                                                                                       | 261 |
| Compound 23: ACVJ-C <sub>3</sub> H <sub>3</sub> .....                                                                                         | 265 |
| Compound 24: DMHBI-CH <sub>2</sub> CH <sub>2</sub> -N <sub>3</sub> .....                                                                      | 269 |
| Compound 25: oHBI-CH <sub>2</sub> CH <sub>2</sub> -N <sub>3</sub> .....                                                                       | 273 |



Compound 1-2': TMGpppG-2'-O-C(O)-NH-CH<sub>2</sub>-CH<sub>2</sub>-N<sub>3</sub> (NH<sub>4</sub><sup>+</sup> salt)

Chemical structure

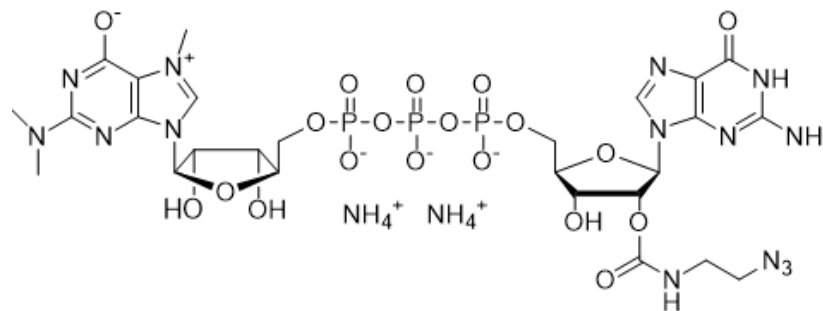

RP-HPLC (conditions c)

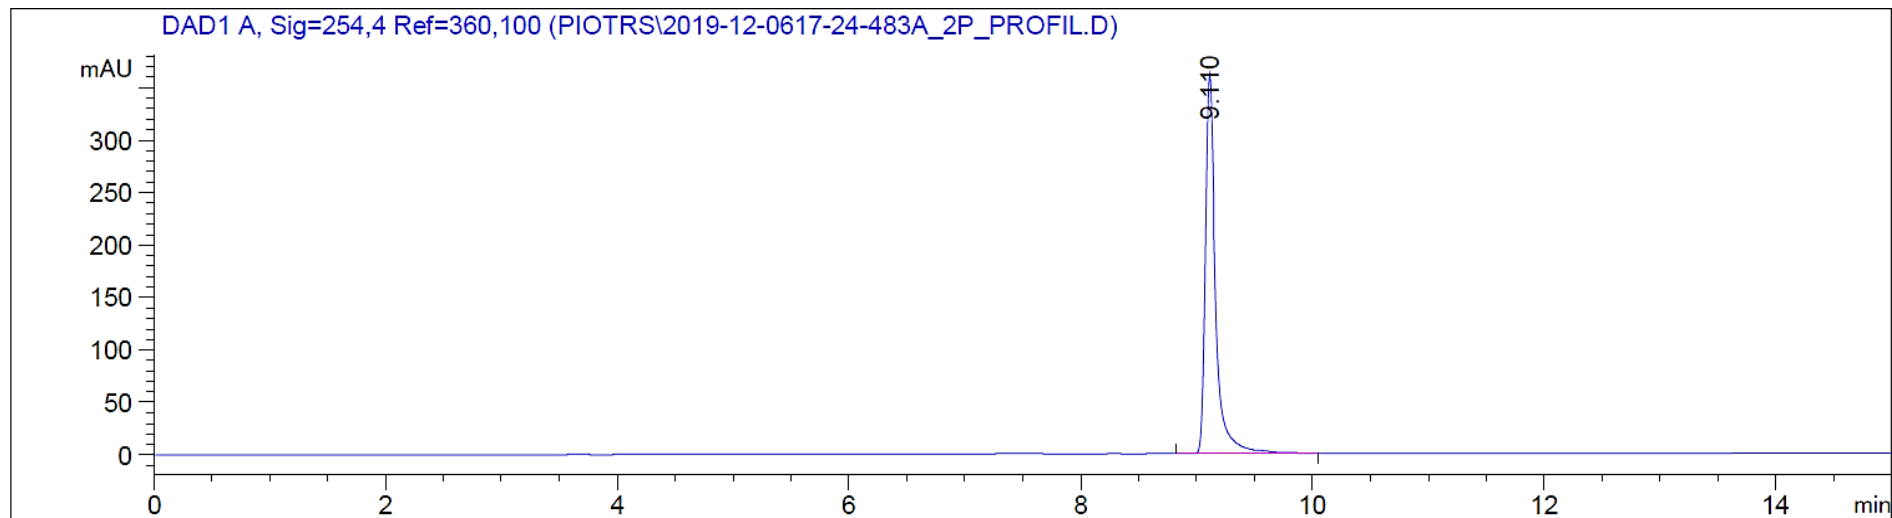

MS (-) ESI (Calc. [M-H]<sup>-</sup> C<sub>26</sub>H<sub>36</sub>N<sub>14</sub>O<sub>19</sub>P<sub>3</sub> : 941.1500, found: 941.15085)

191220\_PSu\_30 #130-219 RT: 1.25-2.11 AV: 90 NL: 2.33E6  
T: FTMS + p ESI Full ms [150.0000-2000.0000]

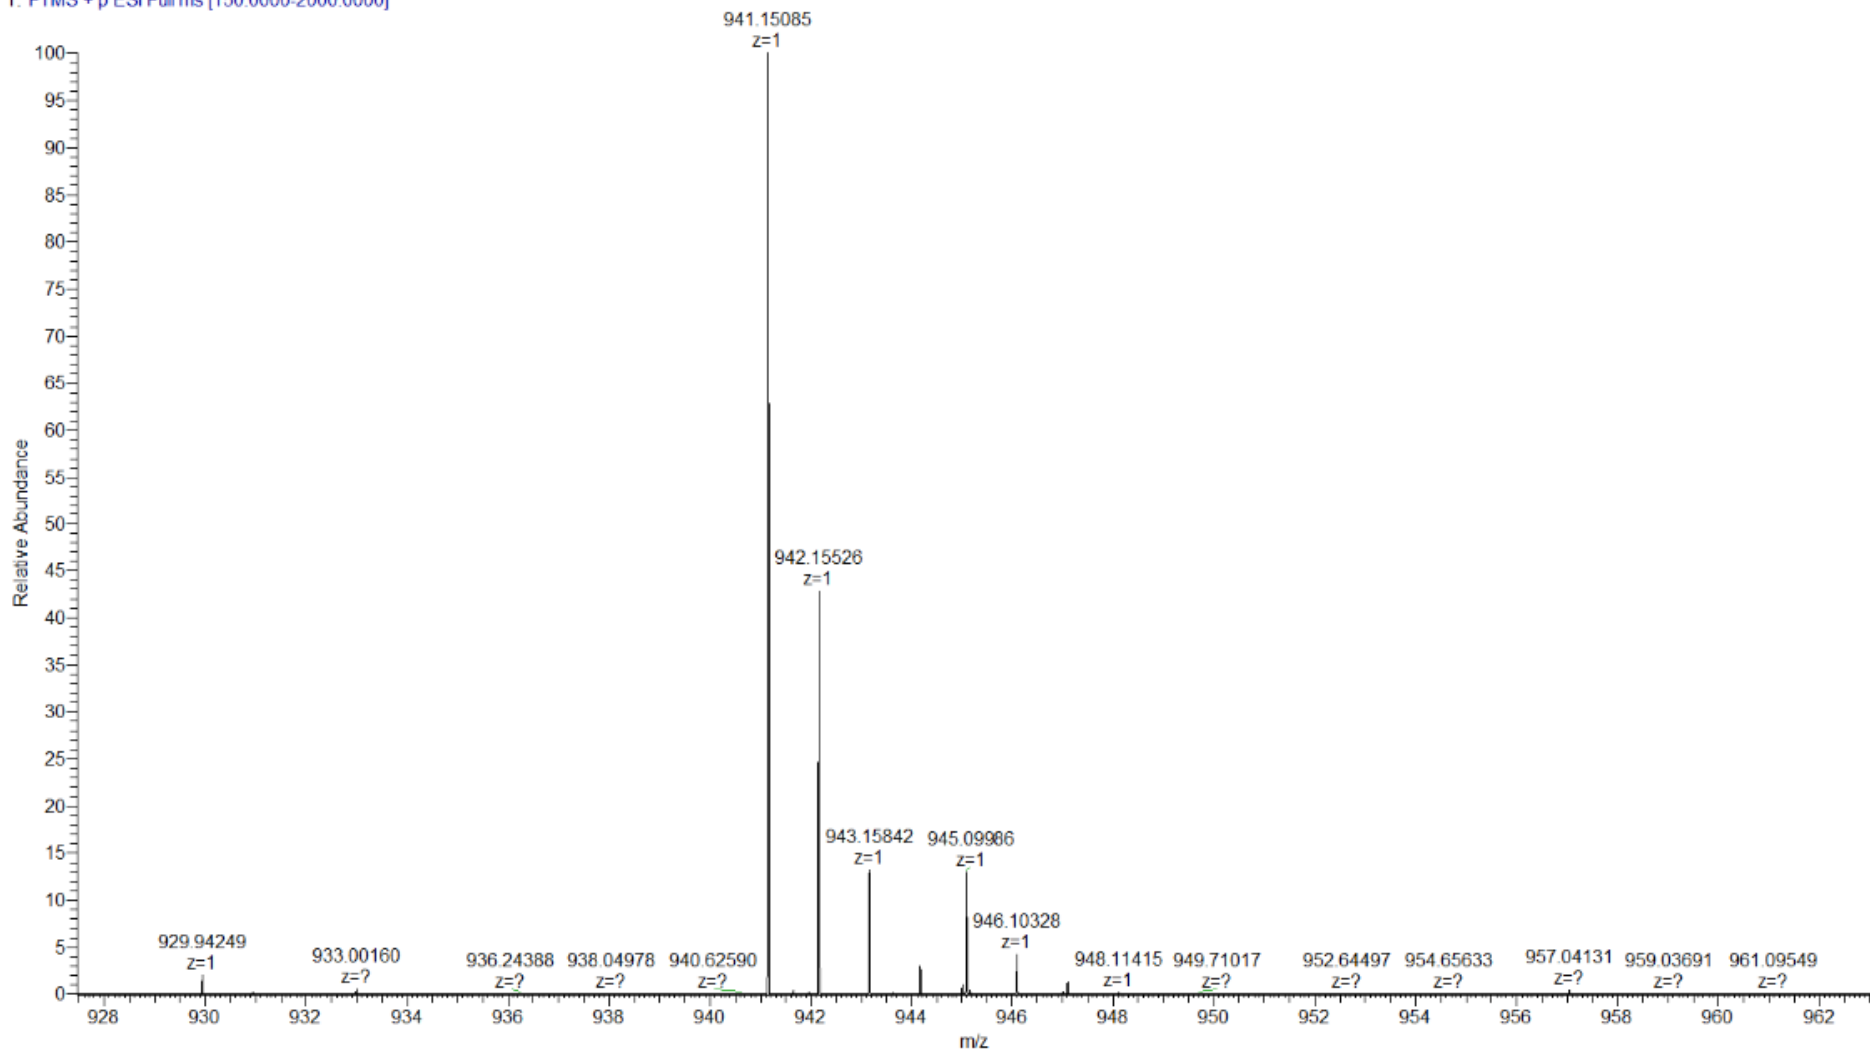

<sup>1</sup>H NMR (500 Hz, D<sub>2</sub>O, 25°C)

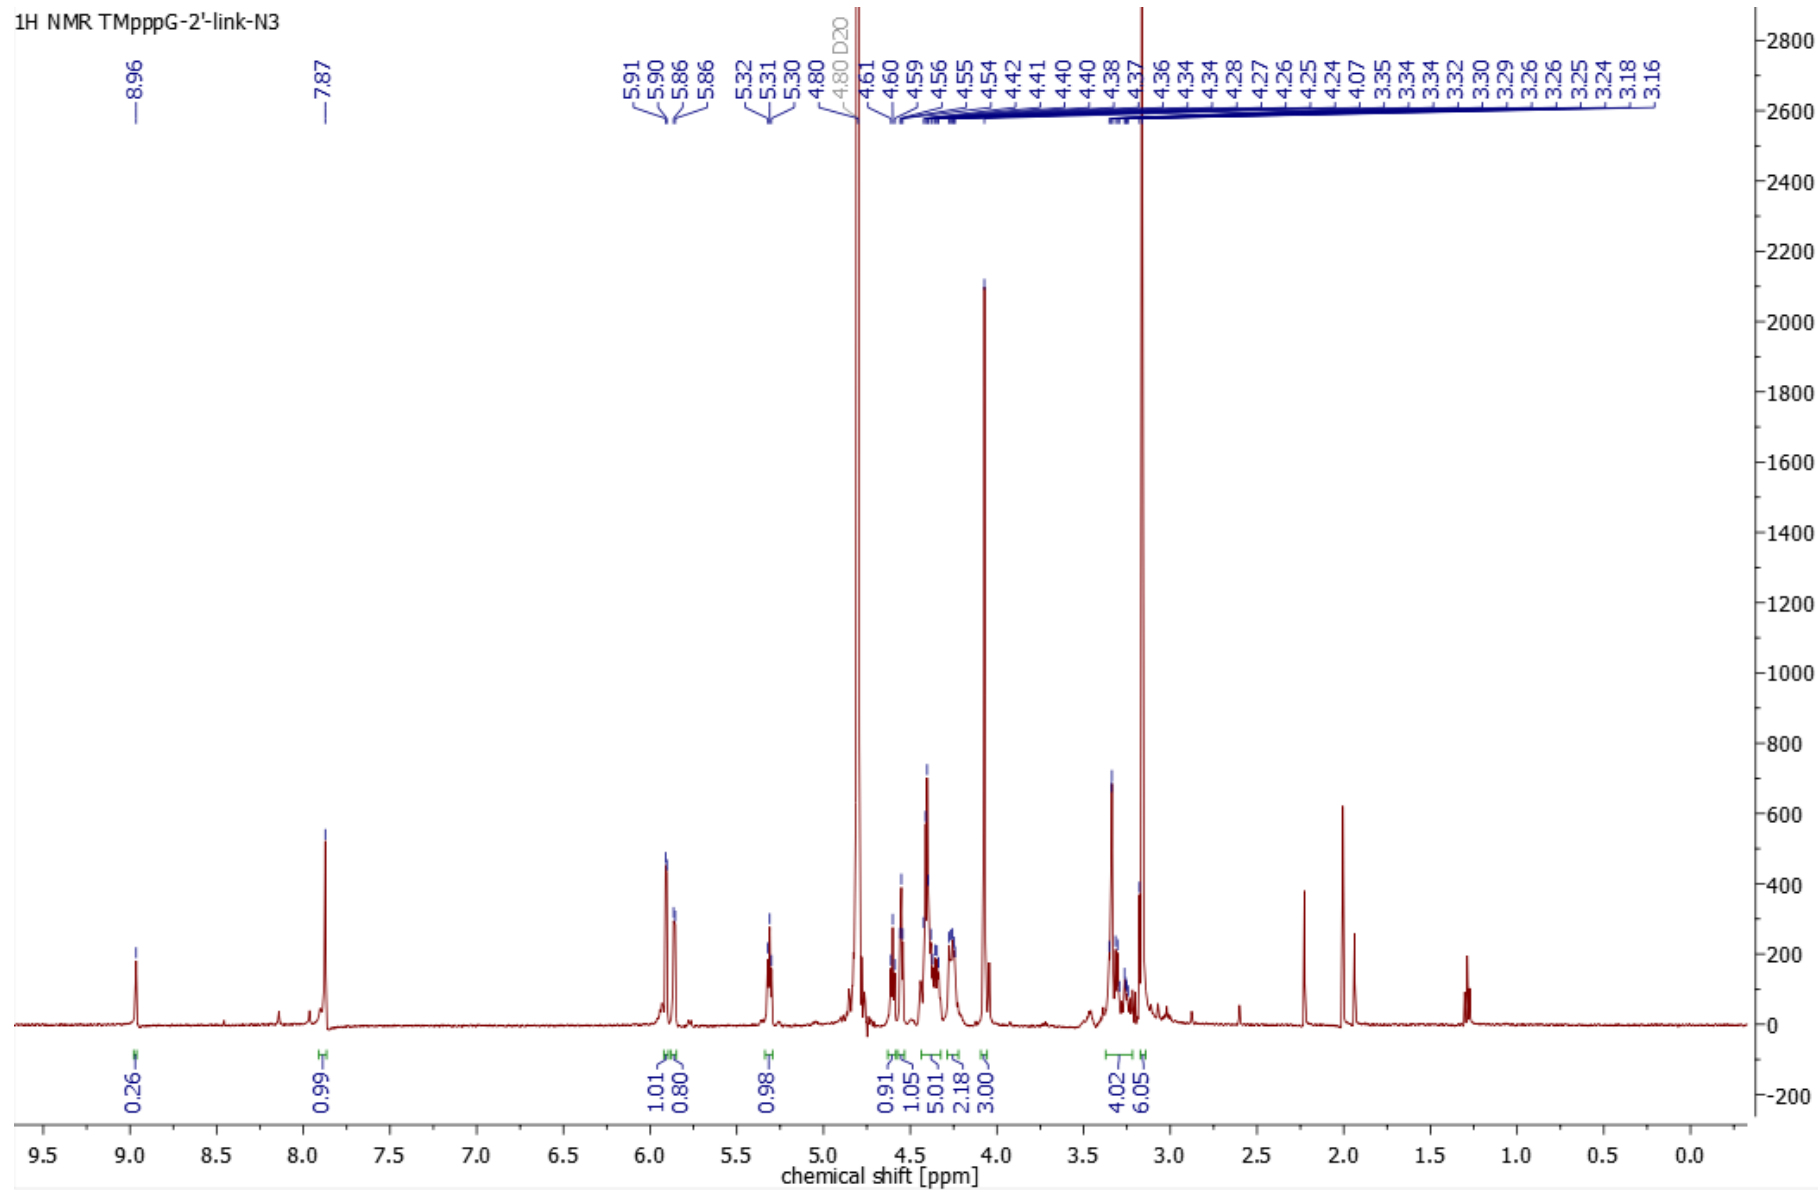

COSY NMR

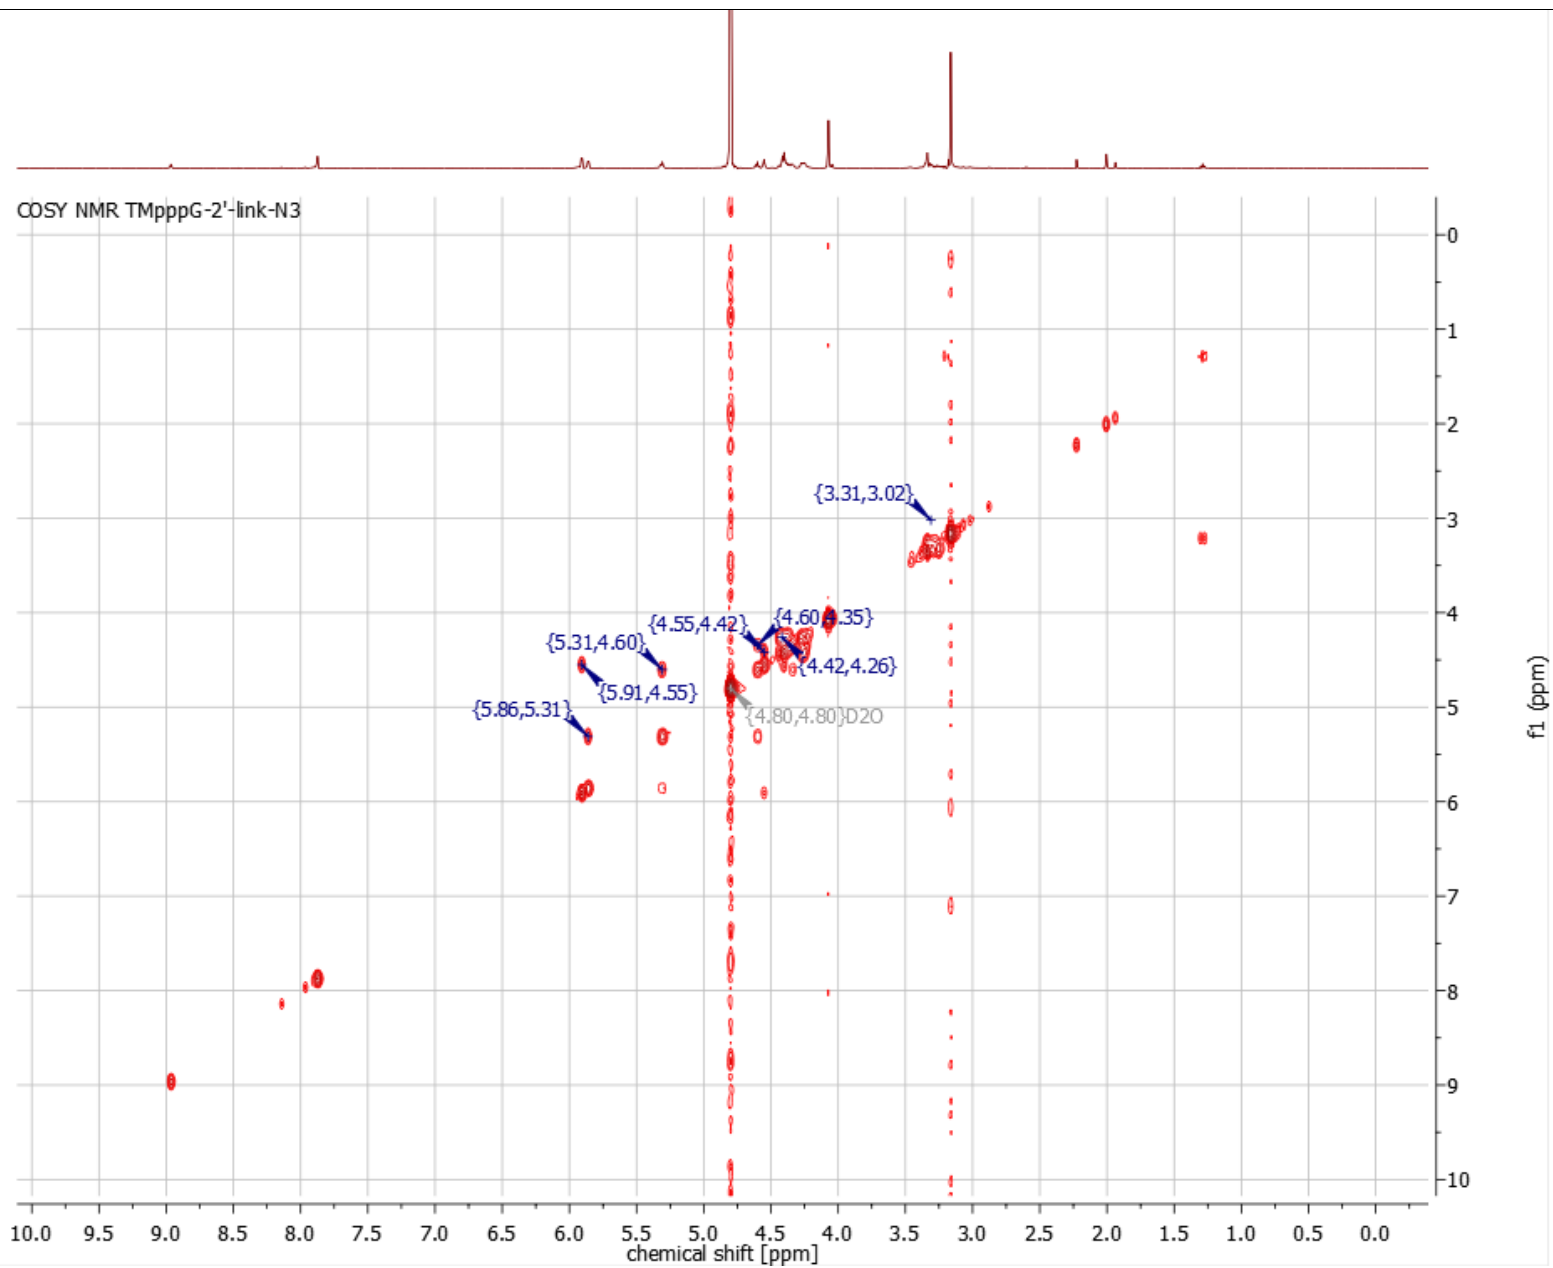

$^{31}\text{P}$  NMR (203 MHz,  $\text{D}_2\text{O}$ ,  $\text{H}_3\text{PO}_4$ ,  $25^\circ\text{C}$ )

$^{31}\text{P}$  NMR TMpppG-2'-link-N3

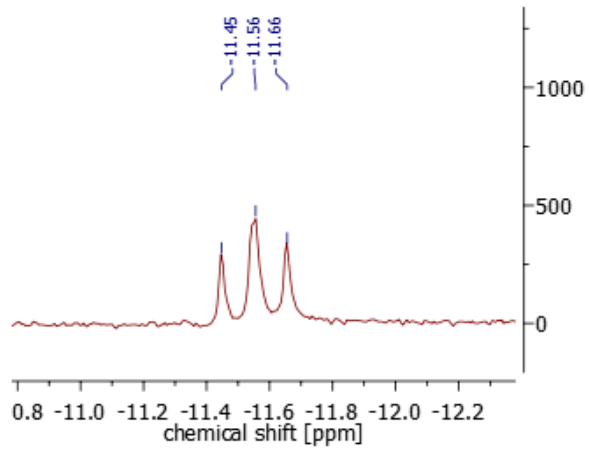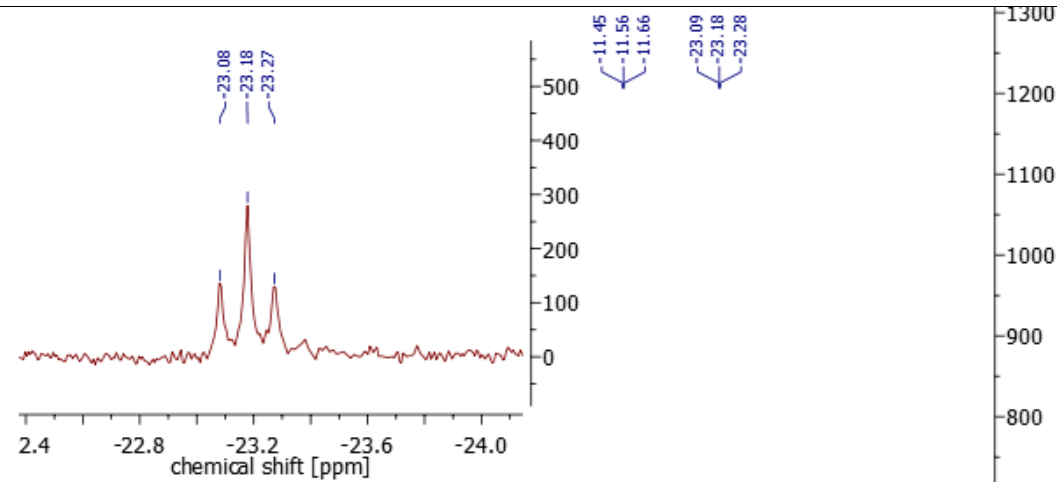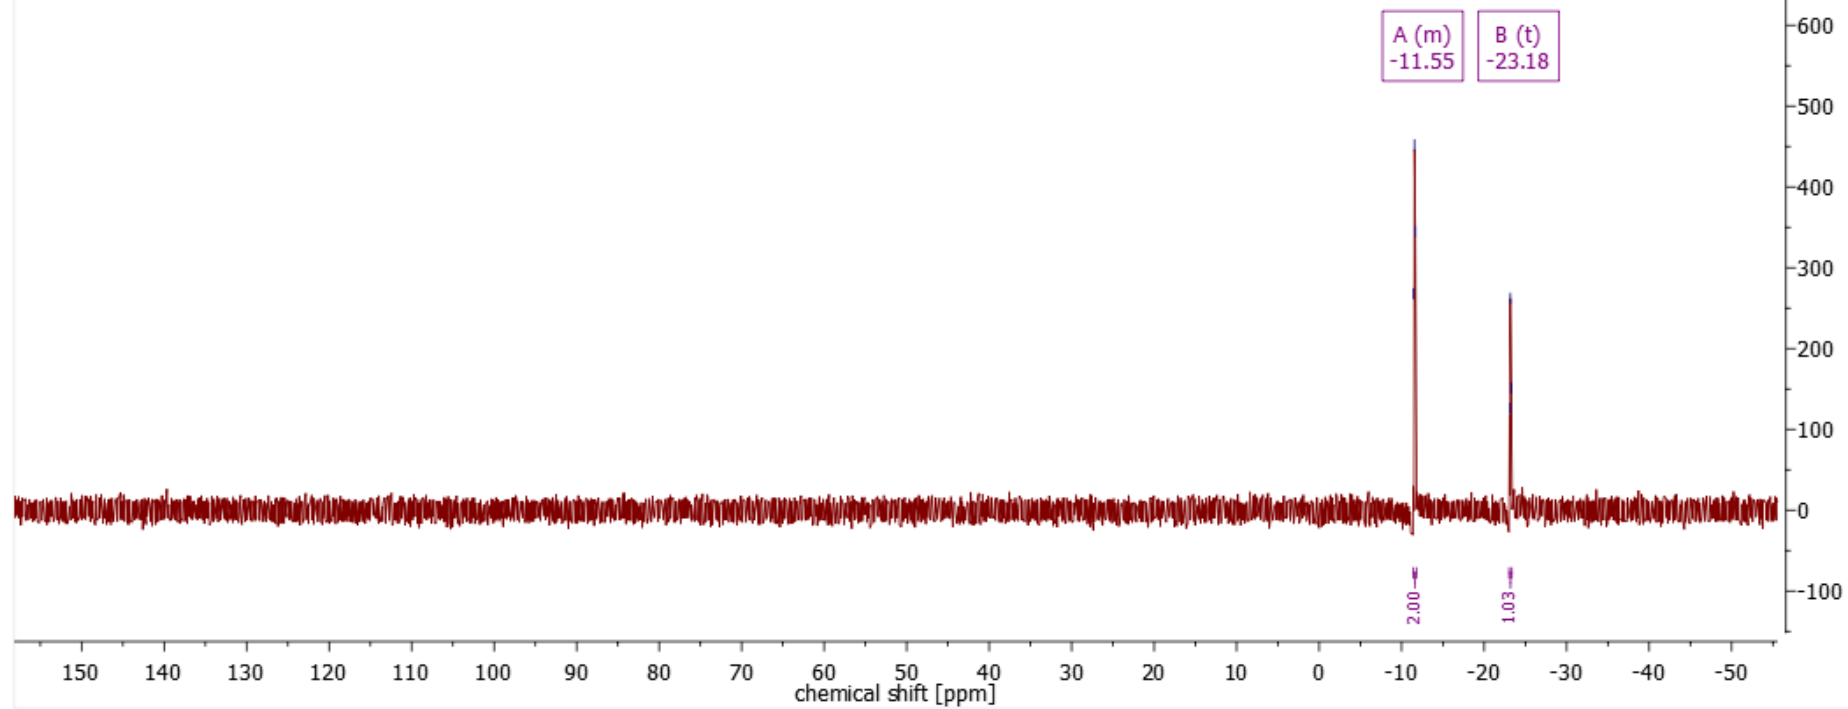

Compound 1-3': TMGpppG-3'-O-C(O)-NH-CH<sub>2</sub>-CH<sub>2</sub>-N<sub>3</sub> (NH<sub>4</sub><sup>+</sup> salt)

Chemical structure

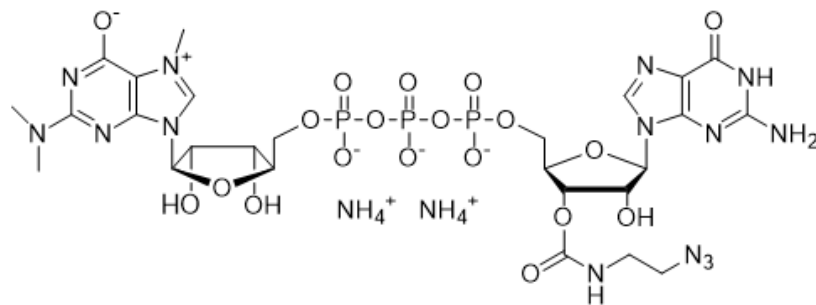

RP-HPLC (conditions c)

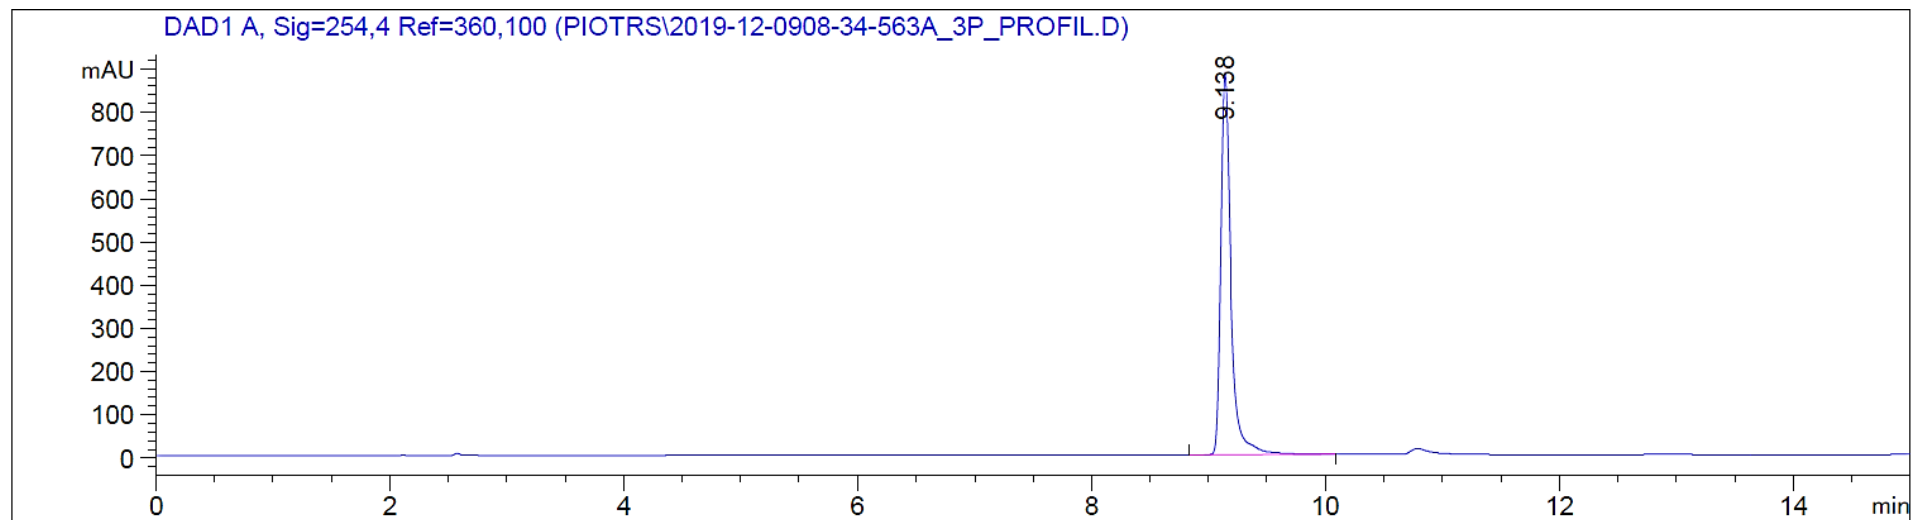

MS (-) ESI (Calc. [M-H]<sup>-</sup> C<sub>26</sub>H<sub>36</sub>N<sub>14</sub>O<sub>19</sub>P<sub>3</sub> : 941.1500, found: 941.15070)

191220\_PSu\_31#6-102 RT: 0.06-0.98 AV: 97 NL: 1.04E7  
T: FTMS - p ESI Full ms [150.0000-2000.0000]

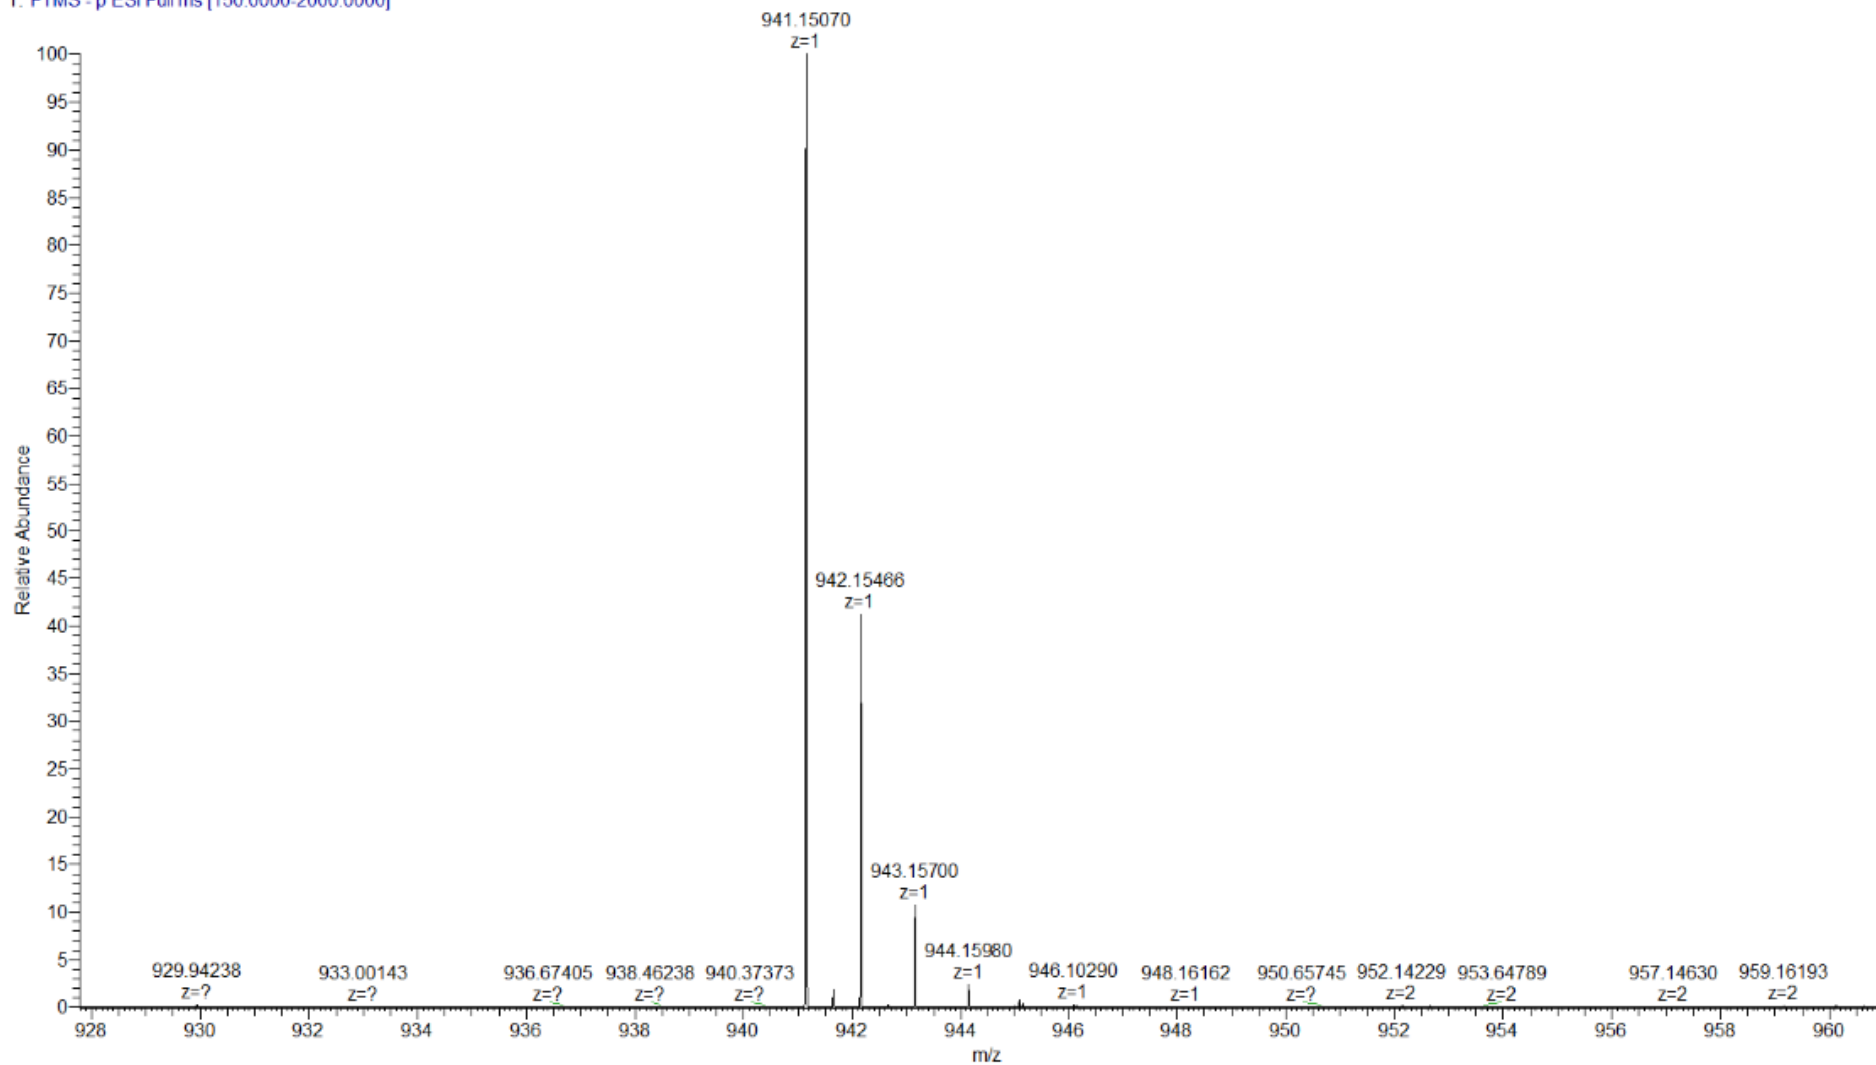

<sup>1</sup>H NMR (400 MHz, D<sub>2</sub>O, 25°C)

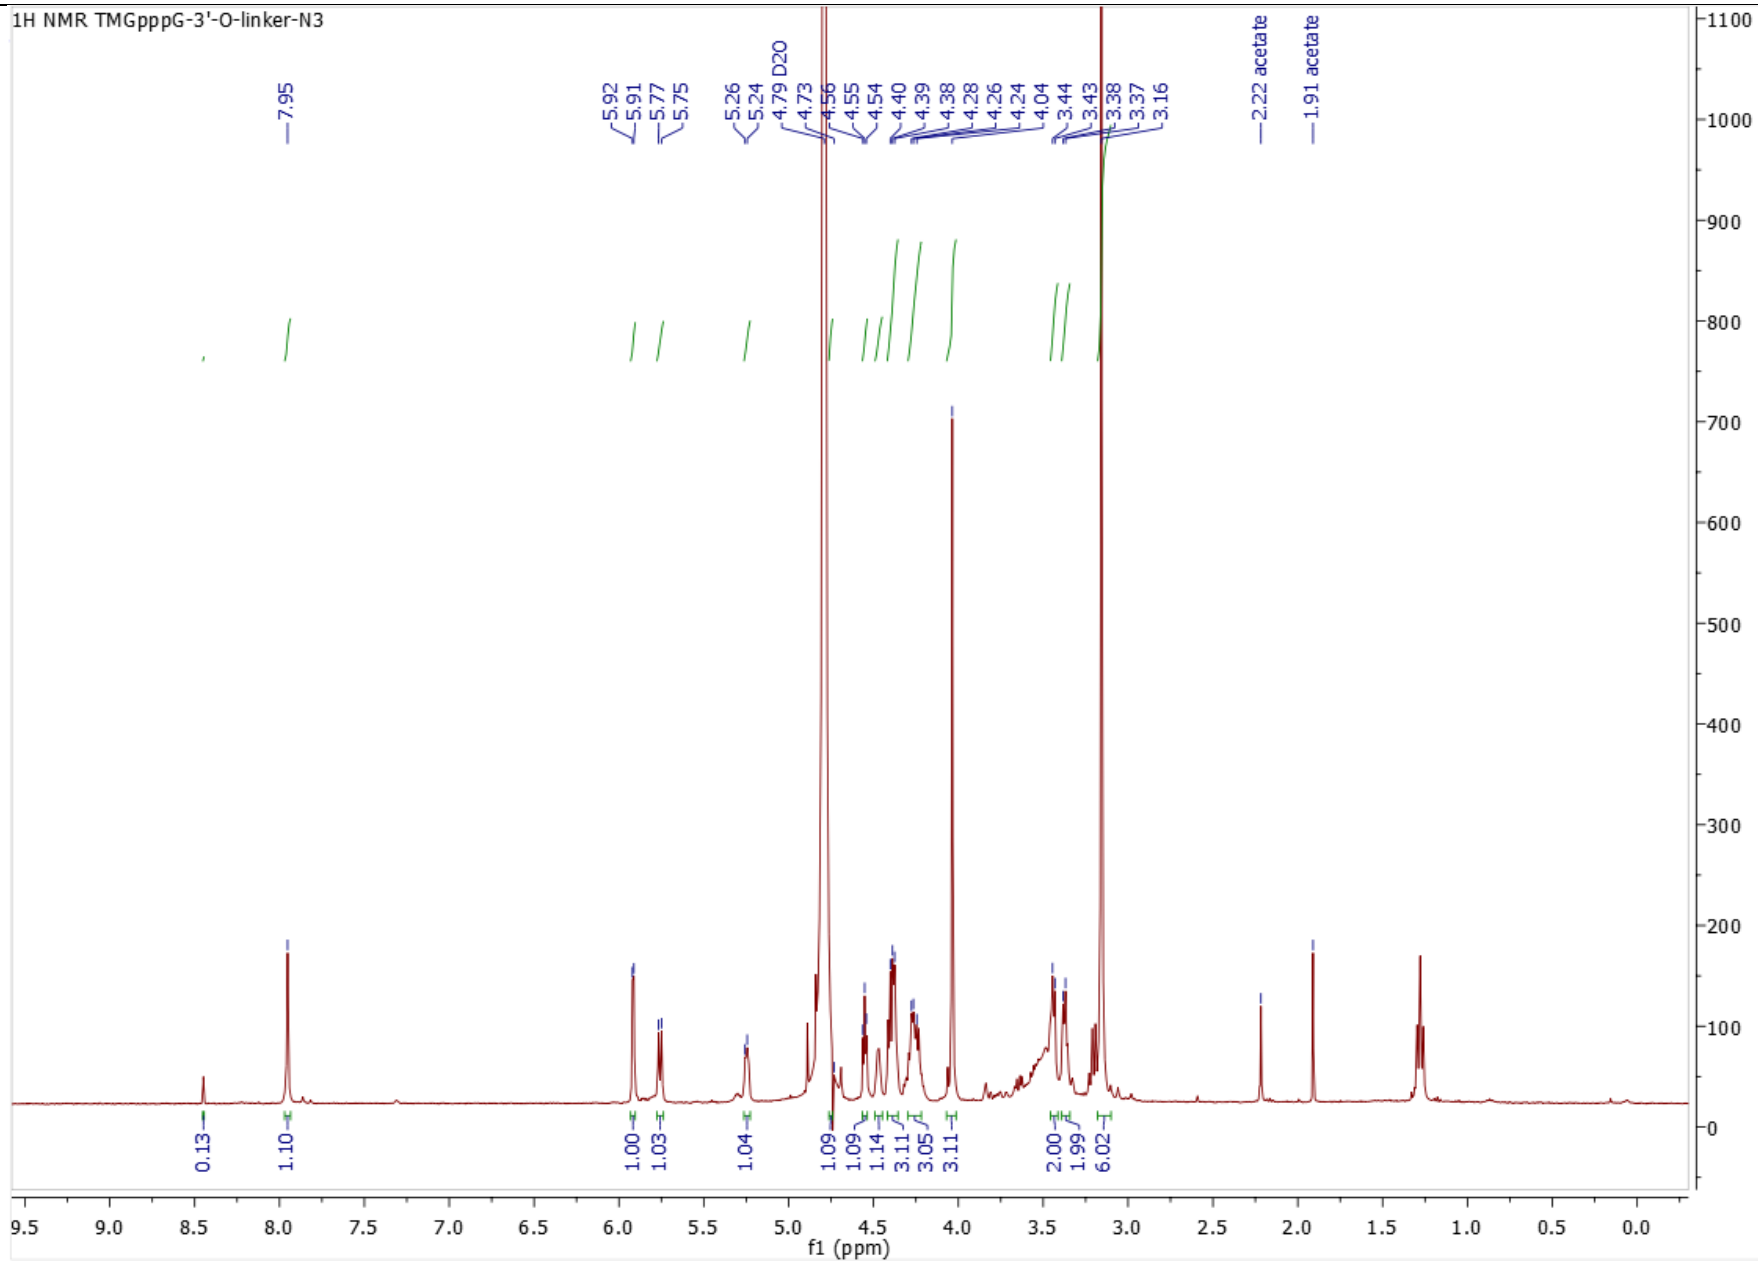



COSY NMR

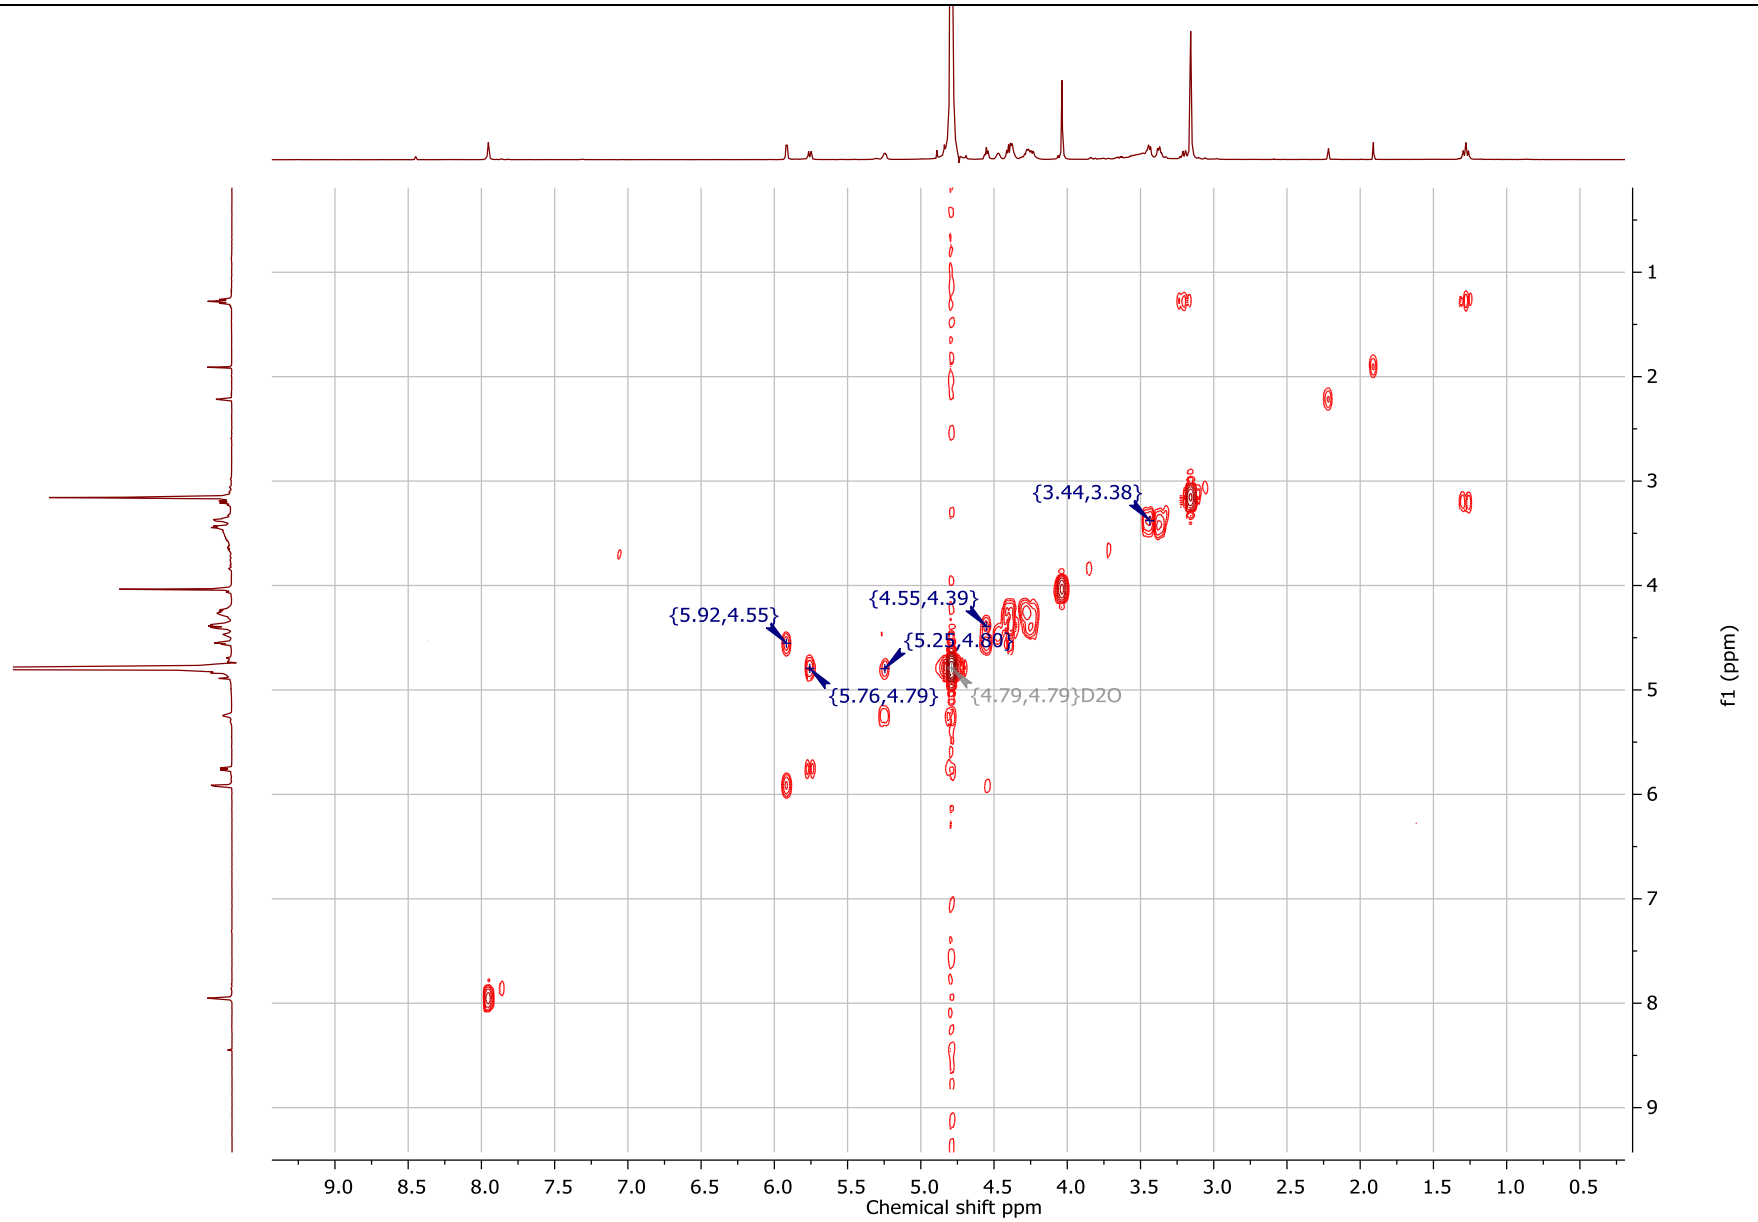

<sup>13</sup>C NMR (400 MHz, D<sub>2</sub>O, 25°C)

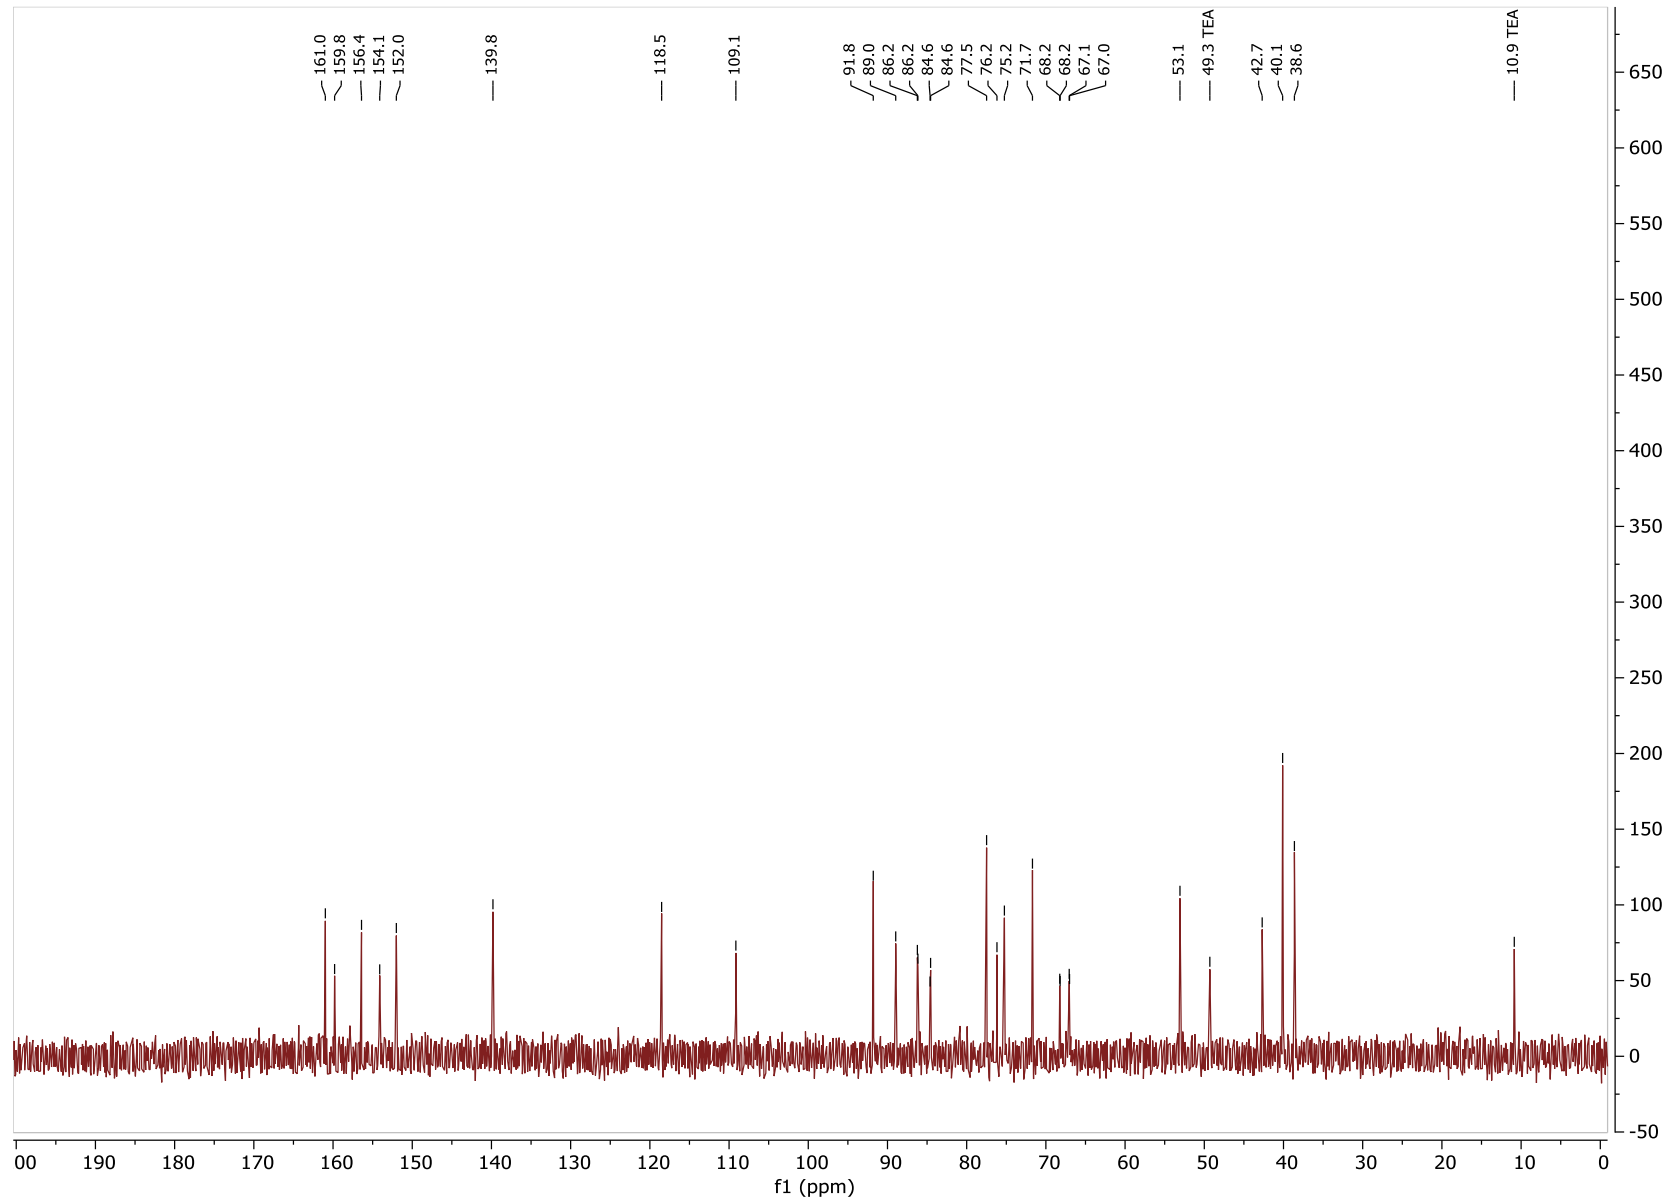

HSQC NMR

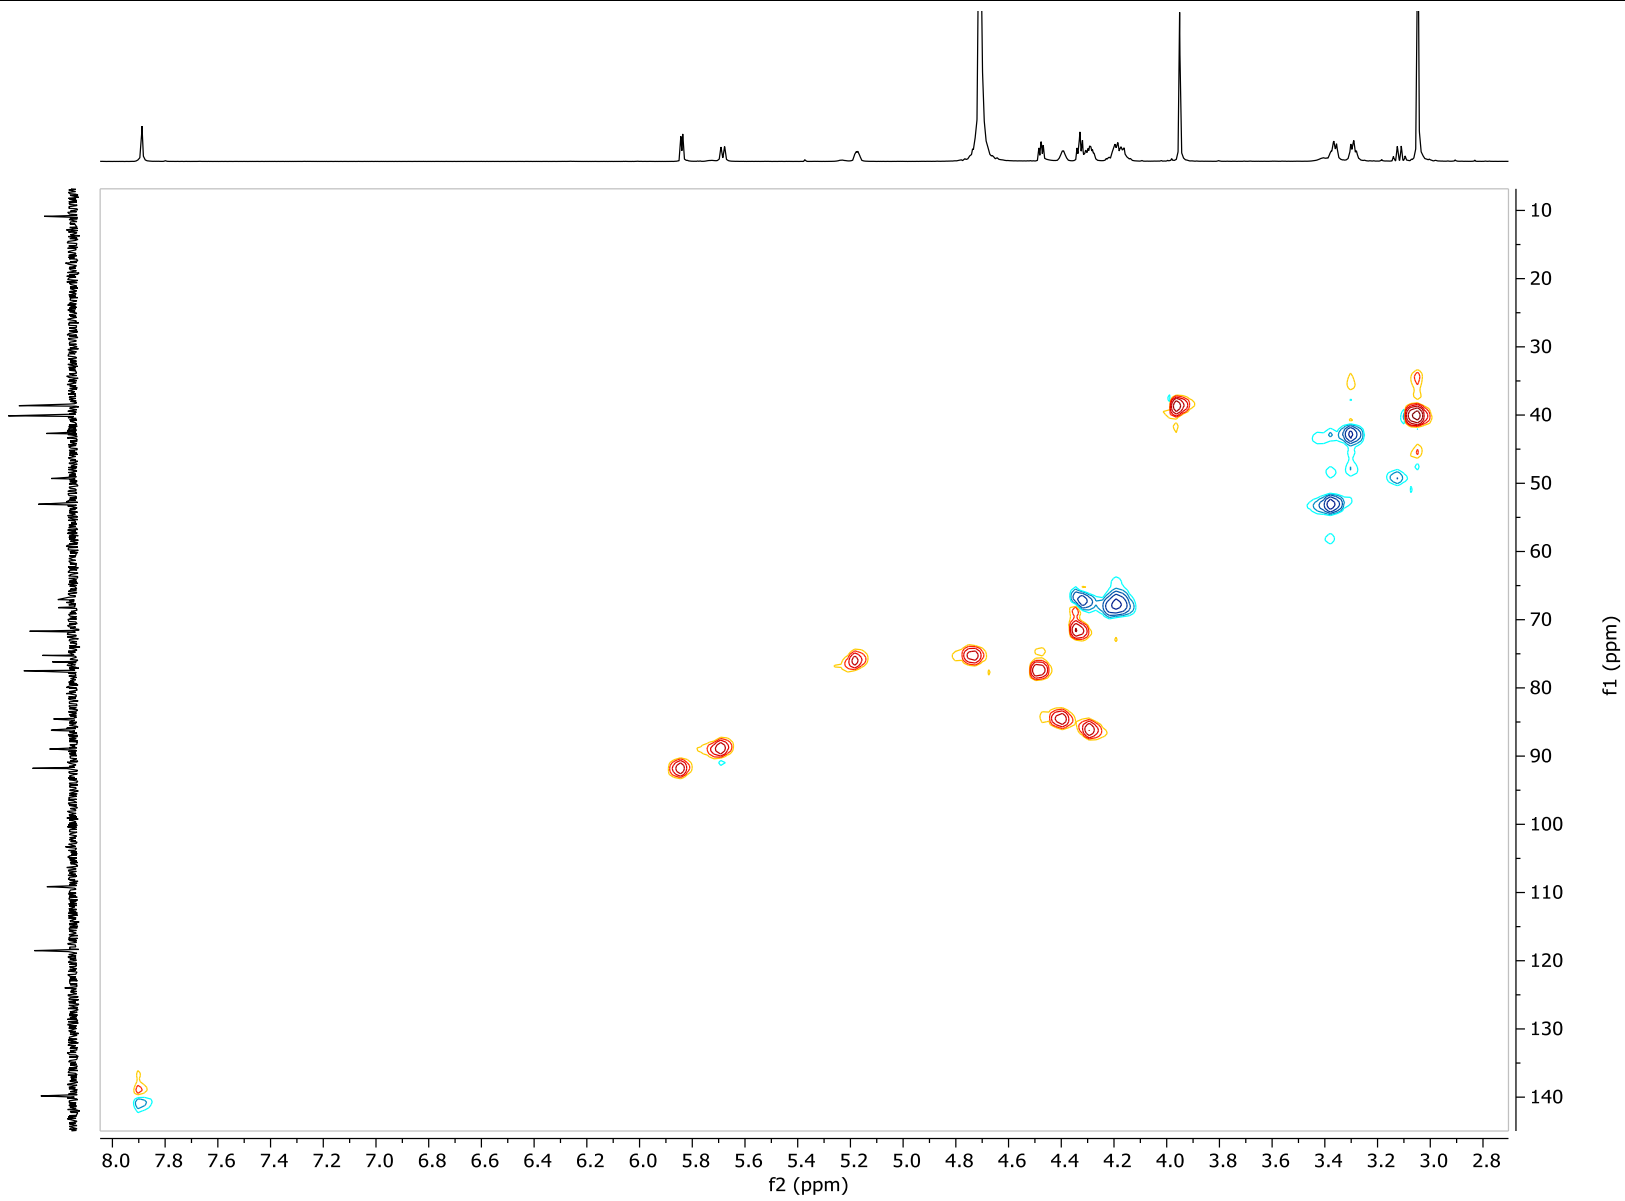

$^{31}\text{P}$  NMR (162 MHz,  $\text{D}_2\text{O}$ ,  $\text{H}_3\text{PO}_4$ ,  $25^\circ\text{C}$ )

$^{31}\text{P}$  NMR izomer 3p

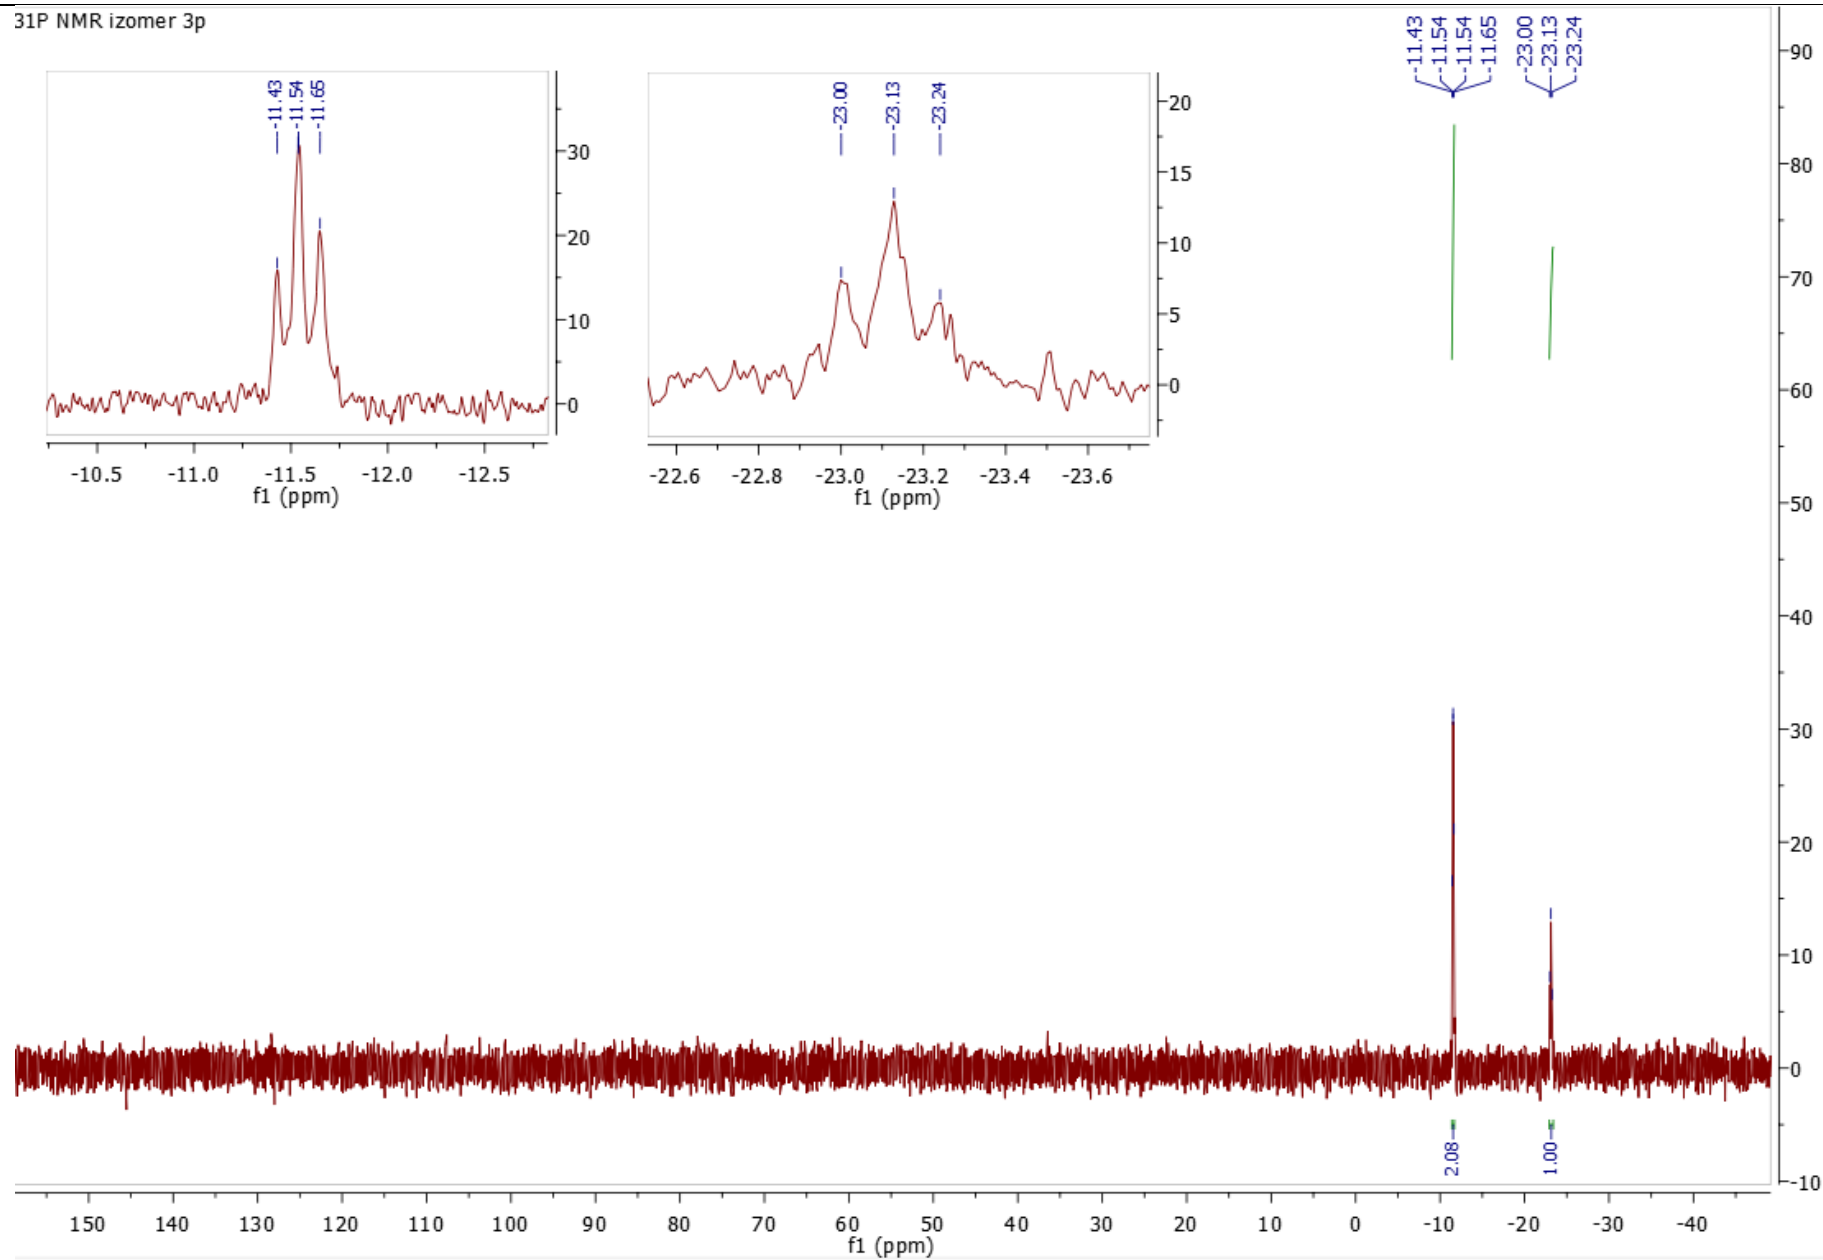

Compound 2-2': TMG-5'-S-pppG-2'-O-C(O)NH-CH<sub>2</sub>CH<sub>2</sub>N<sub>3</sub> (NH<sub>4</sub><sup>+</sup> salt)

Chemical structure

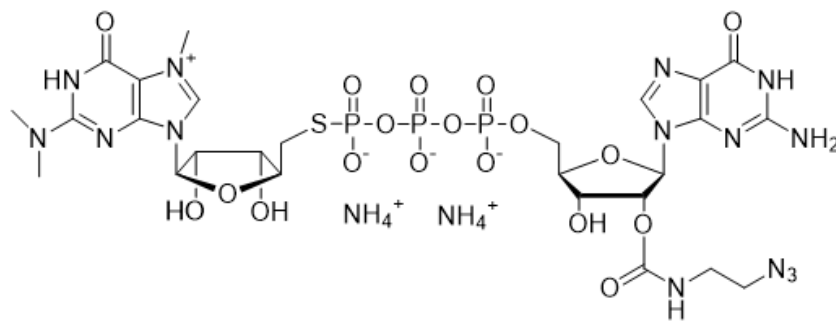

RP-HPLC (conditions c)

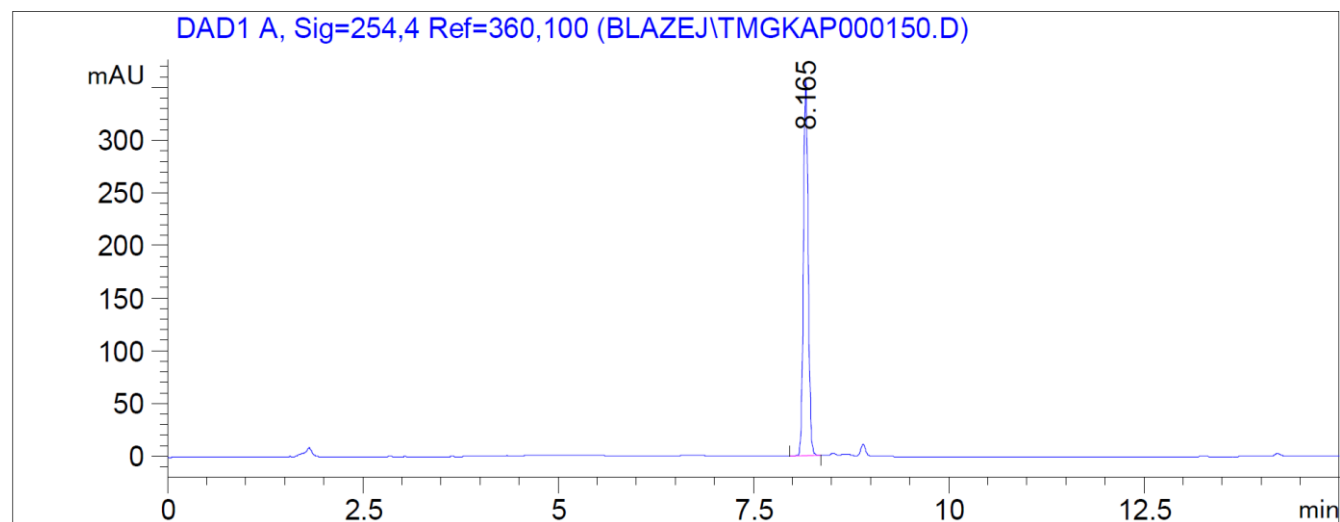

220329\_PSu\_08 #340-467 RT: 2.98-4.09 AV: 128 NL: 6.71E5  
T: FTMS - p ESI Full ms [160.0000-2000.0000]

MS (-) ESI (Calc. [M-H]<sup>-</sup> C<sub>26</sub>H<sub>36</sub>N<sub>14</sub>O<sub>18</sub>P<sub>3</sub>S<sup>-</sup> : 957.1271, found: 957.12924)

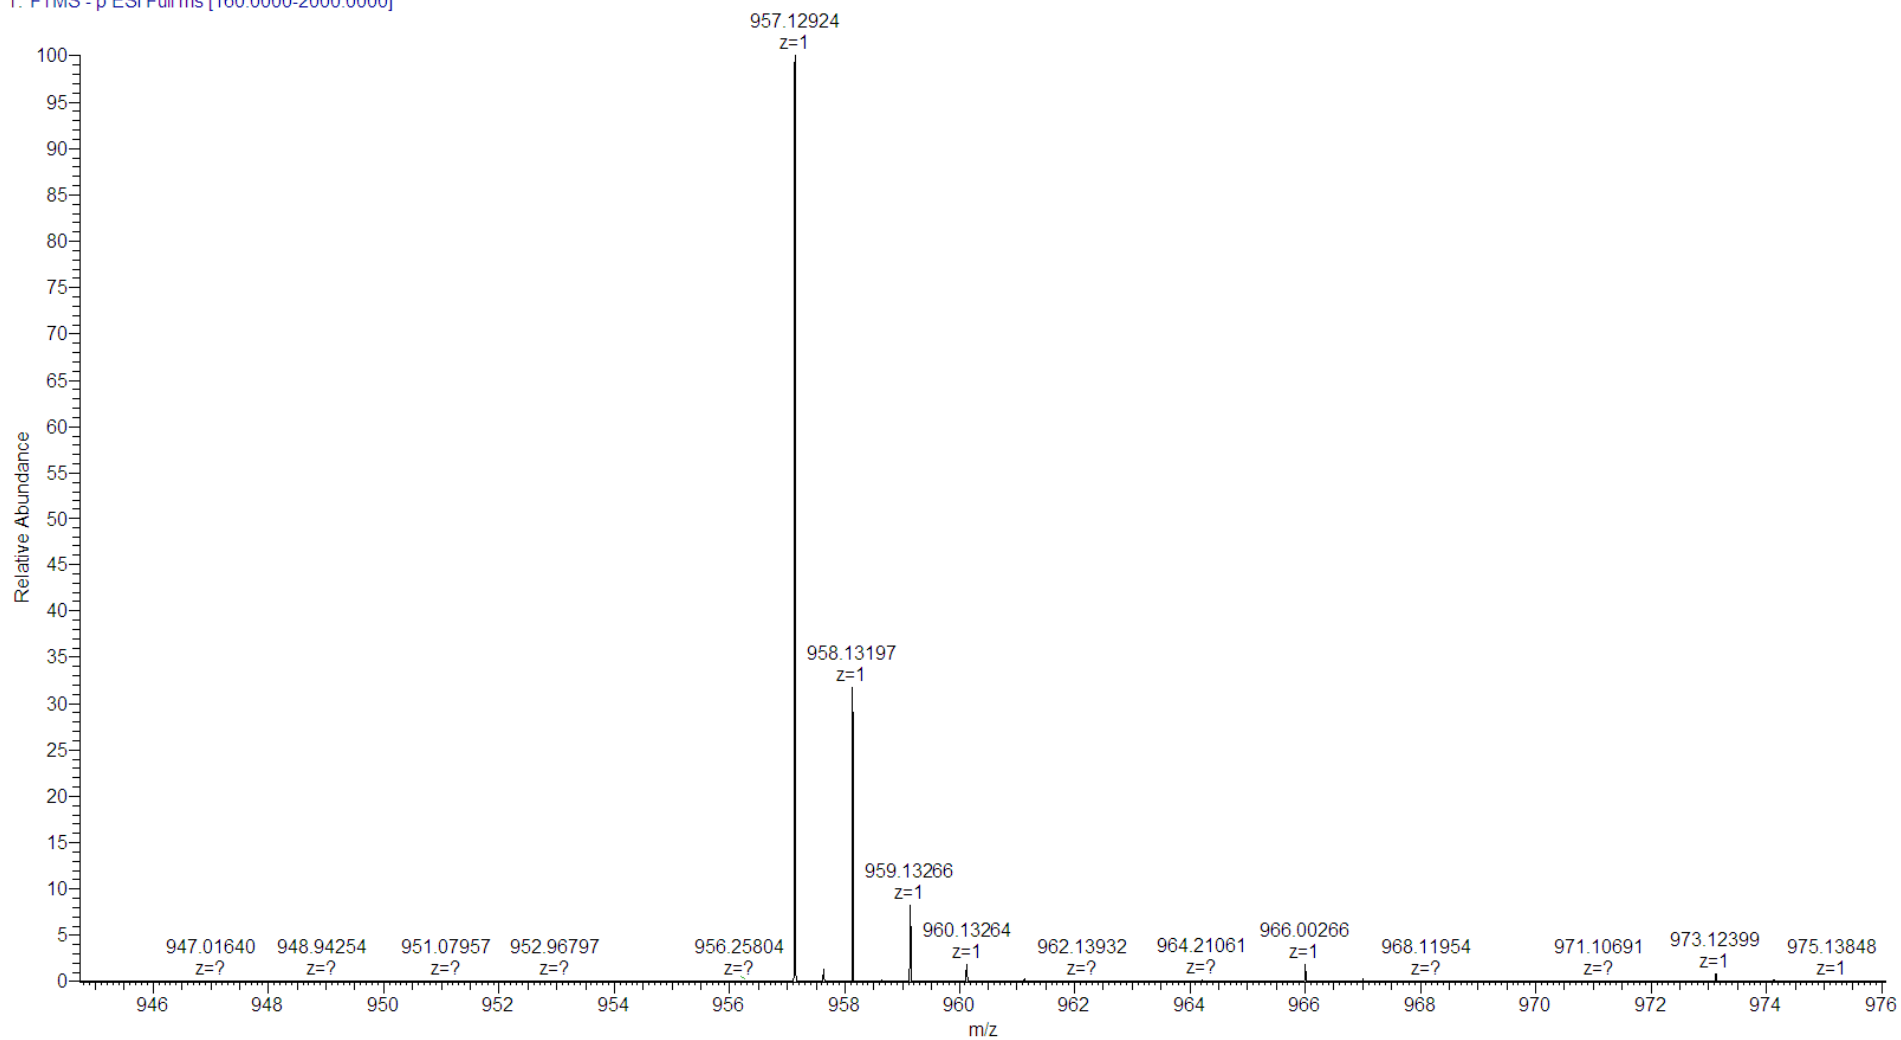

<sup>1</sup>H NMR (500 MHz, D<sub>2</sub>O, 25°C)

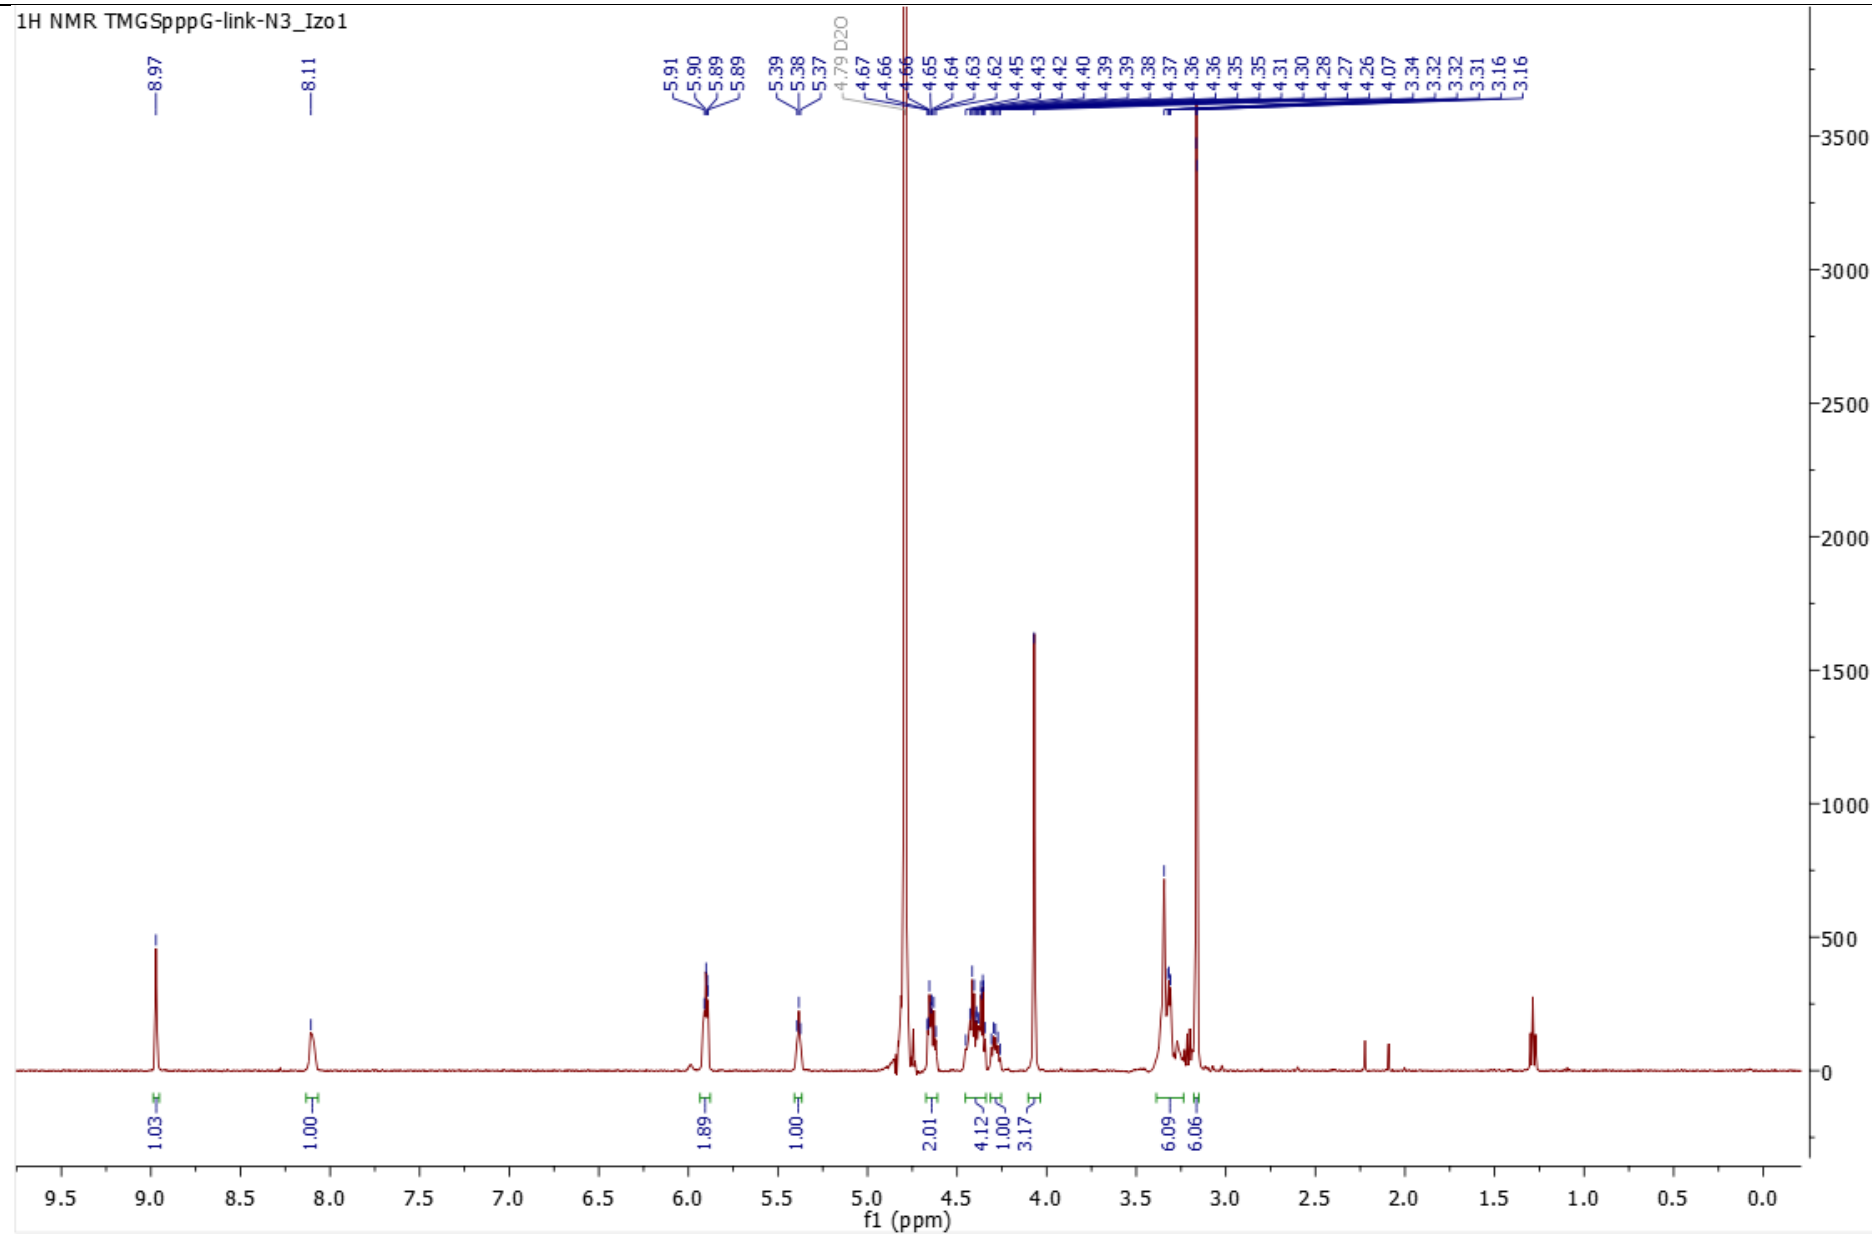

COSY NMR

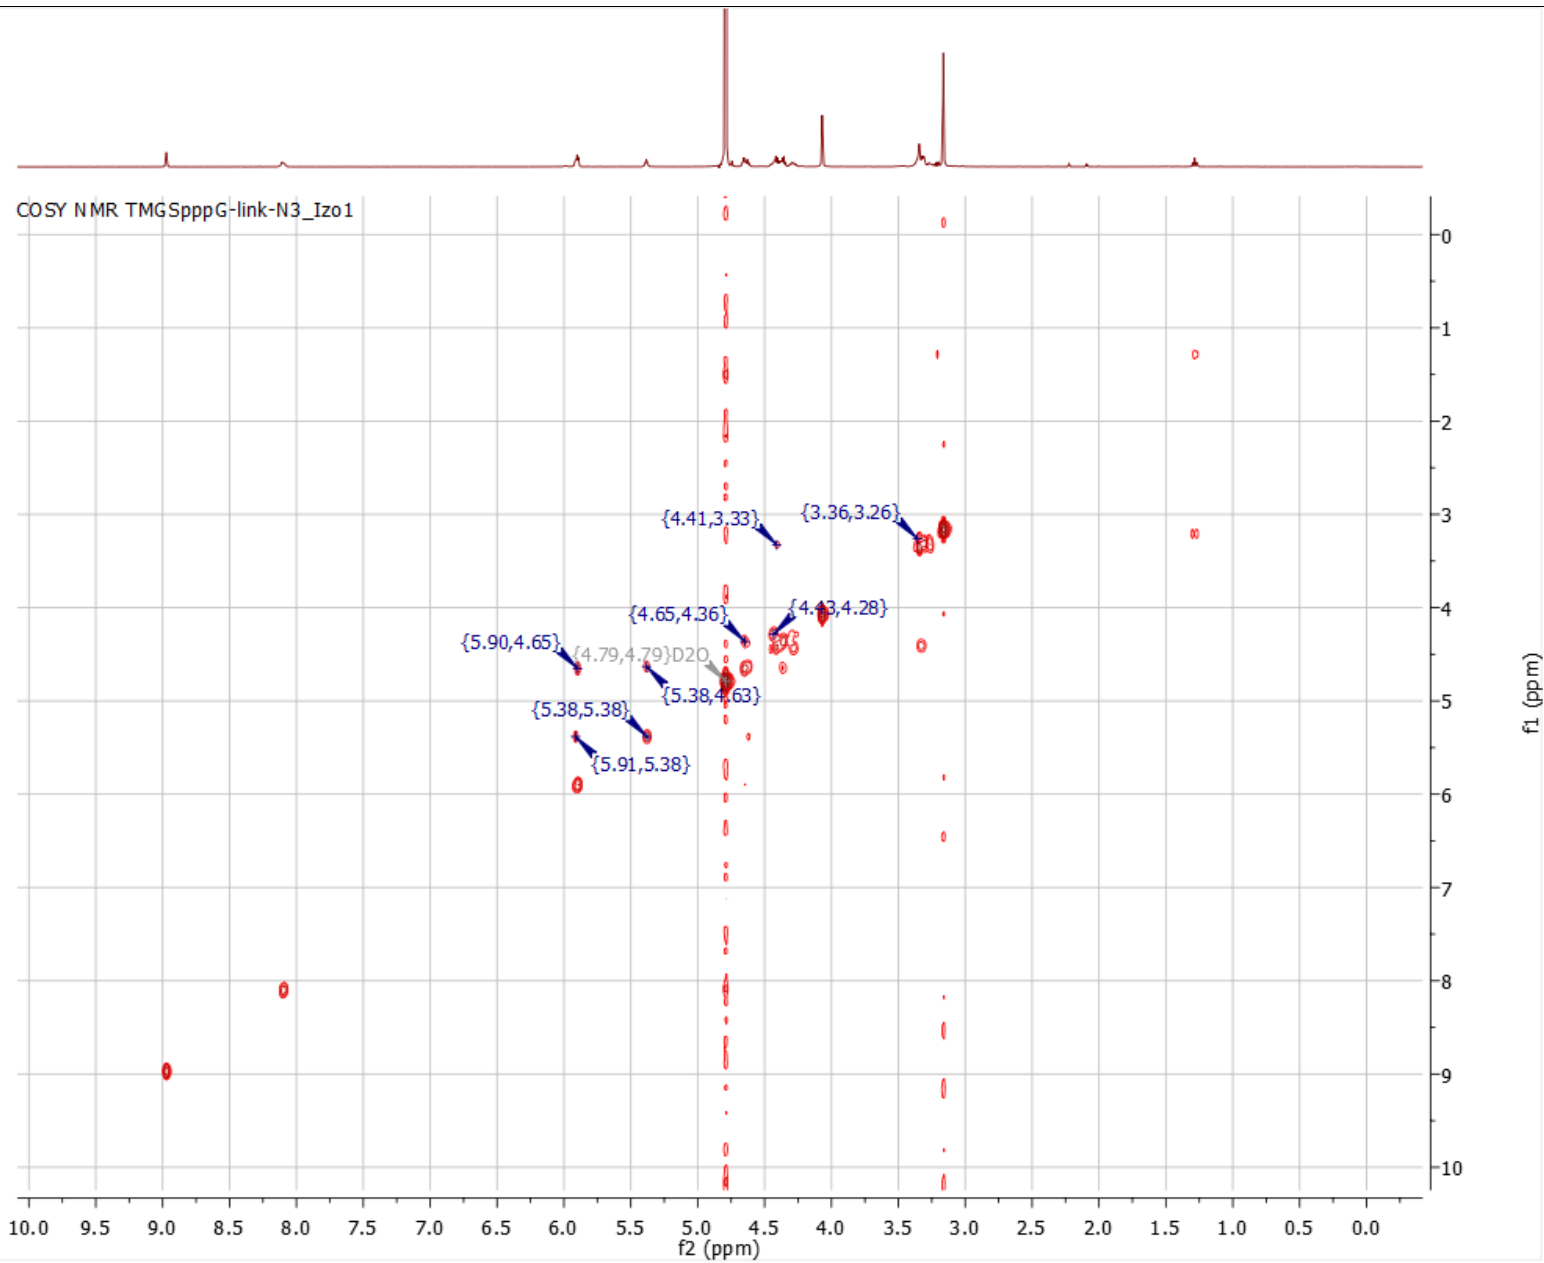



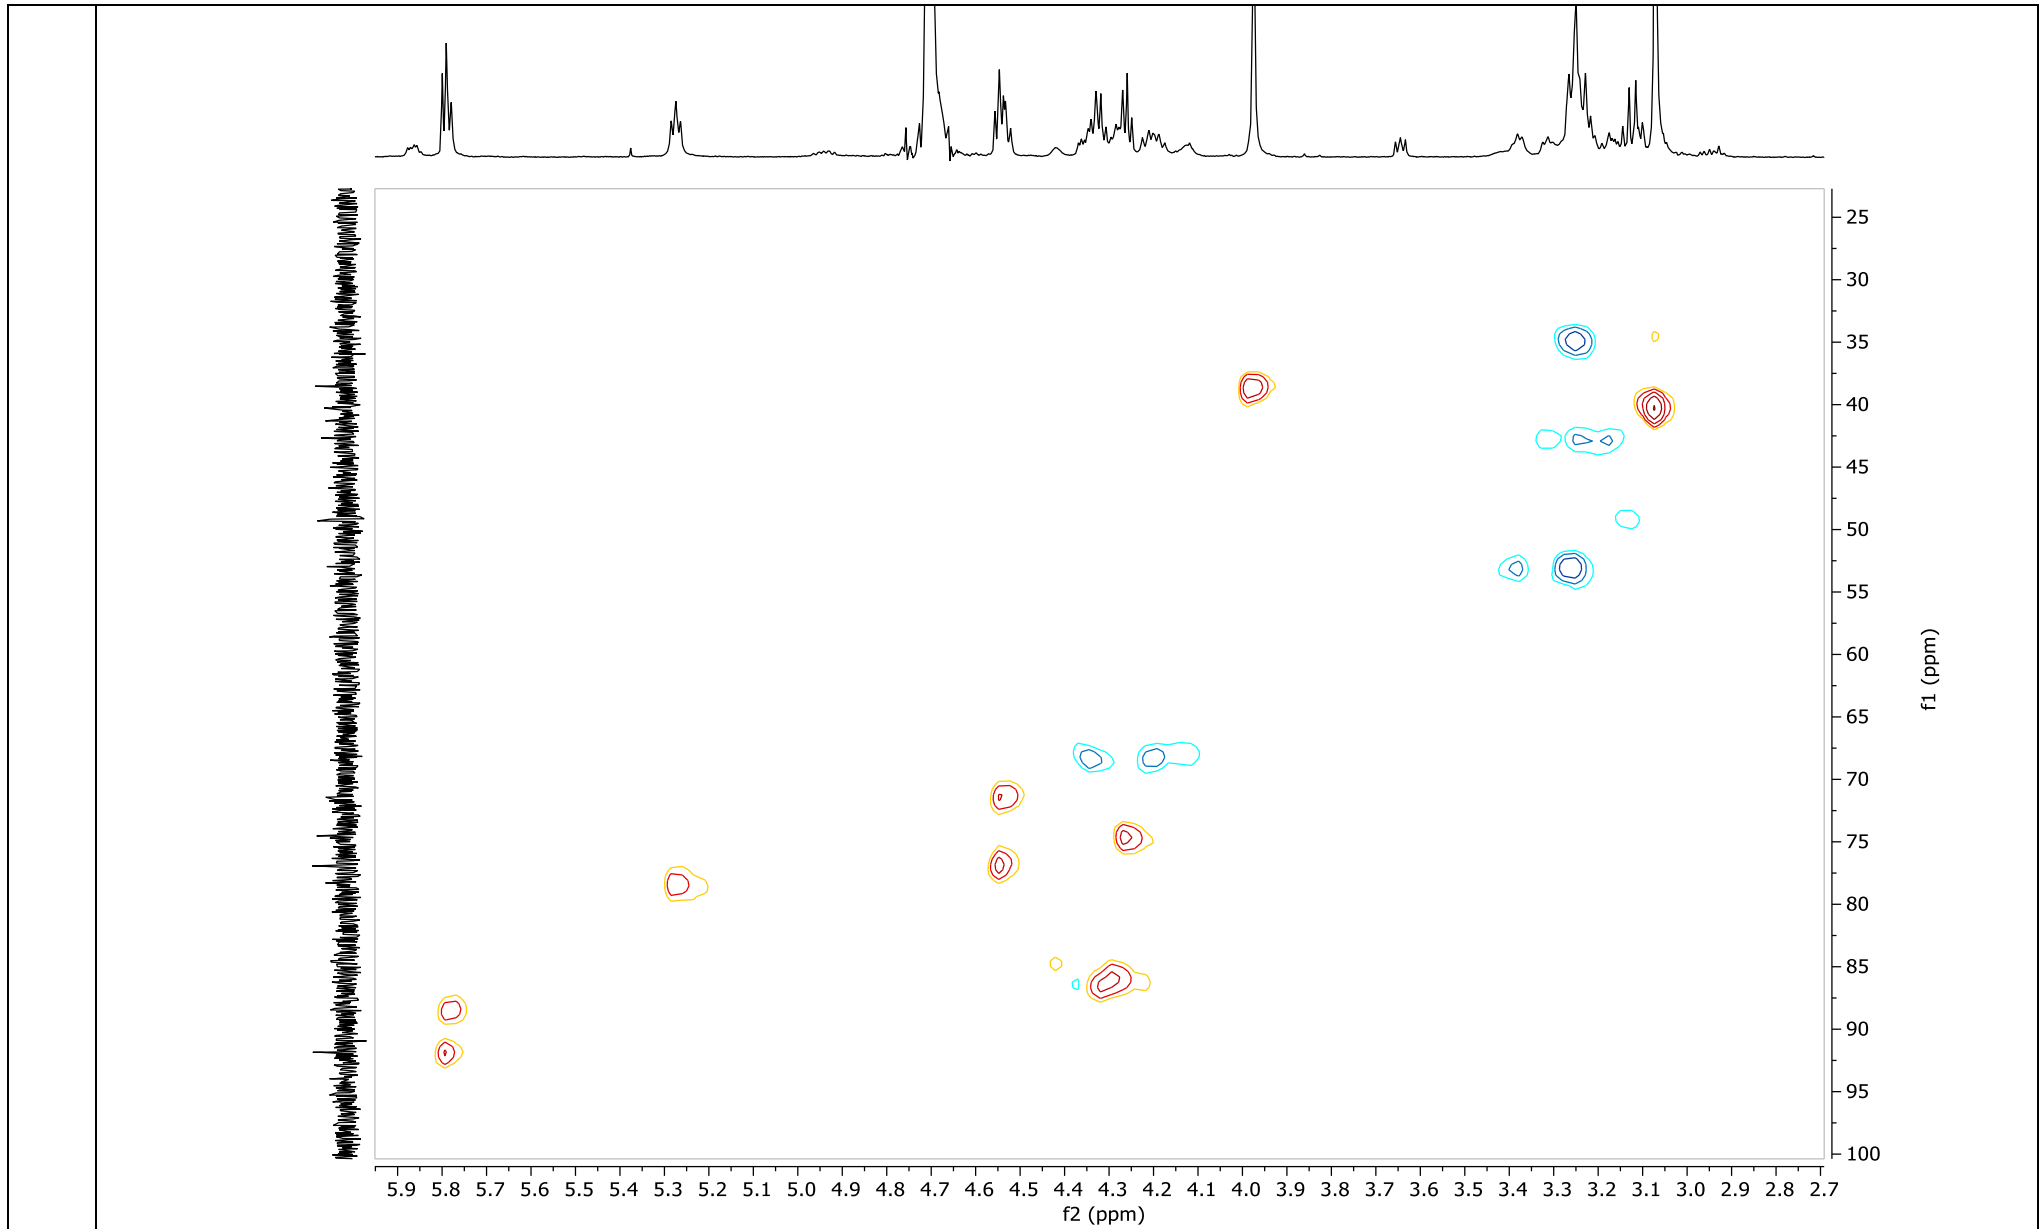

$^{31}\text{P}$  NMR (203 MHz,  $\text{D}_2\text{O}$ ,  $\text{H}_3\text{PO}_4$ ,  $25^\circ\text{C}$ )

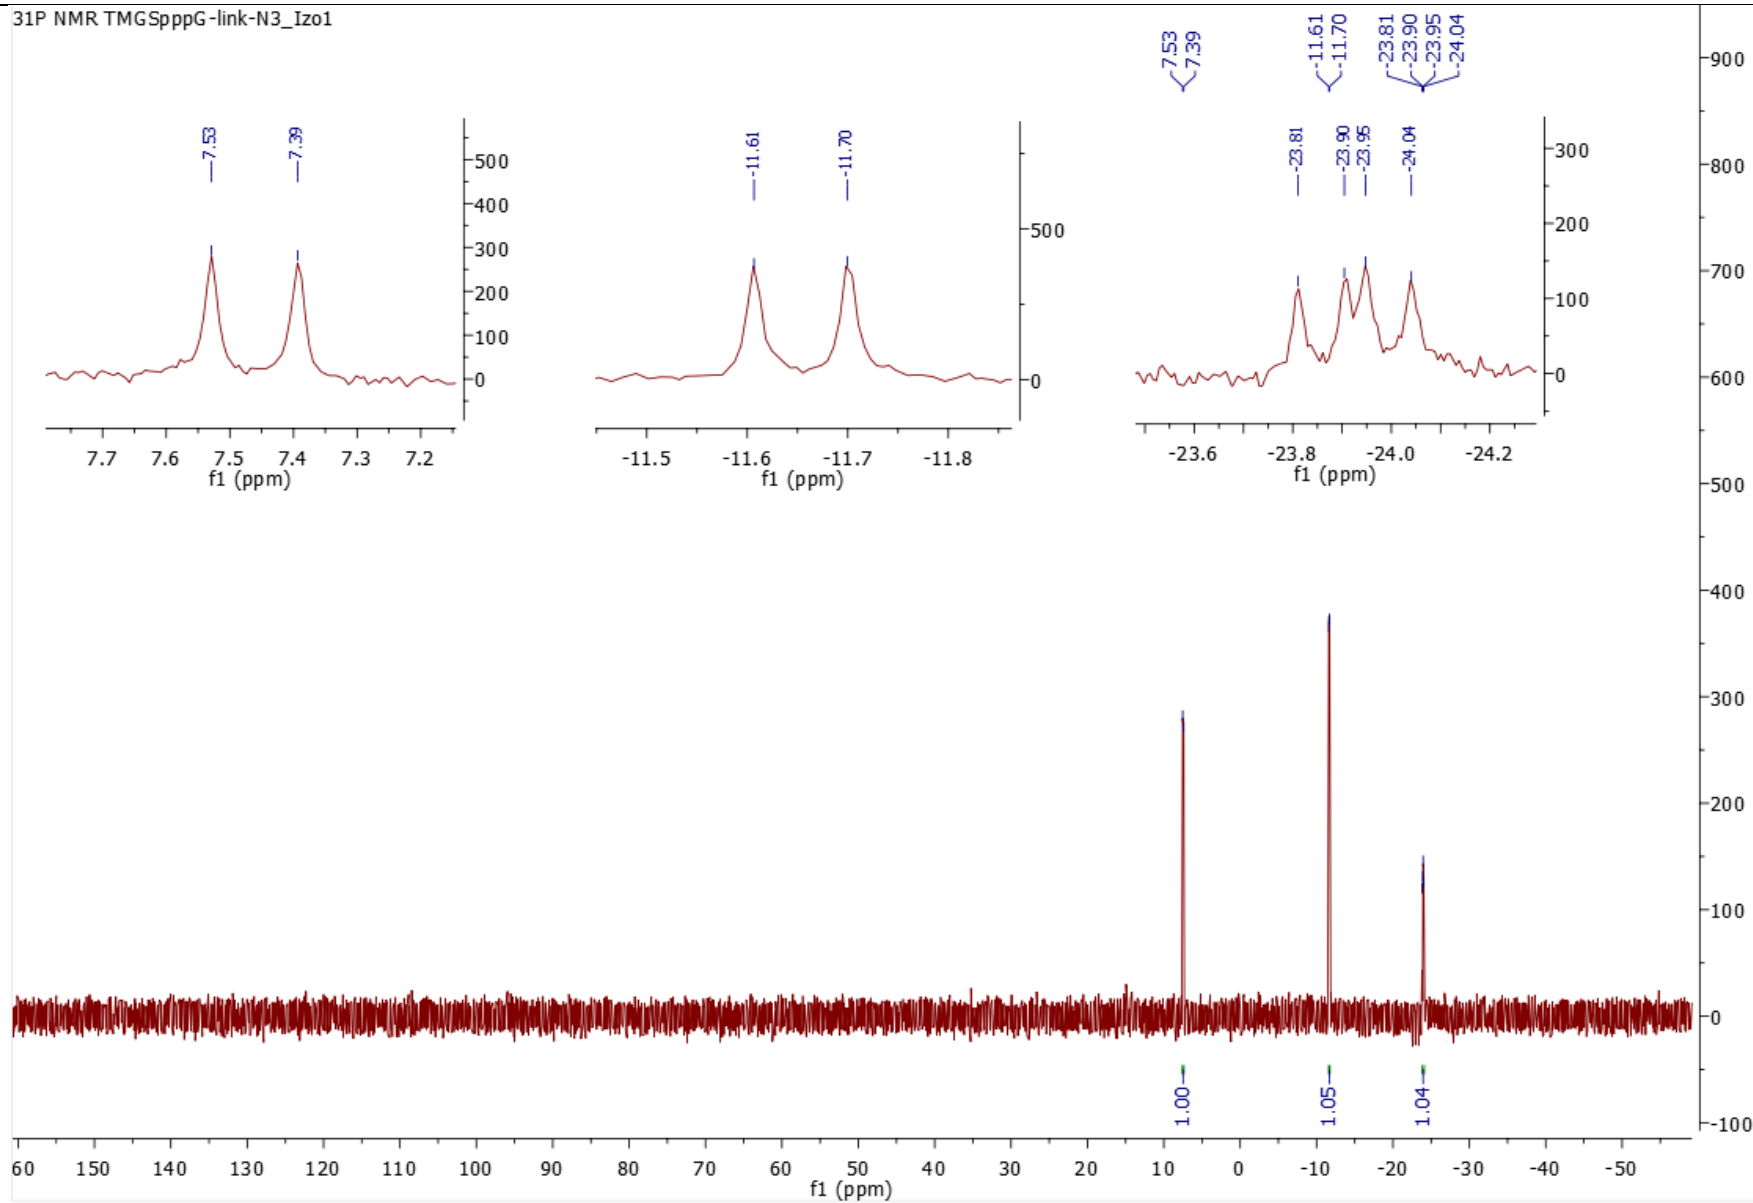

Compound 2-3': TMG-5'-S-pppG-3'-O-C(O)NH-CH<sub>2</sub>CH<sub>2</sub>N<sub>3</sub> (NH<sub>4</sub><sup>+</sup> salt)

Chemical structure

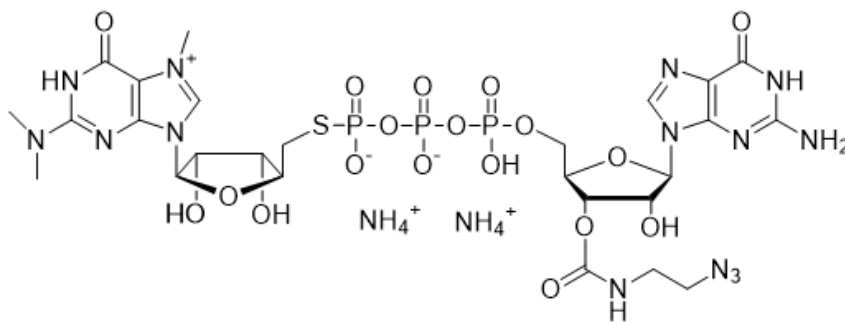

RP-HPLC (conditions c)

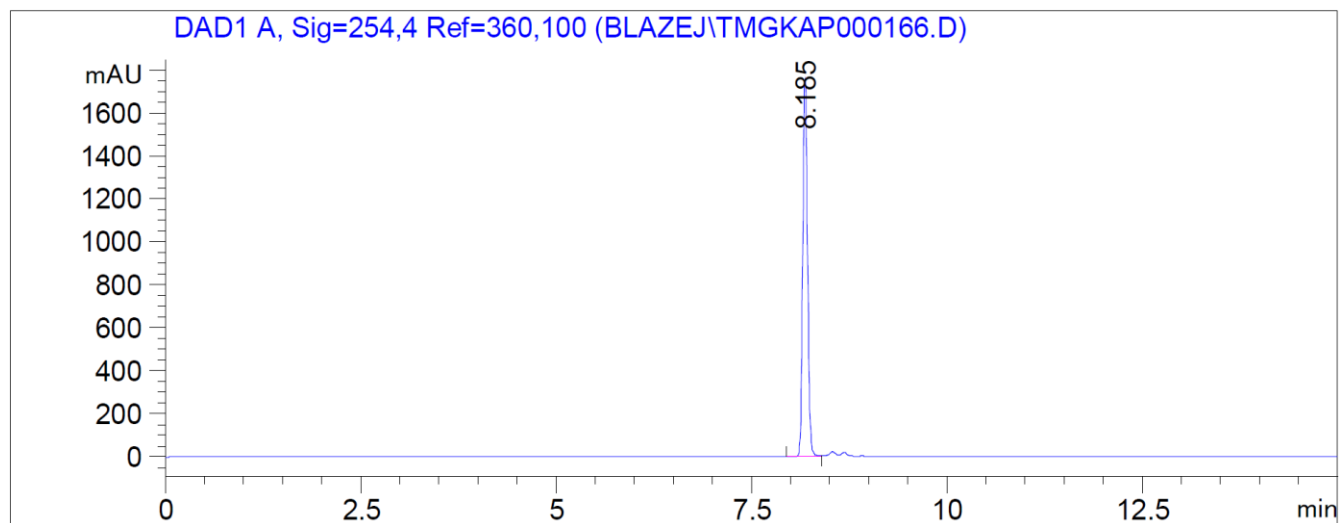

220329\_PSu\_09 #57-133 RT: 0.50-1.16 AV: 77 NL: 2.34E6  
T: FTMS - p ESI Full ms [160.0000-2000.0000]

MS (-) ESI (Calc. [M-H]<sup>-</sup> C<sub>26</sub>H<sub>36</sub>N<sub>14</sub>O<sub>18</sub>P<sub>3</sub>S<sub>3</sub>: 957.1271, found: 957.12874)

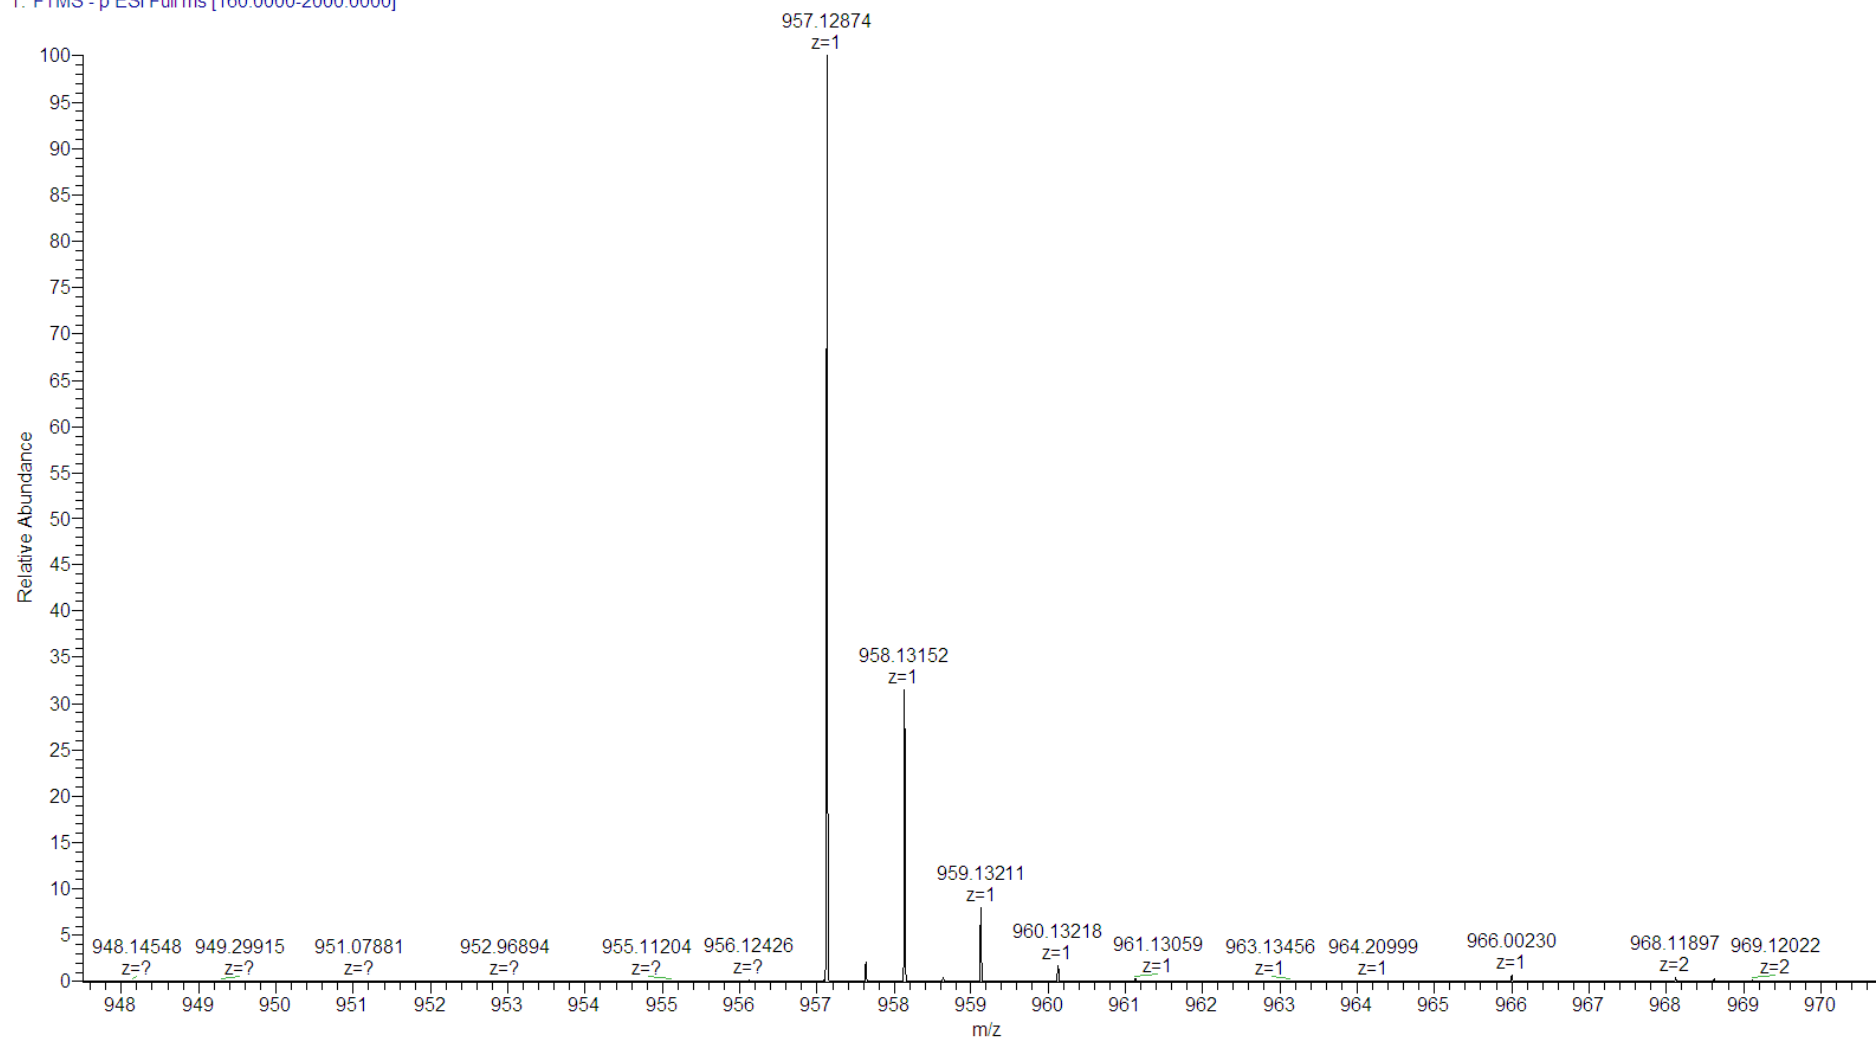

<sup>1</sup>H NMR (500 MHz, D<sub>2</sub>O, 25°C)

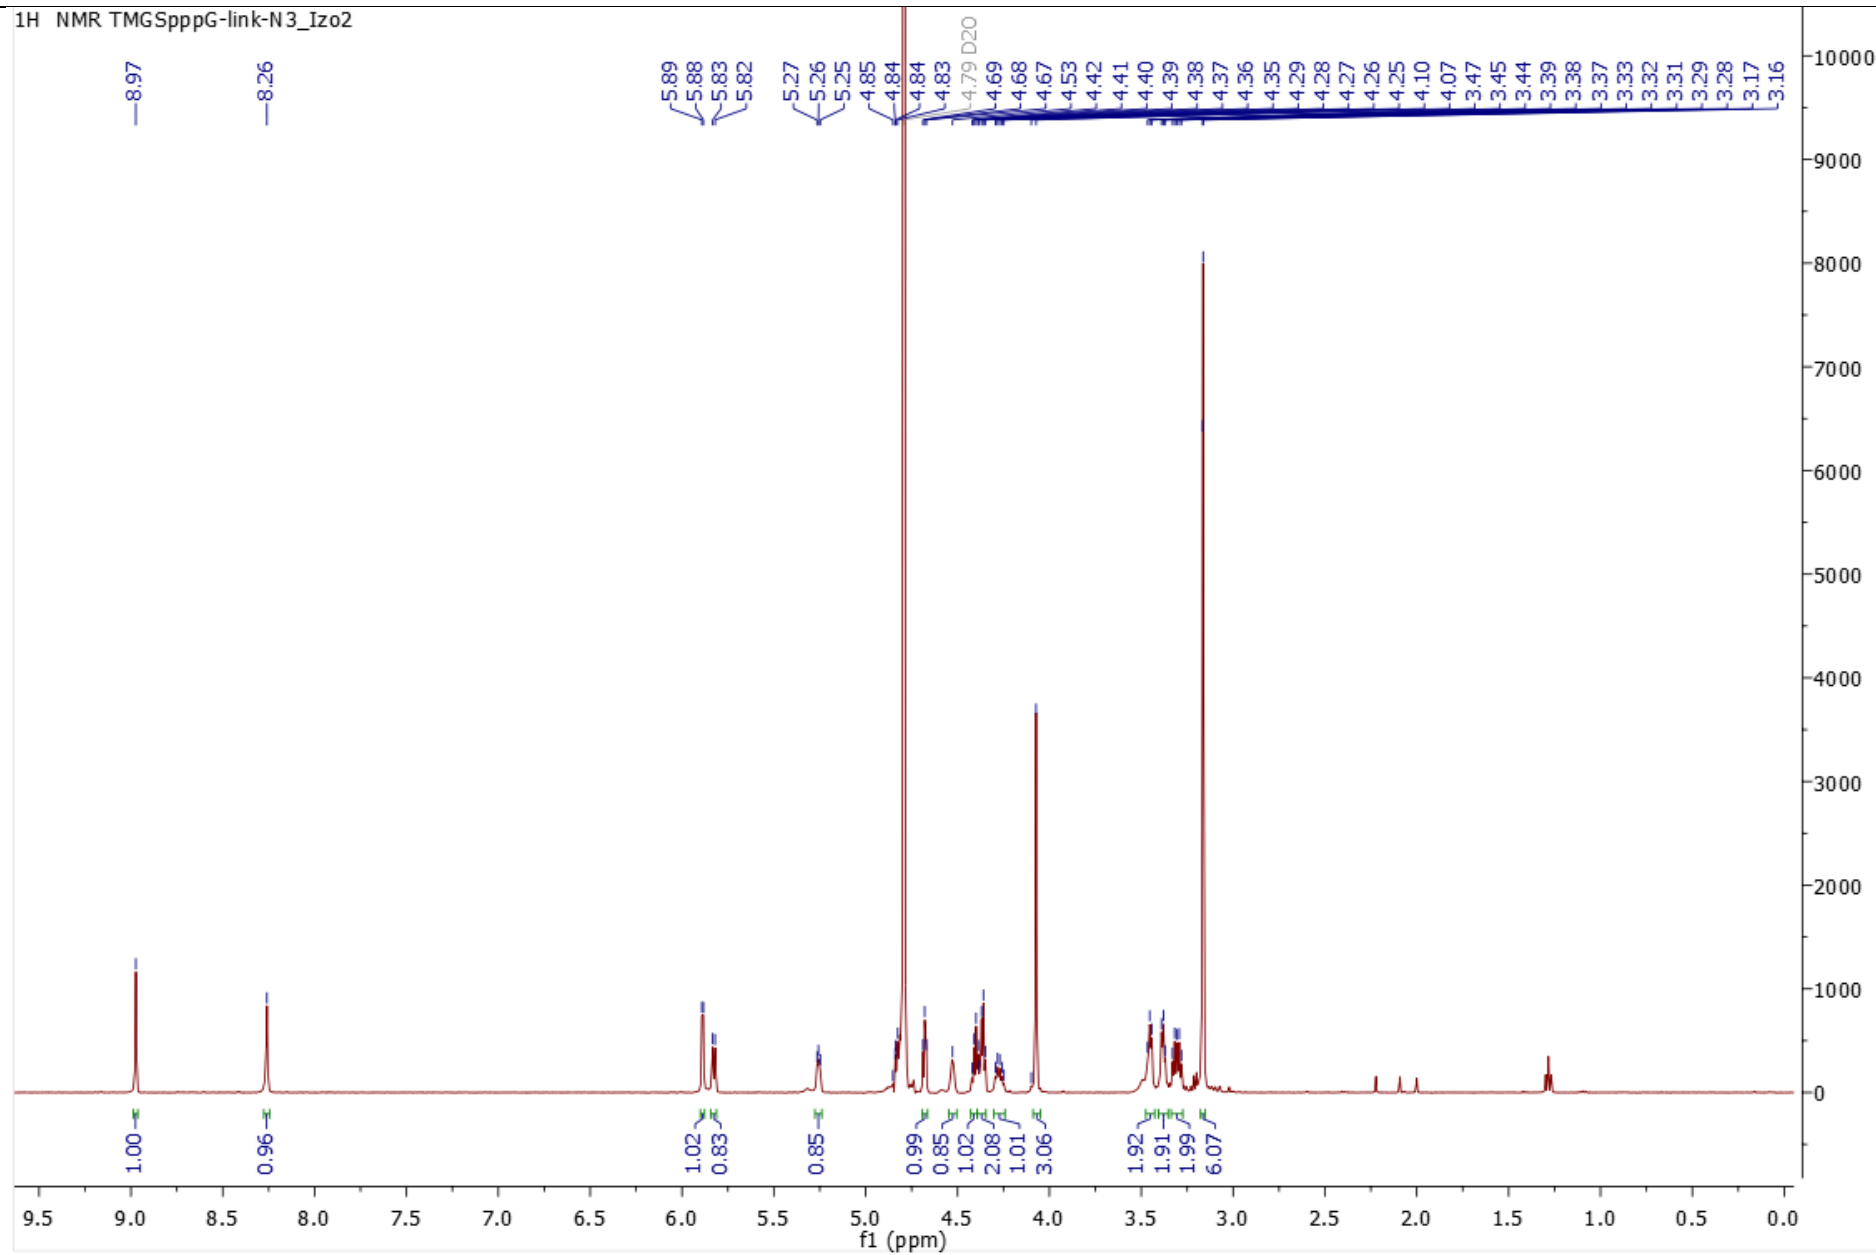

COSY NMR

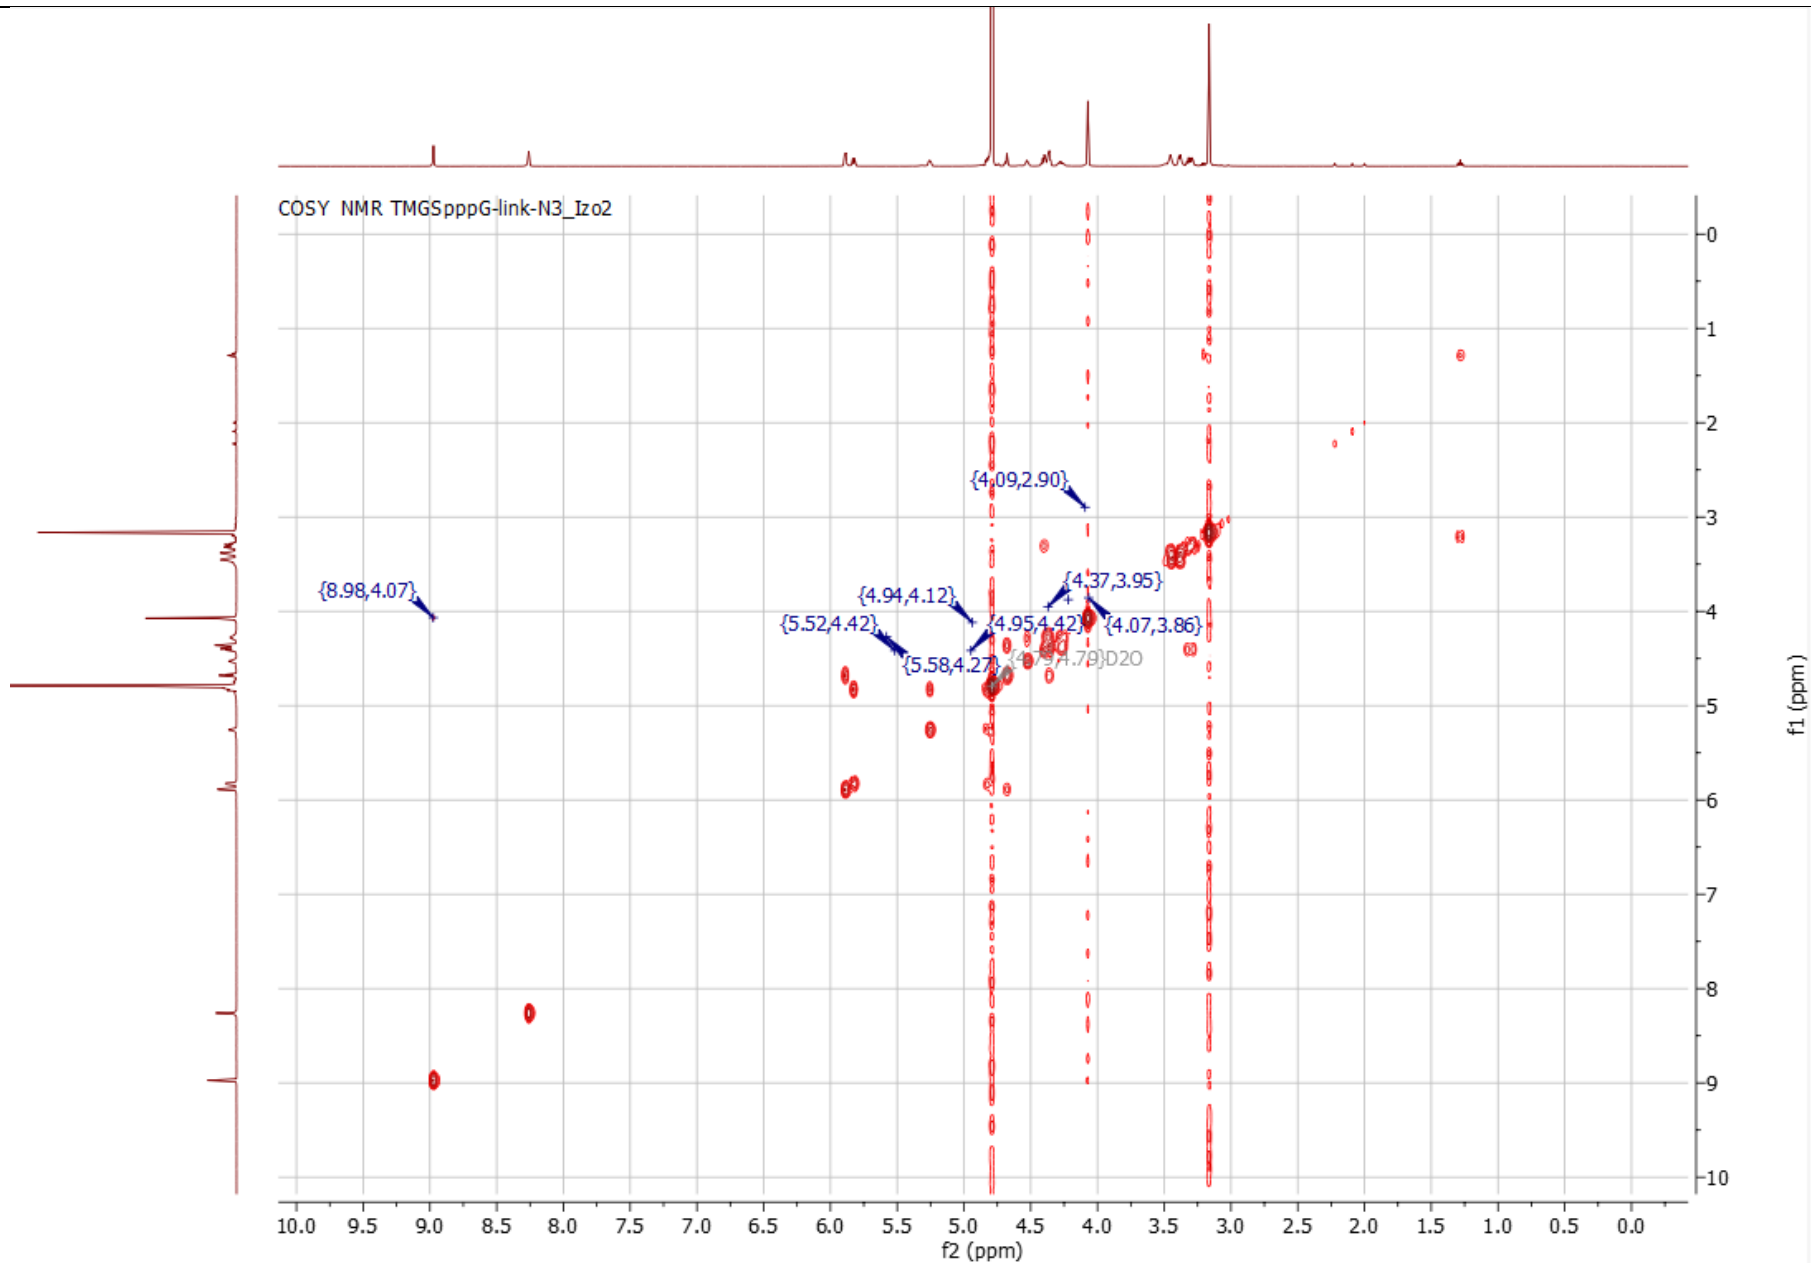

$^{13}\text{C}$  NMR (500 MHz,  $\text{D}_2\text{O}$ ,  $25^\circ\text{C}$ )

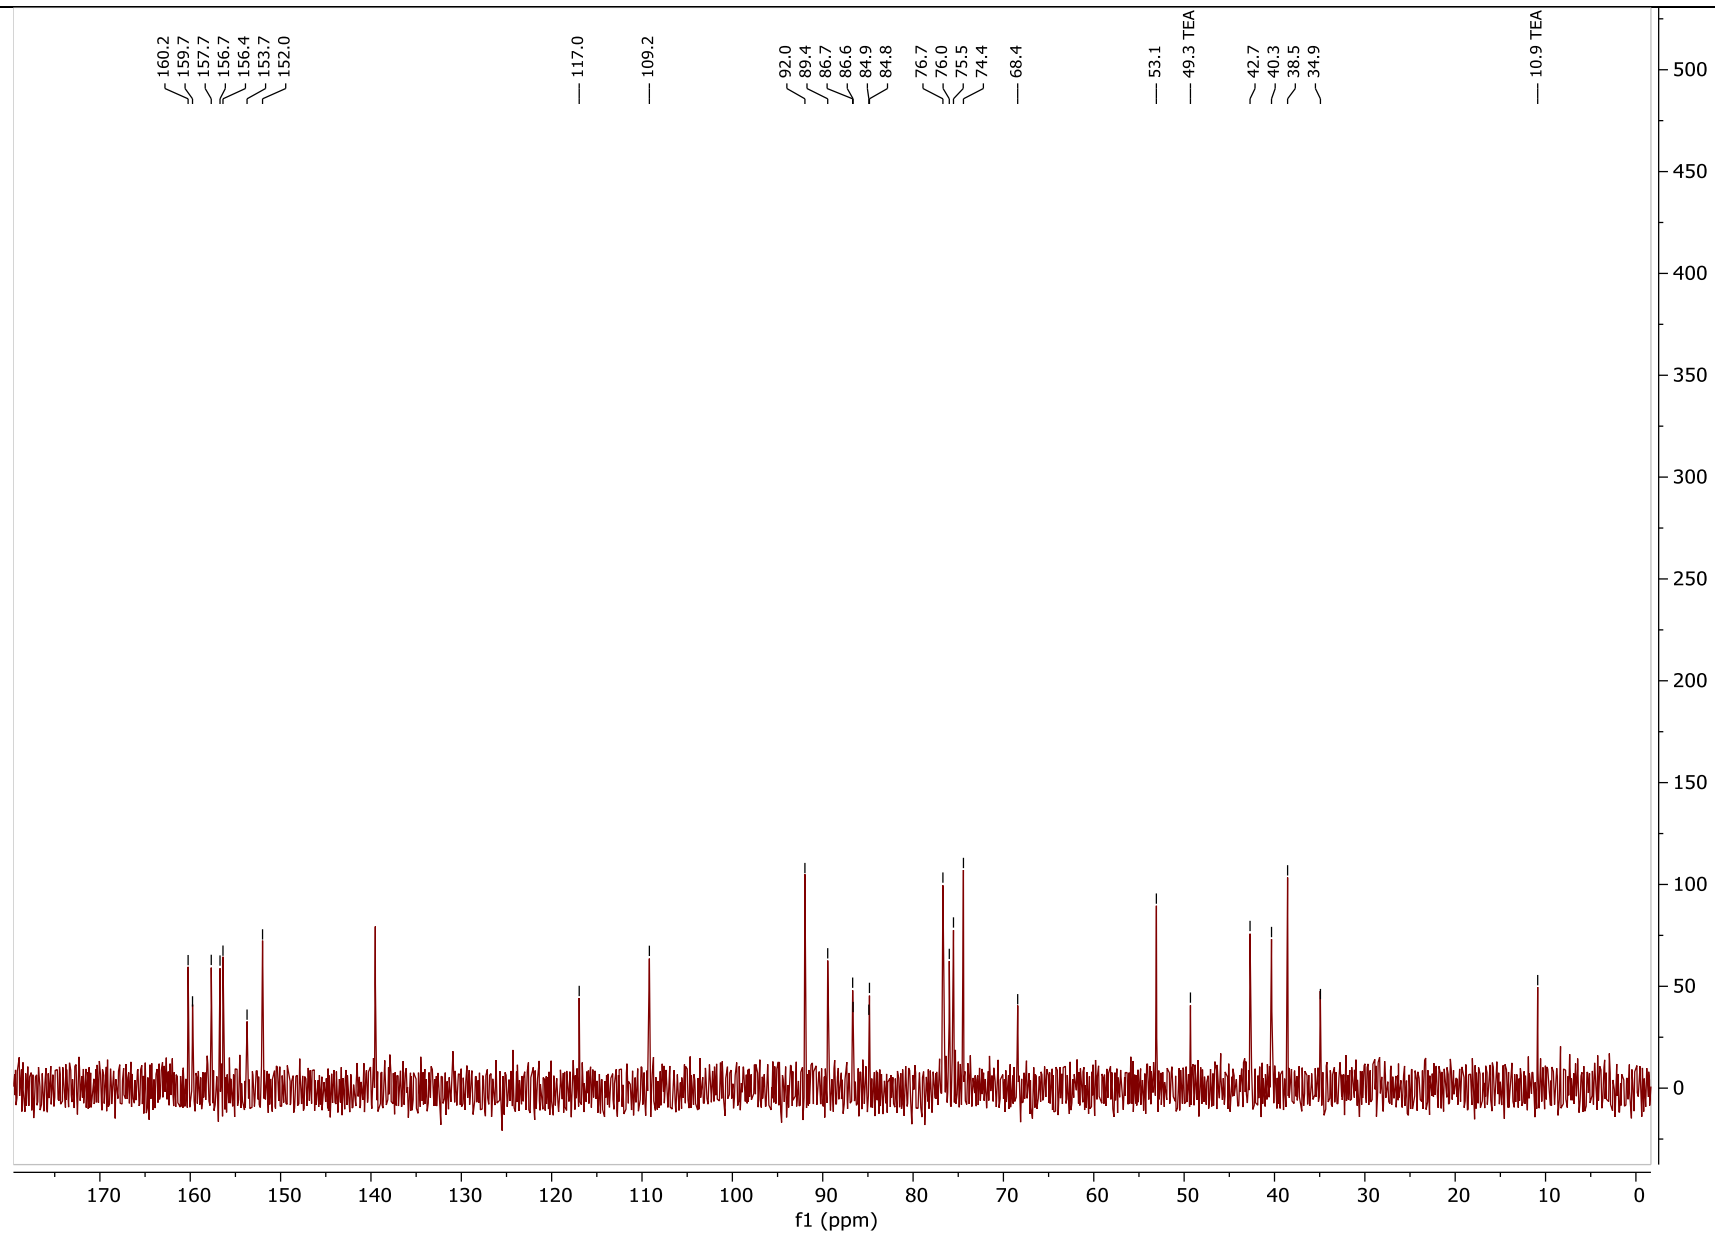

HSQC NMR

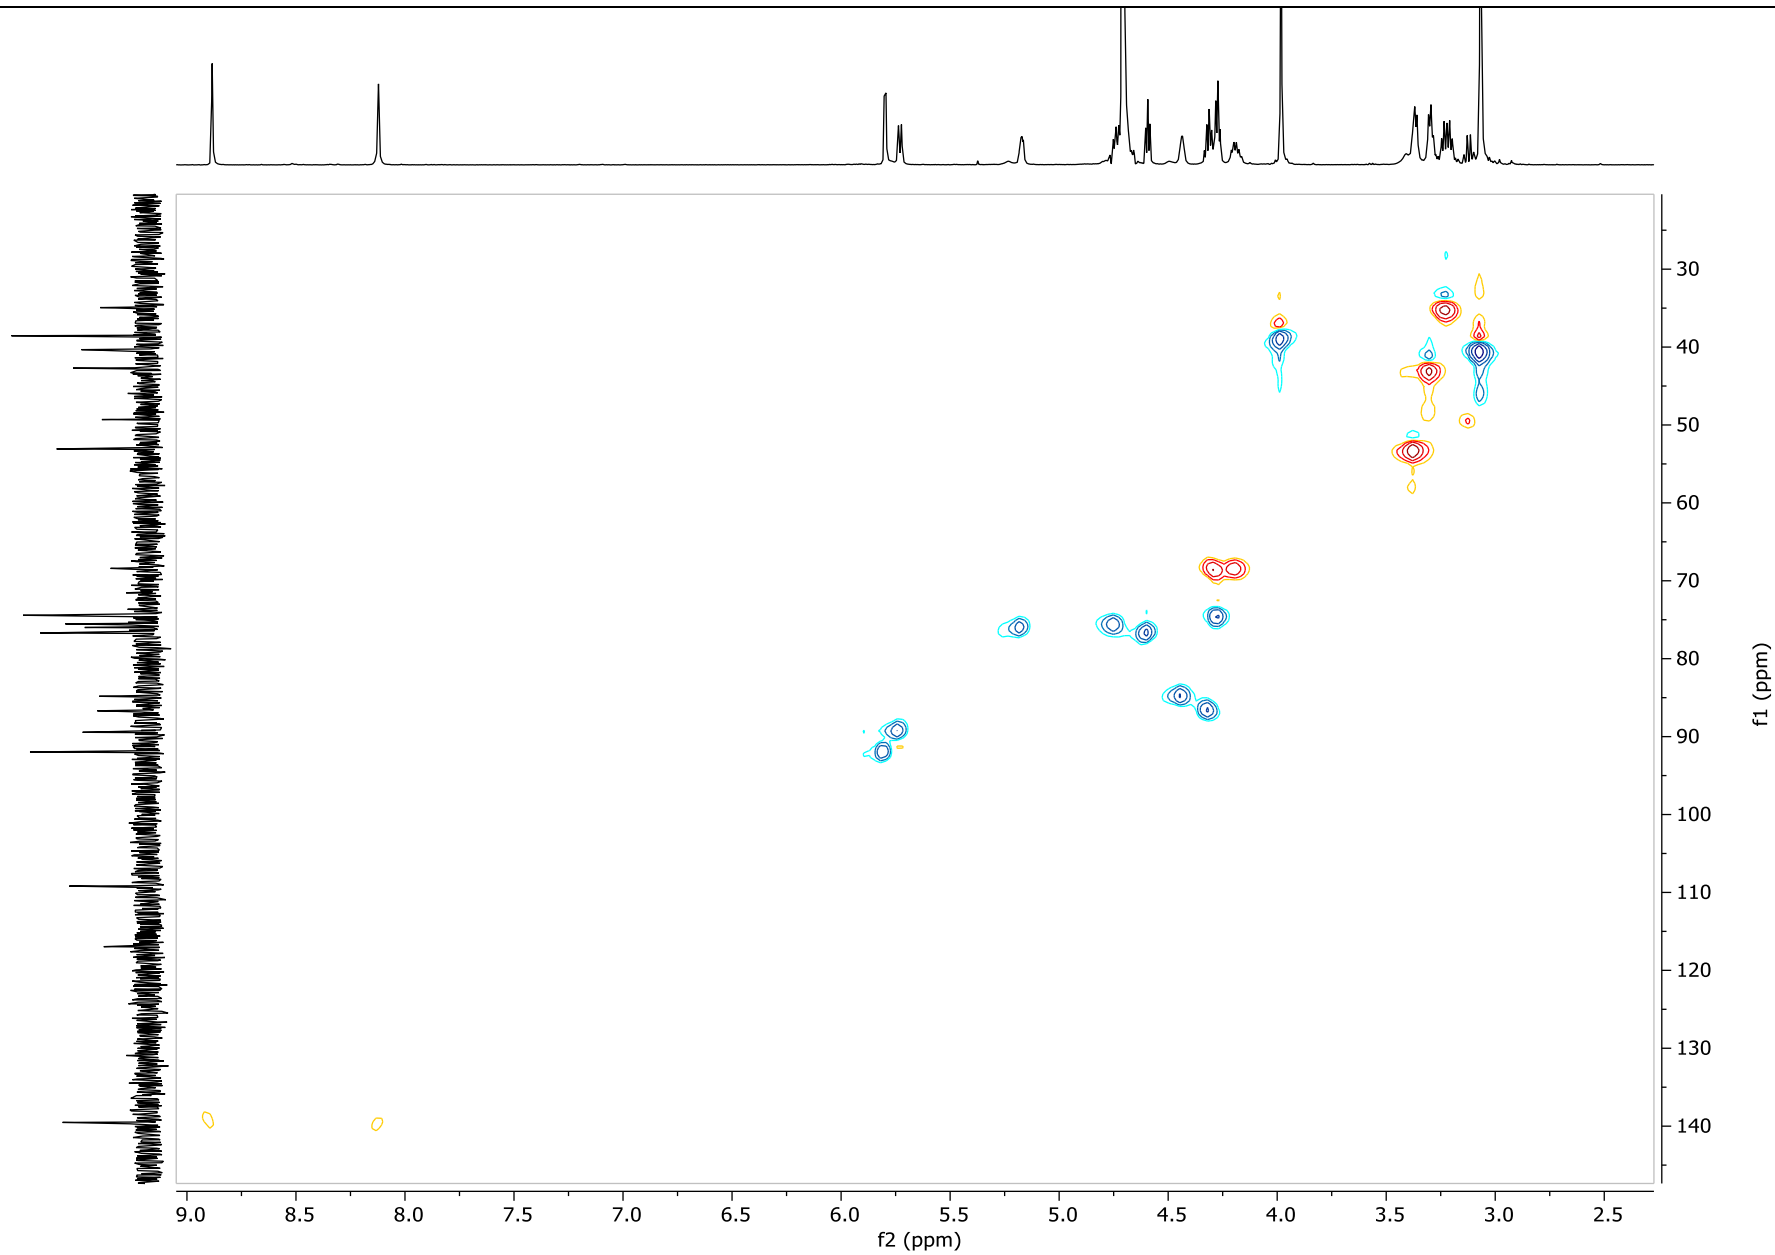



$^{31}\text{P}$  NMR (203 MHz,  $\text{D}_2\text{O}$ ,  $\text{H}_3\text{PO}_4$ , 25°C)

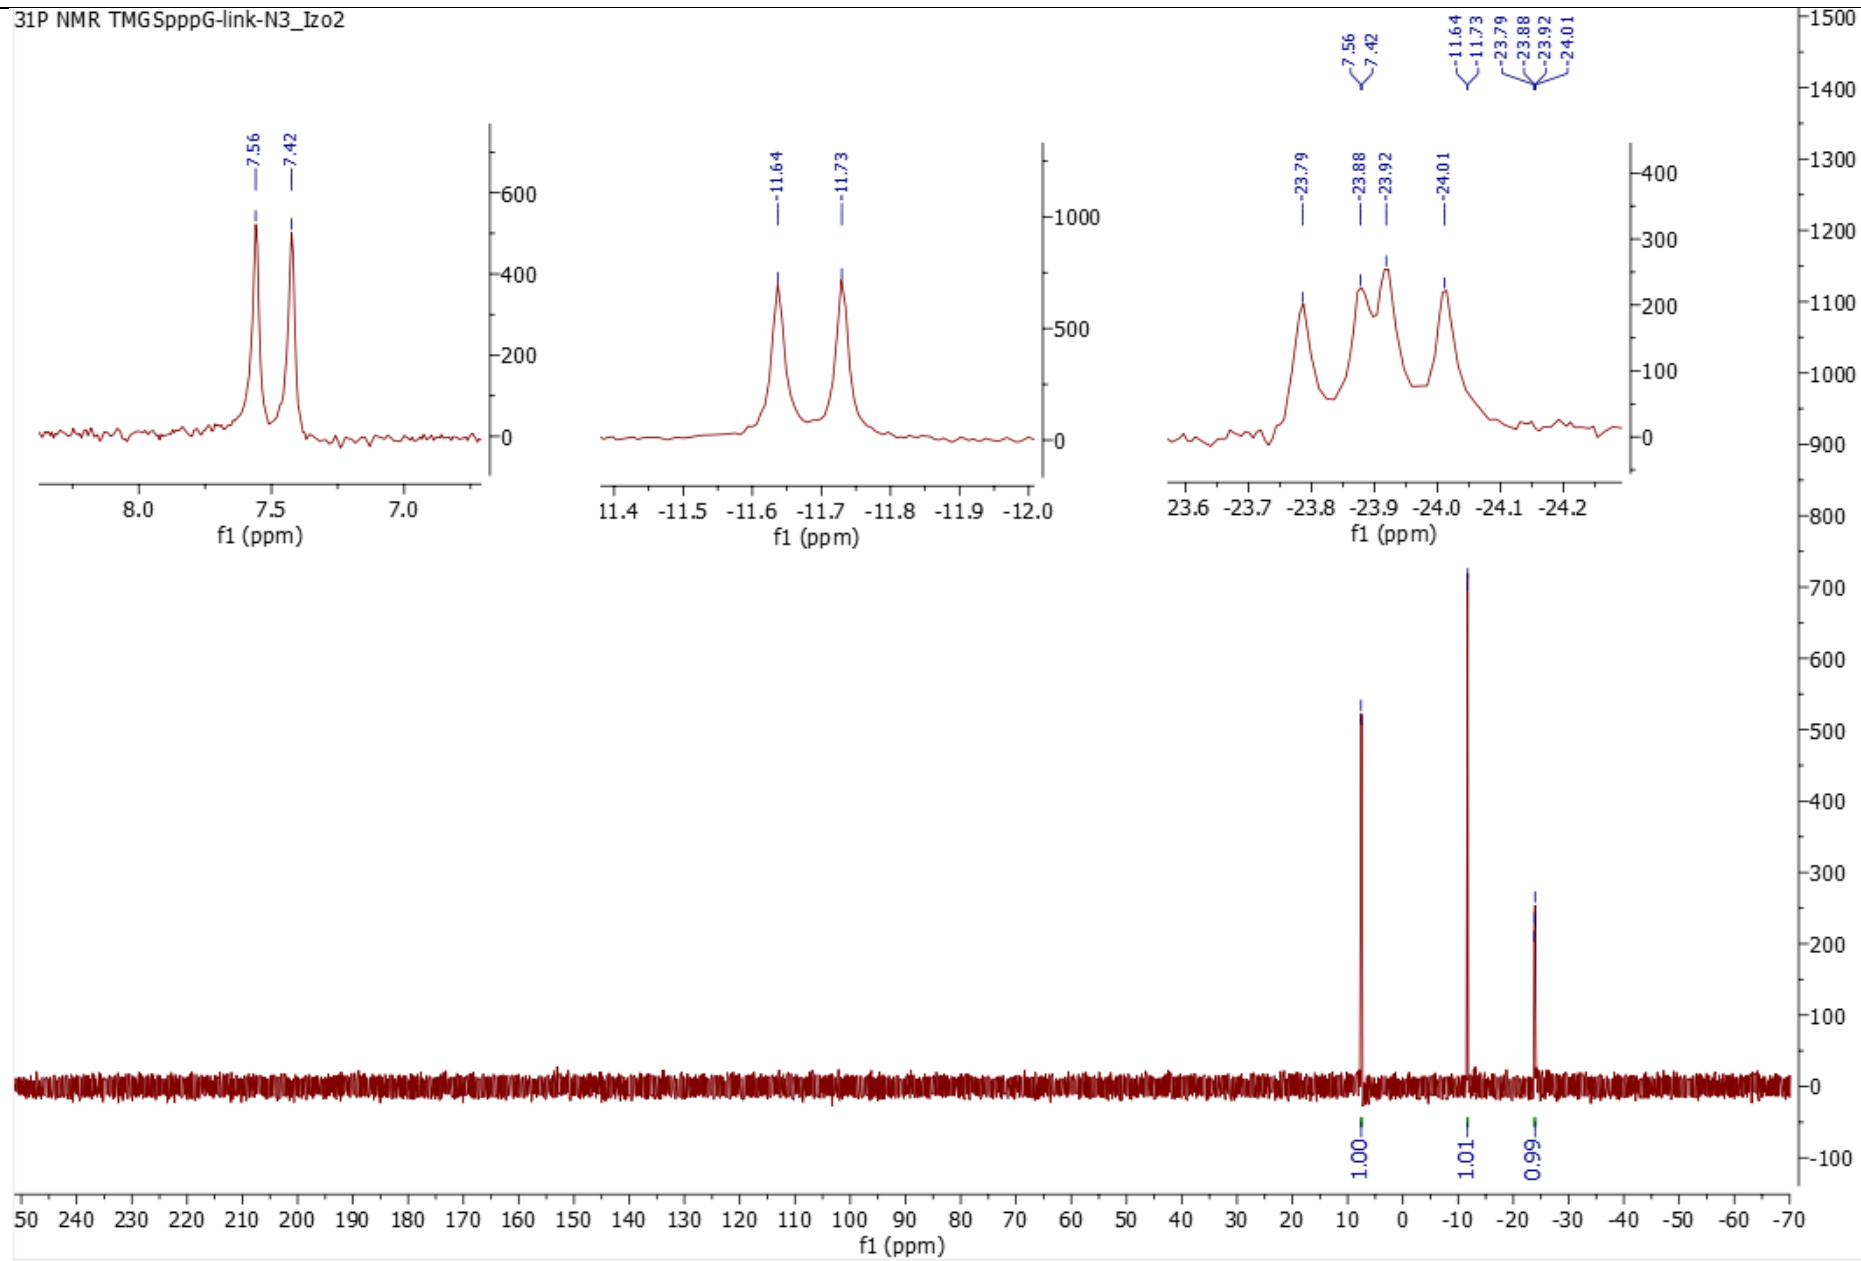

Compound 3-2': TMGppCH<sub>2</sub>pG-2'-O-C(O)NH-CH<sub>2</sub>CH<sub>2</sub>N<sub>3</sub> (NH<sub>4</sub><sup>+</sup> salt)

Chemical structure

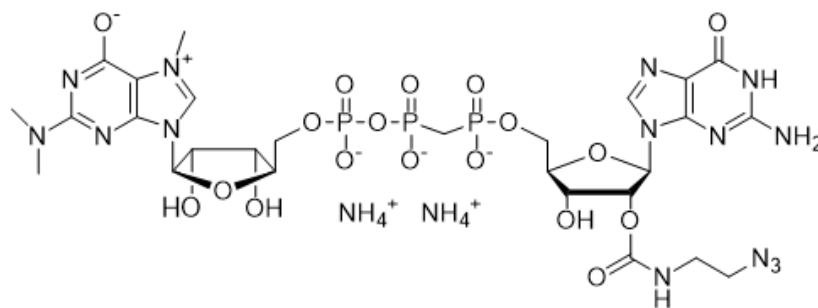

RP-HPLC (conditions c)

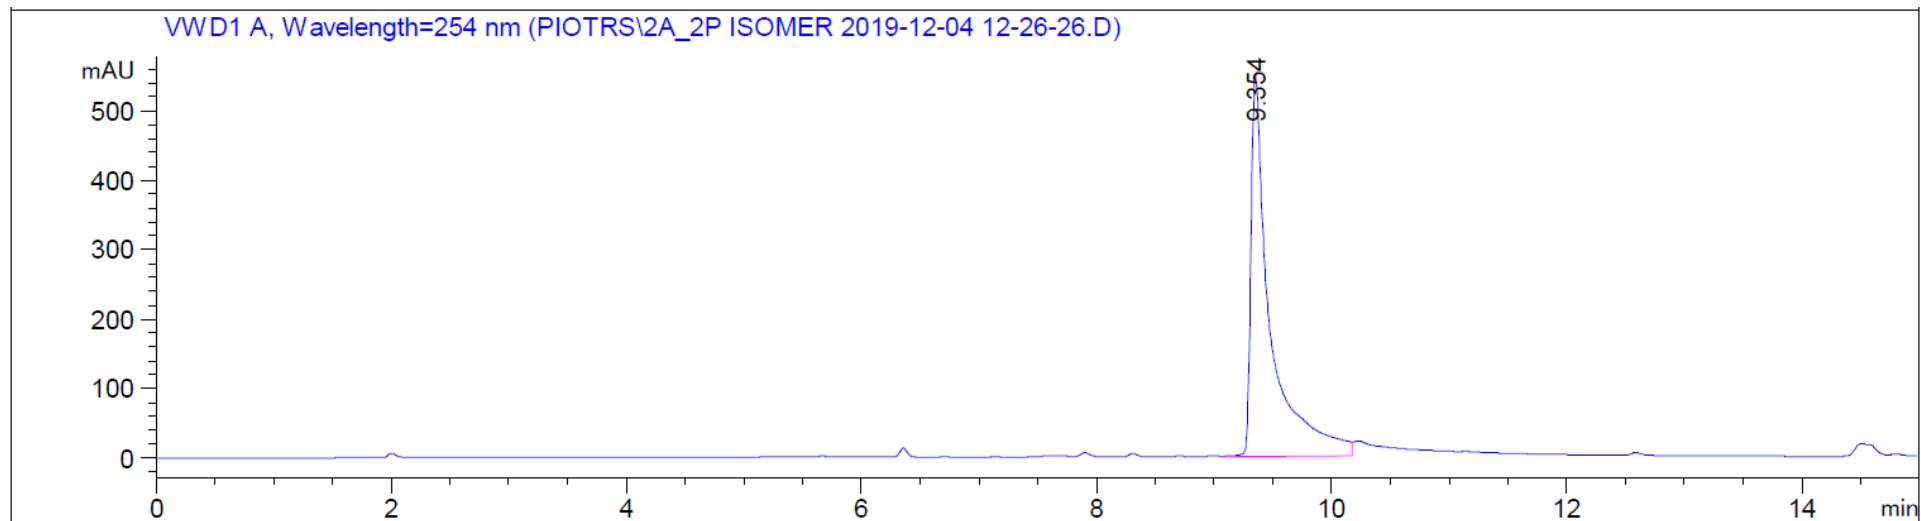

MS (-) ESI (Calc. [M-H]<sup>-</sup> C<sub>27</sub>H<sub>38</sub>N<sub>14</sub>O<sub>18</sub>P<sub>3</sub> : 939.1707, found: 939.17242)

190528\_PSU\_12 #99-152 RT: 0.95-1.46 AV: 54 NL: 3.63E6  
190528\_PSU\_12 #99-152 RT: 0.95-1.46 AV: 54 NL: 3.63E6  
T: FTMS - p ESI Full ms [150.0000-2000.0000]

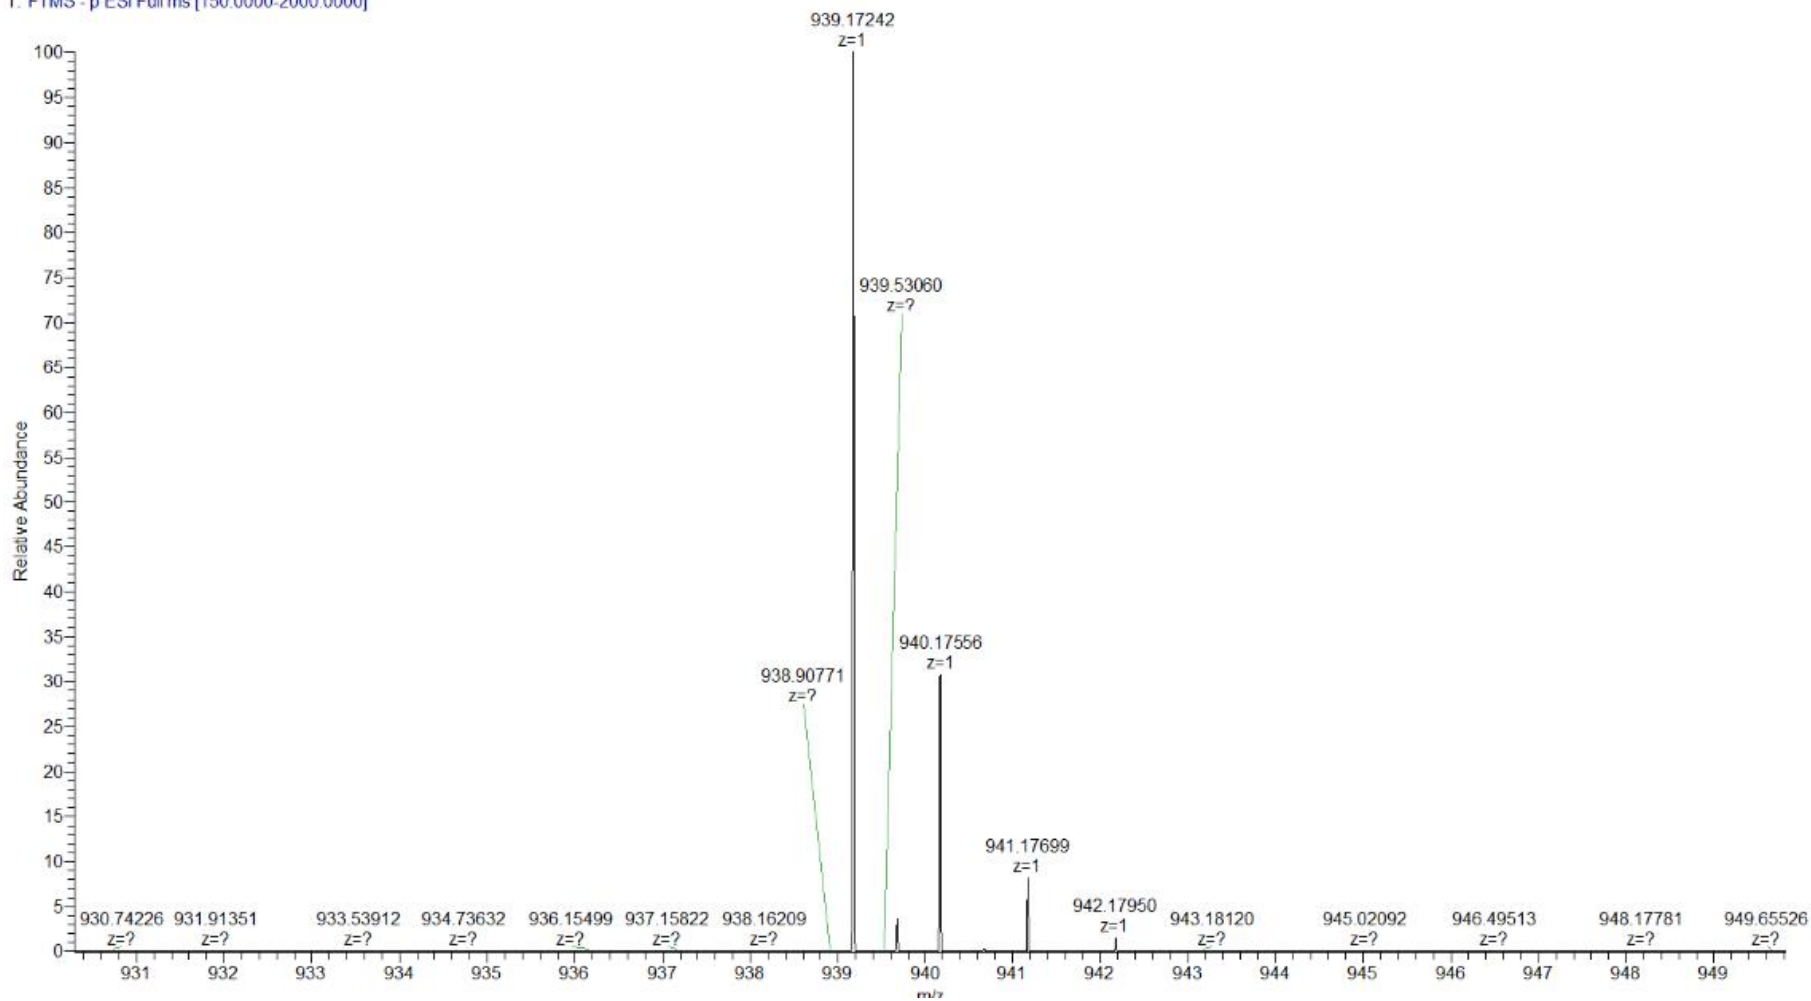

<sup>1</sup>H NMR (400 MHz, D<sub>2</sub>O, 25°C)

<sup>1</sup>H NMR TMGppCH<sub>2</sub>p-2'-O-linker-N3

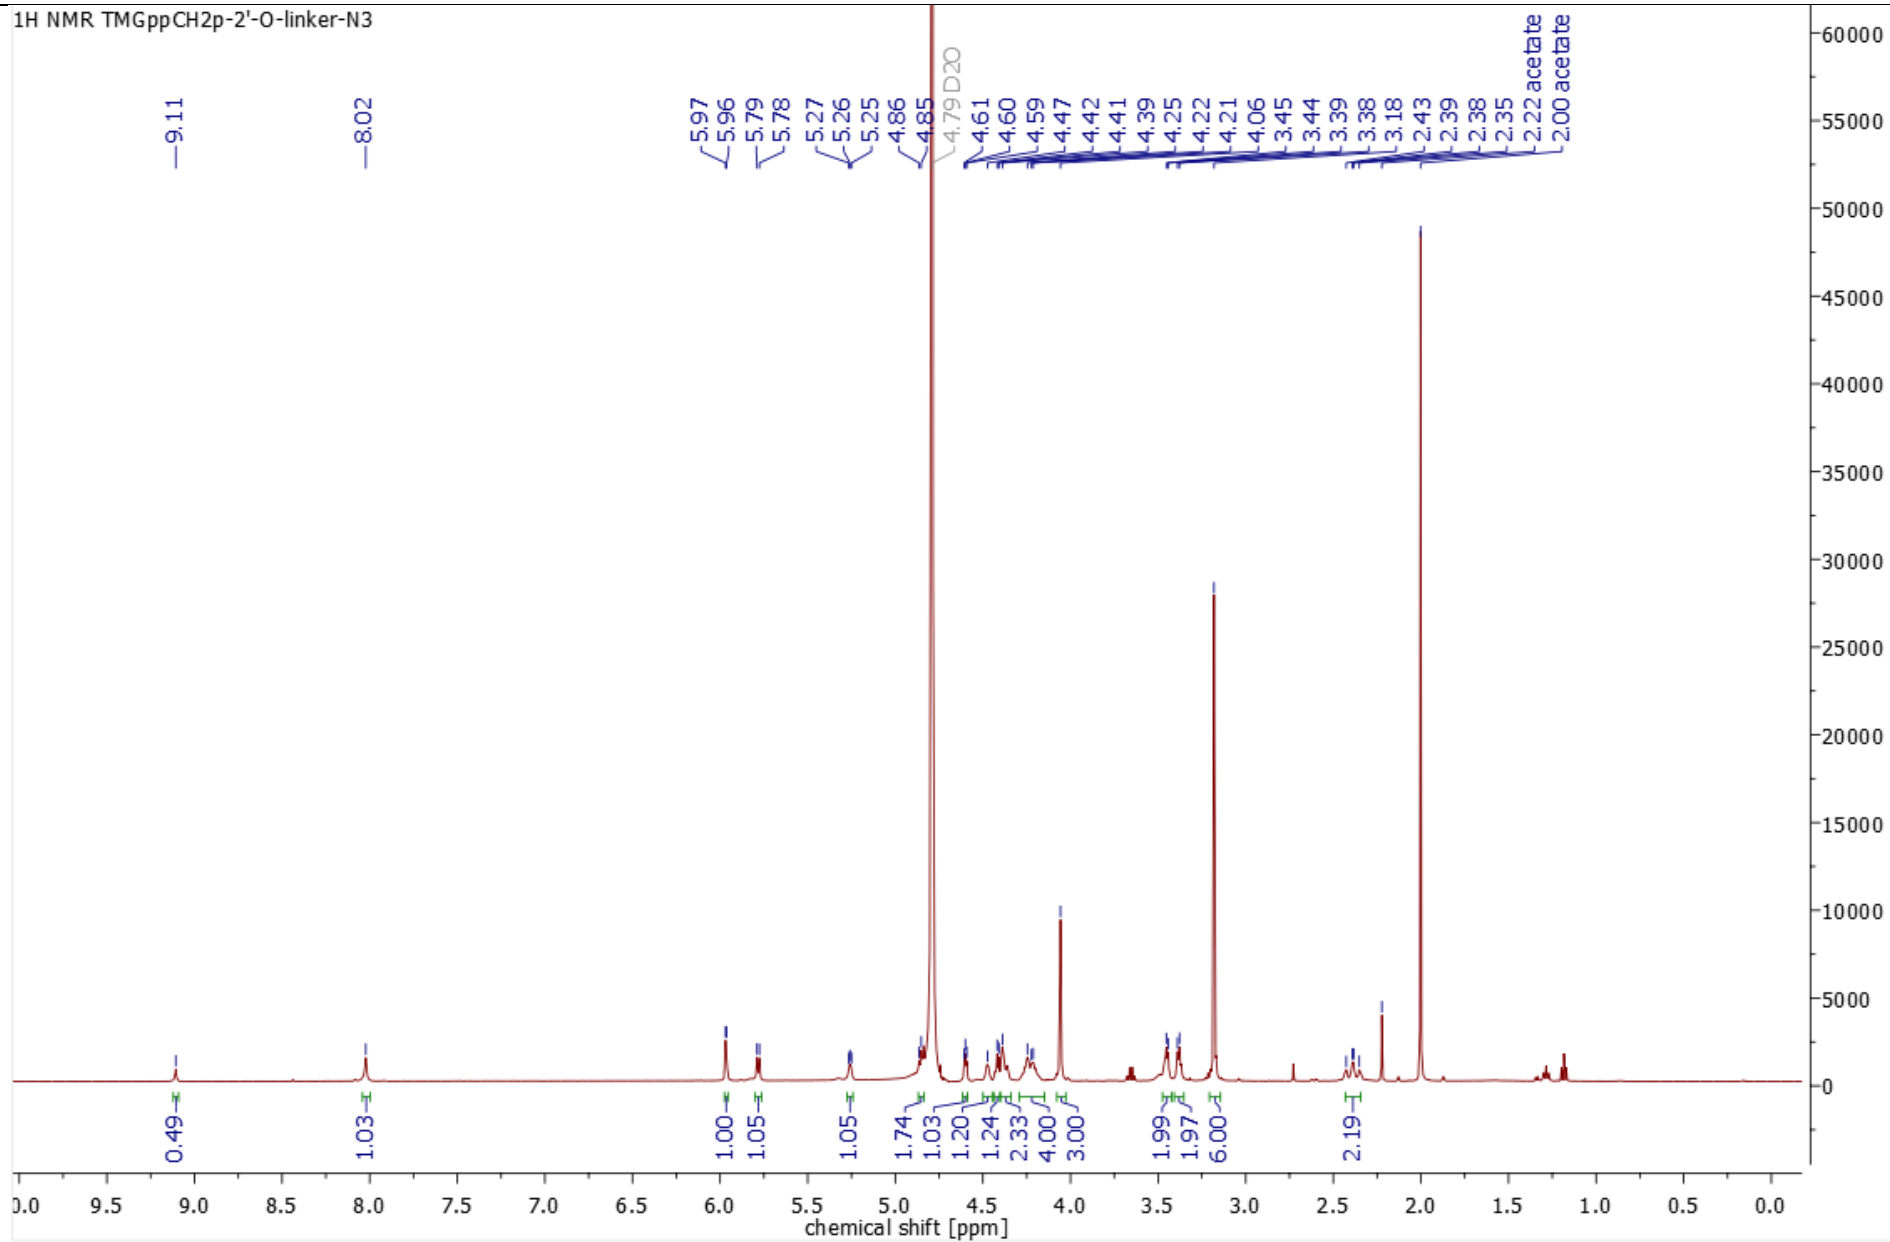

COSY NMR

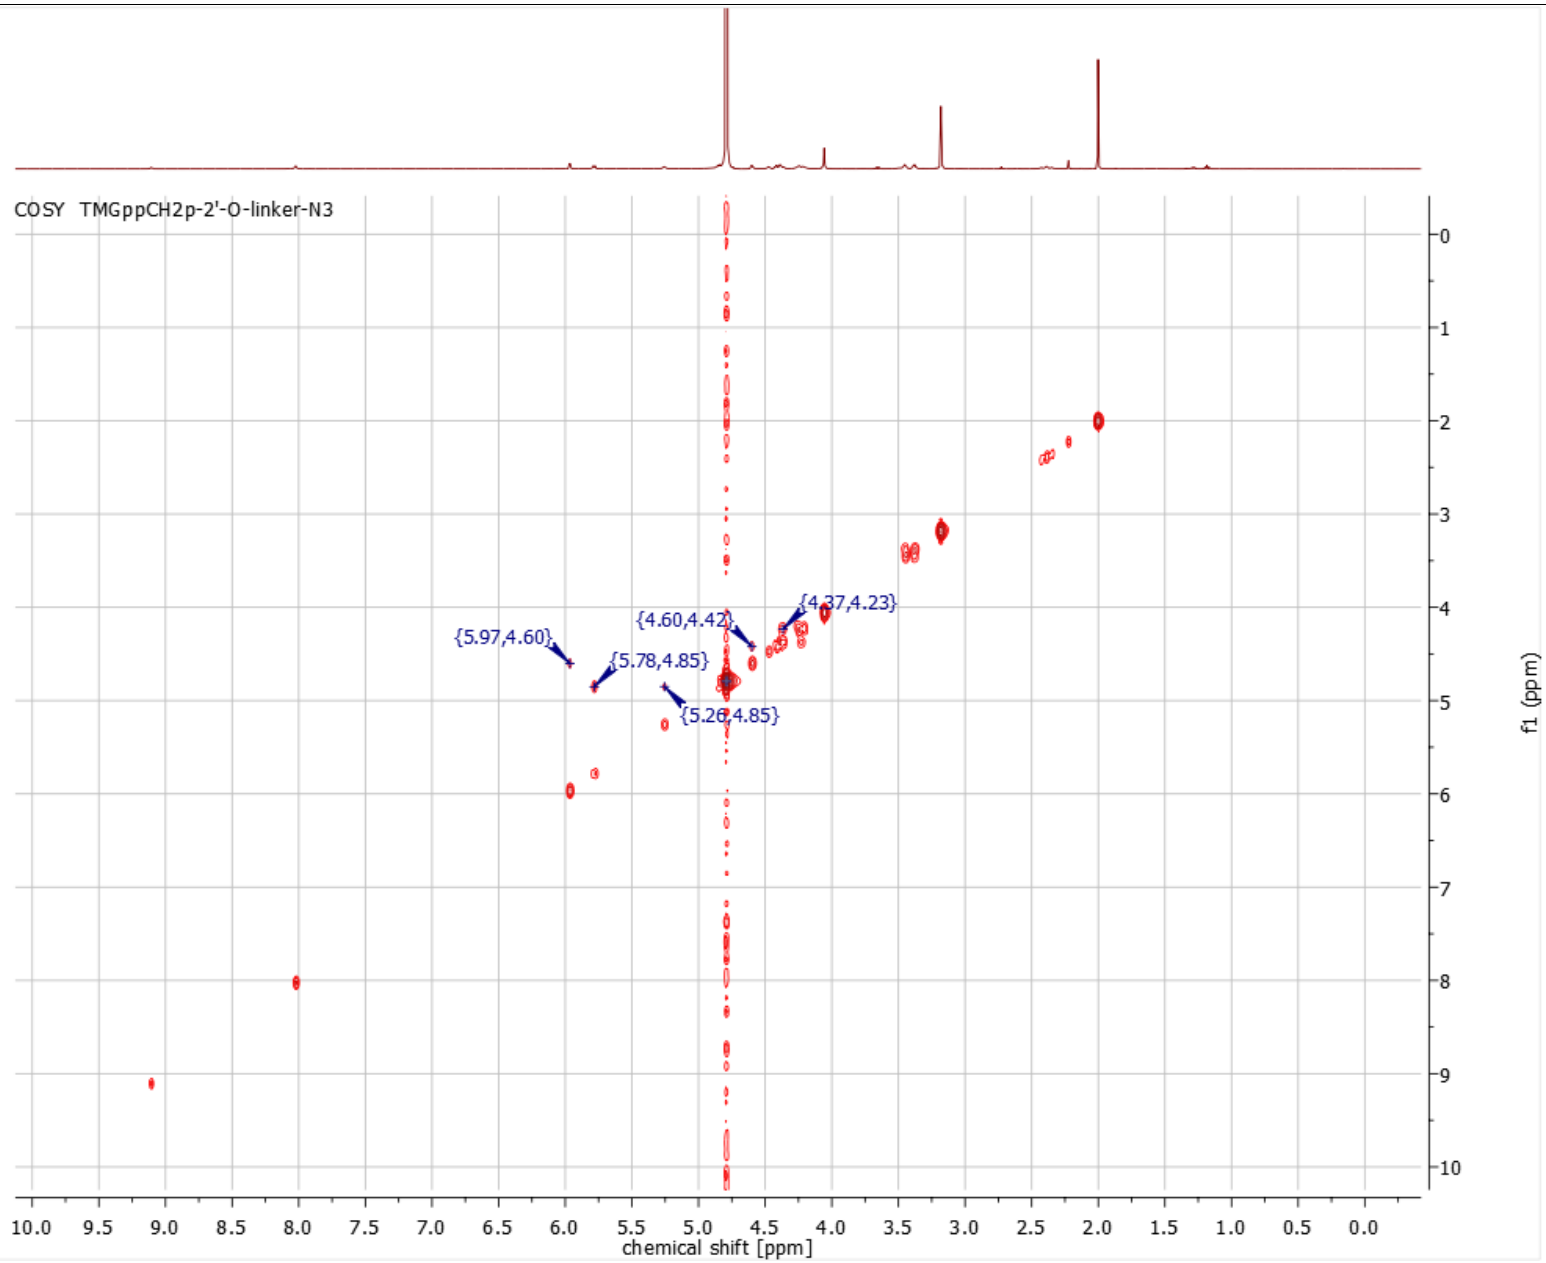

$^{31}\text{P}$  NMR (202 MHz,  $\text{D}_2\text{O}$ ,  $\text{H}_3\text{PO}_4$ ,  $25^\circ\text{C}$ )

31P NMR TMGppCH2p-2'-O-linker-N3

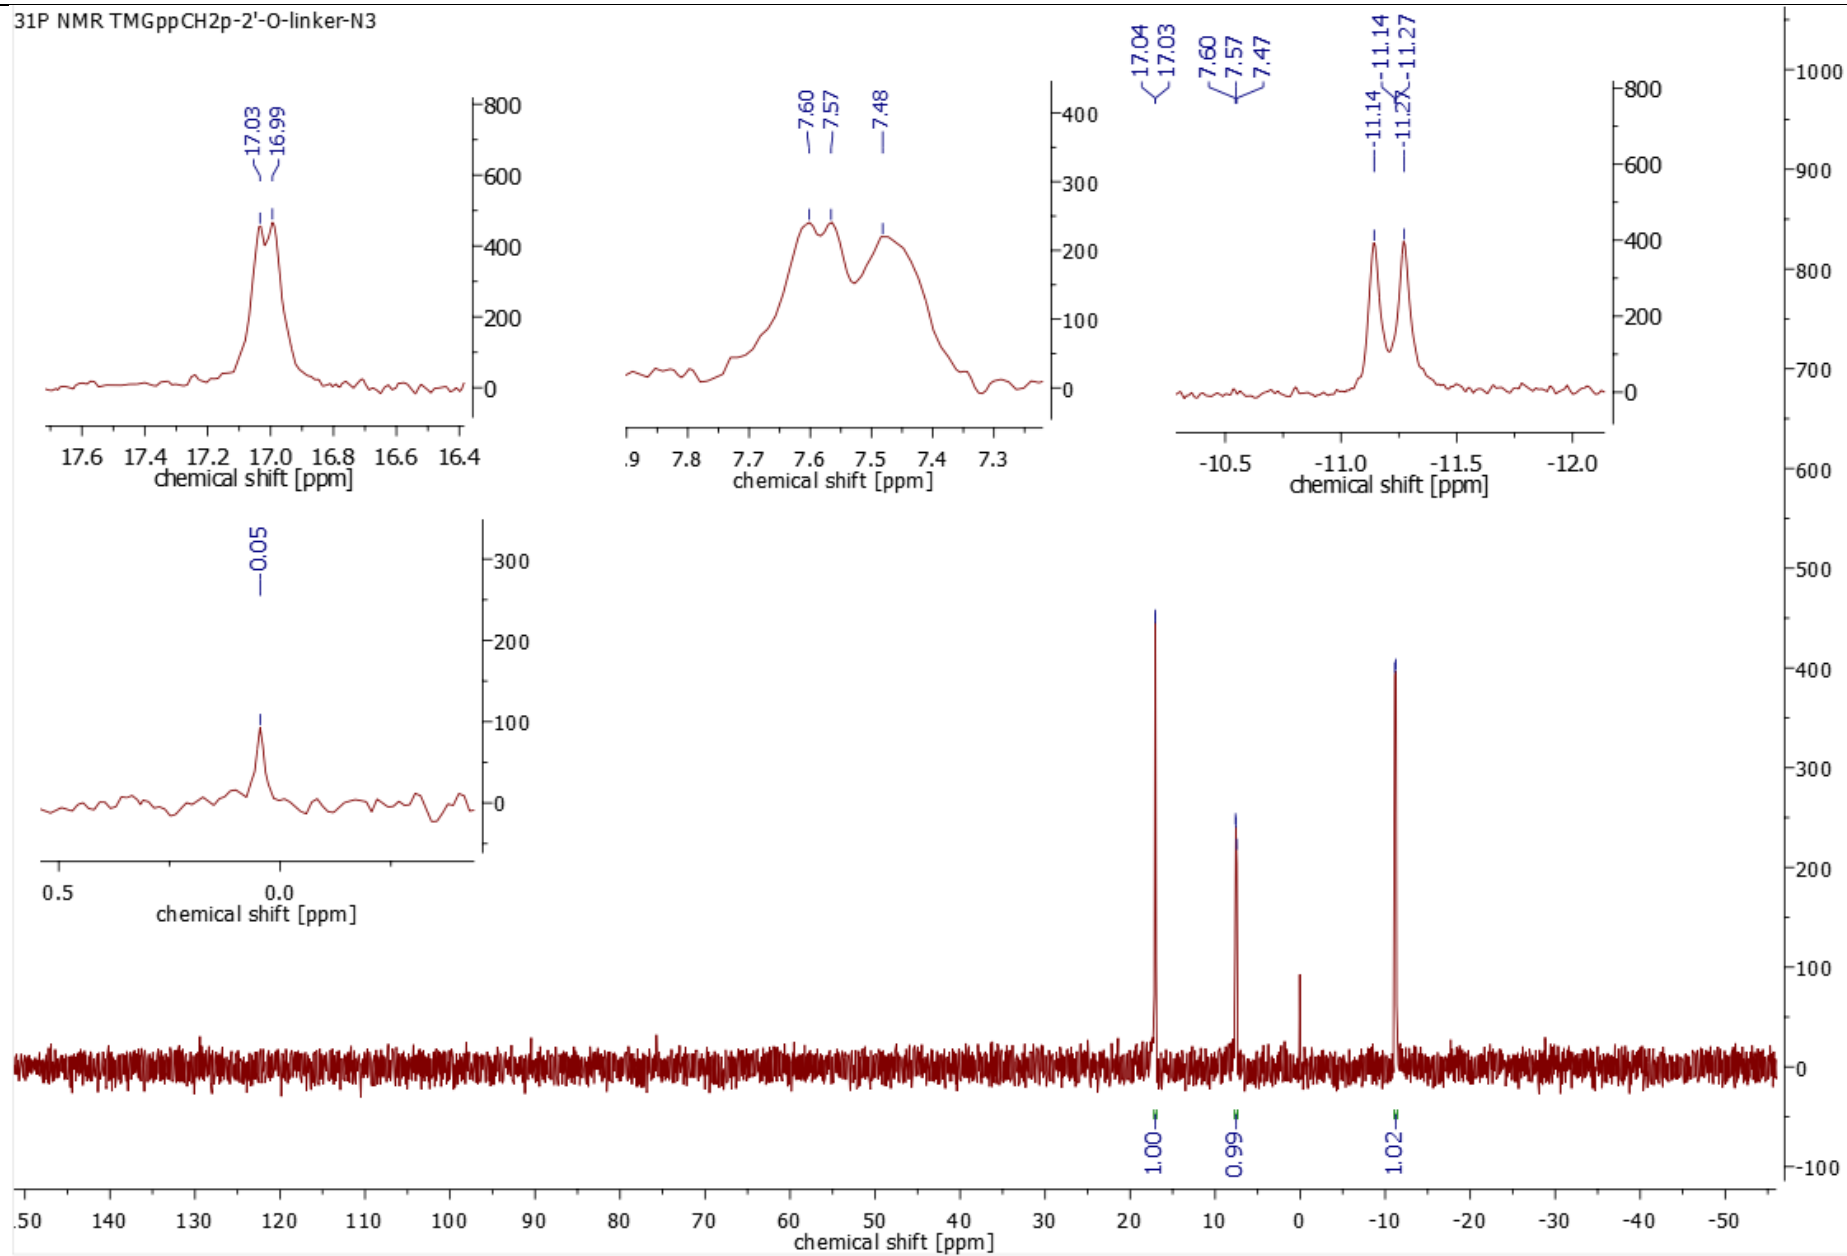

Compound 3-3': TMGppCH<sub>2</sub>pG-3'-O-C(O)NH-CH<sub>2</sub>CH<sub>2</sub>N<sub>3</sub> (NH<sub>4</sub><sup>+</sup> salt)

Chemical structure

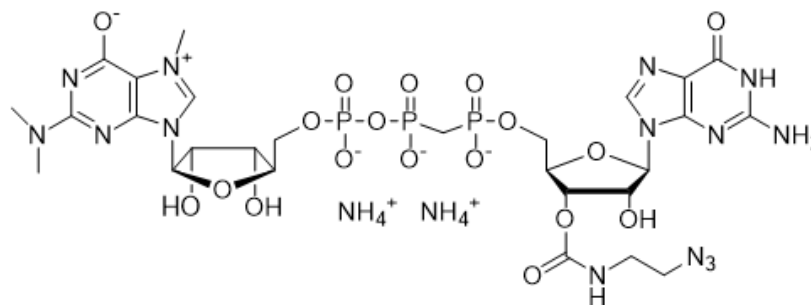

RP-HPLC (conditions c)

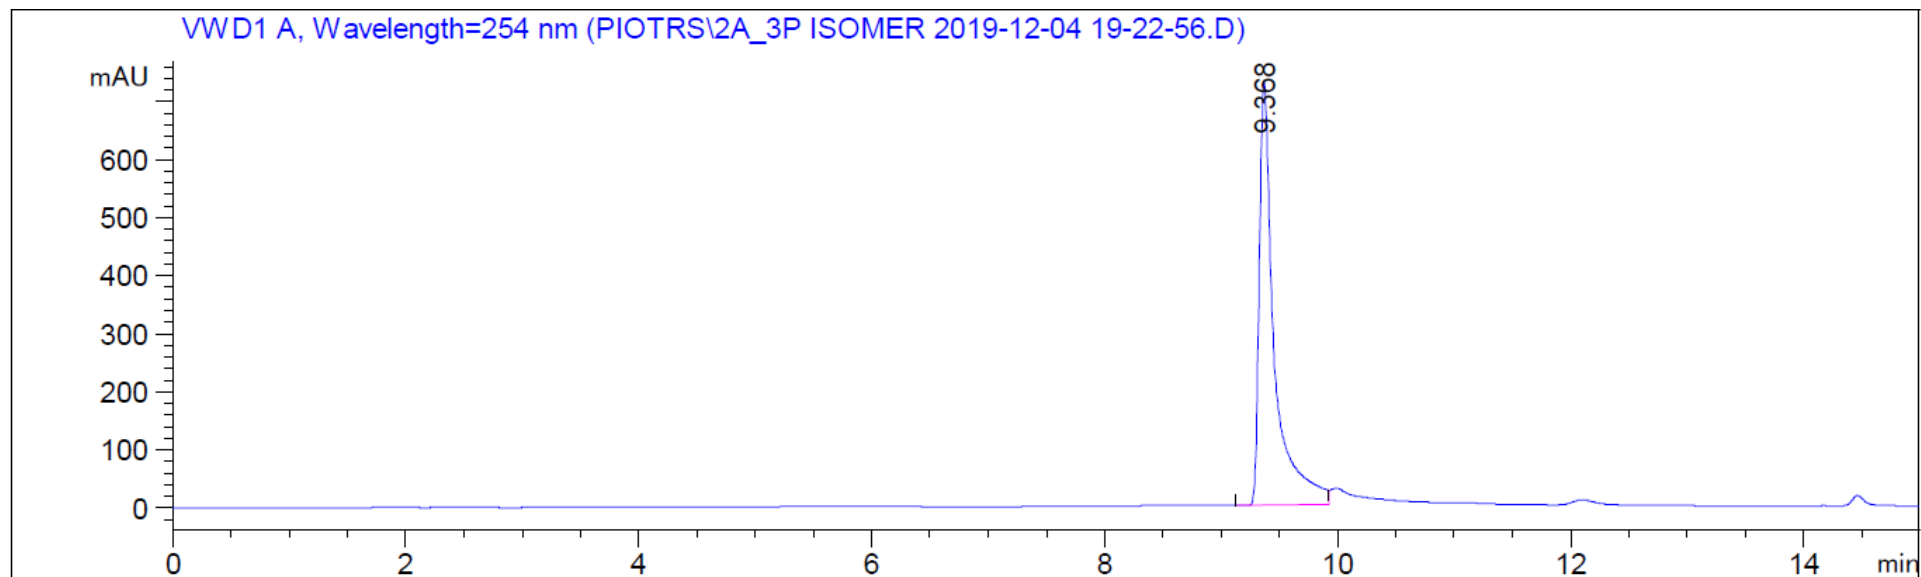

MS (-) ESI (Calc. [M-H]<sup>-</sup> C<sub>27</sub>H<sub>38</sub>N<sub>14</sub>O<sub>18</sub>P<sub>3</sub> : 939.1707, found: 939.17200)

220407\_PSu\_01 #18-90 RT: 0.16-0.78 AV: 73 NL: 2.73E7  
T: FTMS - p ESI Full ms [160.0000-2000.0000]

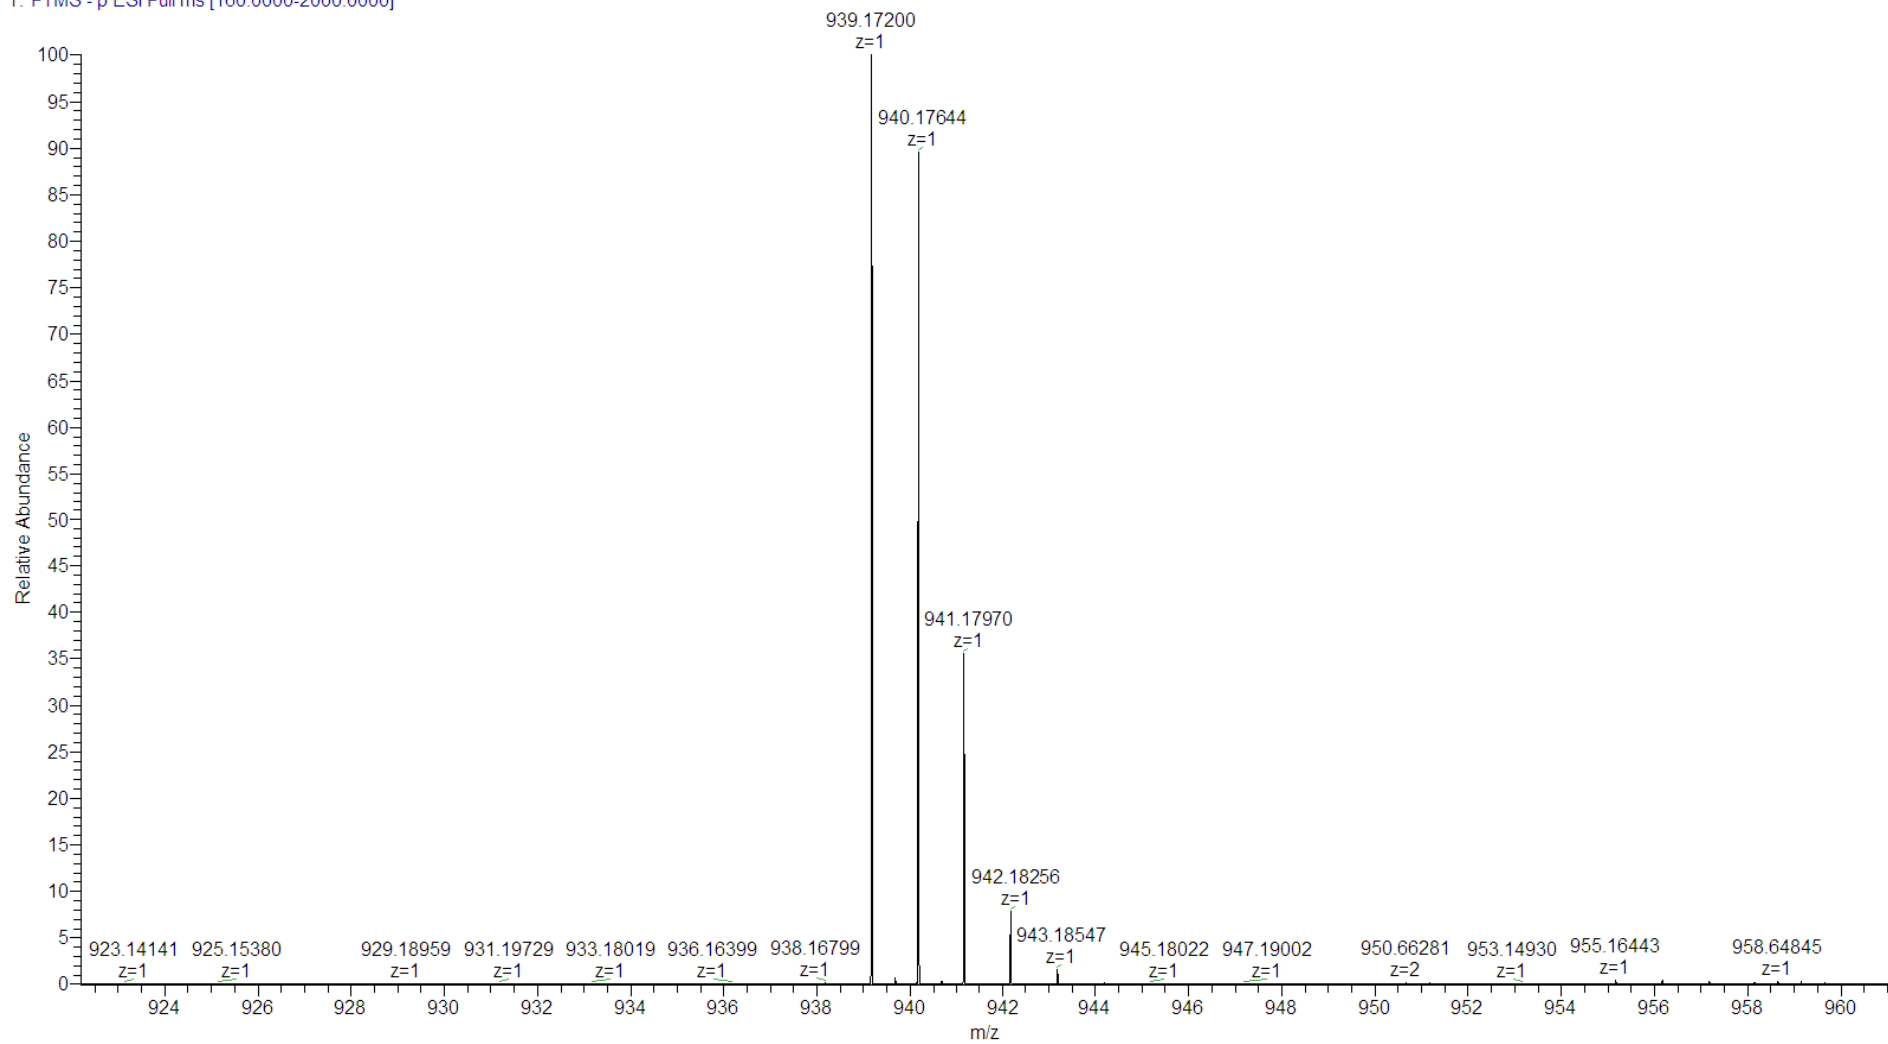



<sup>1</sup>H NMR (400 MHz, D<sub>2</sub>O, 25°C)

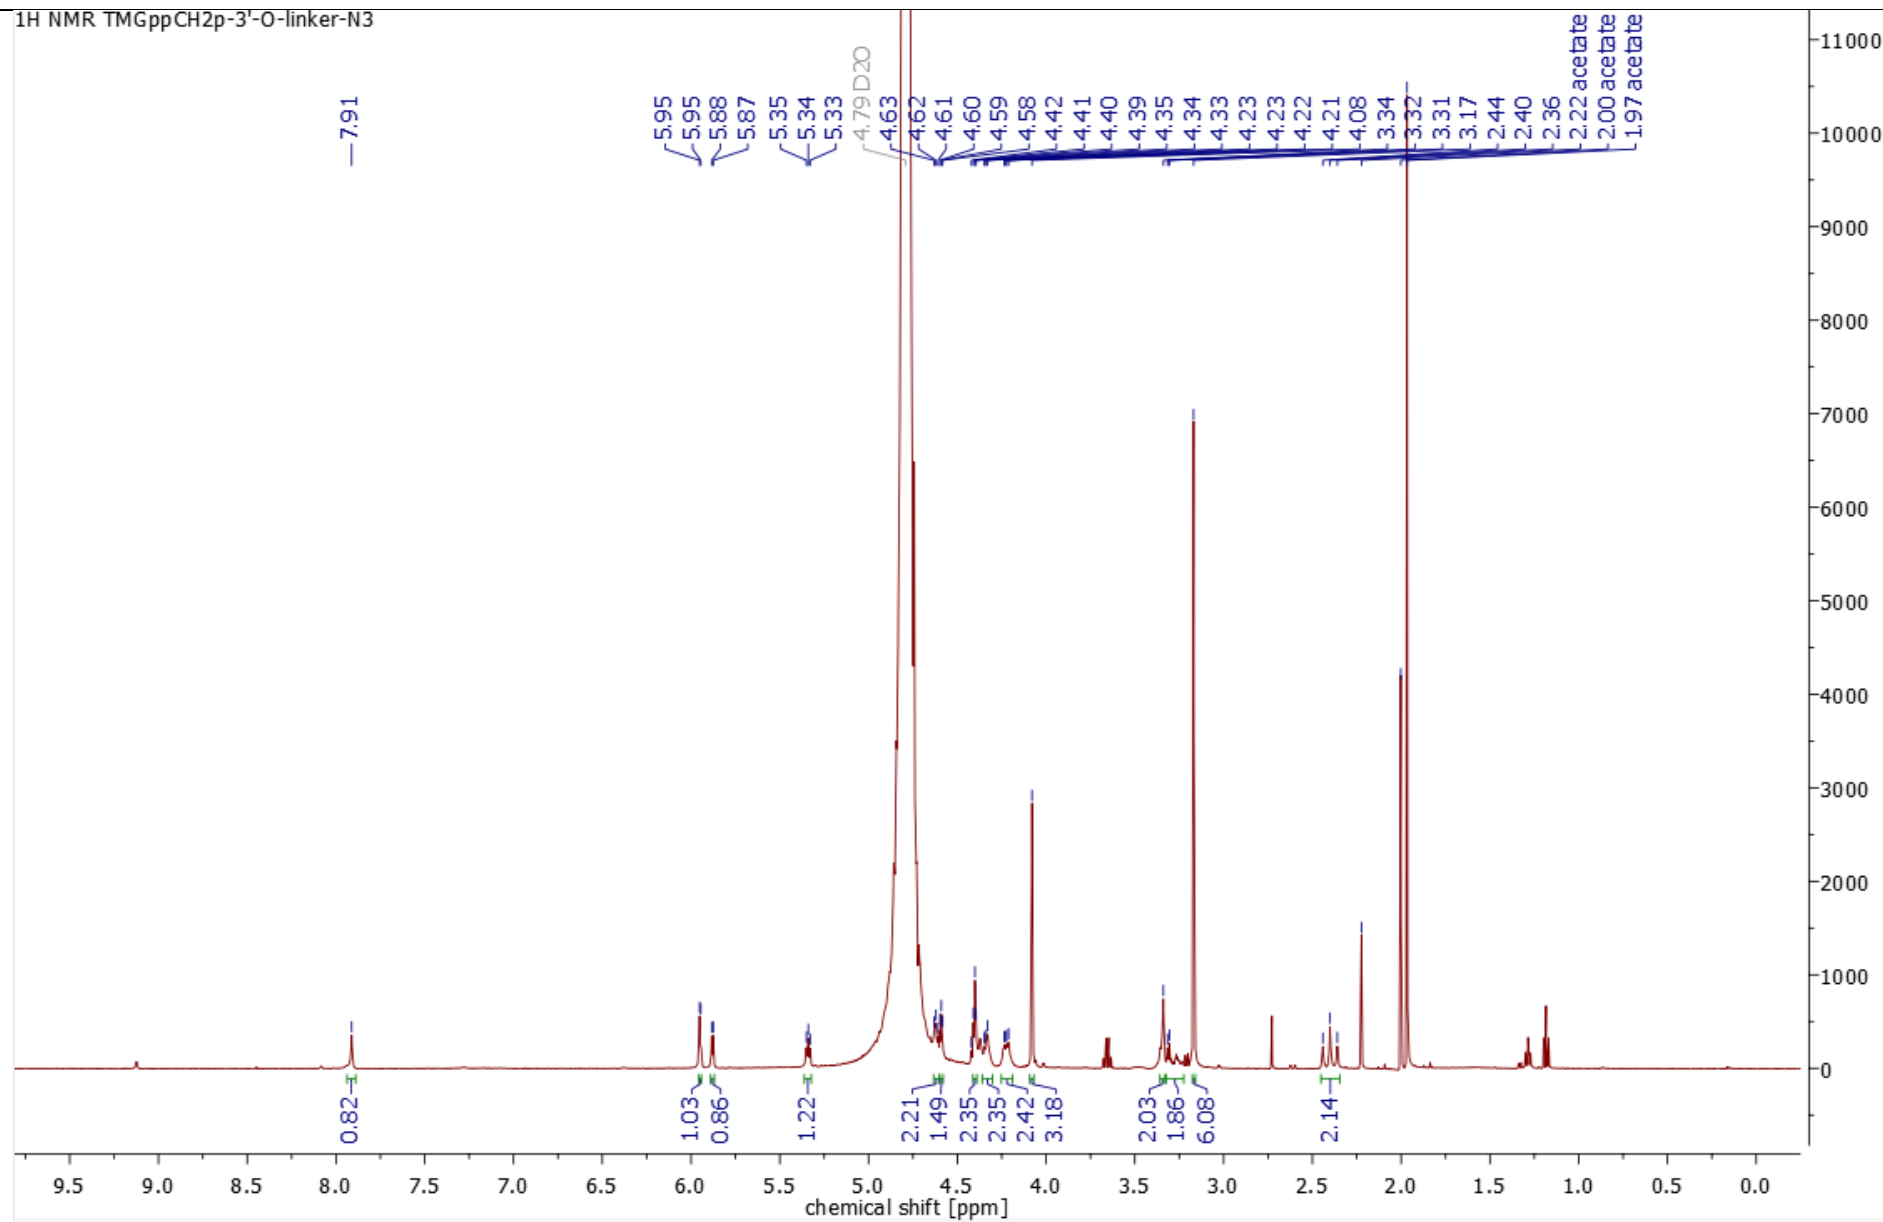

COSY NMR

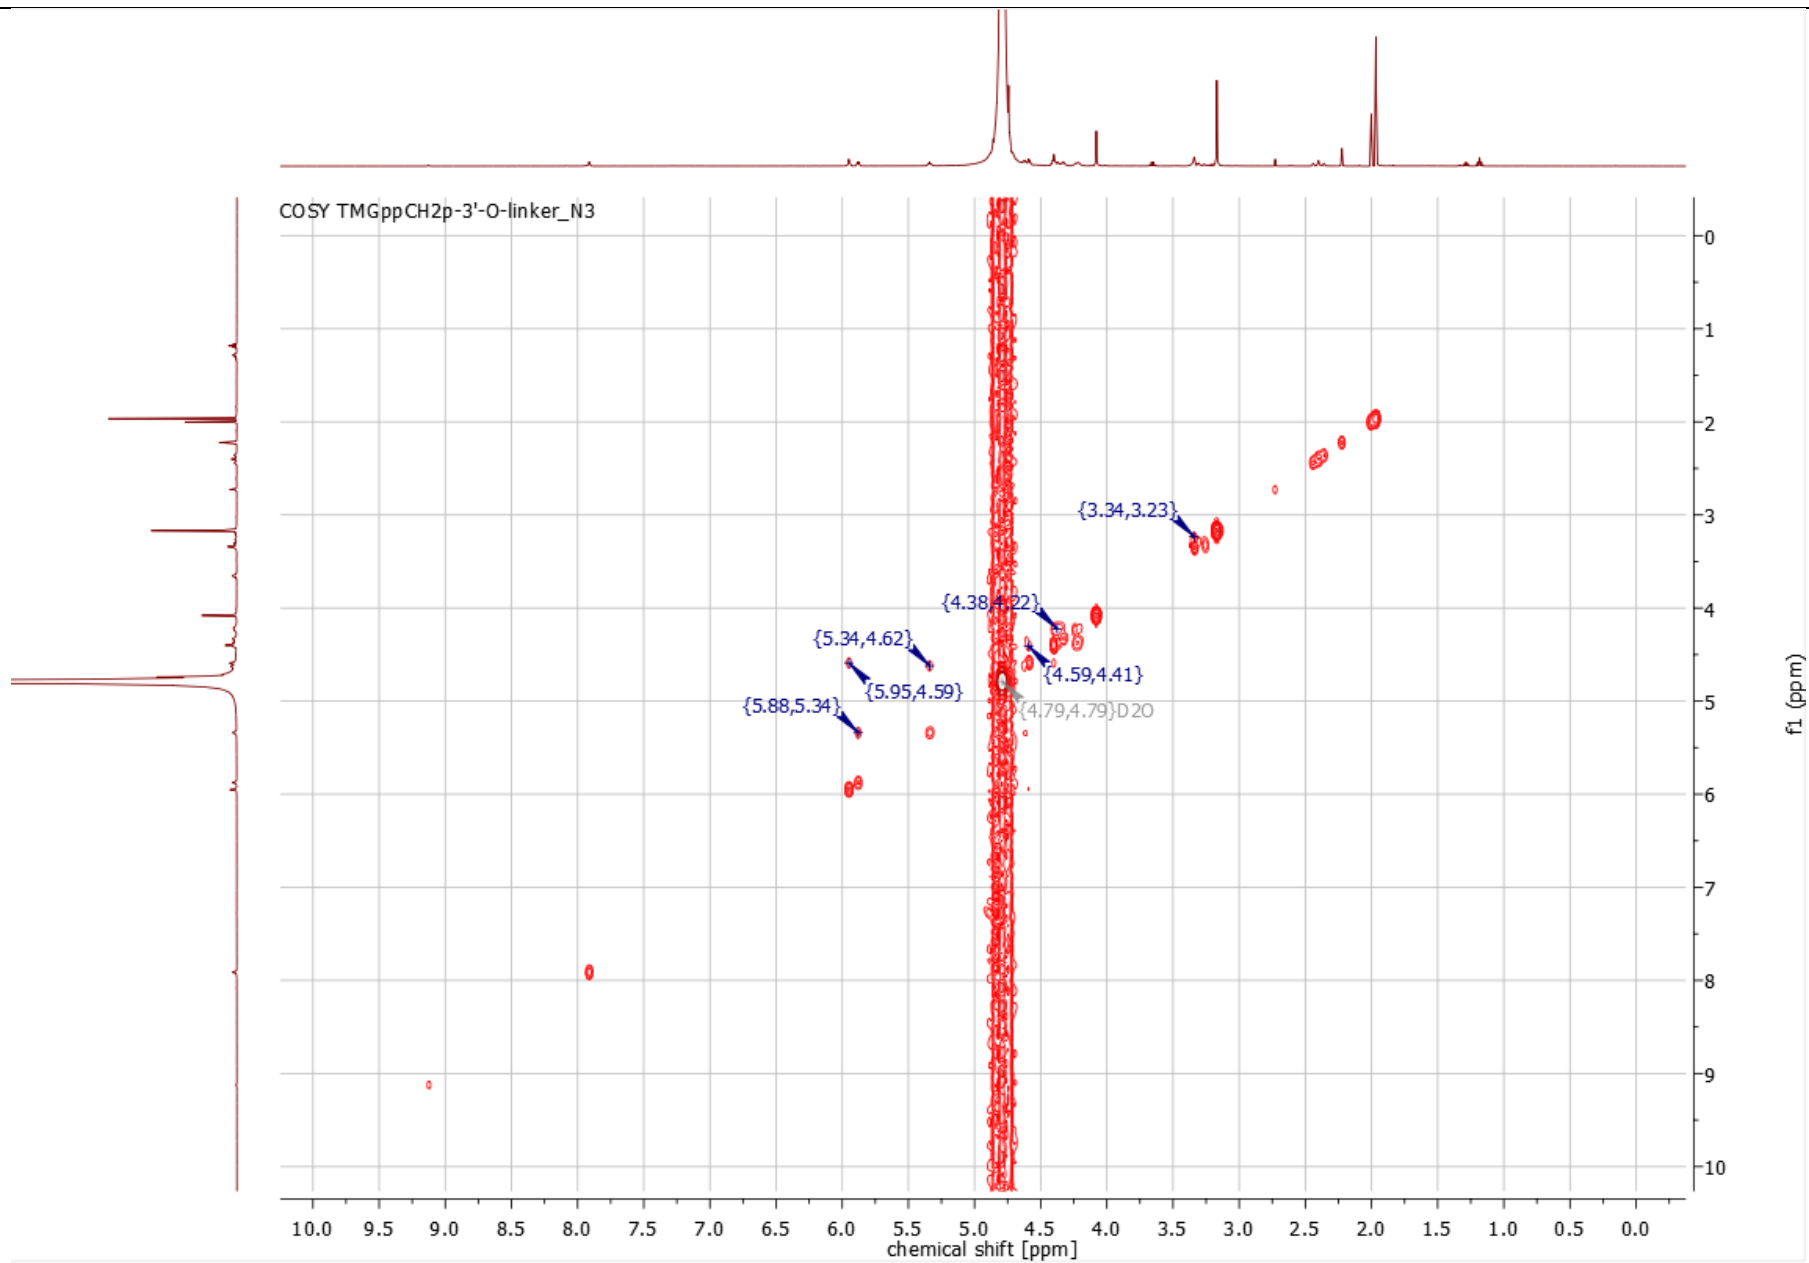

$^{31}\text{P}$  NMR (202 MHz,  $\text{D}_2\text{O}$ ,  $\text{H}_3\text{PO}_4$ , 25°C)

$^{31}\text{P}$  NMR TMGppCH2p-3'-O-linker-N3

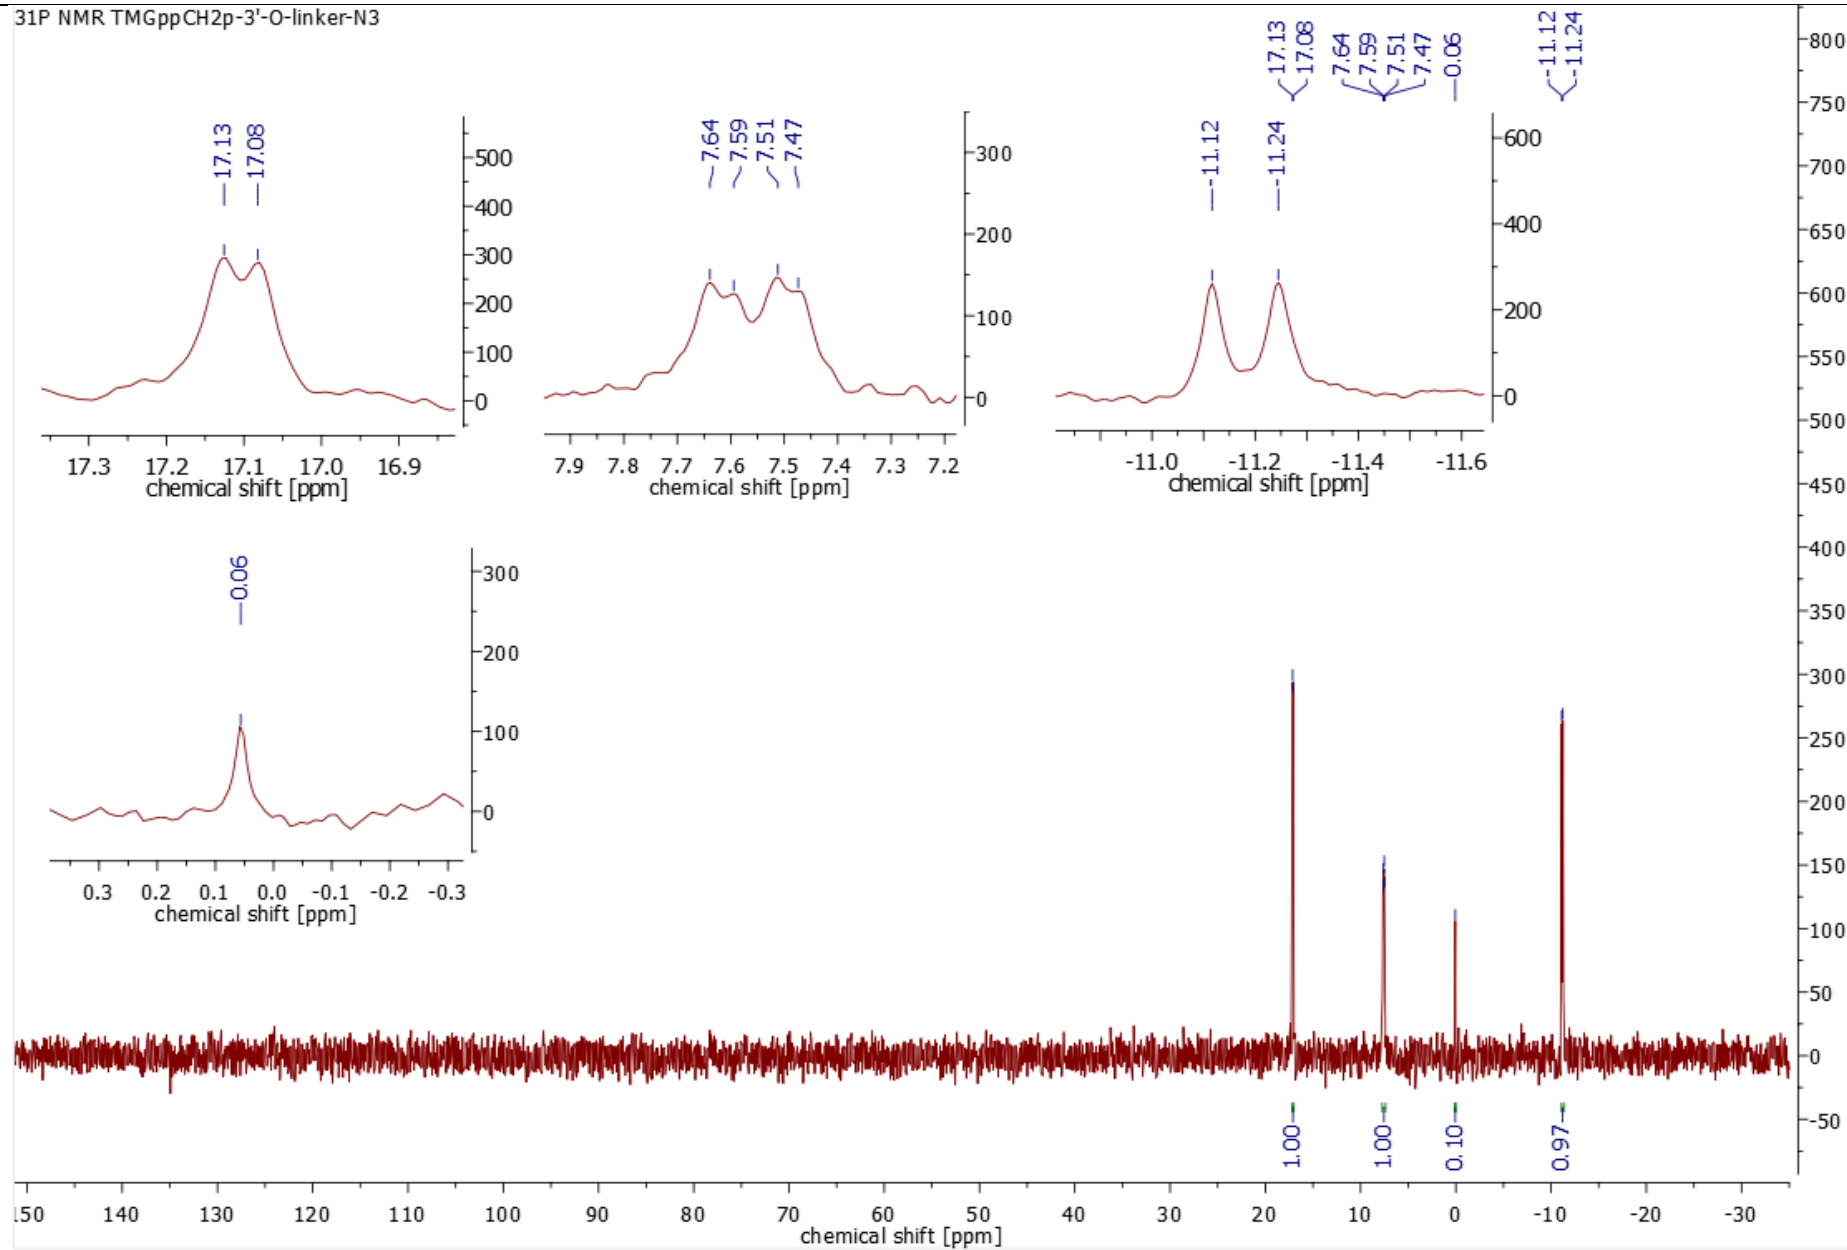

Compound 4-2': TMGpppA-2'-O-C(O)-NH-CH<sub>2</sub>-CH<sub>2</sub>-N<sub>3</sub> (NH<sub>4</sub><sup>+</sup> salt)

Chemical structure

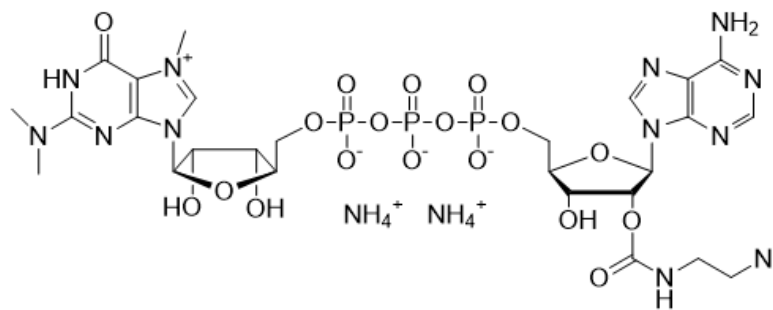

RP-HPLC (conditions c)

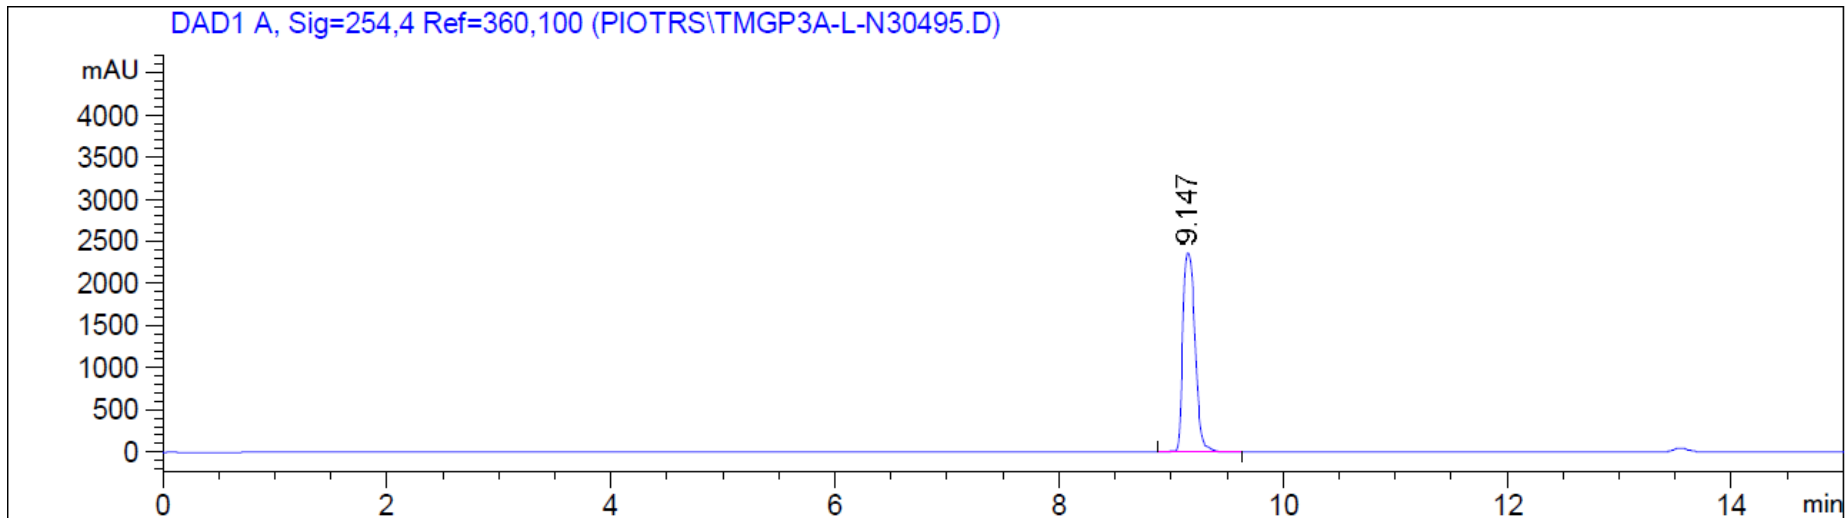

MS (-) ESI (Calc. [M-H]<sup>-</sup> C<sub>26</sub>H<sub>36</sub>N<sub>14</sub>O<sub>18</sub>P<sub>3</sub>: 925.1550, found: 925.15533)

200522\_BW\_66a #52-97 RT: 0.52-0.99 AV: 46 NL: 2.14E6  
T: FTMS - p ESI Full ms [150.0000-2000.0000]

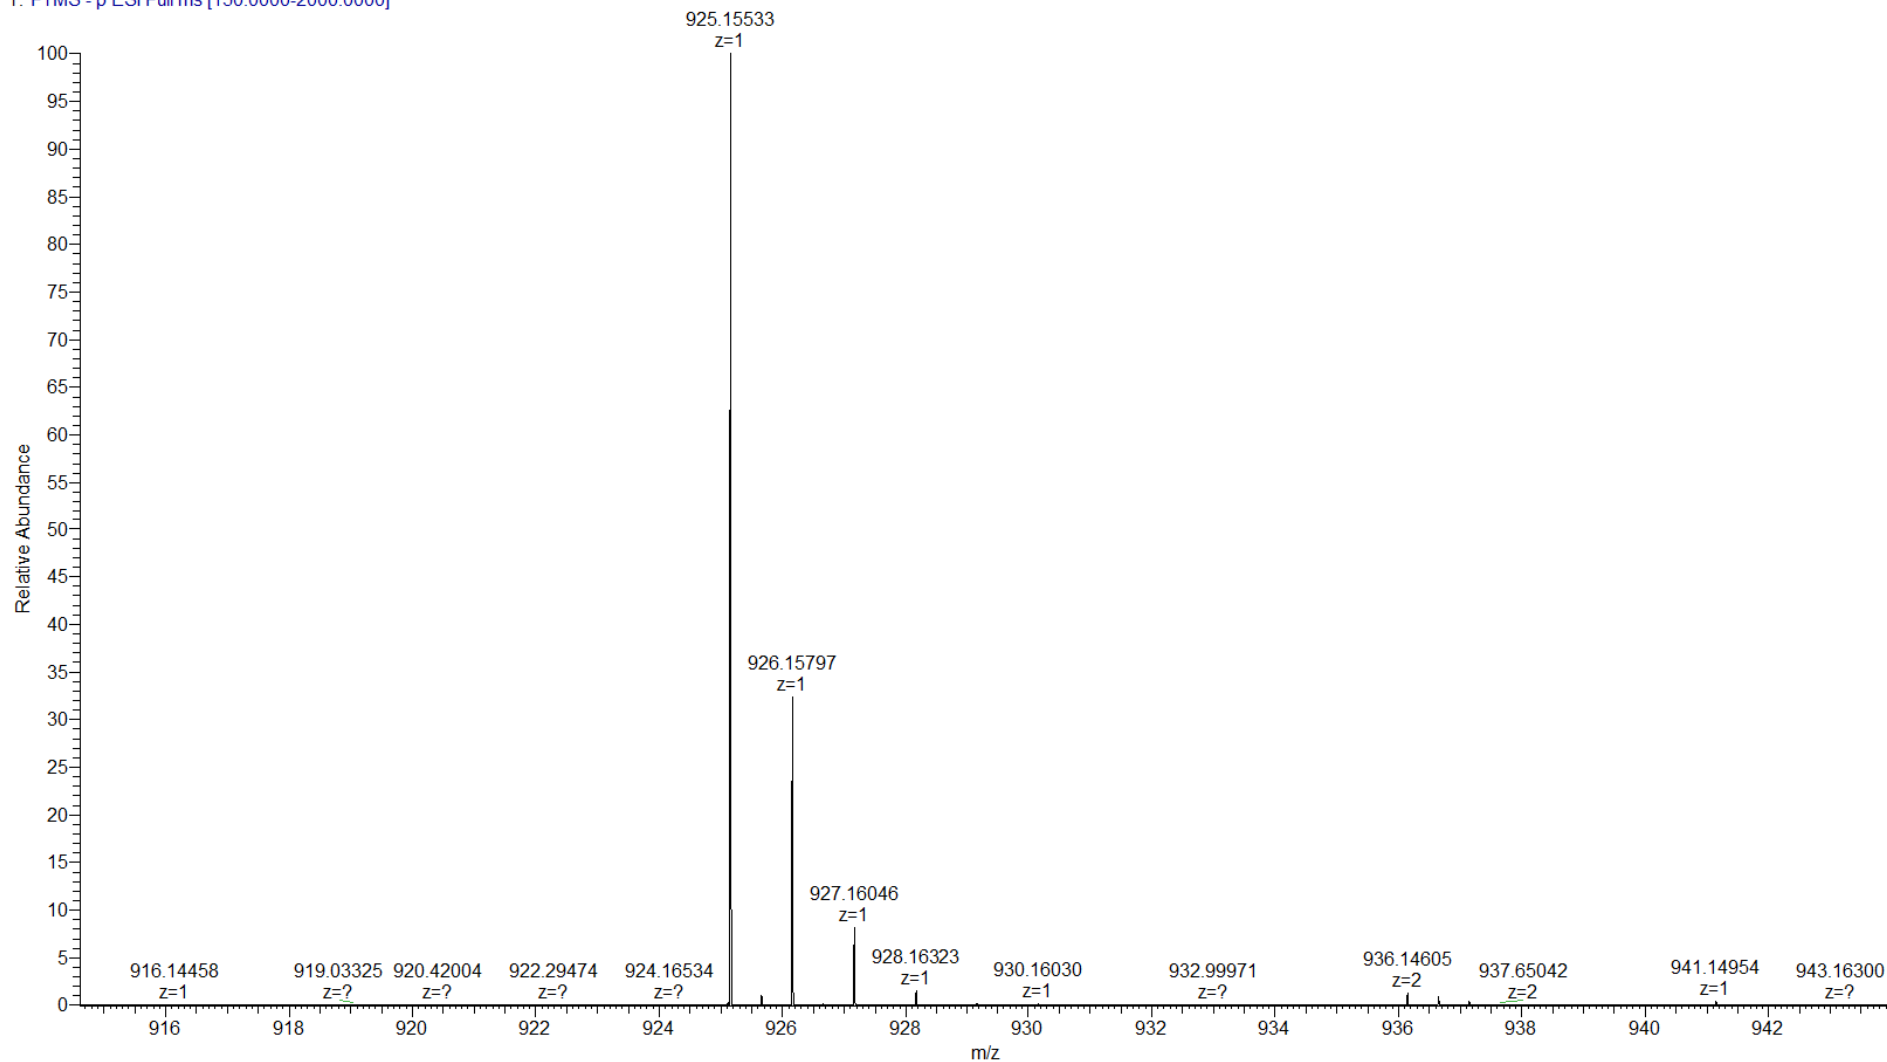

<sup>1</sup>H NMR (500 MHz, D<sub>2</sub>O, 25°C)

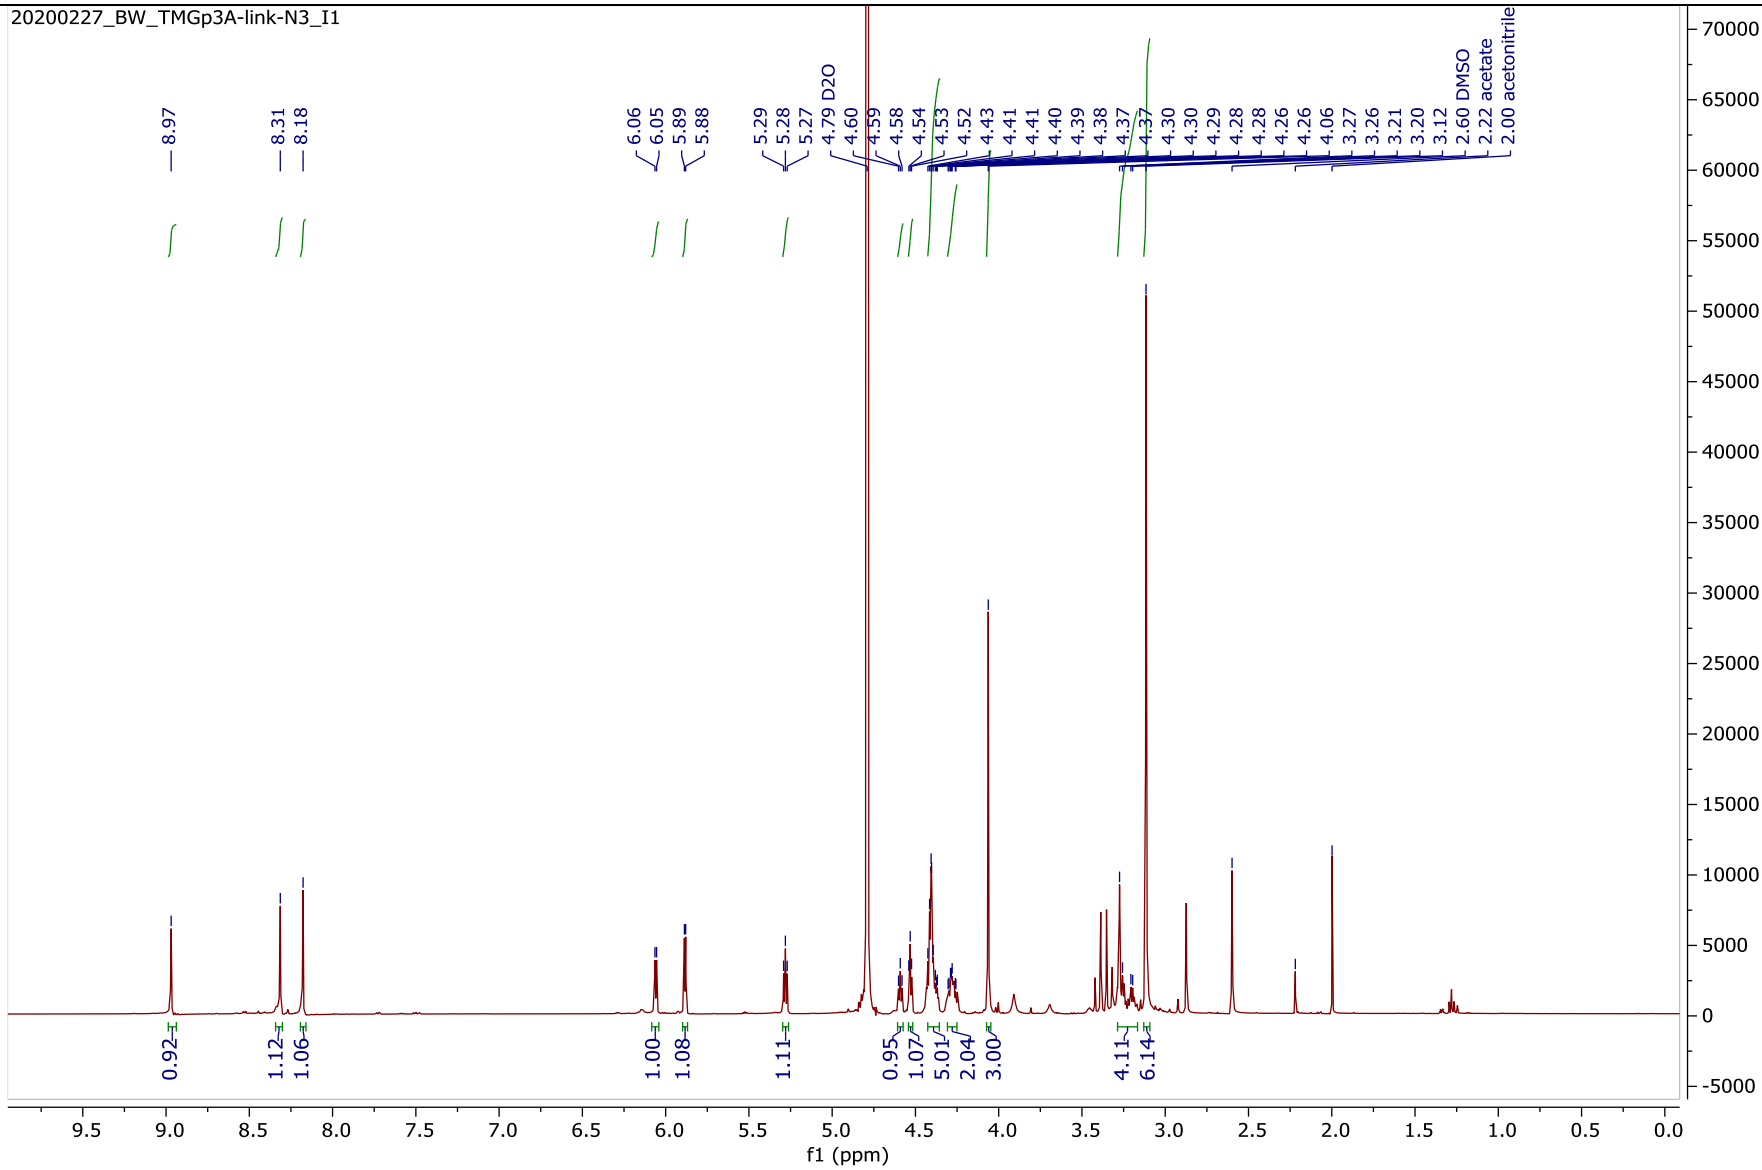

COSY NMR

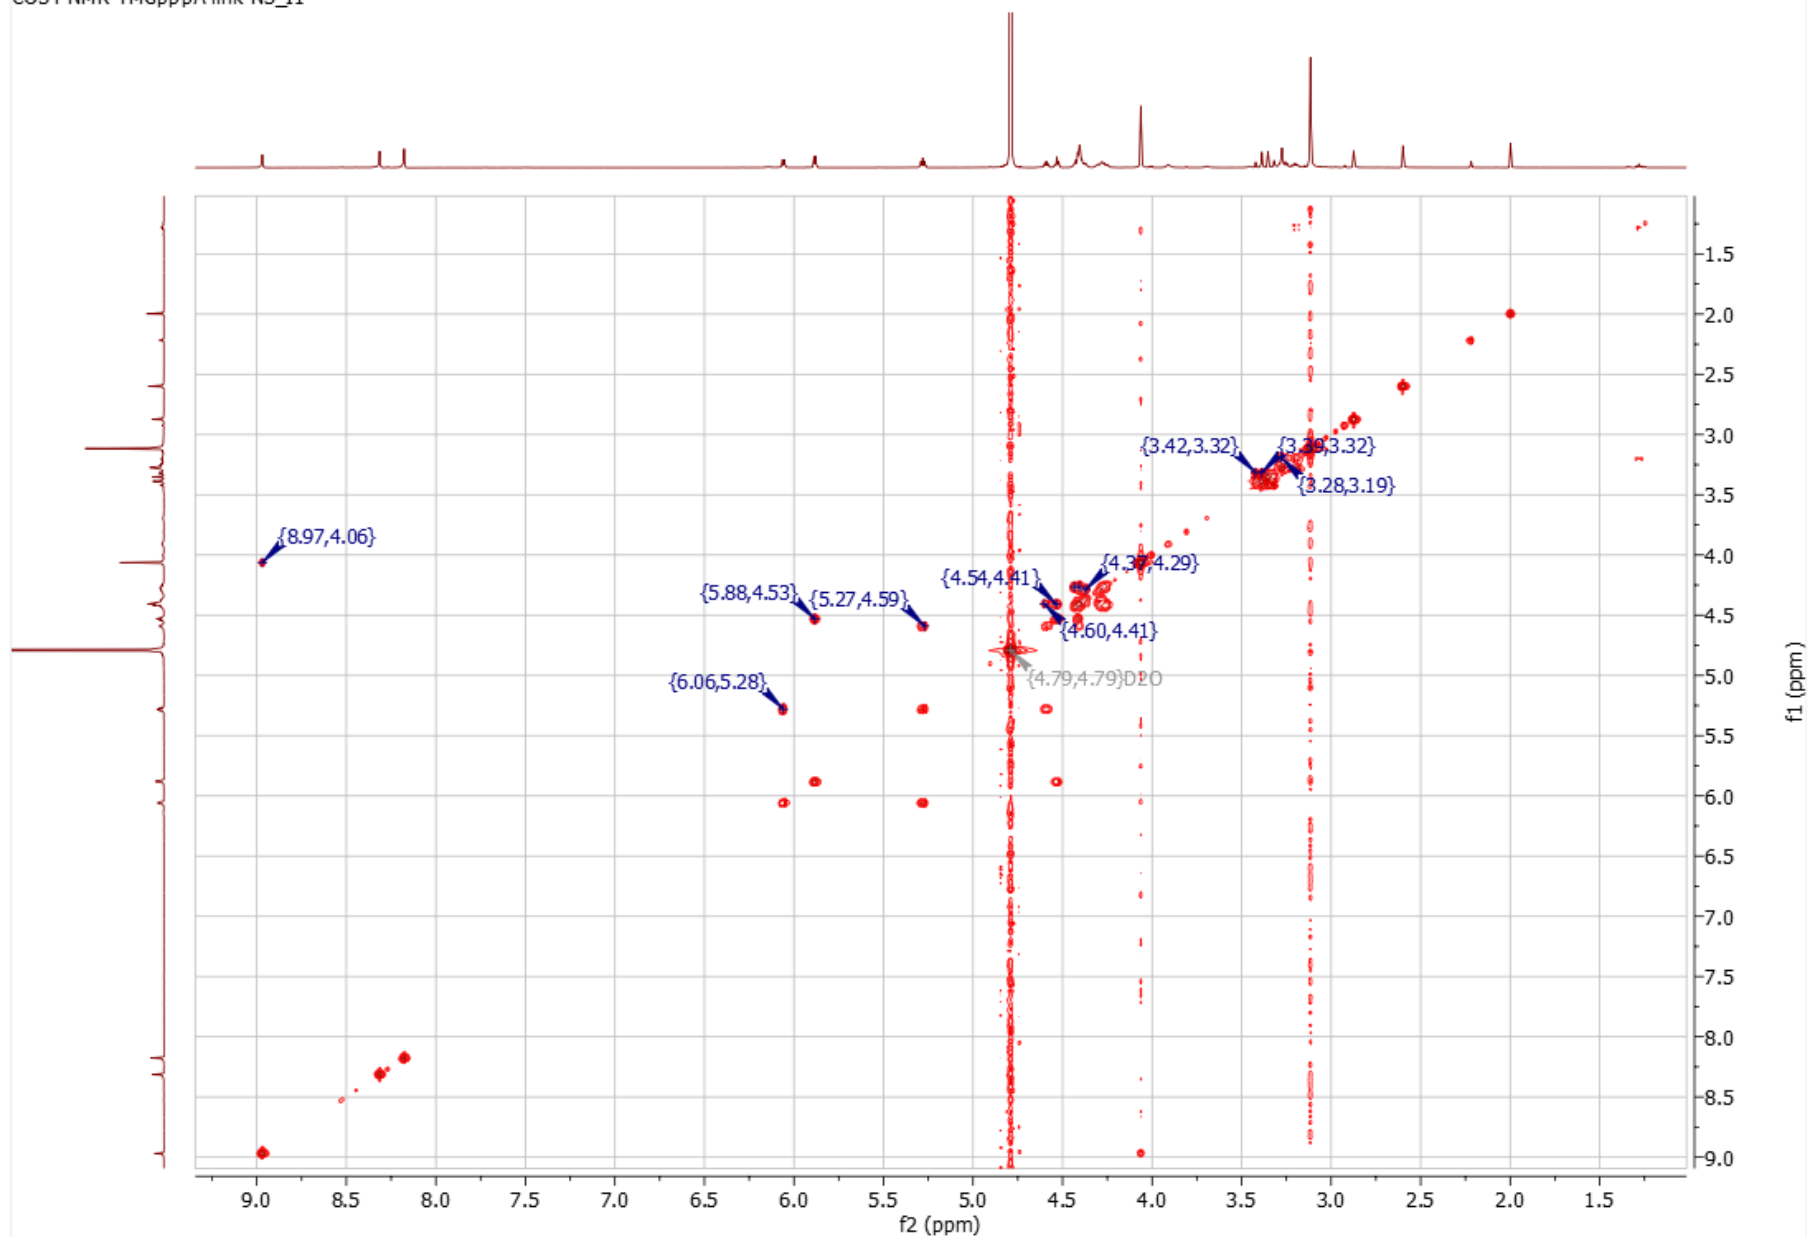

$^{31}\text{P}$  NMR (202 MHz,  $\text{D}_2\text{O}$ ,  $\text{H}_3\text{PO}_4$ , 25°C)

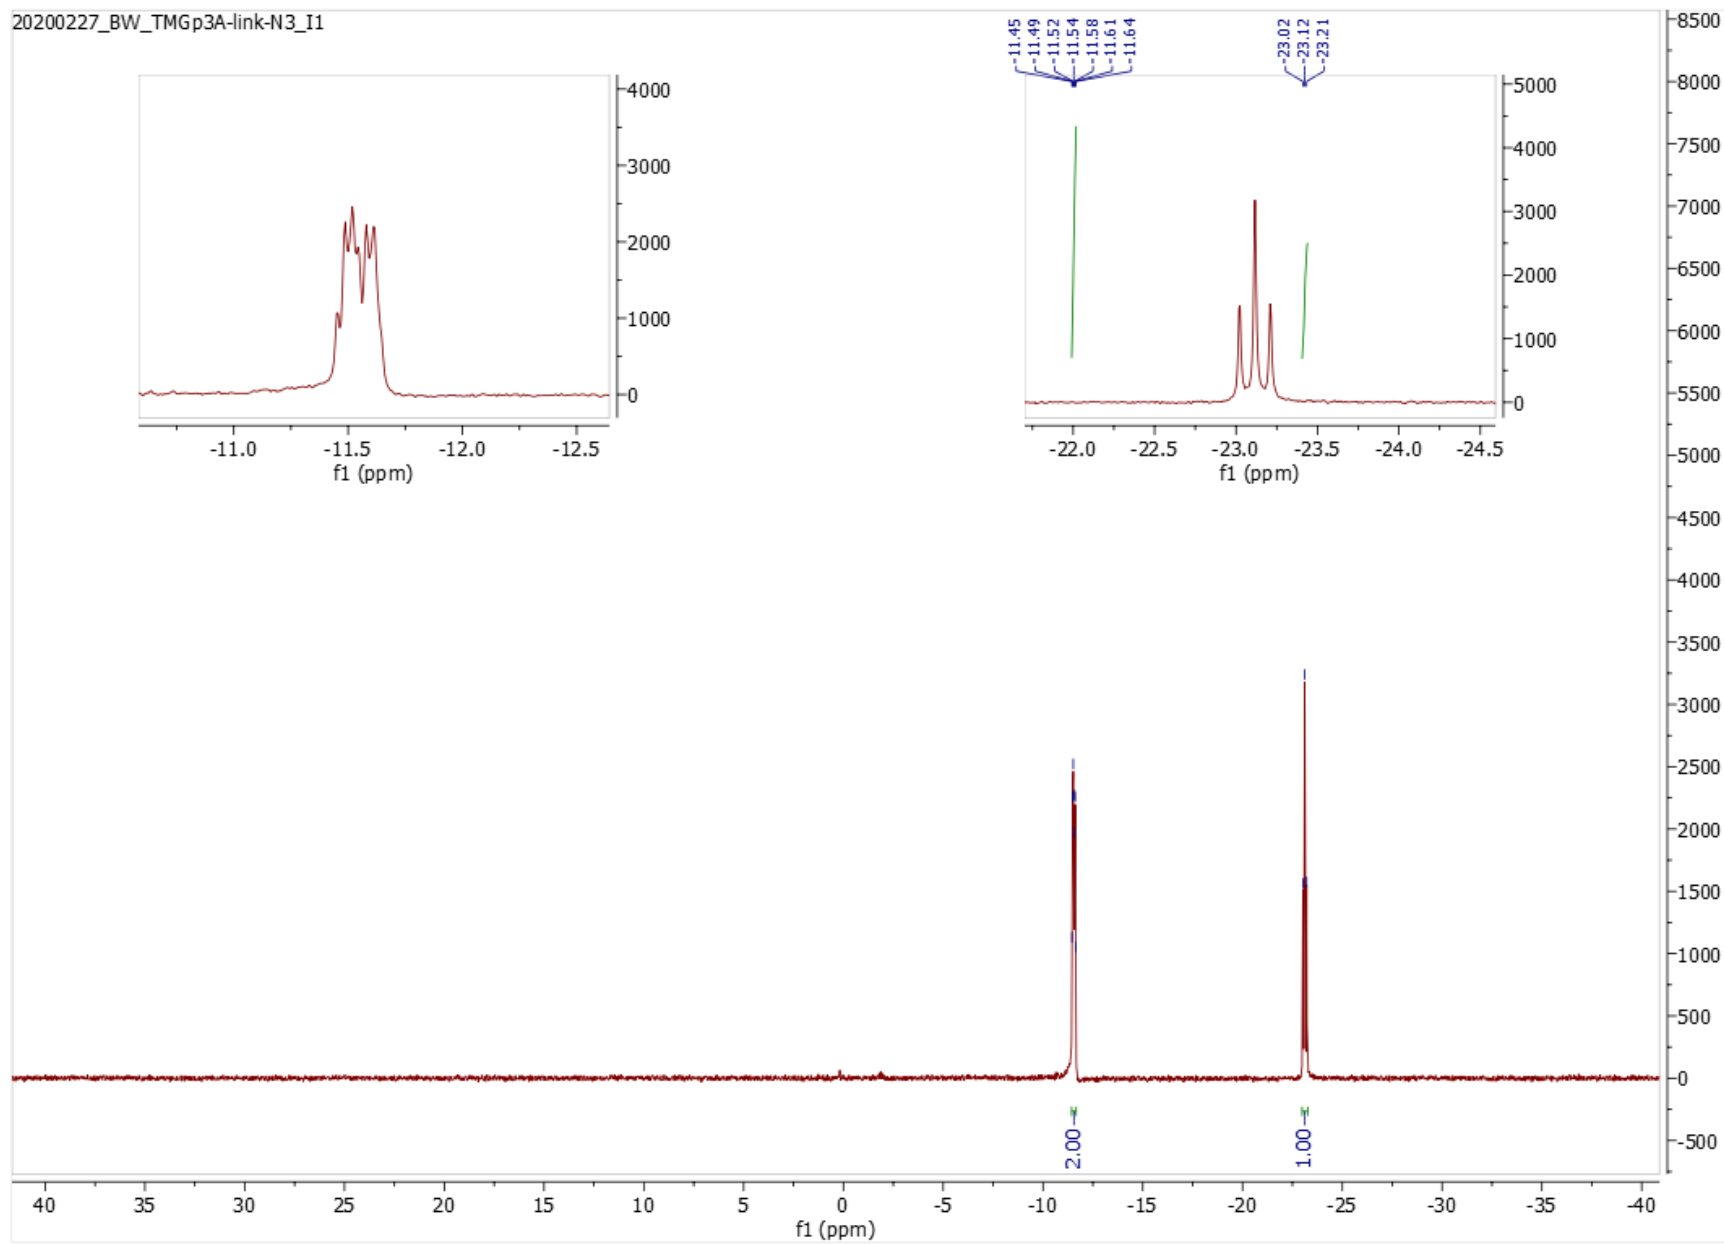



Compound 4-3': TMGpppA-3'-O-C(O)-NH-CH<sub>2</sub>-CH<sub>2</sub>-N<sub>3</sub> (NH<sub>4</sub><sup>+</sup> salt)

Chemical structure

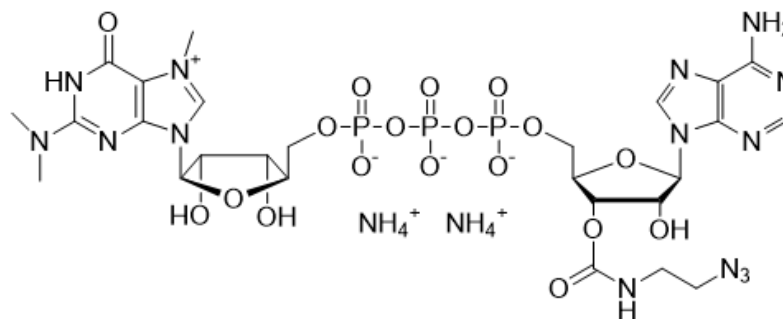

RP-HPLC (conditions c)

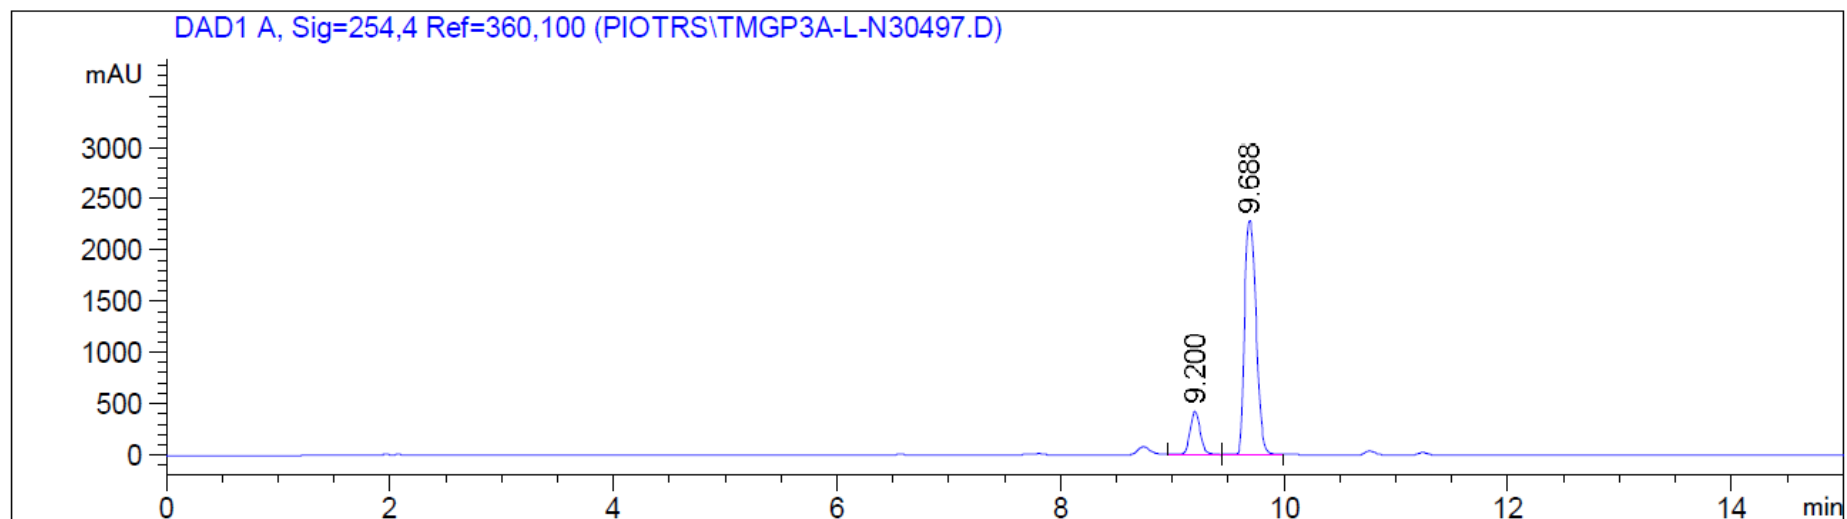

MS (-) ESI (Calc. [M-H]<sup>-</sup> C<sub>26</sub>H<sub>36</sub>N<sub>4</sub>O<sub>18</sub>P<sub>3</sub><sup>-</sup>: 925.5758, found: 925.15553)

200522\_BW\_66b #95-138 RT: 0.96-1.41 AV: 44 NL: 2.40E6  
T: FTMS - p ESI Full ms [150.0000-2000.0000]

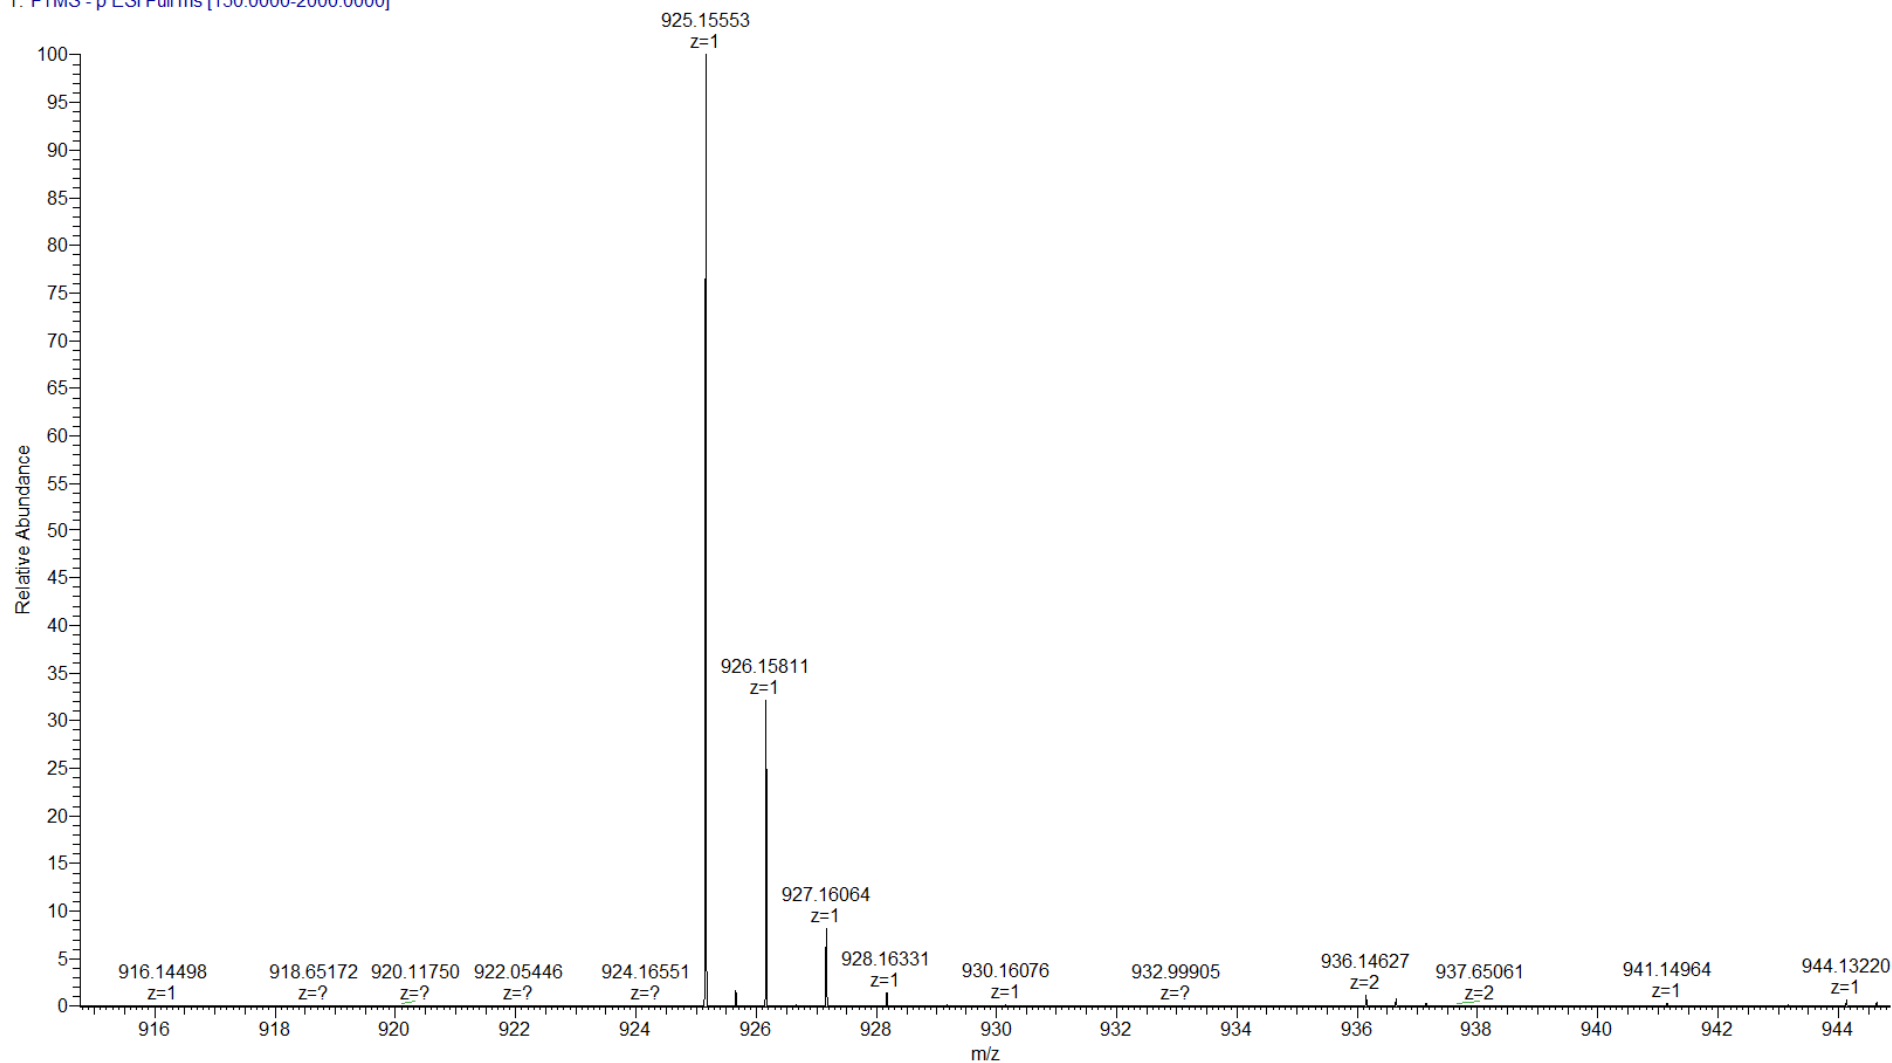

<sup>1</sup>H NMR (500 MHz, D<sub>2</sub>O, 25°C)

20200227\_BW\_TMgp3A-link-N3\_I2

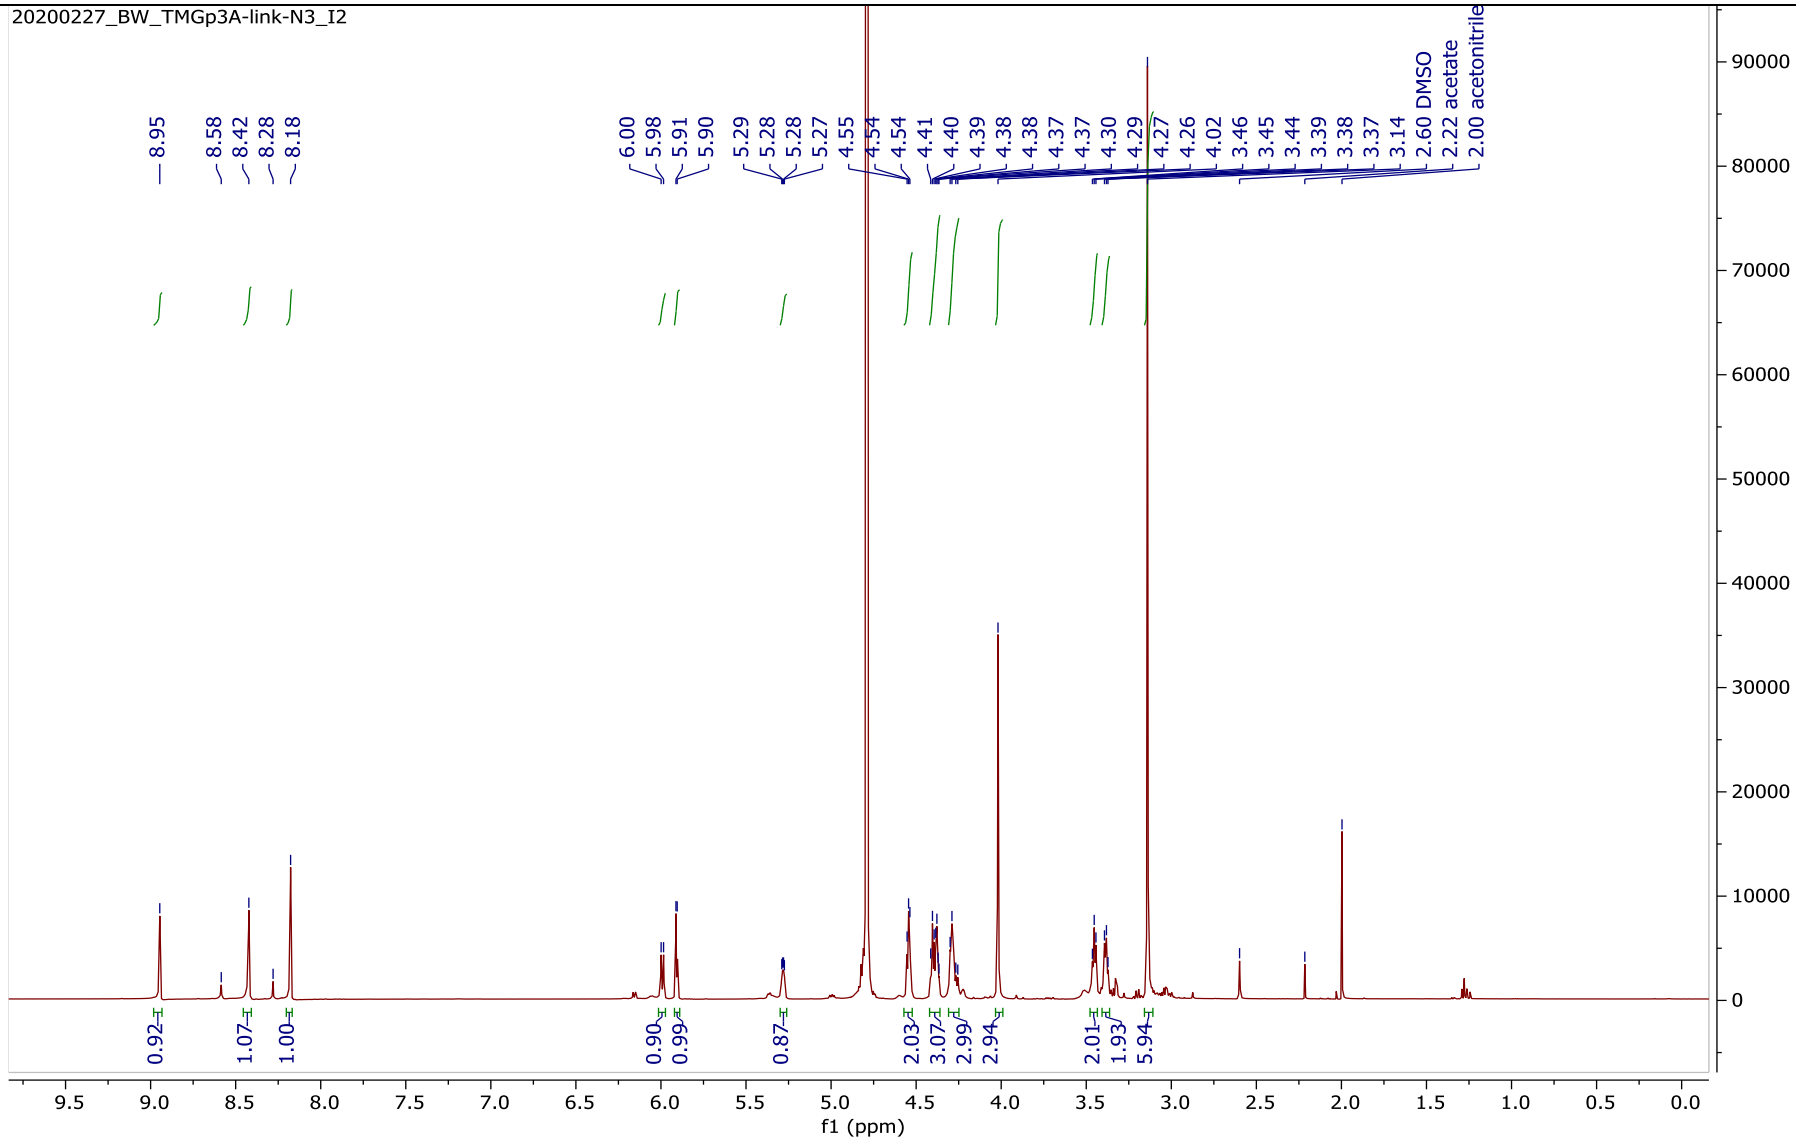

COSY NMR

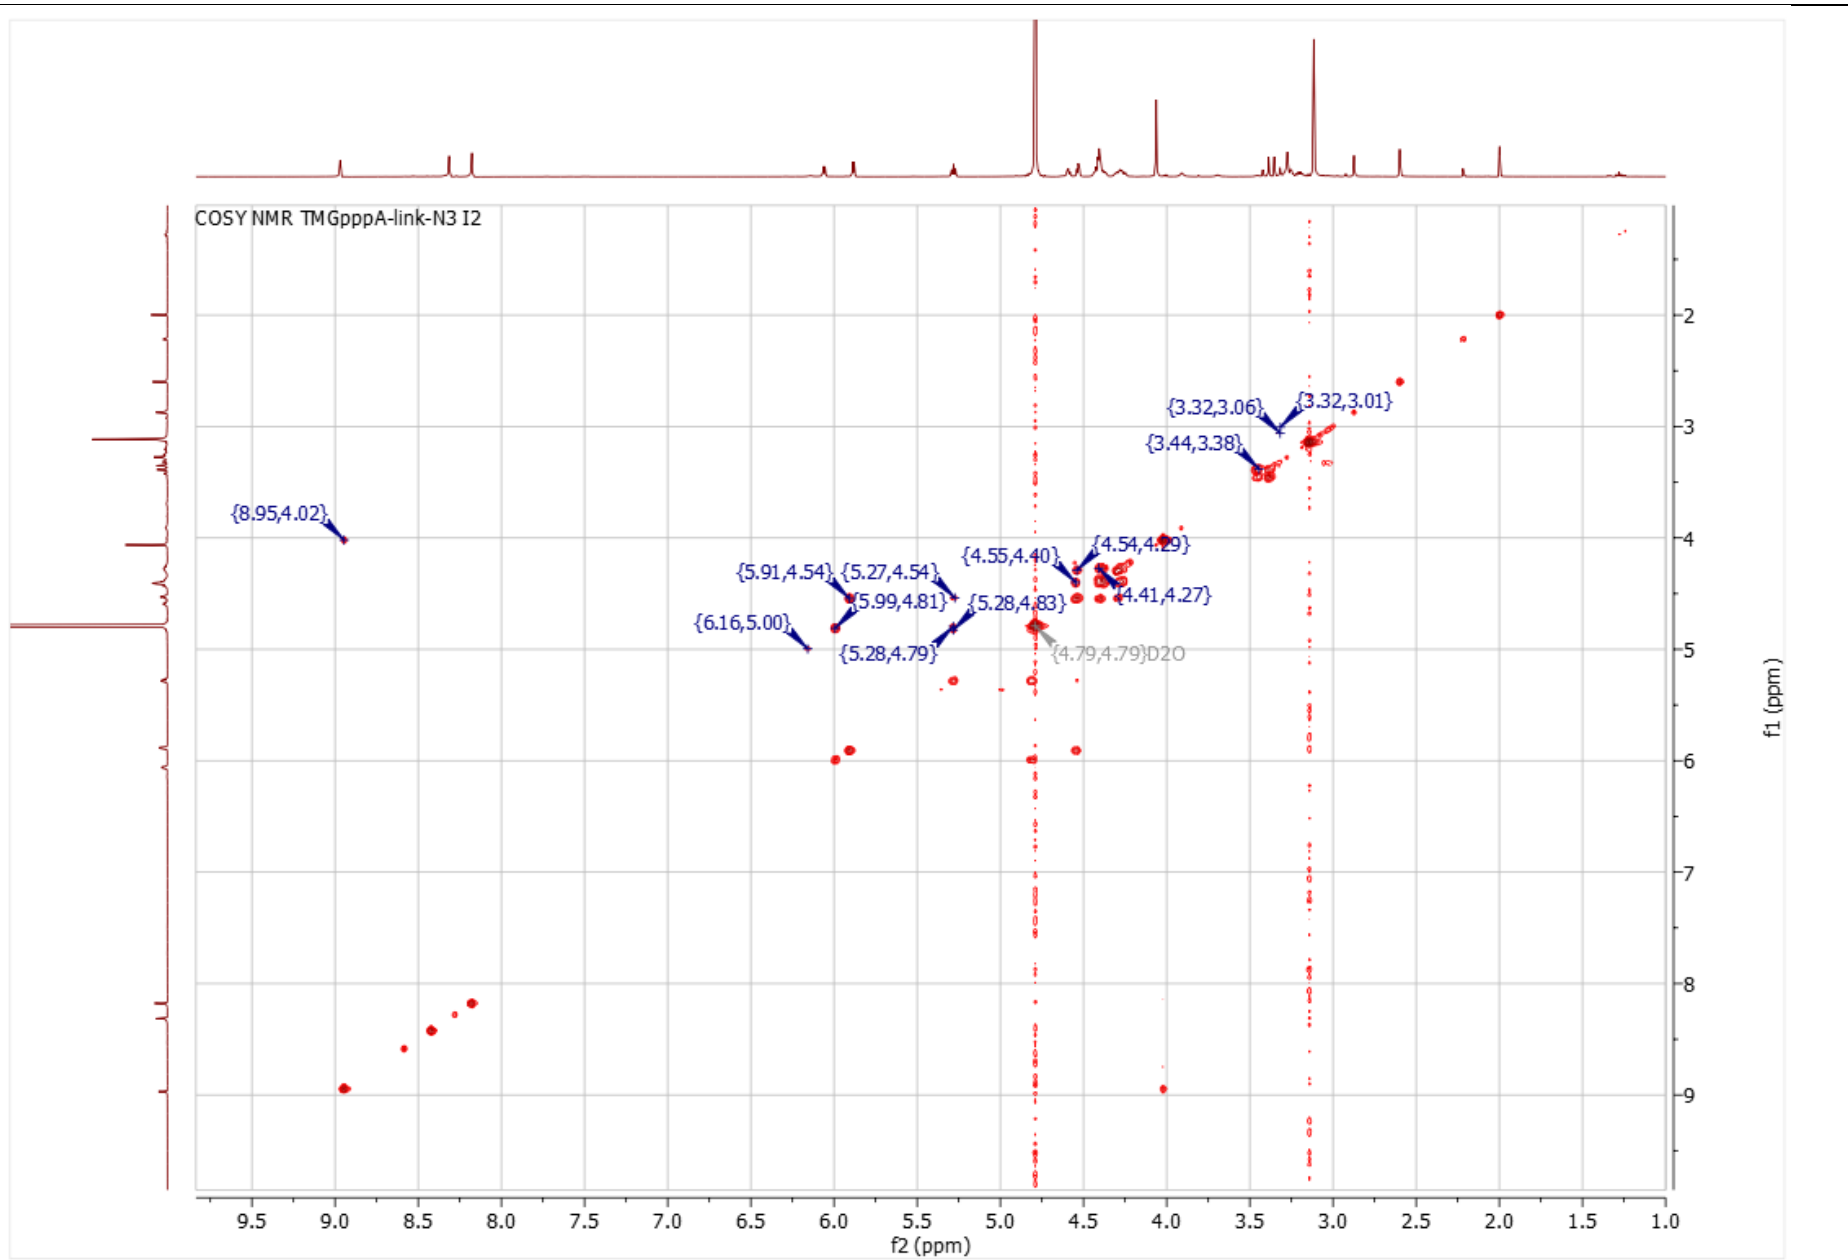

$^{31}\text{P}$  NMR (202 MHz,  $\text{D}_2\text{O}$ ,  $\text{H}_3\text{PO}_4$ , 25°C)

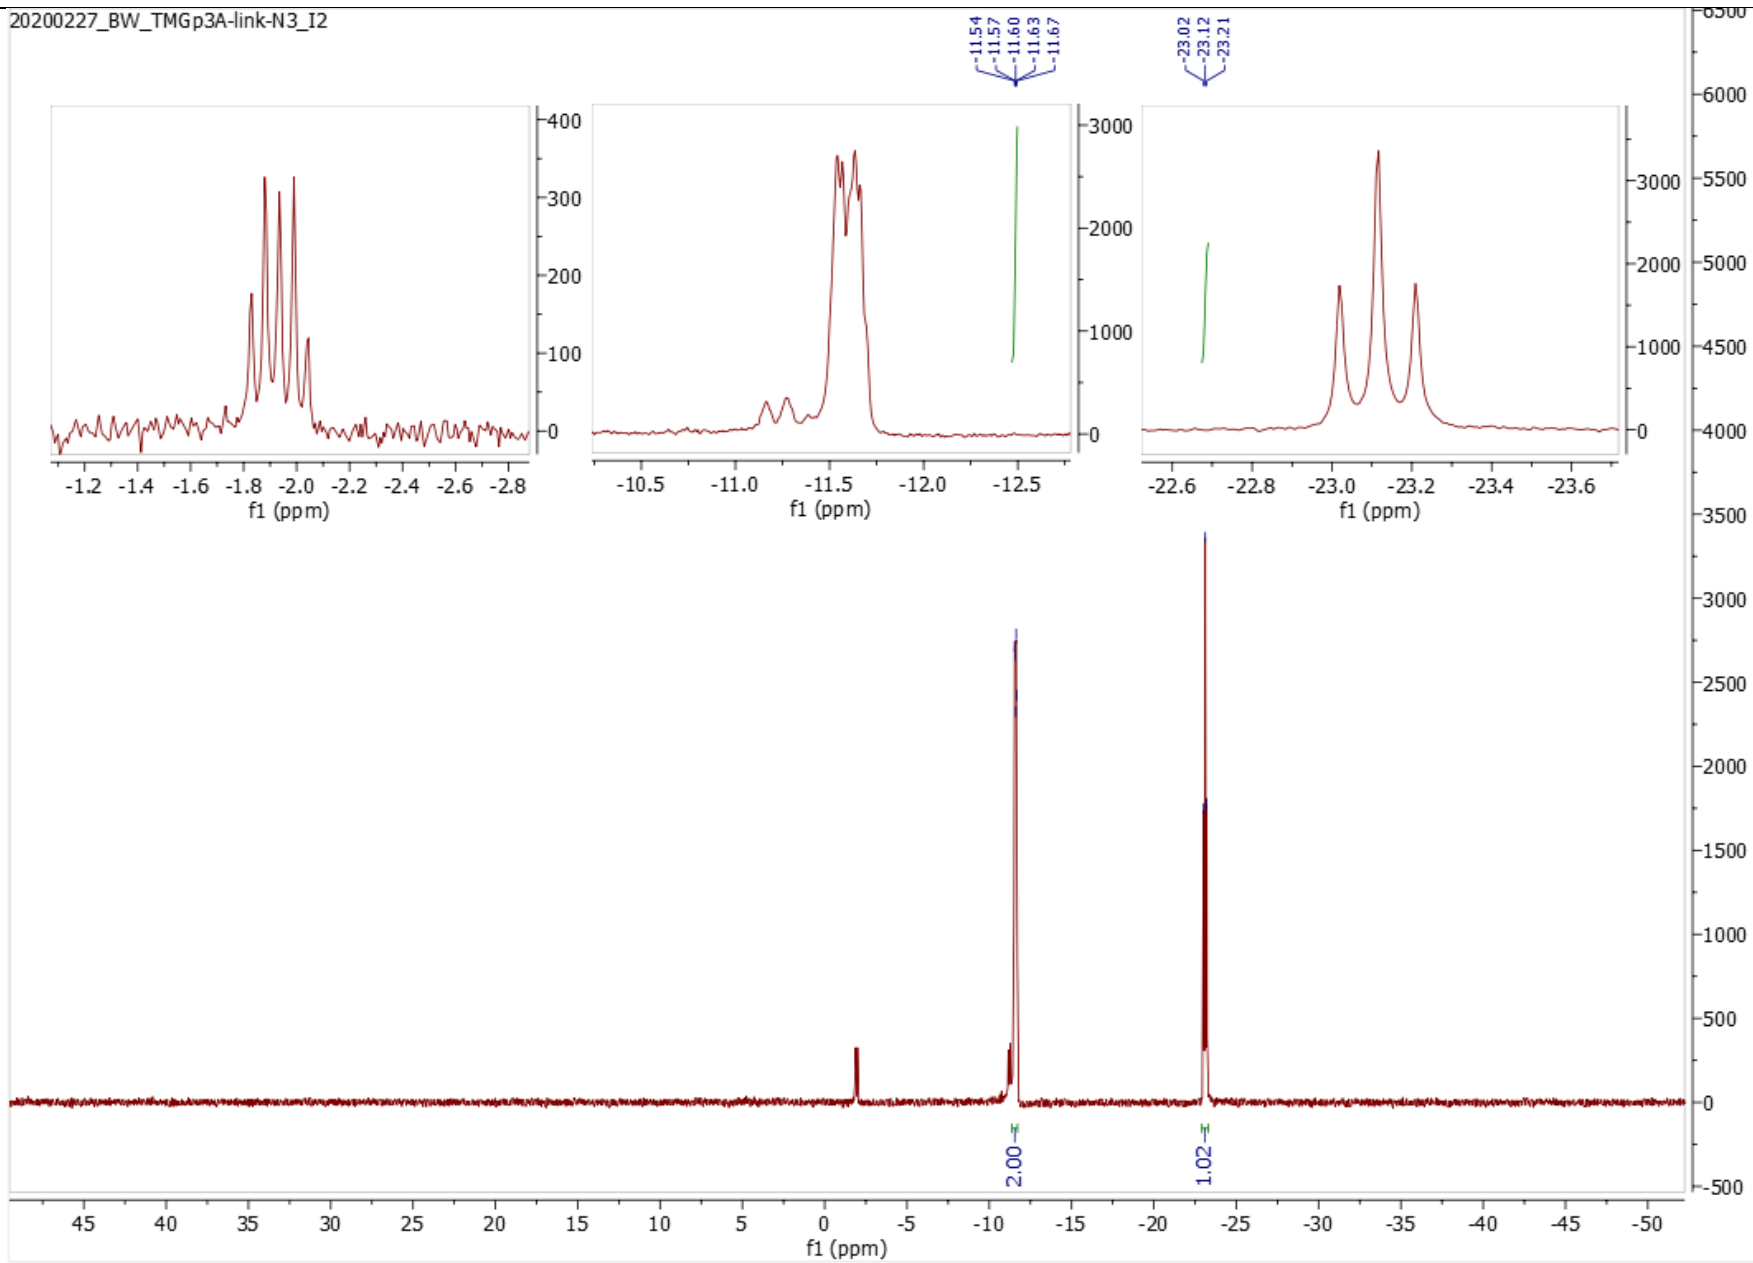

Compound 5-2': TMGppppG-2'-O-C(O)-NH-CH<sub>2</sub>CH<sub>2</sub>-N<sub>3</sub> (NH<sub>4</sub><sup>+</sup> salt)

Chemical structure

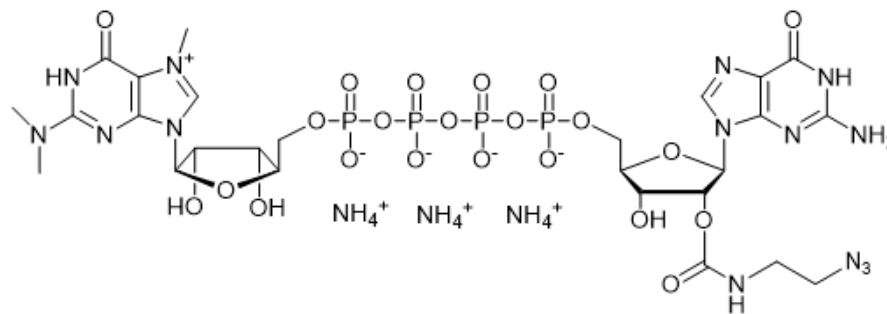

RP-HPLC (conditions c)

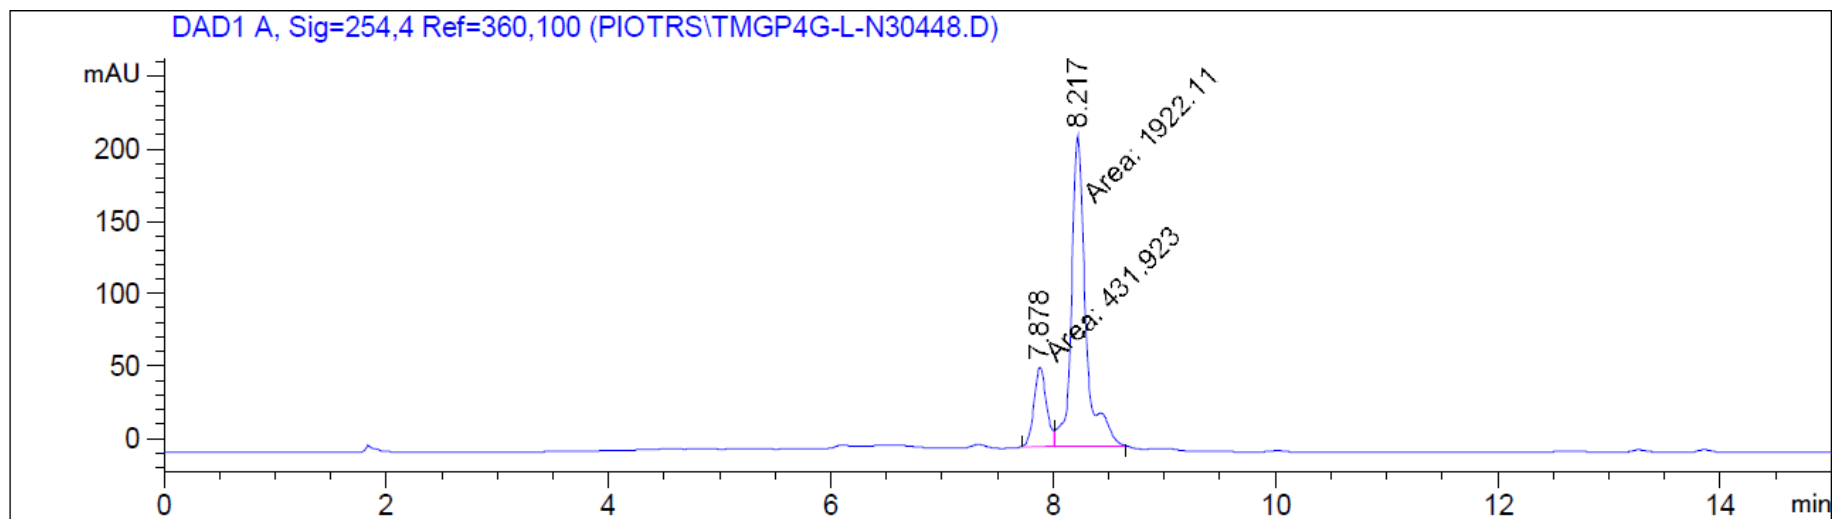

MS (-) ESI (Calc. [M-H]<sup>-</sup> C<sub>26</sub>H<sub>37</sub>N<sub>14</sub>O<sub>22</sub>P<sub>4</sub>; 1021.1163, found: 1021.11769)

200702\_PSU\_01 #5-51 RT: 0.05-0.51 AV: 47 NL: 2.74E5  
T: FTMS - p ESI Full ms [150.0000-2000.0000]

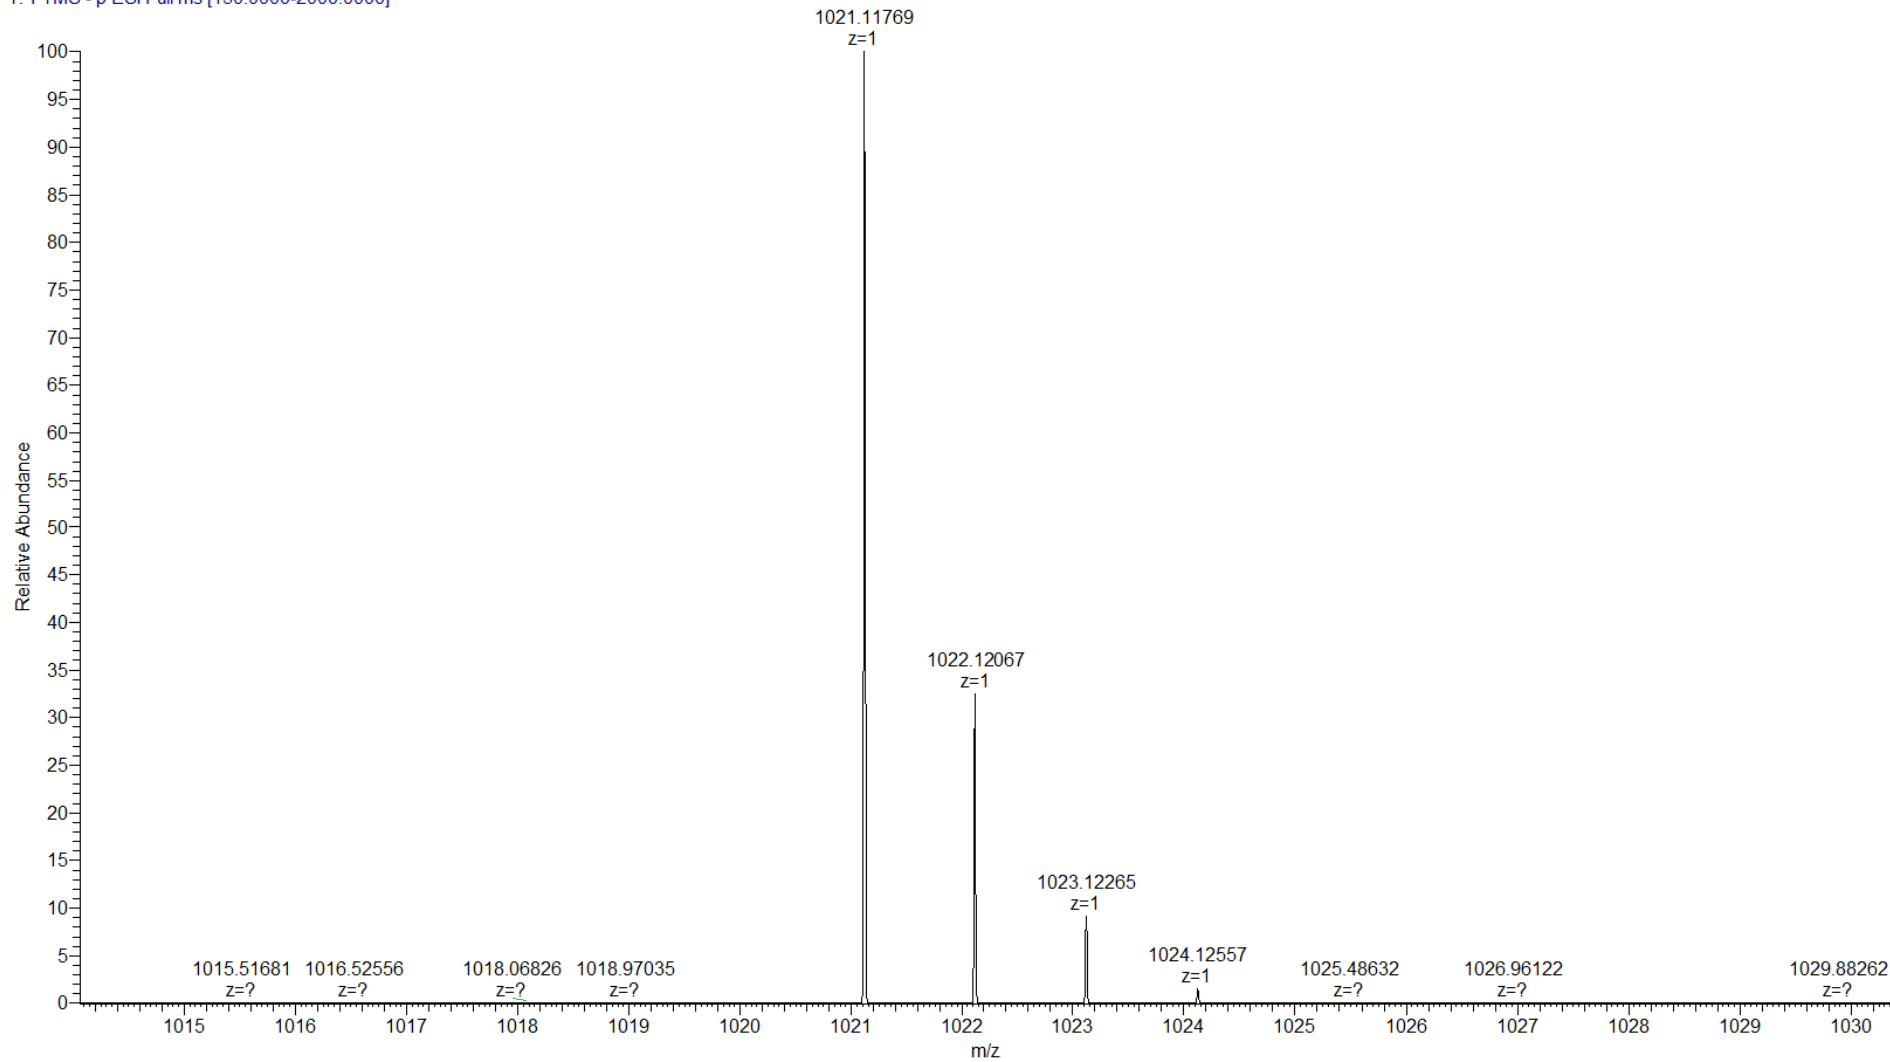

<sup>1</sup>H NMR (500 MHz, D<sub>2</sub>O, 25°C)

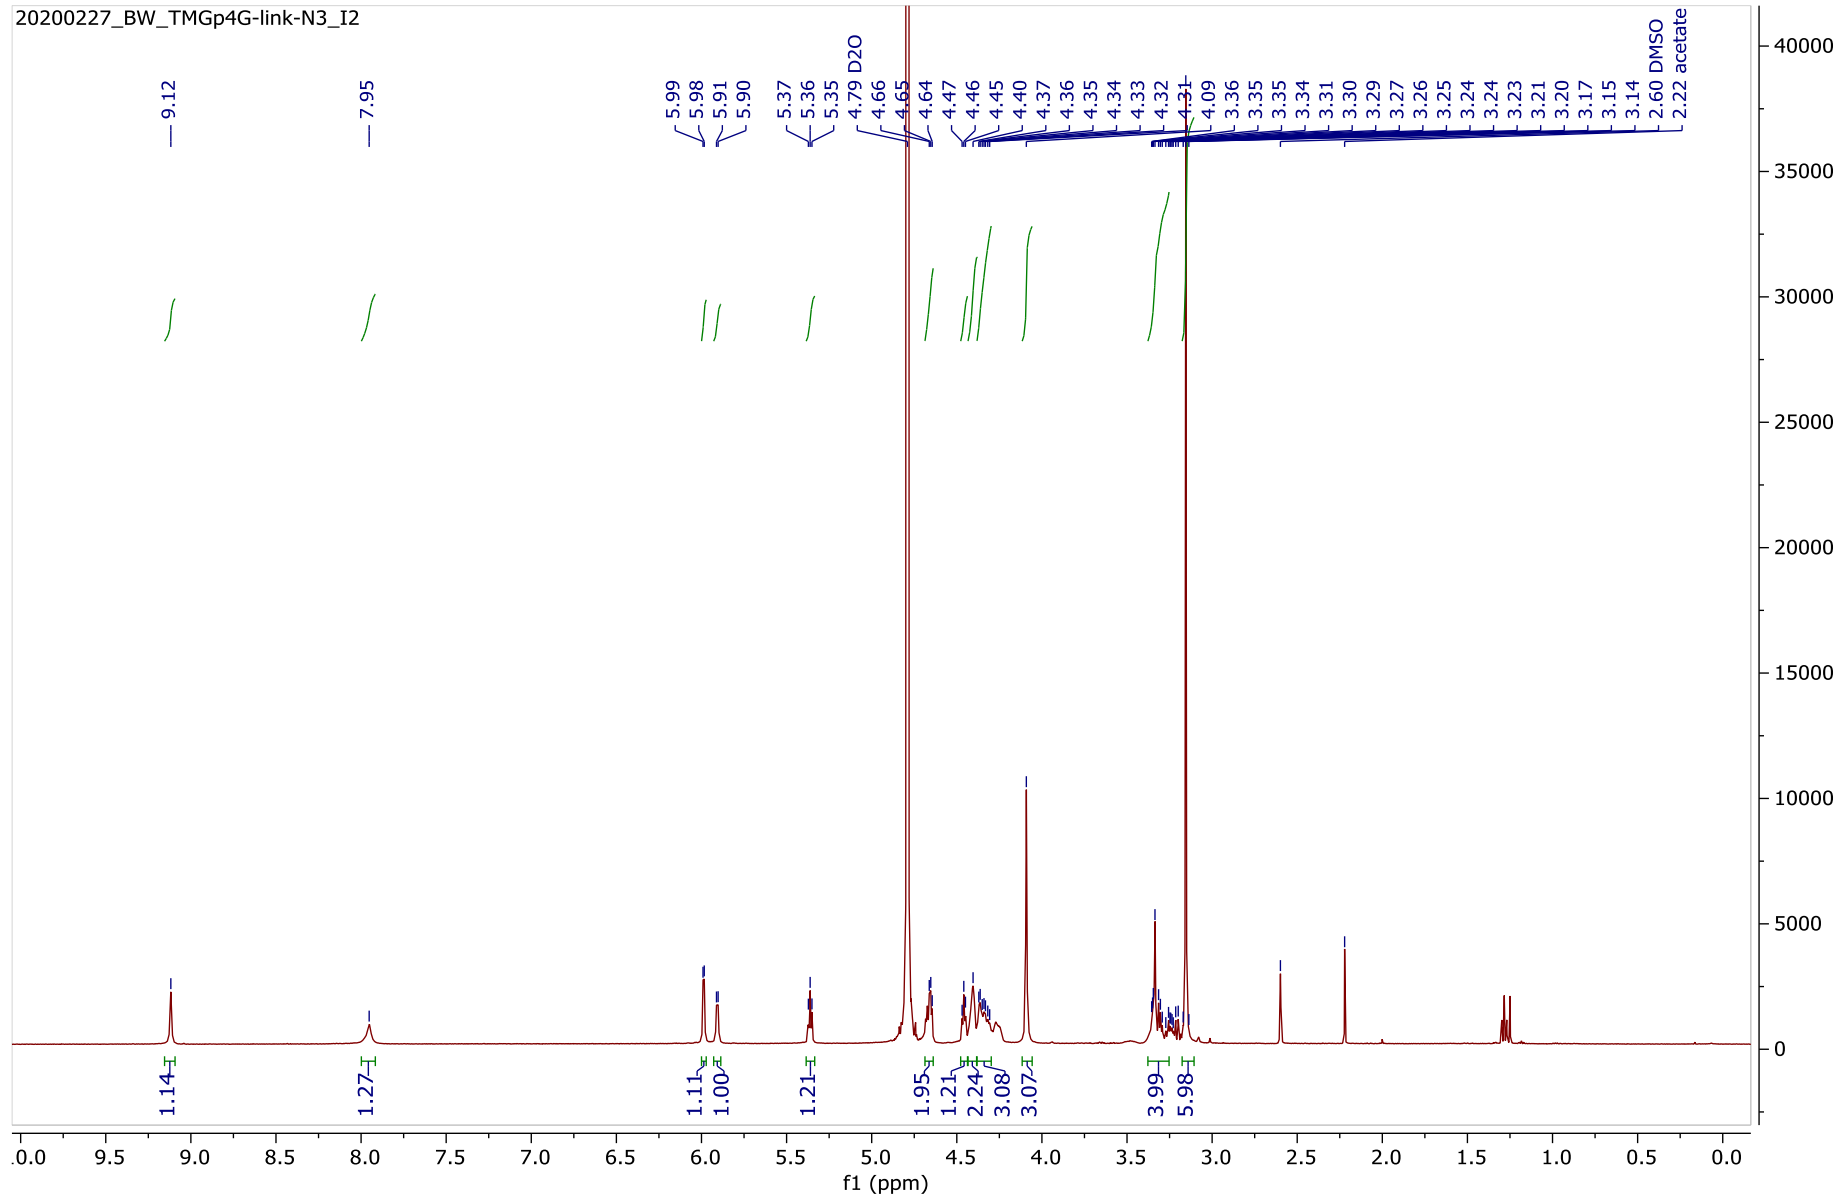



COSY NMR

COSY NMR TMGppppG-2p-link-N3 (I2)

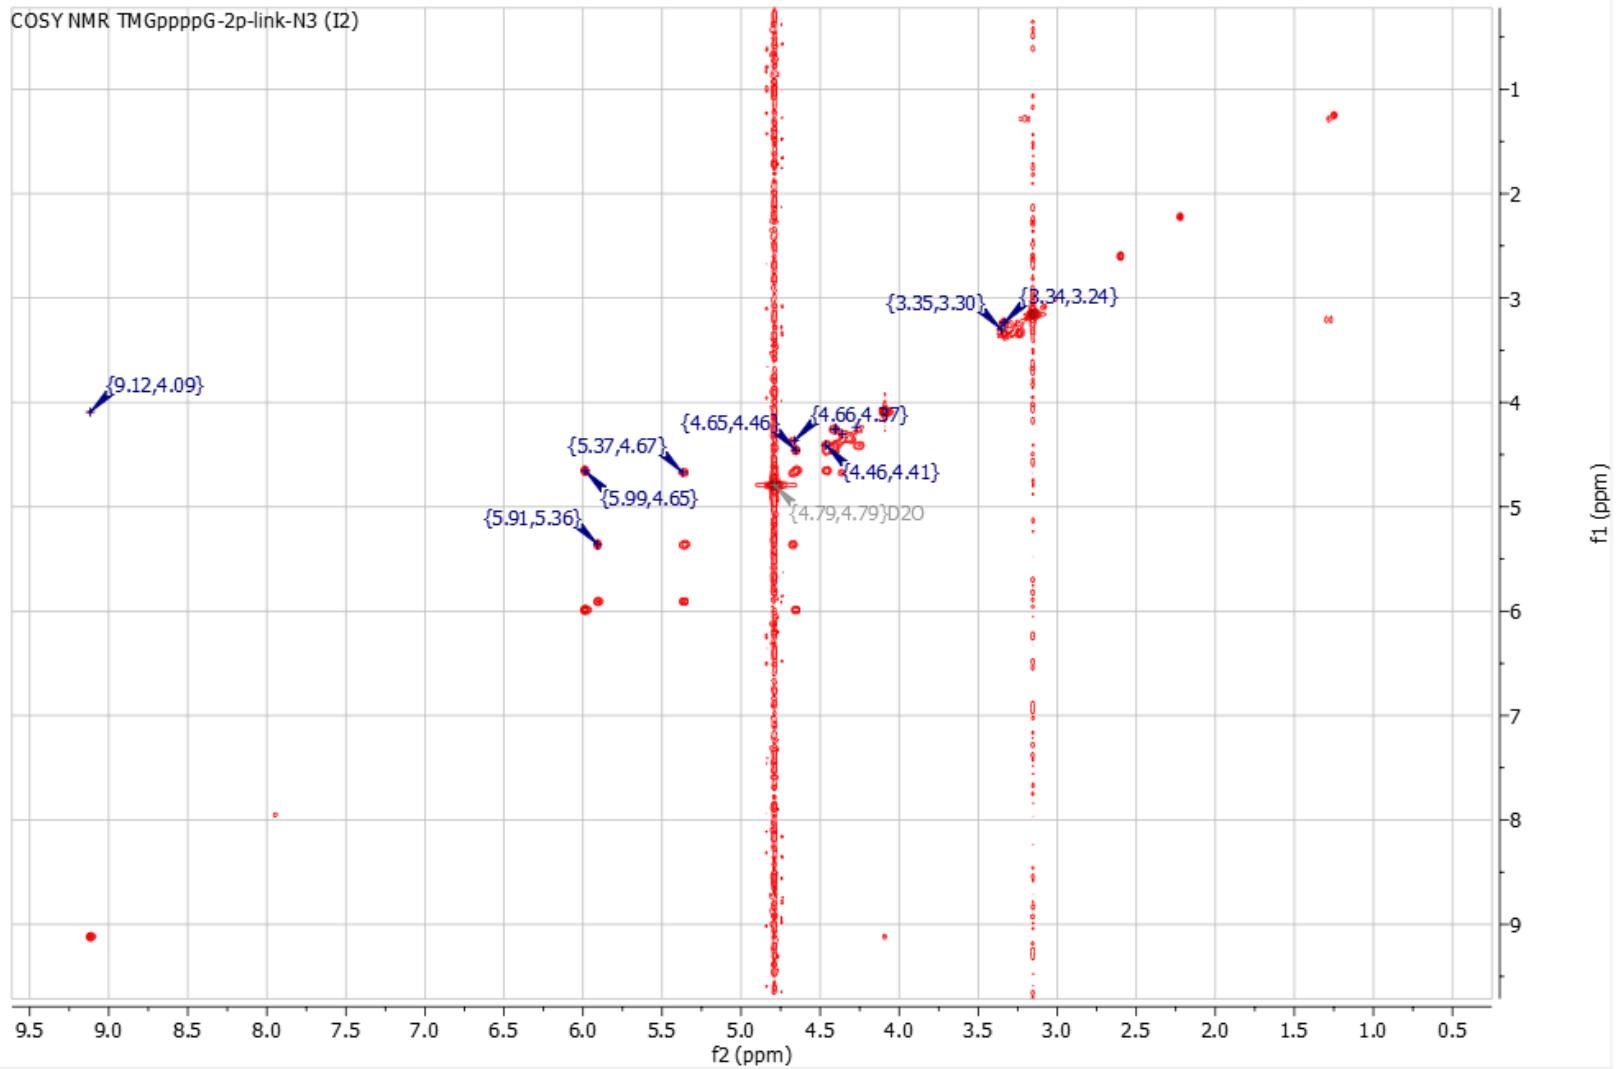

$^{31}\text{P}$  NMR (203 MHz,  $\text{D}_2\text{O}$ ,  $\text{H}_3\text{PO}_4$ ,  $25^\circ\text{C}$ )

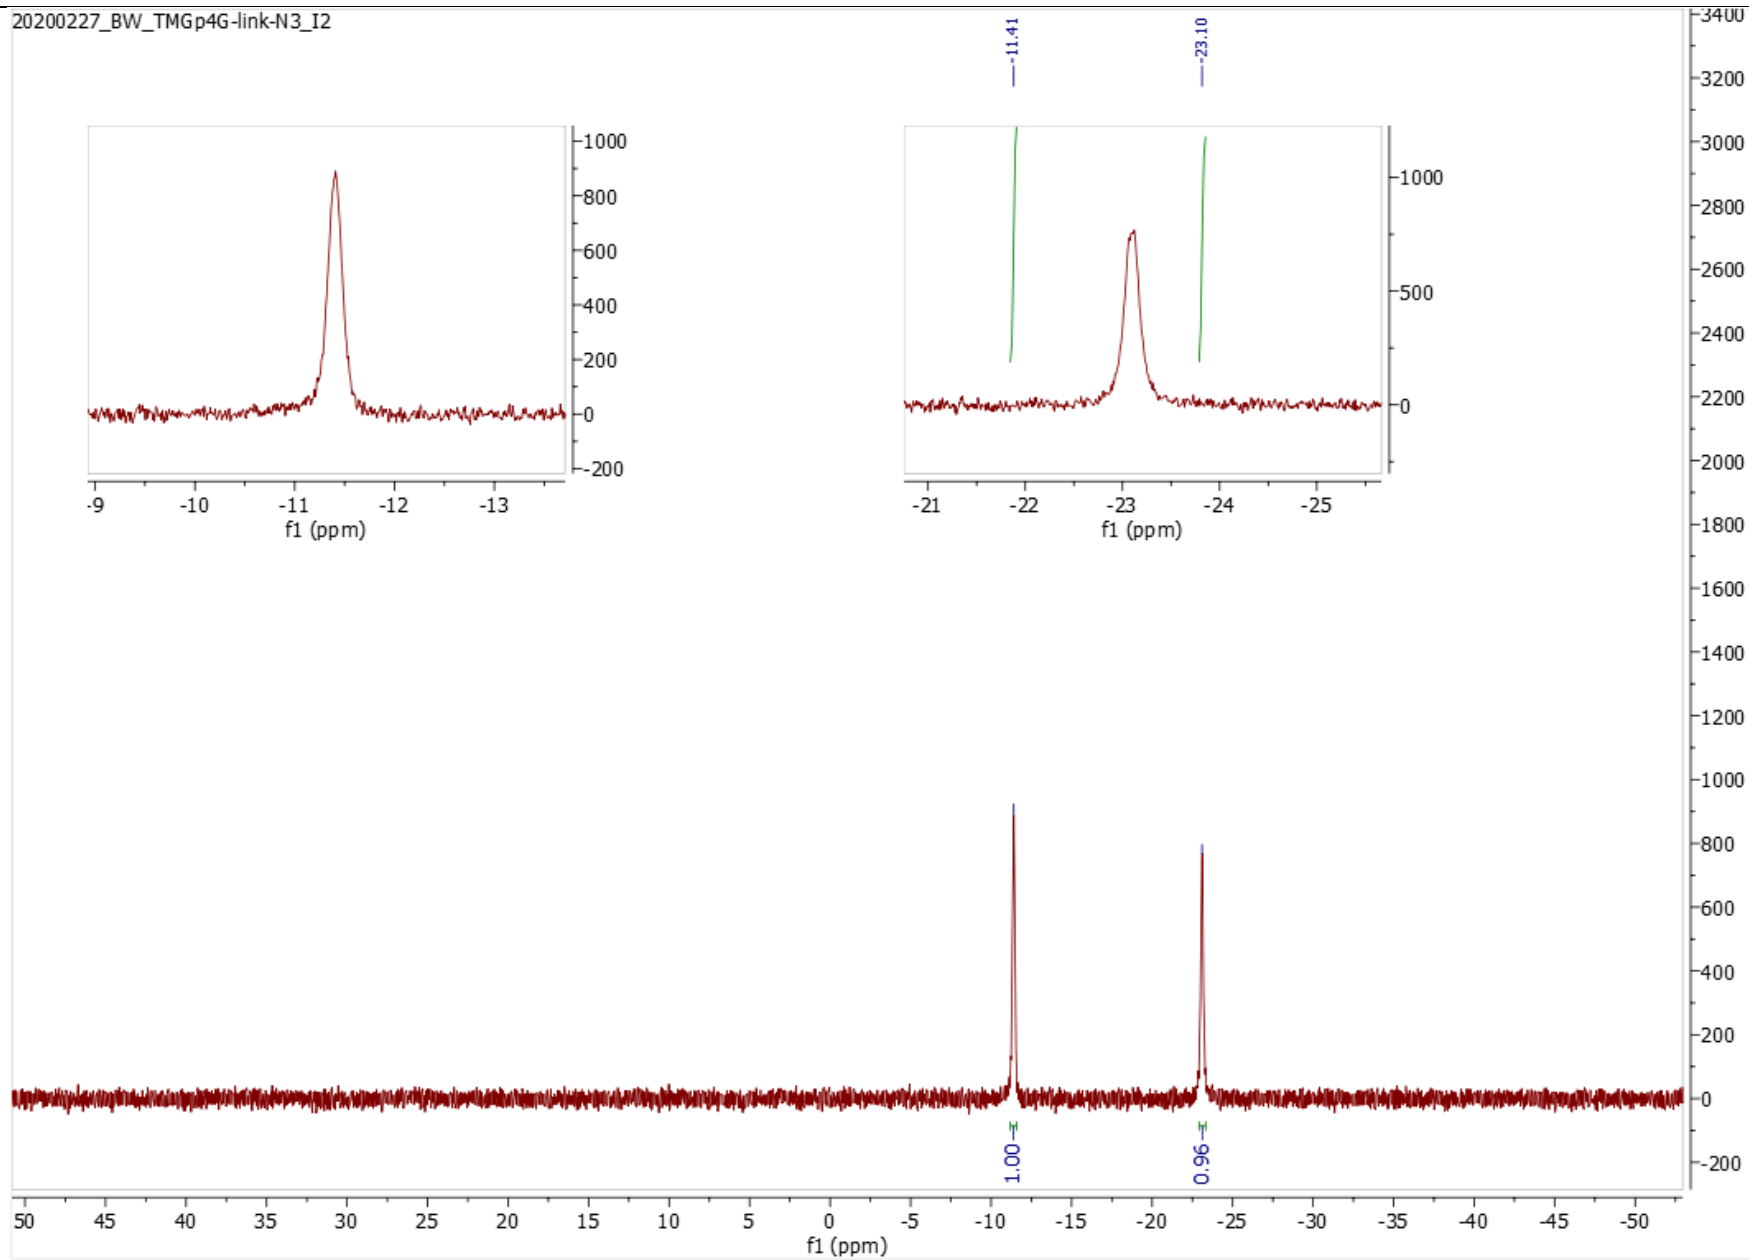

Compound 5-3': TMGppppG-3'-O-C(O)-NH-CH<sub>2</sub>CH<sub>2</sub>-N<sub>3</sub> (NH<sub>4</sub><sup>+</sup> salt)

Chemical structure

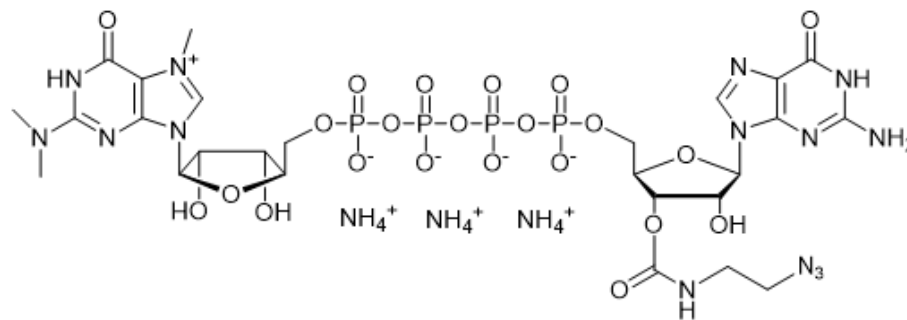

RP-HPLC (conditions c)

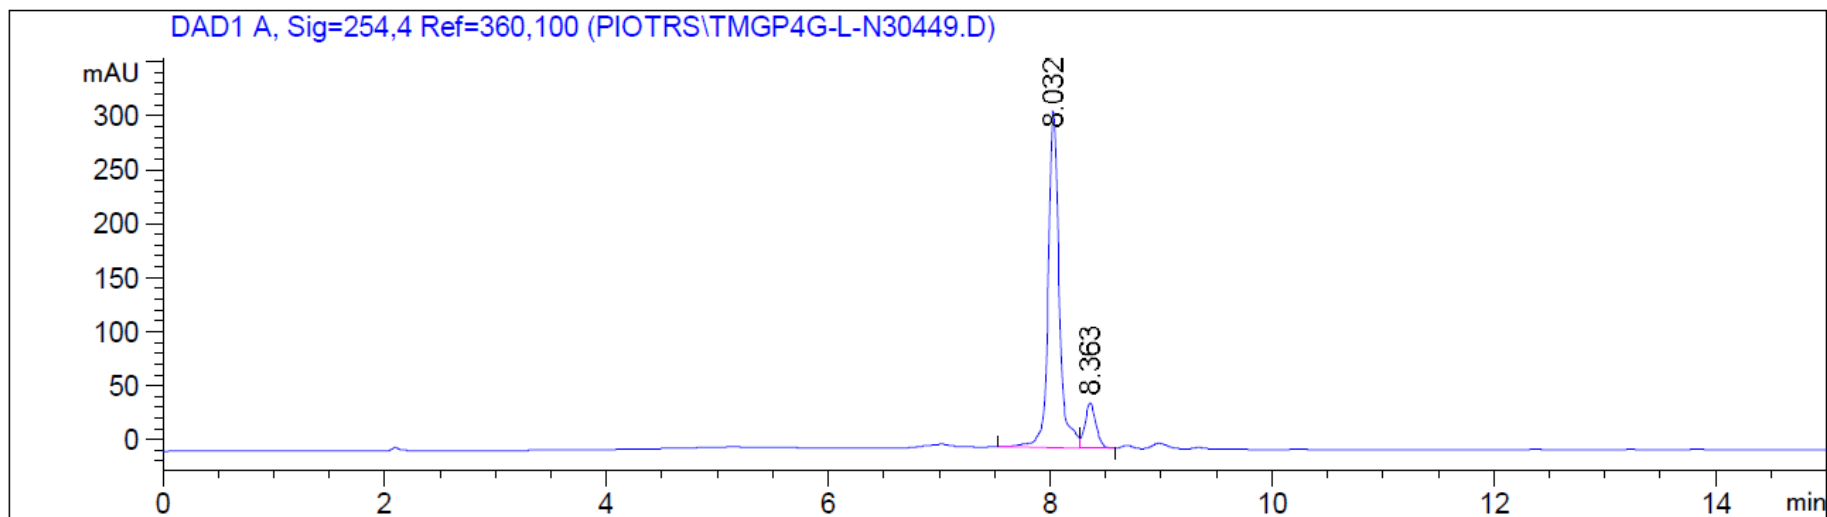

MS (-) ESI (Calc. [M-H]<sup>-</sup> C<sub>26</sub>H<sub>37</sub>N<sub>14</sub>O<sub>22</sub>P<sub>4</sub>; 1021.1163, found: 1021.11740)

200702\_PSU\_02#26-106 RT: 0.25-1.06 AV: 81 NL: 7.21E5  
T: FTMS - p ESI Full ms [150.0000-2000.0000]

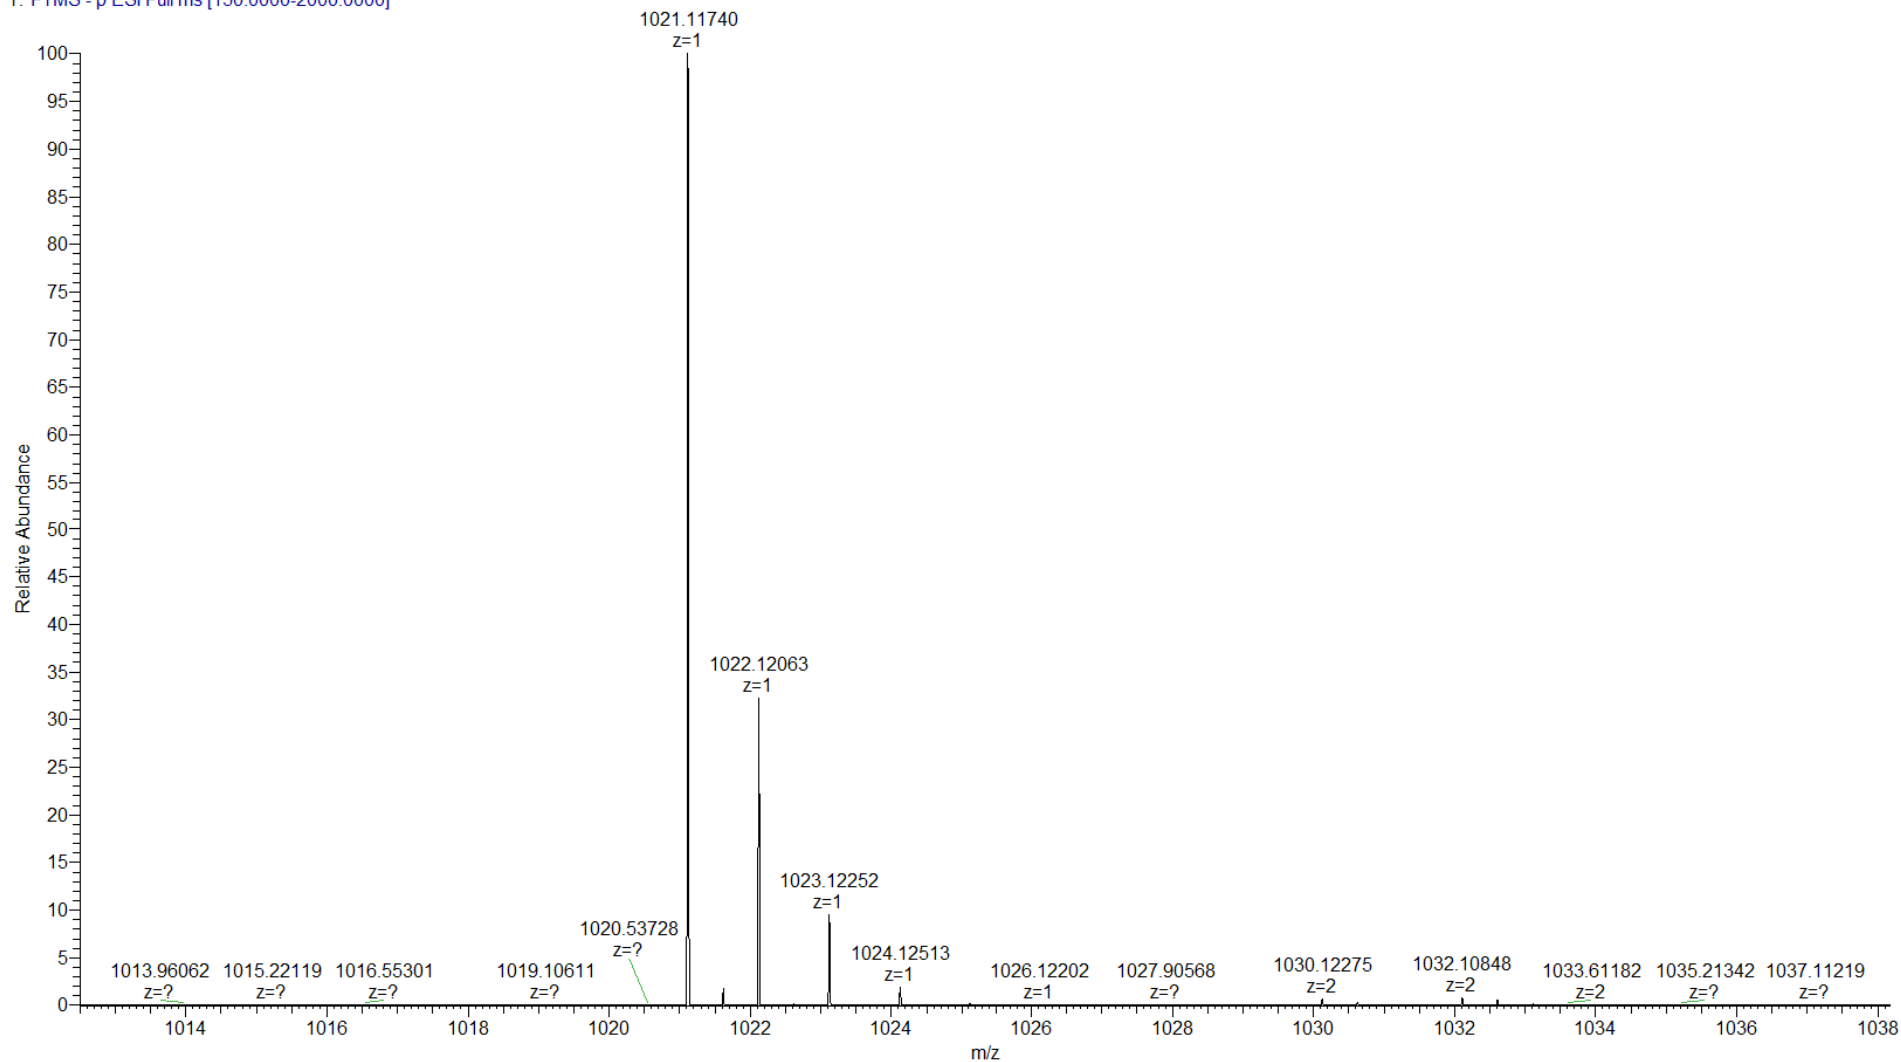

<sup>1</sup>H NMR (500 MHz, D<sub>2</sub>O, 25°C)

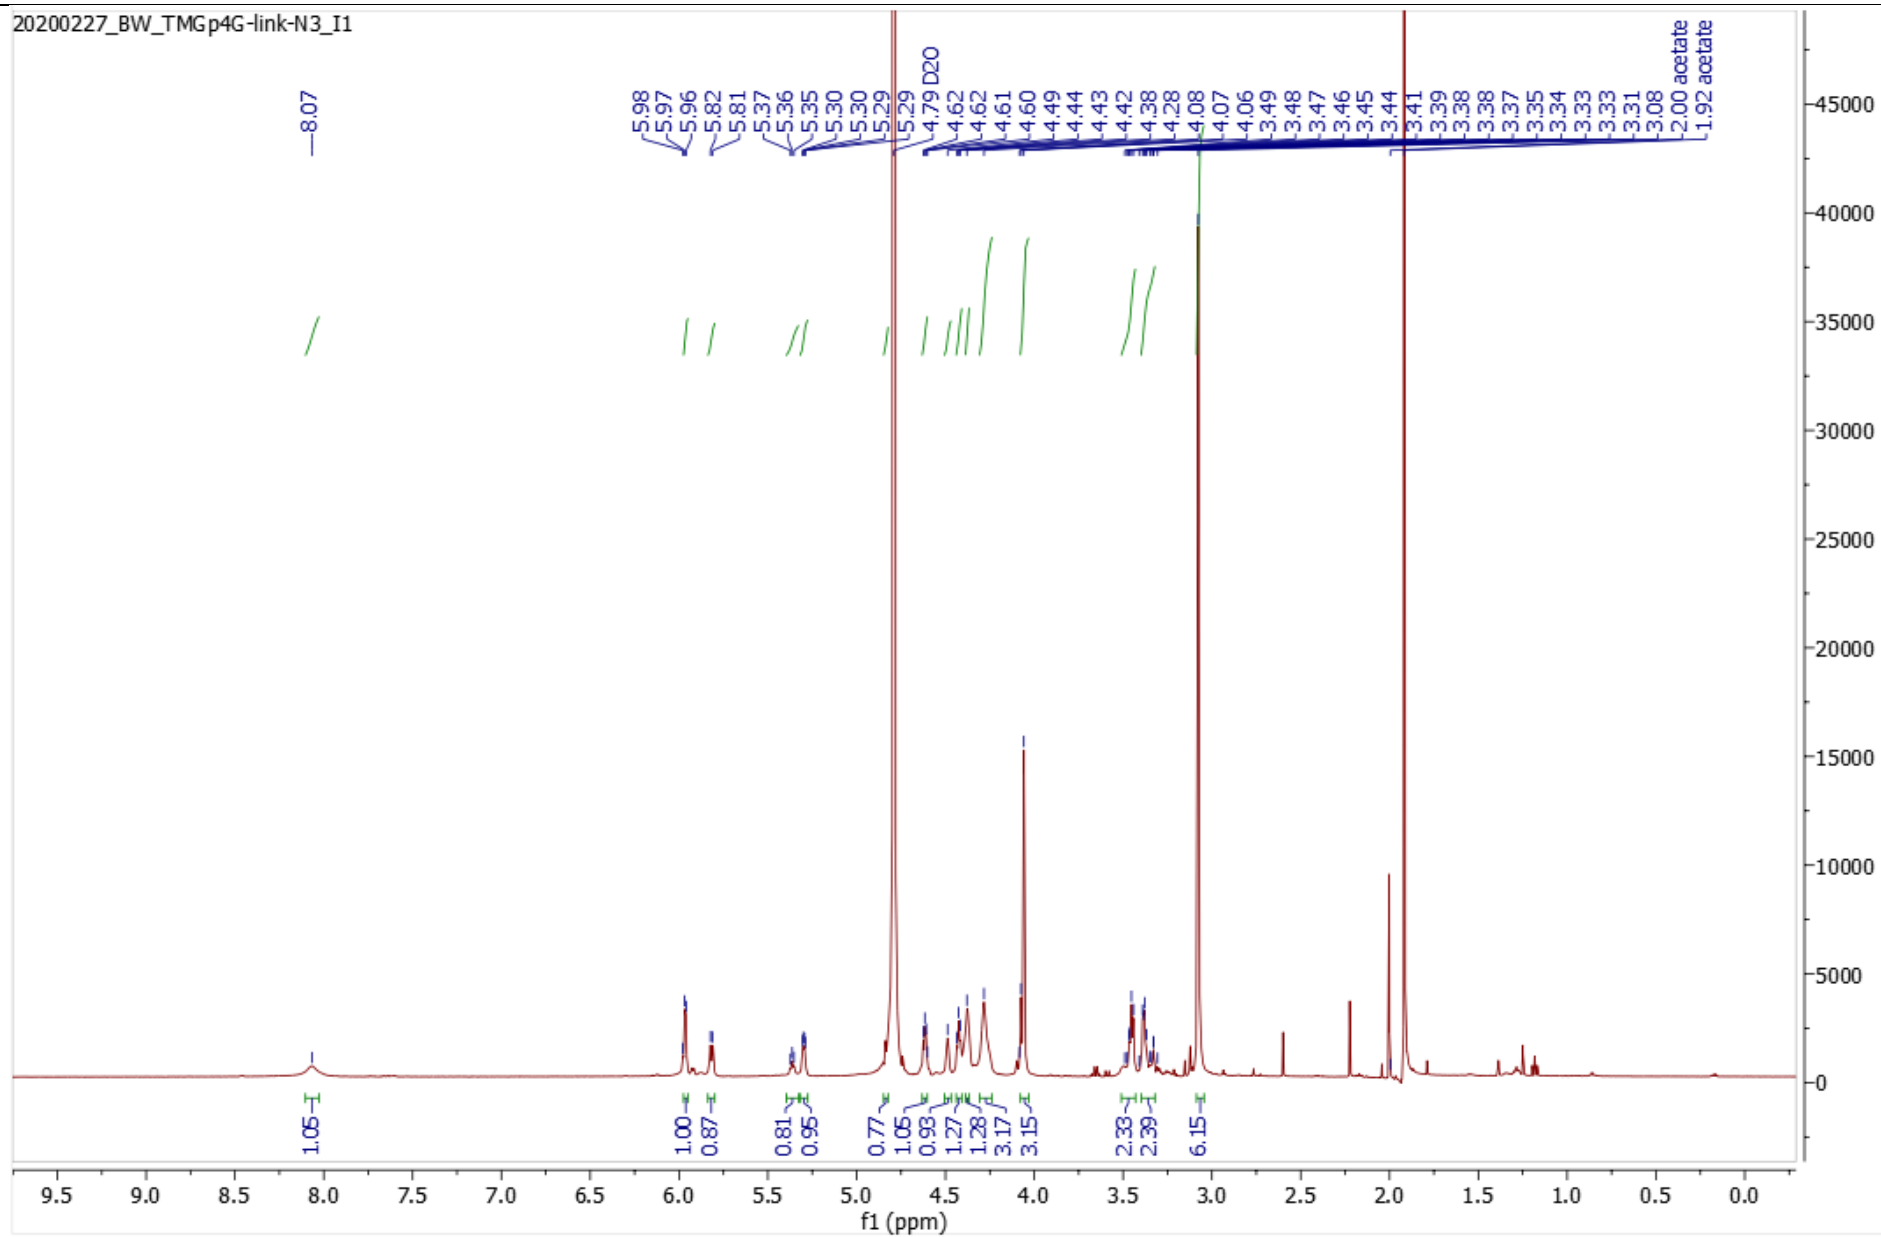

COSY NMR

COSY NMR TMGppppG-3p-link-N3 (I1)

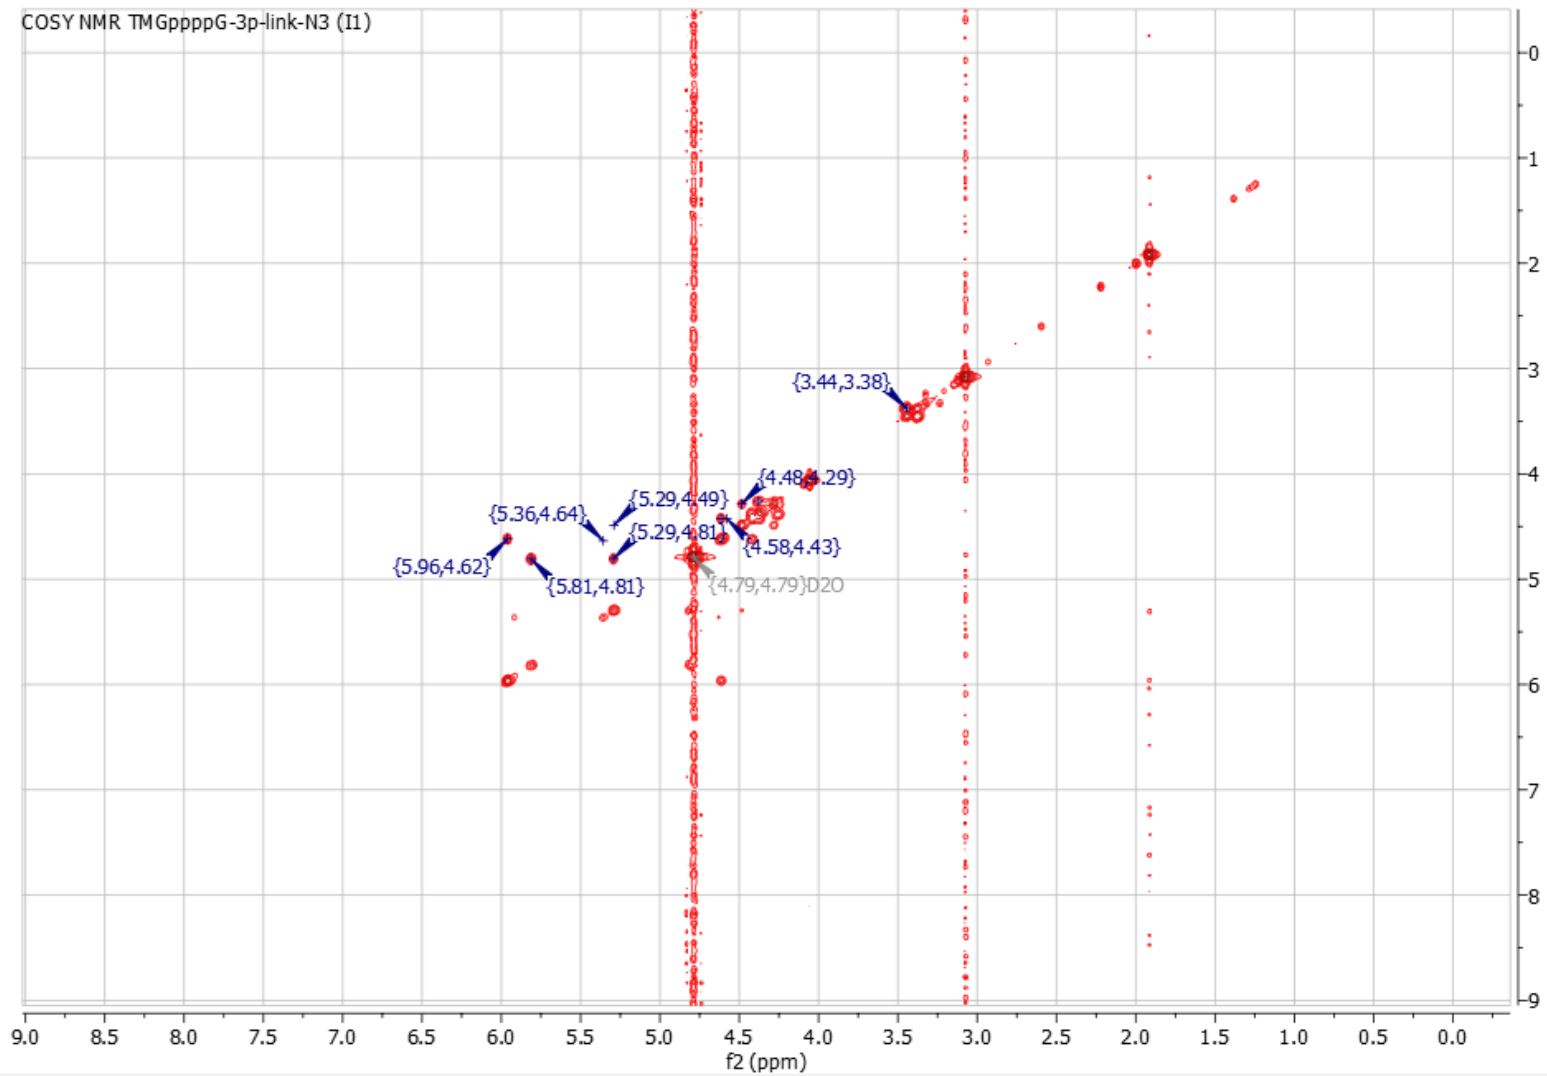

<sup>31</sup>P NMR (203 MHz, D<sub>2</sub>O, H<sub>3</sub>PO<sub>4</sub>, 25°C)

20200227\_BW\_TMgp4G-link-N3\_I1

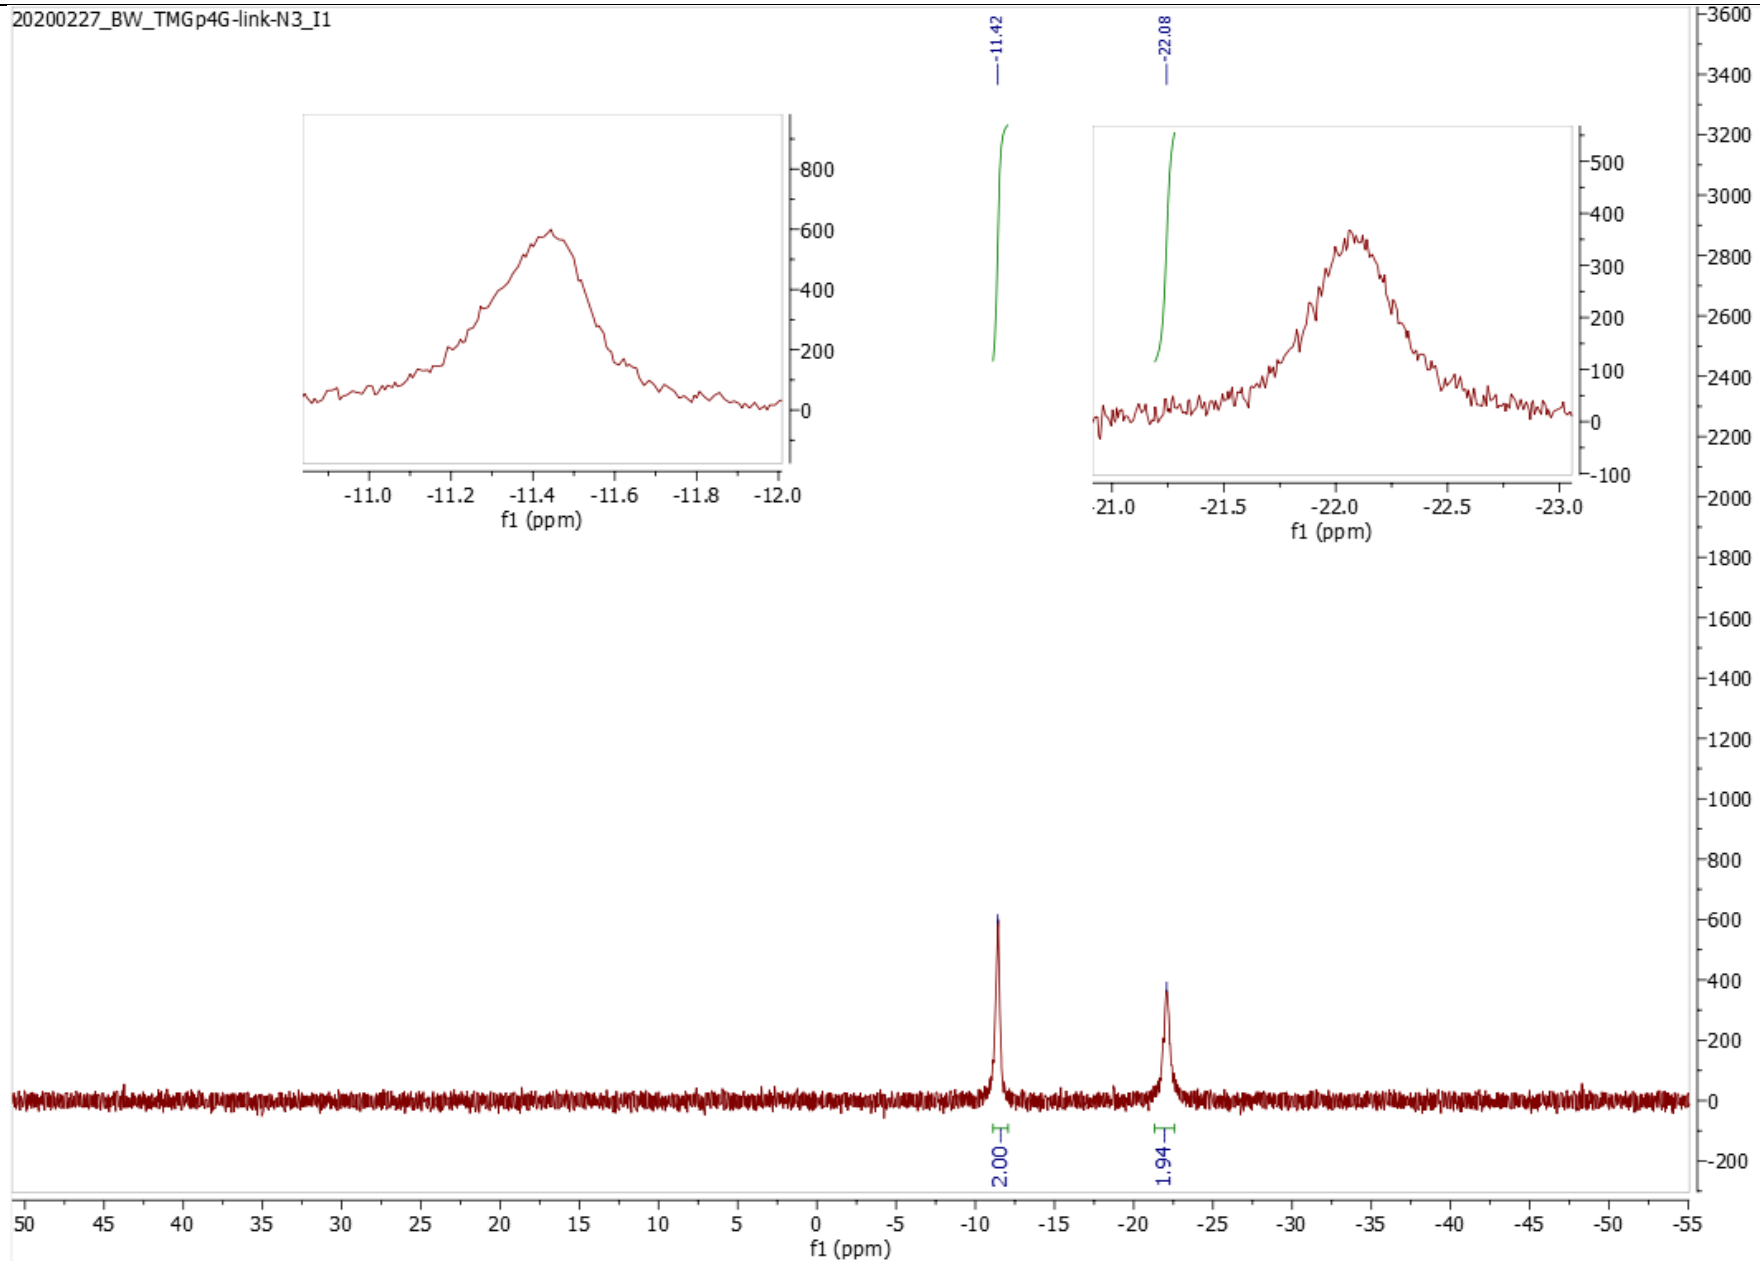

Compound 6: TMGppppA-2'+3'-O-C(O)-NH-CH<sub>2</sub>CH<sub>2</sub>-N<sub>3</sub> (NH<sub>4</sub><sup>+</sup> salt)

Chemical structure

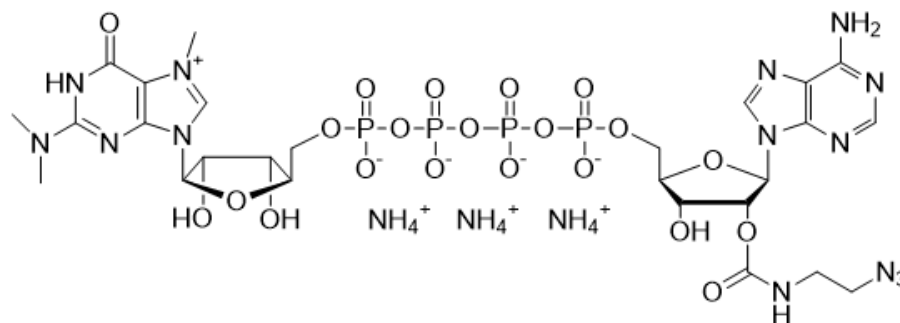

RP-HPLC (conditions c)

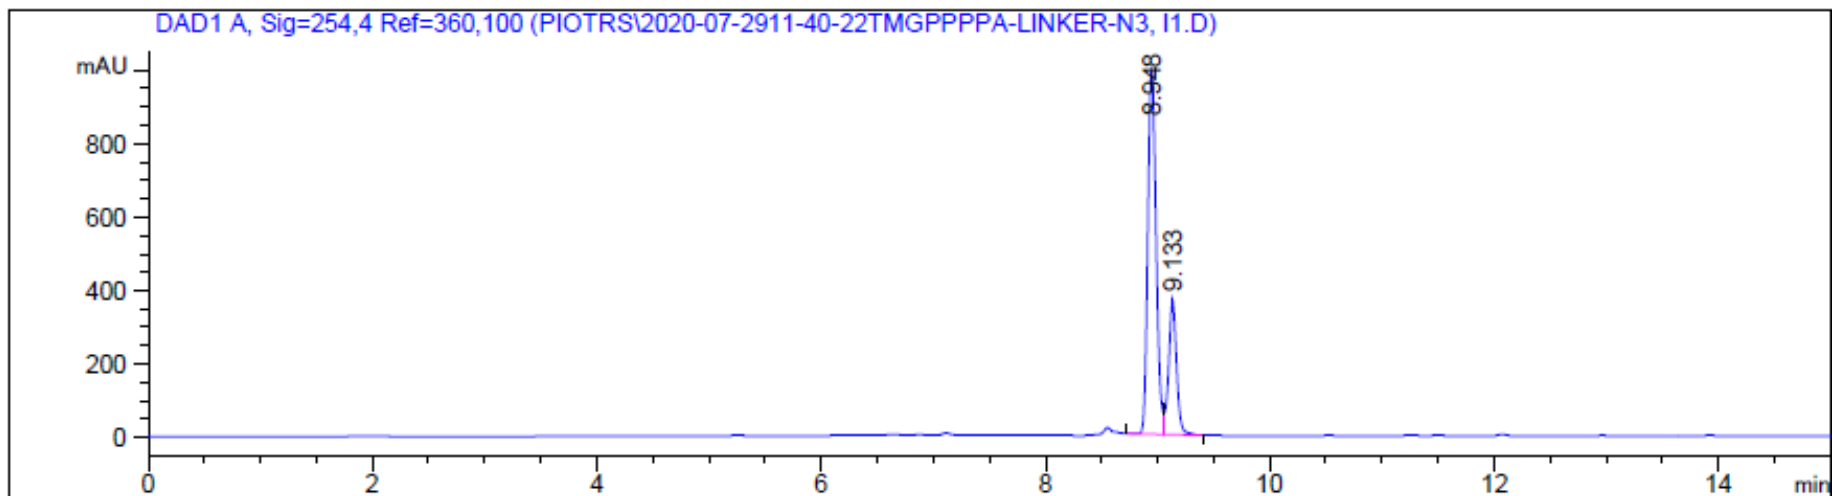



220407\_PSu\_02#203-267 RT: 1.77-2.33 AV: 65 NL: 3.76E6  
T: FTMS - p ESI Full ms [160.0000-2000.0000]

MS (-) ESI (Calc. [M-H]<sup>-</sup> C<sub>26</sub>H<sub>37</sub>N<sub>14</sub>O<sub>21</sub>P<sub>4</sub><sup>-</sup> : 1005.1214, found: 1005.12324)

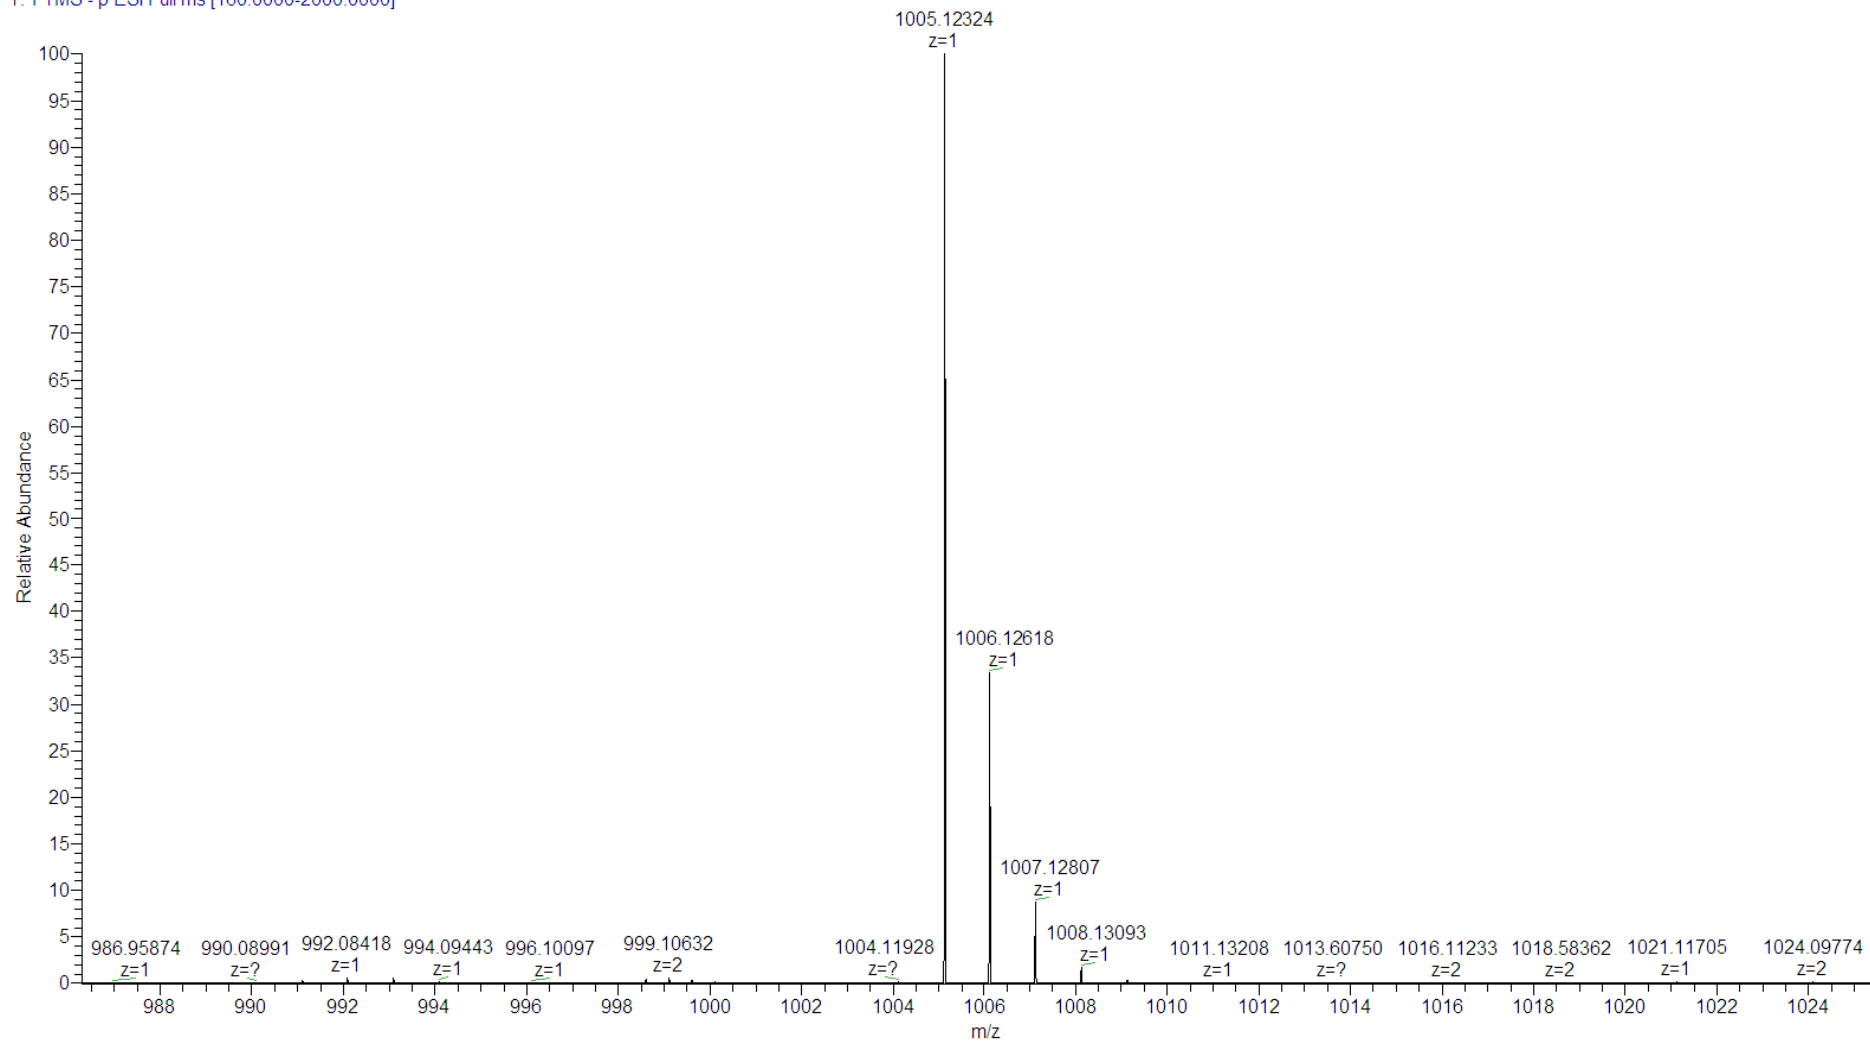

<sup>1</sup>H NMR (500 MHz, D<sub>2</sub>O, 25°C)

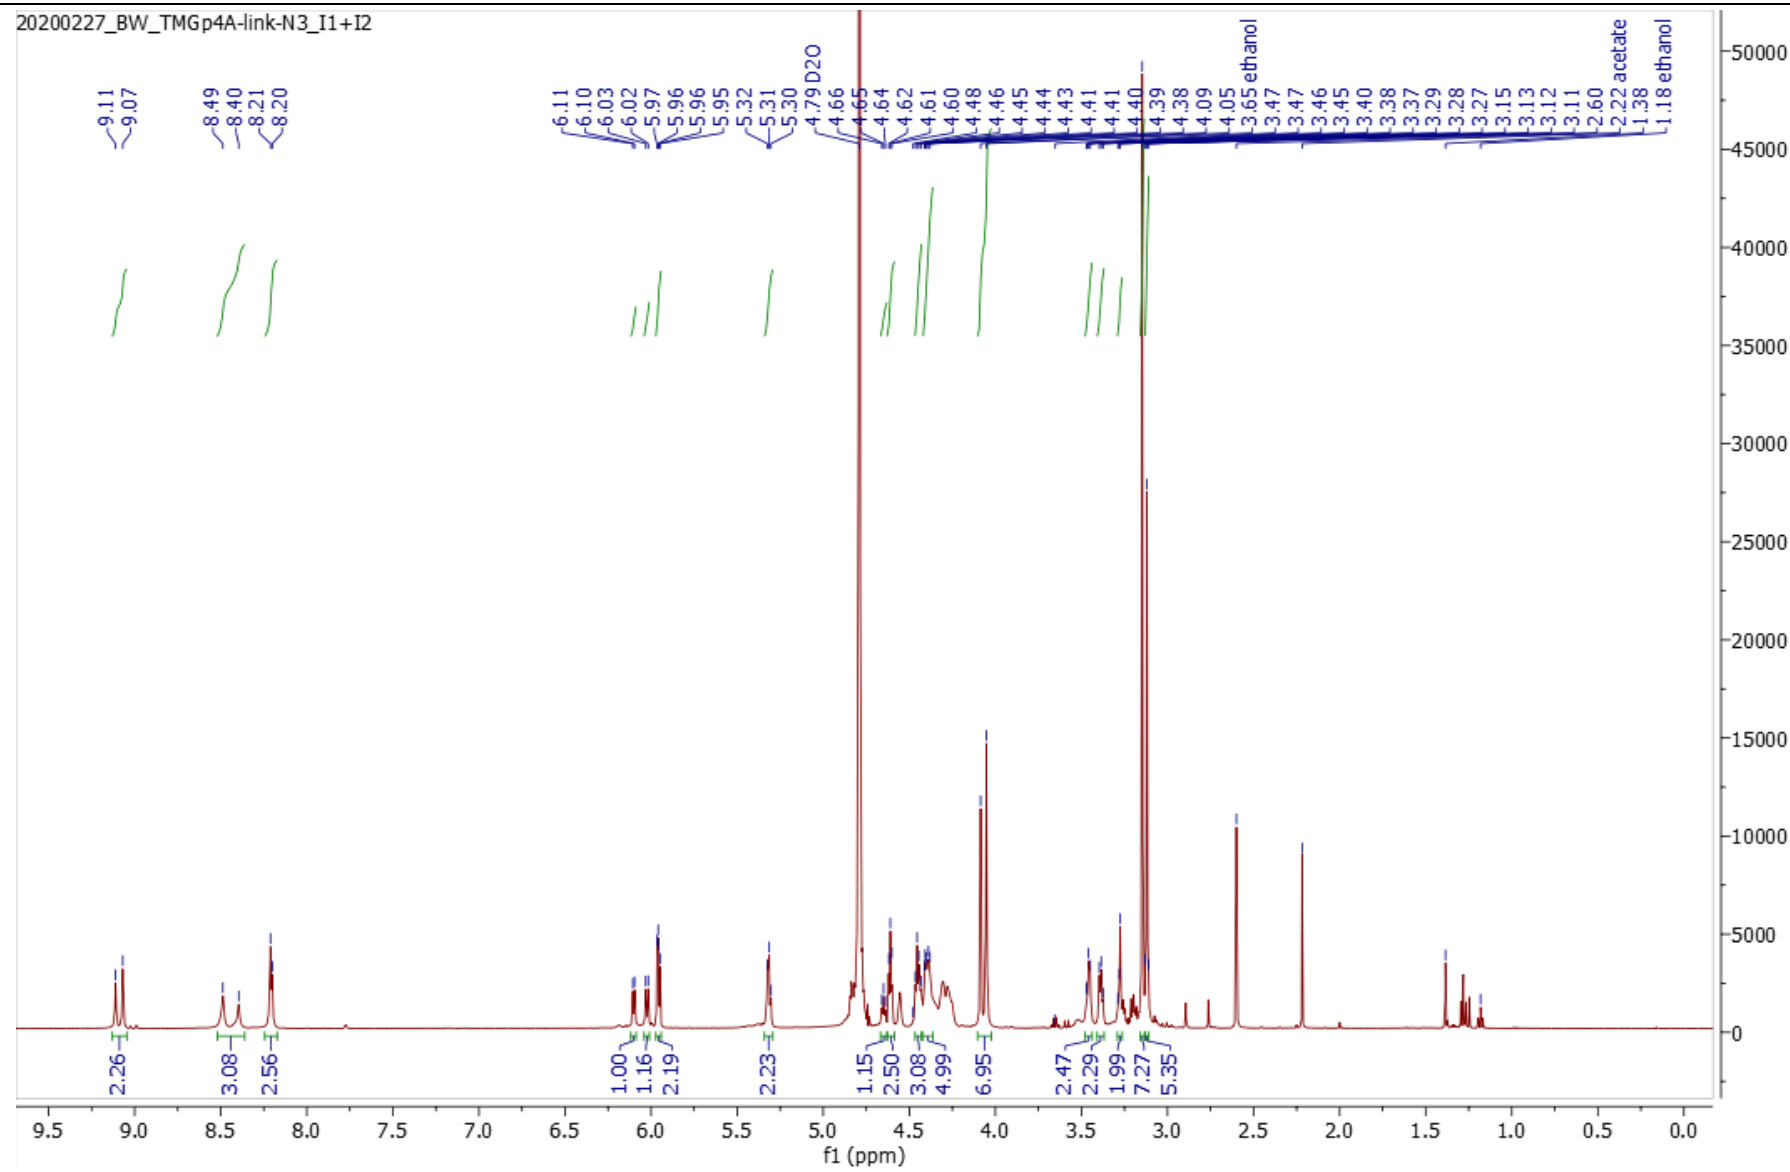

COSY NMR

COSY NMR TMGppppA-2p+3p-link-N3\_mix

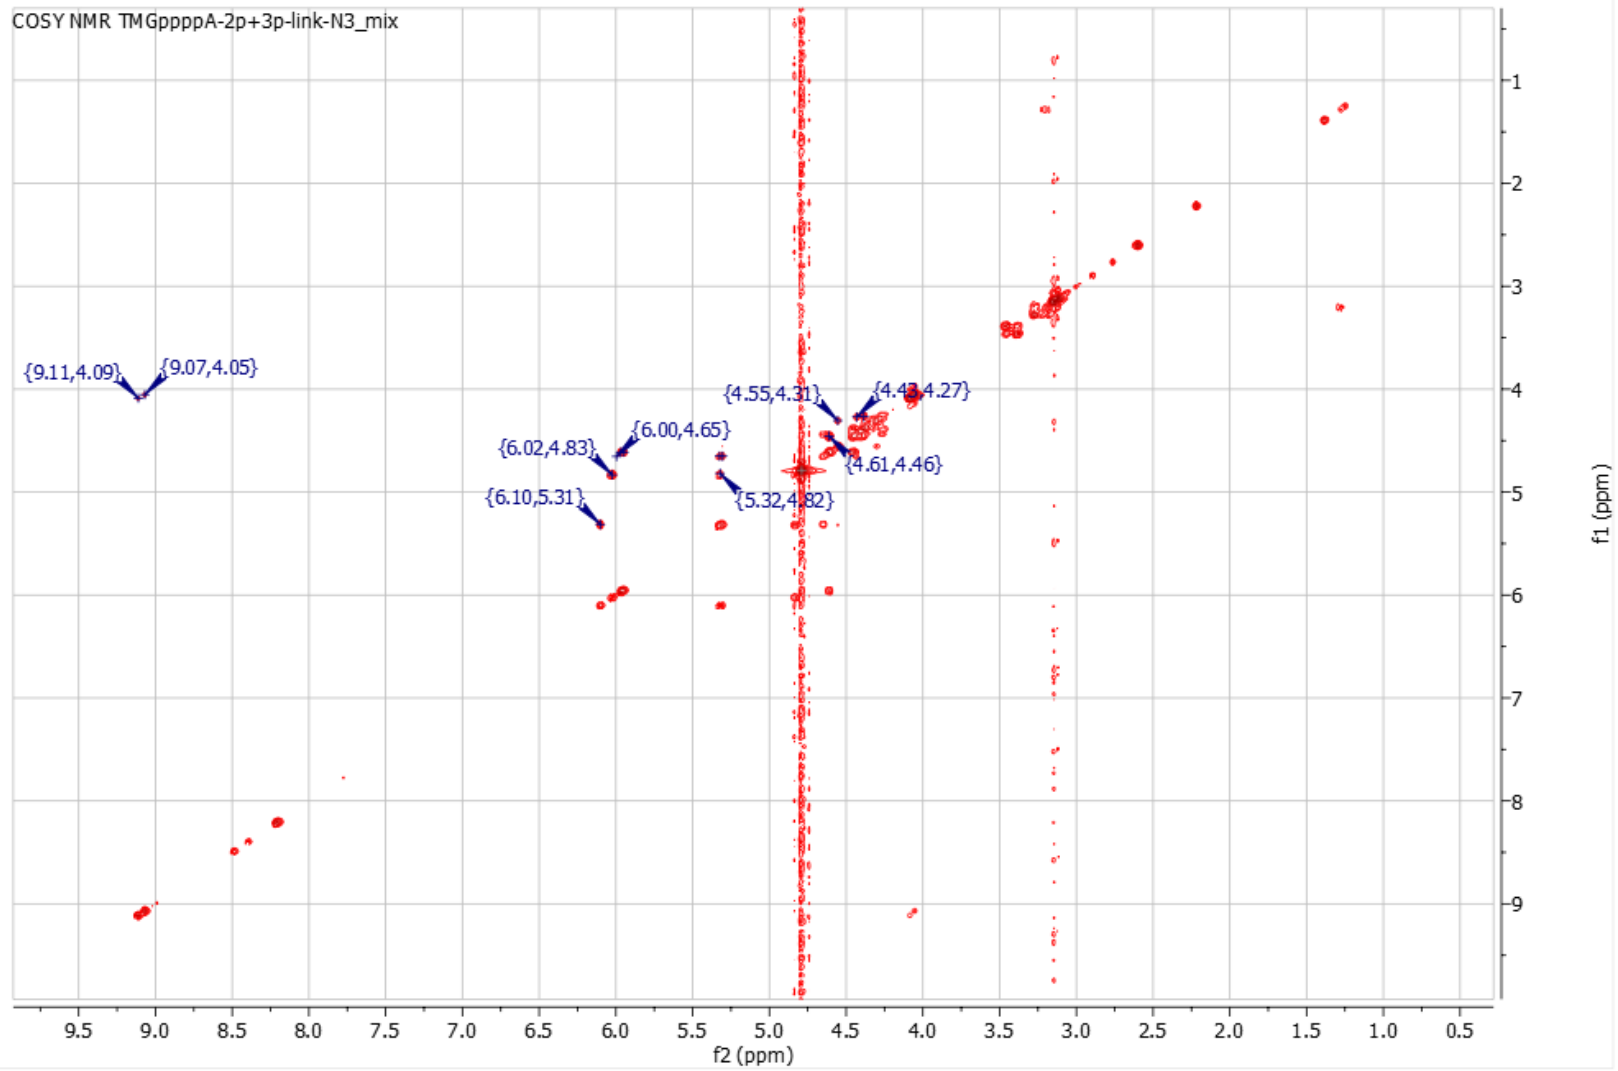

$^{31}\text{P}$  NMR (203 MHz,  $\text{D}_2\text{O}$ ,  $\text{H}_3\text{PO}_4$ , 25°C)

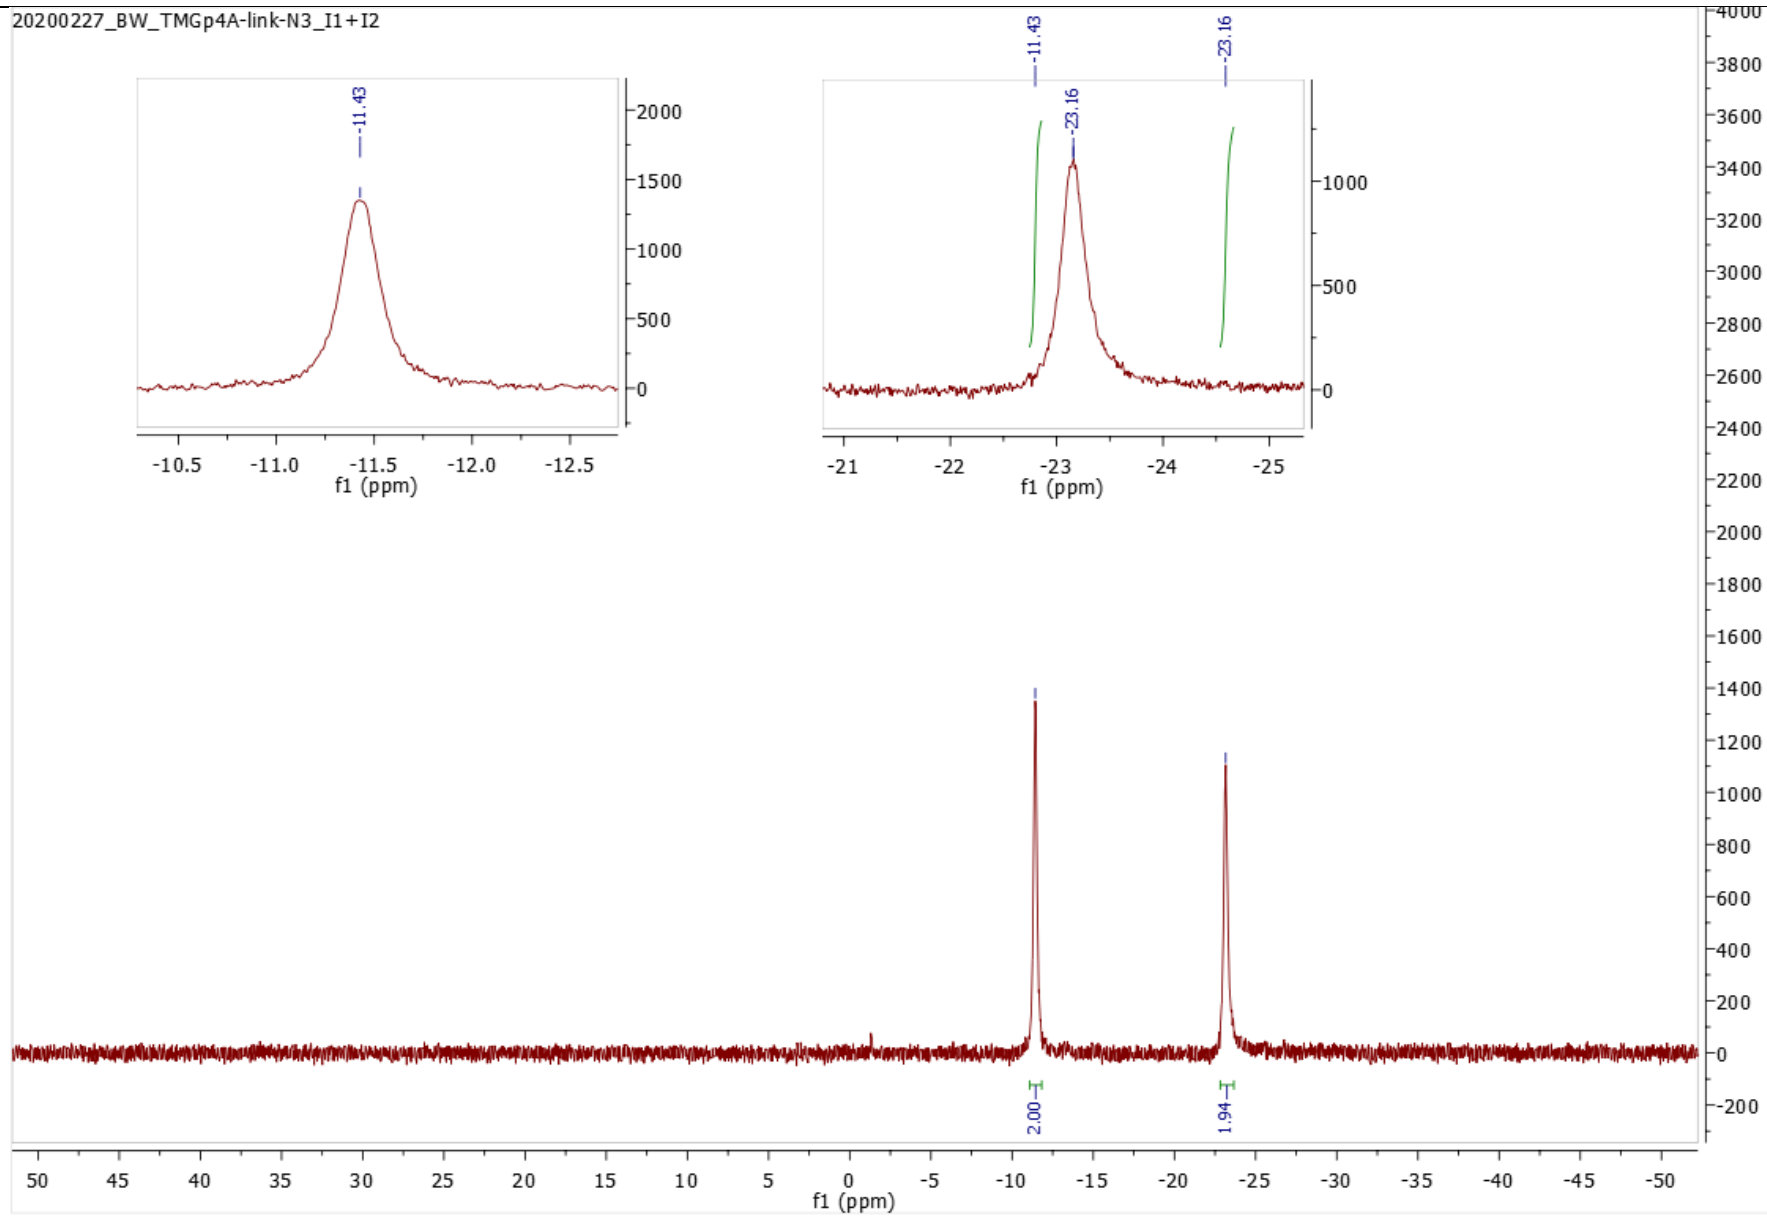

Compound 7-2': TMGppp-5'-SG-2'-O-C(O)-NH-C<sub>3</sub>H<sub>3</sub> (NH<sub>4</sub><sup>+</sup> salt)

Chemical structure

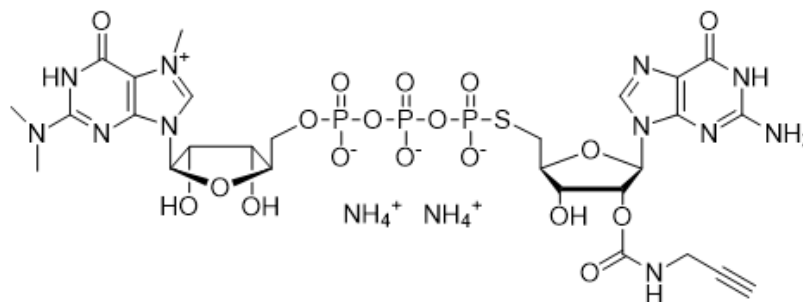

RP-HPLC (conditions c)

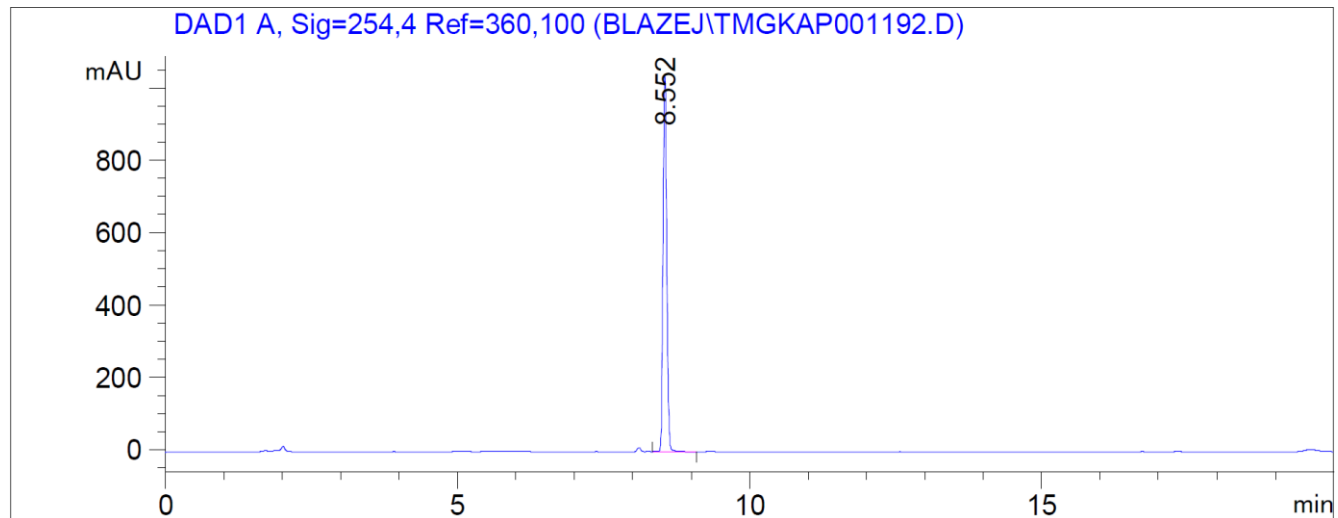

201119\_PSu\_10 #147-231 RT: 1.42-2.23 AV: 85 NL: 5.25E5  
T: FTMS - p ESI Full ms [150.0000-2000.0000]

MS (-) ESI (Calc. [M-H]<sup>-</sup> C<sub>27</sub>H<sub>35</sub>N<sub>11</sub>O<sub>18</sub>P<sub>3</sub>S<sup>-</sup> : 926.1101; found 926.11222)

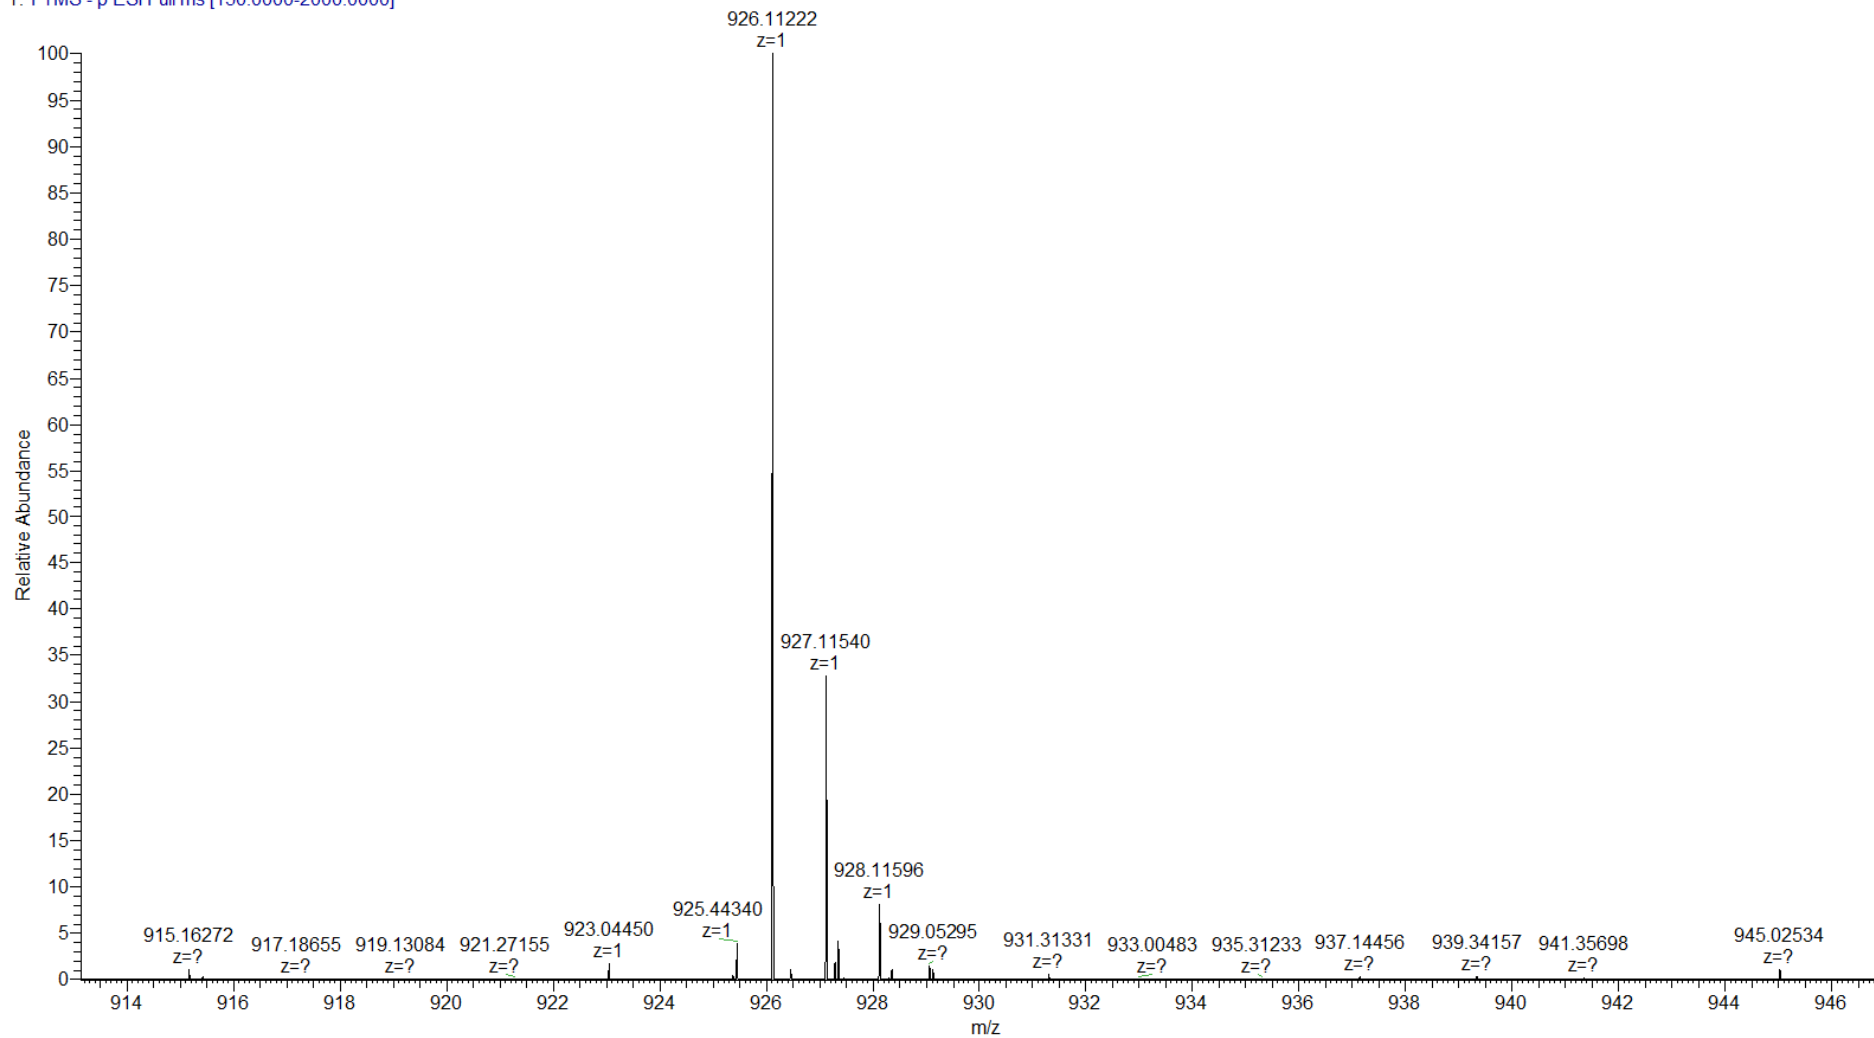

<sup>1</sup>H NMR (500 MHz, D<sub>2</sub>O, 25°C)

1H NMR TMGpppSG-2'-link-pgyl\_Izo2

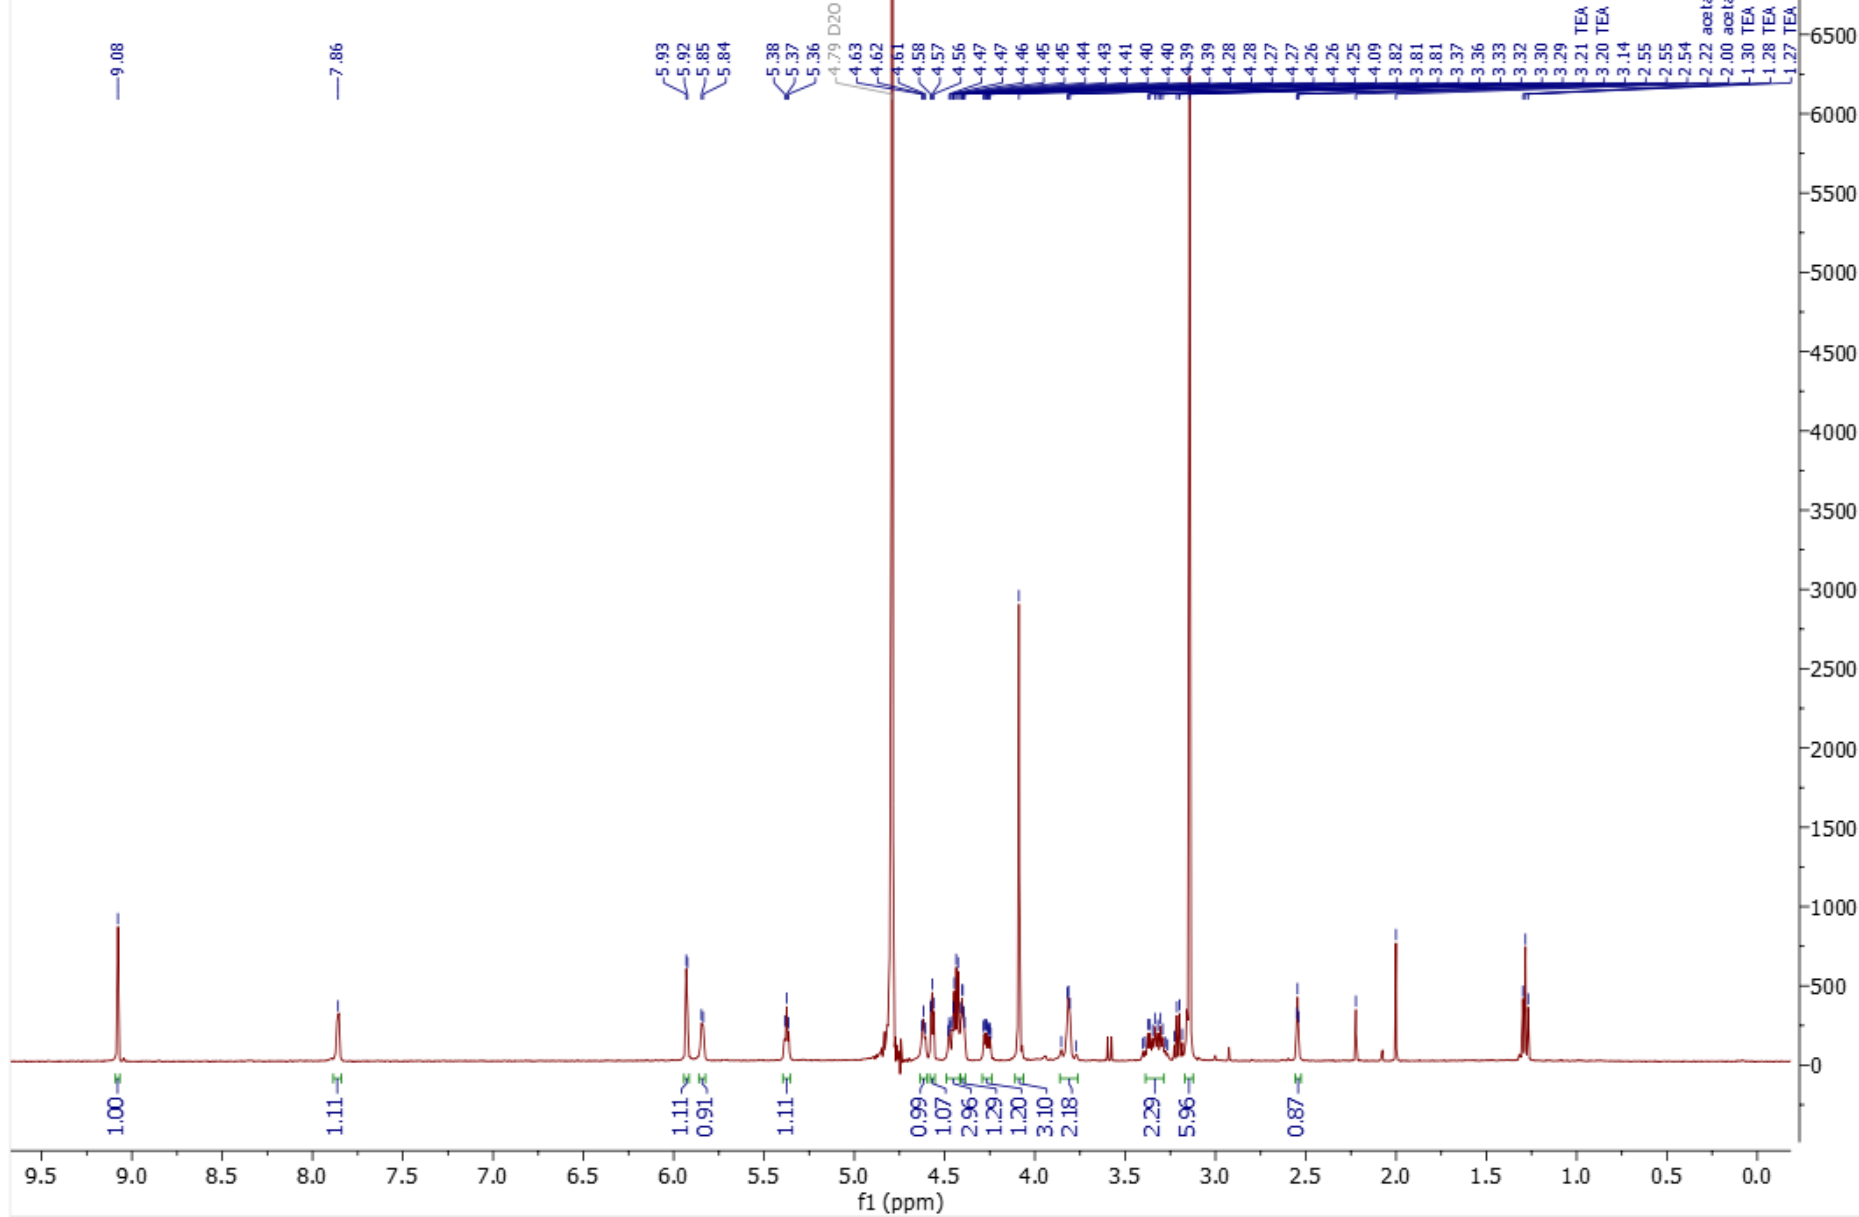

COSY NMR

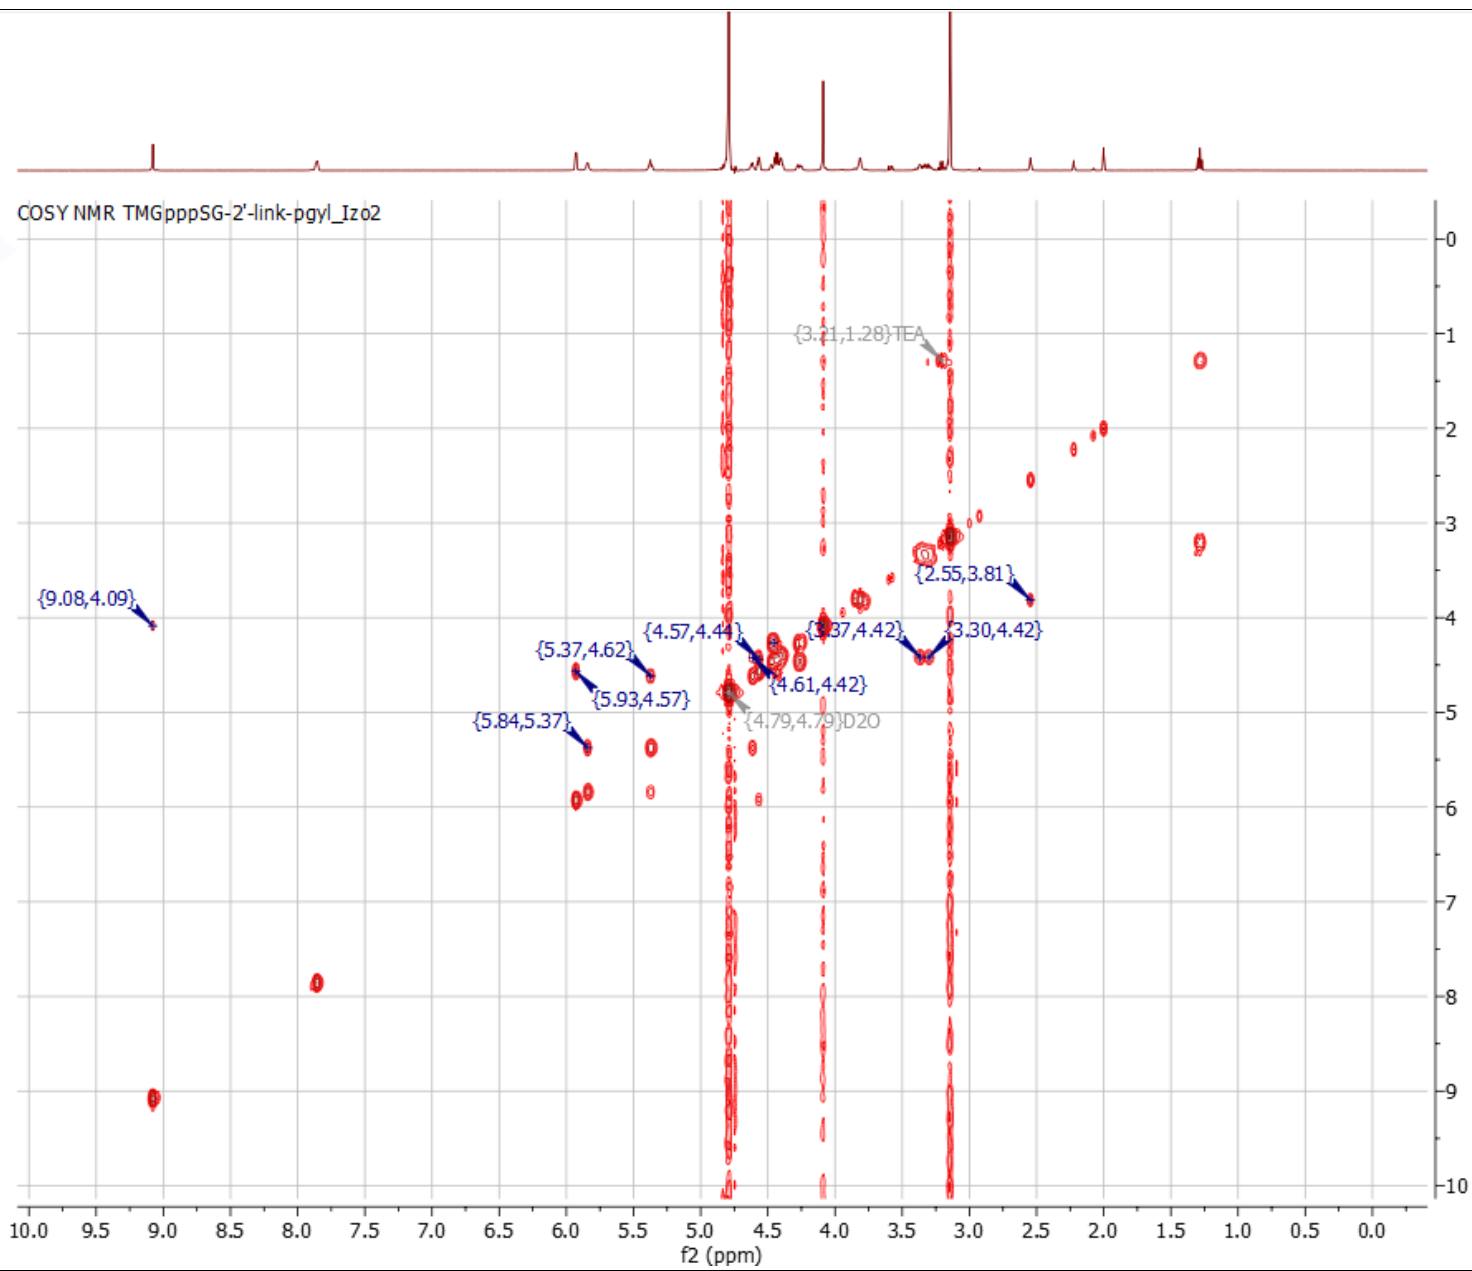



HSQC NMR

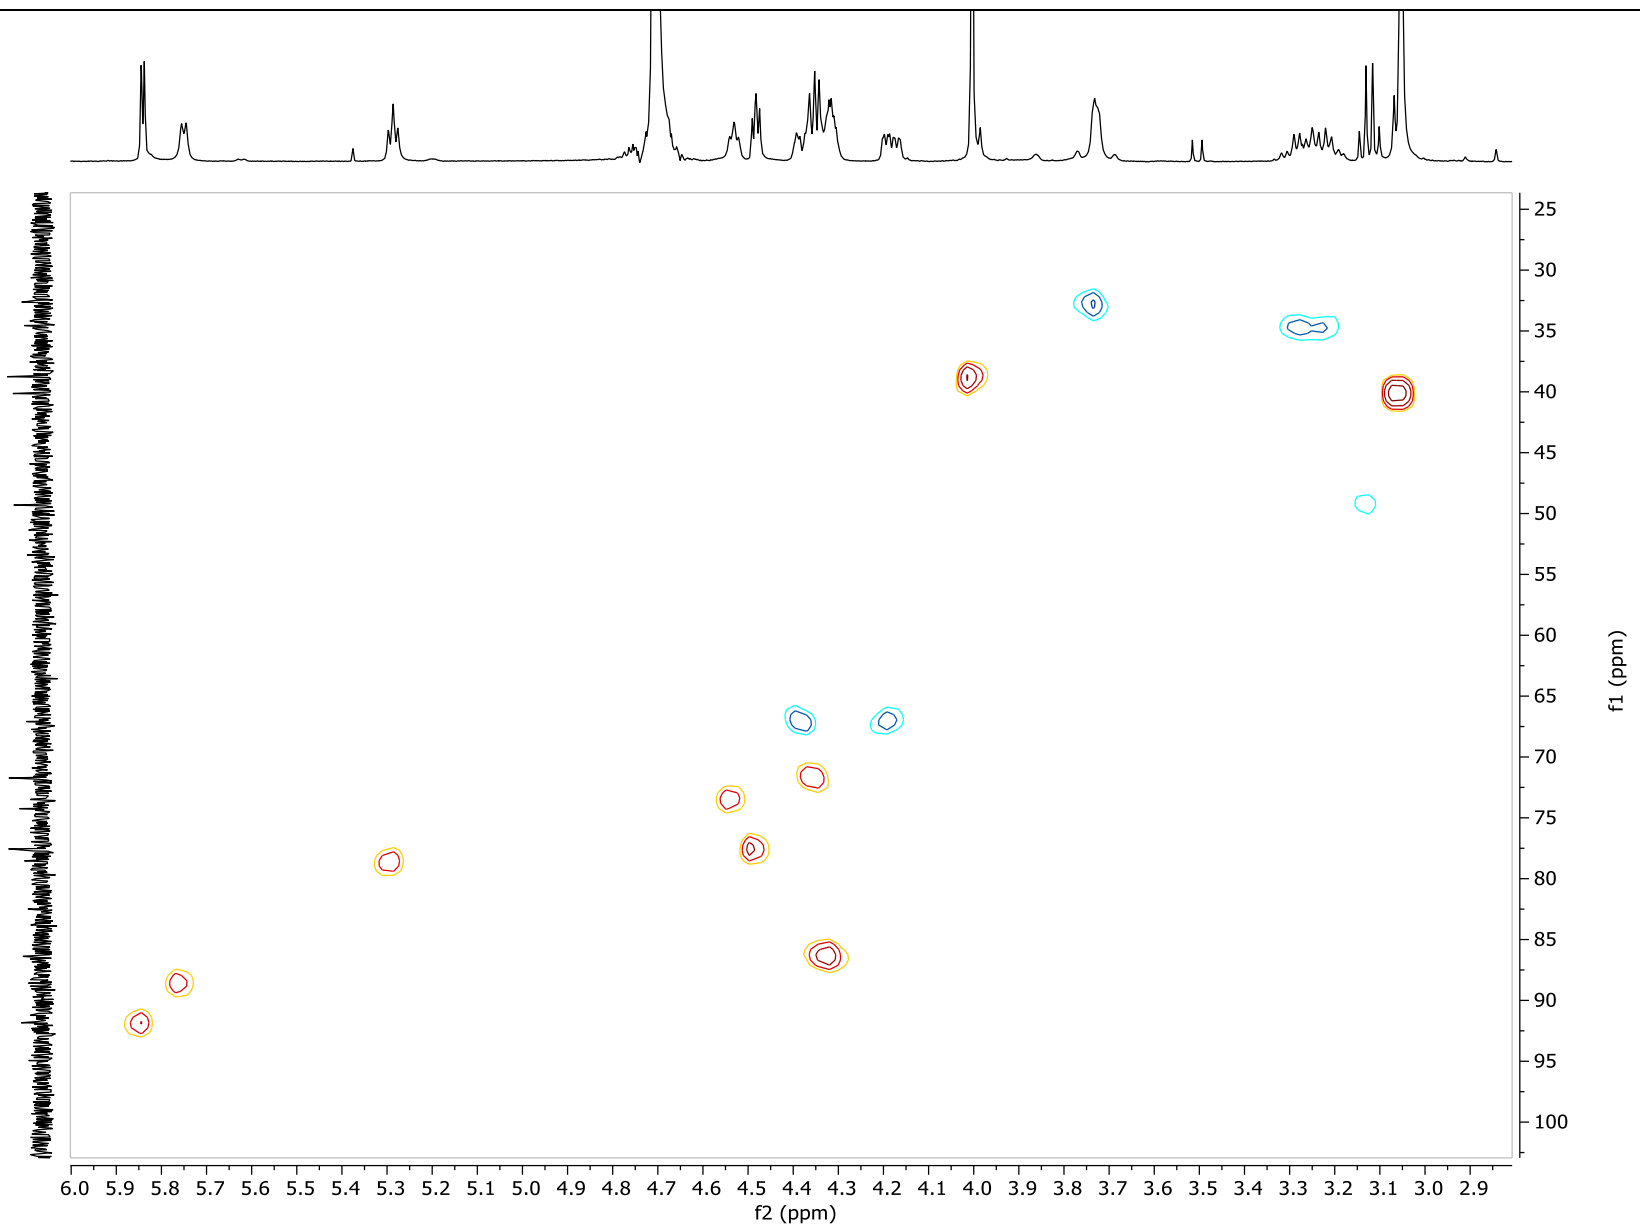

<sup>31</sup>P NMR (203 MHz, D<sub>2</sub>O, H<sub>3</sub>PO<sub>4</sub>, 25°C)

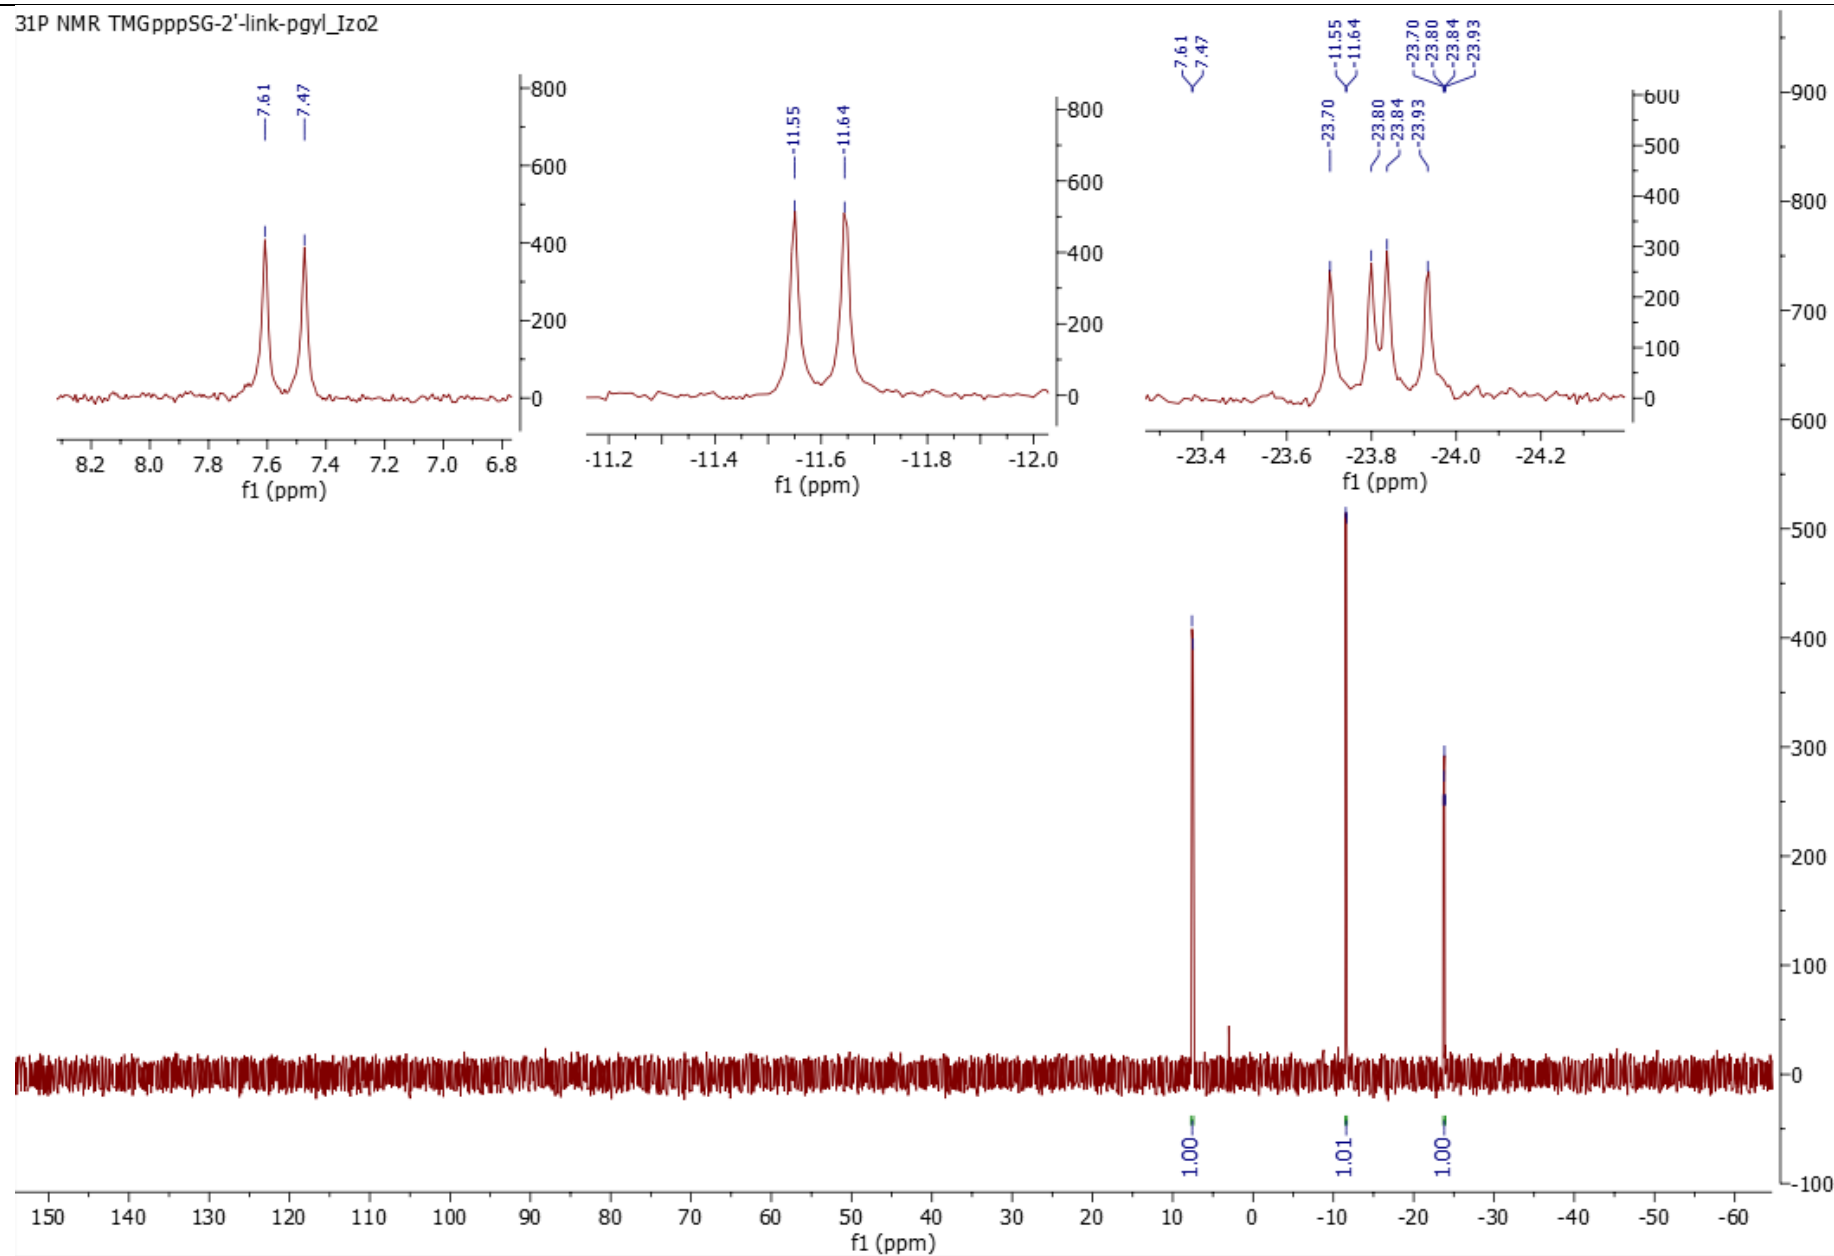

Compound 7-3': TMGppp-5'-SG-3'-O-C(O)-NH-C<sub>3</sub>H<sub>3</sub> (NH<sub>4</sub><sup>+</sup> salt)

Chemical structure

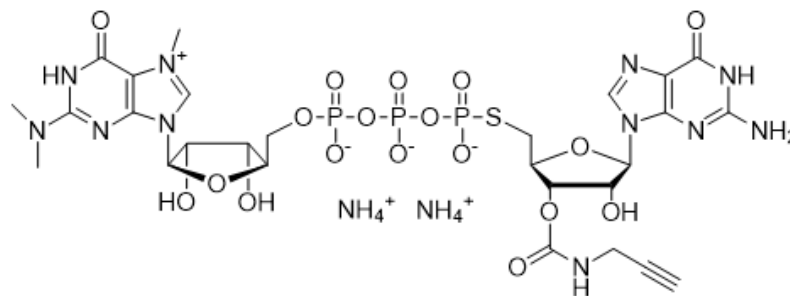

RP-HPLC (conditions c)

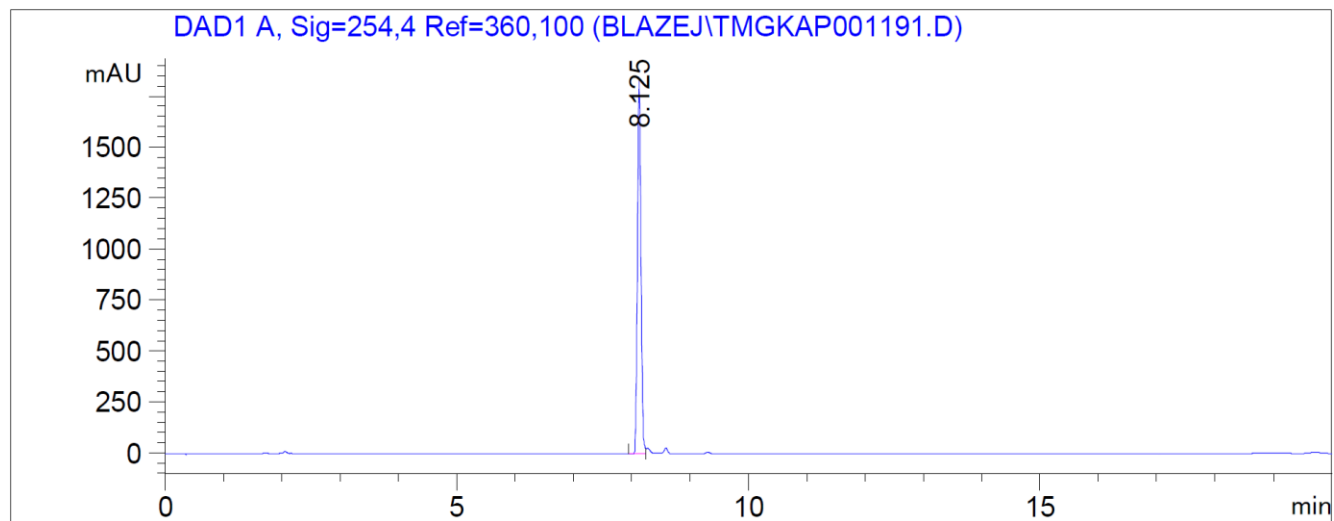

201119\_PSu\_09 #131-201 RT: 1.28-1.97 AV: 71 NL: 2.37E5  
T: FTMS - p ESI Full ms [150.0000-2000.0000]

MS (-) ESI (Calc. [M-H]<sup>-</sup> C<sub>27</sub>H<sub>35</sub>N<sub>11</sub>O<sub>18</sub>P<sub>3</sub>S<sup>-</sup> : 926.1101; found 926.11211)

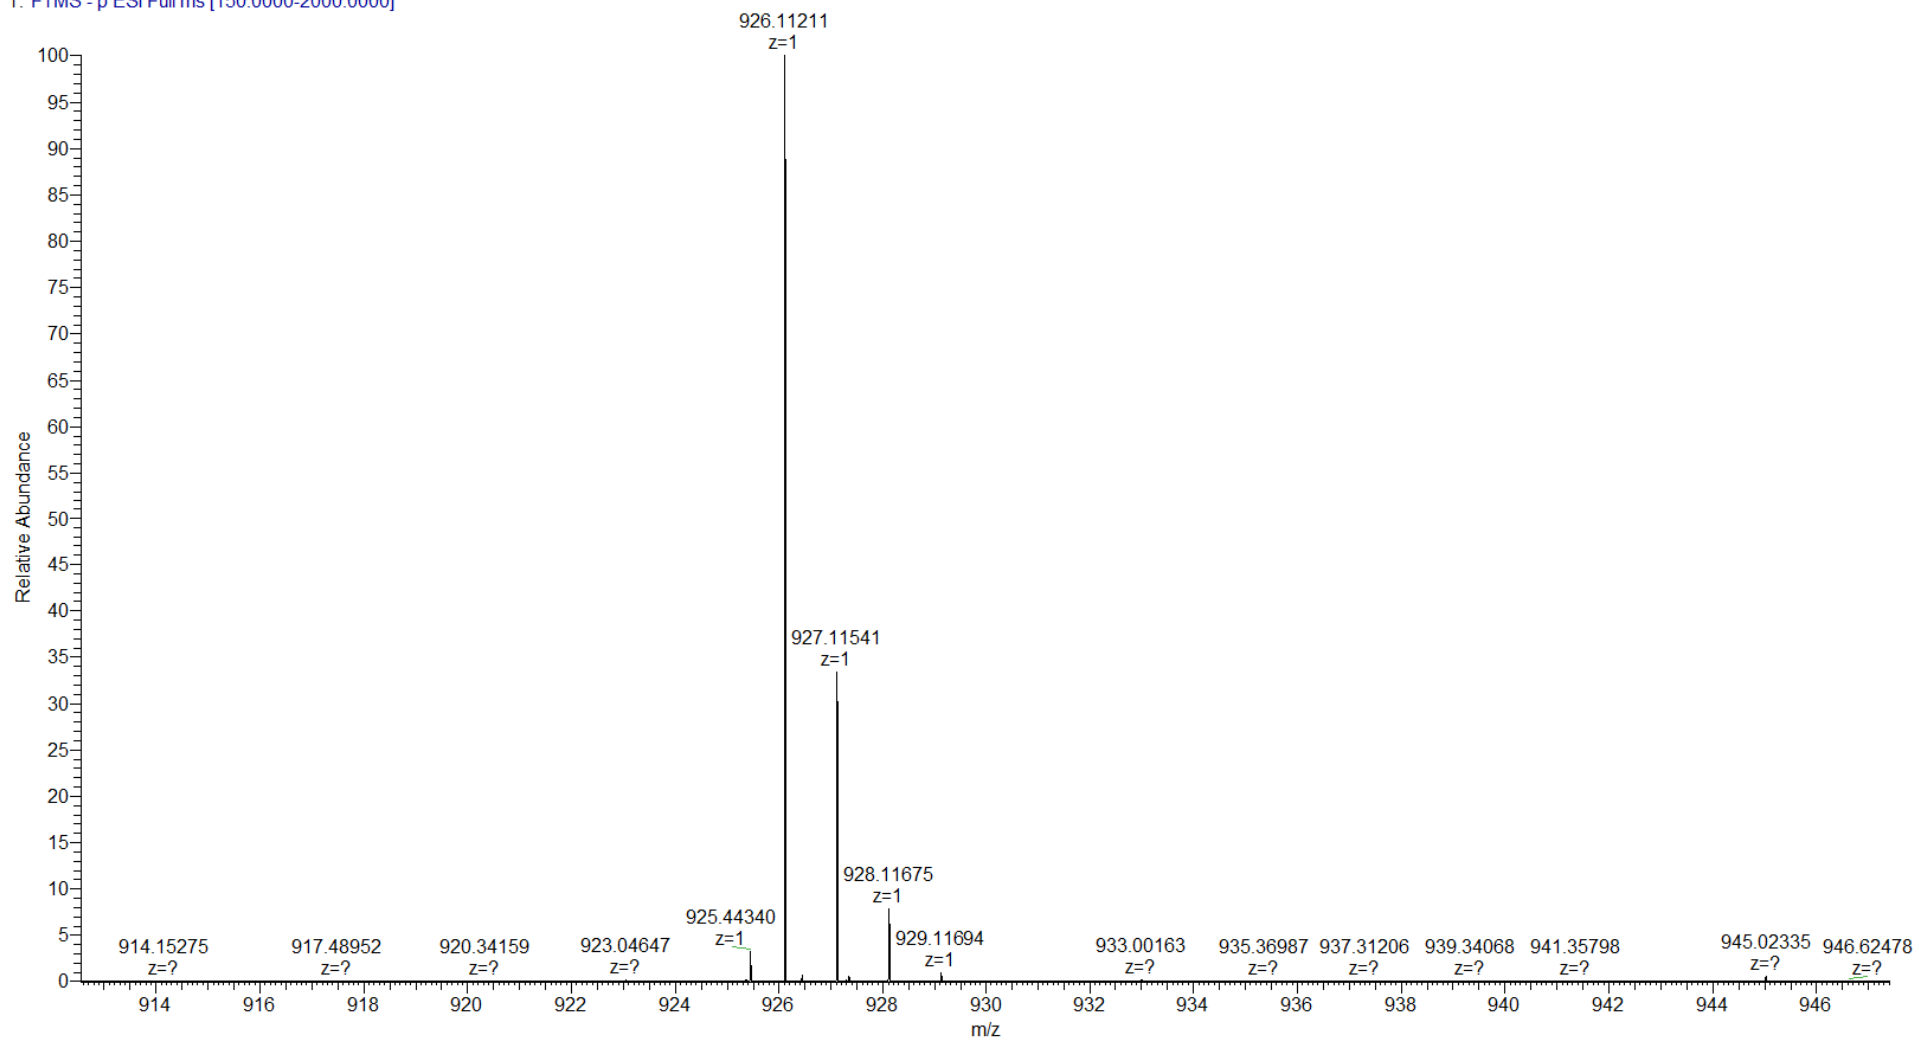

<sup>1</sup>H NMR (500 MHz, D<sub>2</sub>O, 25°C)

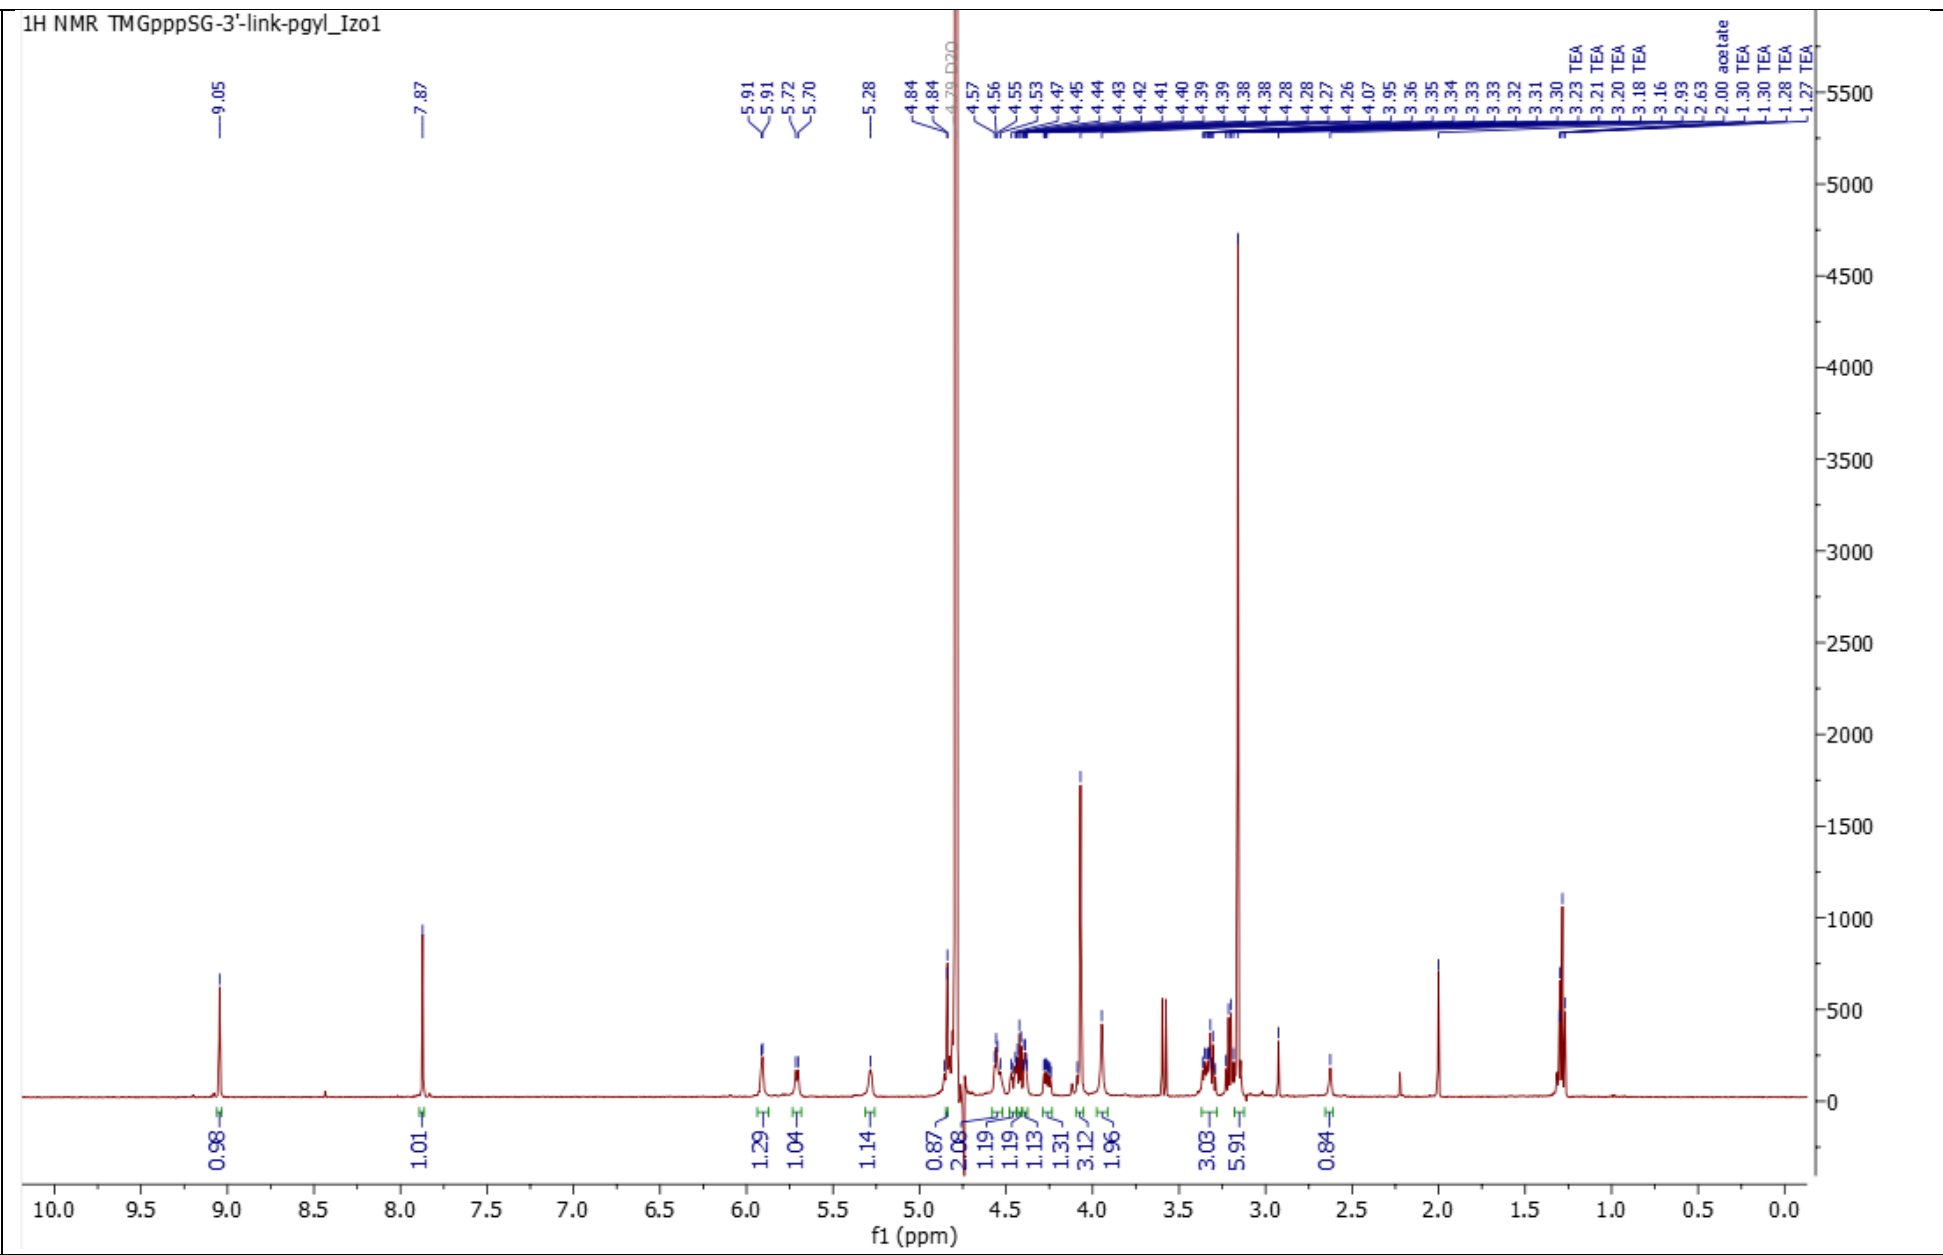

COSY NMR

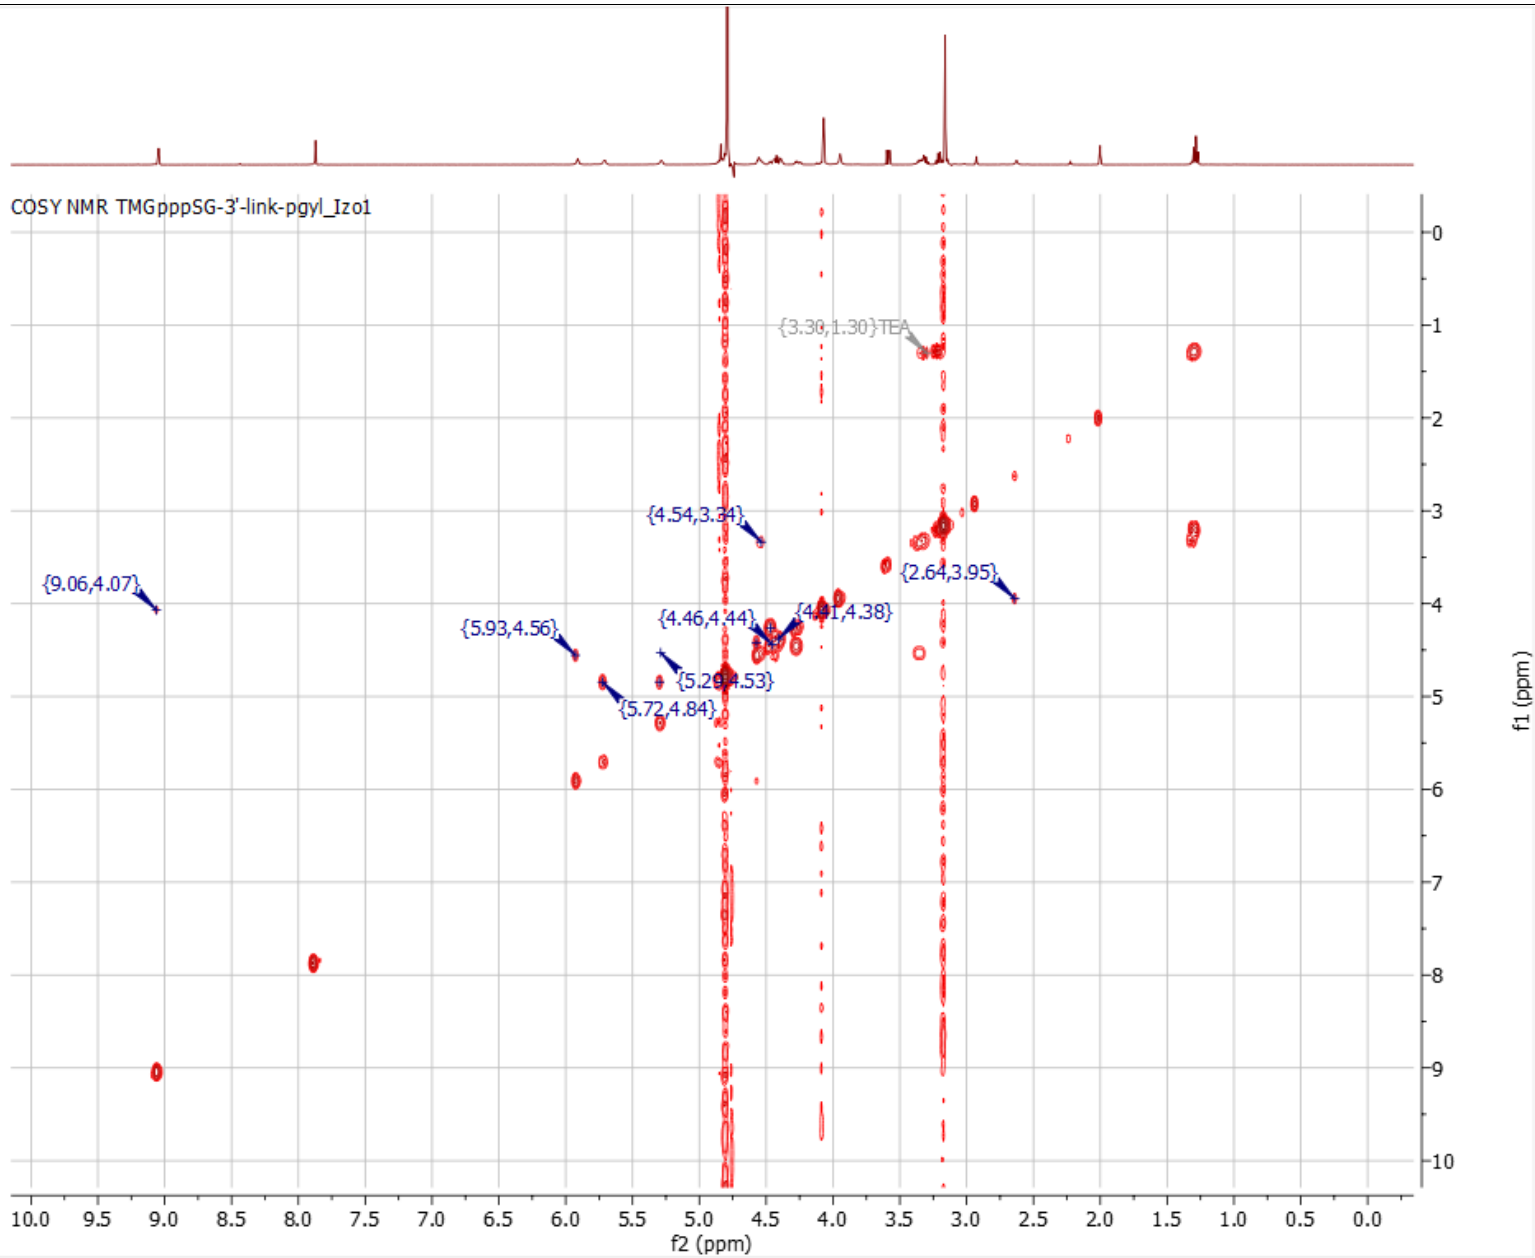

<sup>13</sup>C NMR (500 MHz, D<sub>2</sub>O, 25°C)

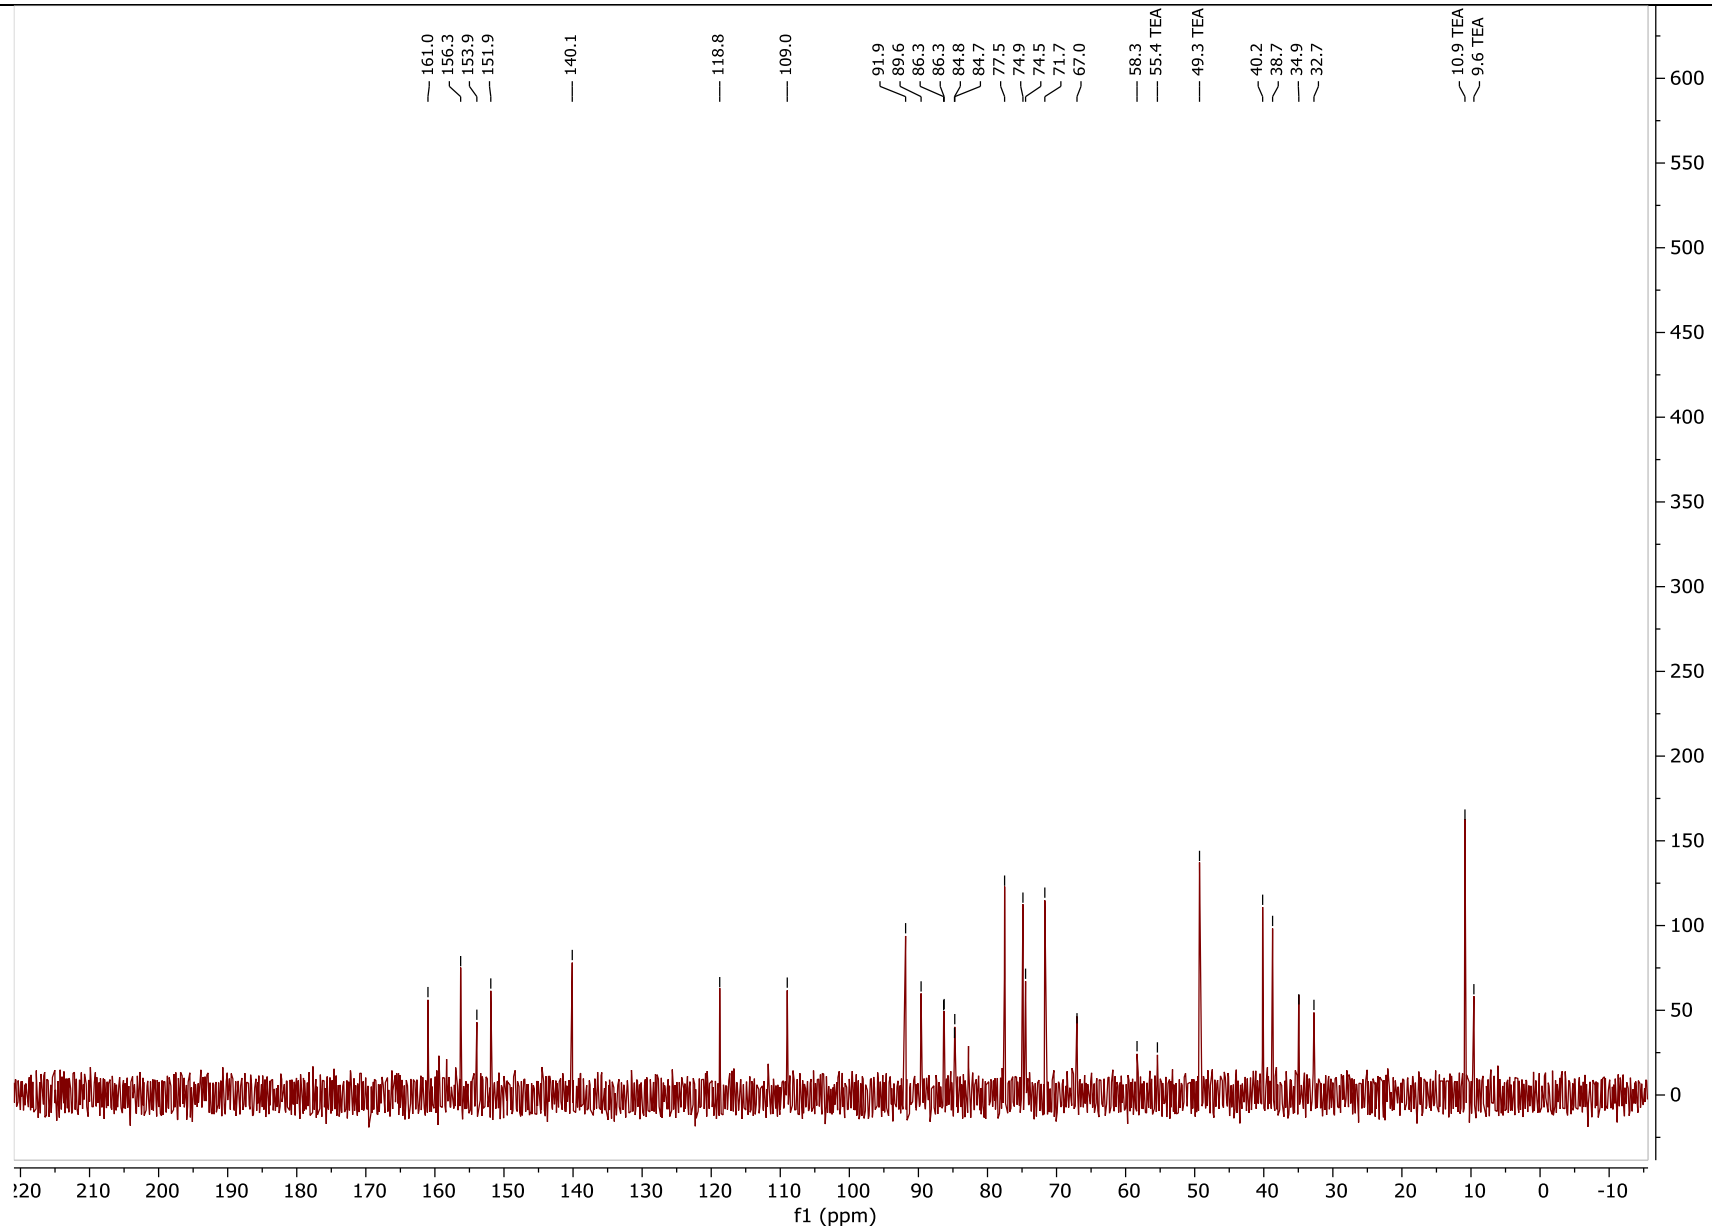

HSQC NMR

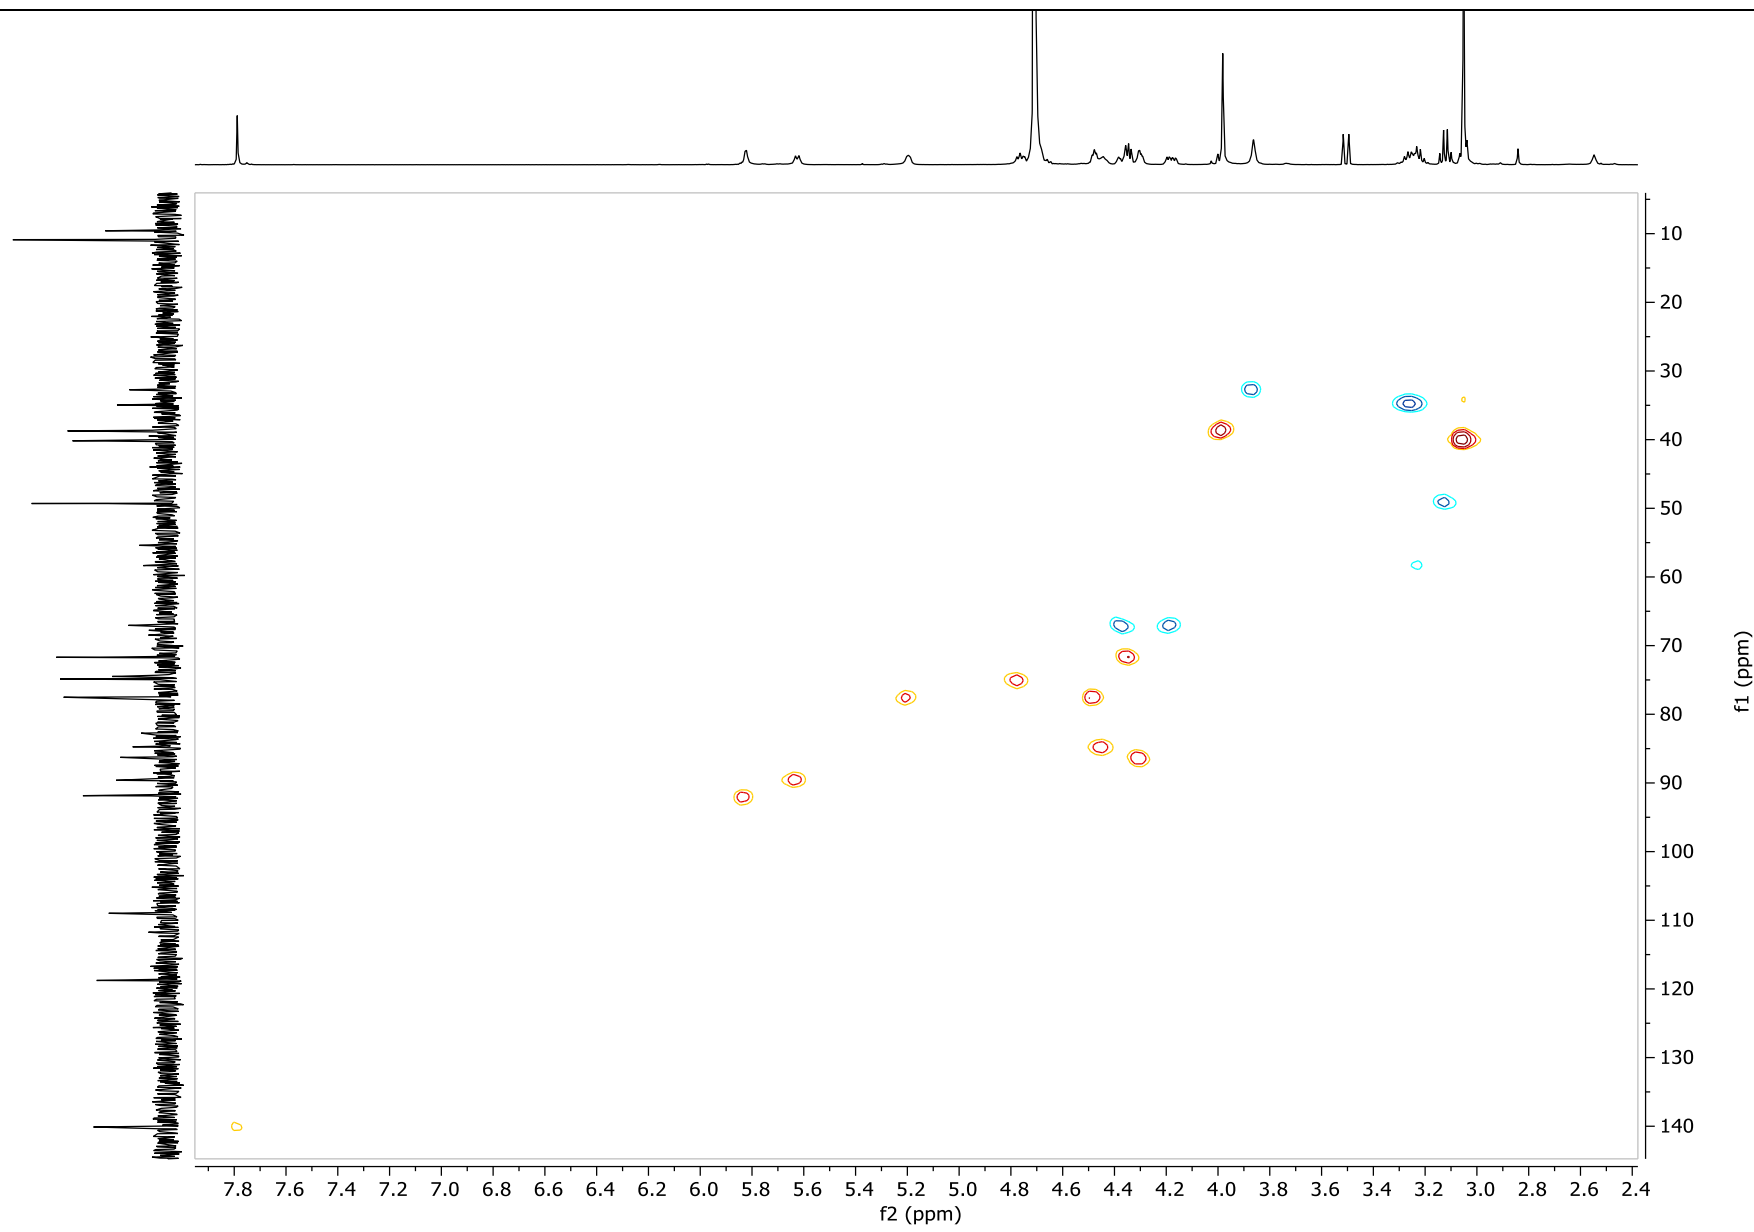



<sup>31</sup>P NMR (203 MHz, D<sub>2</sub>O, H<sub>3</sub>PO<sub>4</sub>, 25°C)

31P NMR TMGpppSG-3'-link-pgyl\_Izo1

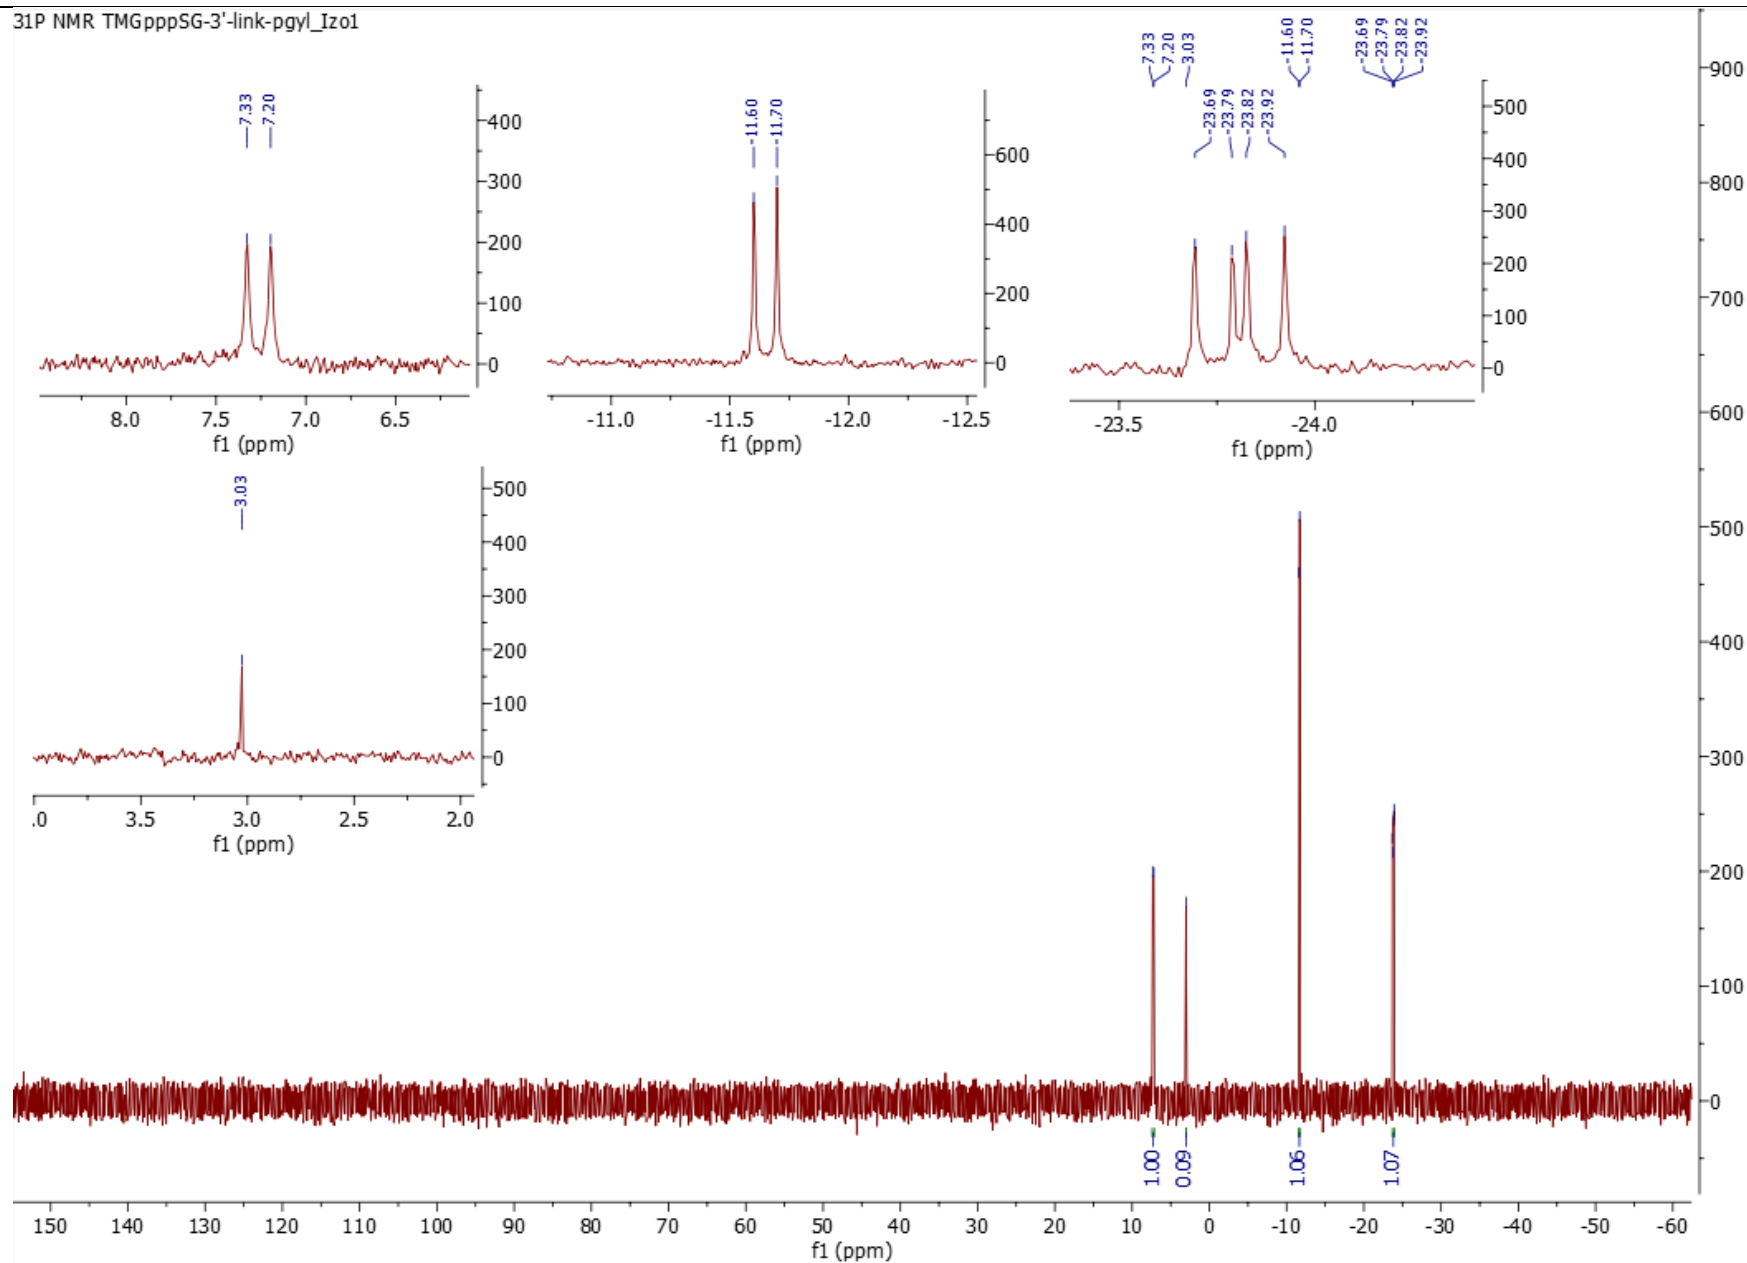

Compound 8: TMGpppG-N1-C<sub>3</sub>H<sub>3</sub> (NH<sub>4</sub><sup>+</sup> salt)

Chemical structure

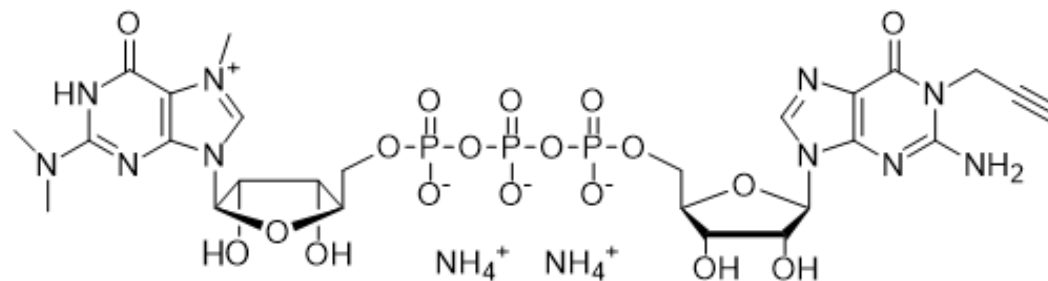

RP-HPLC (conditions c)

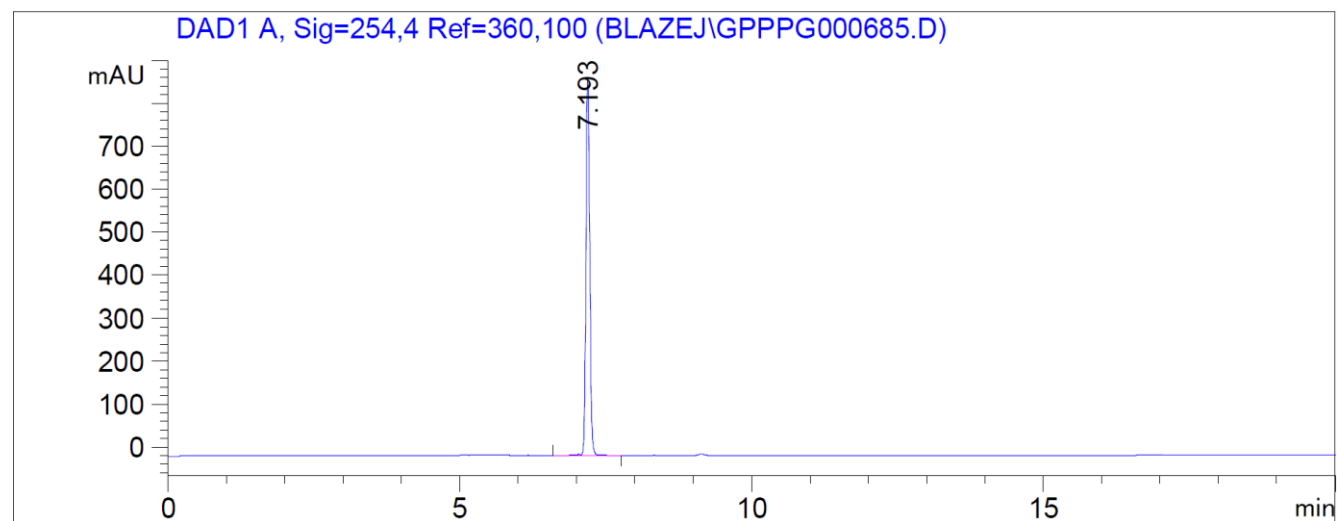

220407\_PSu\_08 #133-181 RT: 1.16-1.58 AV: 49 NL: 1.23E7  
T: FTMS - p ESI Full ms [160.0000-2000.0000]

MS (-) ESI (Calc. [M-H]<sup>-</sup> C<sub>26</sub>H<sub>34</sub>N<sub>10</sub>O<sub>18</sub>P<sub>3</sub><sup>-</sup> : 867.1271, found 867.12887)

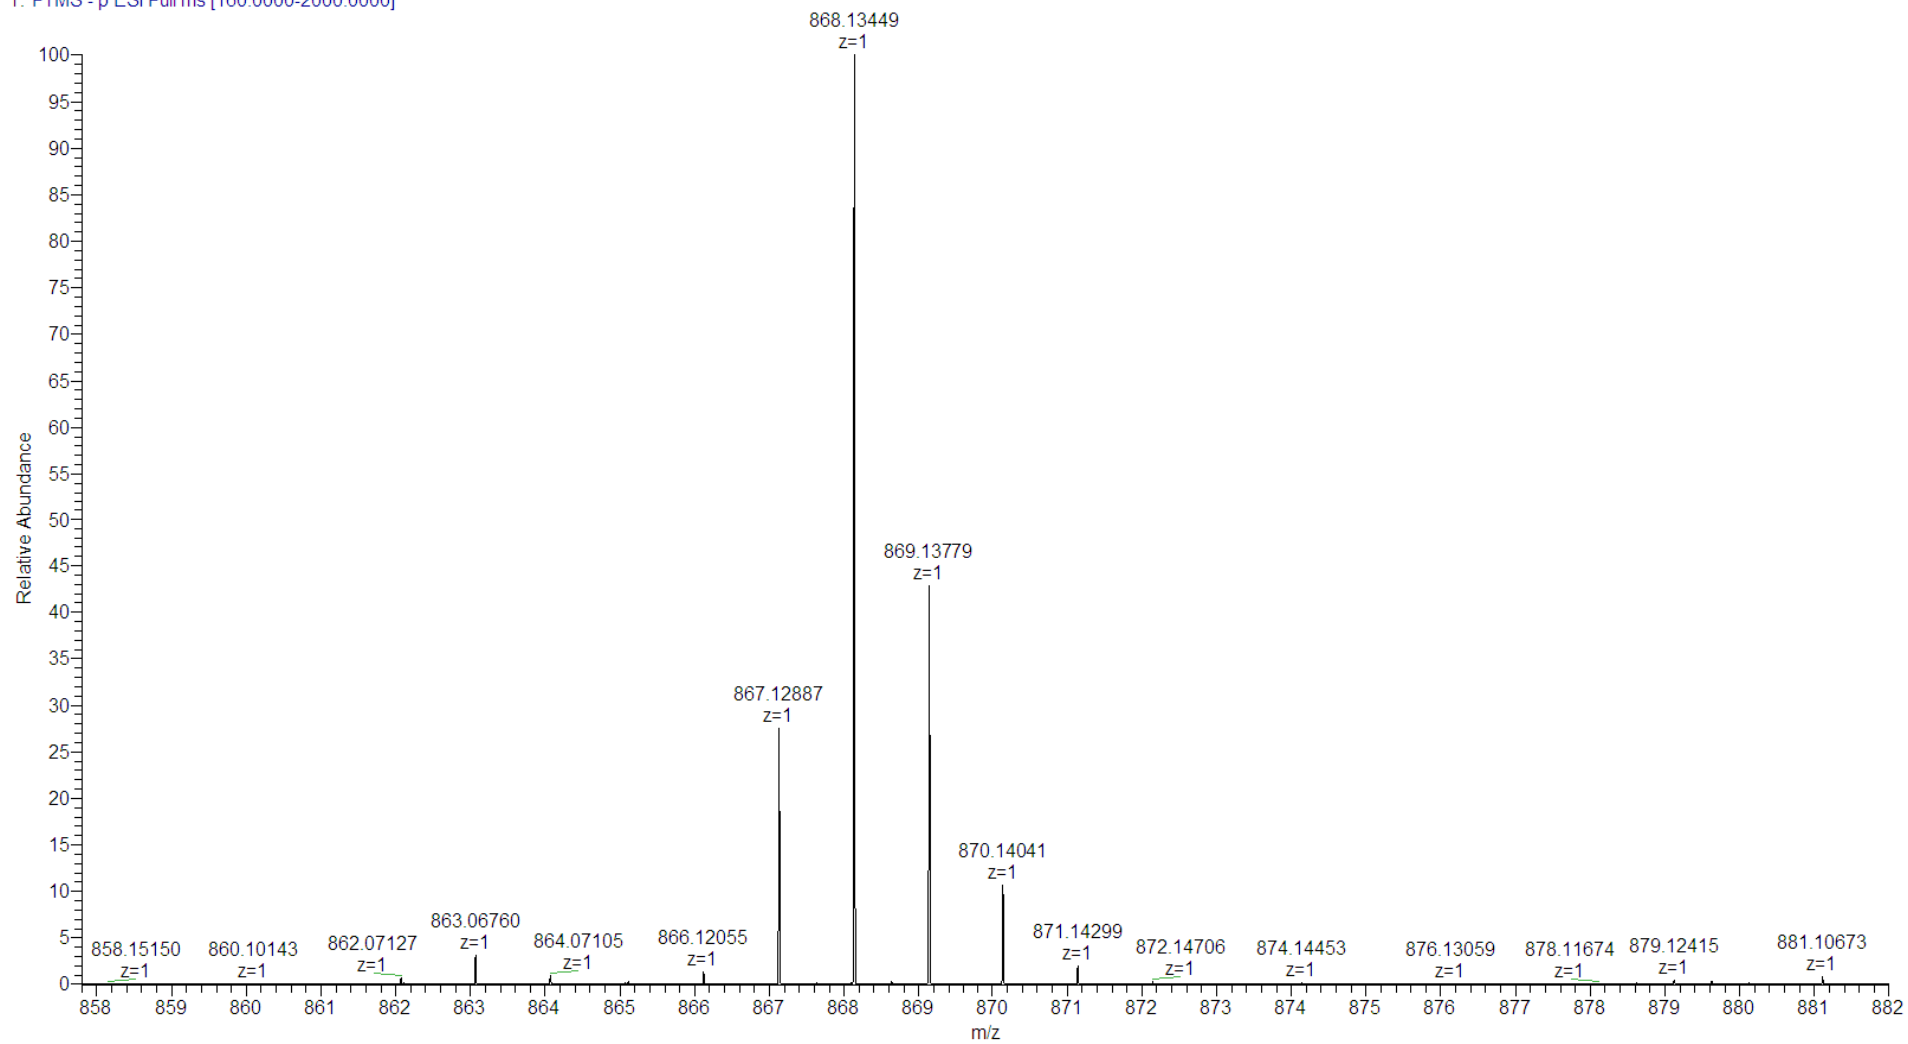

<sup>1</sup>H NMR (500 MHz, D<sub>2</sub>O, 25°C)

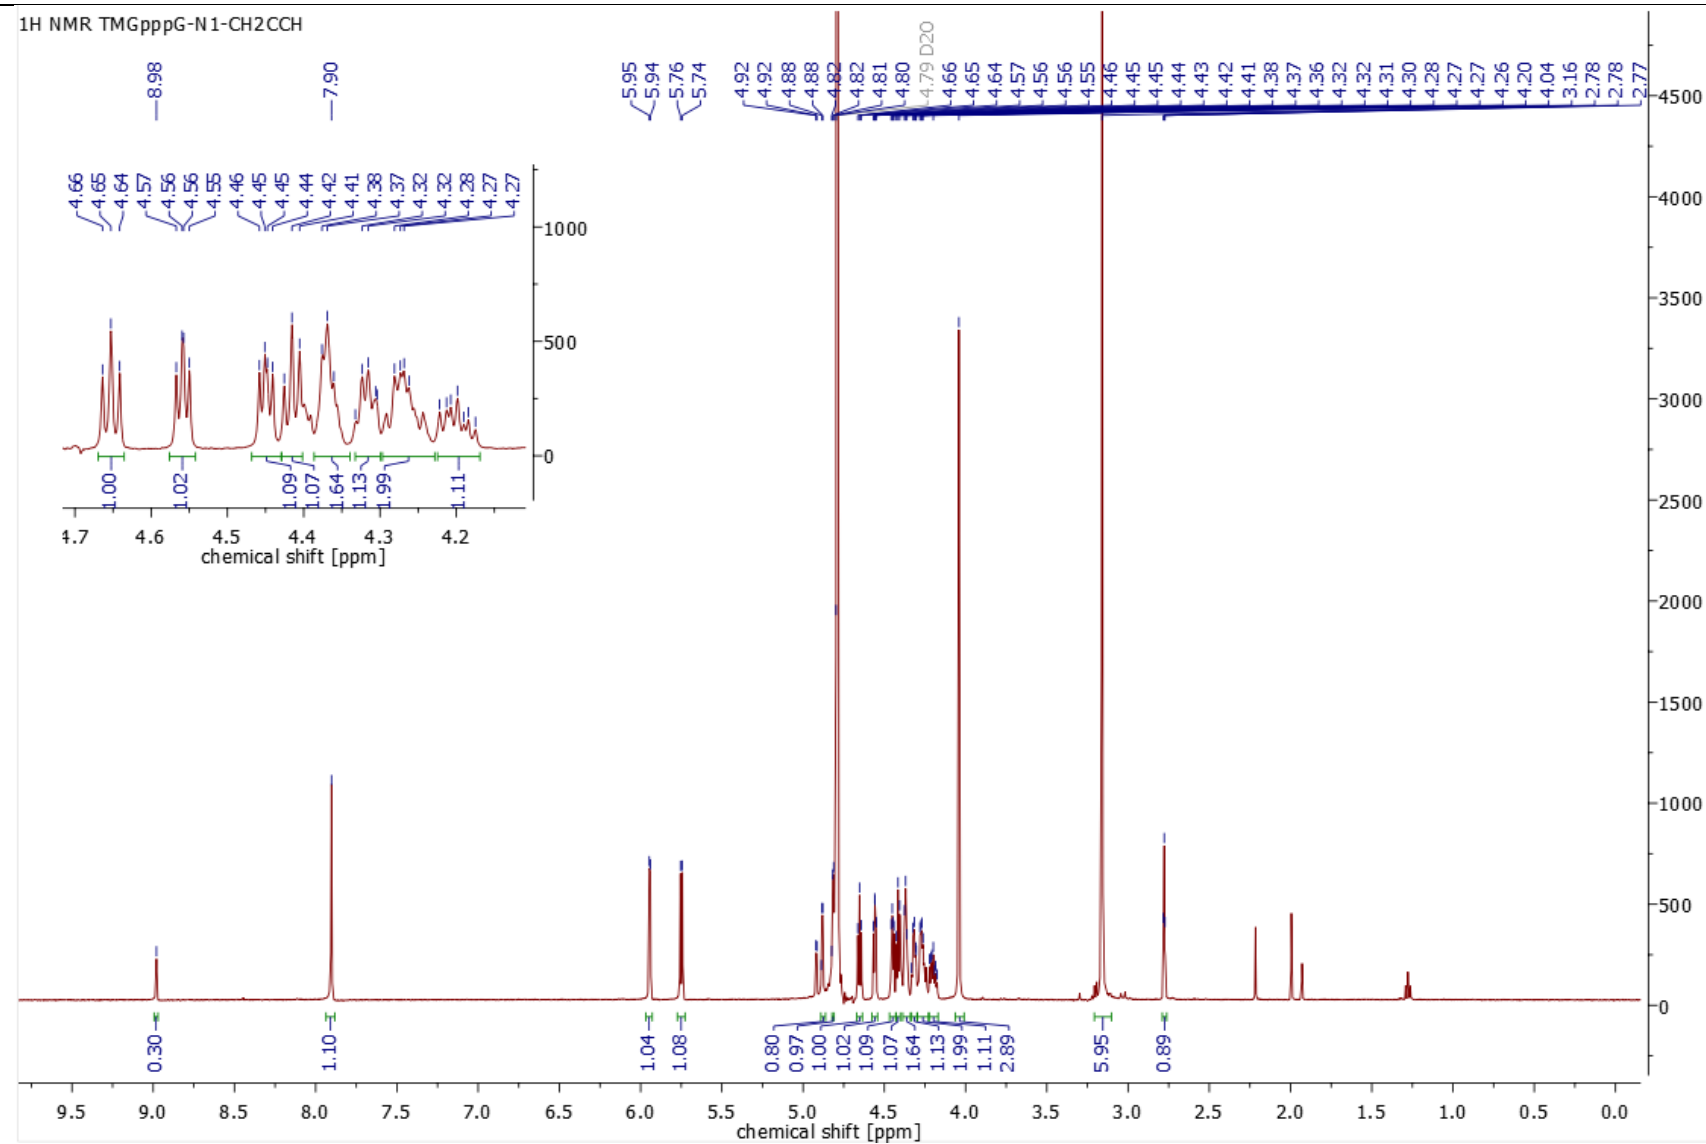

COSY NMR

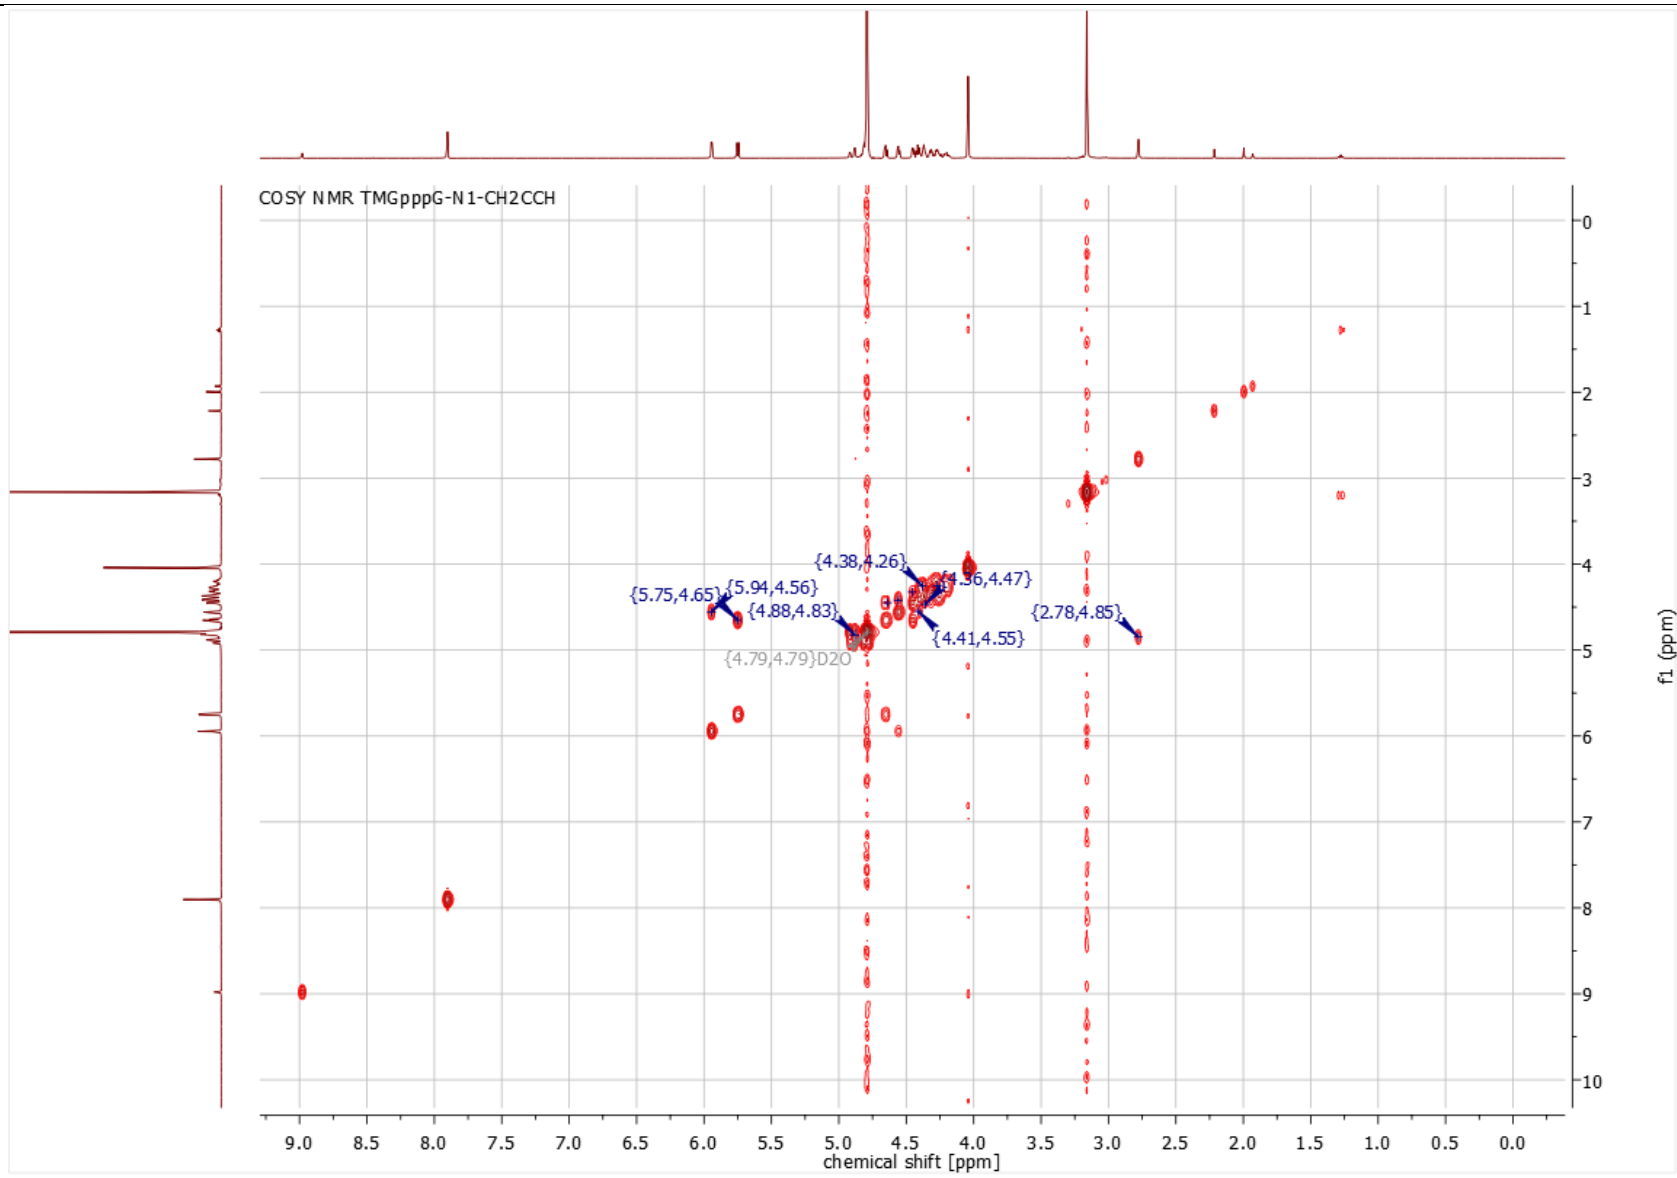

<sup>31</sup>P NMR (203 MHz, D<sub>2</sub>O, H<sub>3</sub>PO<sub>4</sub>, 25°C)

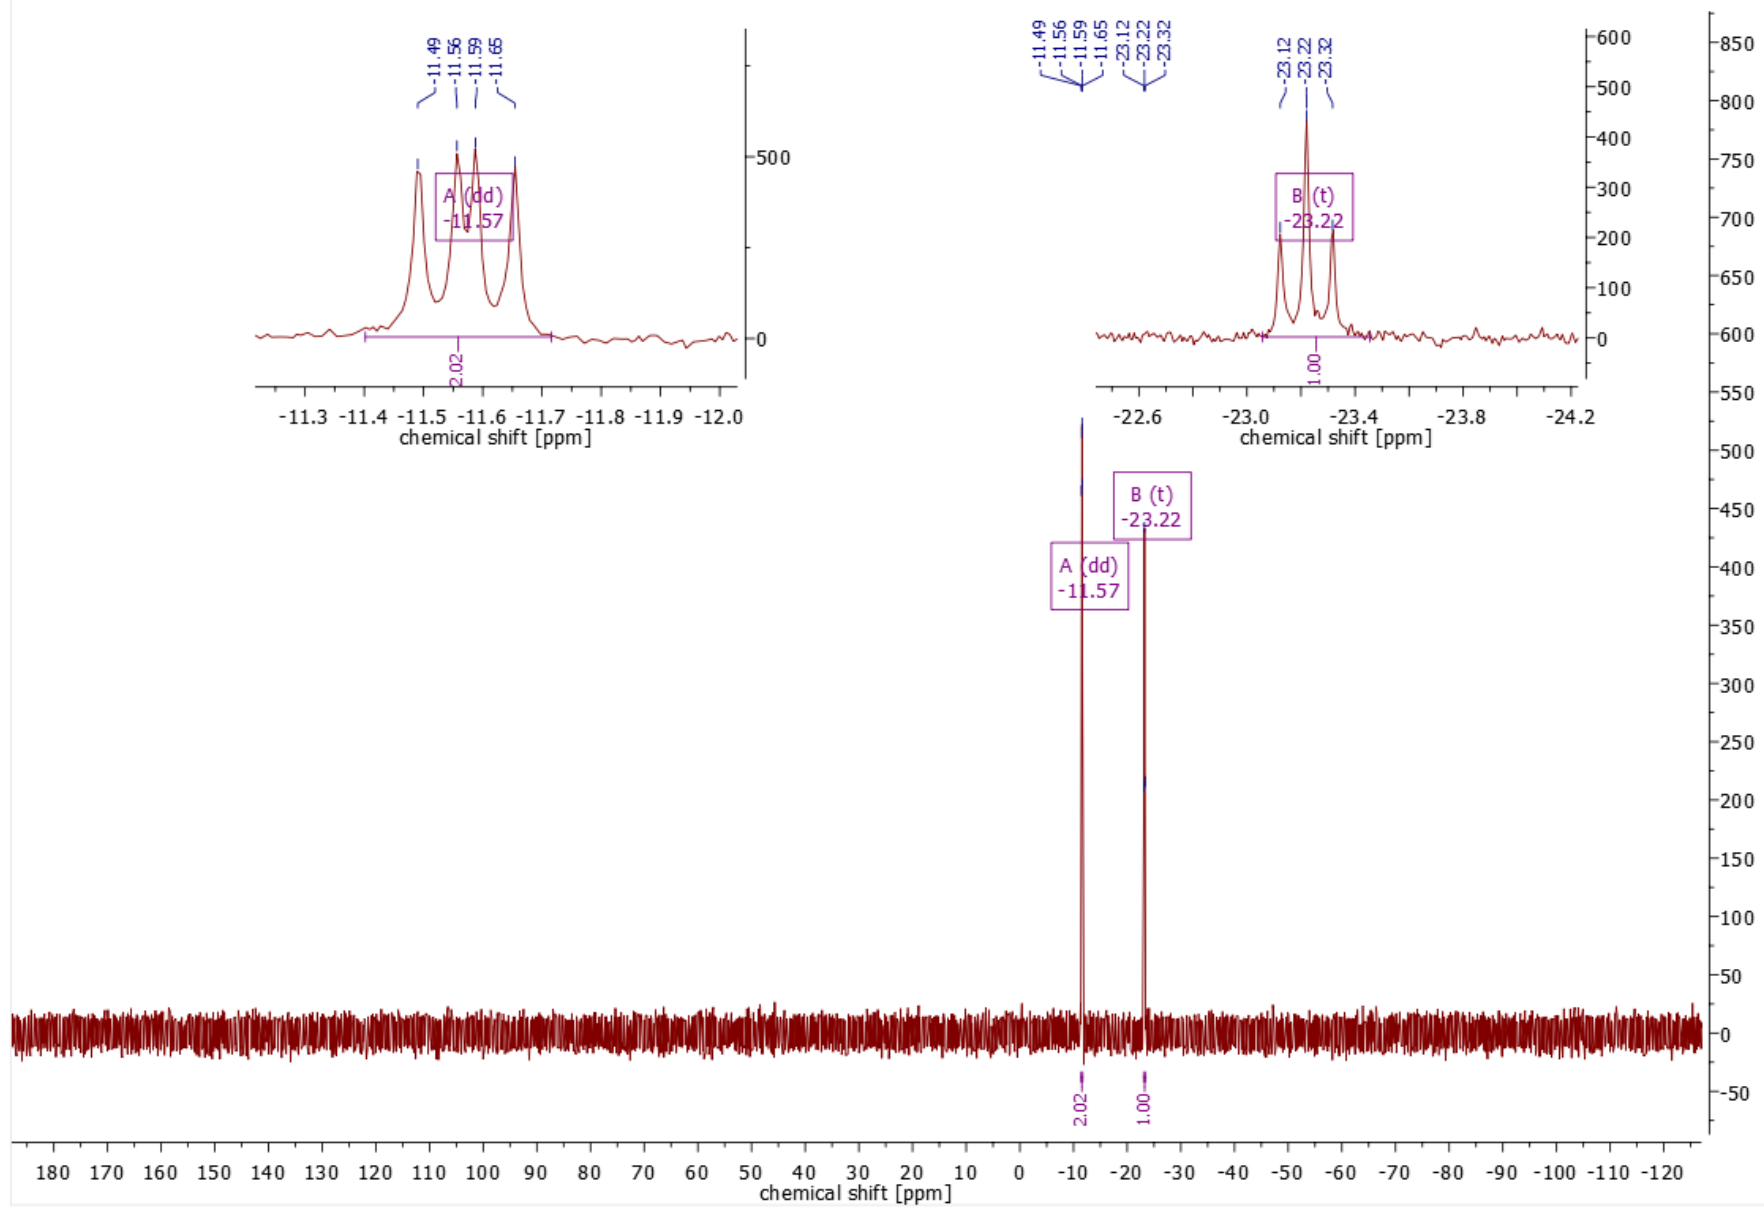

Compound 9-2': TMG(-2'-O-C(O)-NH-CH<sub>2</sub>CH<sub>2</sub>-N<sub>3</sub>)pppG (NH<sub>4</sub><sup>+</sup> salt)

Chemical structure

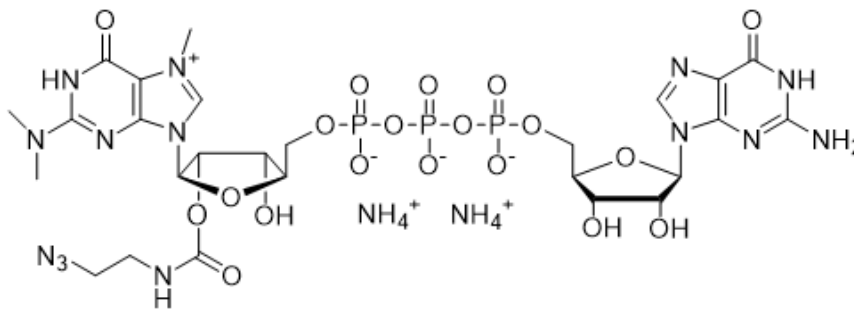

RP-HPLC (conditions c)

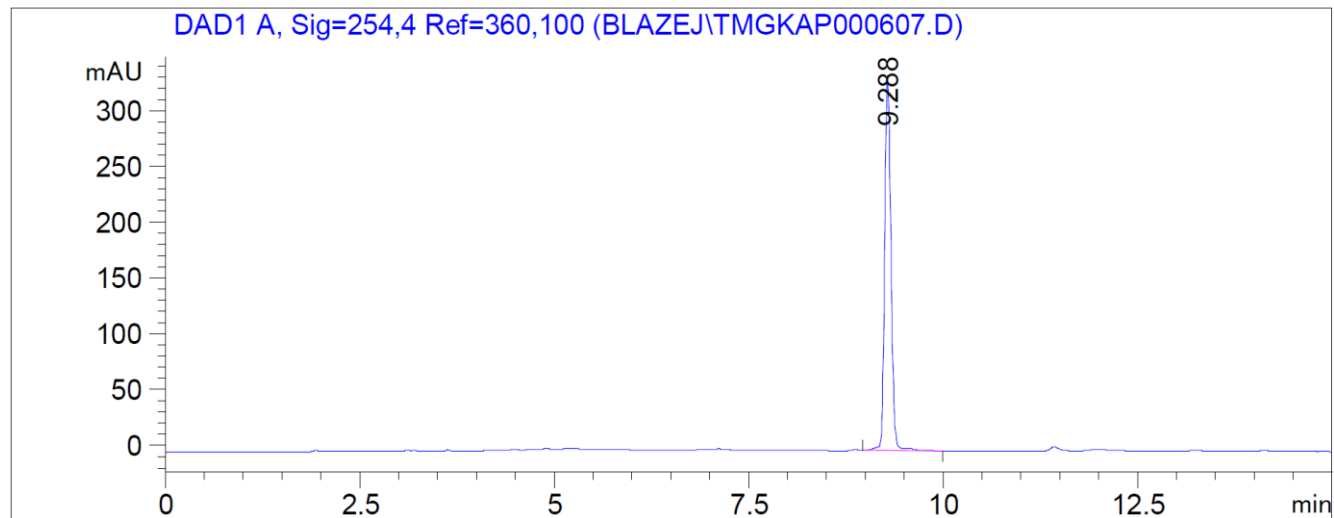

MS (-) ESI (Calc. [M-H]<sup>-</sup> C<sub>26</sub>H<sub>36</sub>N<sub>4</sub>O<sub>19</sub>P<sub>3</sub><sup>-</sup> : 941.1500, found: 941.15111)

220329\_PSu\_16 #167-255 RT: 1.46-2.22 AV: 89 NL: 1.67E8  
T: FTMS - p ESI Full ms [160.0000-2000.0000]

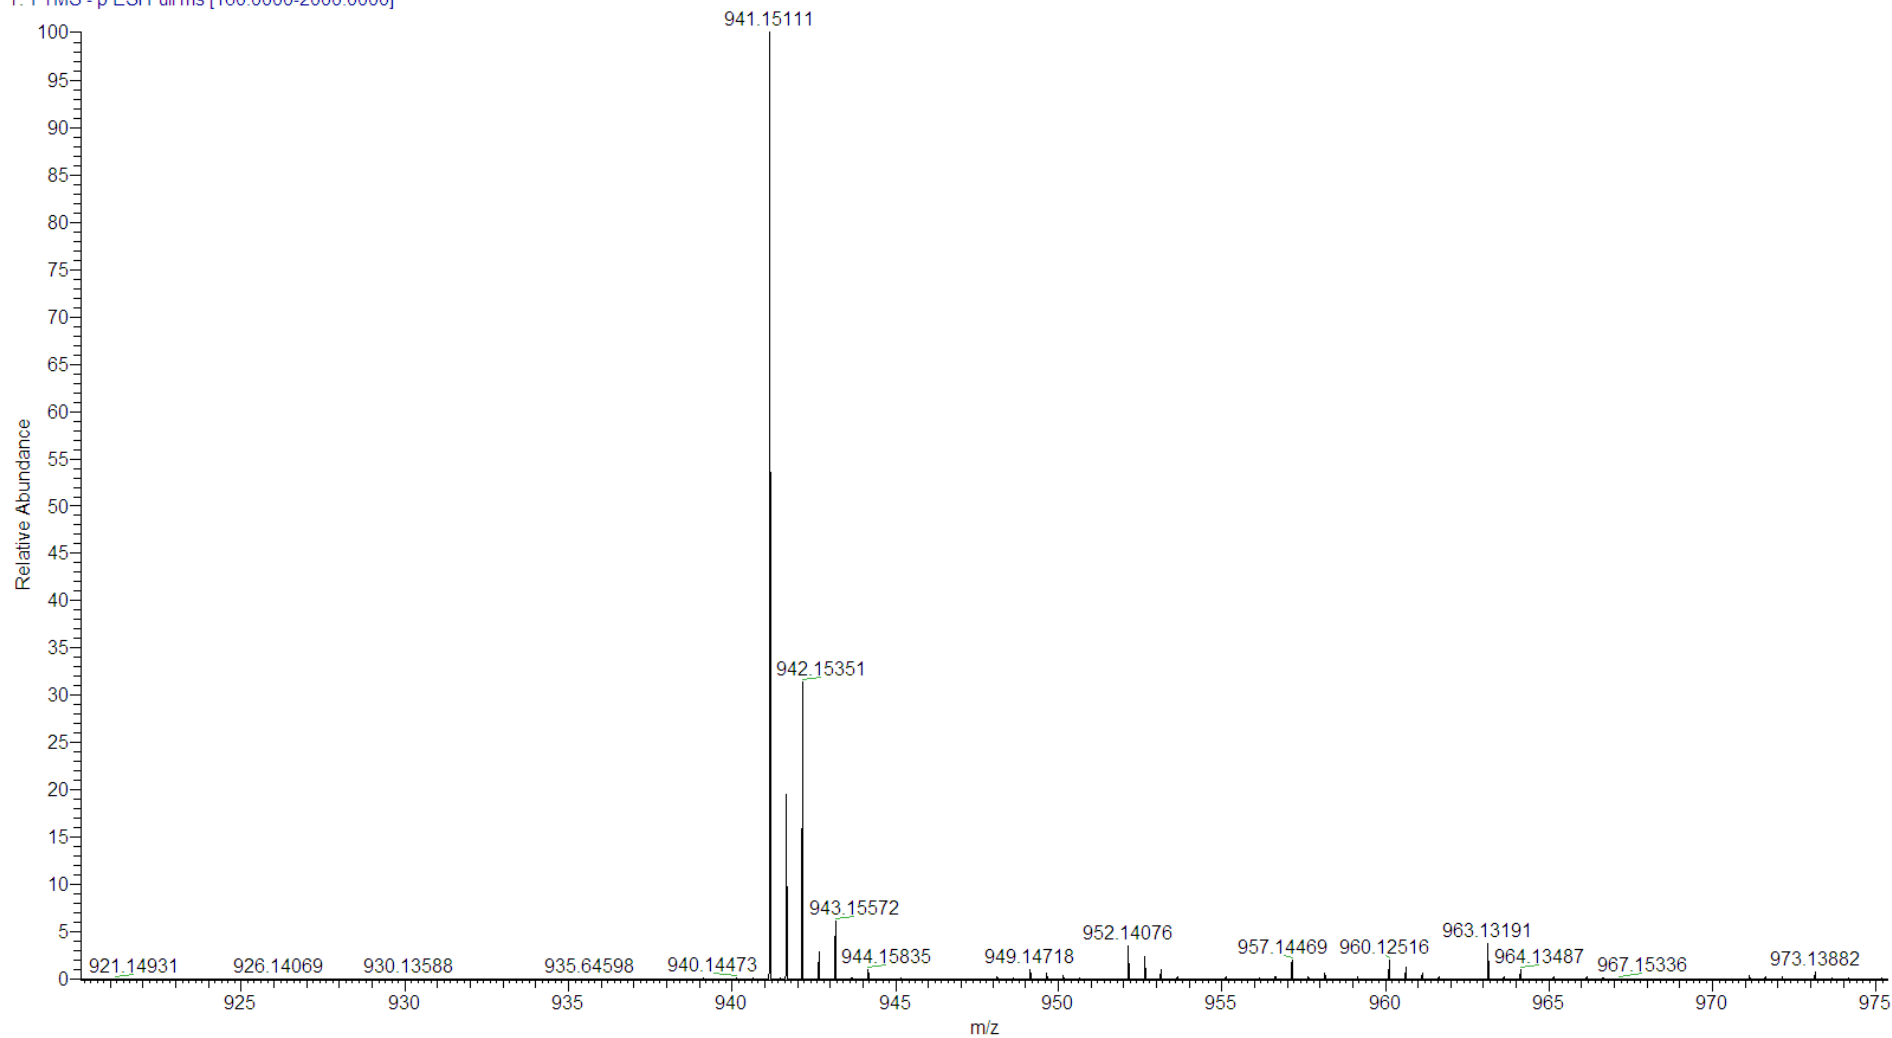



<sup>1</sup>H NMR (500 MHz, D<sub>2</sub>O, 25°C)

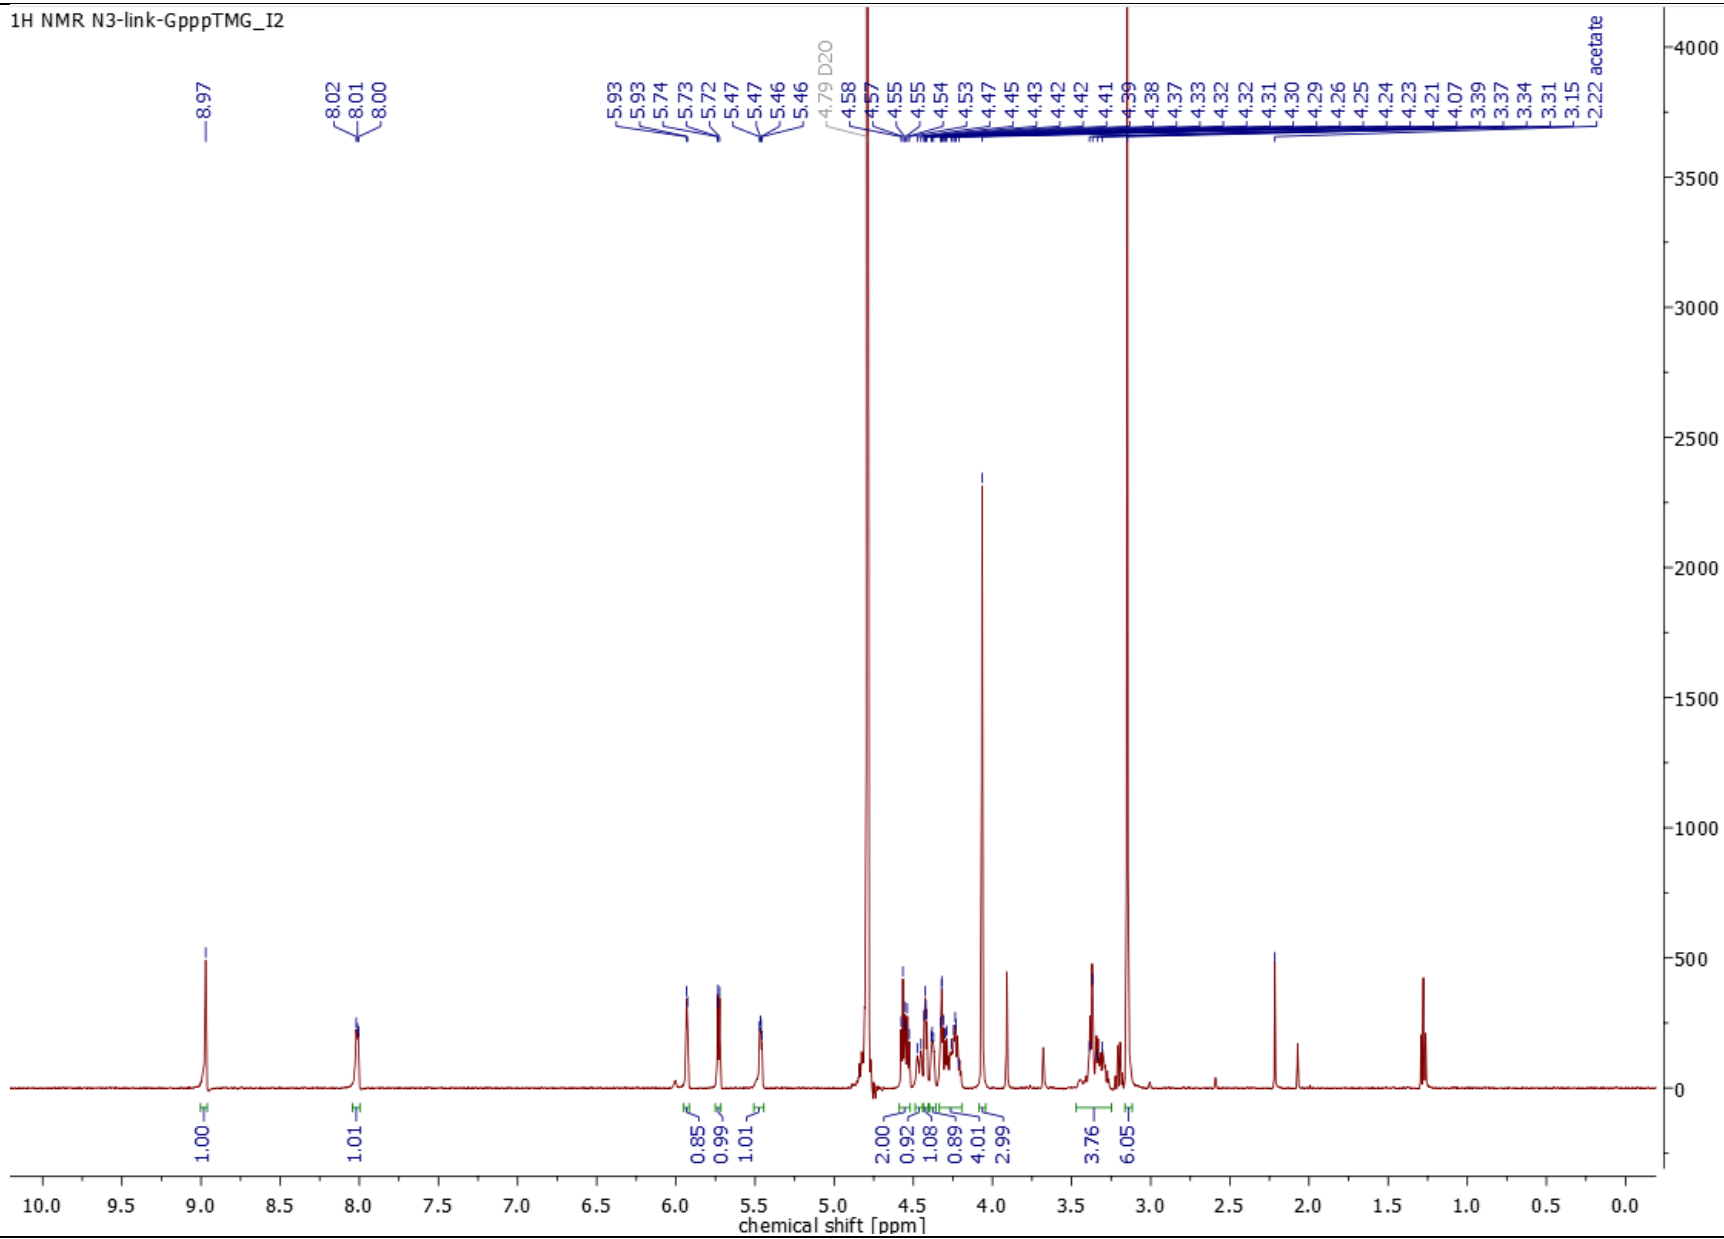

COSY NMR

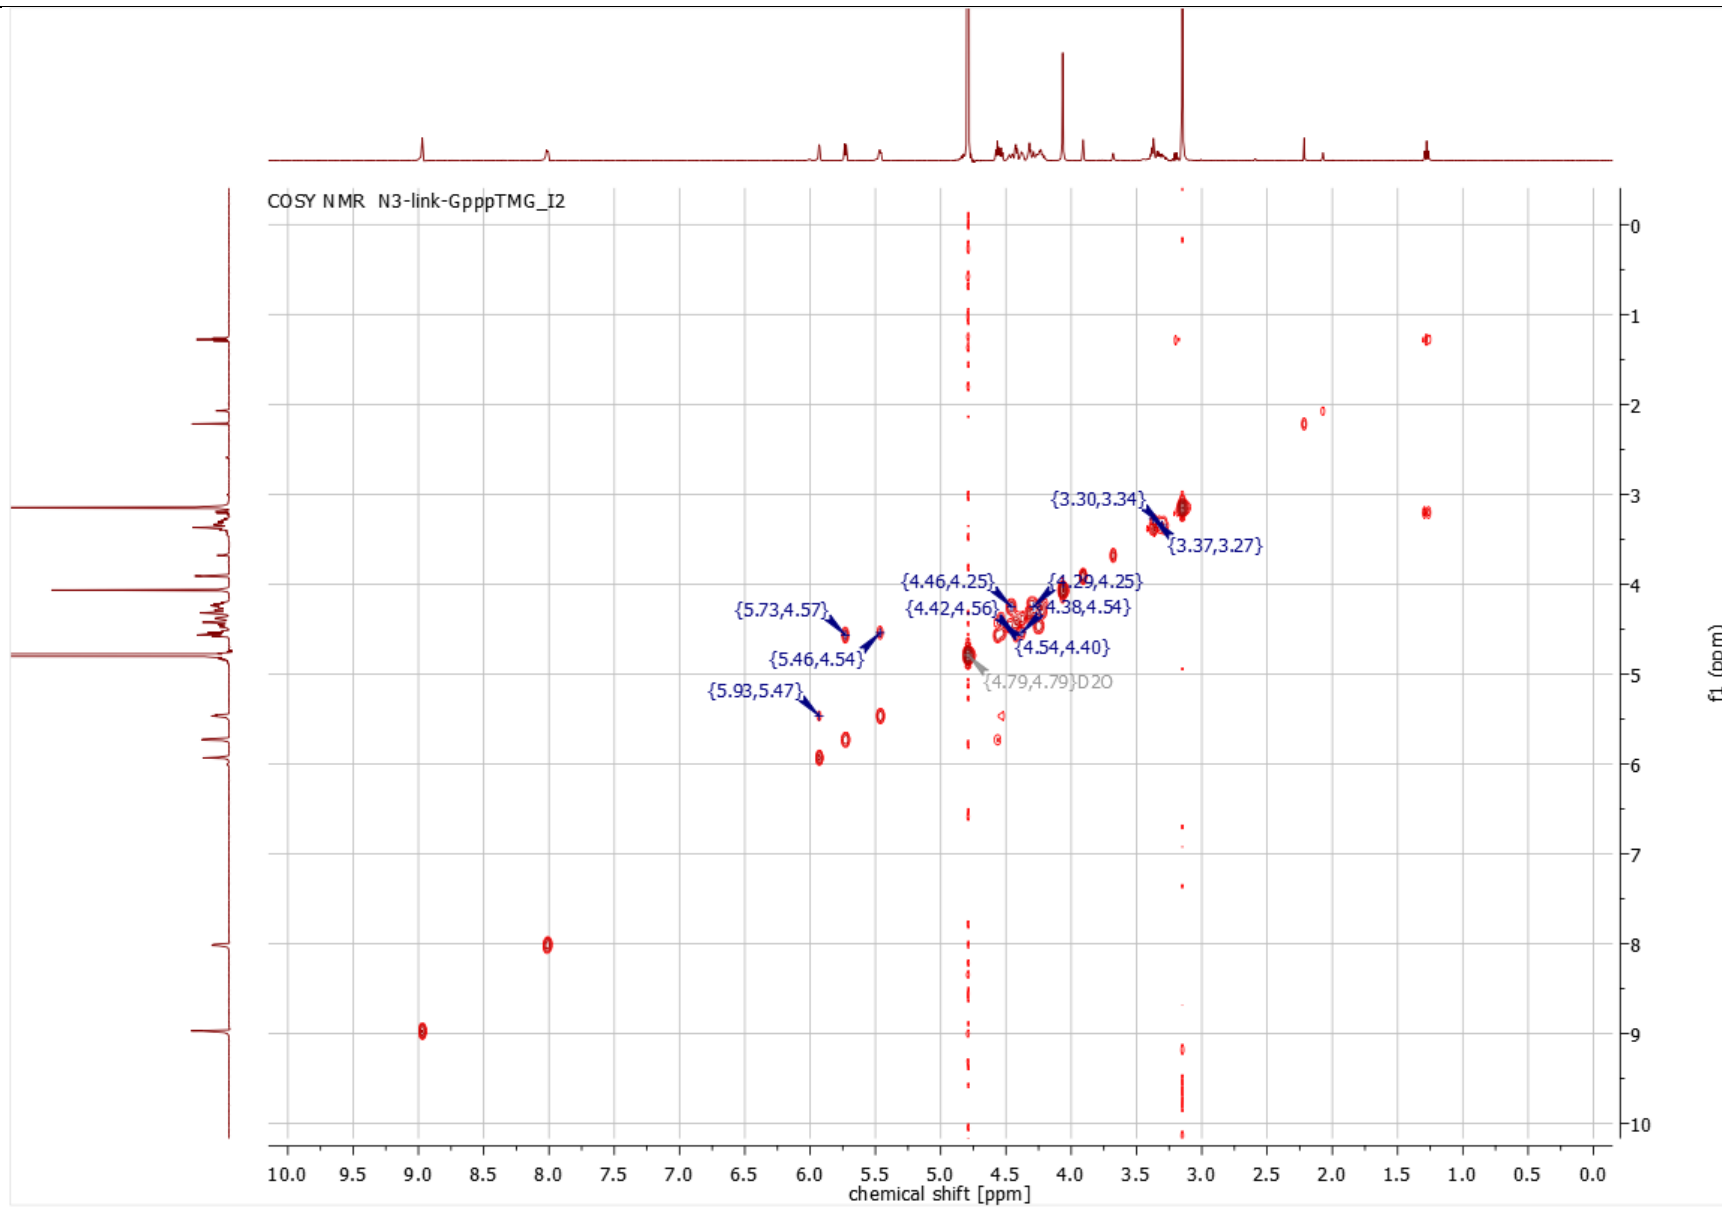

$^{31}\text{P}$  NMR (203 MHz,  $\text{D}_2\text{O}$ ,  $\text{H}_3\text{PO}_4$ ,  $25^\circ\text{C}$ )

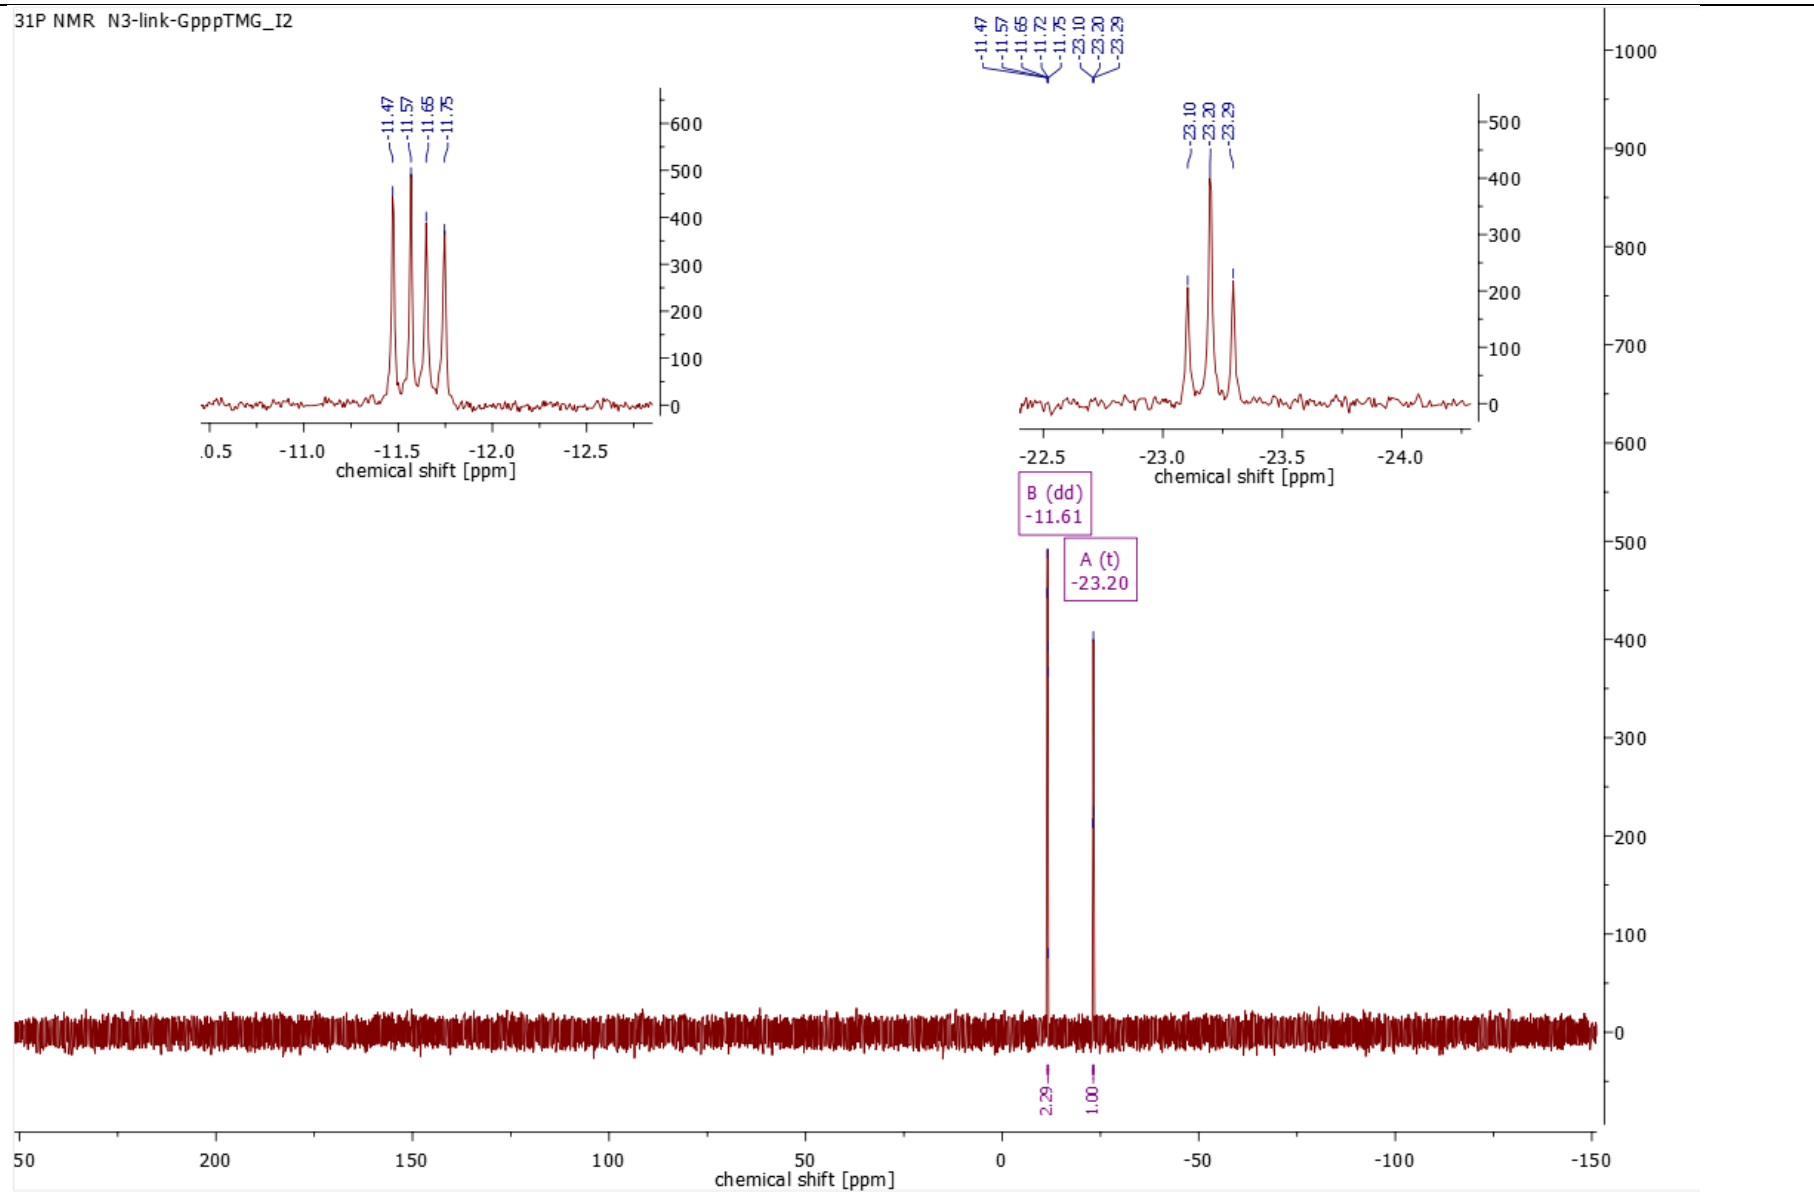

Compound 9-3': TMG(-3'-O-C(O)-NH-CH<sub>2</sub>CH<sub>2</sub>-N<sub>3</sub>)pppG (NH<sub>4</sub><sup>+</sup> salt)

Chemical structure

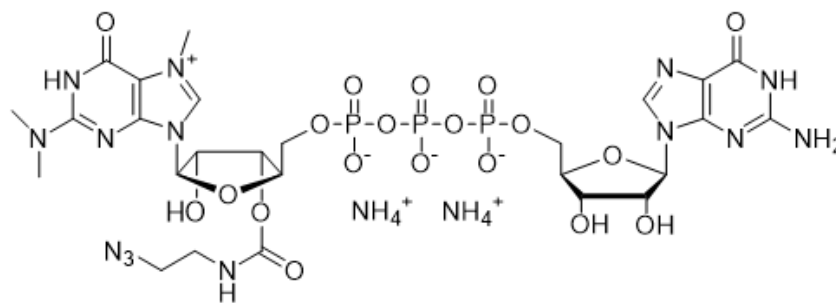

RP-HPLC (conditions c)

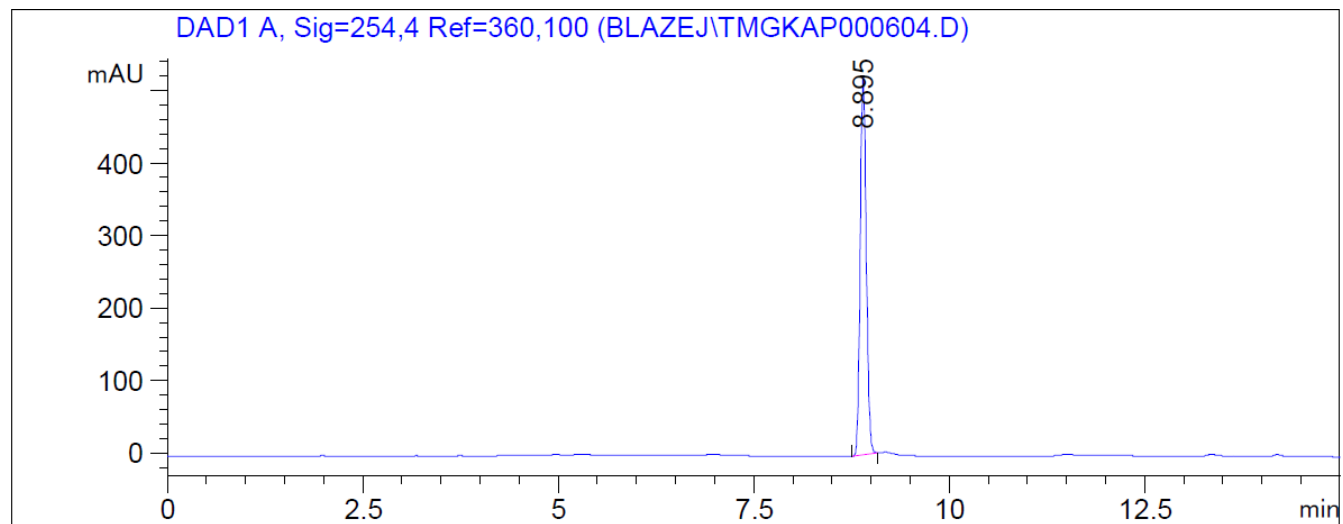

220329\_PSu\_17 #194-314 RT: 1.69-2.74 AV: 121 NL: 2.10E4  
T: FTMS - p ESI Full ms [160.0000-2000.0000]

MS (-) ESI (Calc. [M-H]<sup>-</sup> C<sub>26</sub>H<sub>36</sub>N<sub>14</sub>O<sub>19</sub>P<sub>3</sub><sup>-</sup> : 941.1500, found: 941.15114)

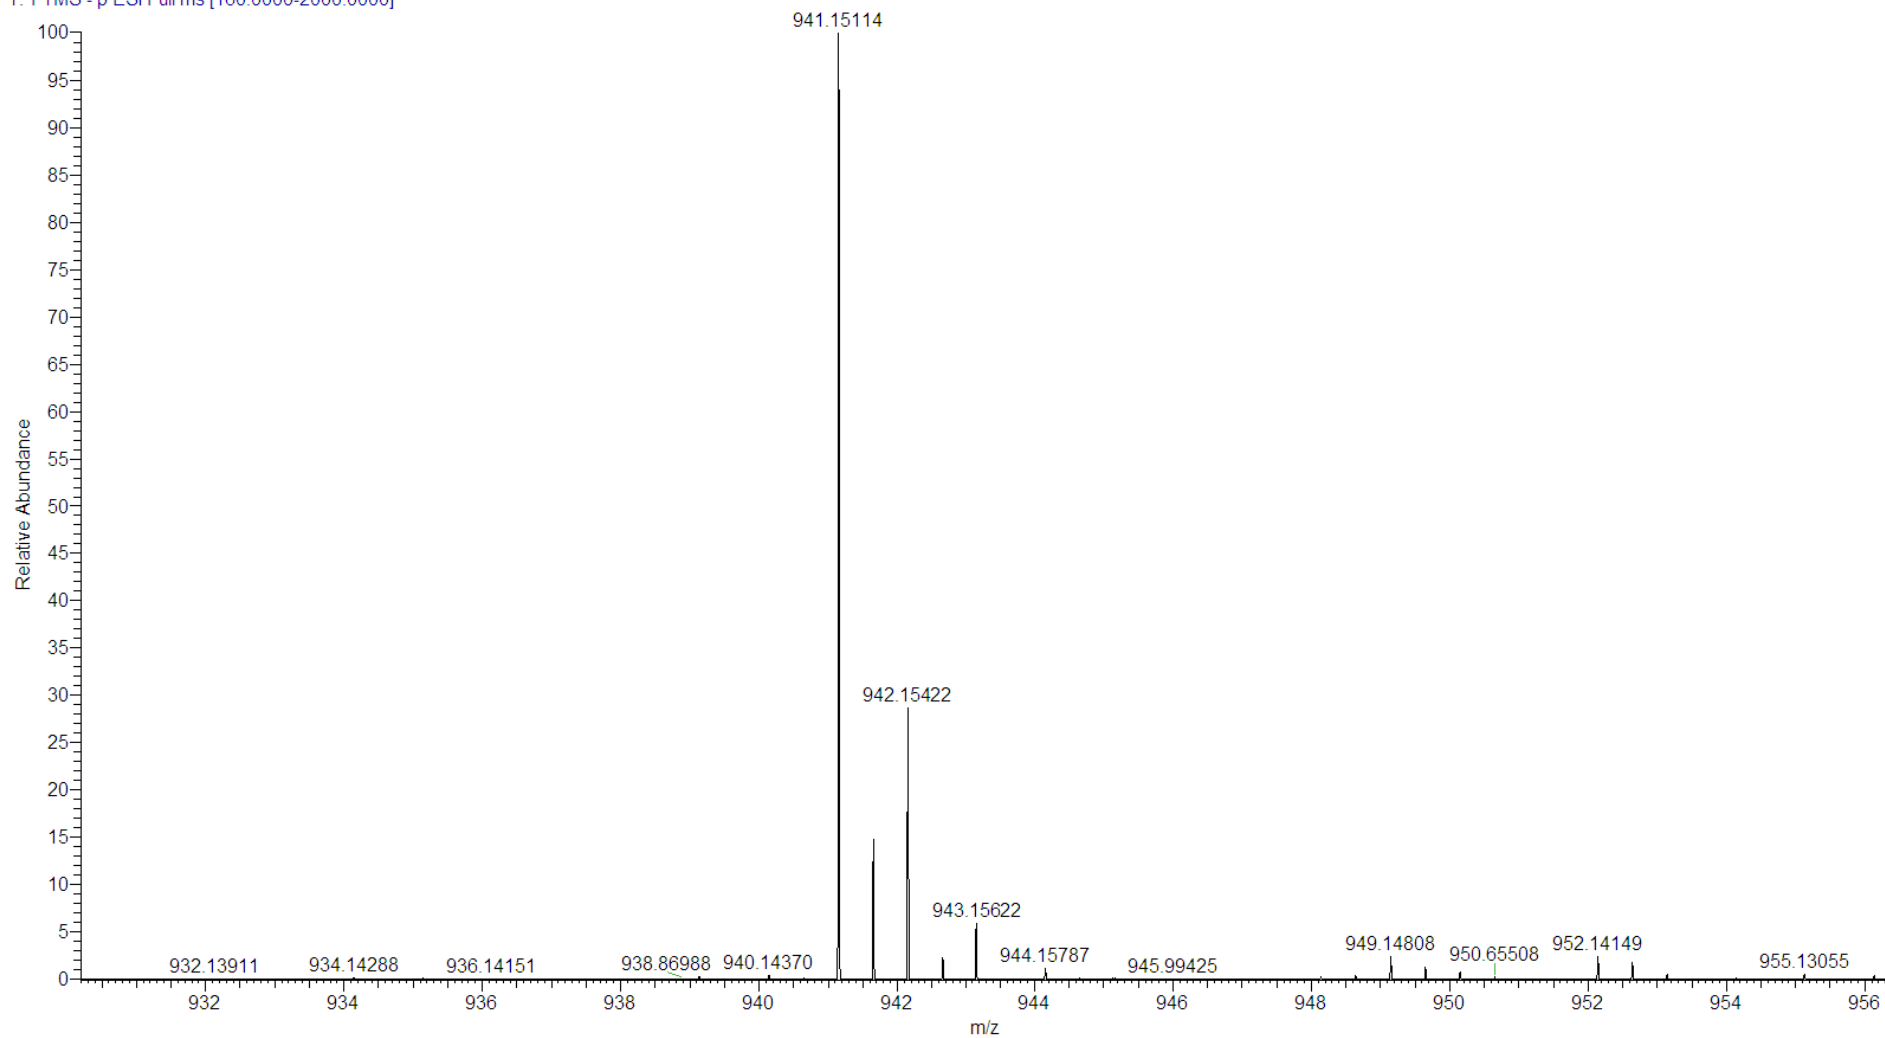

<sup>1</sup>H NMR (500 MHz, D<sub>2</sub>O, 25°C)

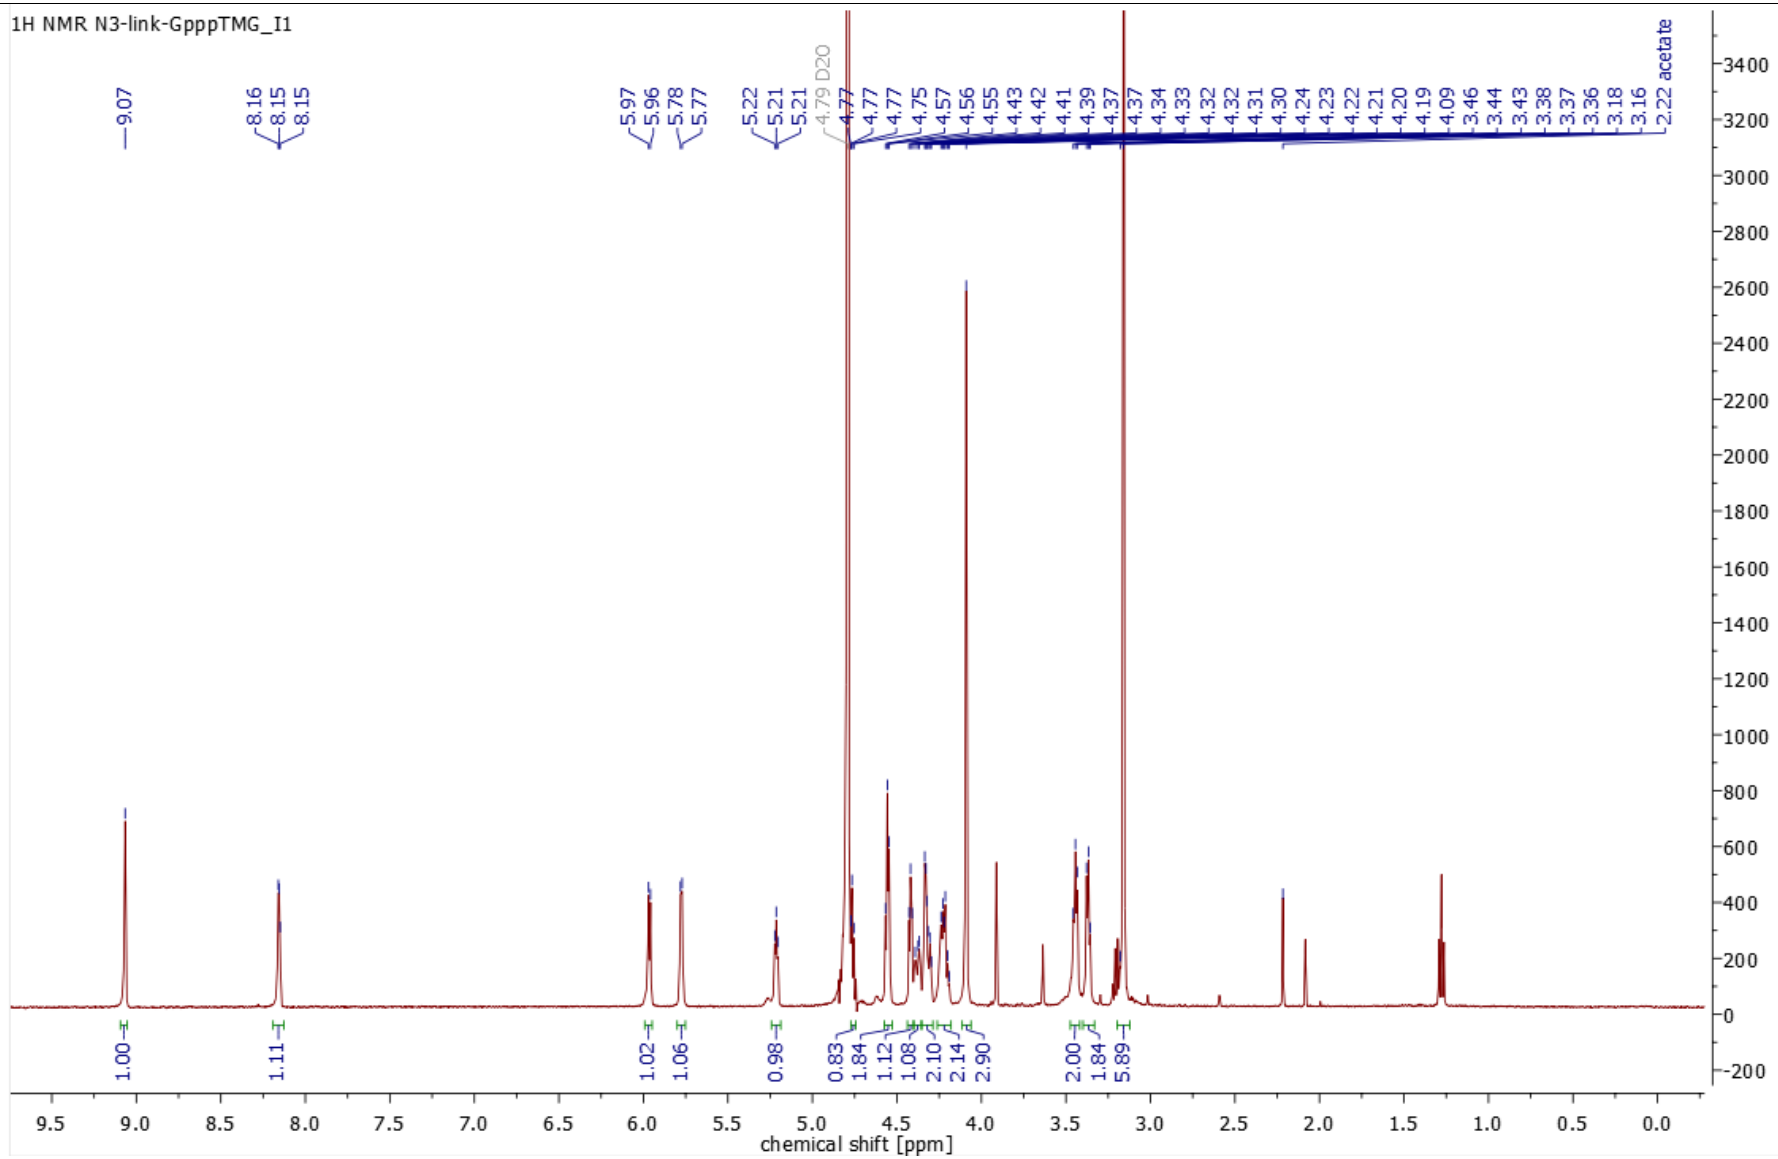

COSY NMR

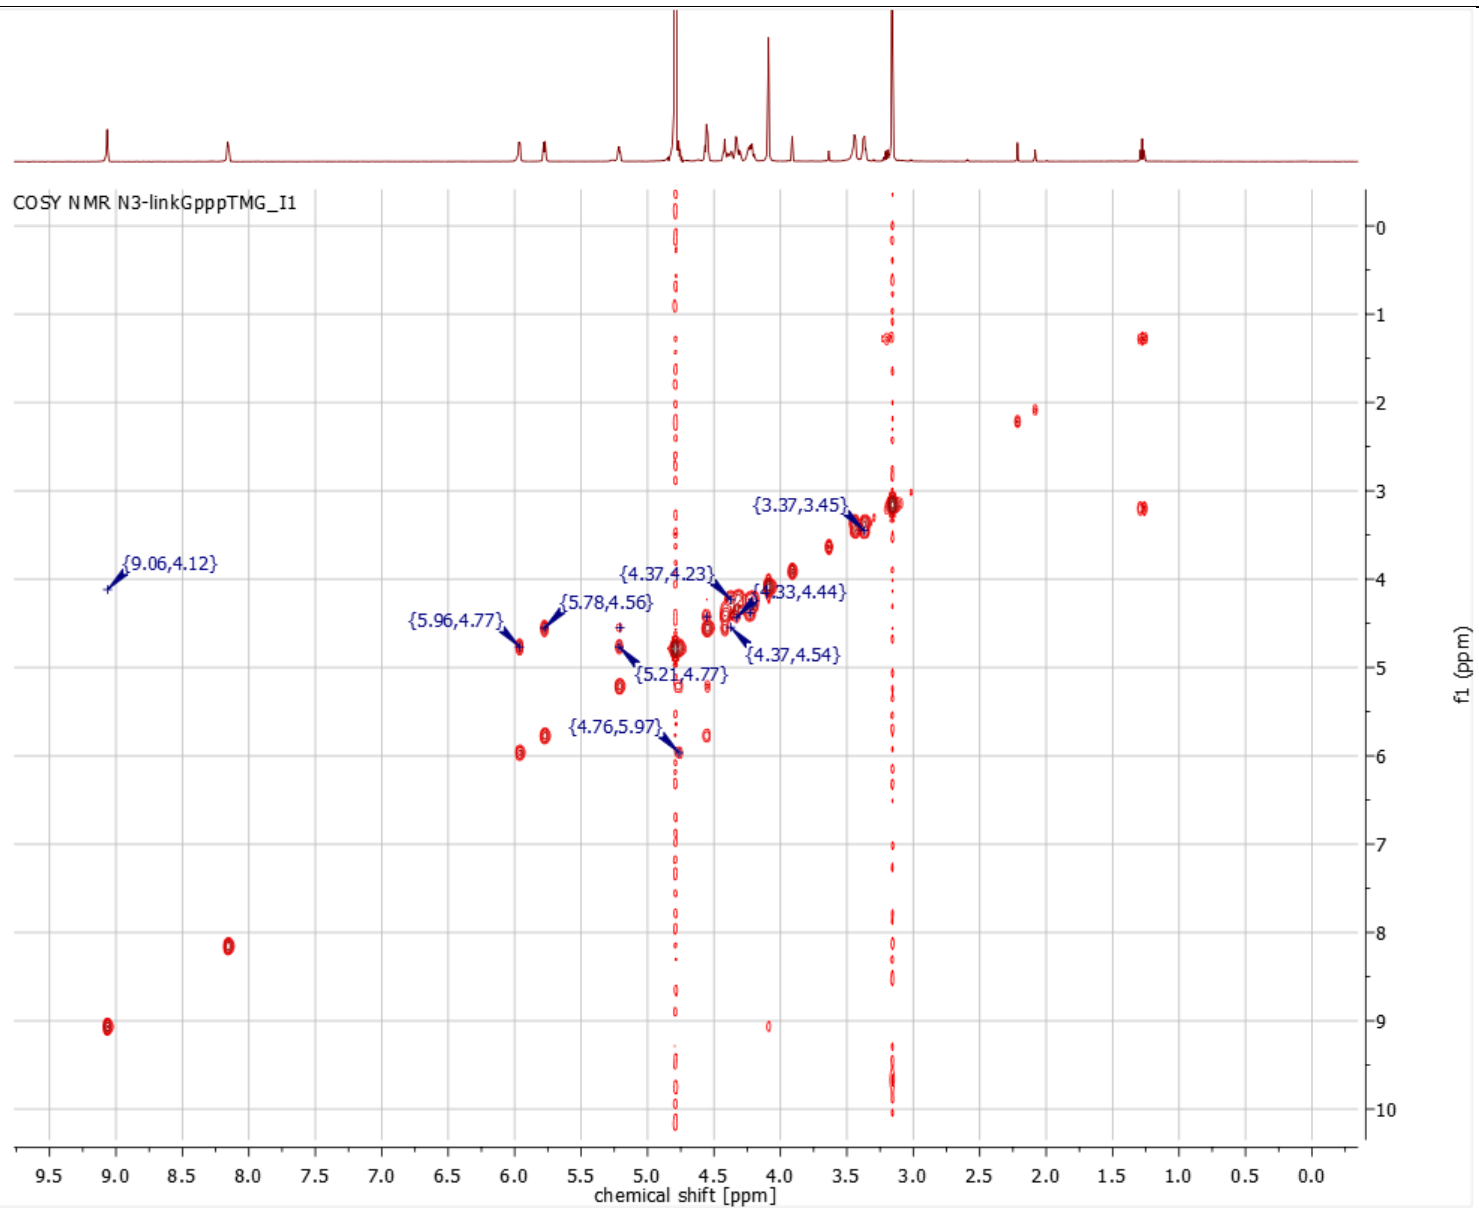

<sup>31</sup>P NMR (203 MHz, D<sub>2</sub>O, H<sub>3</sub>PO<sub>4</sub>, 25°C)

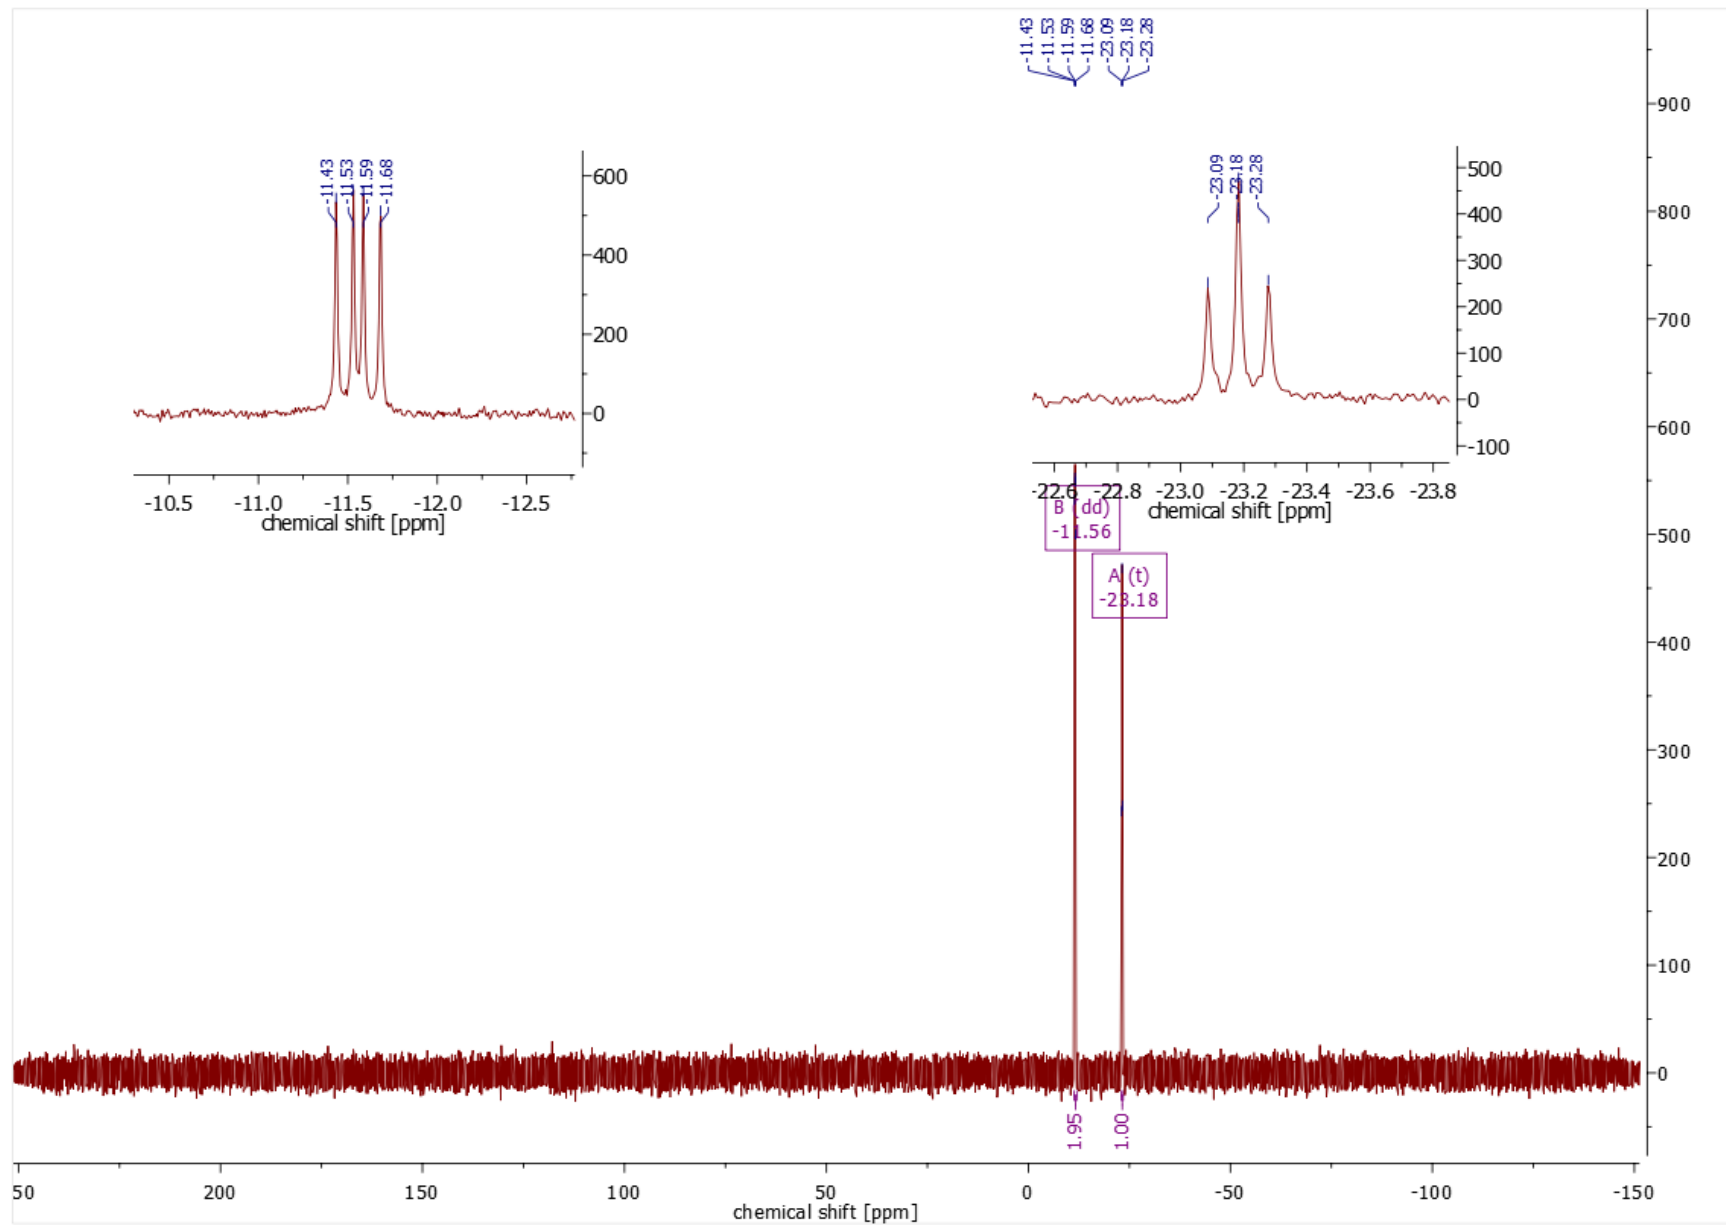



Compound 10-2': GMP-2'-O-C(O)-NH-CH<sub>2</sub>CH<sub>2</sub>-N<sub>3</sub> (NH<sub>4</sub><sup>+</sup> salt)

Chemical structure

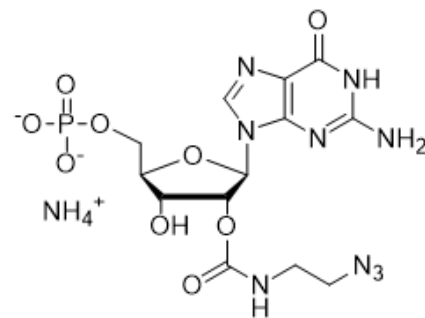

RP-HPLC (conditions c)

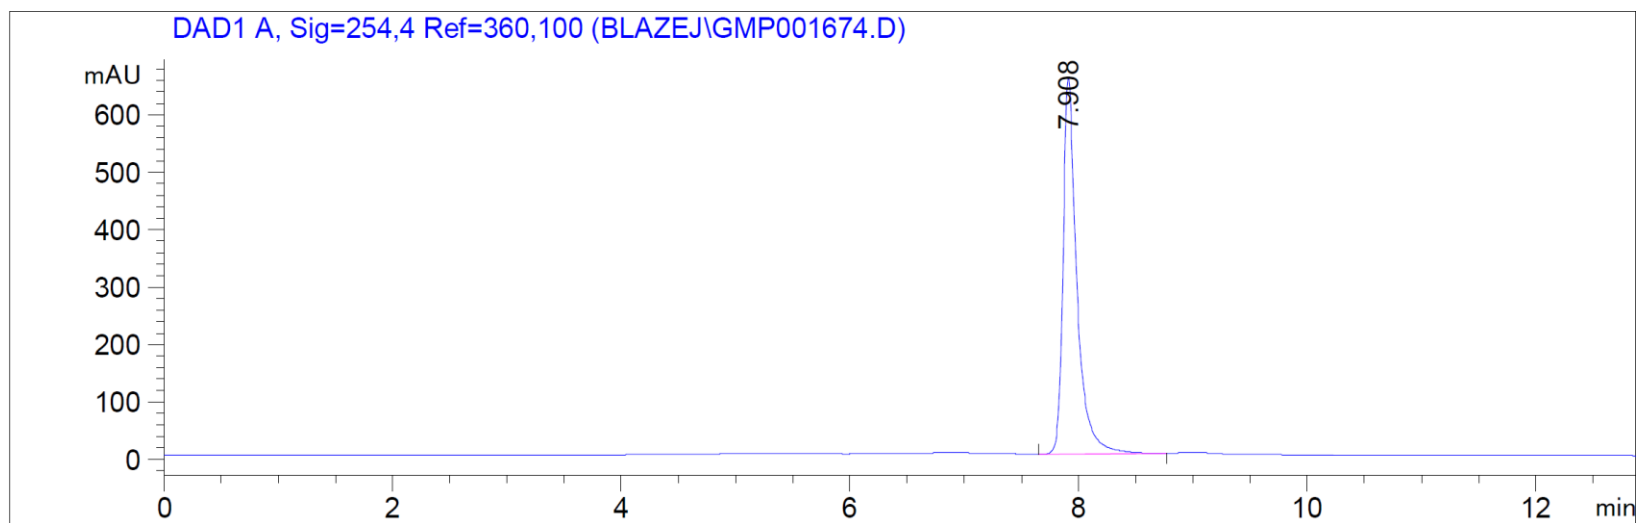

220331\_PSu\_04 #194-269 RT: 1.70-2.35 AV: 76 NL: 2.04E8  
T: FTMS - p ESI Full ms [160.0000-2000.0000]

MS (-) ESI (Calc. [M-H]<sup>-</sup> C<sub>13</sub>H<sub>17</sub>N<sub>9</sub>O<sub>9</sub>P<sup>-</sup> : 474.0892, found: 474.08924)

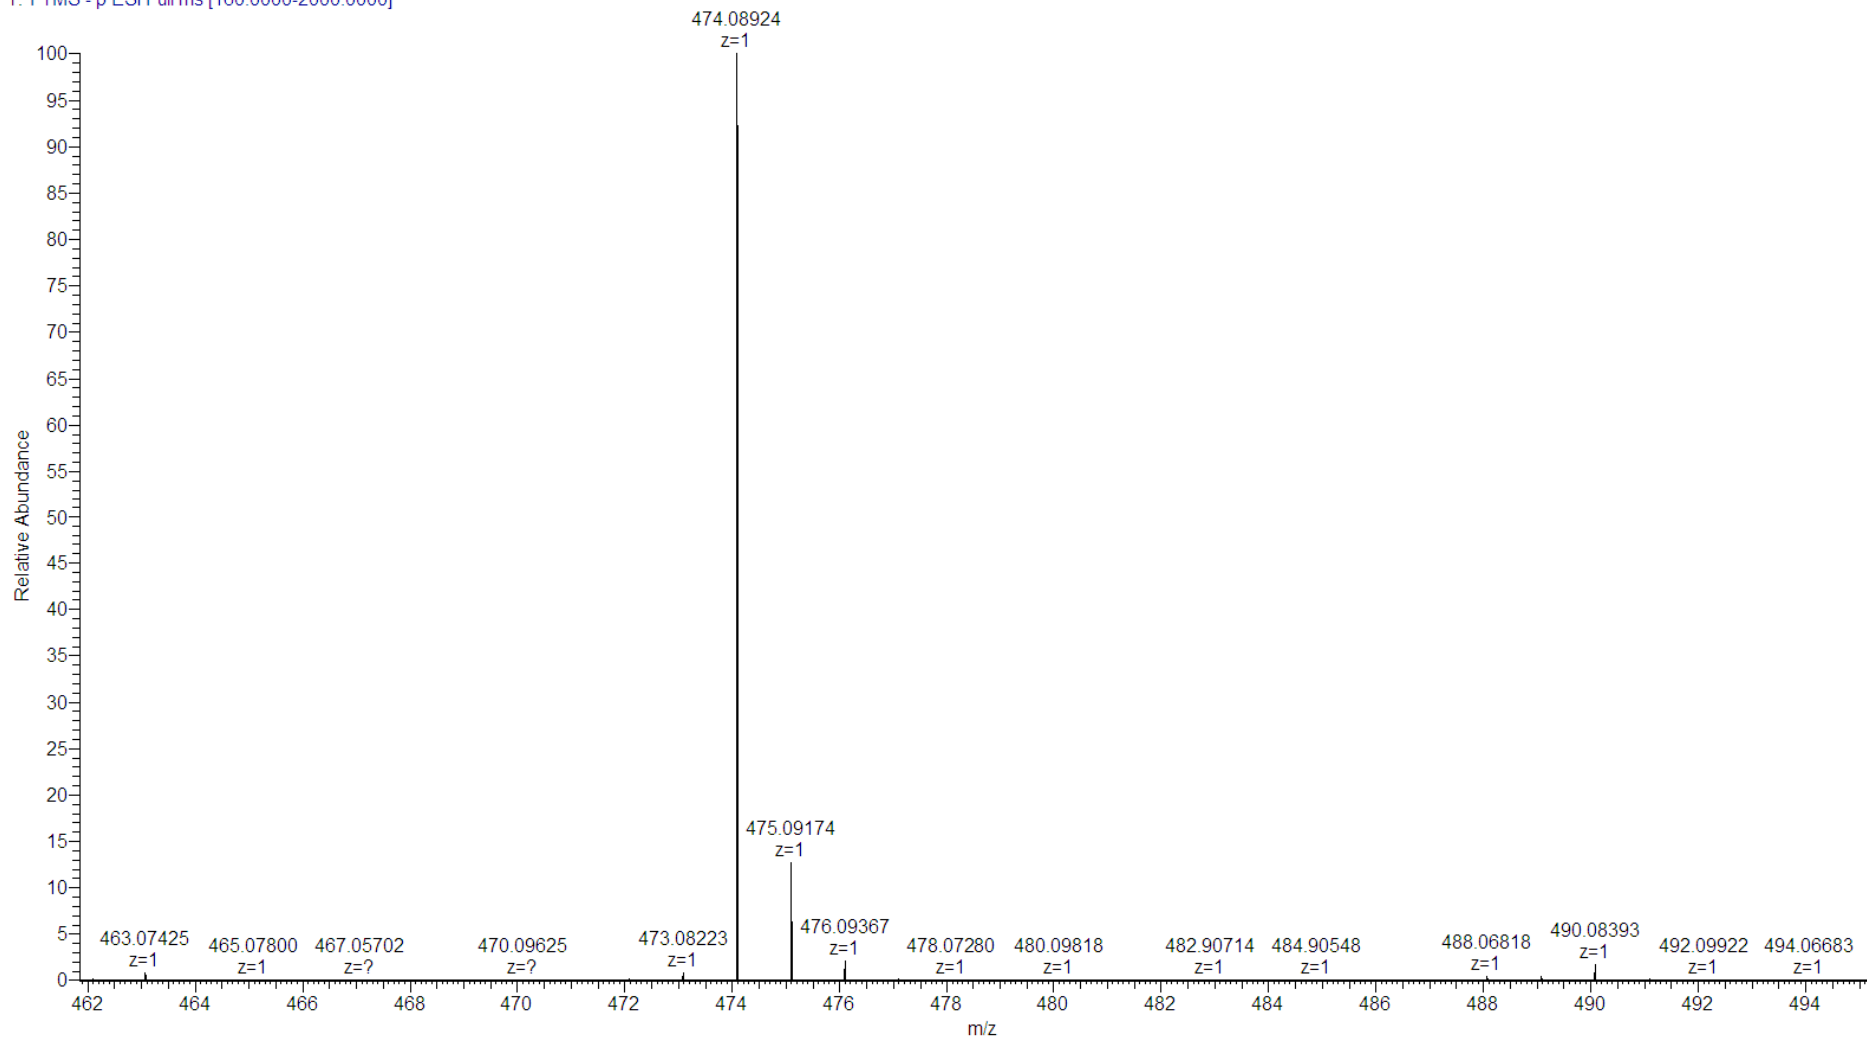

<sup>1</sup>H NMR (500 MHz, D<sub>2</sub>O, 25°C)

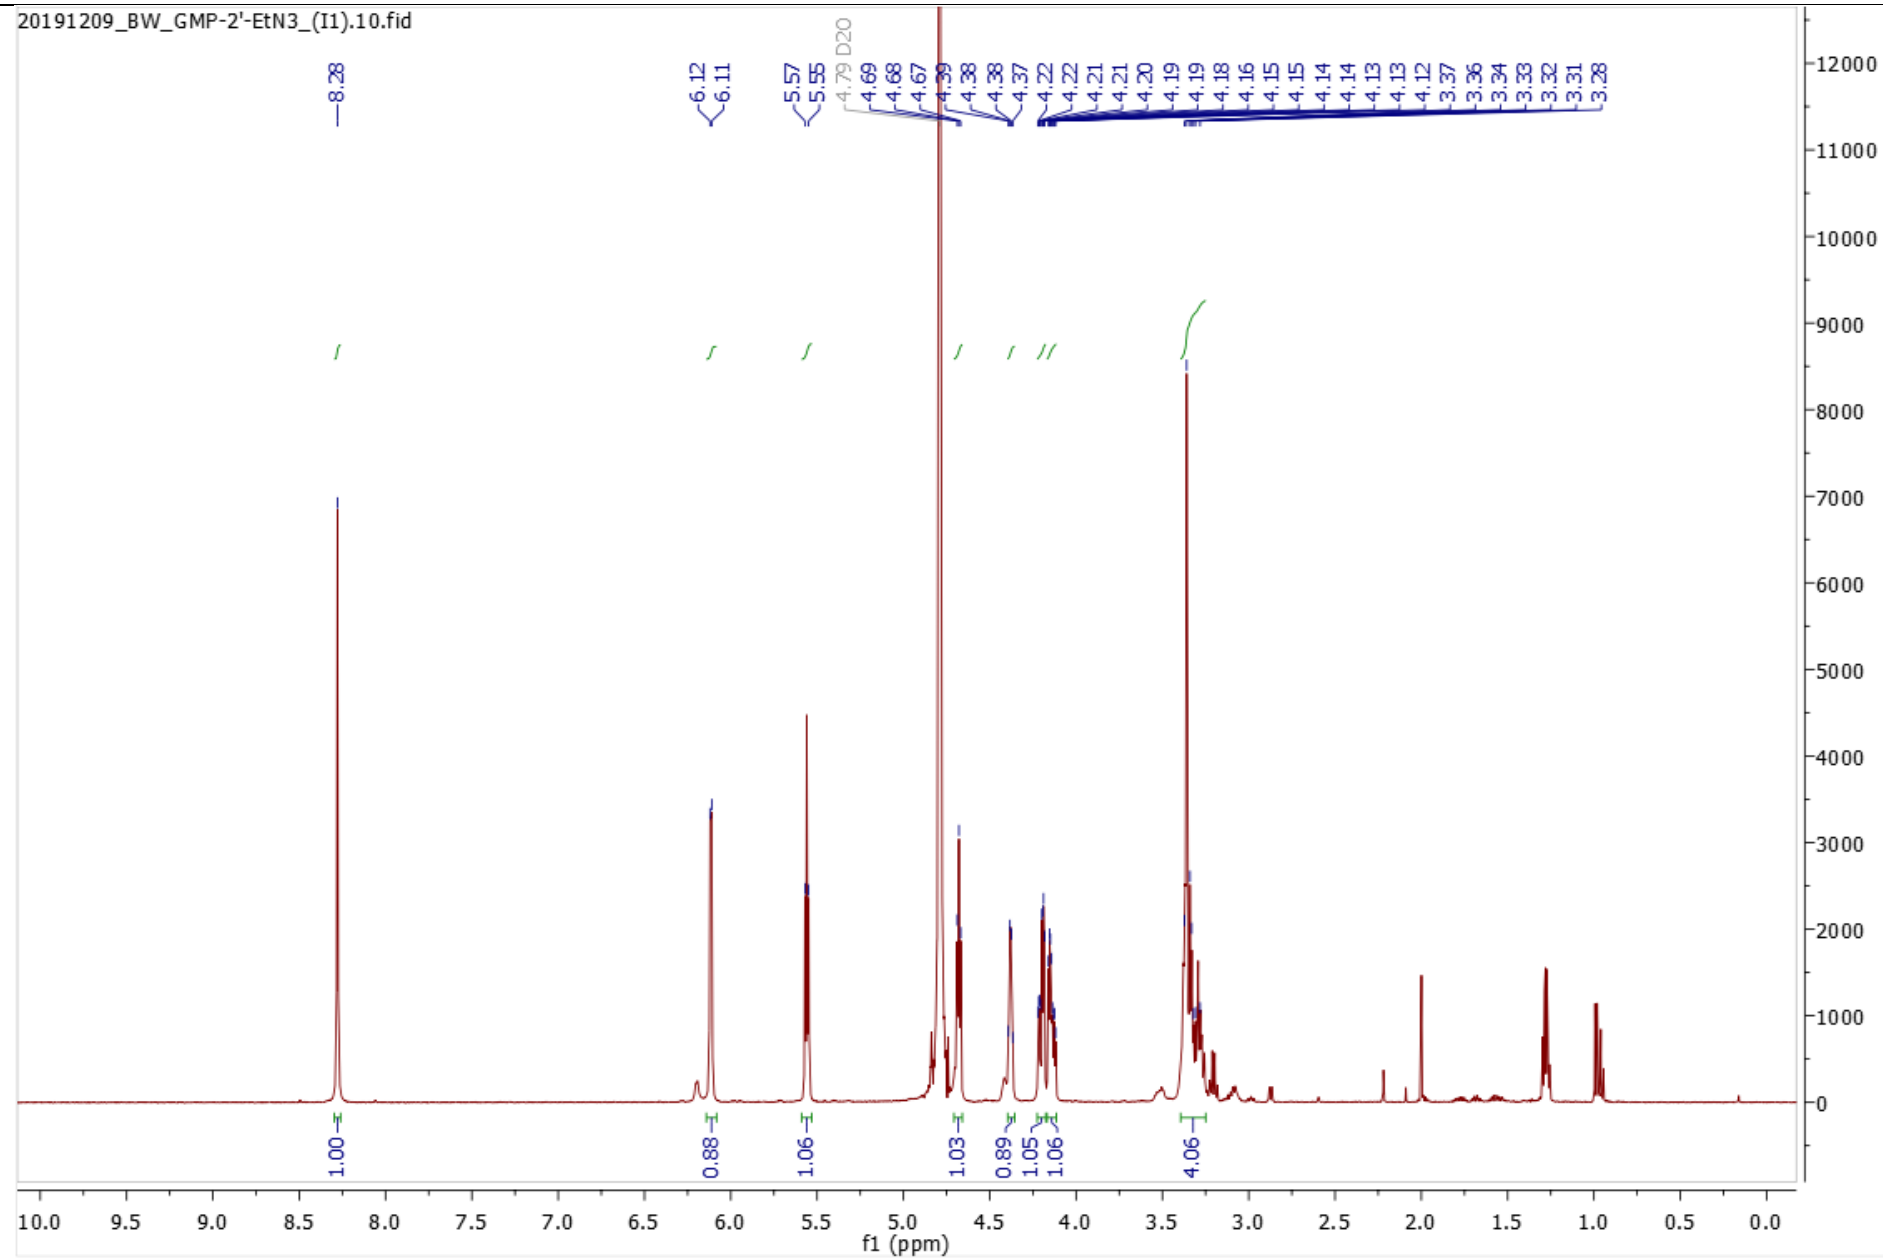

COSY NMR

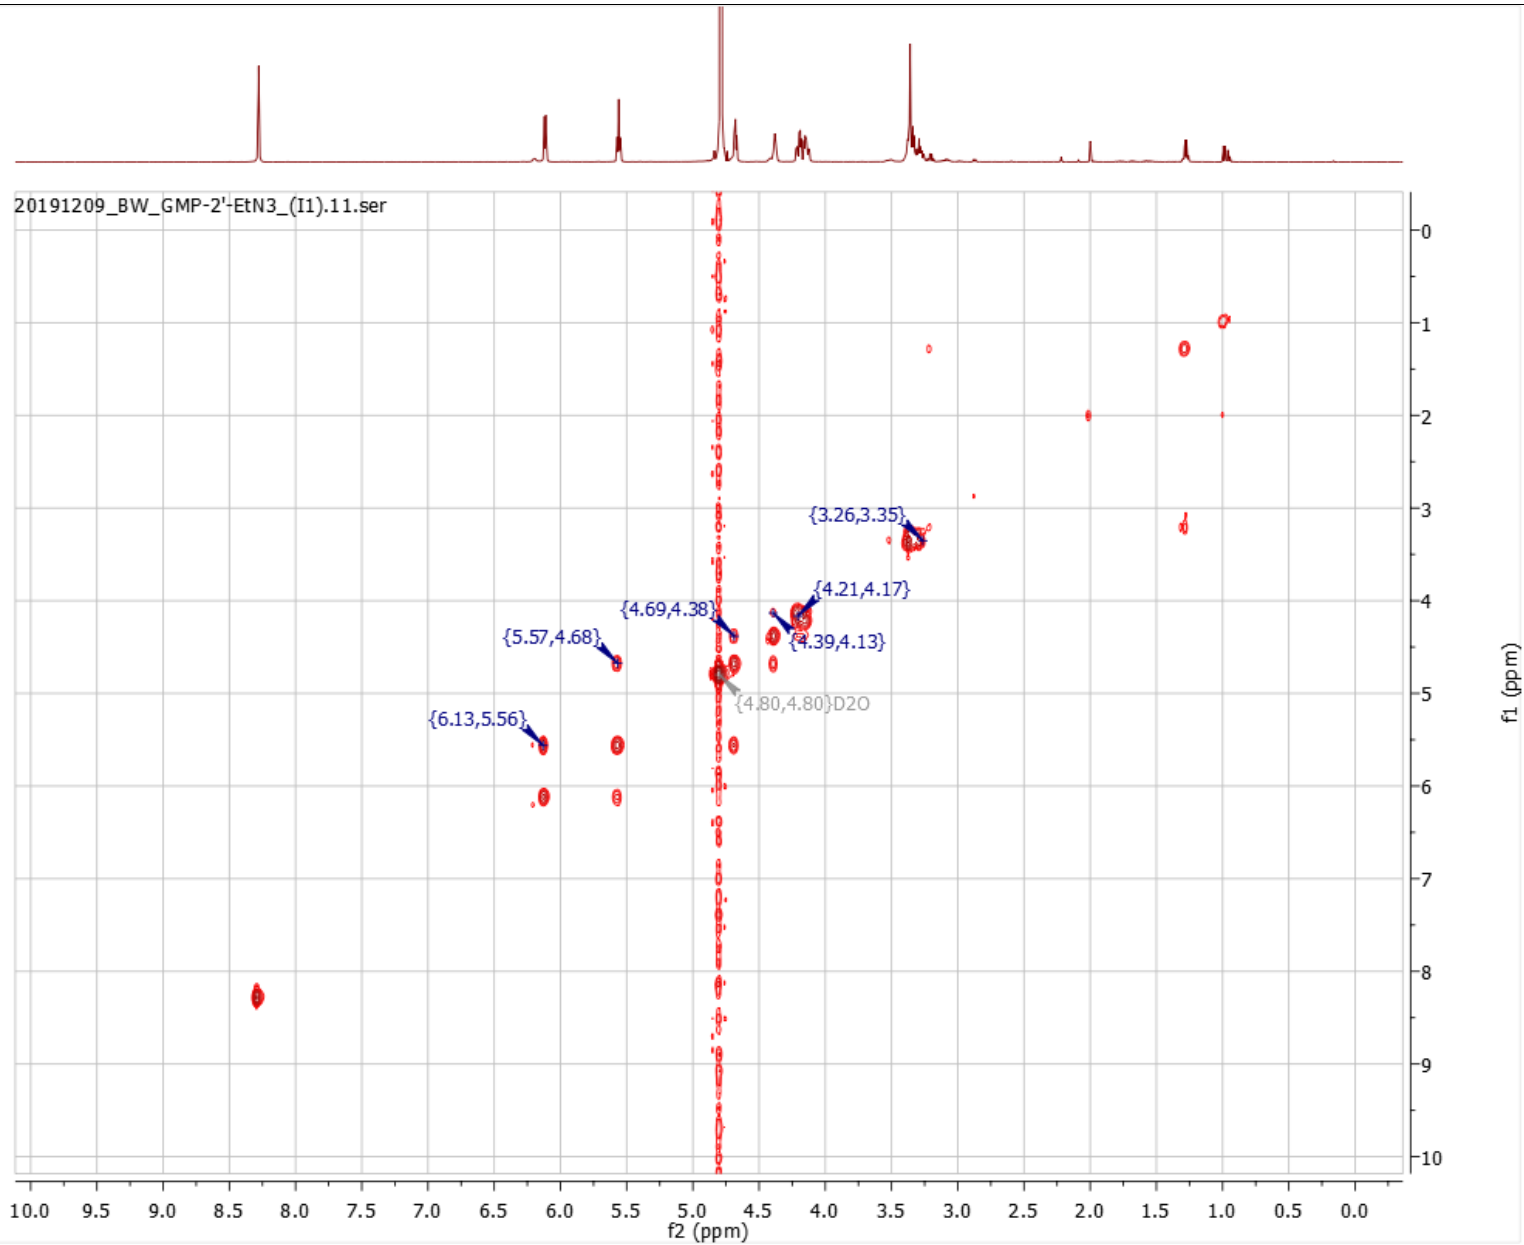

<sup>13</sup>C NMR (500 MHz, D<sub>2</sub>O, 25°C)

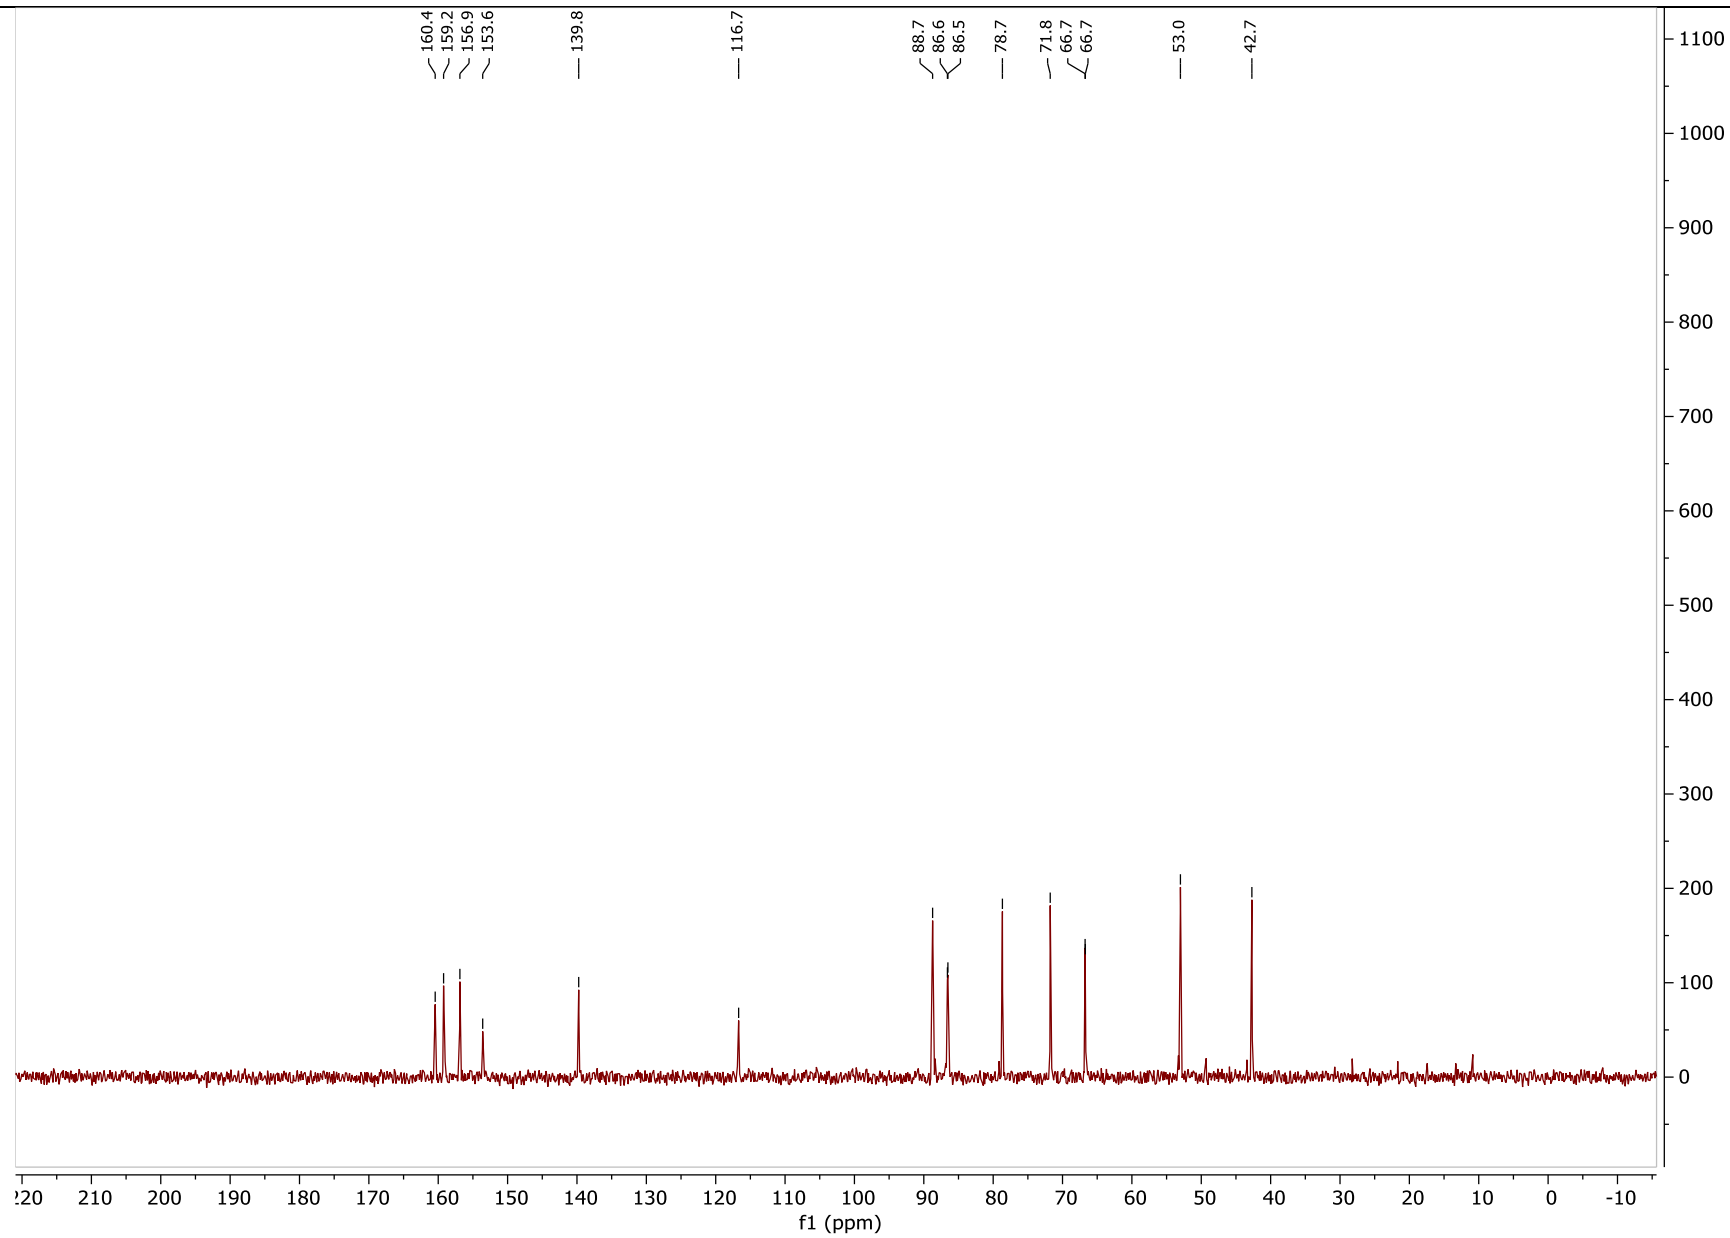

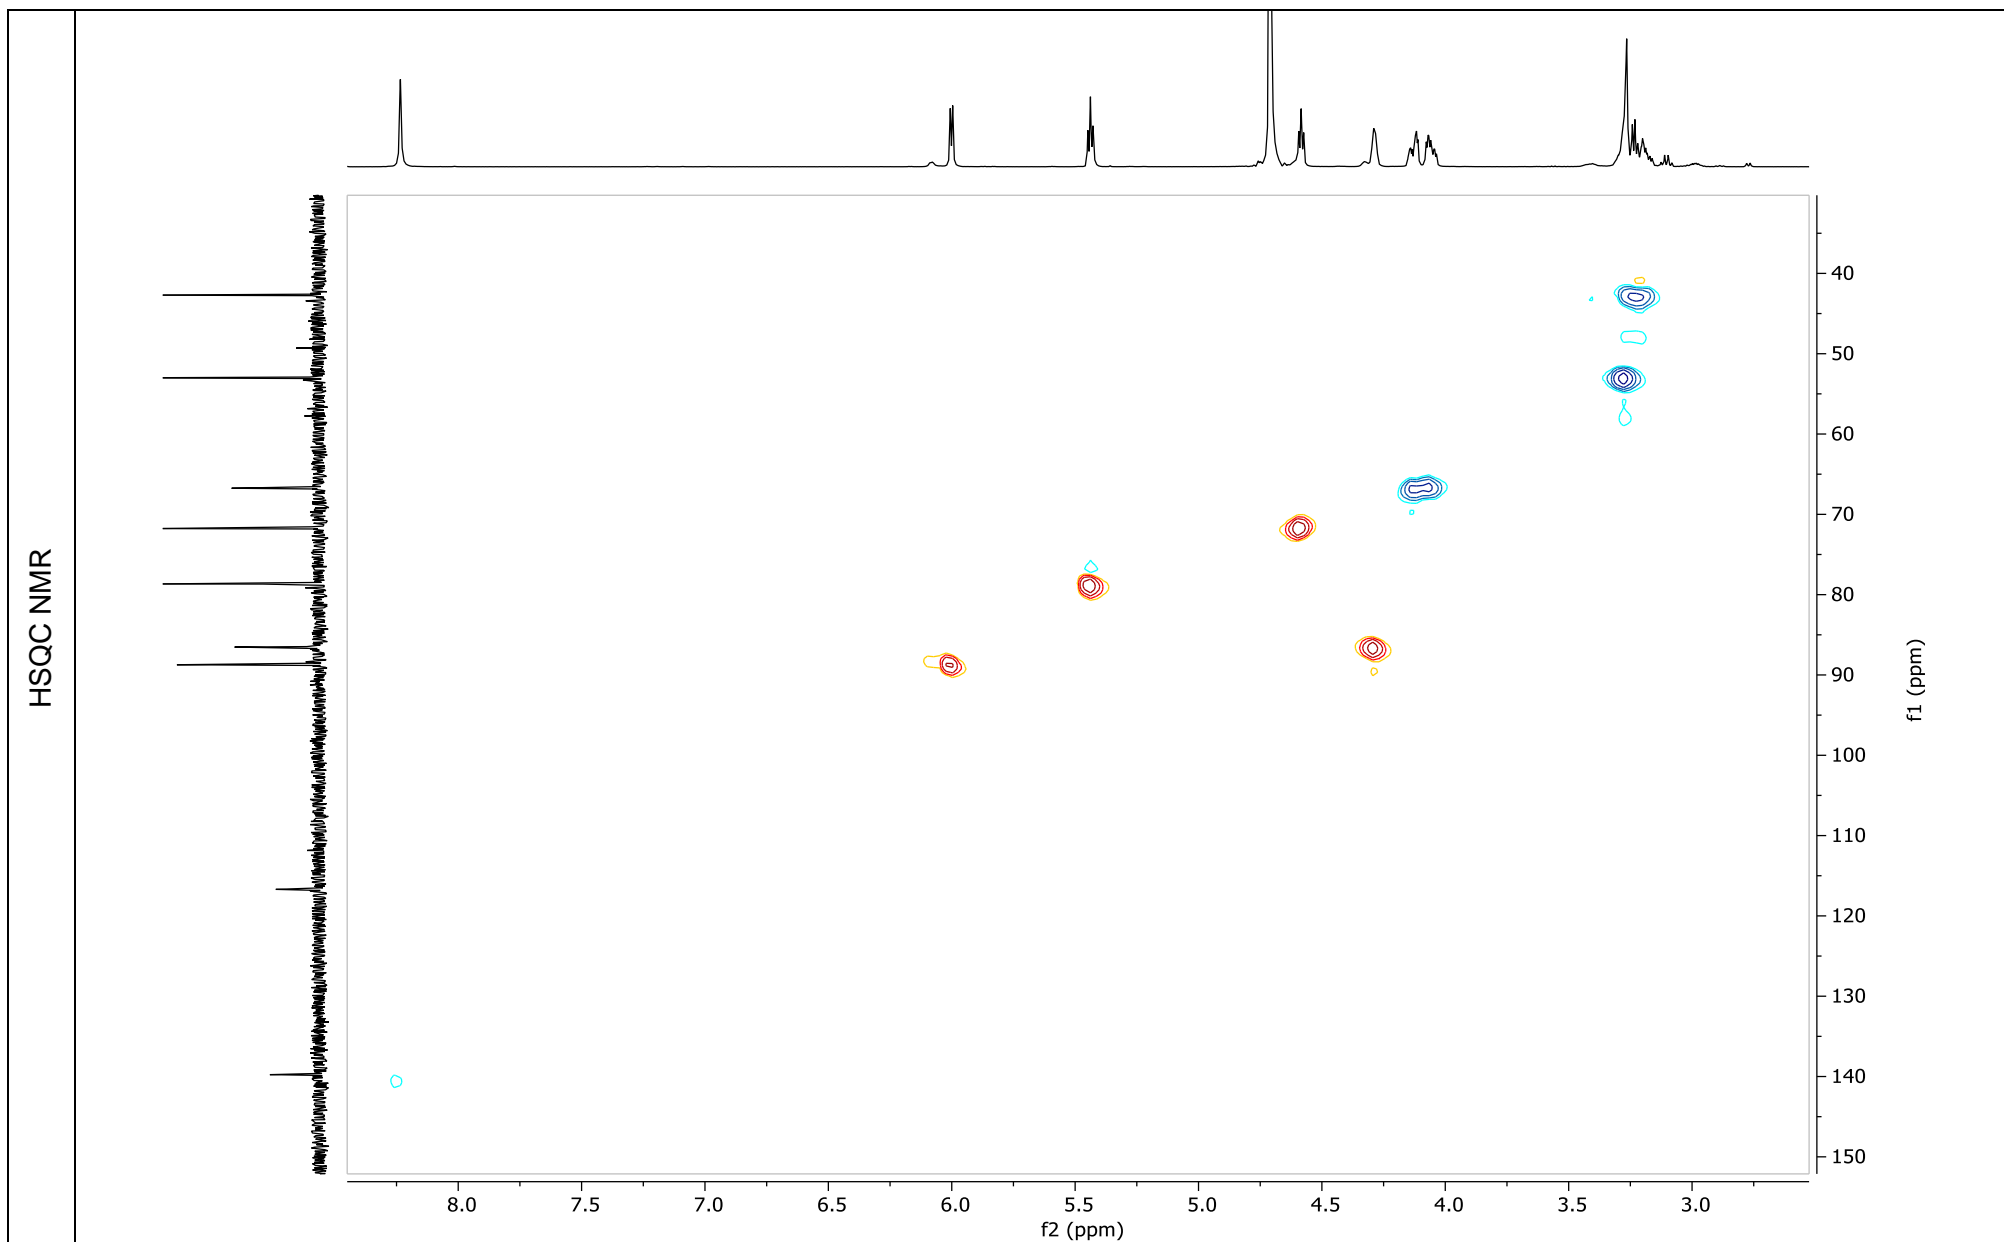

<sup>31</sup>P NMR (203 MHz, D<sub>2</sub>O, H<sub>3</sub>PO<sub>4</sub>, 25°C)

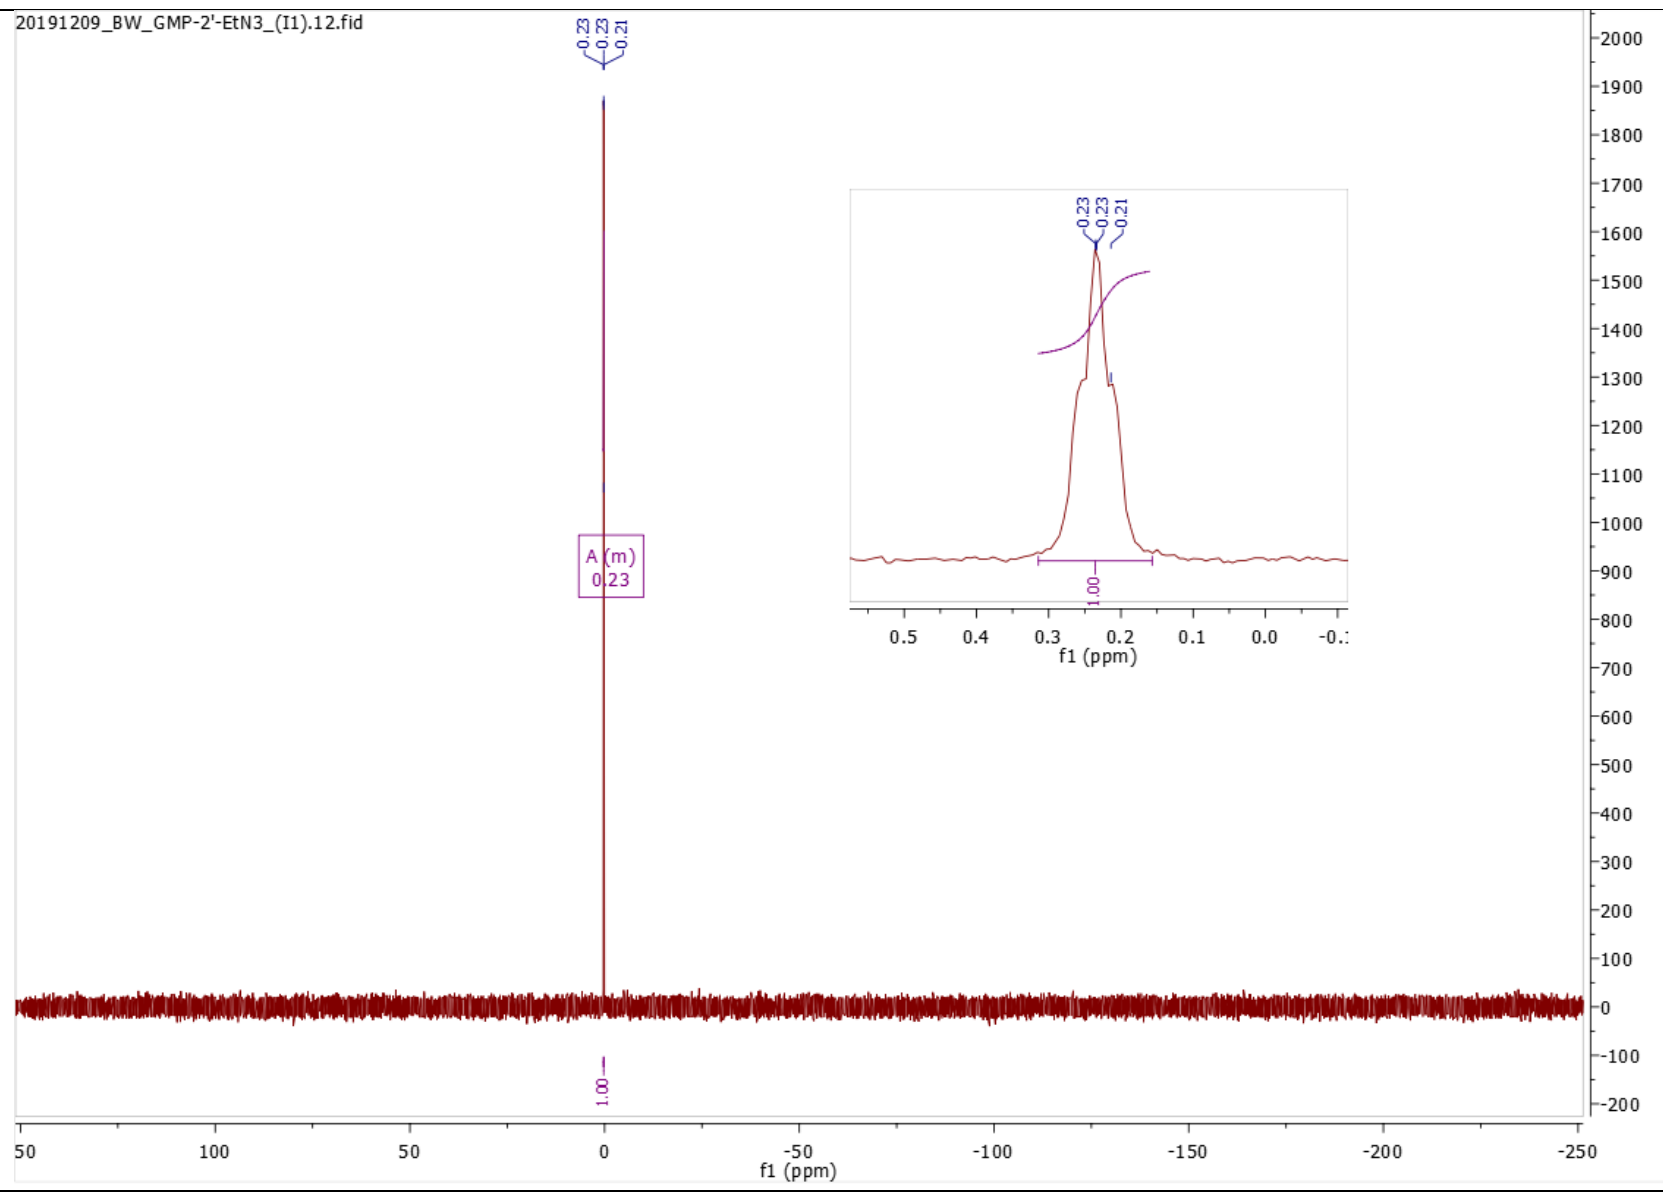

Compound 10-3': GMP-3'-O-C(O)-NH-CH<sub>2</sub>CH<sub>2</sub>-N<sub>3</sub> (NH<sub>4</sub><sup>+</sup> salt)

Chemical structure

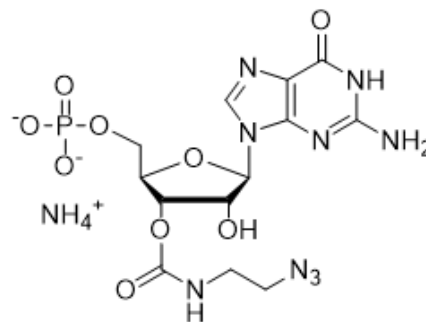

RP-HPLC (conditions c)

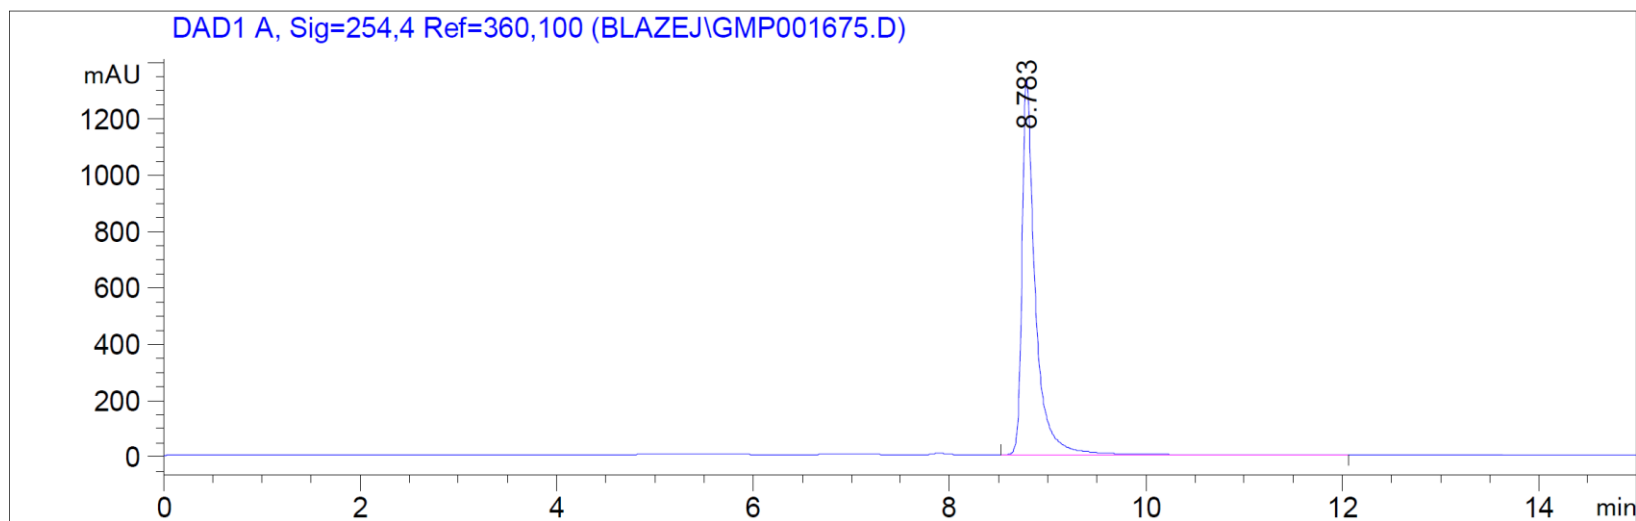



220329\_PSu\_01 #15-86 RT: 0.13-0.75 AV: 72 NL: 3.19E7  
T: FTMS - p ESI Full ms [160.0000-2000.0000]

MS (-) ESI (Calc. [M-H]<sup>-</sup> C<sub>13</sub>H<sub>17</sub>N<sub>9</sub>O<sub>9</sub>P<sup>-</sup> : 474.0892, found: 474.08977)

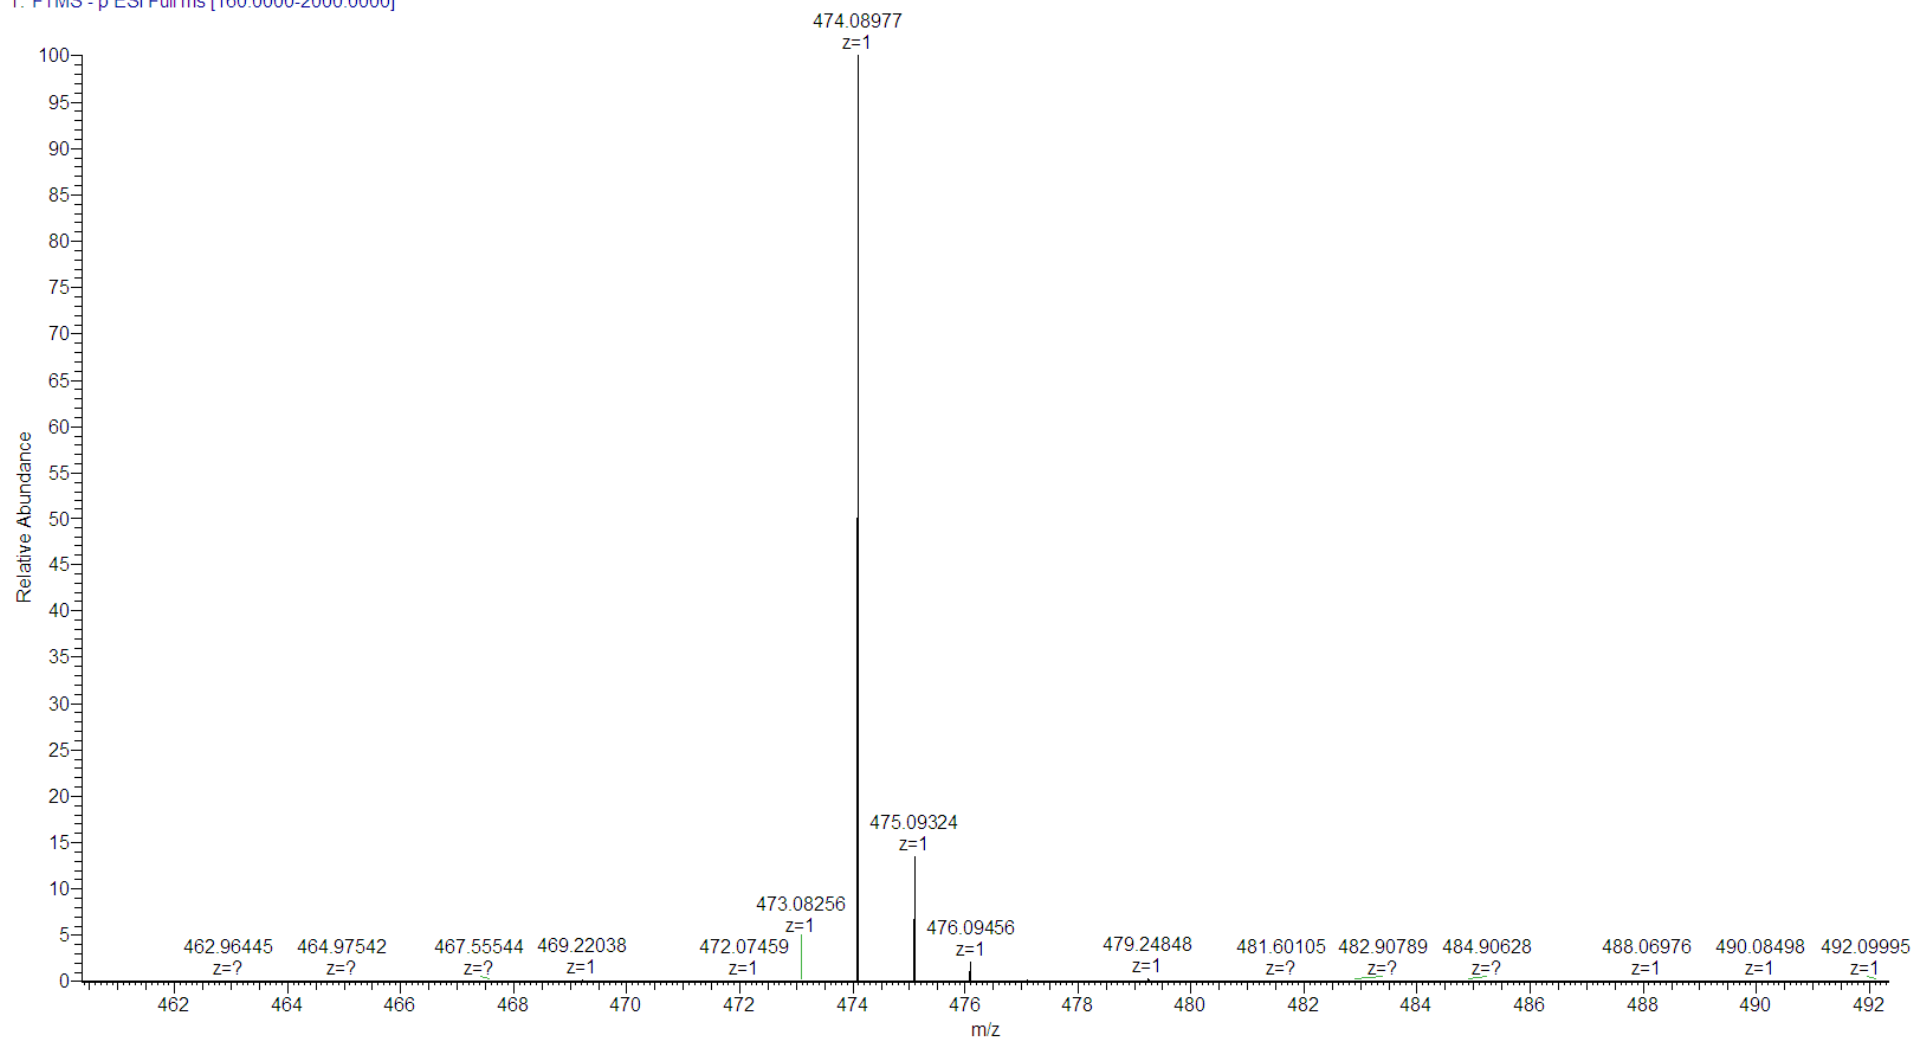

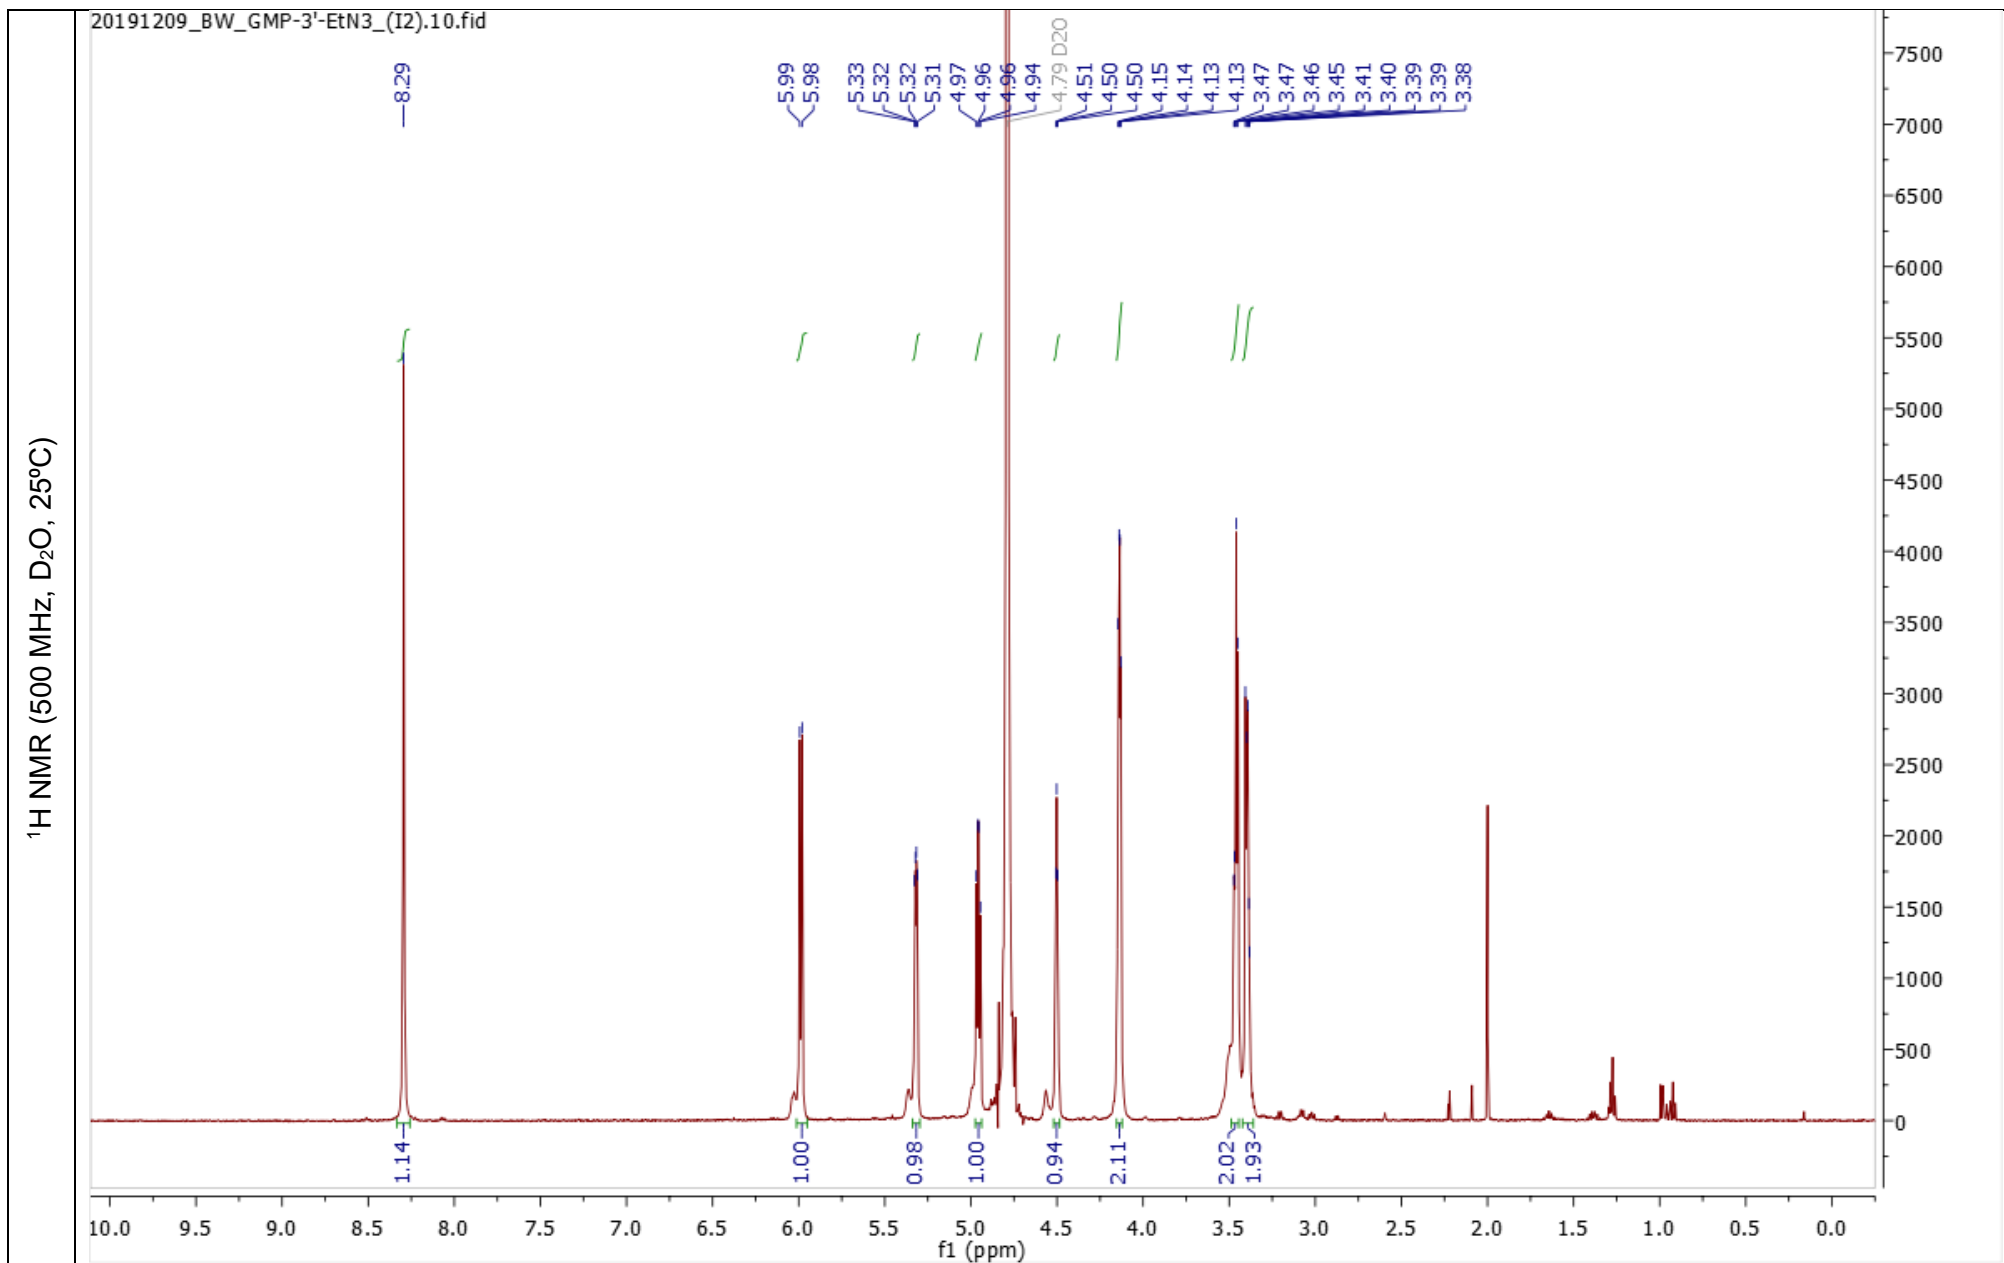

COSY NMR

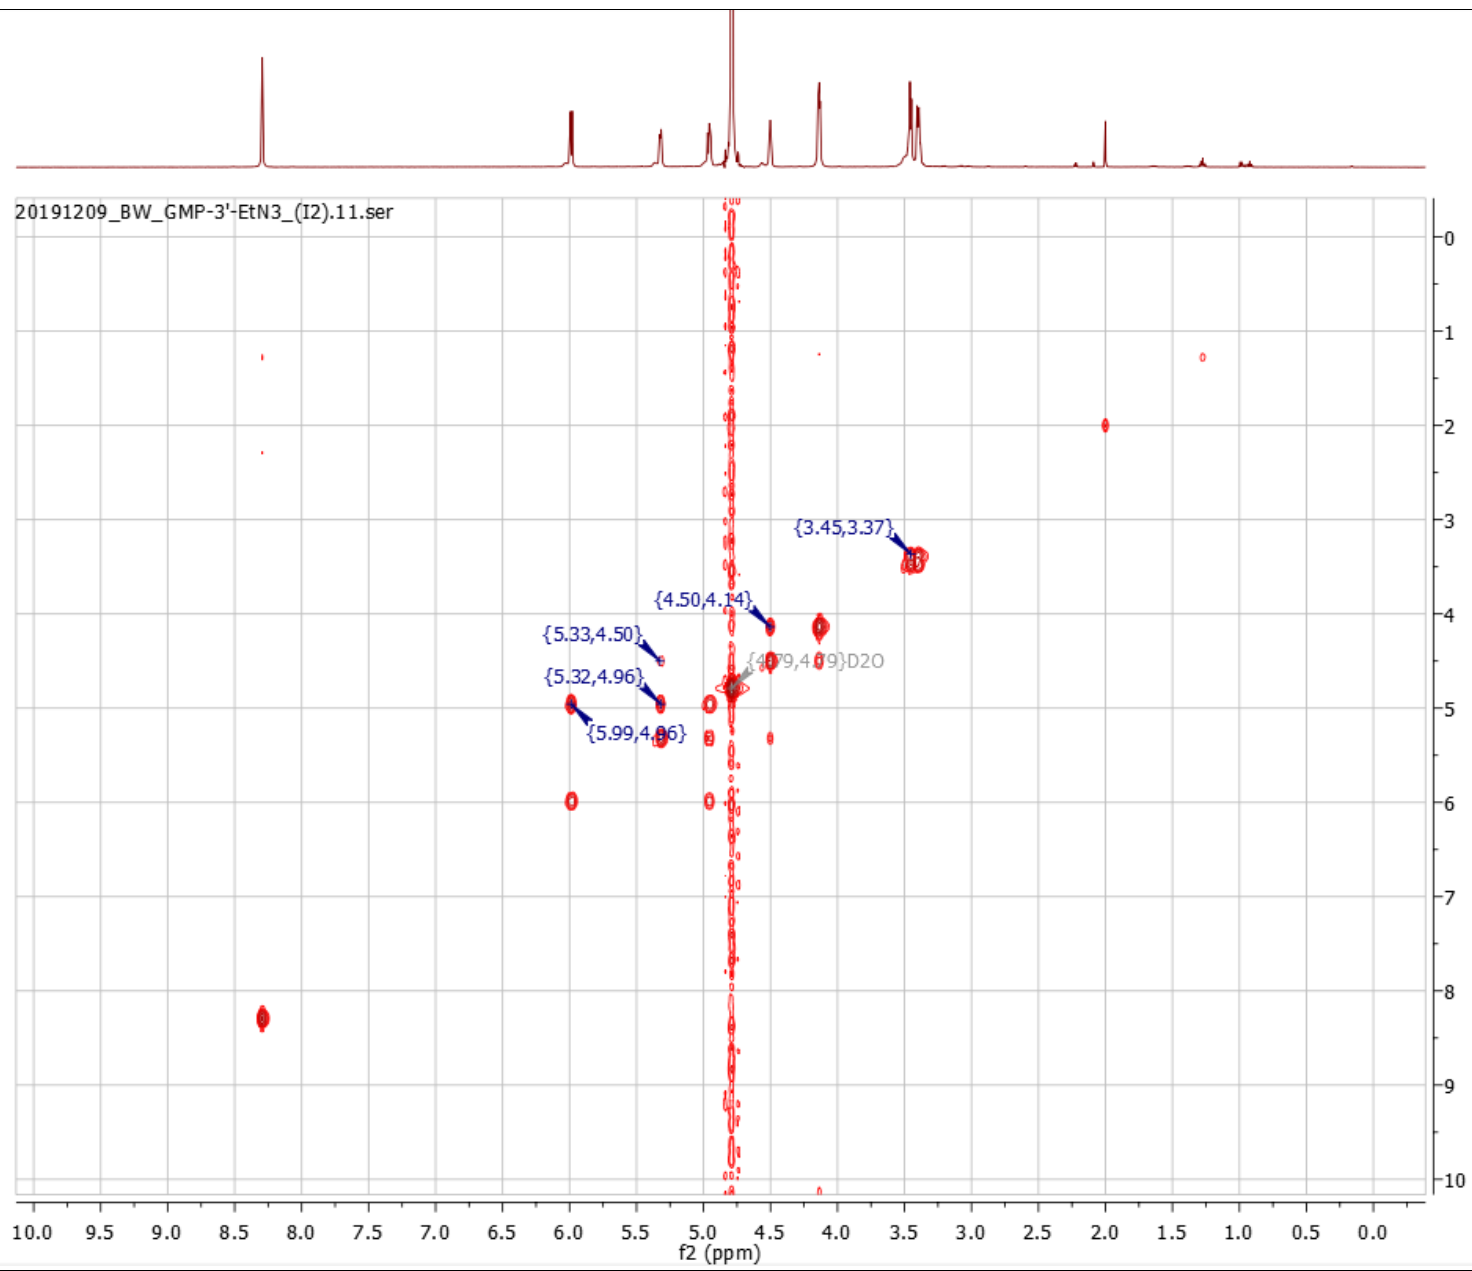

<sup>13</sup>C NMR (500 MHz, D<sub>2</sub>O, 25°C)

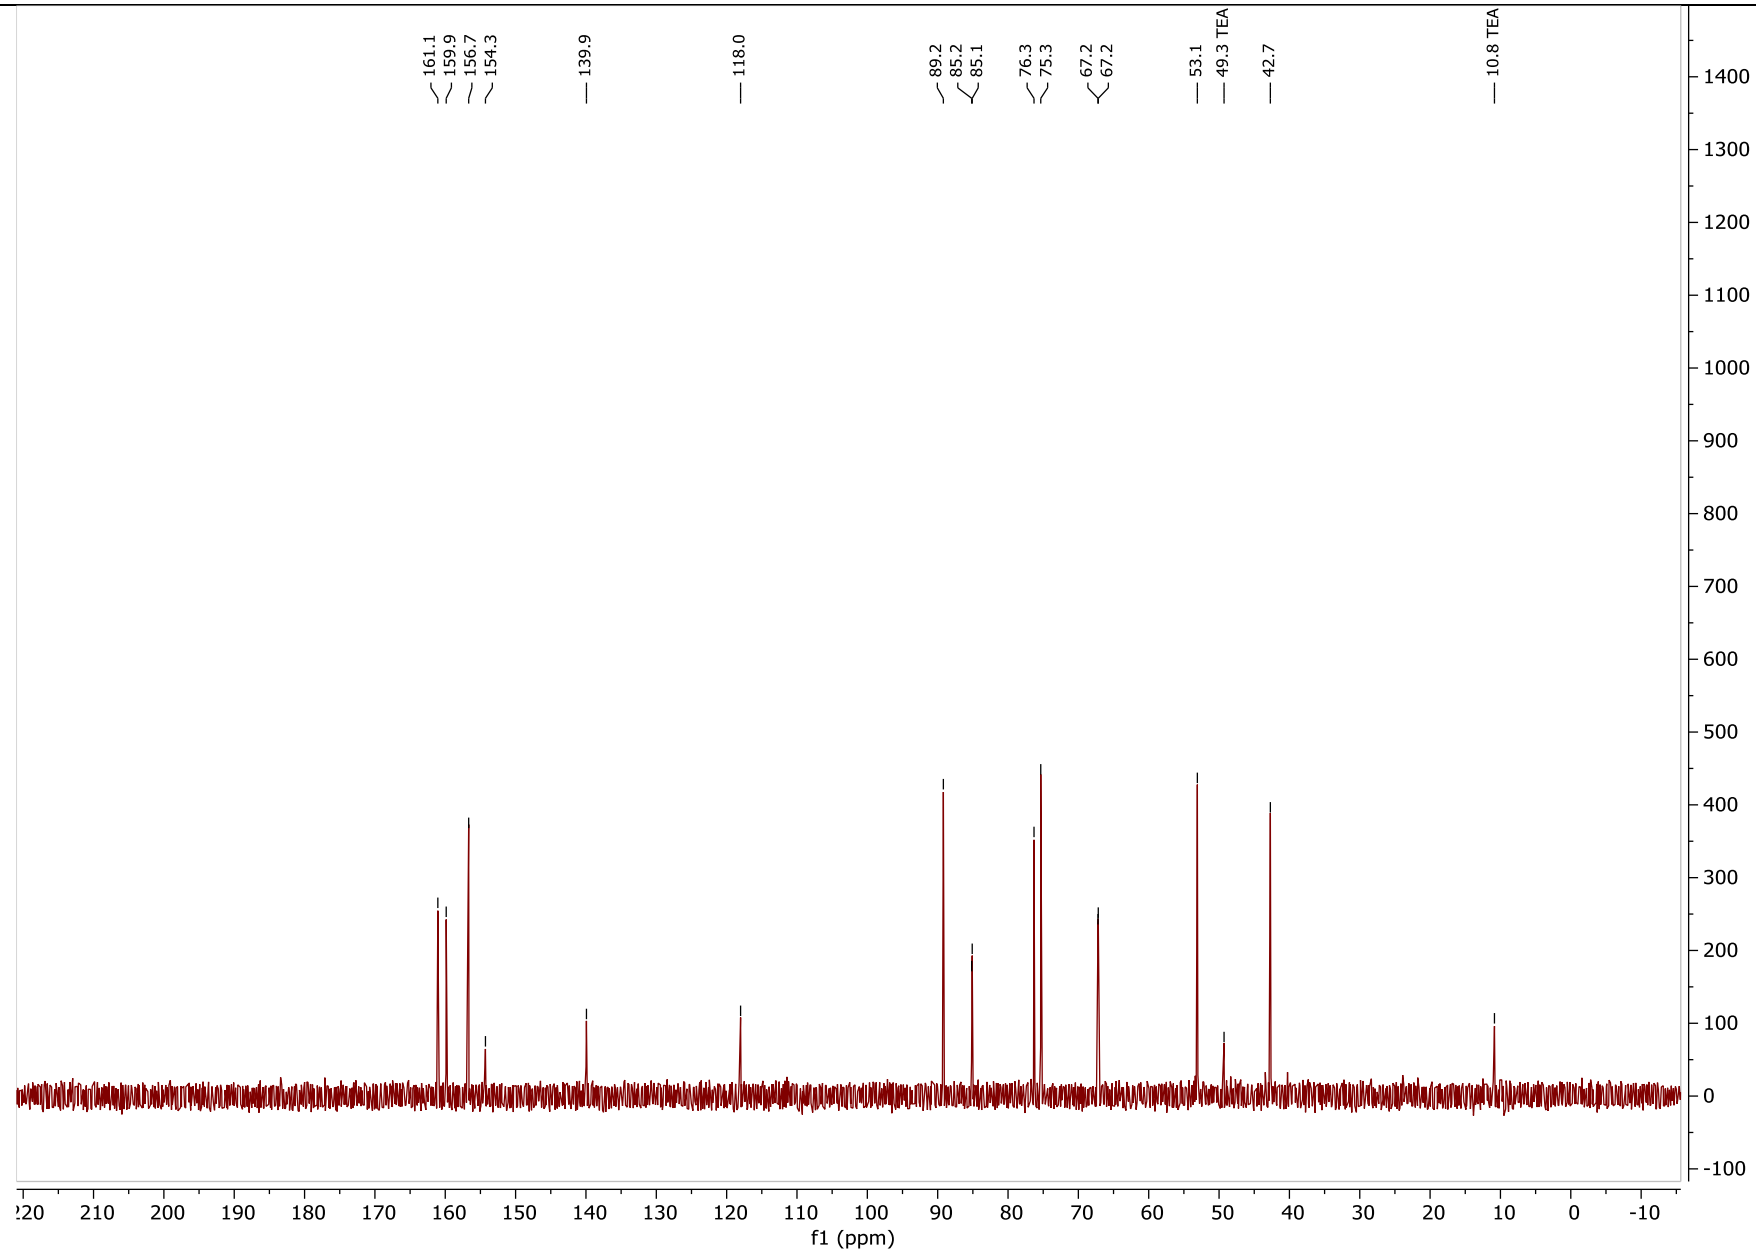

HSQC NMR

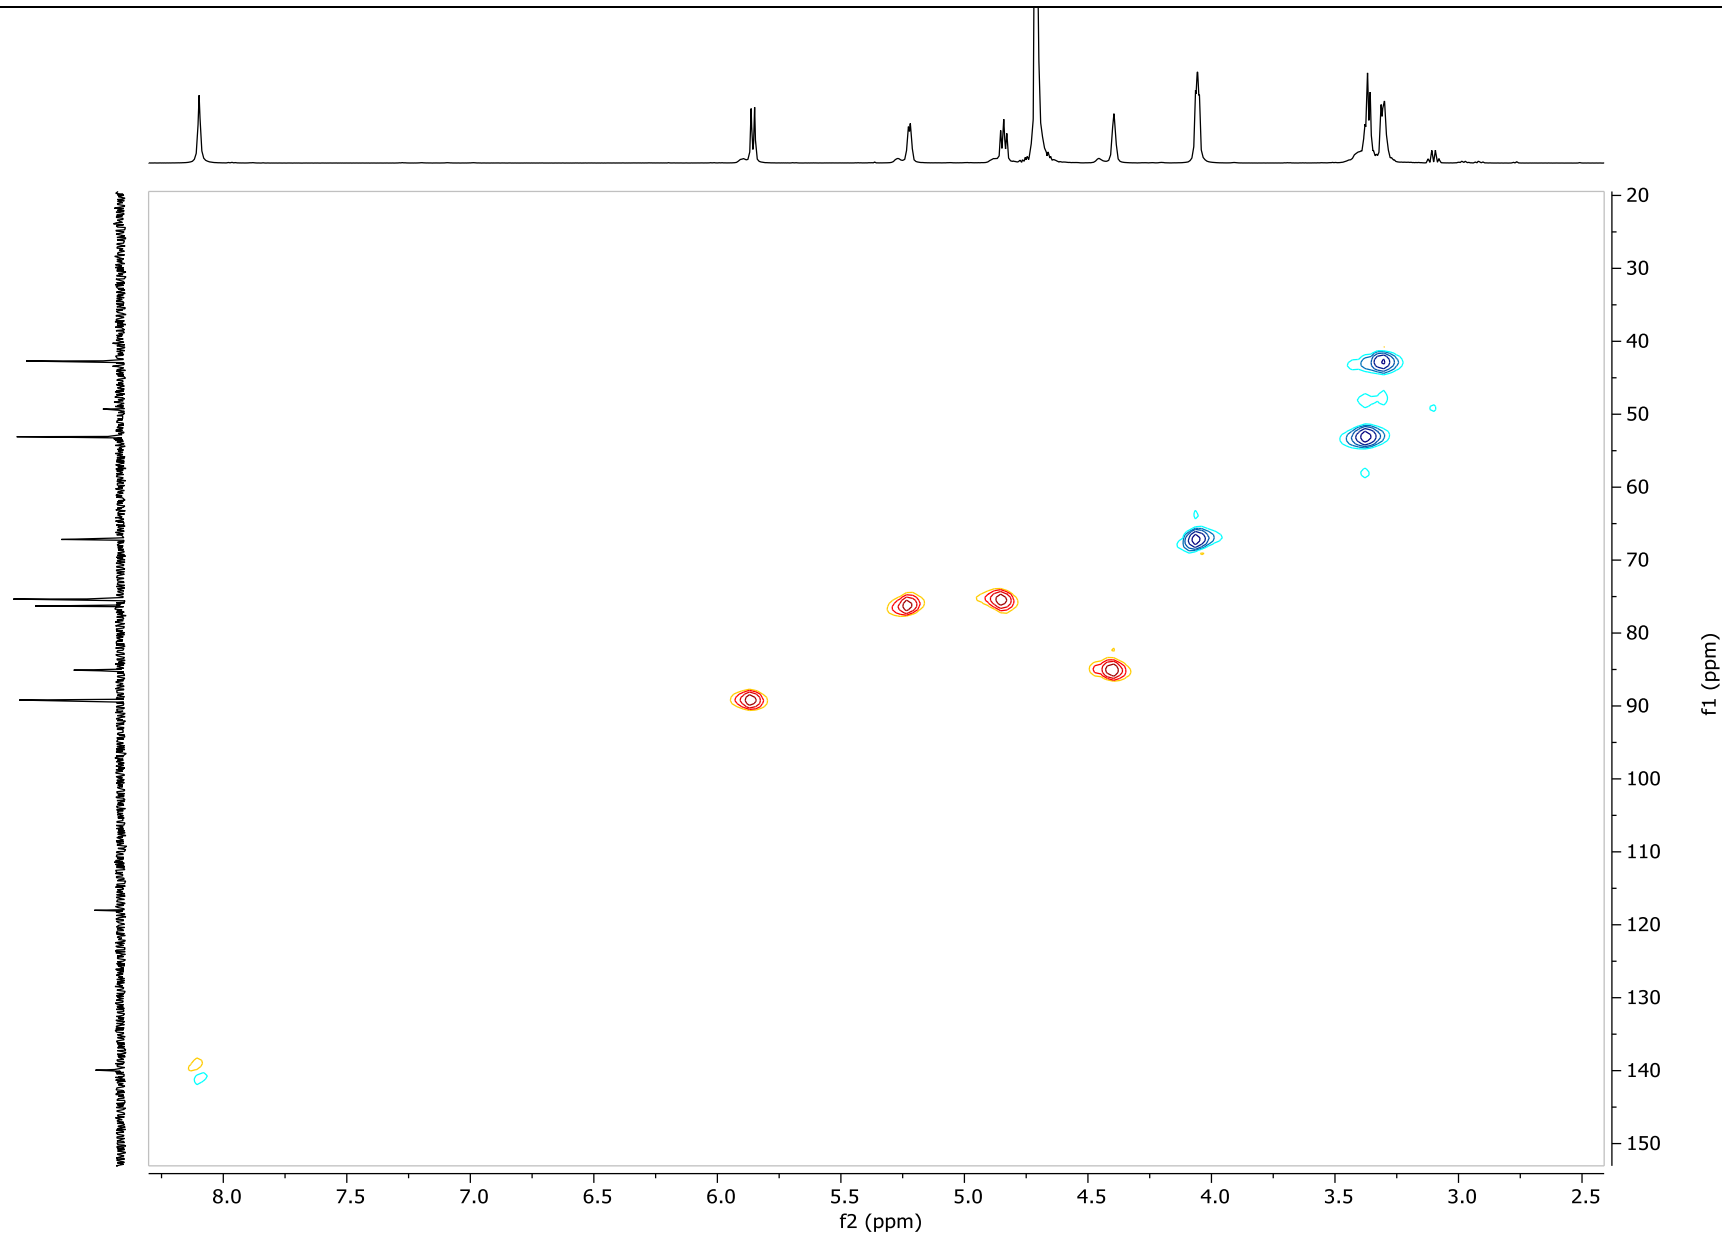

$^{31}\text{P}$  NMR (203 MHz,  $\text{D}_2\text{O}$ ,  $\text{H}_3\text{PO}_4$ , 25°C)

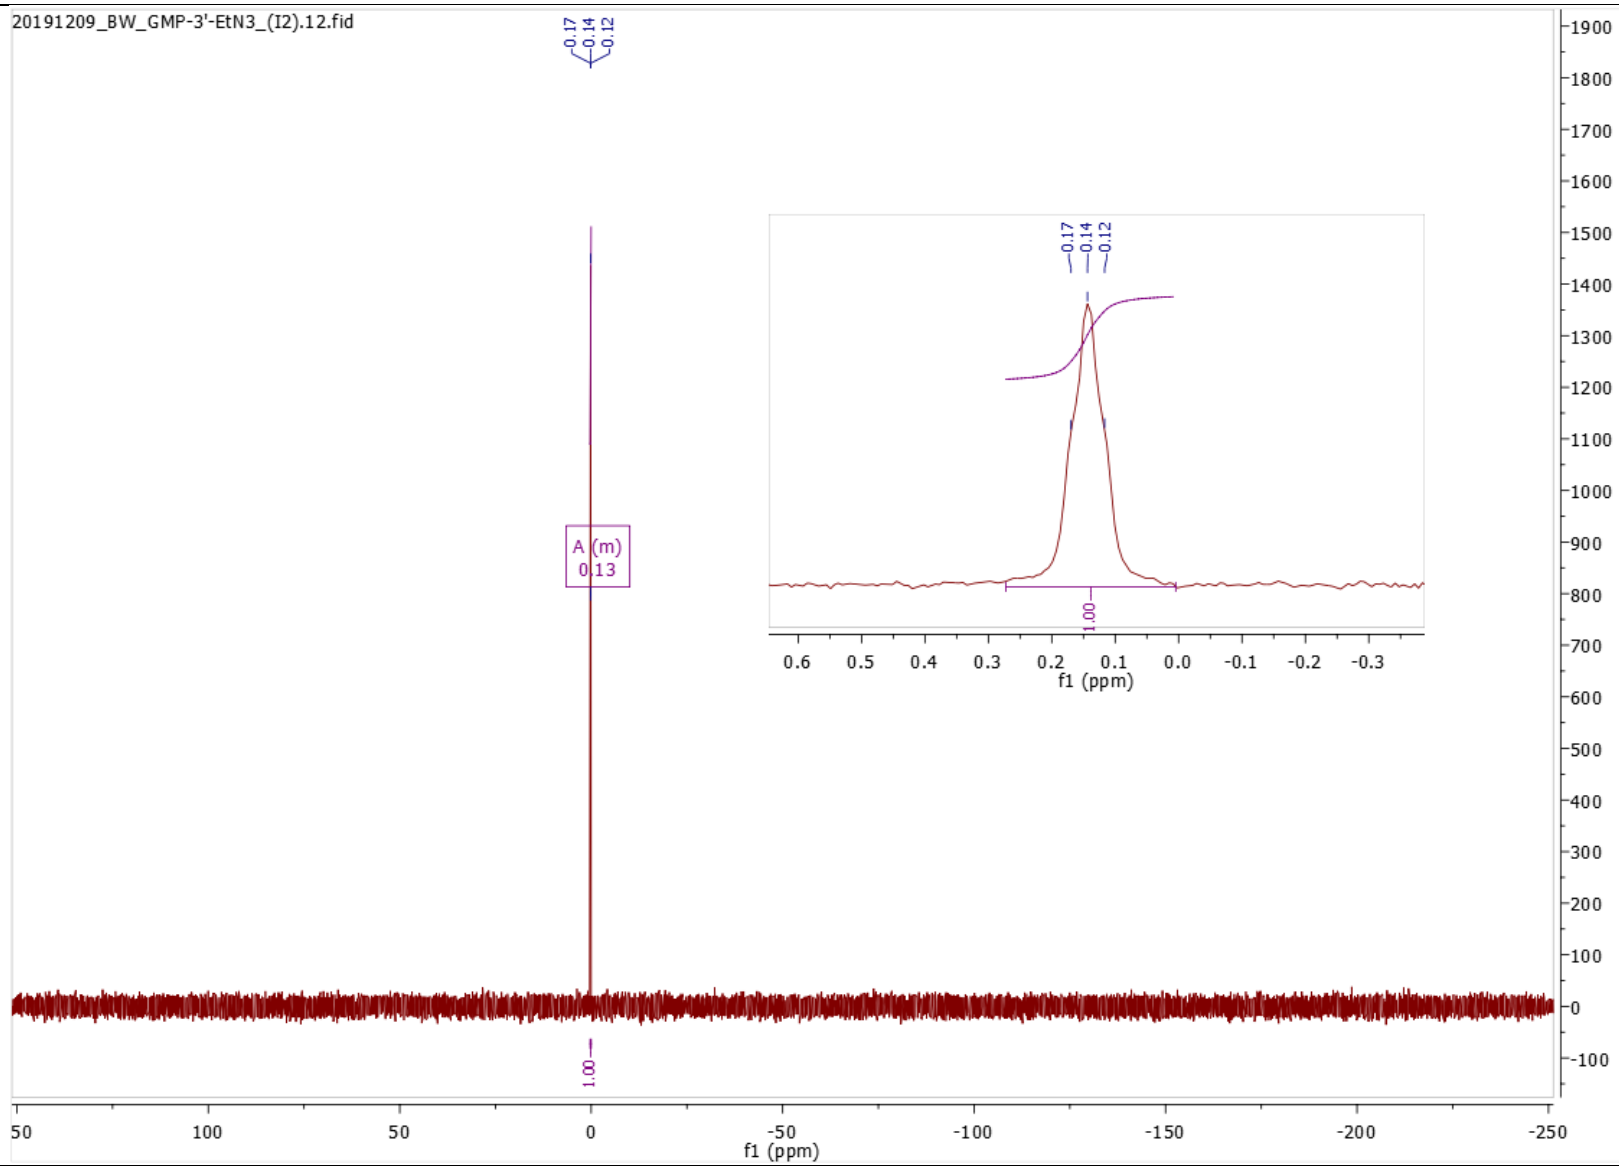

Compound 11-2': GMP-2'-O-C(O)-NH-C<sub>3</sub>H<sub>3</sub> (NH<sub>4</sub><sup>+</sup> salt)

Chemical structure

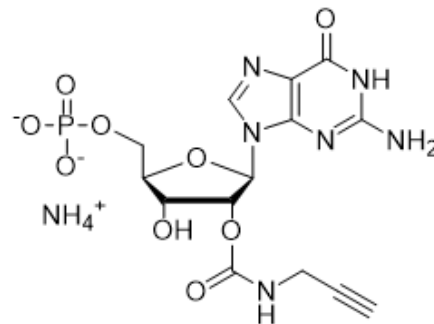

RP-HPLC (conditions c)

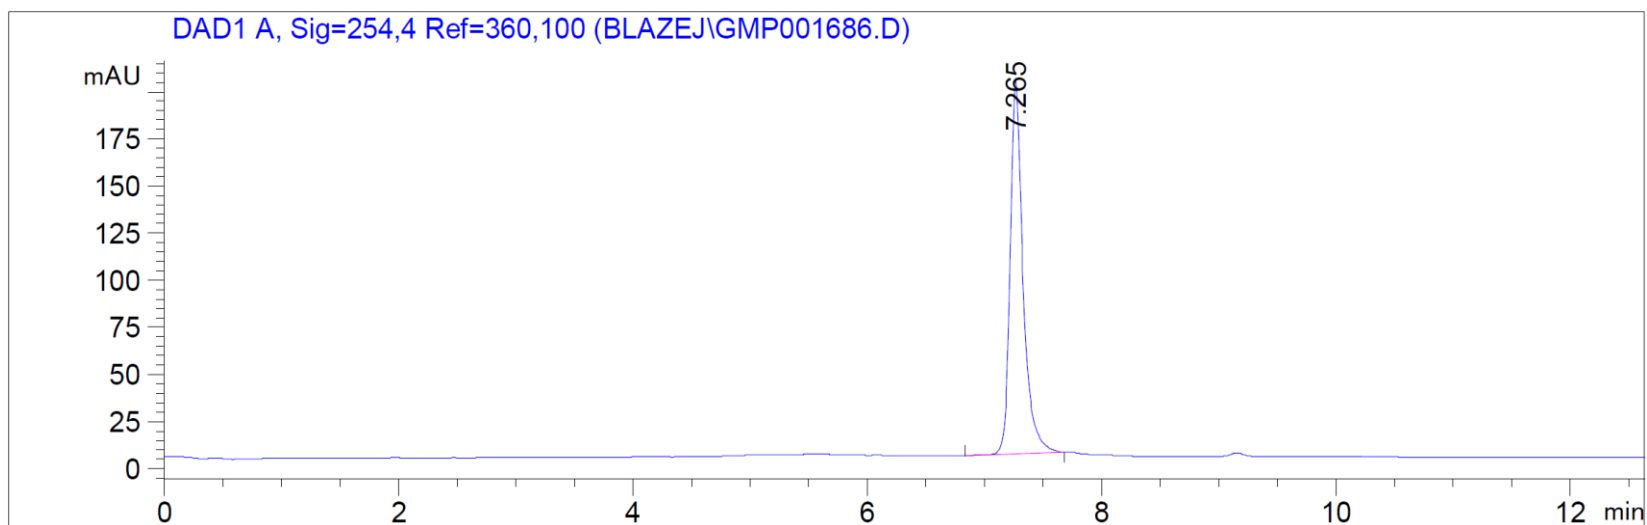

220329\_PSu\_02#19-76 RT: 0.17-0.66 AV: 58 NL: 1.70E7  
T: FTMS - p ESI Full ms [160.0000-2000.0000]

MS (-) ESI (Calc. [M-H]<sup>-</sup> C<sub>14</sub>H<sub>16</sub>N<sub>6</sub>O<sub>9</sub>P<sup>-</sup> : 443.0722, found: 443.07271)

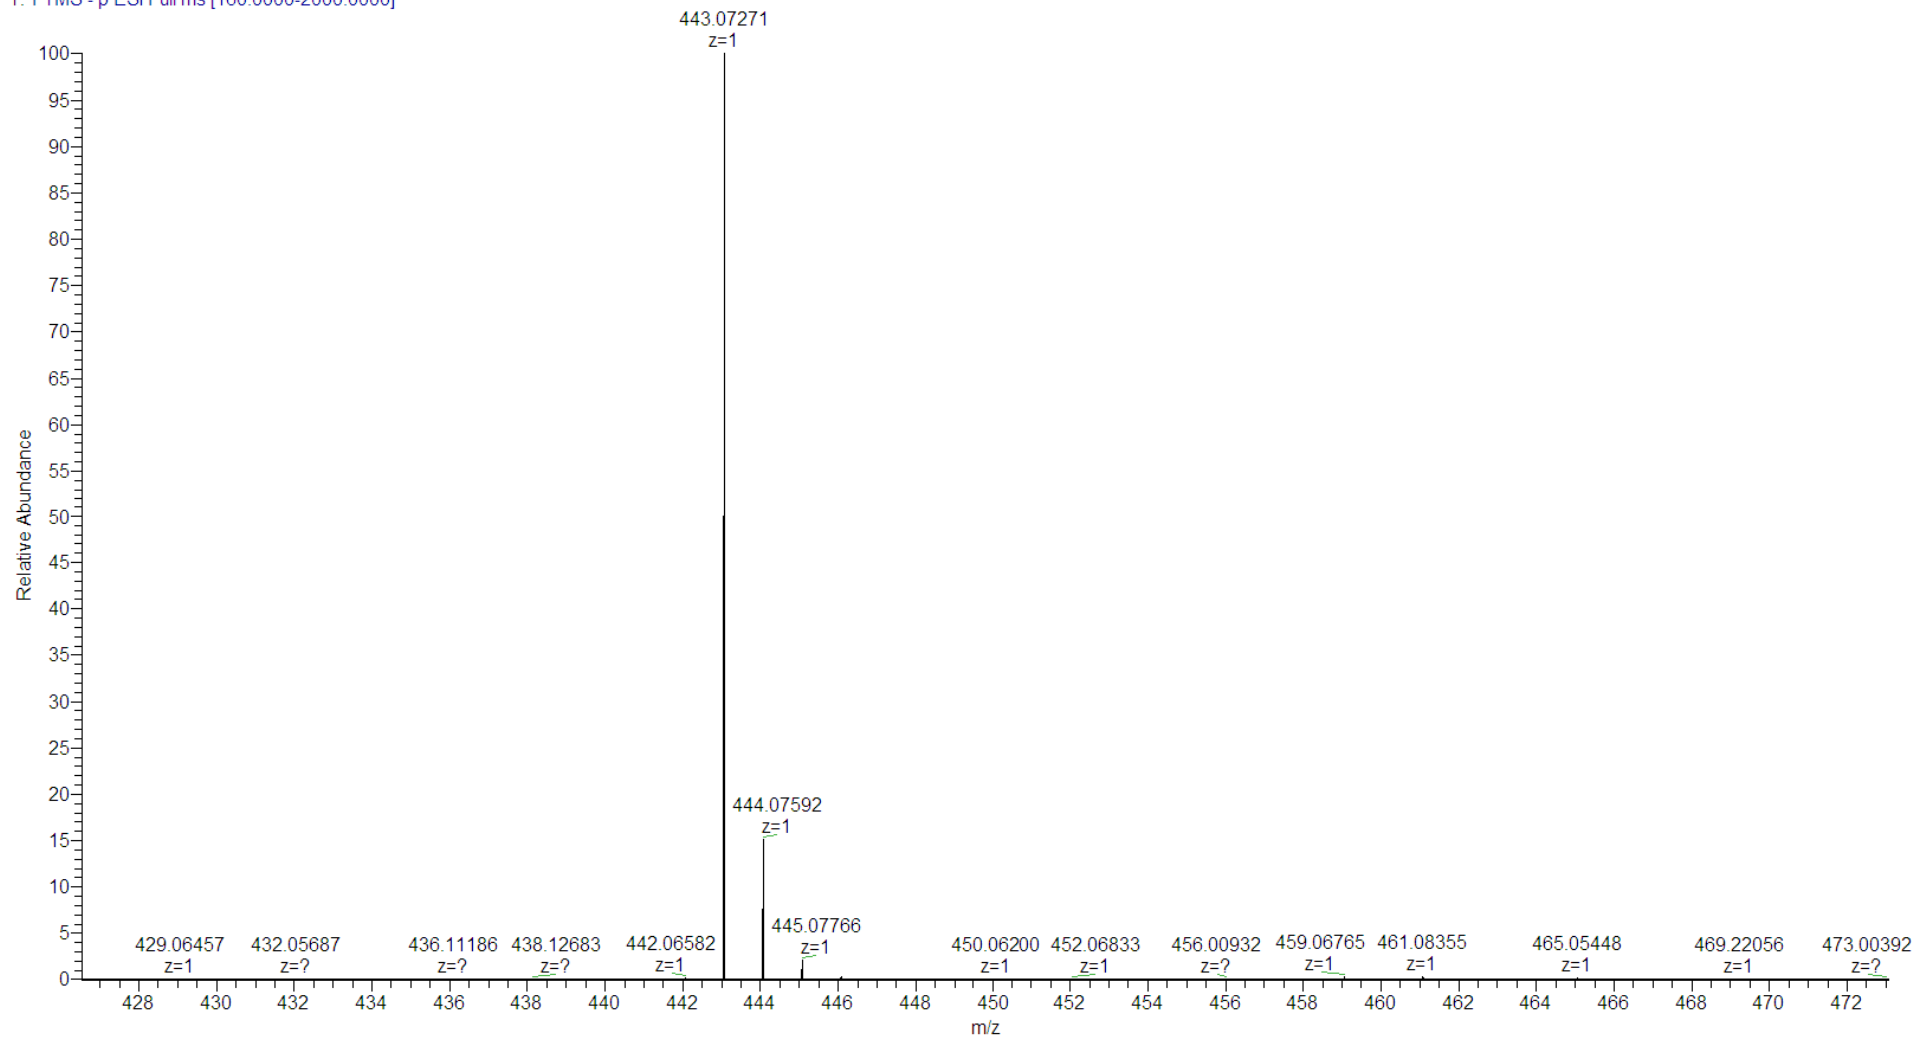



<sup>1</sup>H NMR (500 MHz, D<sub>2</sub>O, 25°C)

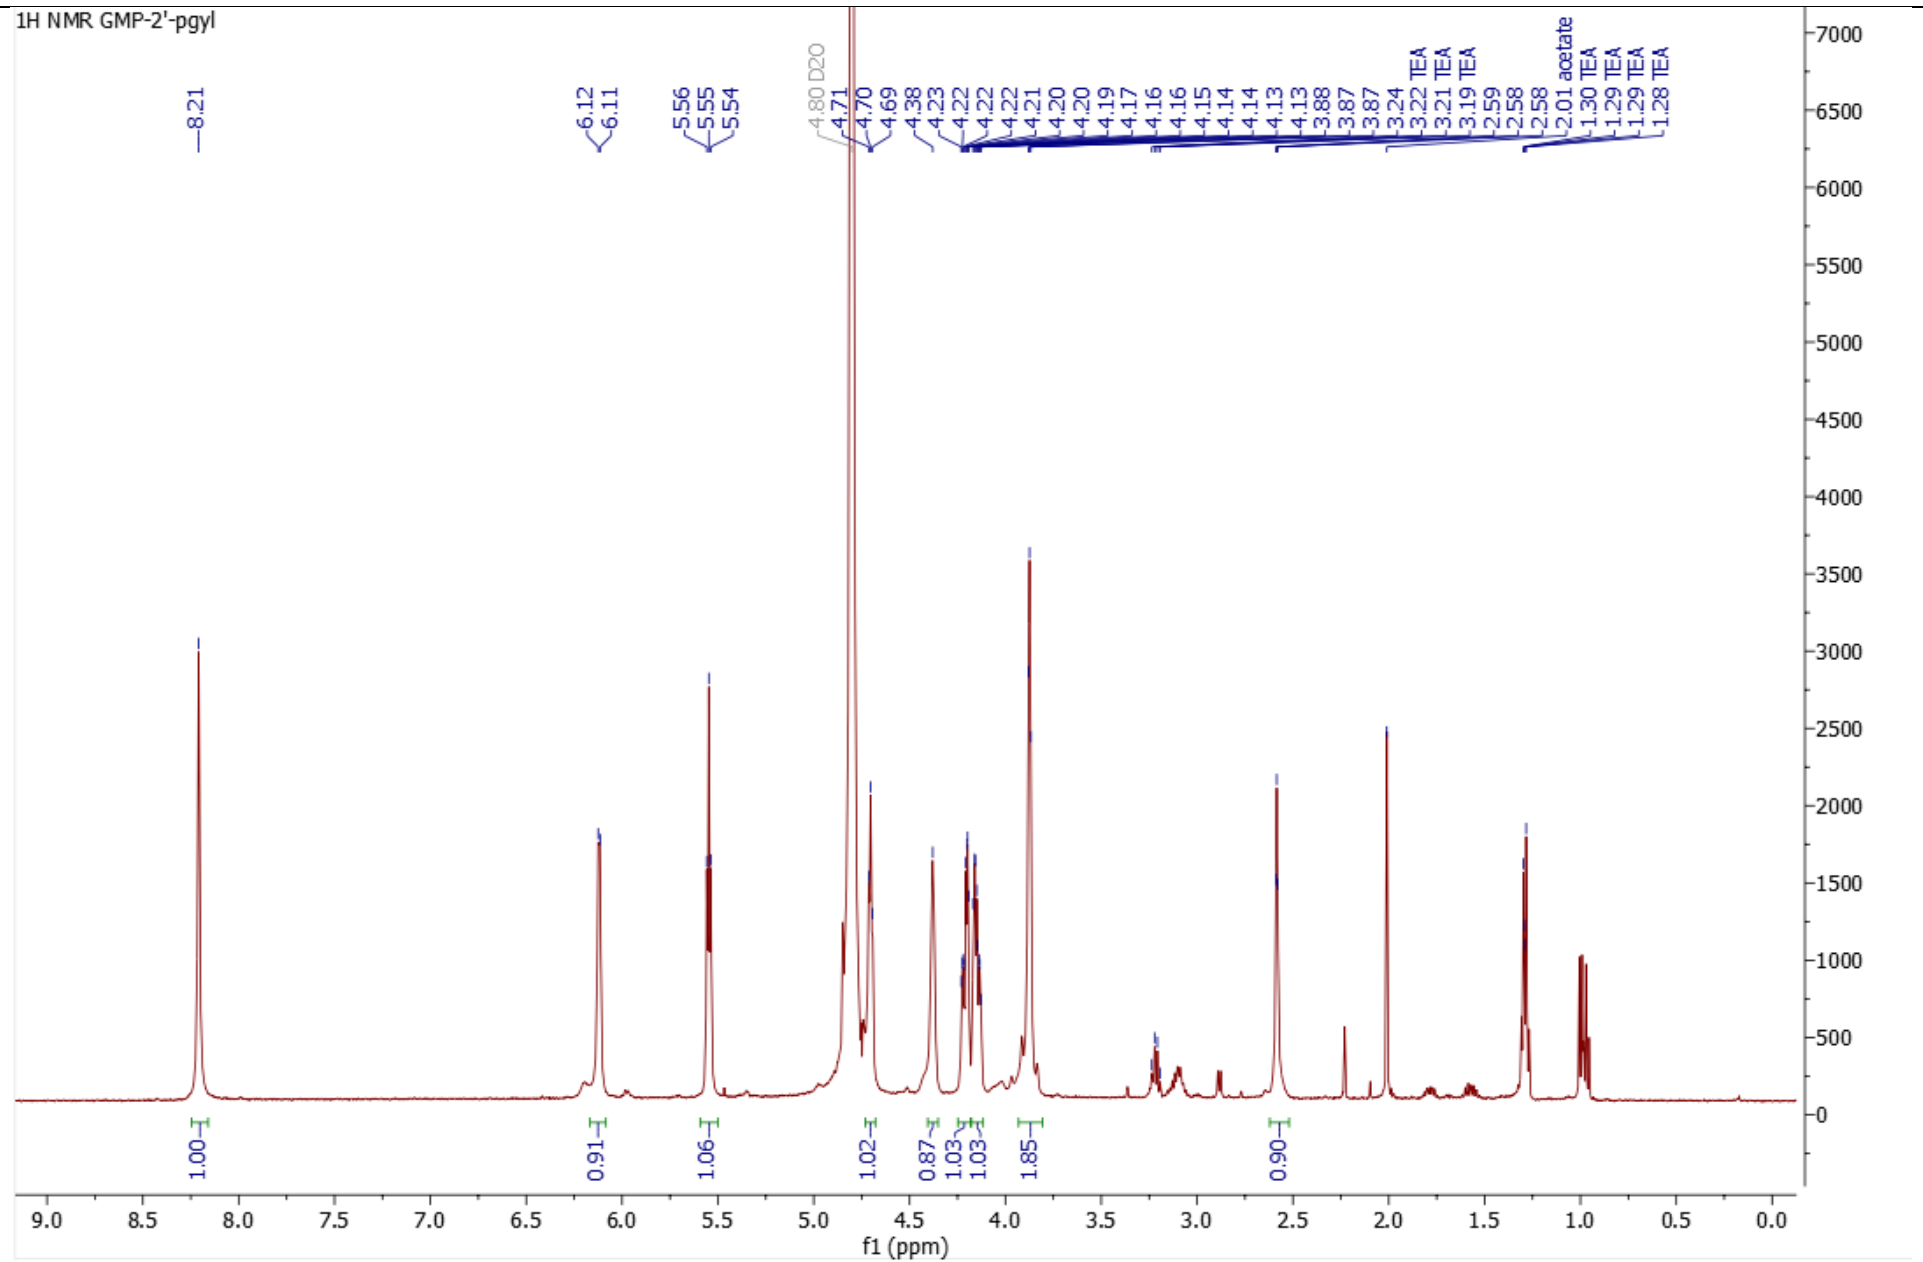

COSY NMR

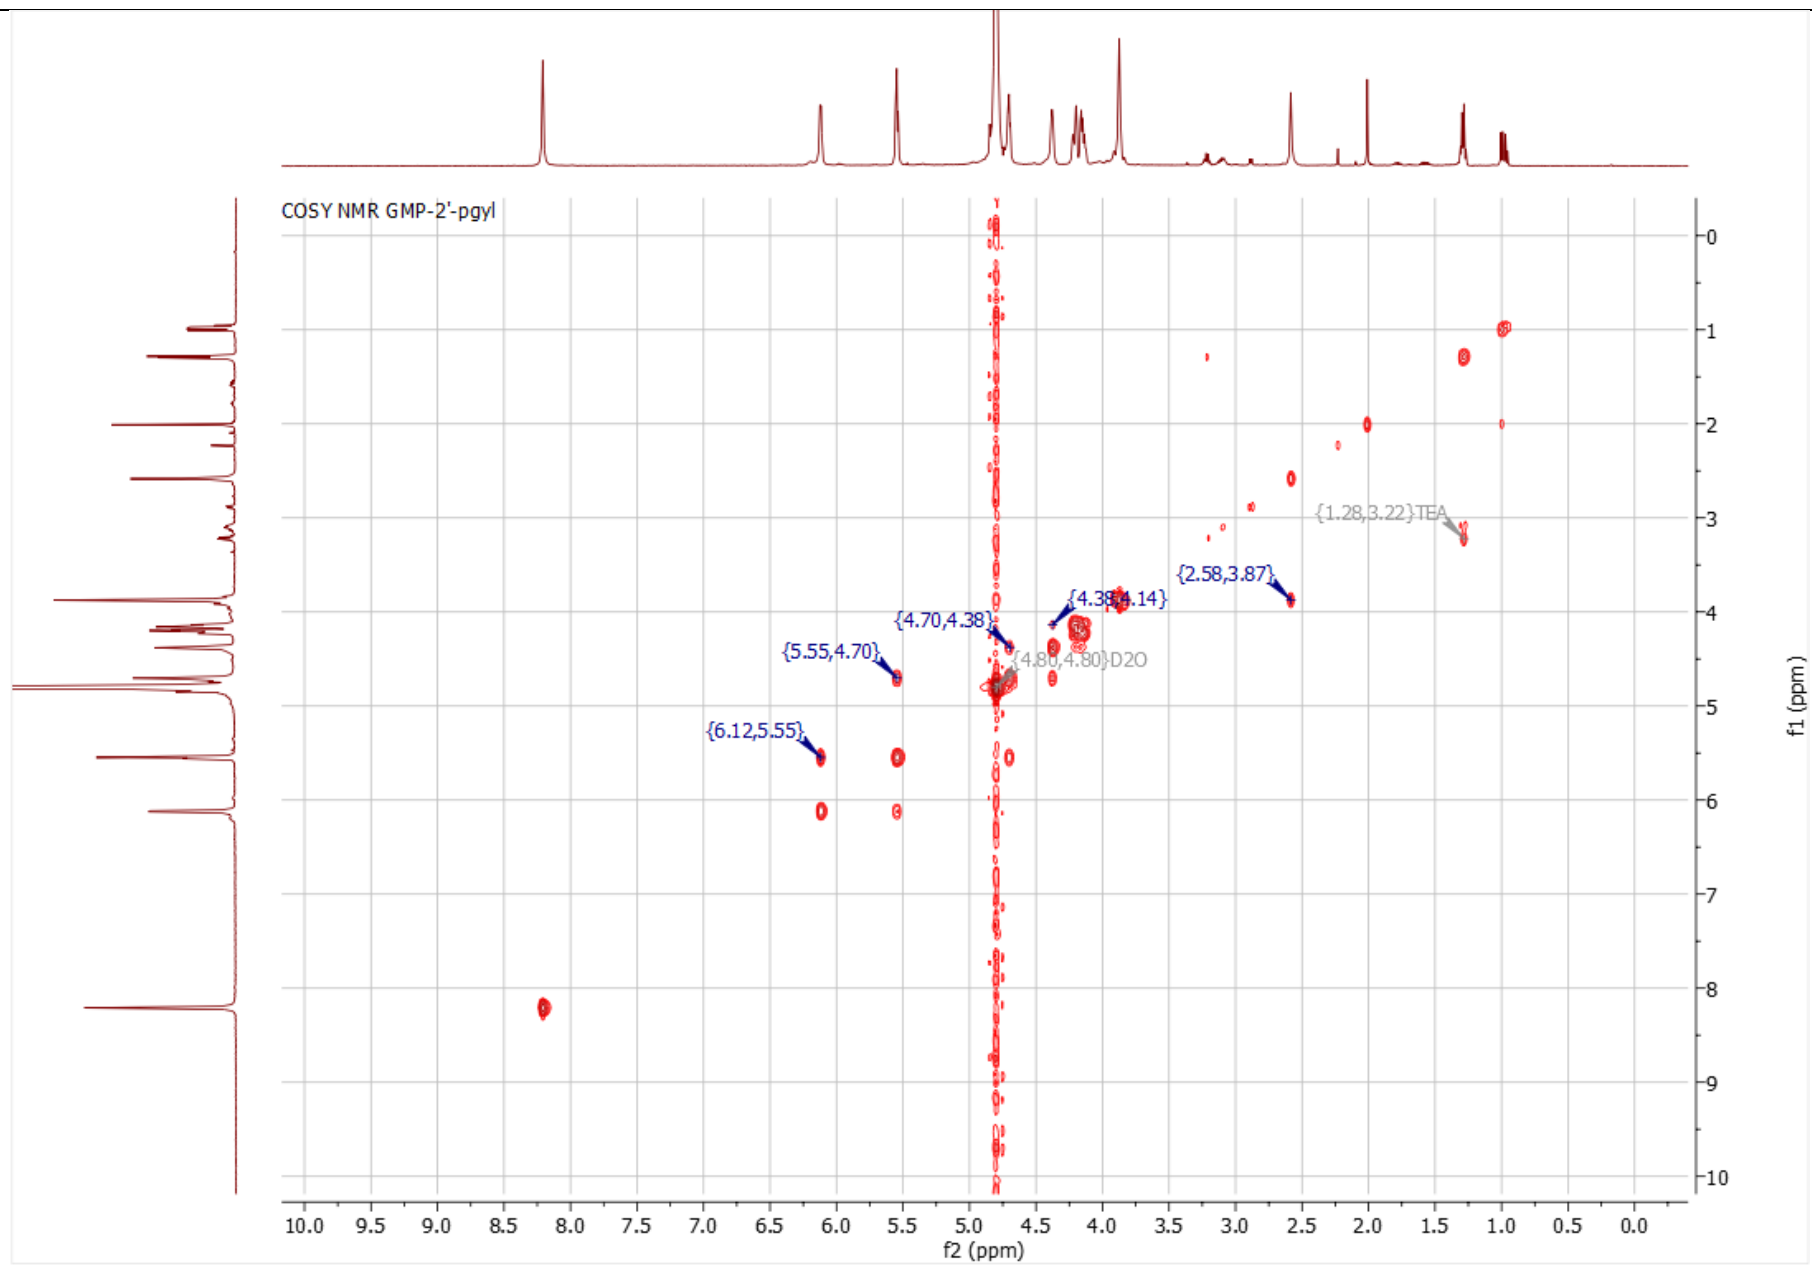

<sup>13</sup>C NMR (500 MHz, D<sub>2</sub>O, 25°C)

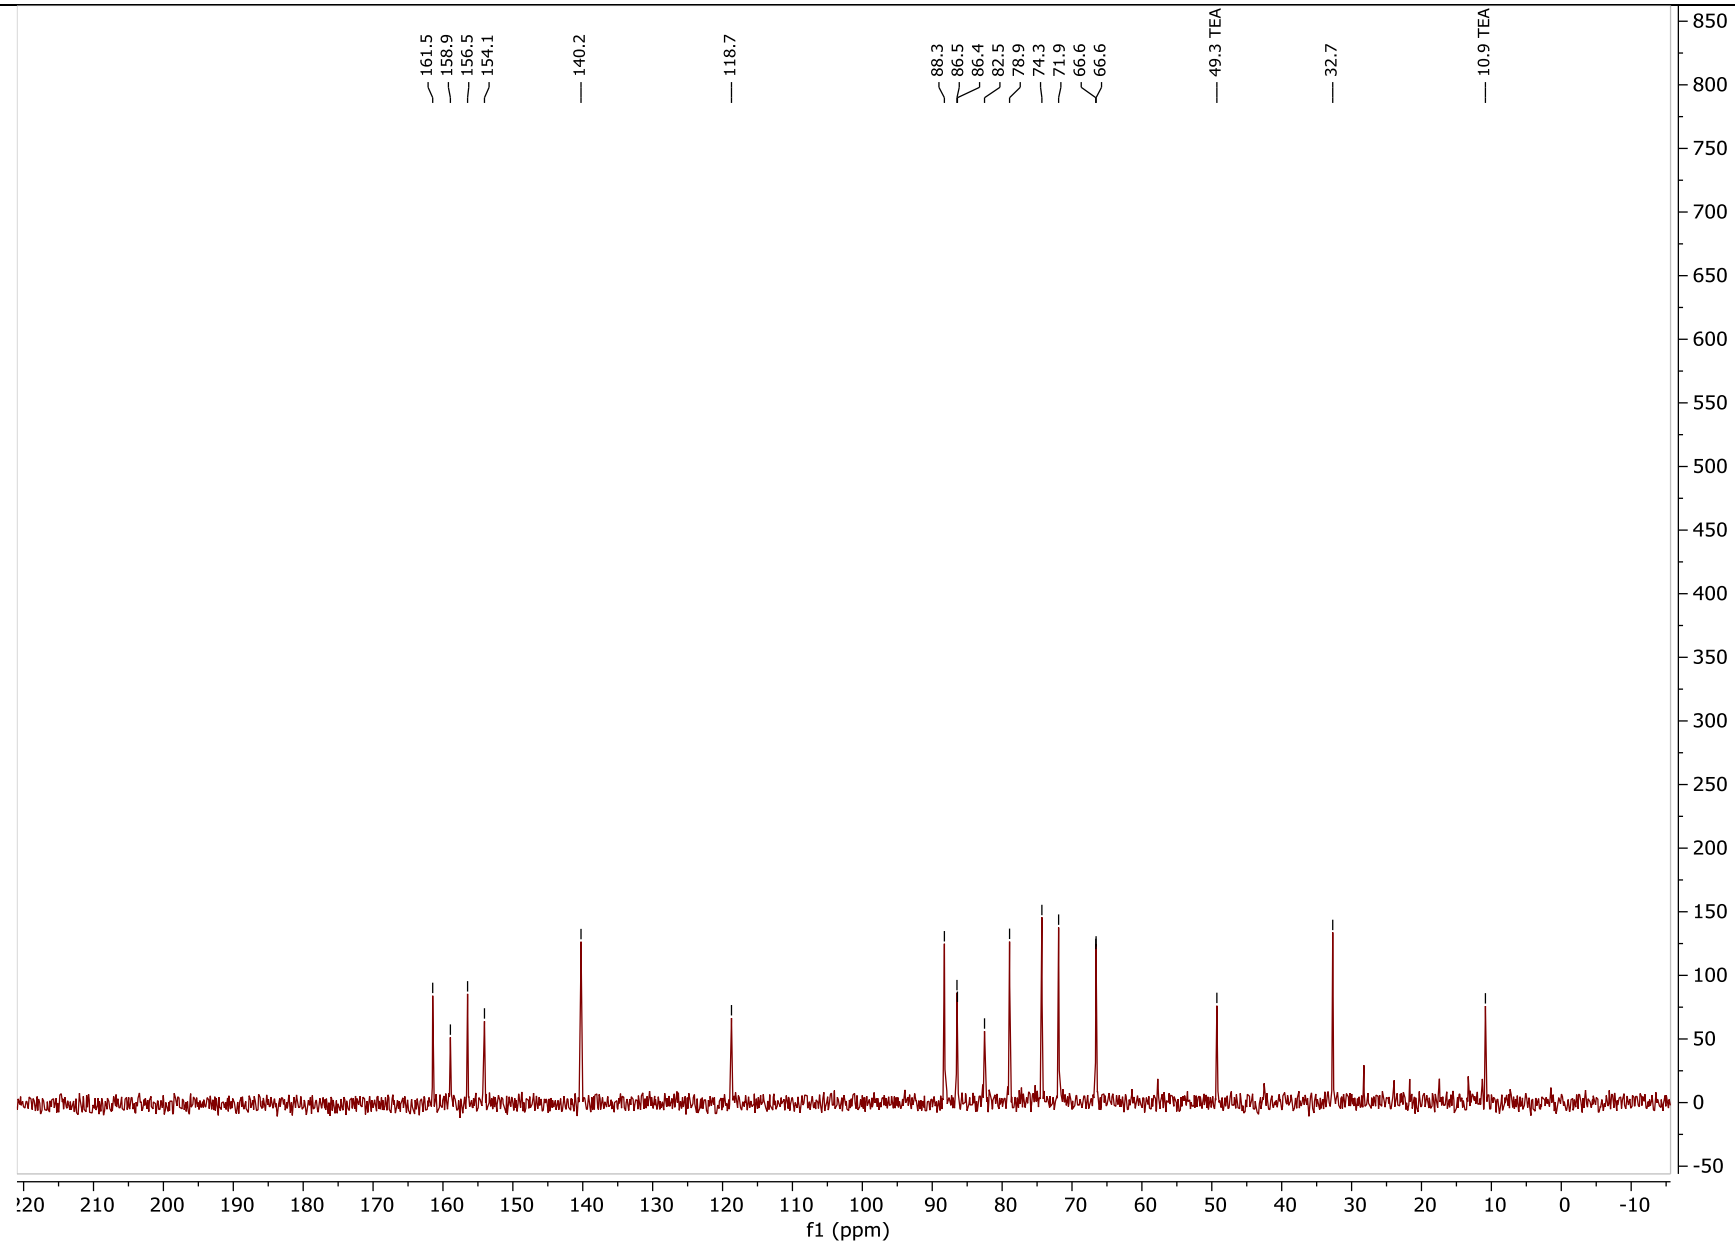

HSQC NMR

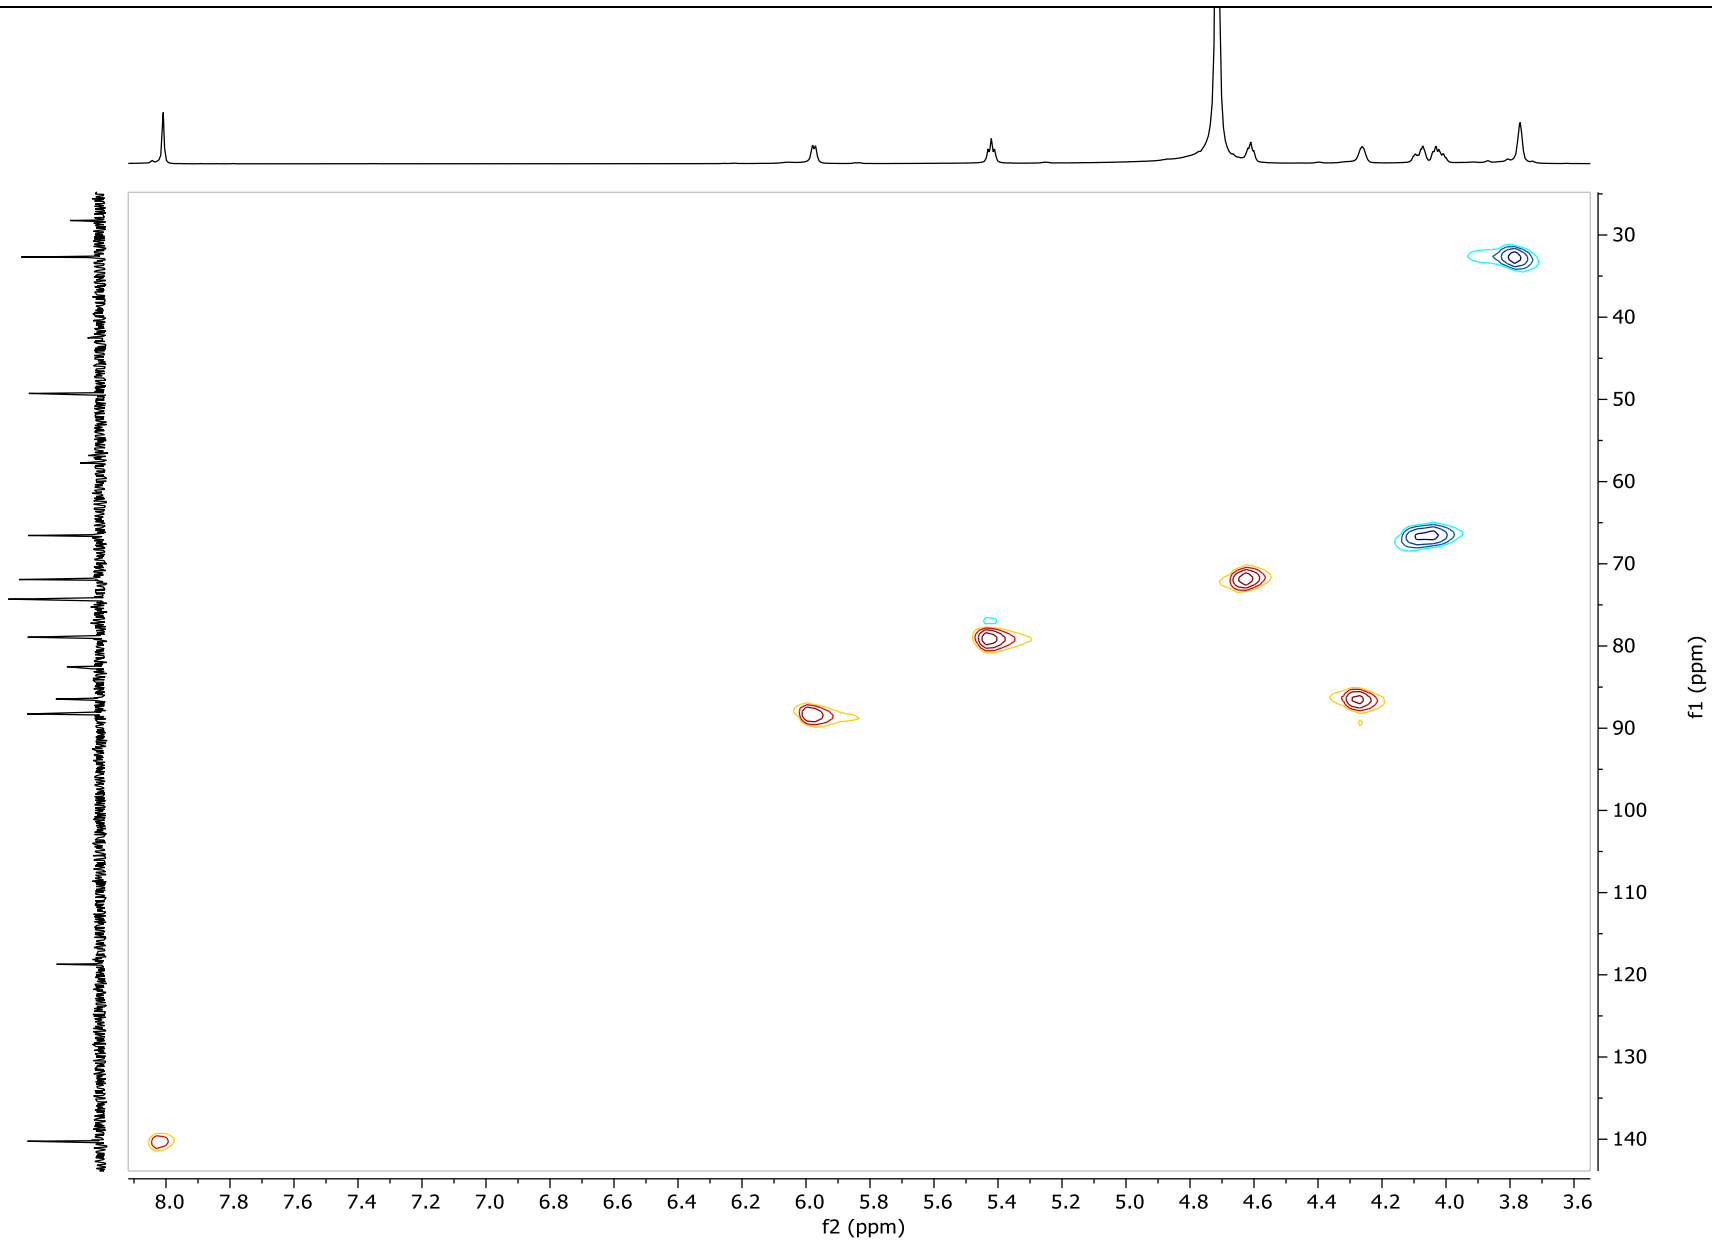

<sup>31</sup>P NMR (203 MHz, D<sub>2</sub>O, H<sub>3</sub>PO<sub>4</sub>, 25°C)

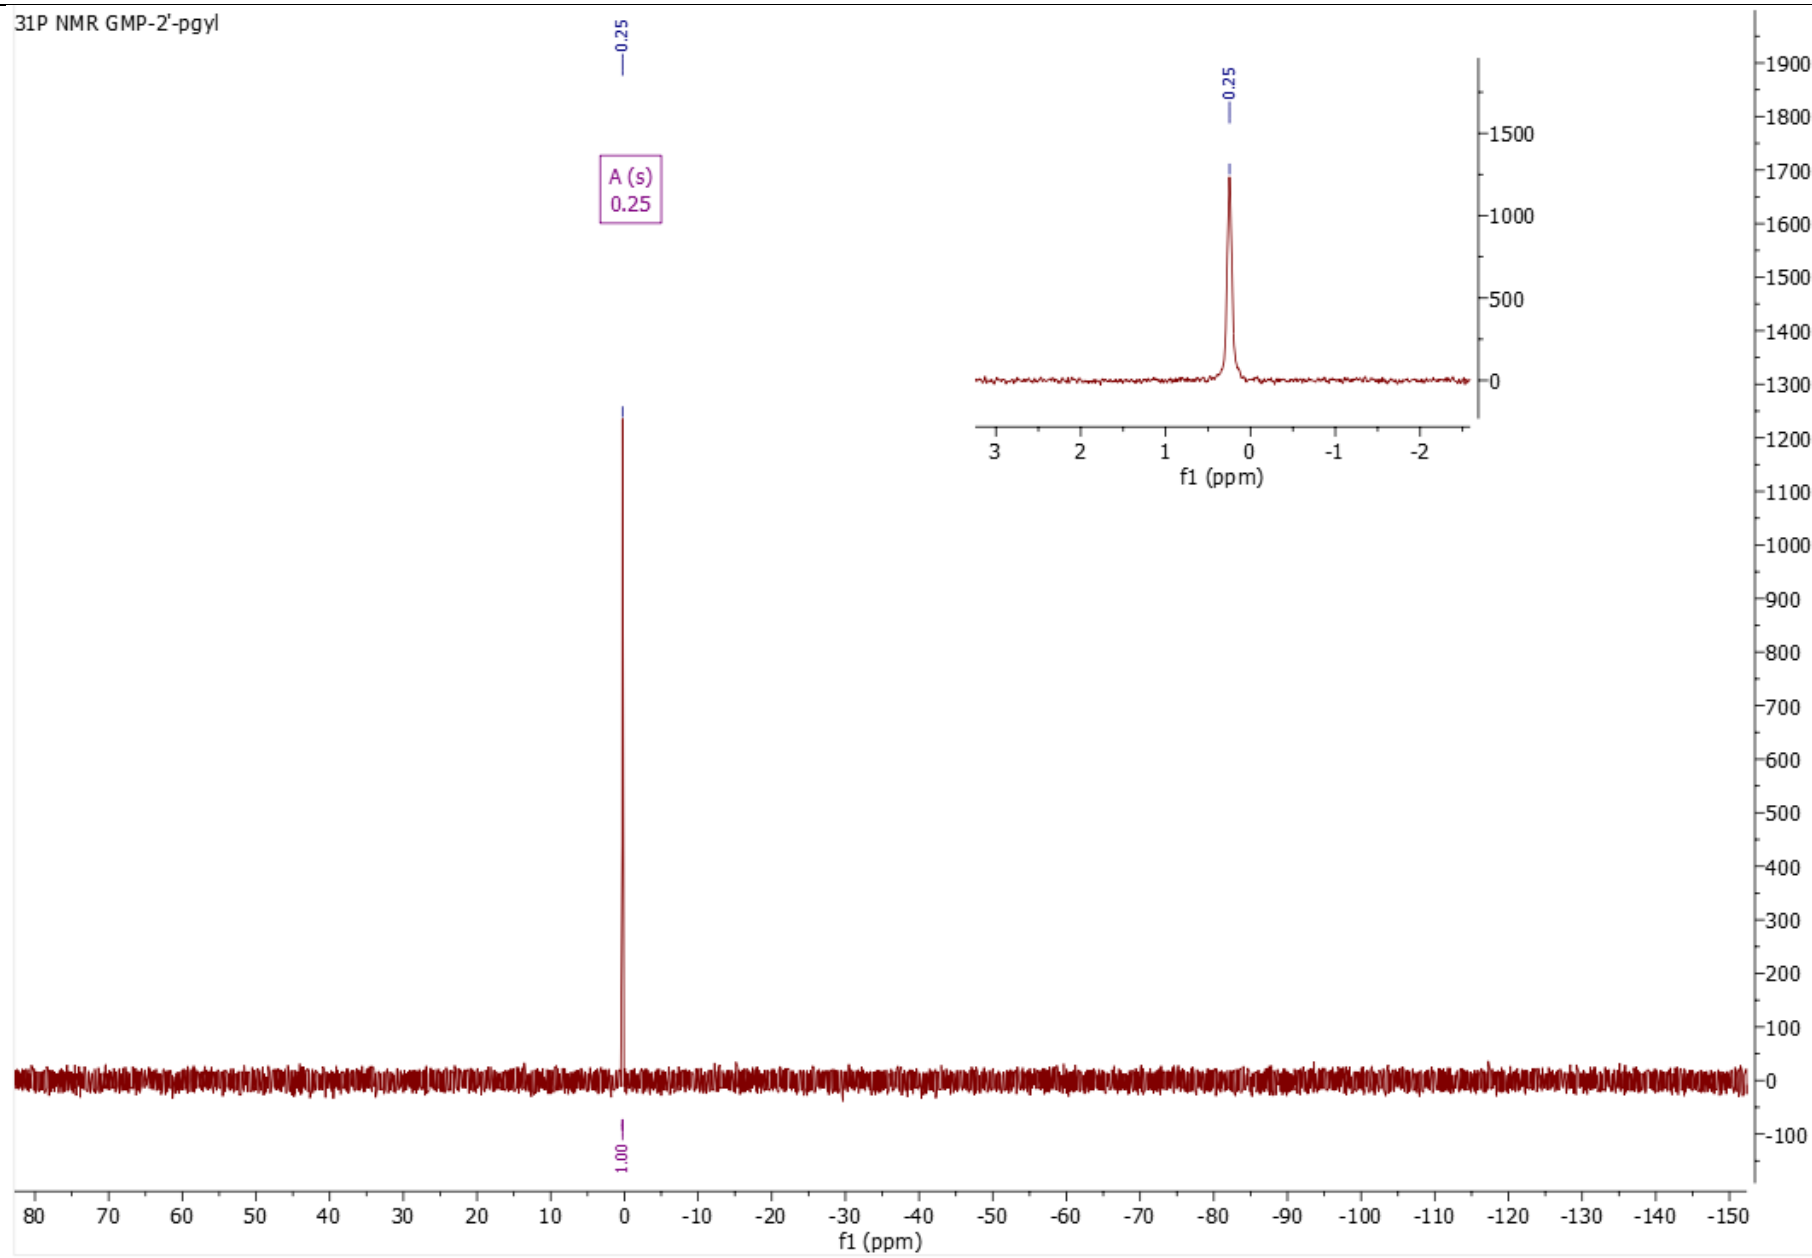

Compound 11-3': GMP-3'-O-C(O)-NH-C<sub>3</sub>H<sub>3</sub> (NH<sub>4</sub><sup>+</sup> salt)

Chemical structure

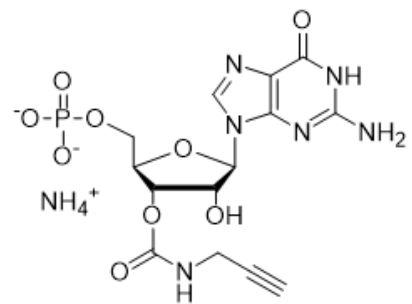

RP-HPLC (conditions c)

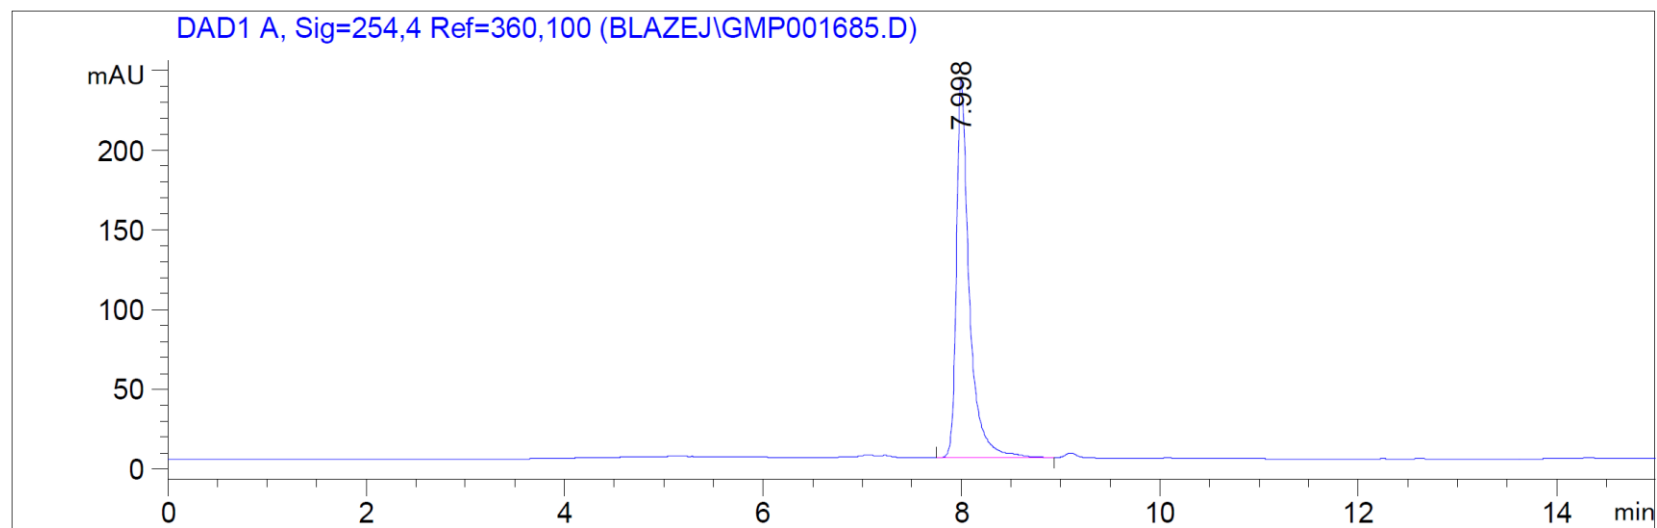

220329\_PSu\_03 #43-103 RT: 0.37-0.90 AV: 61 NL: 9.05E6  
T: FTMS - p ESI Full ms [160.0000-2000.0000]

MS (-) ESI (Calc. [M-H]<sup>-</sup> C<sub>14</sub>H<sub>16</sub>N<sub>6</sub>O<sub>9</sub>P<sup>-</sup> : 443.0722, found: 443.07271)

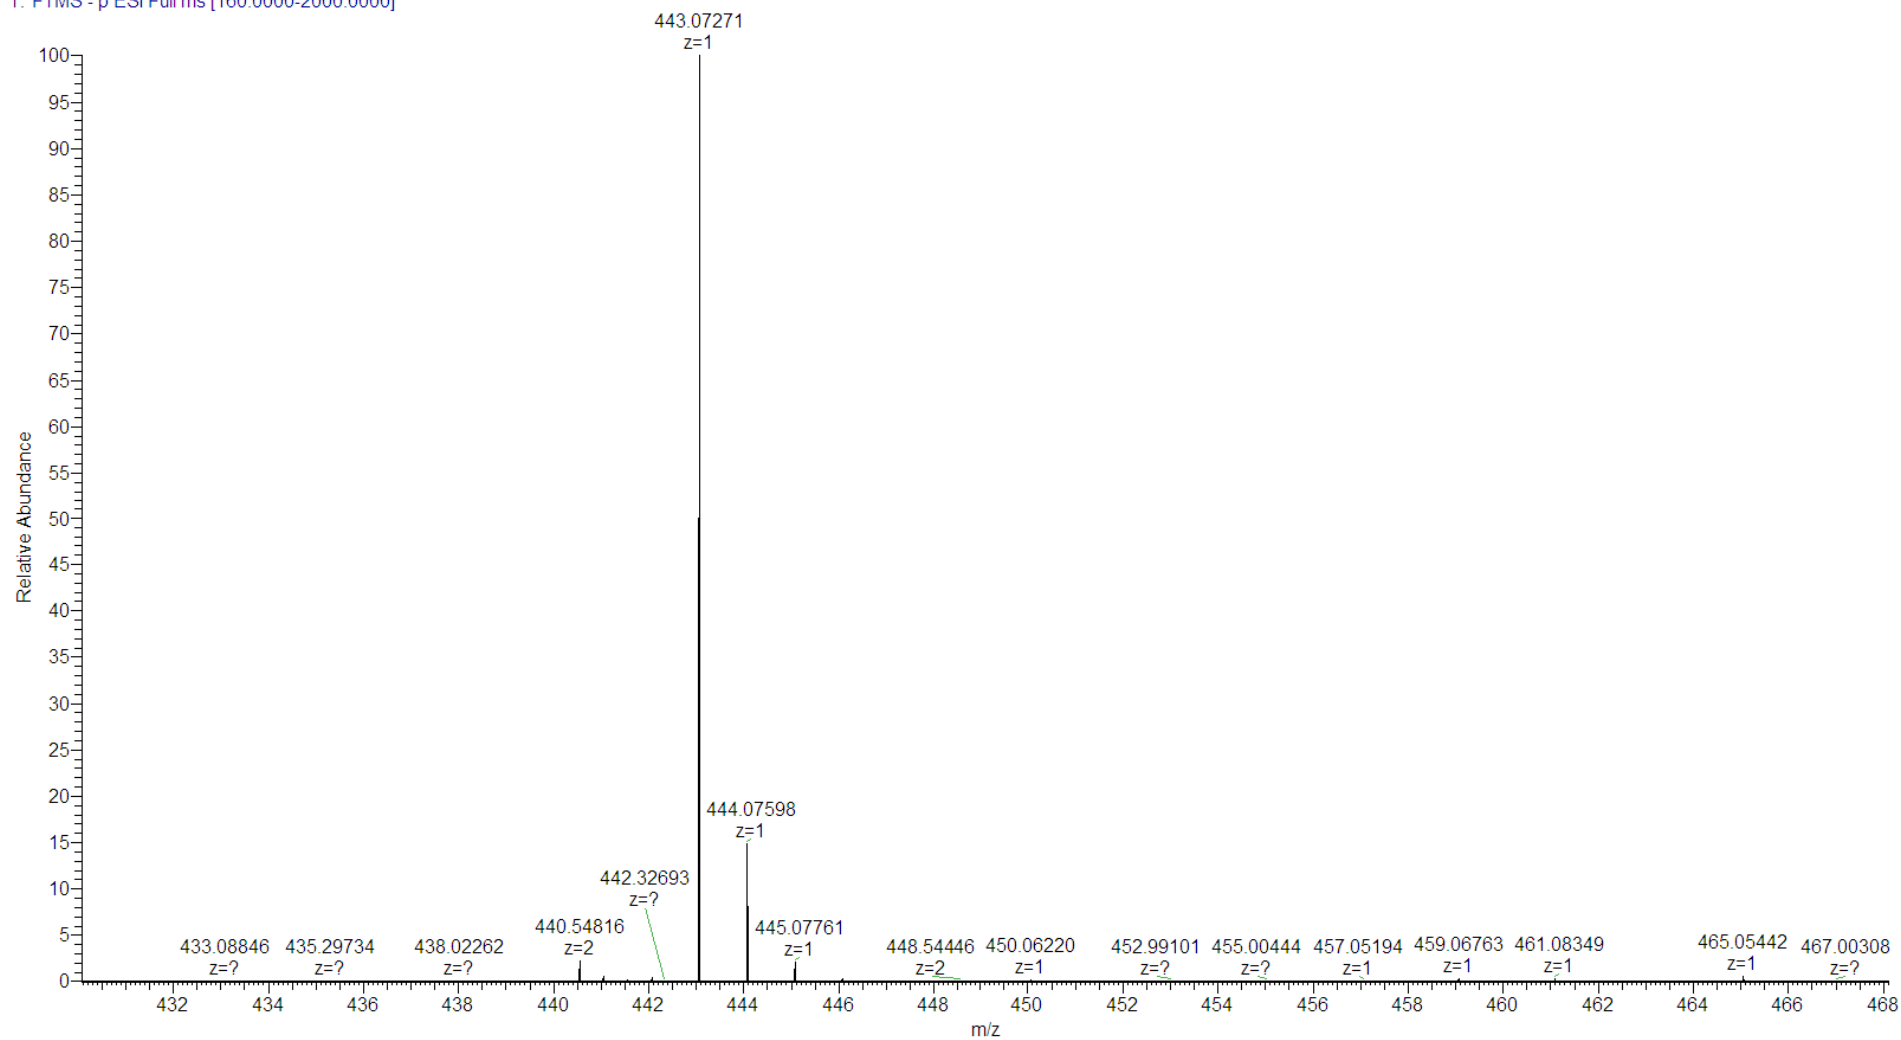

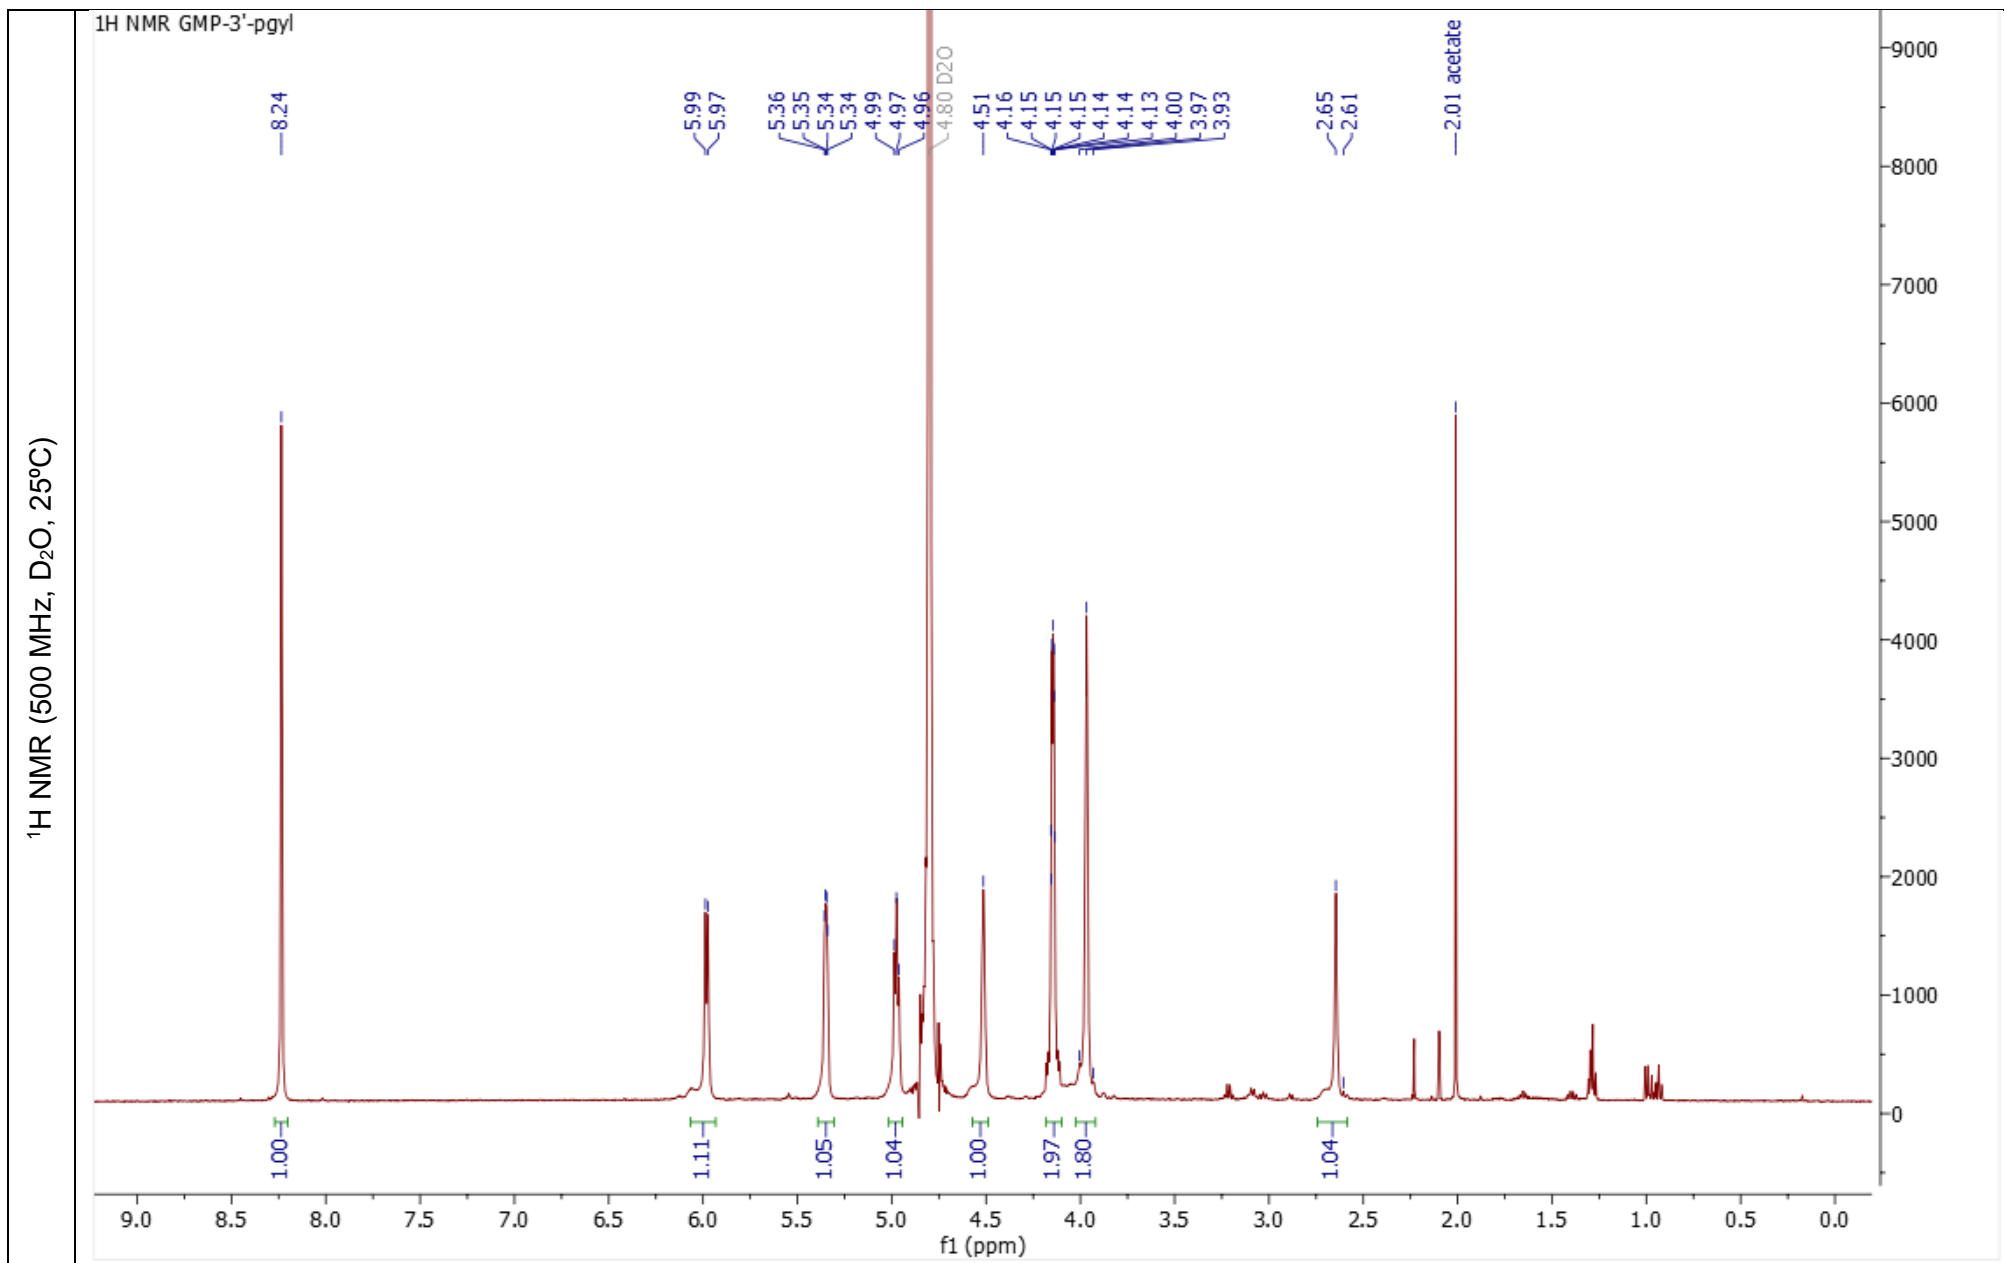



COSY NMR

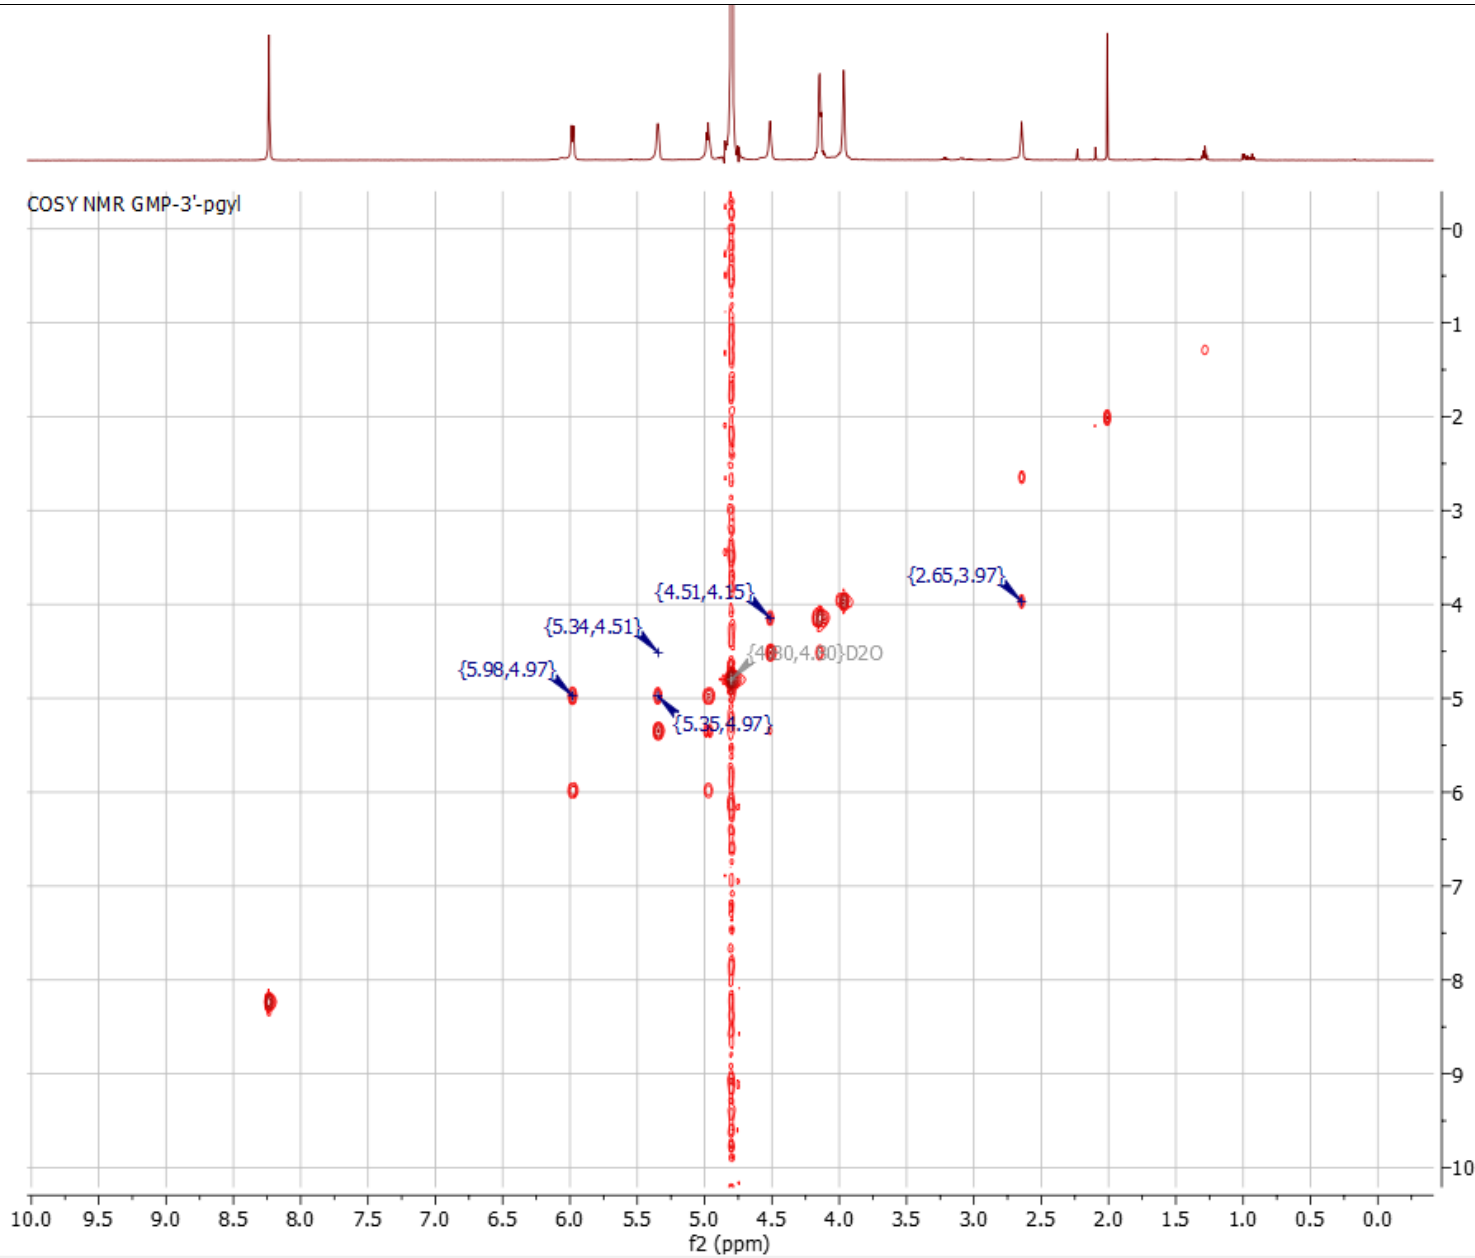

<sup>13</sup>C NMR (500 MHz, D<sub>2</sub>O, 25°C)

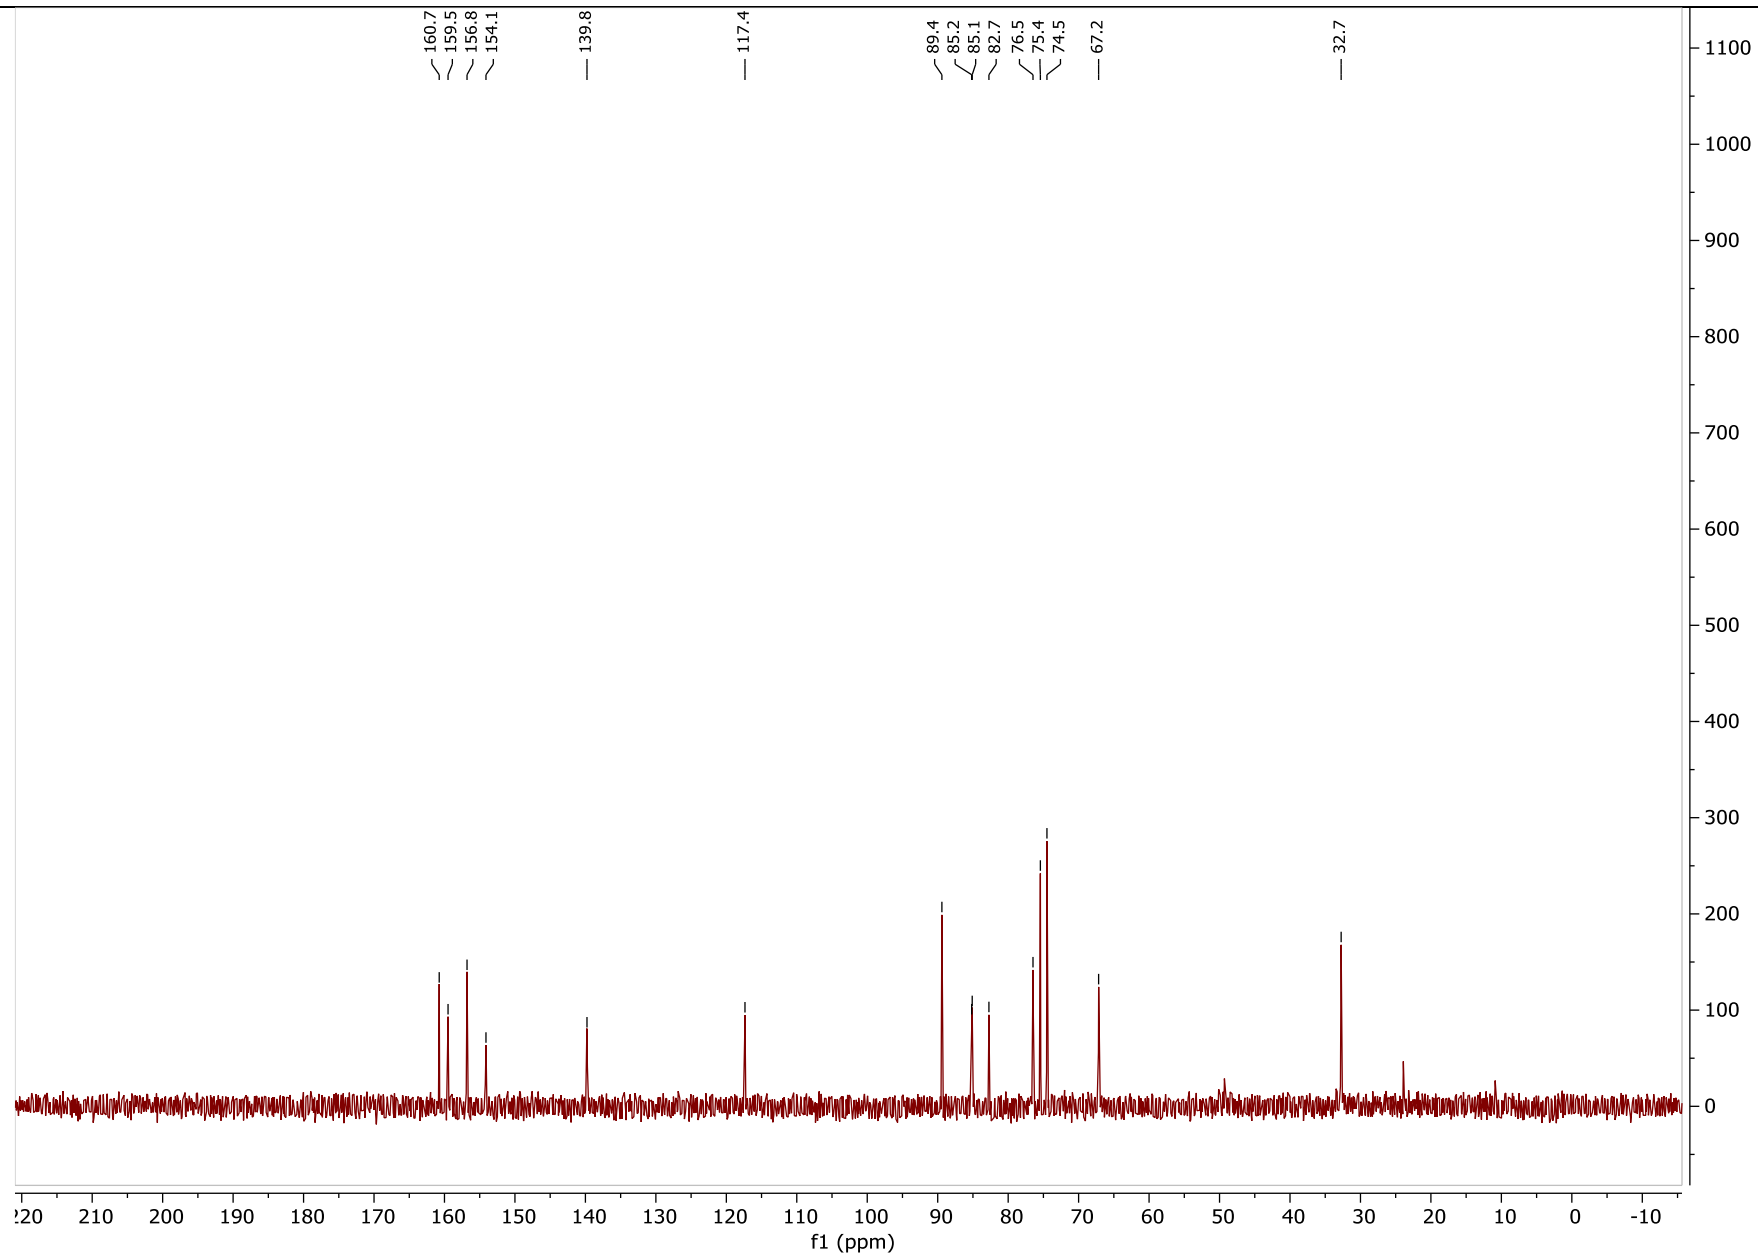

HSQC NMR

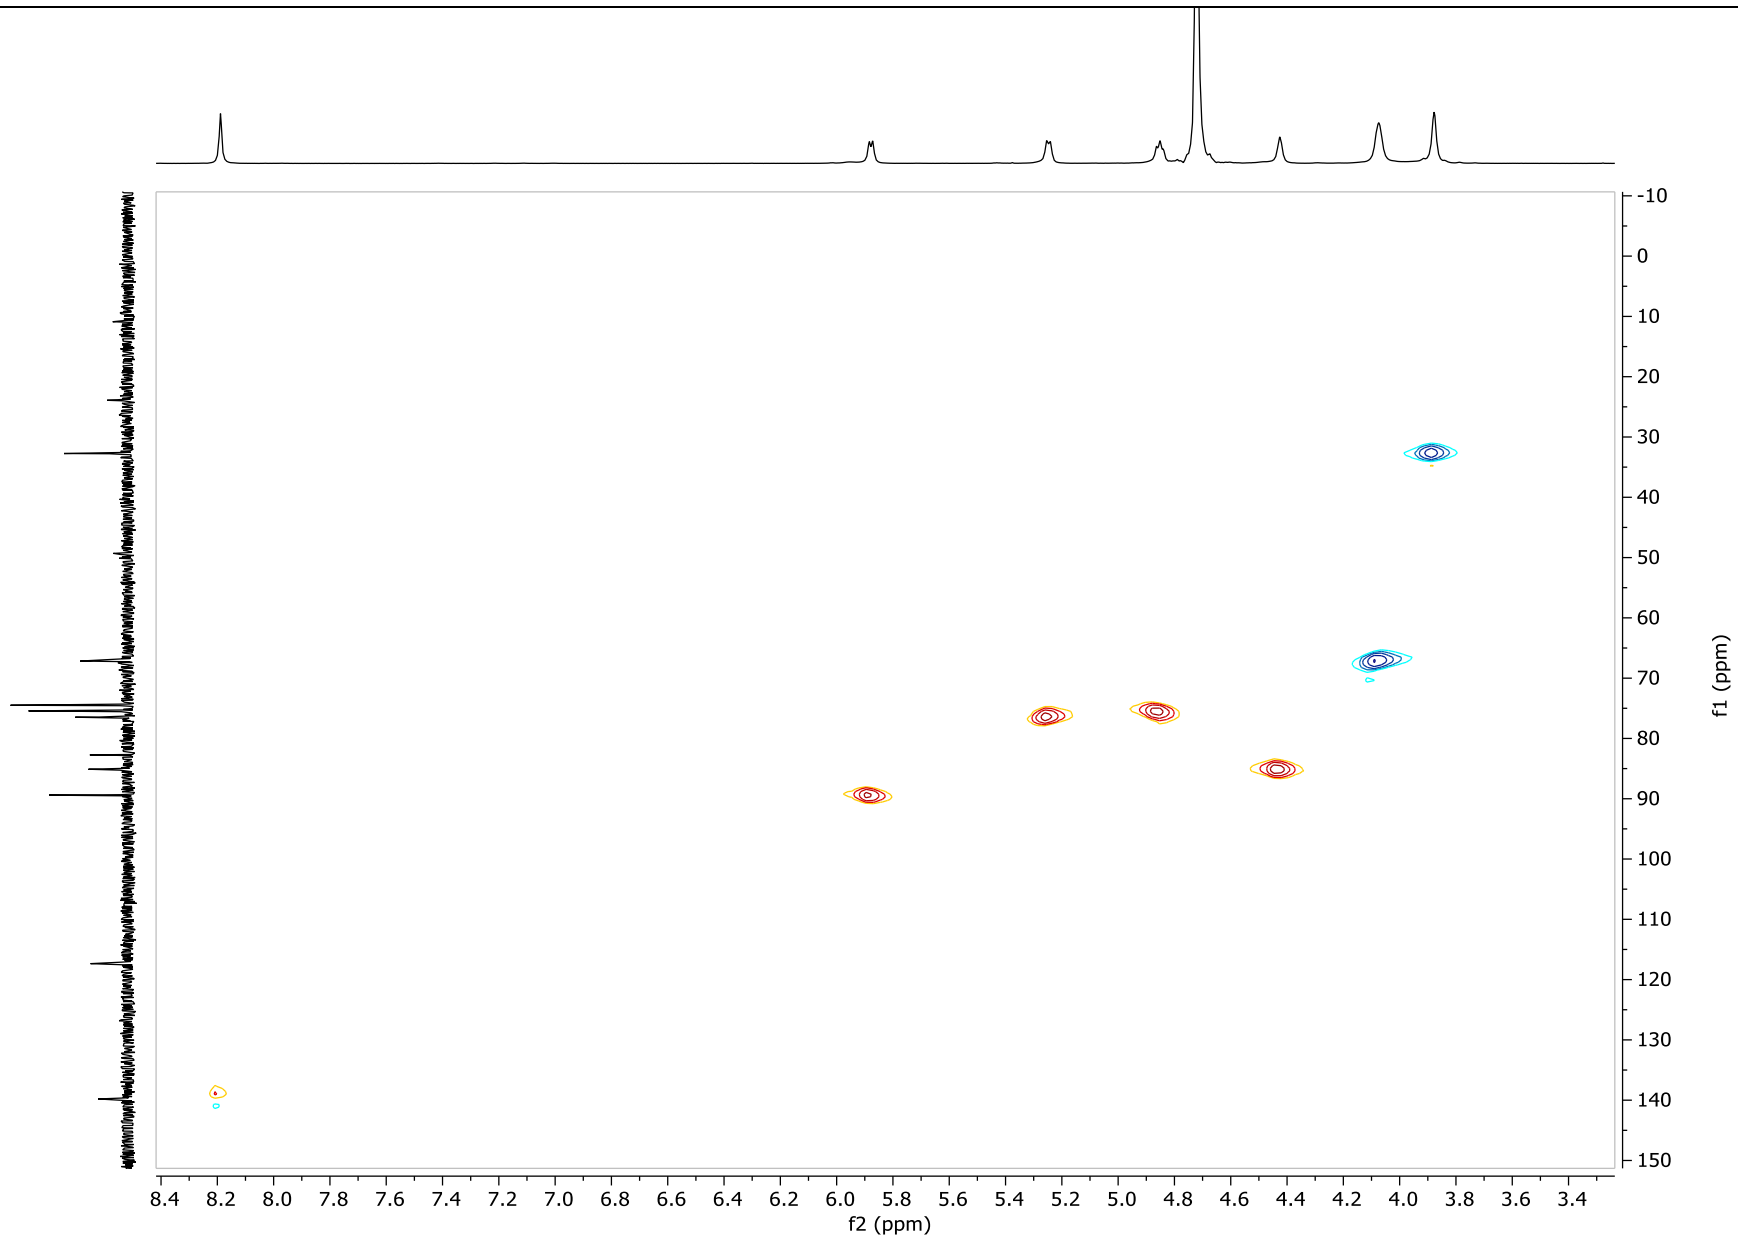

<sup>31</sup>P NMR (203 MHz, D<sub>2</sub>O, H<sub>3</sub>PO<sub>4</sub>, 25°C)

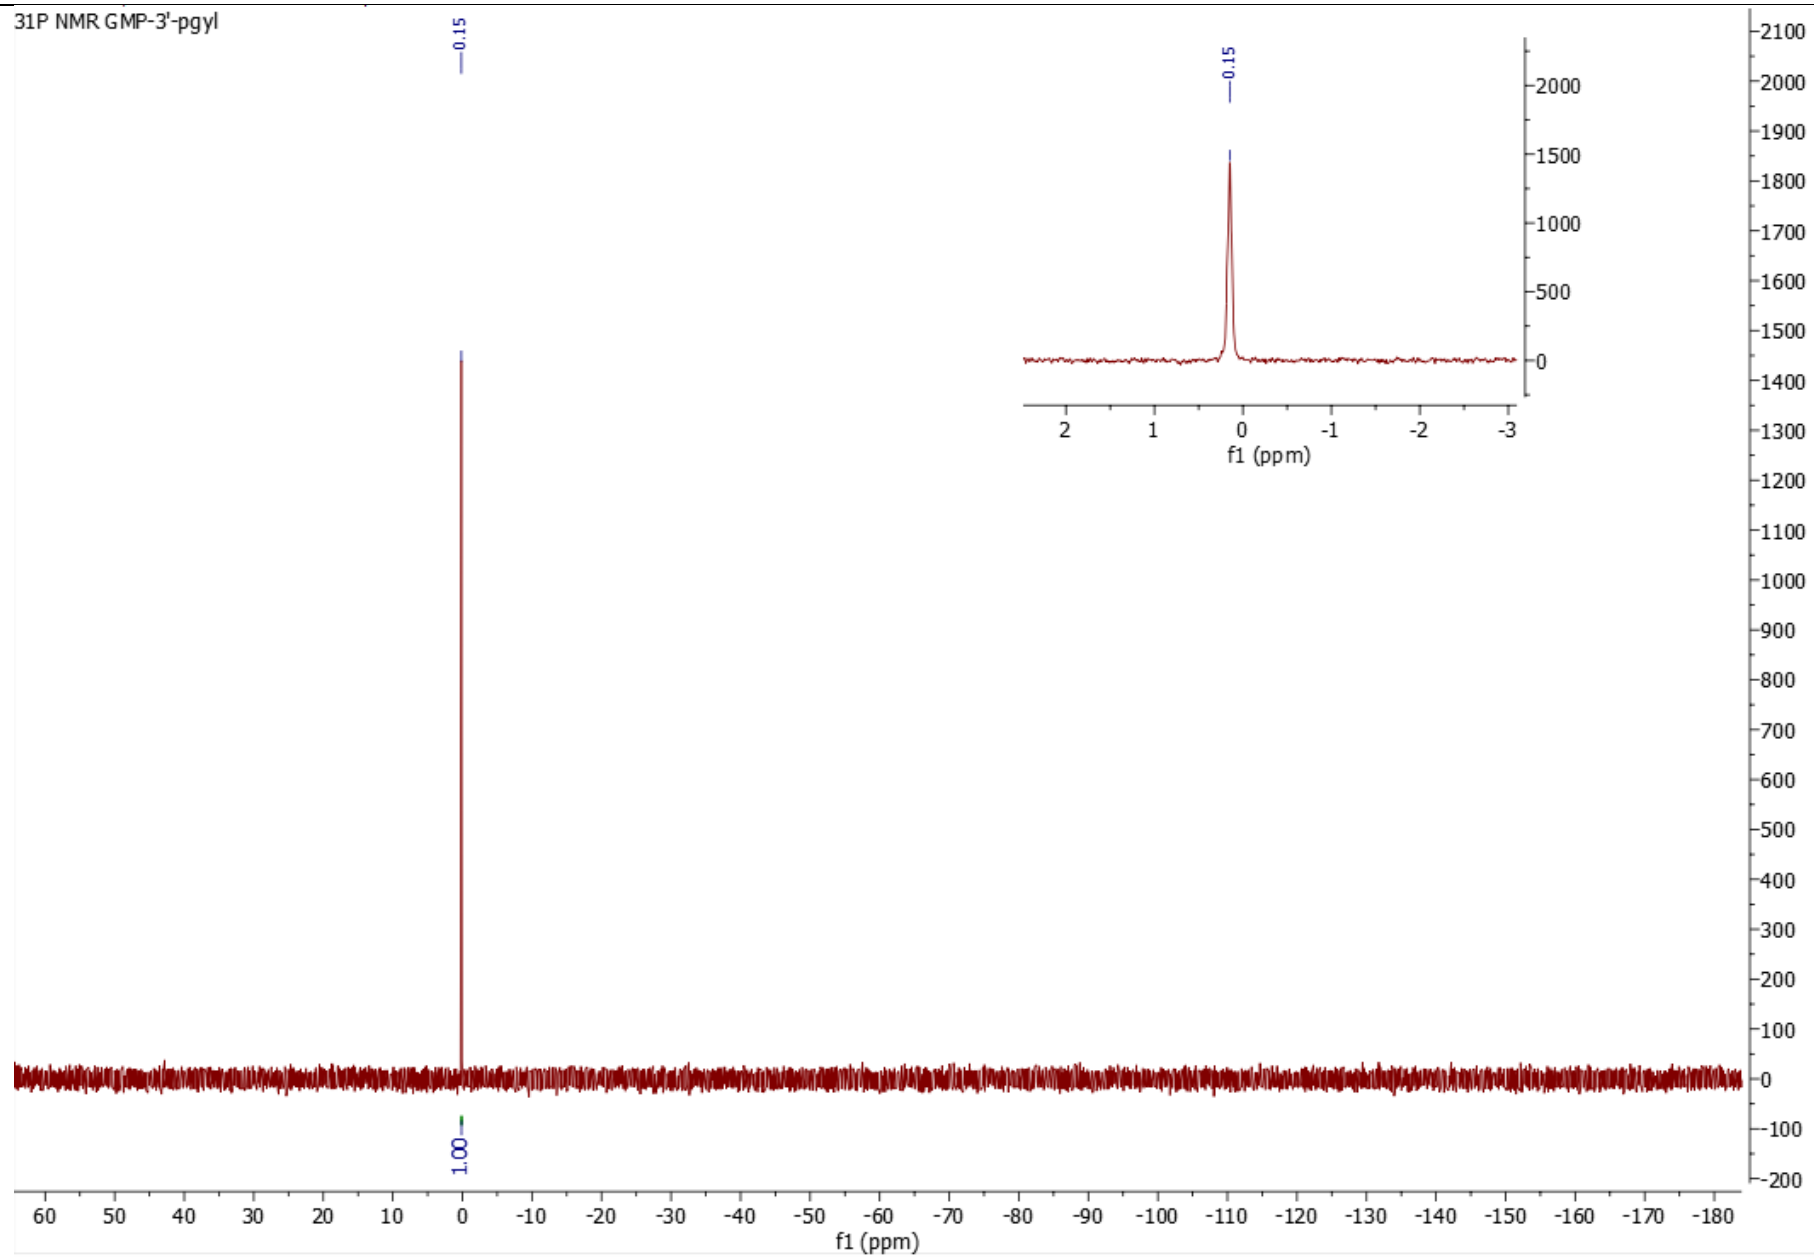

Compound 1a-2': TMGpppG-2'-O-C(O)-NH-CH<sub>2</sub>-CH<sub>2</sub>-triazole-CH<sub>2</sub>-DMHBI (NH<sub>4</sub><sup>+</sup> salt)

Chemical structure

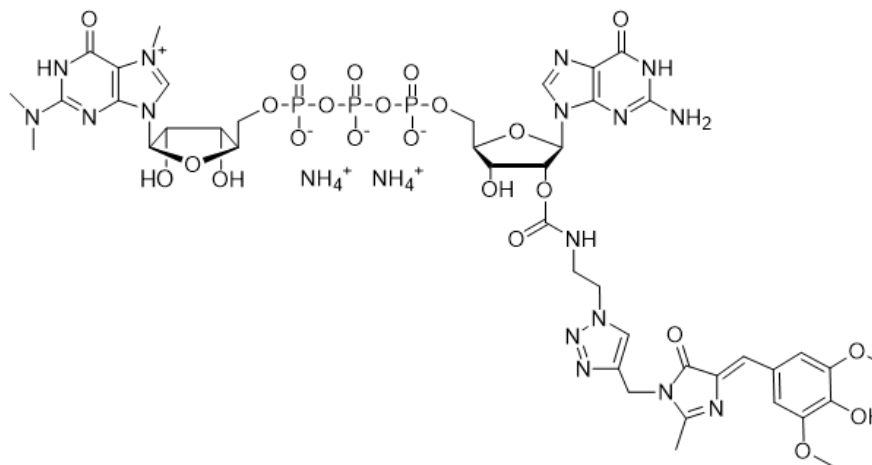

RP-HPLC (conditions c)

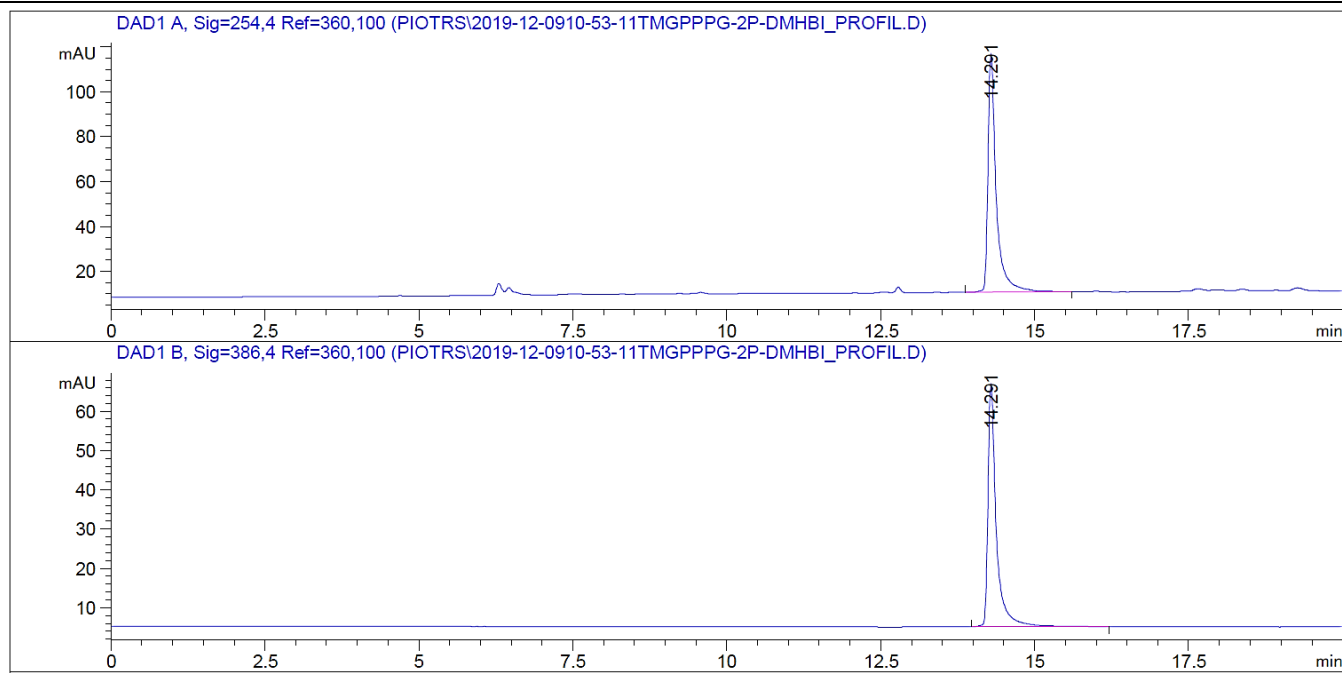

MS (-) ESI (Calc. [M-H]<sup>-</sup> C<sub>42</sub>H<sub>52</sub>N<sub>16</sub>O<sub>23</sub>P<sub>3</sub> : 1241.2610, found: 1241.26563)

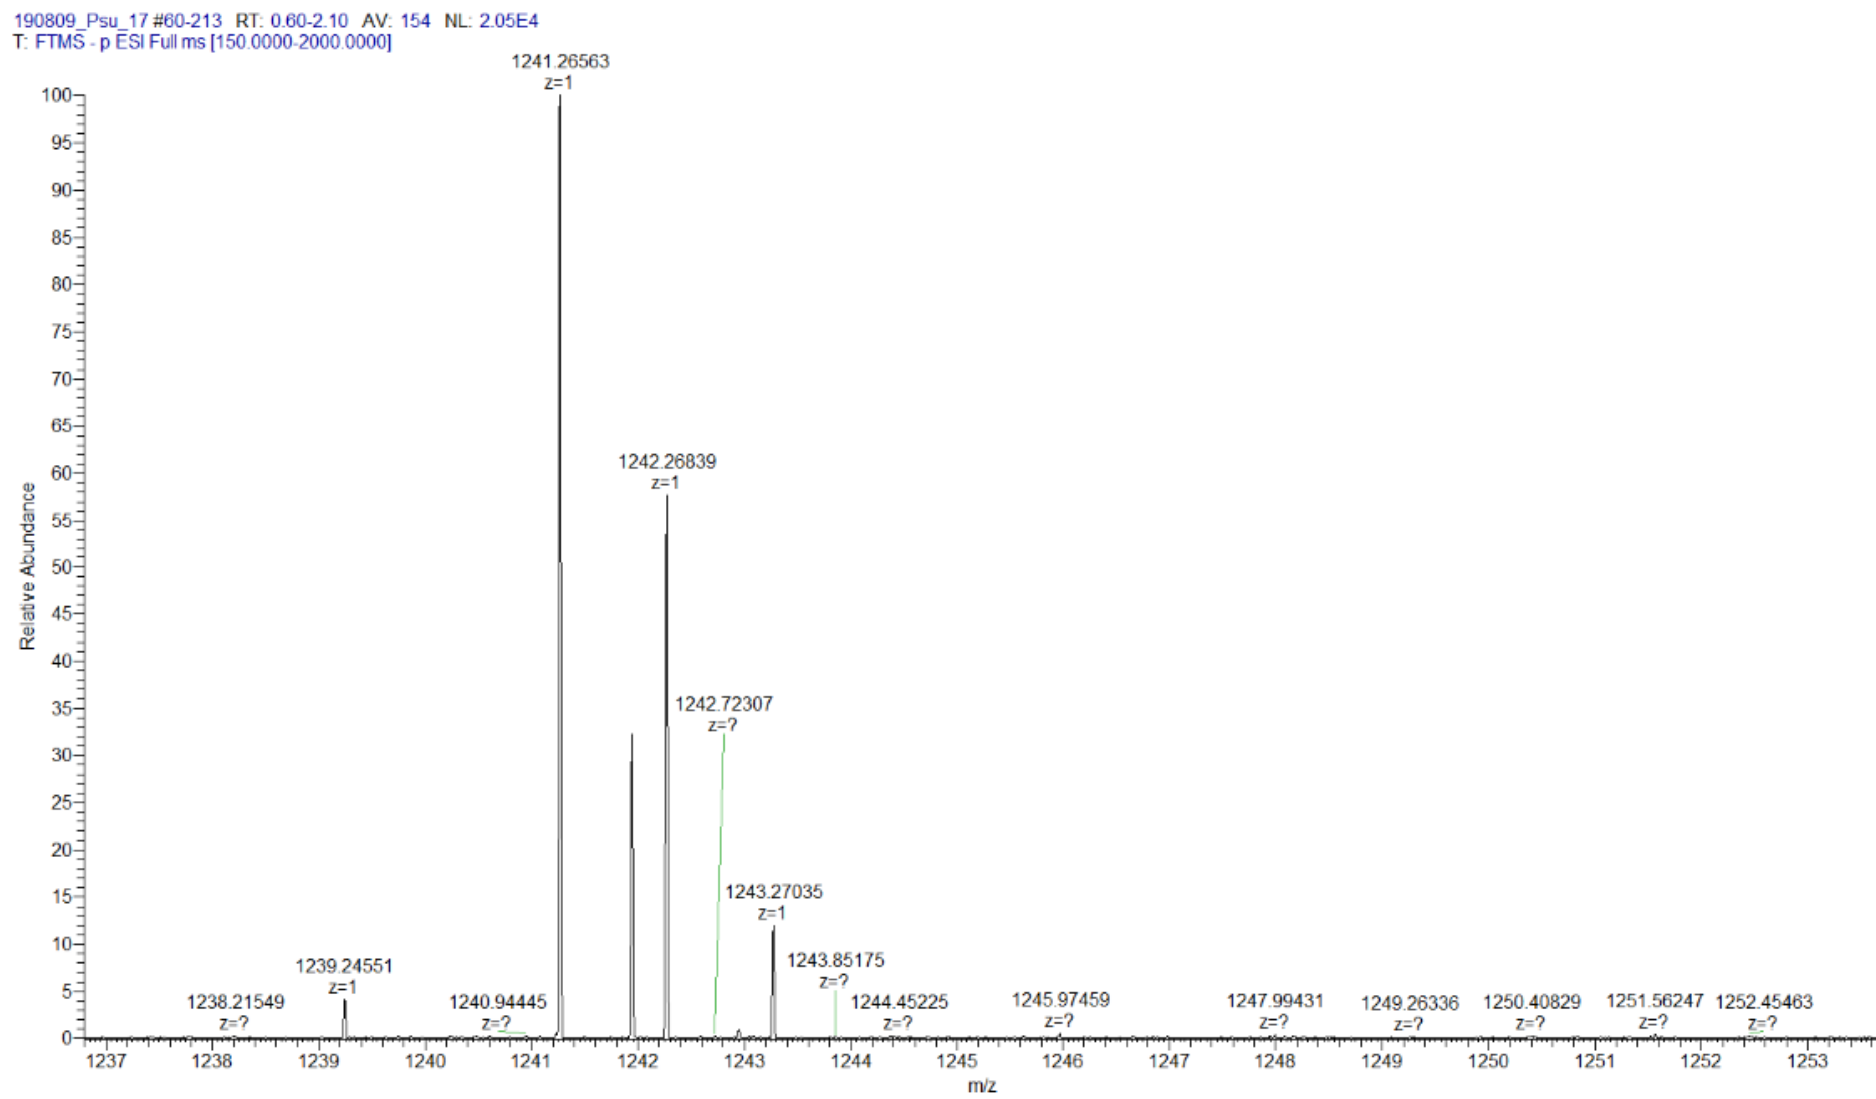

Compound 1a-3': TMGpppG-3'-O-C(O)-NH-CH<sub>2</sub>-CH<sub>2</sub>-triazole-CH<sub>2</sub>-DMHBI (NH<sub>4</sub><sup>+</sup> salt)

Chemical structure

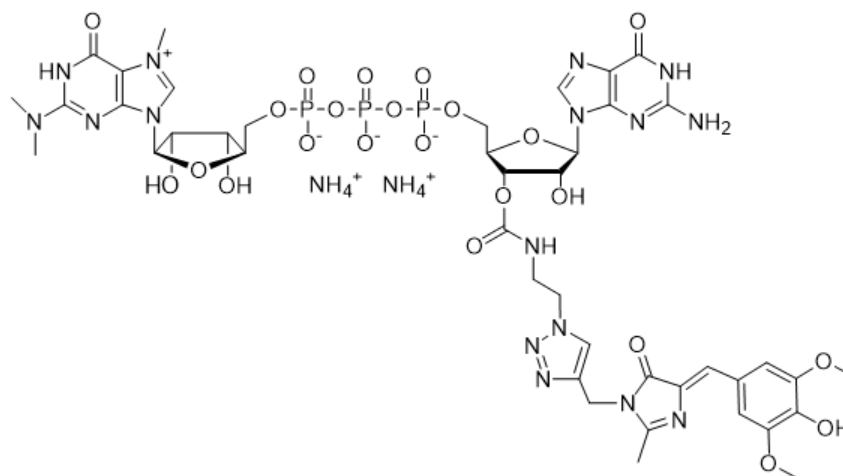

RP-HPLC (conditions c)

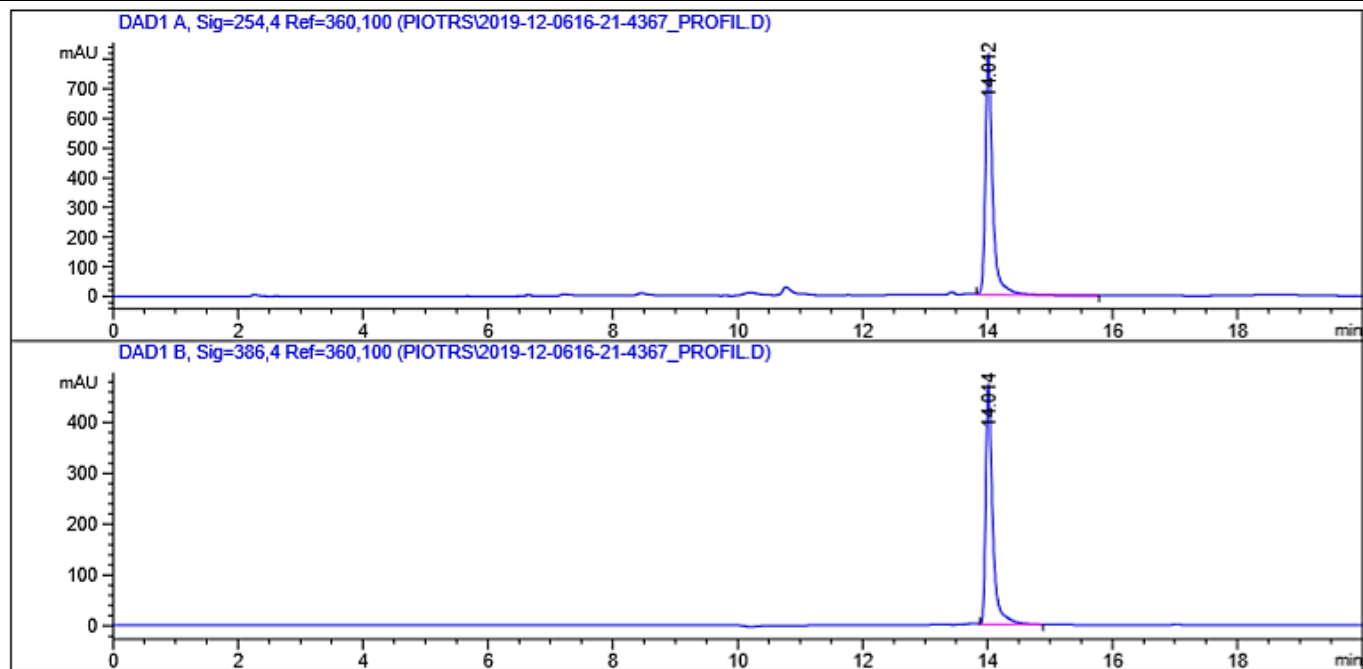

MS (-) ESI (Calc. [M-H]<sup>-</sup> C<sub>42</sub>H<sub>52</sub>N<sub>16</sub>O<sub>23</sub>P<sub>3</sub> : 1241.2610, found: 1241.26253)

191107\_PSu\_29#2-74 RT: 0.02-0.75 AV: 73 NL: 3.44E6  
T: FTMS - p ESI Full ms [150.0000-2000.0000]

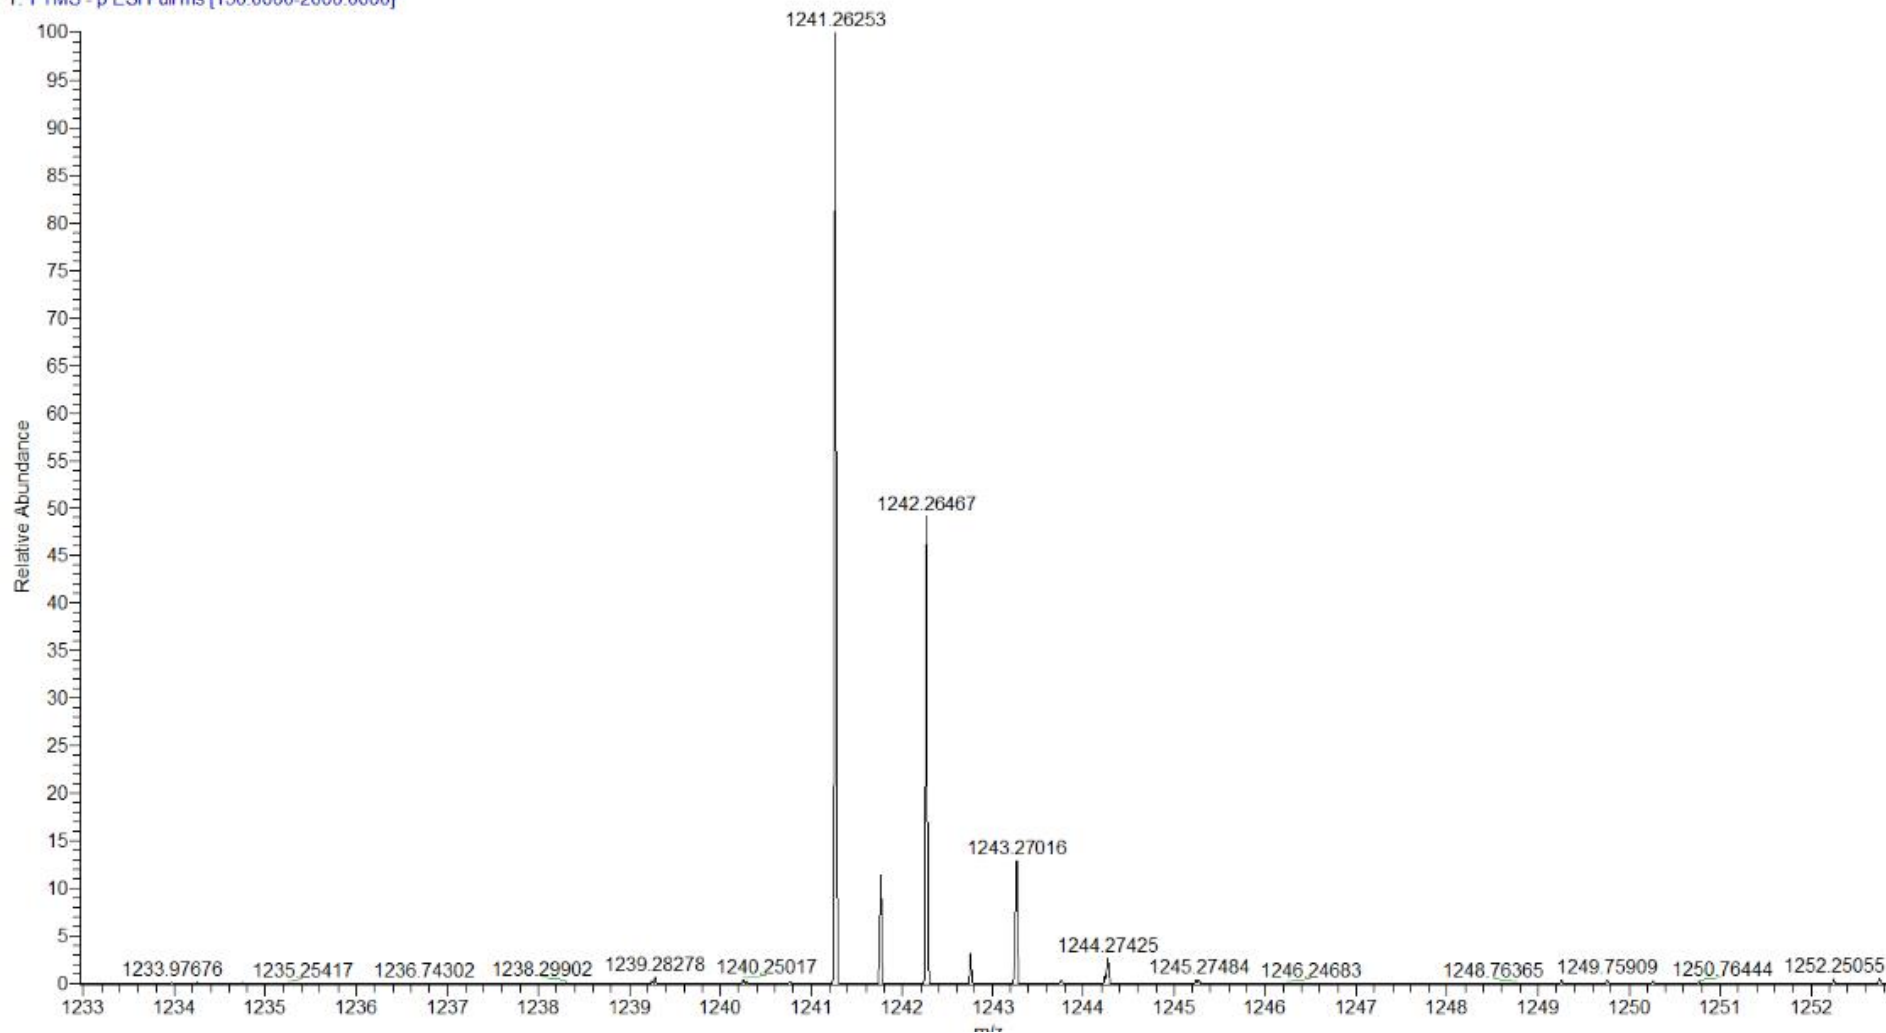



Compound 1b-2': TMGpppG-2'-O-C(O)-NH-CH<sub>2</sub>-CH<sub>2</sub>-triazole-CH<sub>2</sub>-oHBI (NH<sub>4</sub><sup>+</sup> salt)

Chemical structure

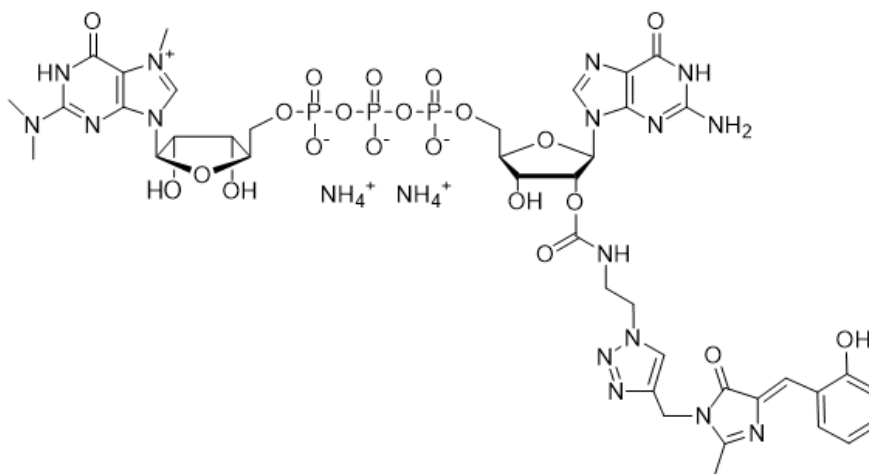

RP-HPLC (conditions b)

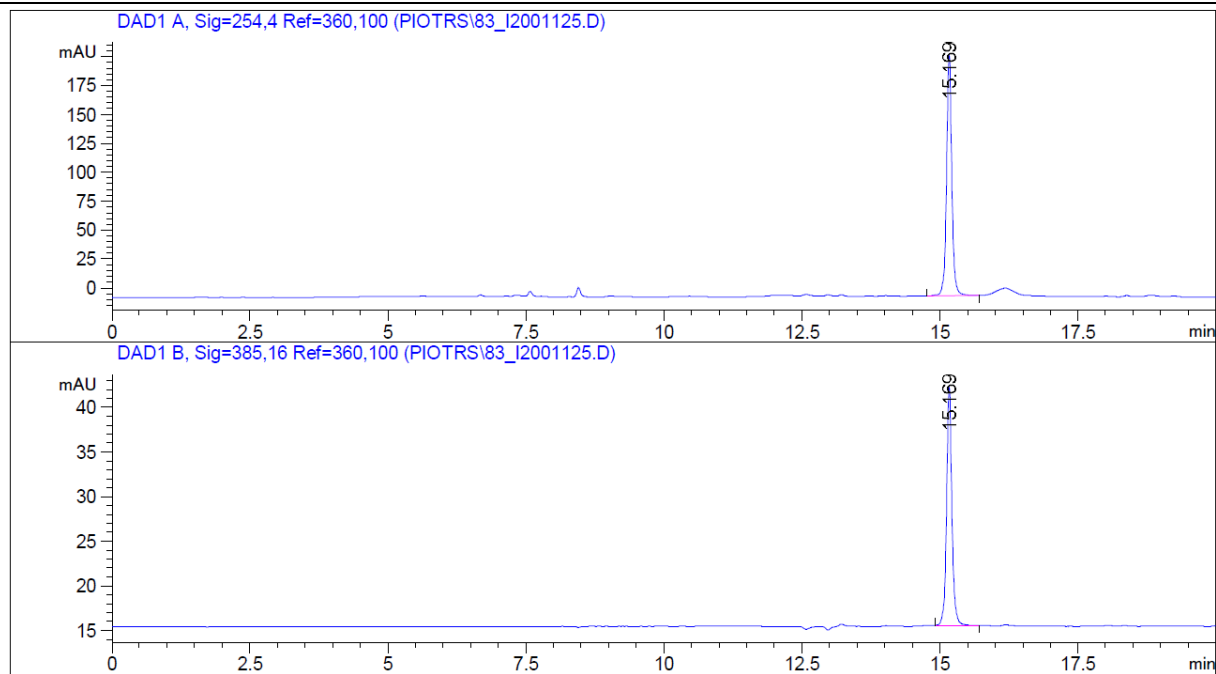

MS (-) ESI (Calc. [M-H]<sup>-</sup> C<sub>40</sub>H<sub>48</sub>N<sub>16</sub>O<sub>21</sub>P<sub>3</sub><sup>-</sup> : 1181.2398, found: 1181.24115)

220214\_PSu\_63b #7-61 RT: 0.06-0.54 AV: 55 NL: 3.02E5  
T: FTMS - p ESI Full ms [160.0000-2000.0000]

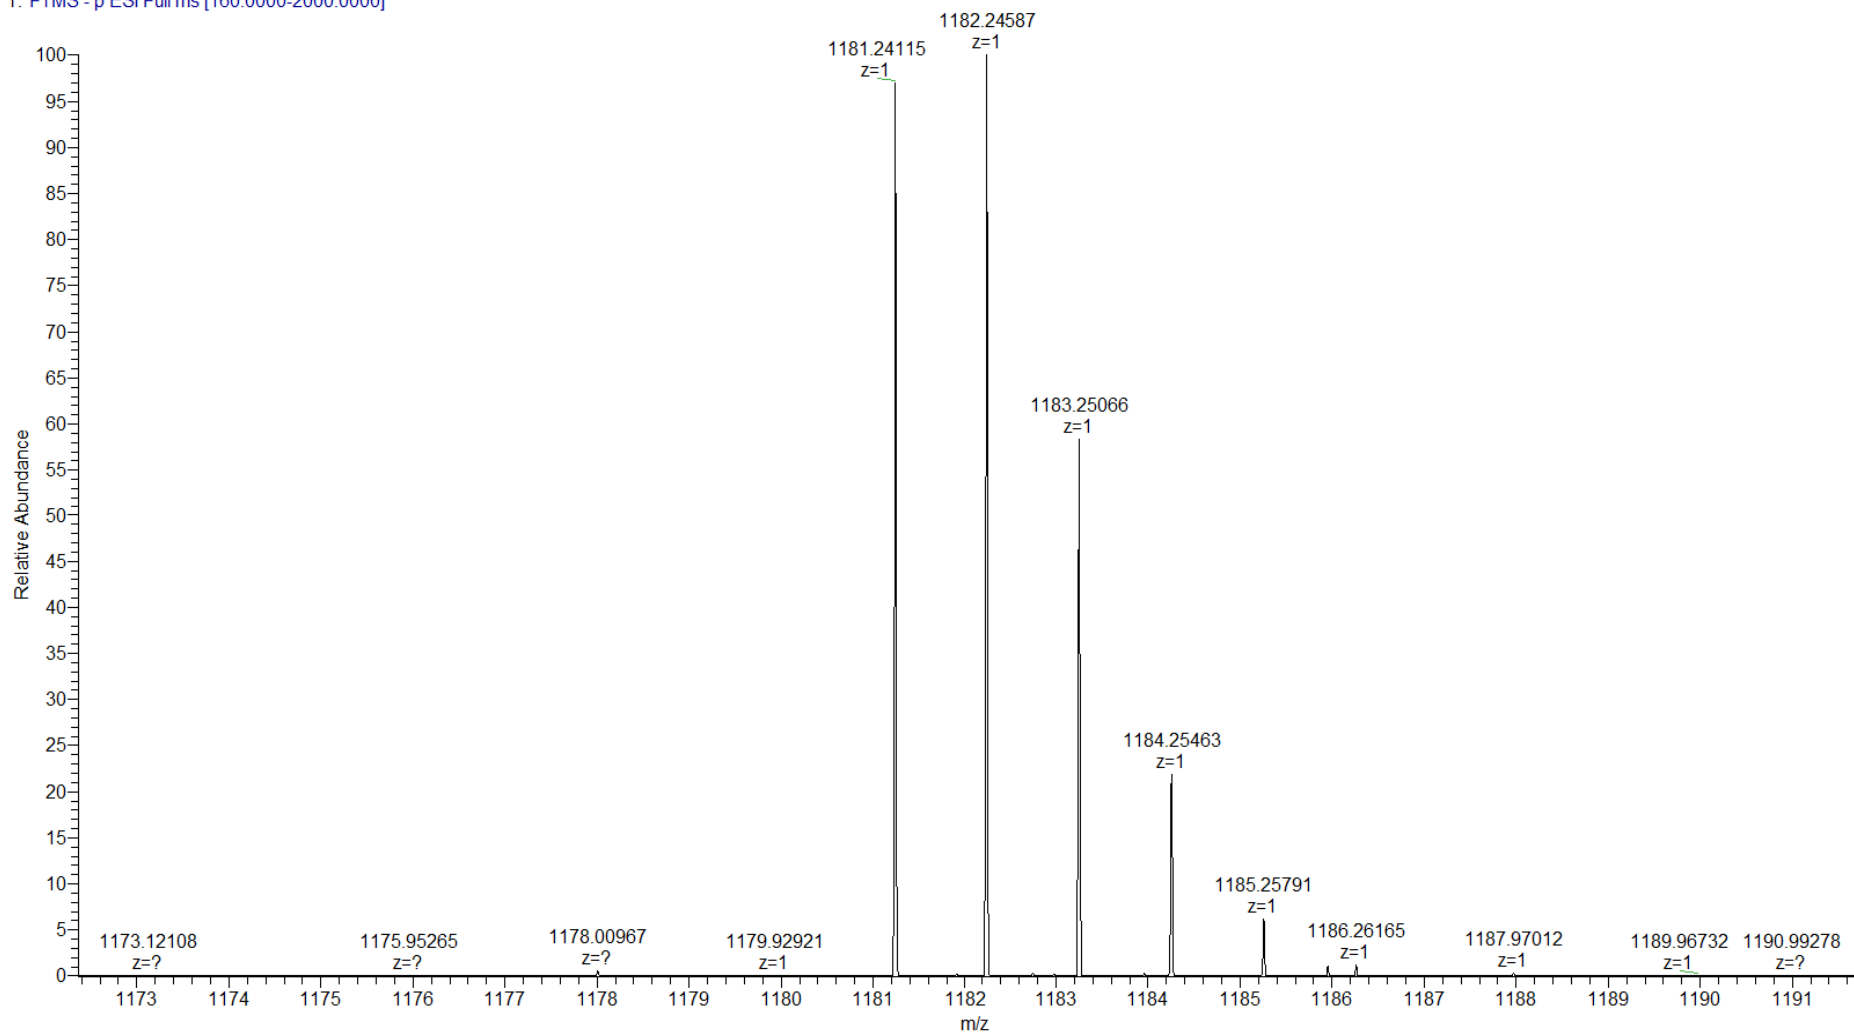

Compound 1b-3': TMGpppG-3'-O-C(O)-NH-CH<sub>2</sub>-CH<sub>2</sub>-triazole-CH<sub>2</sub>-oHBI (NH<sub>4</sub><sup>+</sup> salt)

Chemical structure

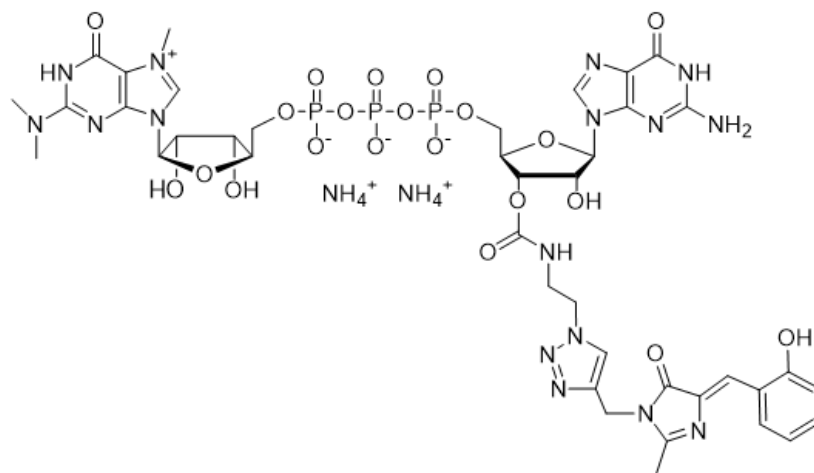

RP-HPLC (conditions b)

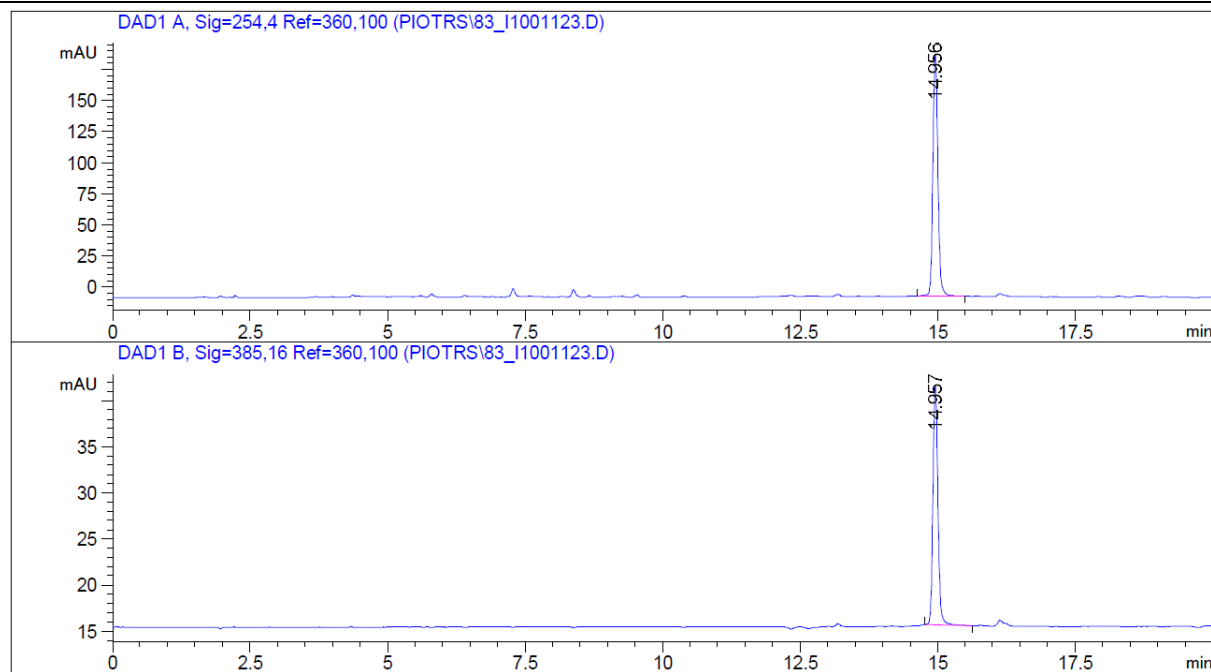

210629\_PSu\_83-12 #20-203 RT: 0.17-1.77 AV: 184 NL: 9.64E4  
T: FTMS - p ESI Full ms [160.0000-2000.0000]

MS (-) ESI (Calc. [M-H]<sup>-</sup> C<sub>40</sub>H<sub>48</sub>N<sub>16</sub>O<sub>21</sub>P<sub>3</sub><sup>-</sup> : 1181.2398, found: 1181.24221)

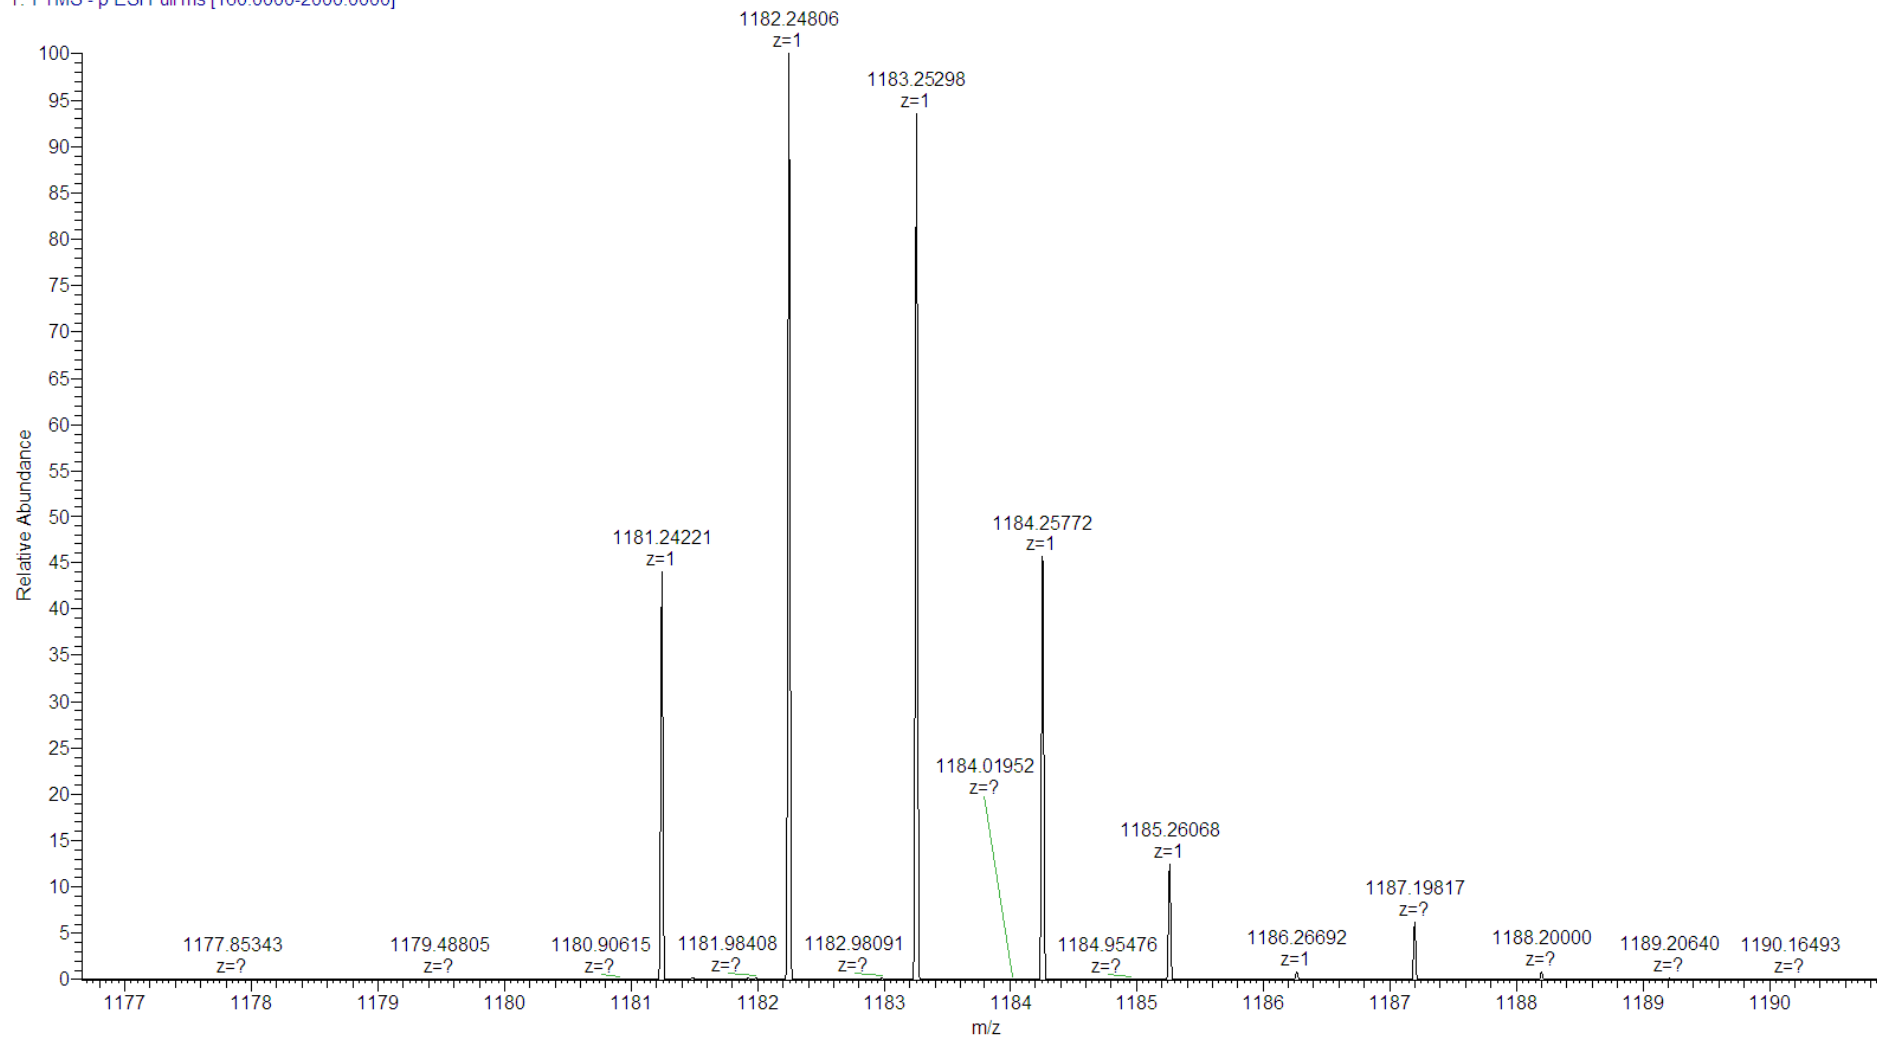

Compound 1c-2': TMGpppG-2'-O-C(O)-NH-CH<sub>2</sub>-CH<sub>2</sub>-triazole-CH<sub>2</sub>-HEMABI (NH<sub>4</sub><sup>+</sup> salt)

Chemical structure

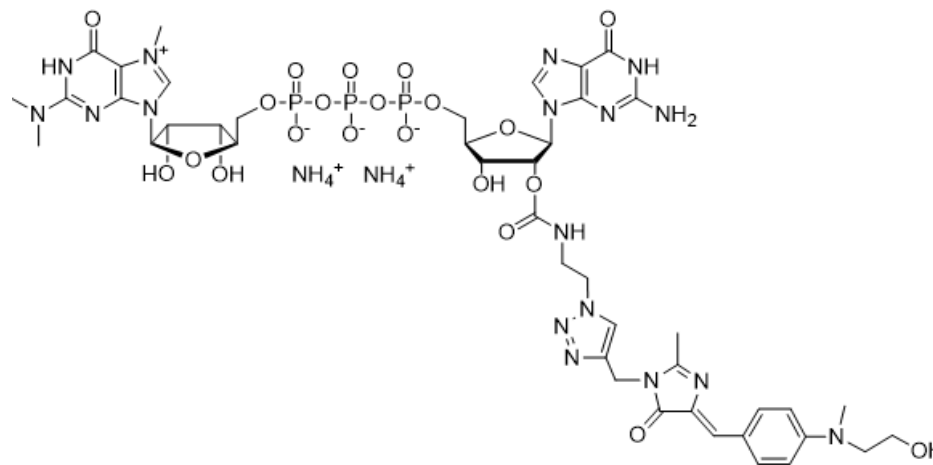

RP-HPLC (conditions c)

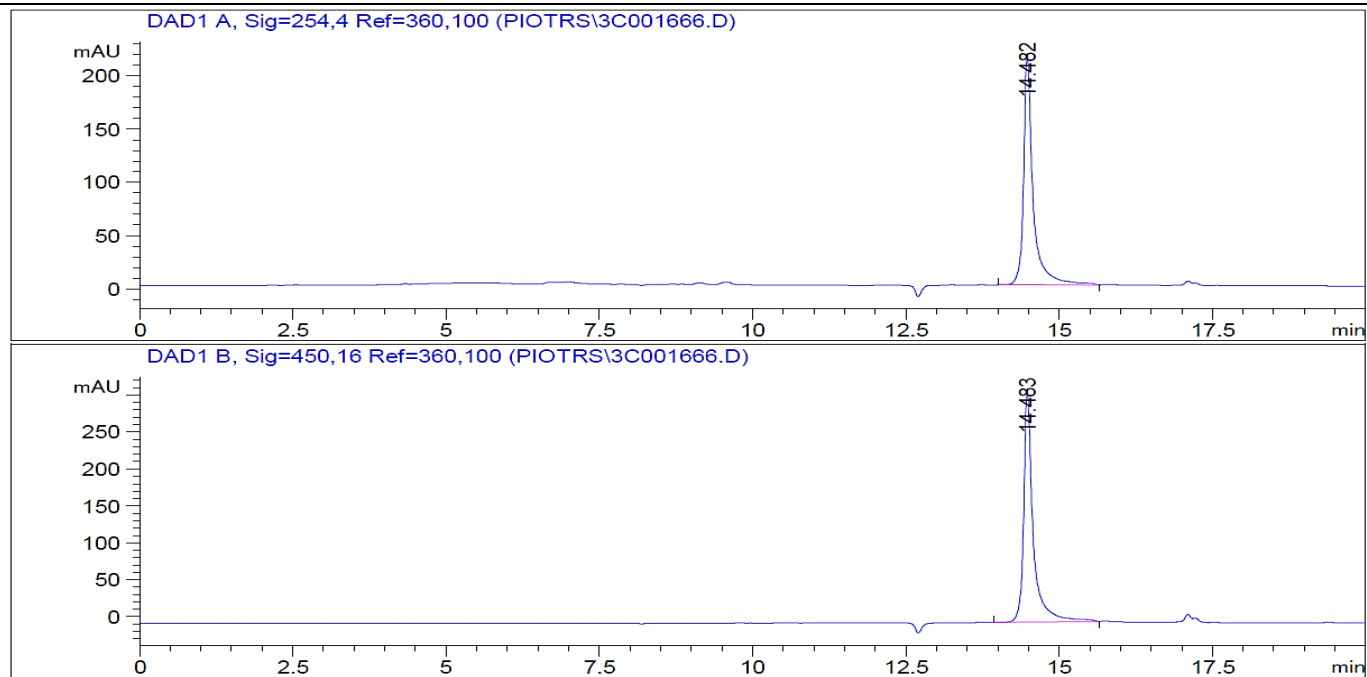

MS (-) ESI (Calc. [M-H]<sup>-</sup> C<sub>43</sub>H<sub>55</sub>N<sub>17</sub>O<sub>21</sub>P<sub>3</sub> : 1238.2977, found: 1238.30060)

191107\_PSu\_26 #133-268 RT: 1.27-2.66 AV: 136 NL: 2.43E5  
T: FTMS - p ESI Full ms [150.0000-2000.0000]

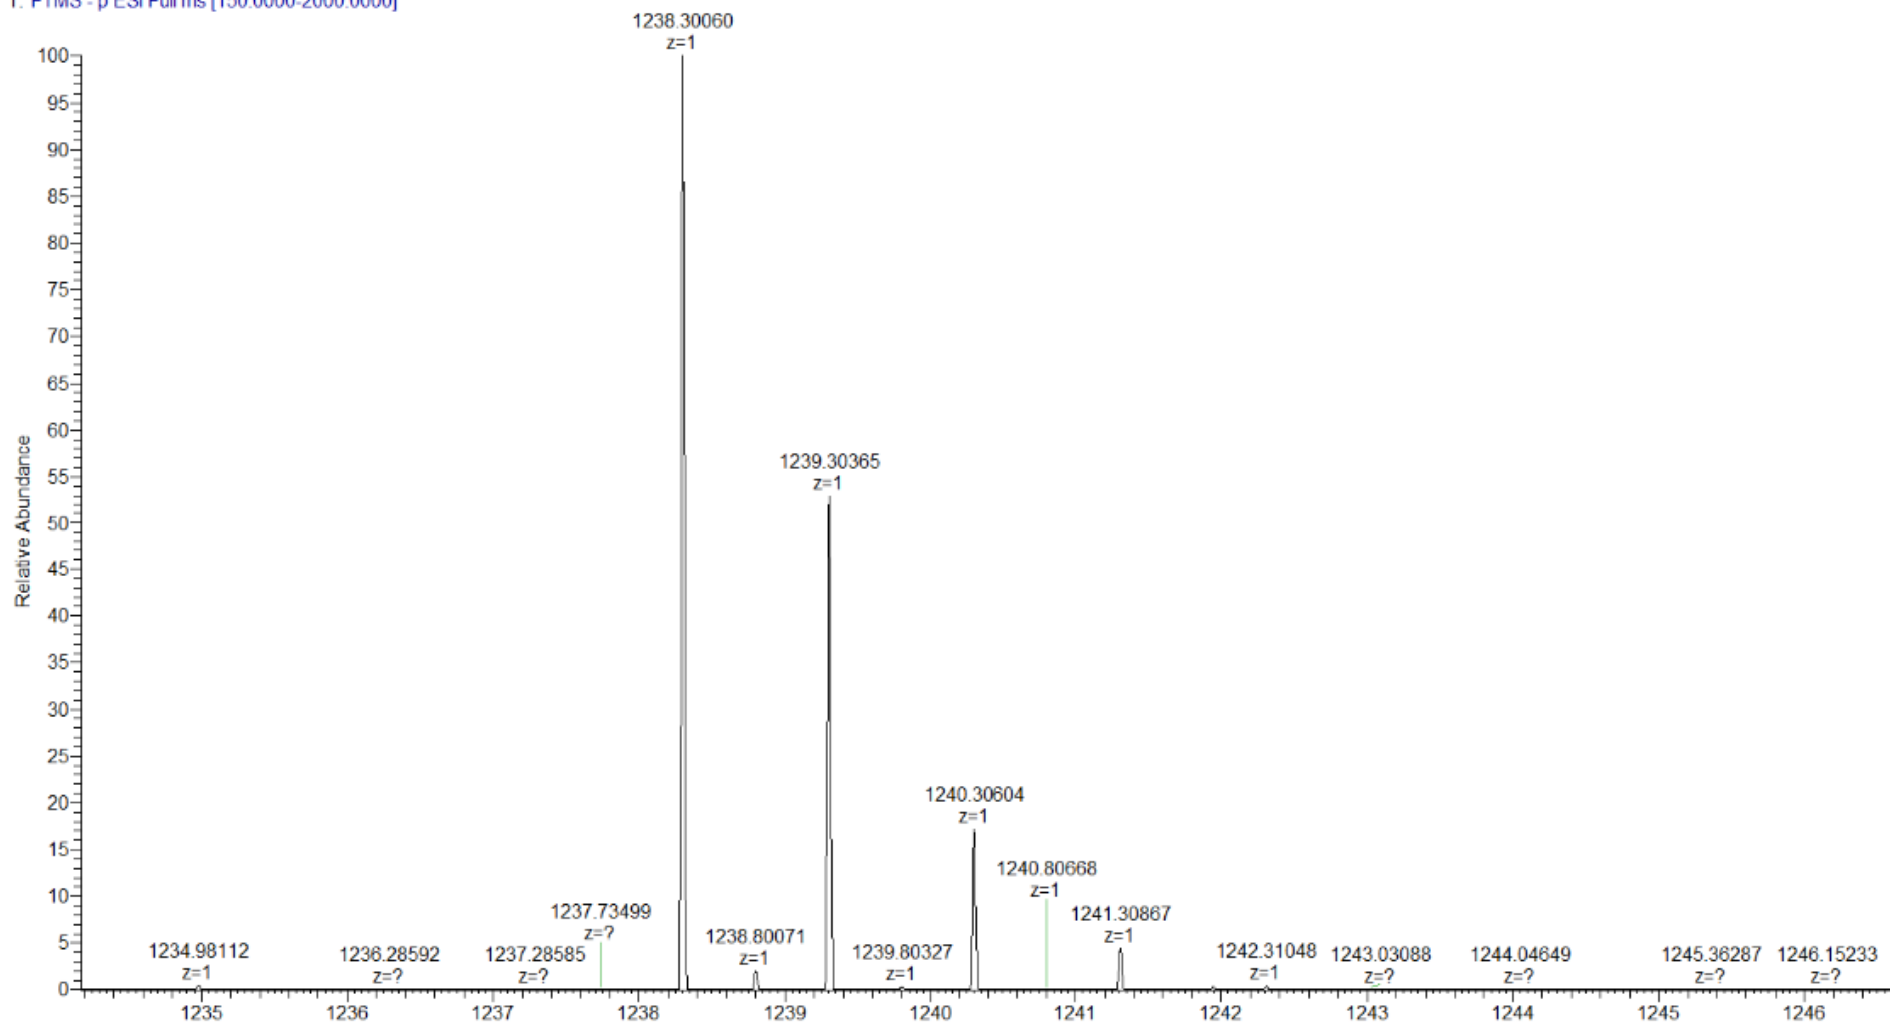

Compound 1c-3': TMGpppG-3'-O-C(O)-NH-CH<sub>2</sub>-CH<sub>2</sub>-triazole-CH<sub>2</sub>-HEMABI (NH<sub>4</sub><sup>+</sup> salt)

Chemical structure

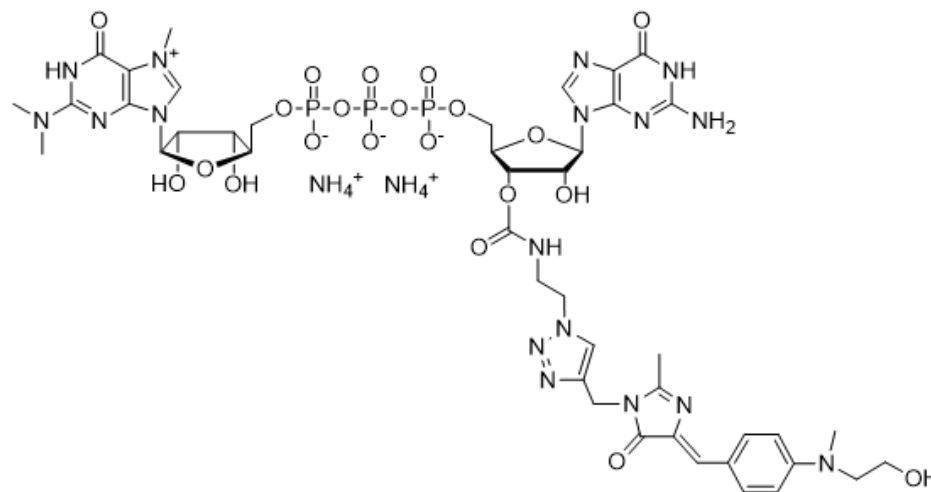

RP-HPLC (conditions c)

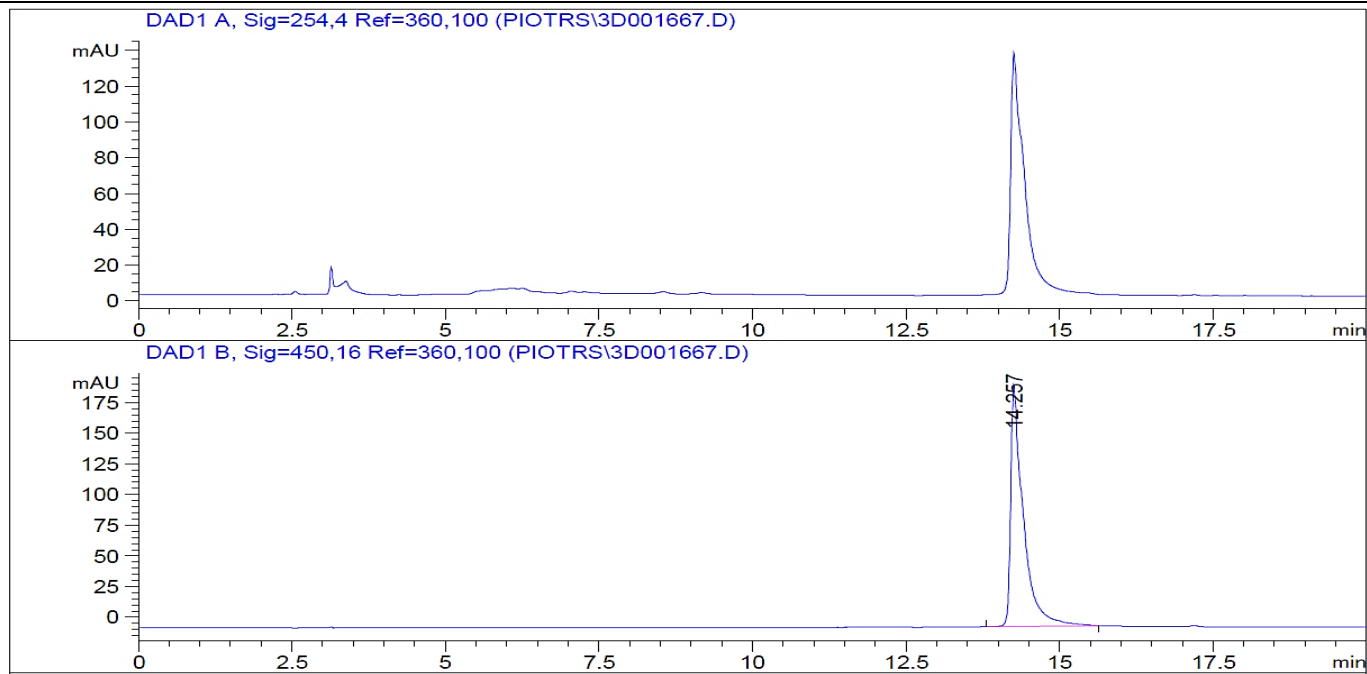

MS (-) ESI (Calc. [M-H]<sup>-</sup> C<sub>43</sub>H<sub>55</sub>N<sub>17</sub>O<sub>21</sub>P<sub>3</sub> : 1238.2977, found: 1238.29981)

191107\_PSu\_27 #2-103 RT: 0.02-1.07 AV: 102 NL: 7.30E5  
T: FTMS - p ESI Full ms [150.0000-2000.0000]

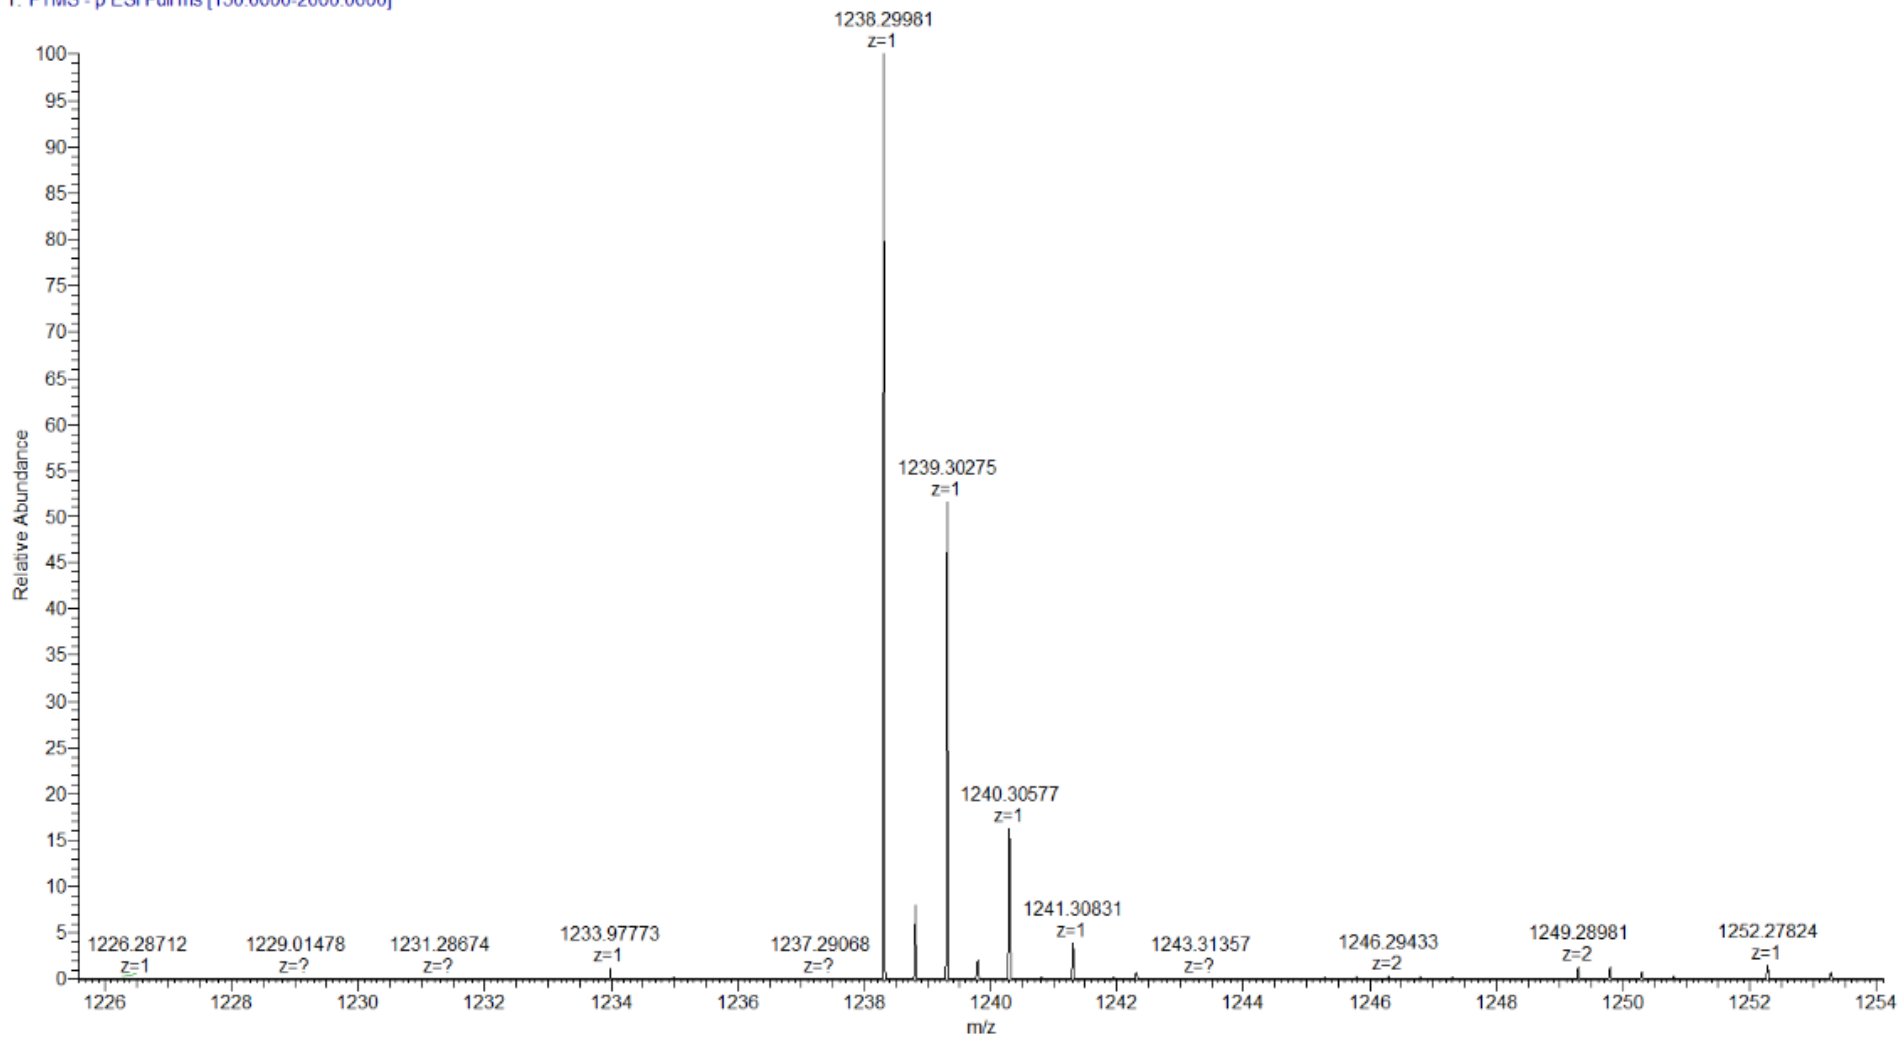



Compound 1d-2': TMGpppG-2'-O-C(O)-NH-CH<sub>2</sub>-CH<sub>2</sub>-triazole-CH<sub>2</sub>-ACVJ (NH<sub>4</sub><sup>+</sup> salt)

Chemical structure

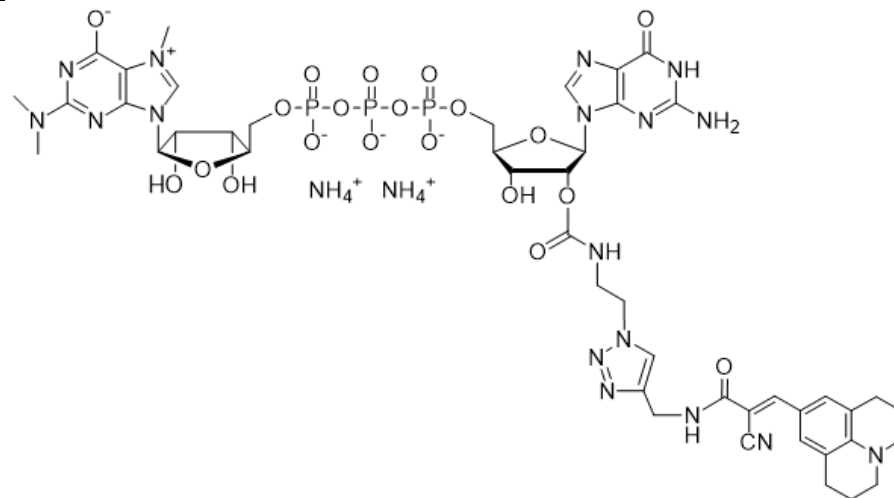

RP-HPLC (conditions b)

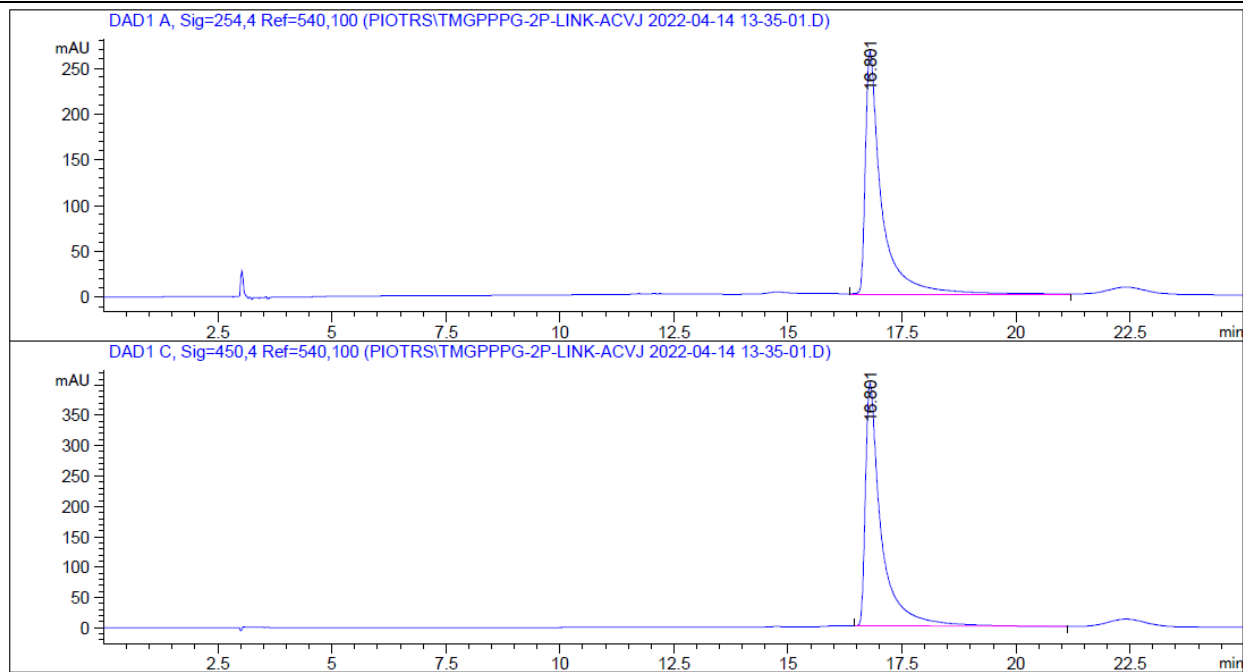

MS (-) ESI (Calc. [M-H]<sup>-</sup> C<sub>45</sub>H<sub>55</sub>N<sub>17</sub>O<sub>20</sub>P<sub>3</sub><sup>-</sup> : 1246.3028, found: 1246.30607)

191107\_PSu\_28 #166-321 RT: 1.59-3.13 AV: 156 NL: 2.27E5  
T: FTMS - p ESI Full ms [150.0000-2000.0000]

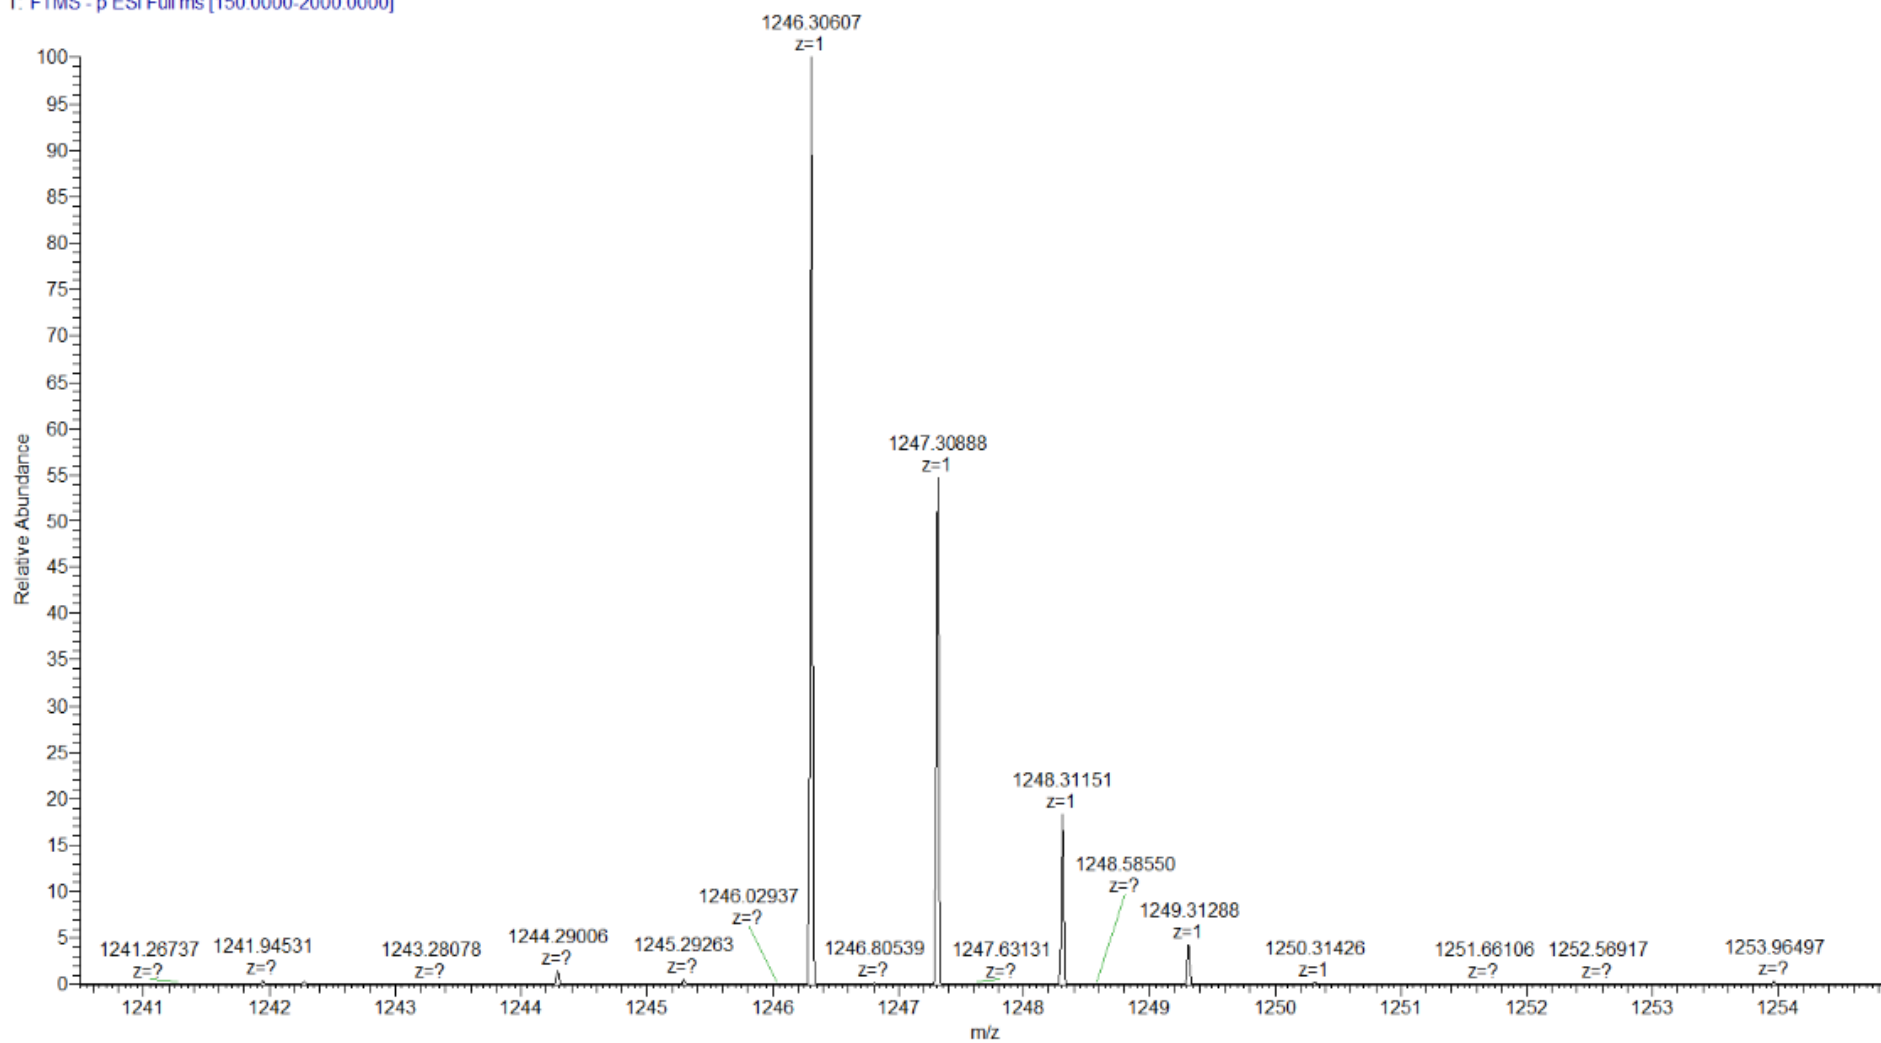

Compound 1d-3': TMGpppG-3'-O-C(O)-NH-CH<sub>2</sub>-CH<sub>2</sub>-triazole-CH<sub>2</sub>-ACVJ (NH<sub>4</sub><sup>+</sup> salt)

Chemical structure

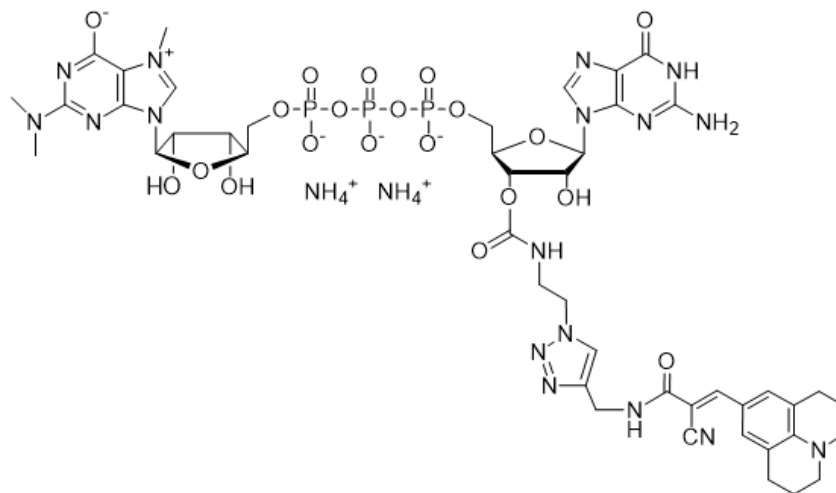

RP-HPLC (conditions b)

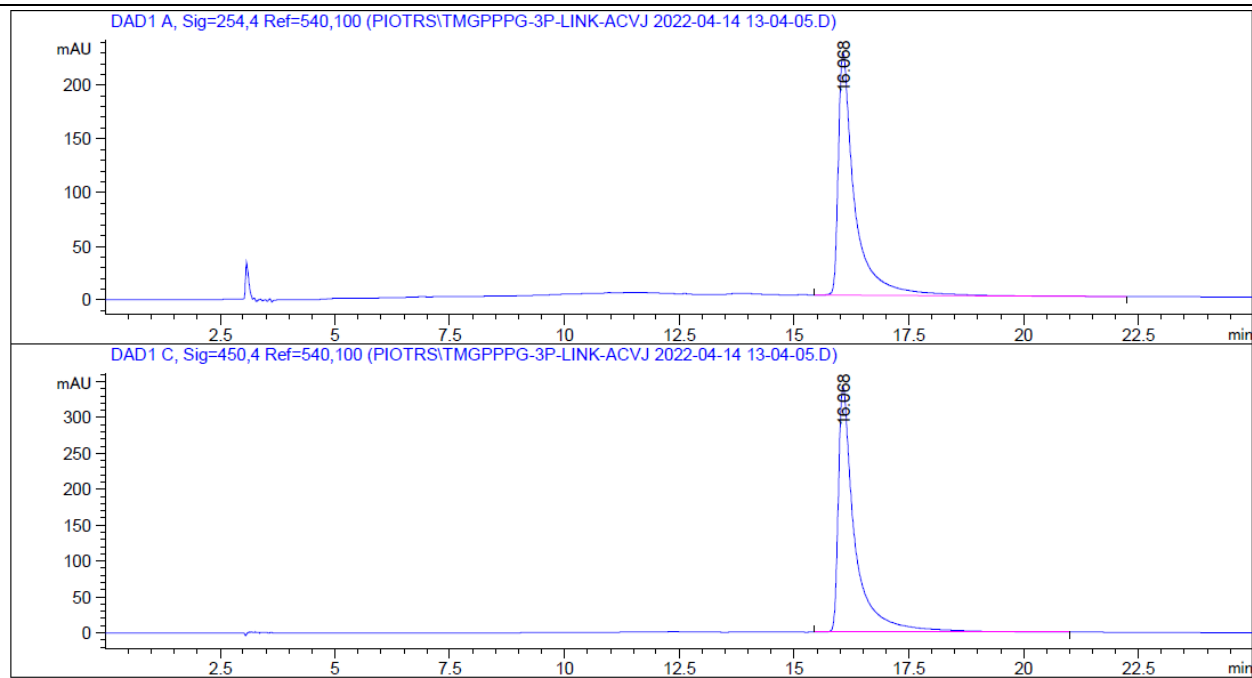

MS (-) ESI (Calc. [M-H]<sup>-</sup> C<sub>45</sub>H<sub>55</sub>N<sub>17</sub>O<sub>20</sub>P<sub>3</sub> : 1246.3028, found: 1246.30393)

220407\_PSu\_03 #59-87 RT: 0.53-0.77 AV: 29 NL: 5.91E6  
T: FTMS - p ESI Full ms [160.0000-2000.0000]

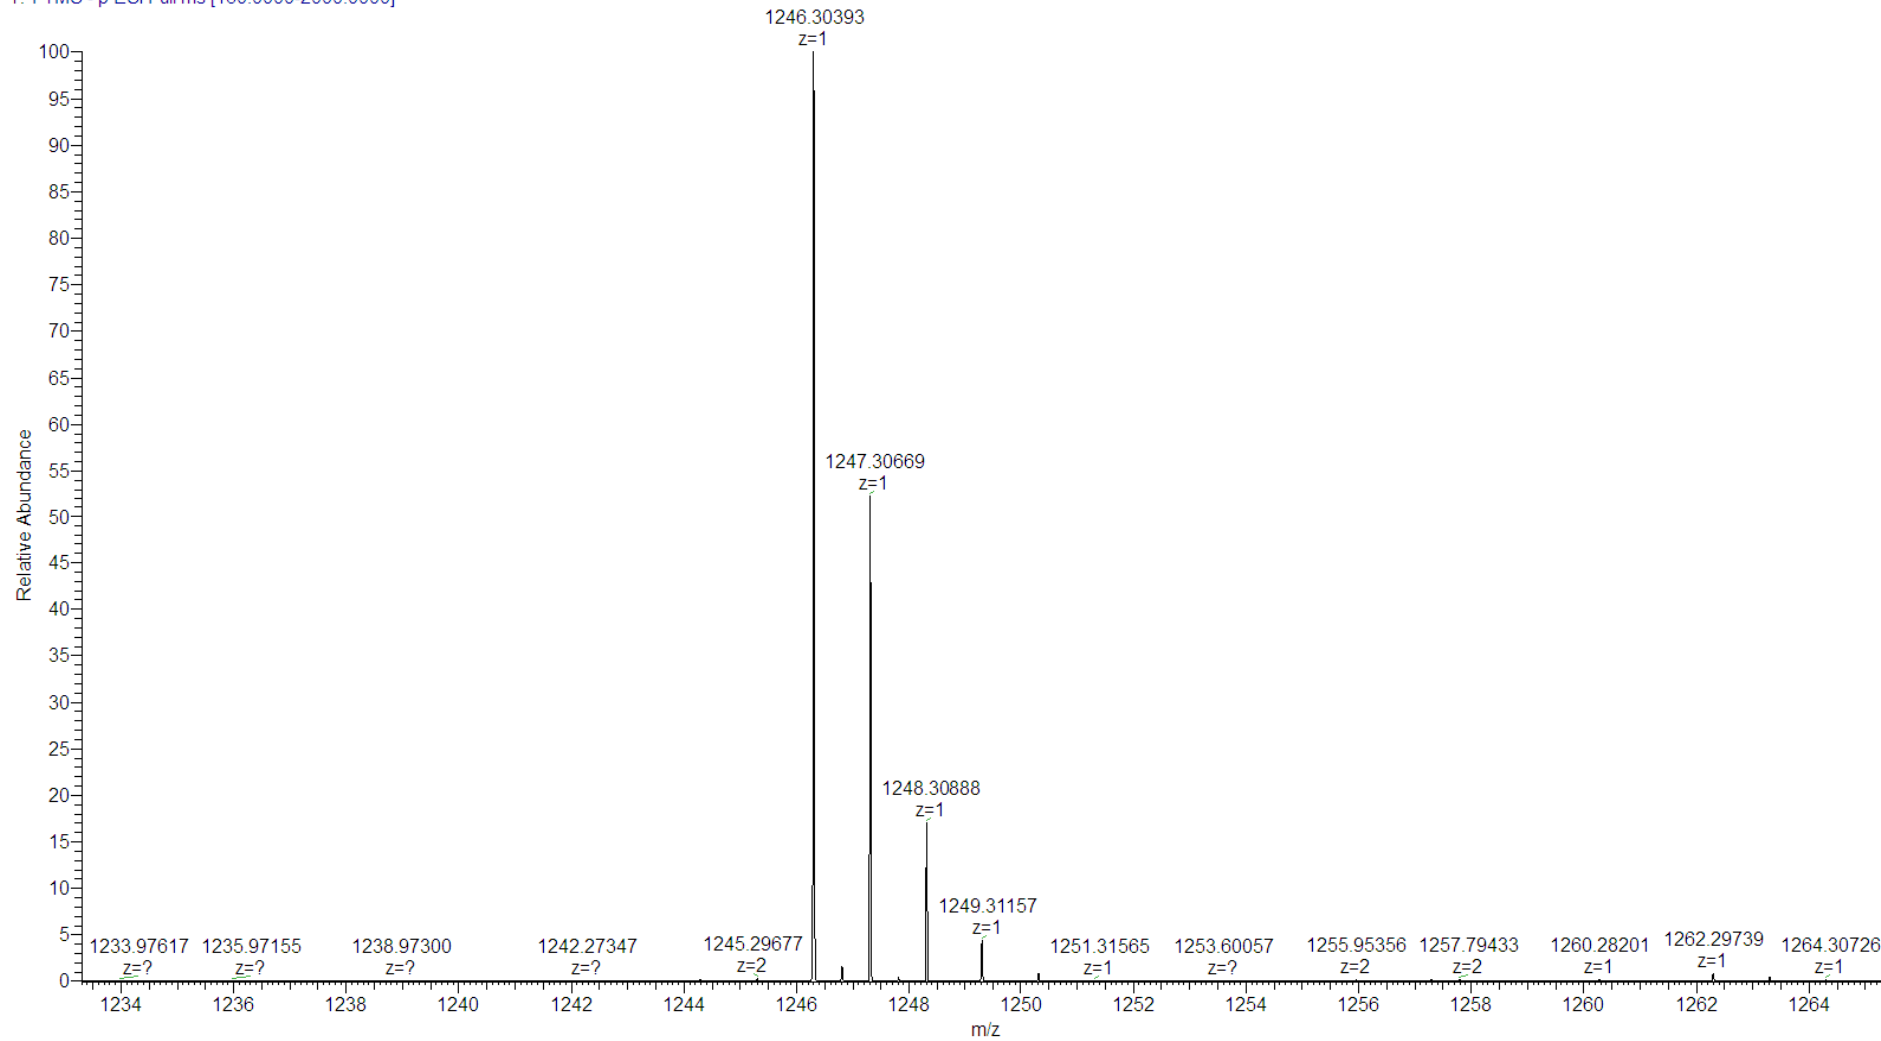

Compound 2a-2': TMG-5'-SpppG-2'-O-C(O)-NH-CH<sub>2</sub>-CH<sub>2</sub>-triazole-CH<sub>2</sub>-DMHBI (NH<sub>4</sub><sup>+</sup> salt)

Chemical structure

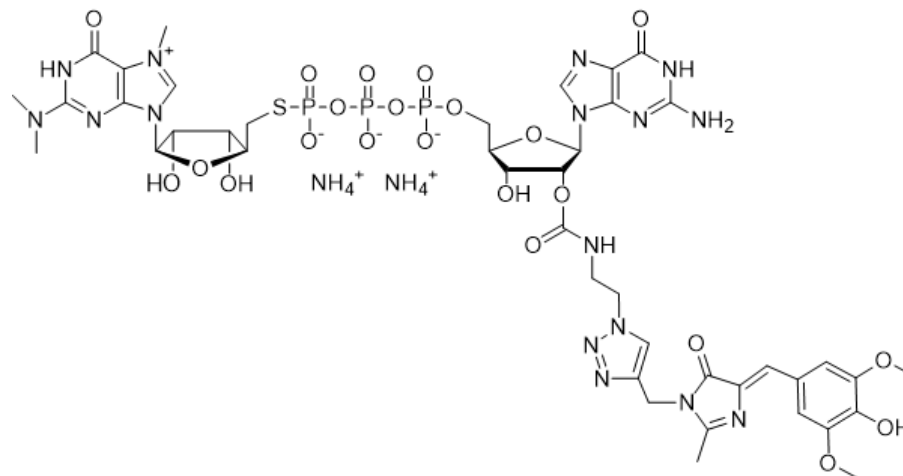

RP-HPLC (conditions c)

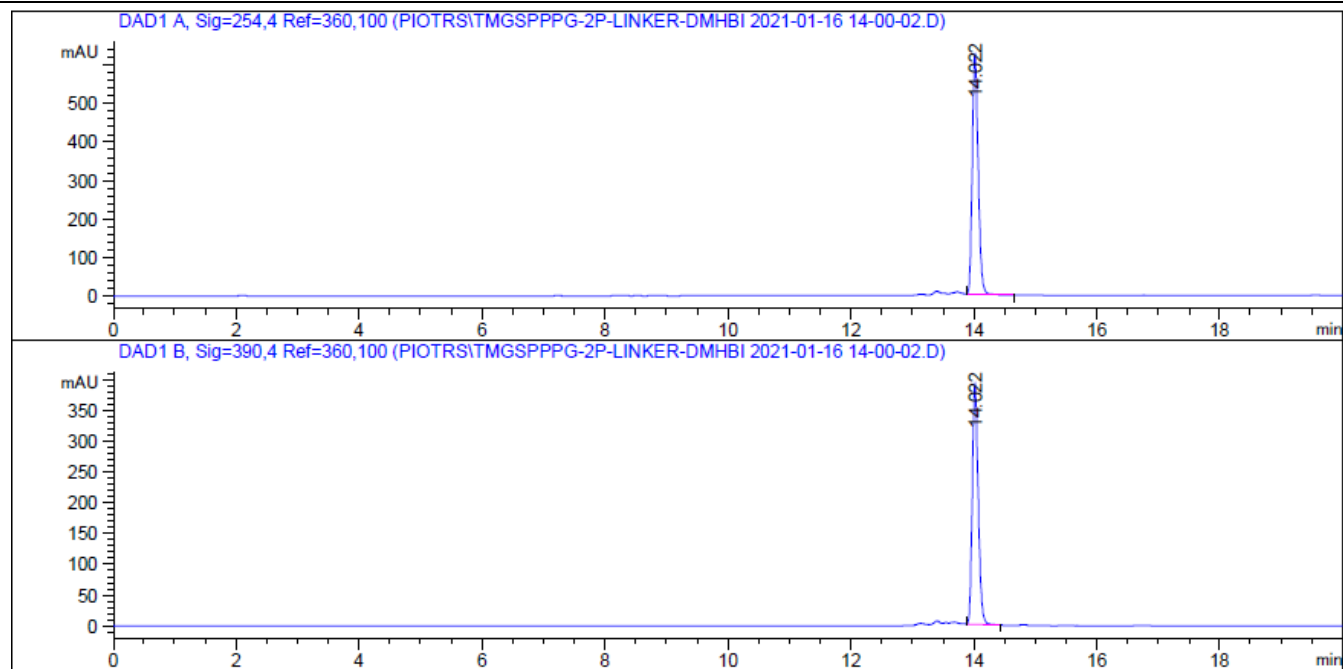

210629\_PSu\_6a #115-207 RT: 1.00-1.81 AV: 93 NL: 6.22E5  
T: FTMS - p ESI Full ms [160.0000-2000.0000]

MS (-) ESI (Calc. [M-H]<sup>-</sup> C<sub>42</sub>H<sub>52</sub>N<sub>16</sub>O<sub>22</sub>P<sub>3</sub>S<sub>3</sub> : 1257.23811, 1257.23929)

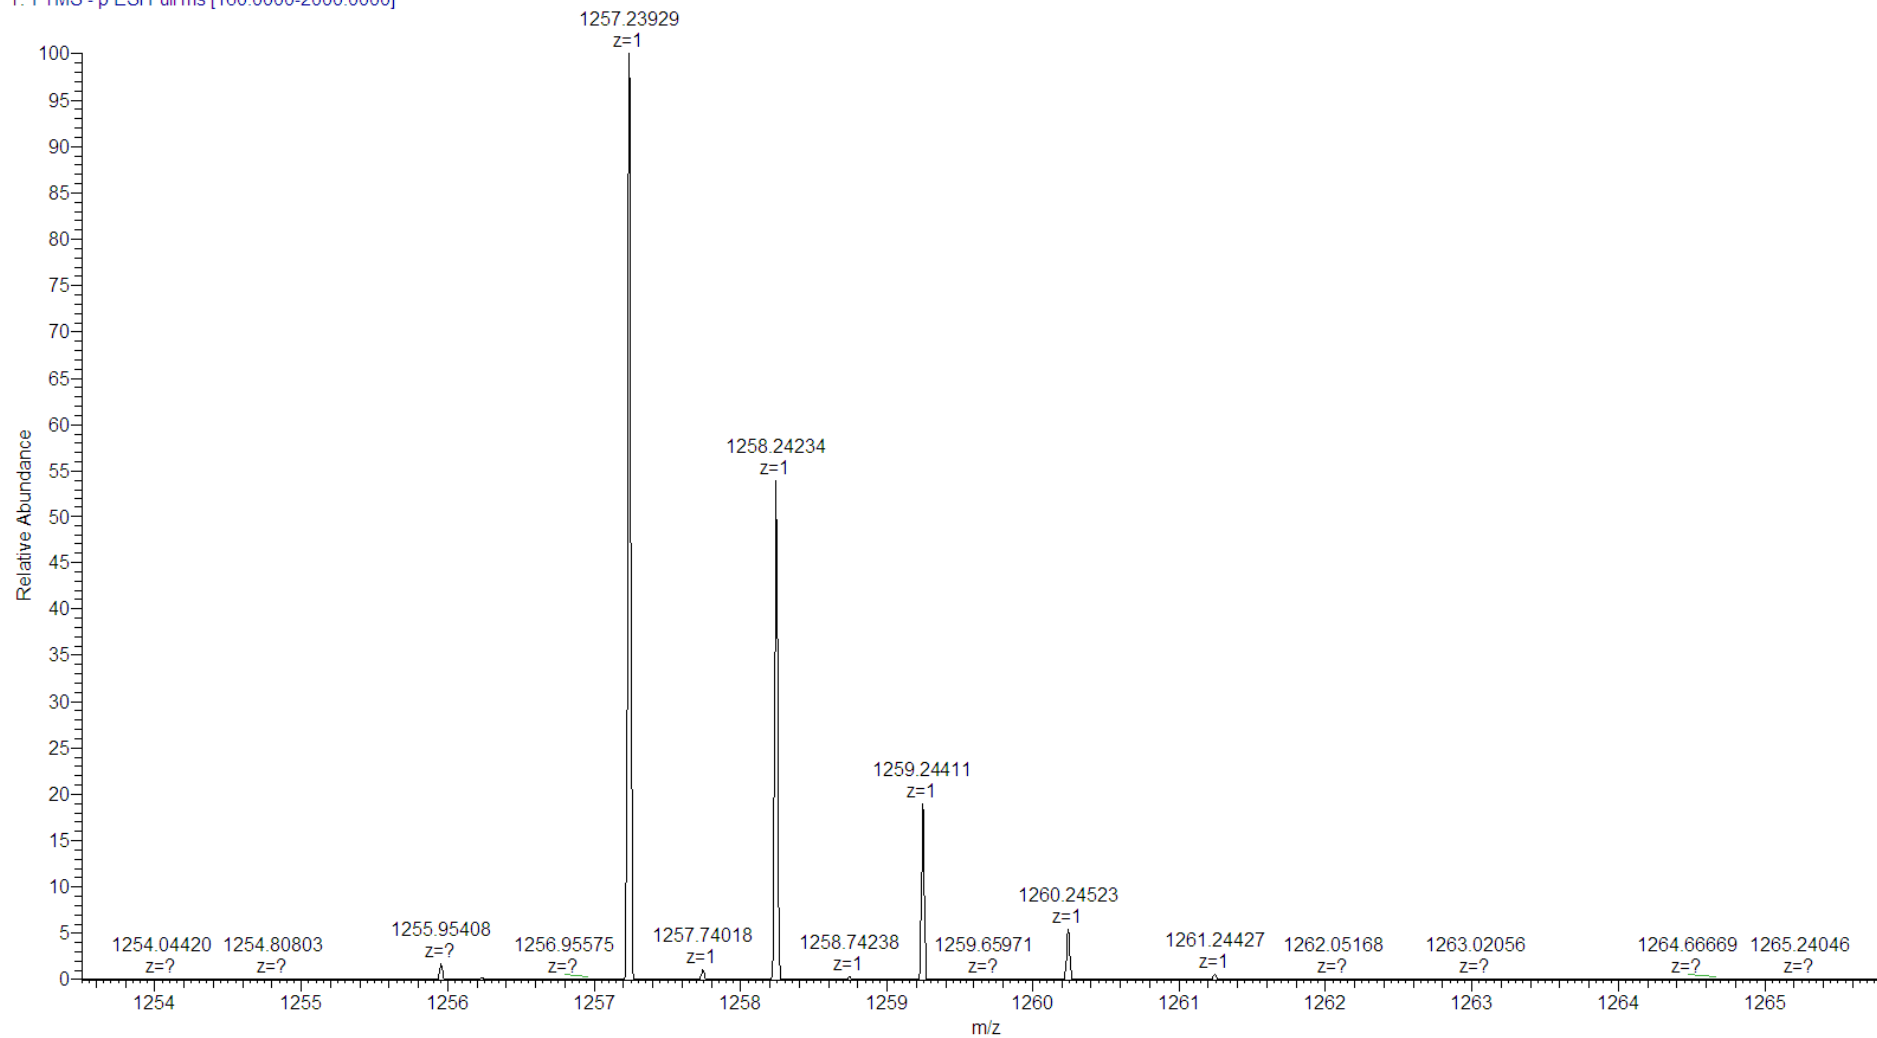

Compound 2a-3': TMG-5'-SpppG-3'-O-C(O)-NH-CH<sub>2</sub>-CH<sub>2</sub>-triazole-CH<sub>2</sub>-DMHBI (NH<sub>4</sub><sup>+</sup> salt)

Chemical structure

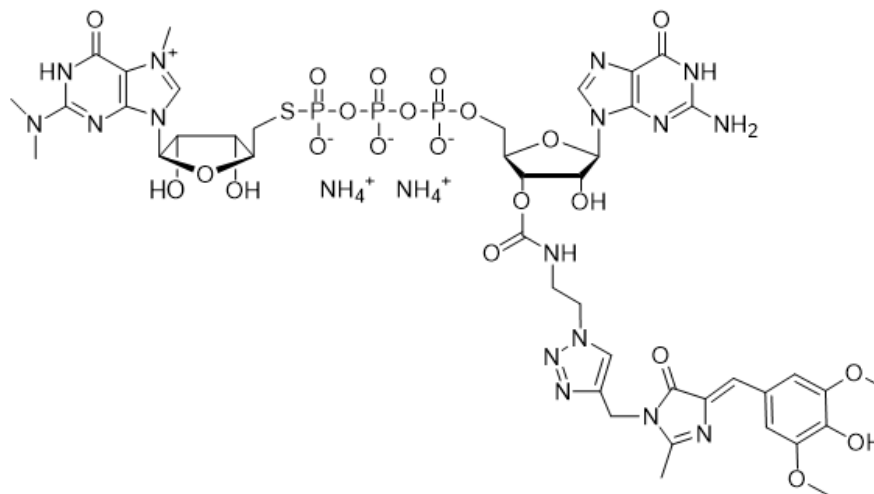

RP-HPLC (conditions c)

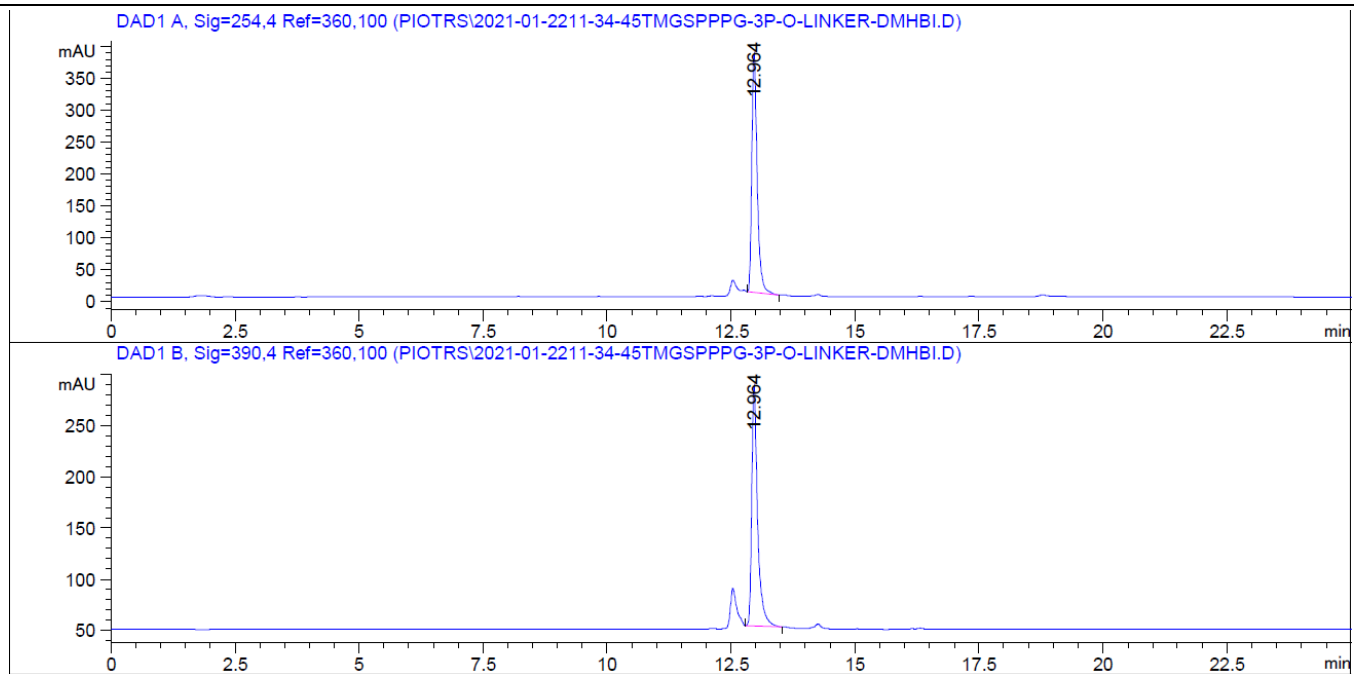

210629\_PSu\_6b #23-103 RT: 0.20-0.90 AV: 81 NL: 4.30E5  
T: FTMS - p ESI Full ms [160.0000-2000.0000]

MS (-) ESI (Calc. [M-H]<sup>-</sup> C<sub>42</sub>H<sub>52</sub>N<sub>16</sub>O<sub>22</sub>P<sub>3</sub>S<sup>-</sup> : 1257.23811, found: 1257.23982)

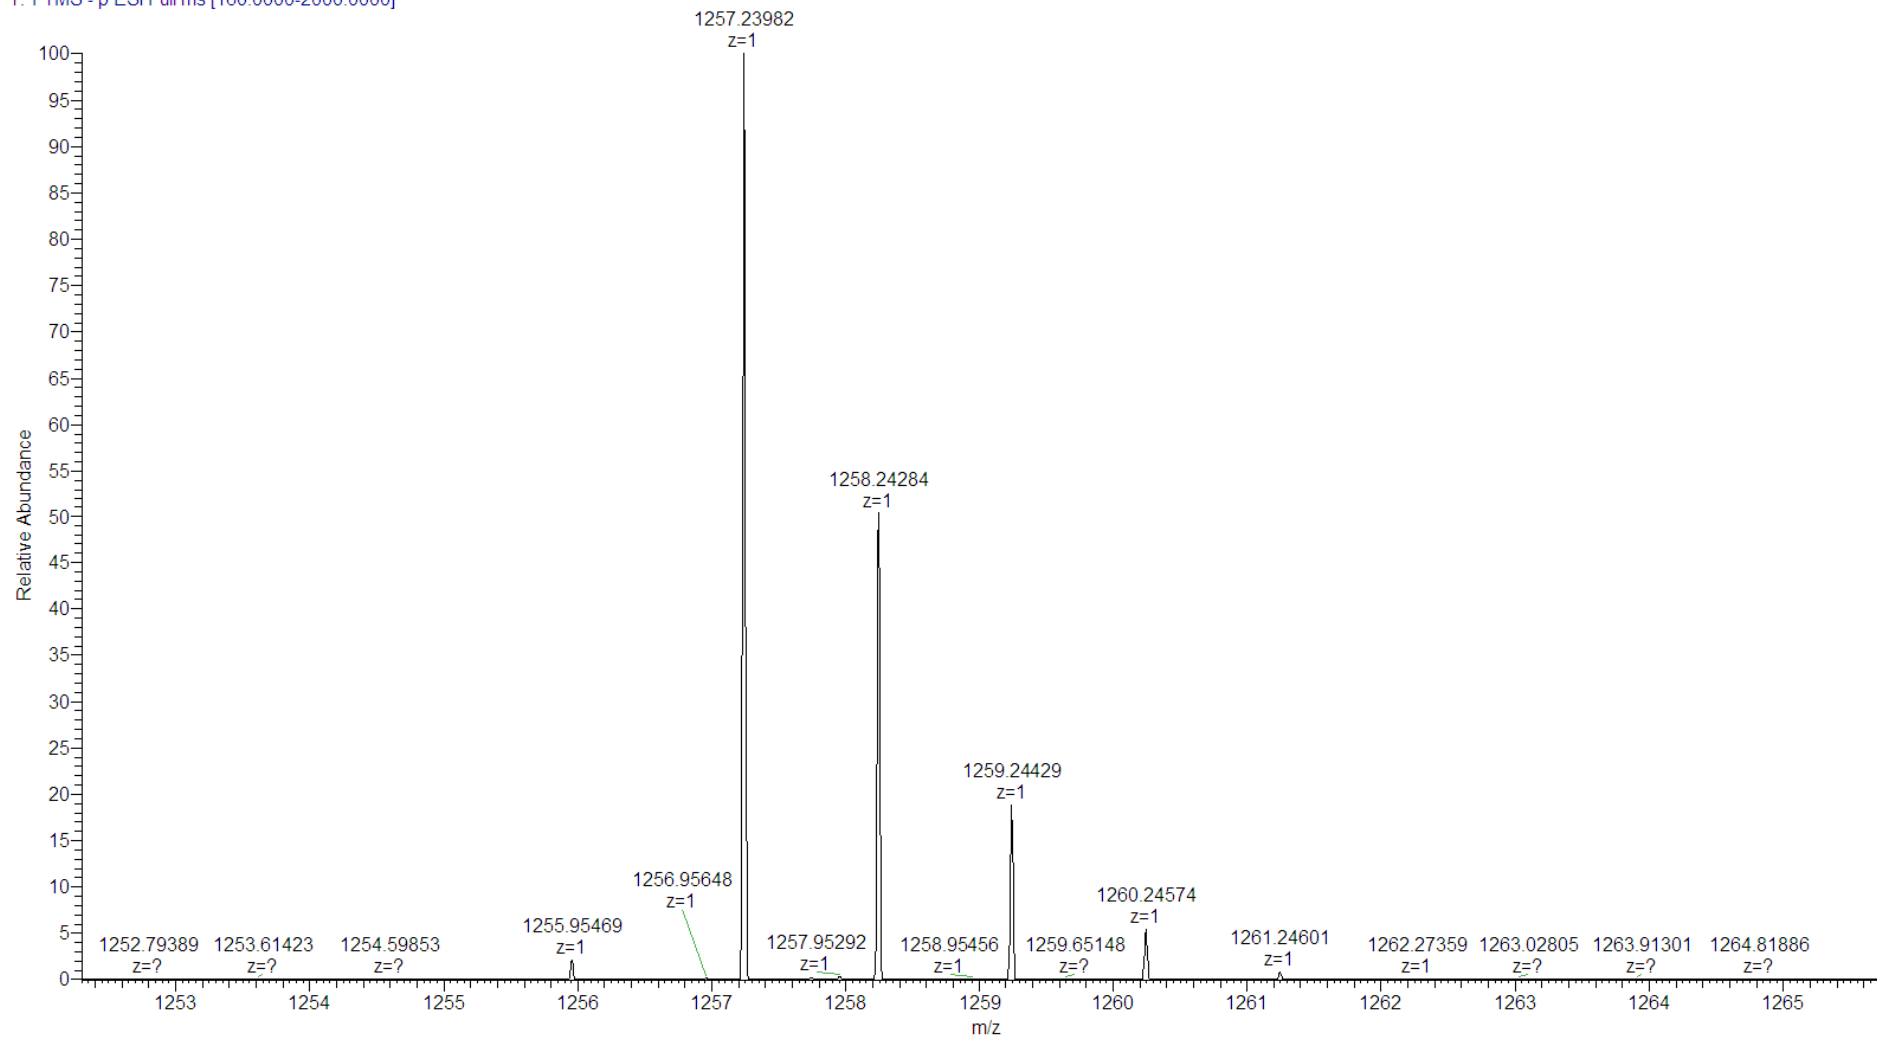



Compound 3a-2': TMGppCH<sub>2</sub>pG-2'-O-C(O)-NH-CH<sub>2</sub>-CH<sub>2</sub>-triazole-CH<sub>2</sub>-DMHBI (NH<sub>4</sub><sup>+</sup> salt)

Chemical structure

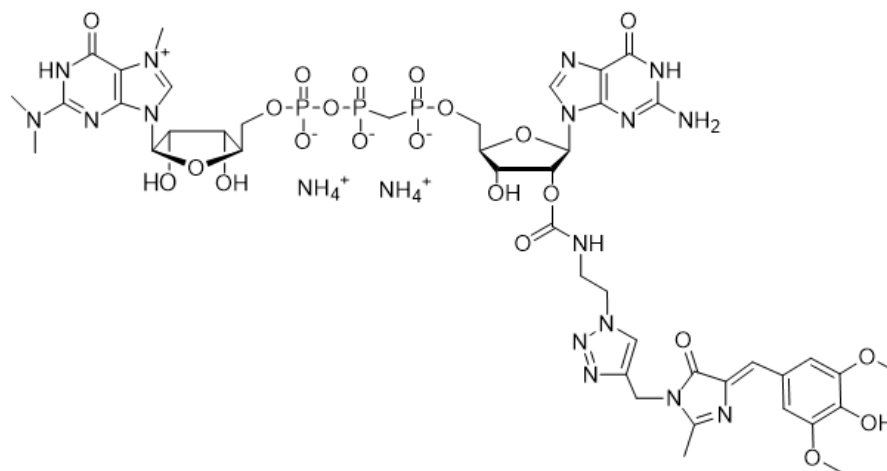

RP-HPLC (conditions c)

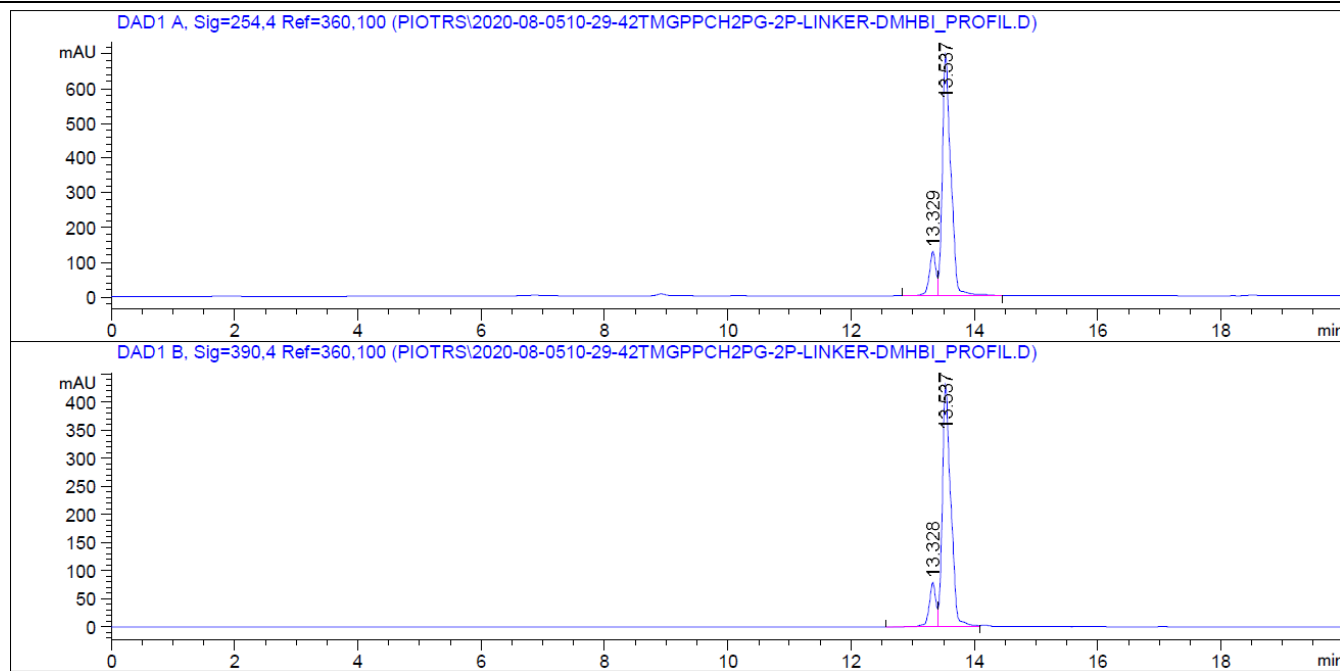

MS (-) ESI (Calc. [M-H]<sup>-</sup> C<sub>43</sub>H<sub>54</sub>N<sub>16</sub>O<sub>22</sub>P<sub>3</sub> : 1239.2817, found: 1239.28185)

200812\_PSu\_01 #10-124 RT: 0.10-1.26 AV: 115 NL: 2.78E5  
T: FTMS - p ESI Full ms [150.0000-2000.0000]

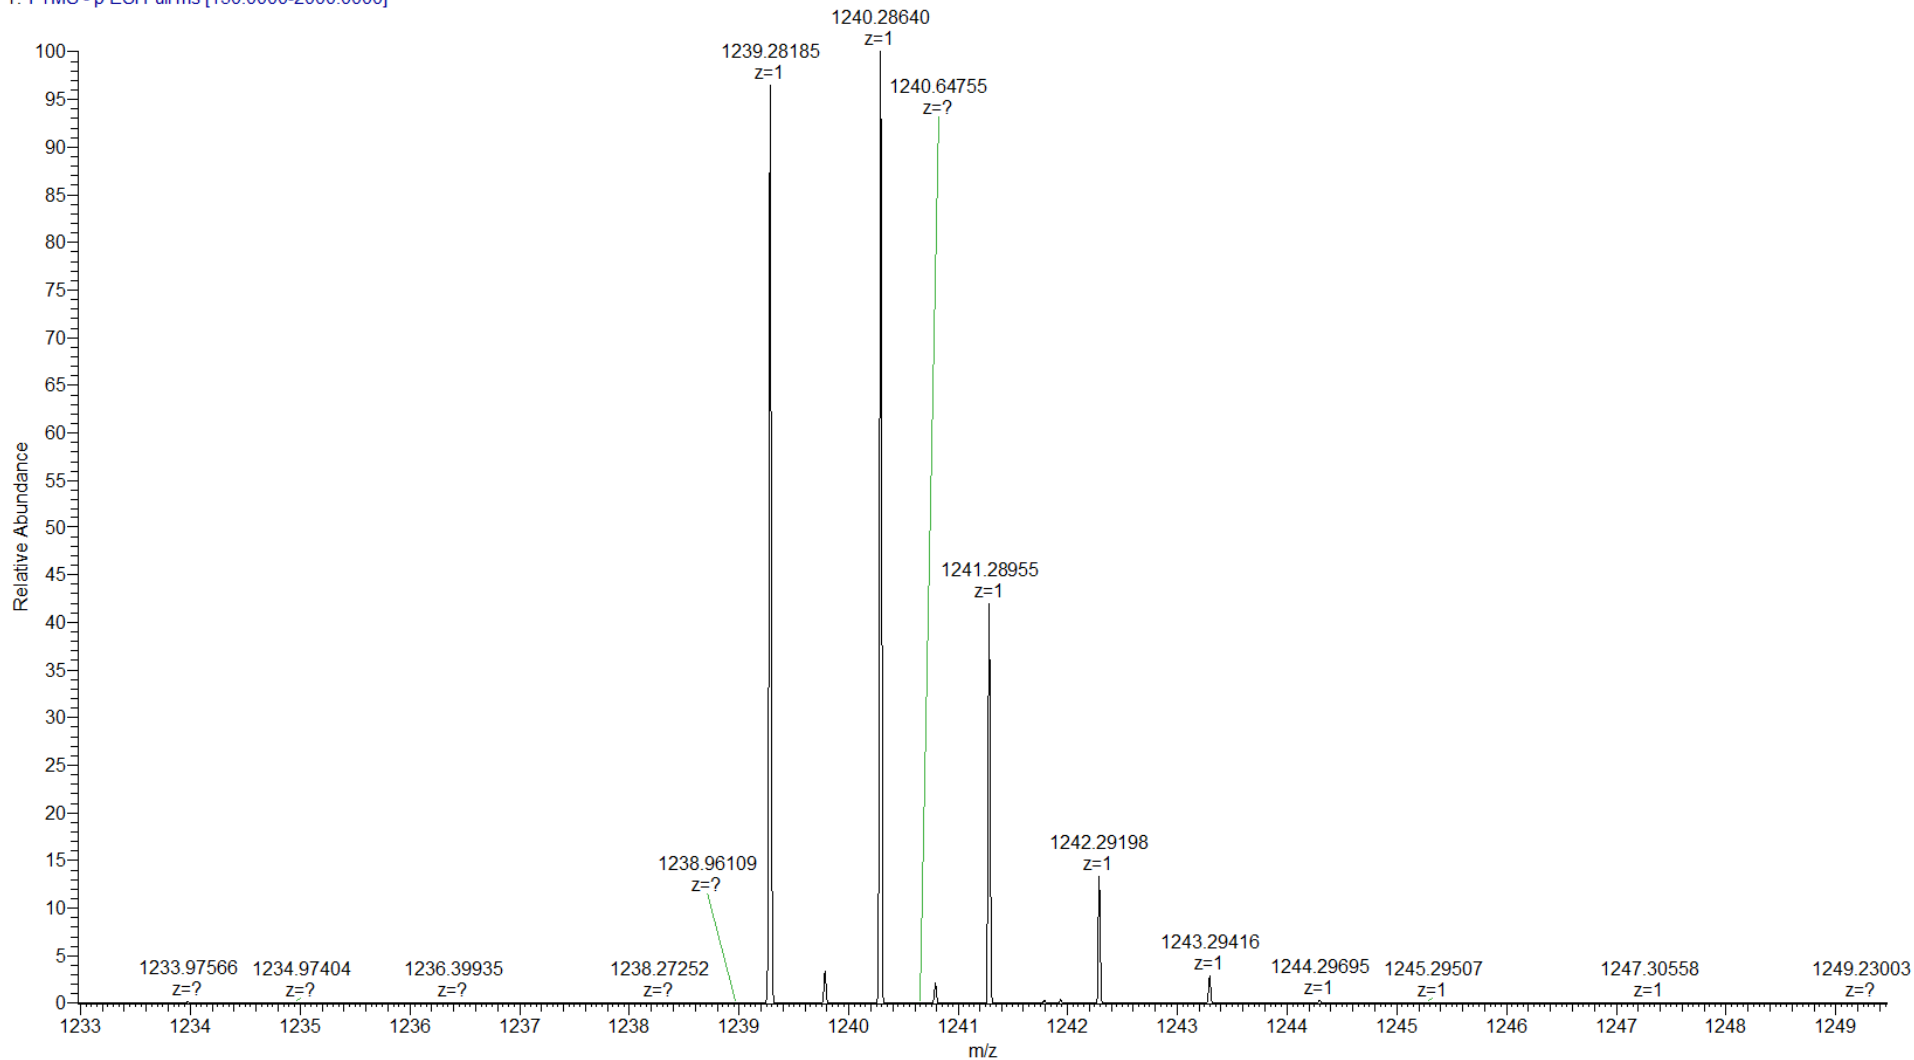

Compound 3a-3': TMGppCH<sub>2</sub>pG-3'-O-C(O)-NH-CH<sub>2</sub>-CH<sub>2</sub>-triazole-CH<sub>2</sub>-DMHBI (NH<sub>4</sub><sup>+</sup> salt)

Chemical structure

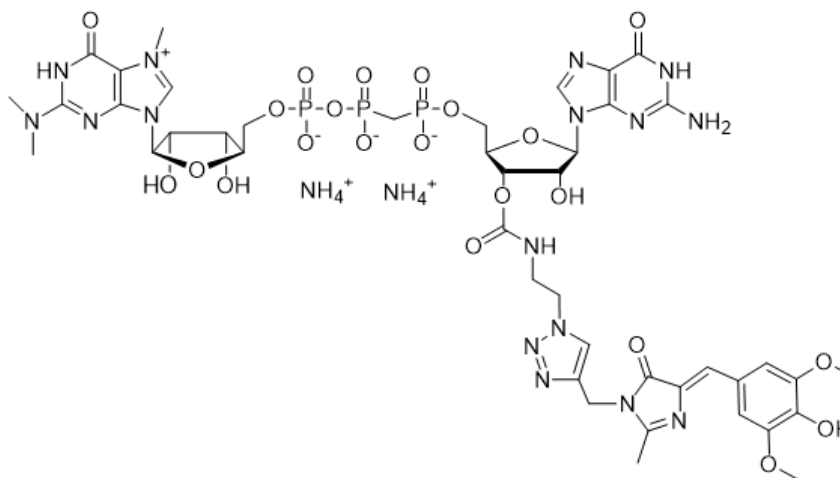

RP-HPLC (conditions c)

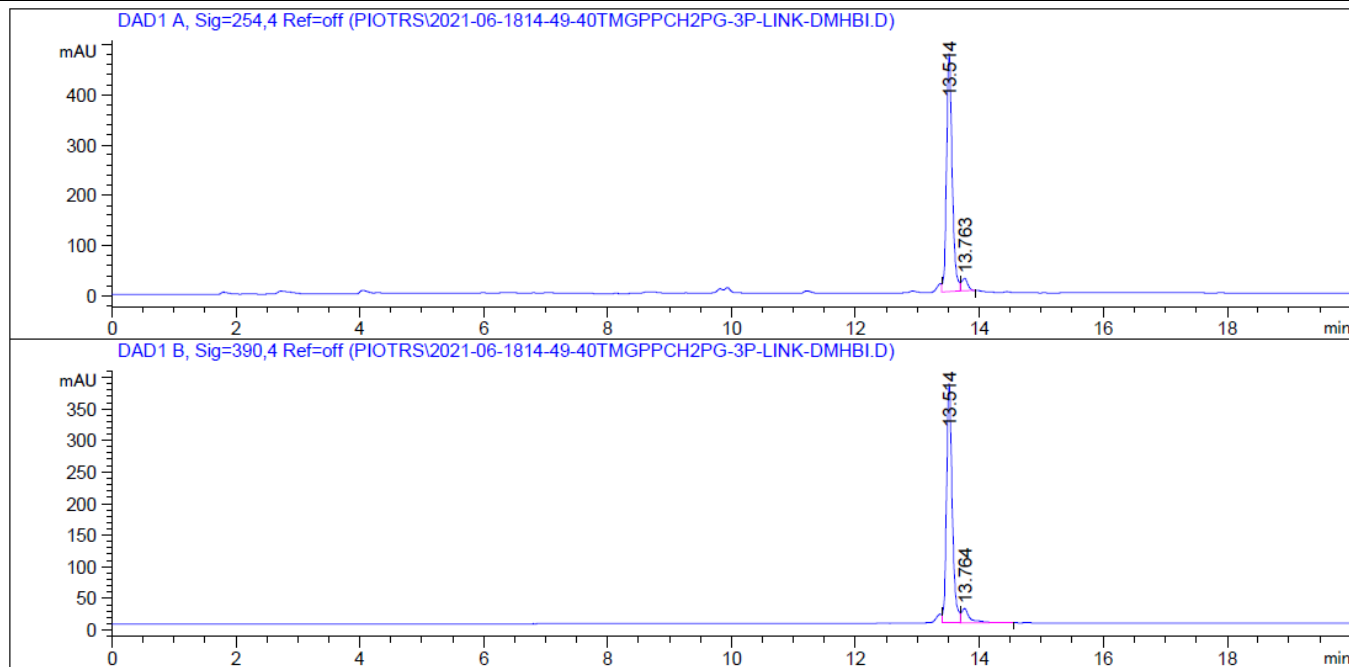

MS (-) ESI (Calc. [M-H]<sup>-</sup> C<sub>43</sub>H<sub>54</sub>N<sub>16</sub>O<sub>22</sub>P<sub>3</sub> : 1239.2817, found: 1239.28228)

200812\_PSu\_02#122-198 RT: 1.24-1.99 AV: 77 NL: 5.48E4  
T: FTMS - p ESI Full ms [150.0000-2000.0000]

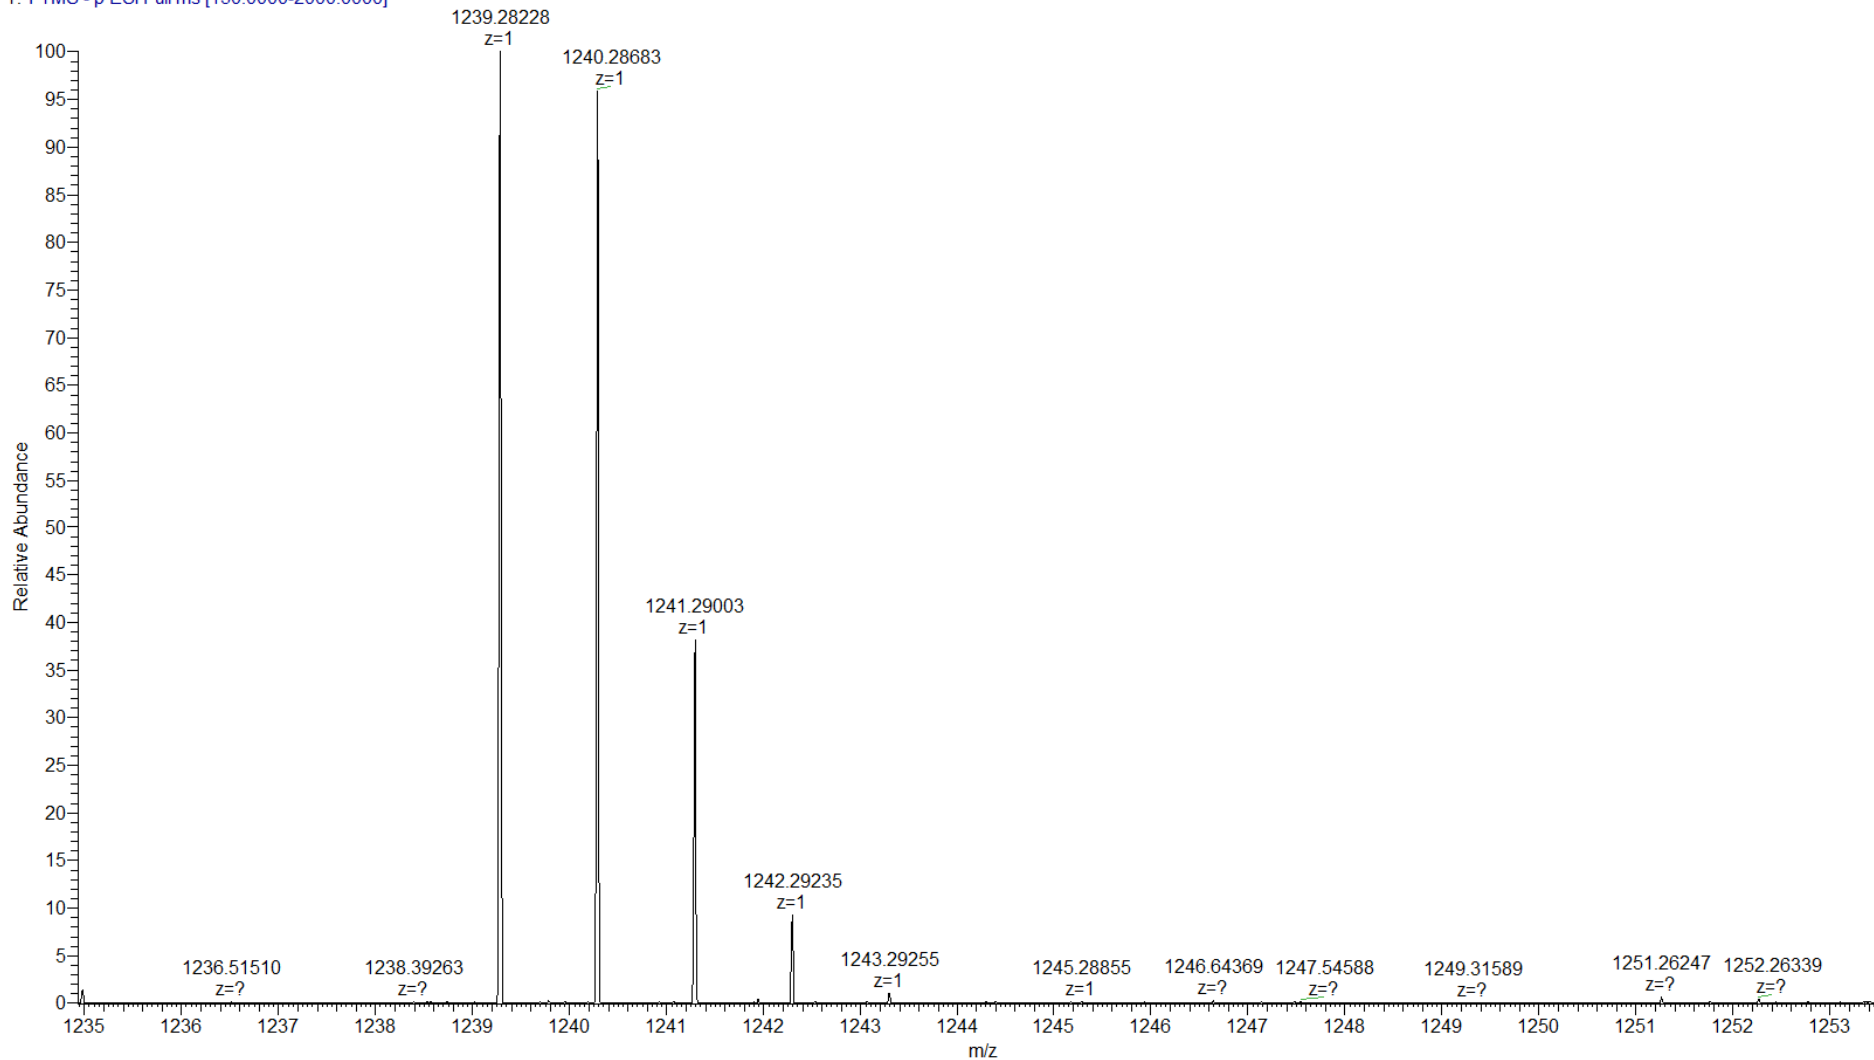

Compound 3c-2': TMGppCH<sub>2</sub>pG-2'-O-C(O)-NH-CH<sub>2</sub>-CH<sub>2</sub>-triazole-CH<sub>2</sub>-HEMABI (NH<sub>4</sub><sup>+</sup> salt)

Chemical structure

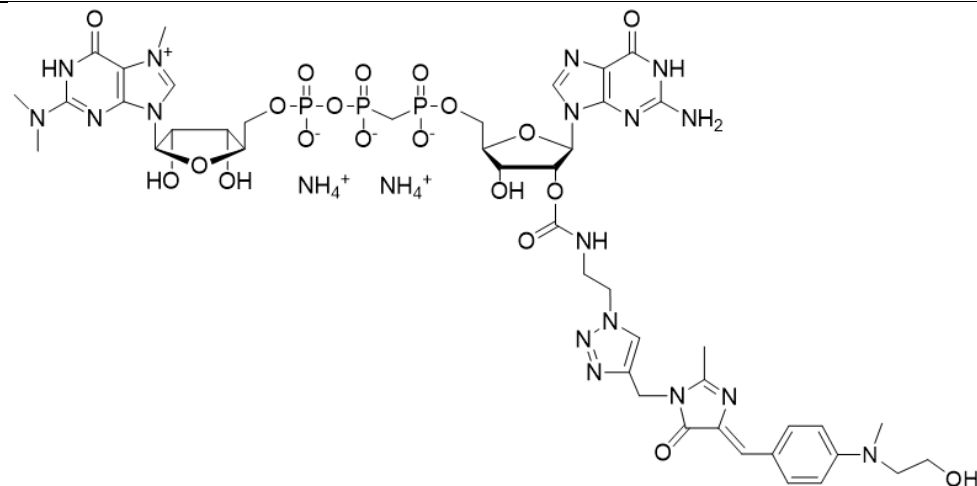

RP-HPLC (conditions c)

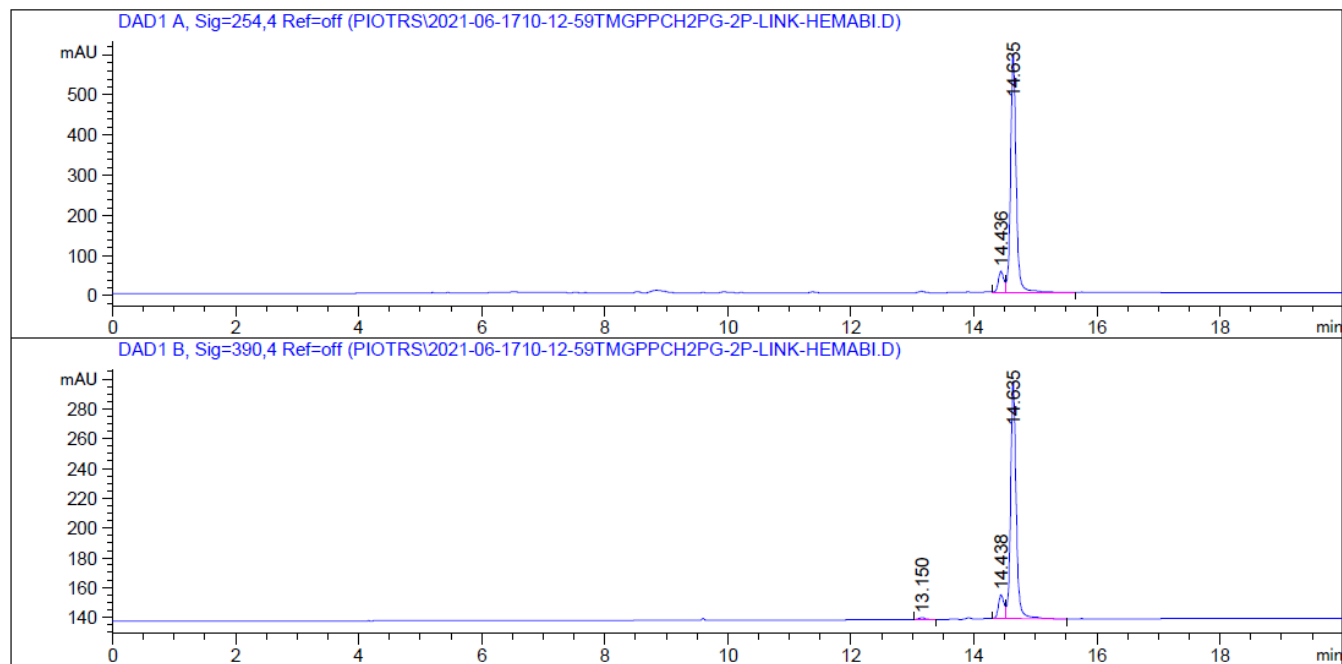

MS (-) ESI (Calc. [M-H]<sup>-</sup> C<sub>44</sub>H<sub>57</sub>N<sub>17</sub>O<sub>20</sub>P<sub>3</sub> : 1236.3184, found: 1236.31914)

200812\_PSu\_03 #6-102 RT: 0.06-1.00 AV: 97 NL: 1.99E5  
T: FTMS - p ESI Full ms [150.0000-2000.0000]

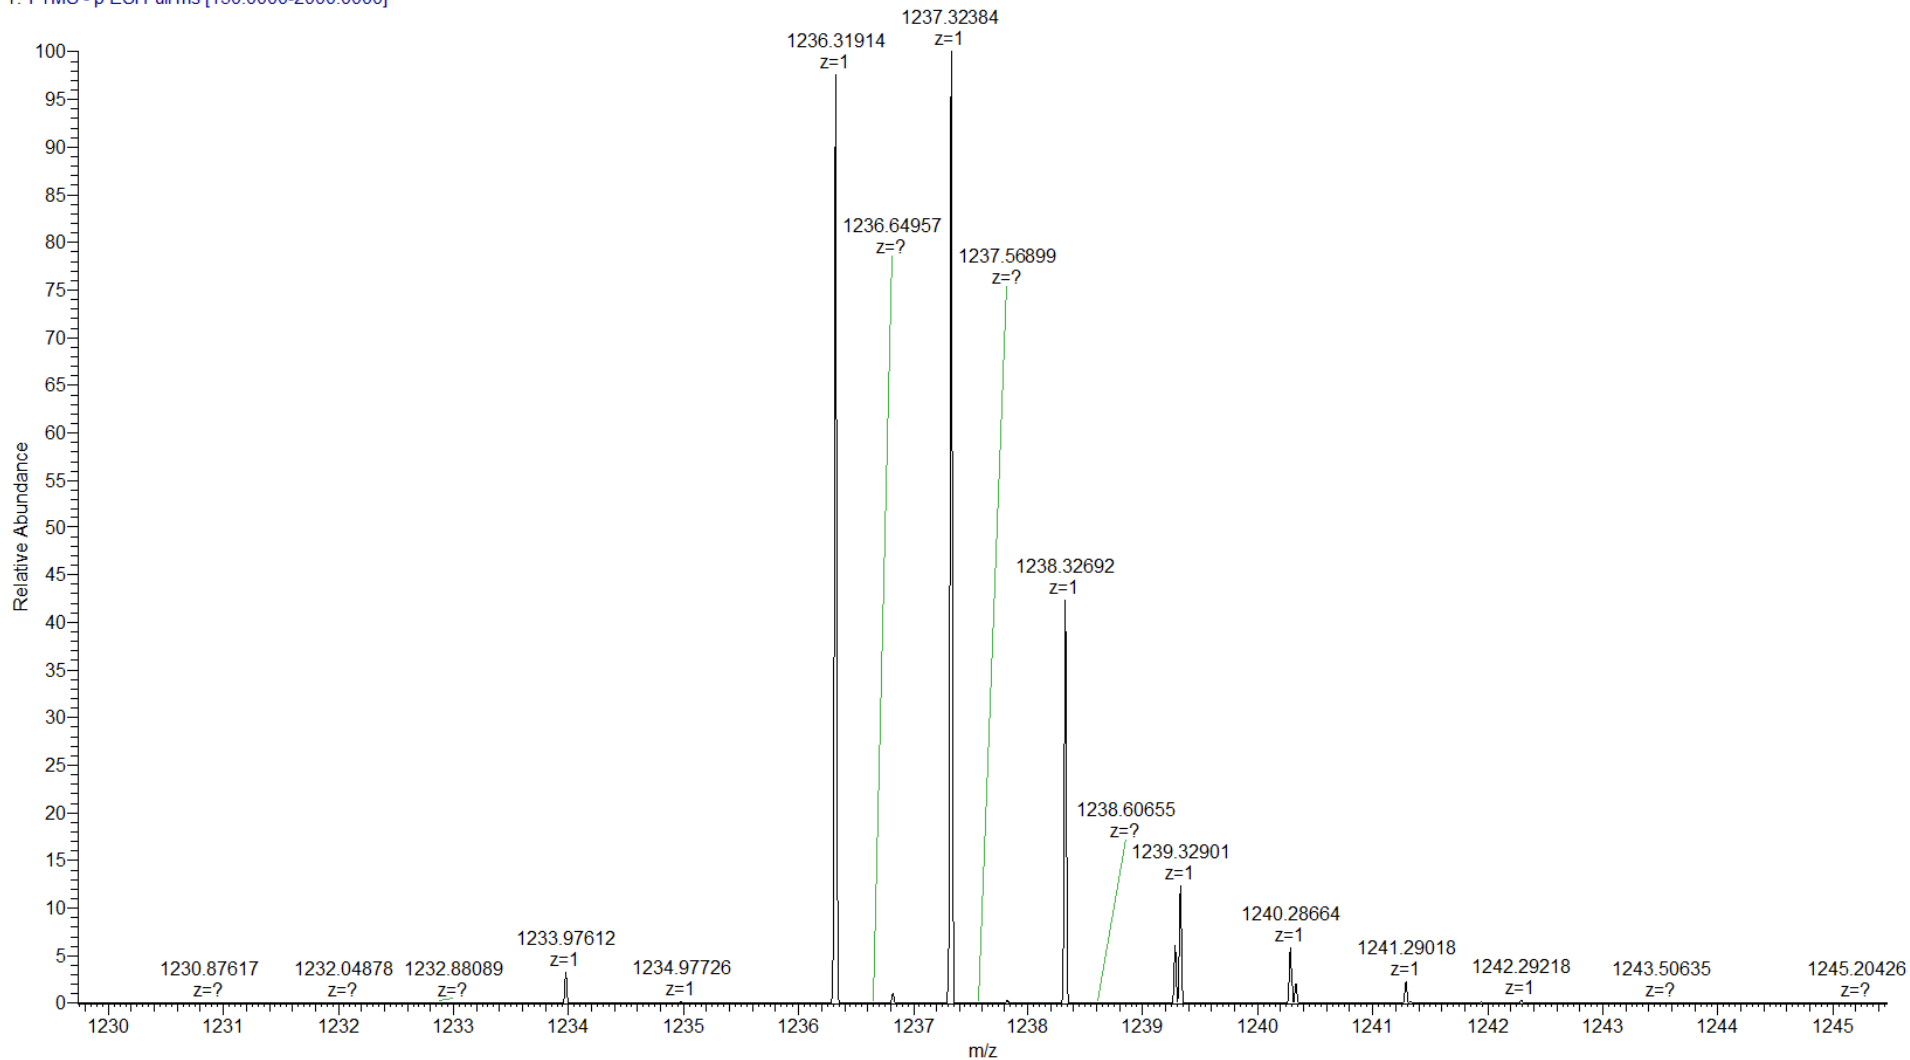

Compound 3c-3': TMGppCH<sub>2</sub>pG-3'-O-C(O)-NH-CH<sub>2</sub>-CH<sub>2</sub>-triazole-CH<sub>2</sub>-HEMABI (NH<sub>4</sub><sup>+</sup> salt)

Chemical structure

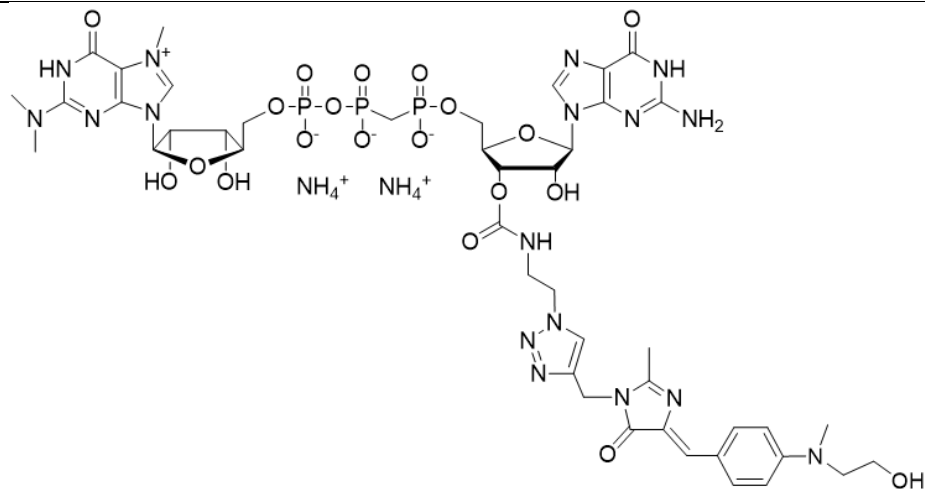

RP-HPLC (conditions c)

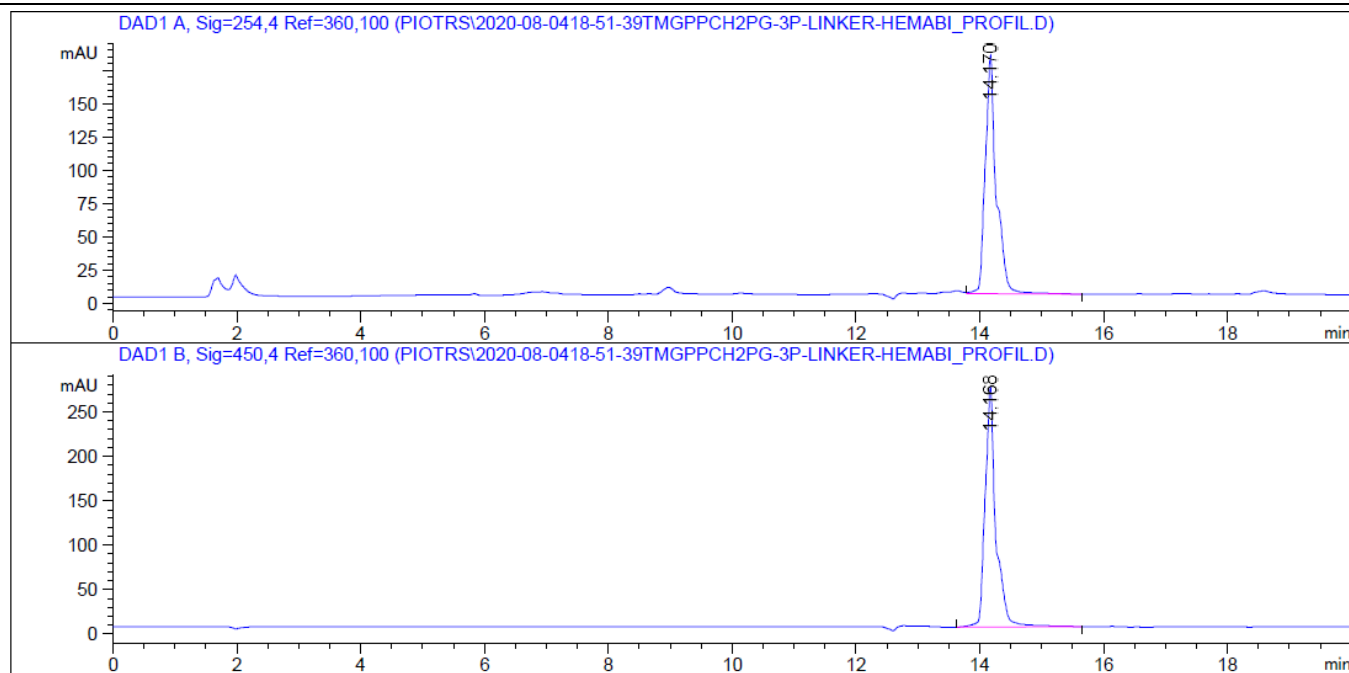

MS (-) ESI (Calc. [M-H]<sup>-</sup> C<sub>44</sub>H<sub>57</sub>N<sub>17</sub>O<sub>20</sub>P<sub>3</sub> : 1236.3184, found: 1236.31838)

200812\_PSu\_04 #4-81 RT: 0.04-0.82 AV: 78 NL: 2.29E5  
T: FTMS - p ESI Full ms [150.0000-2000.0000]

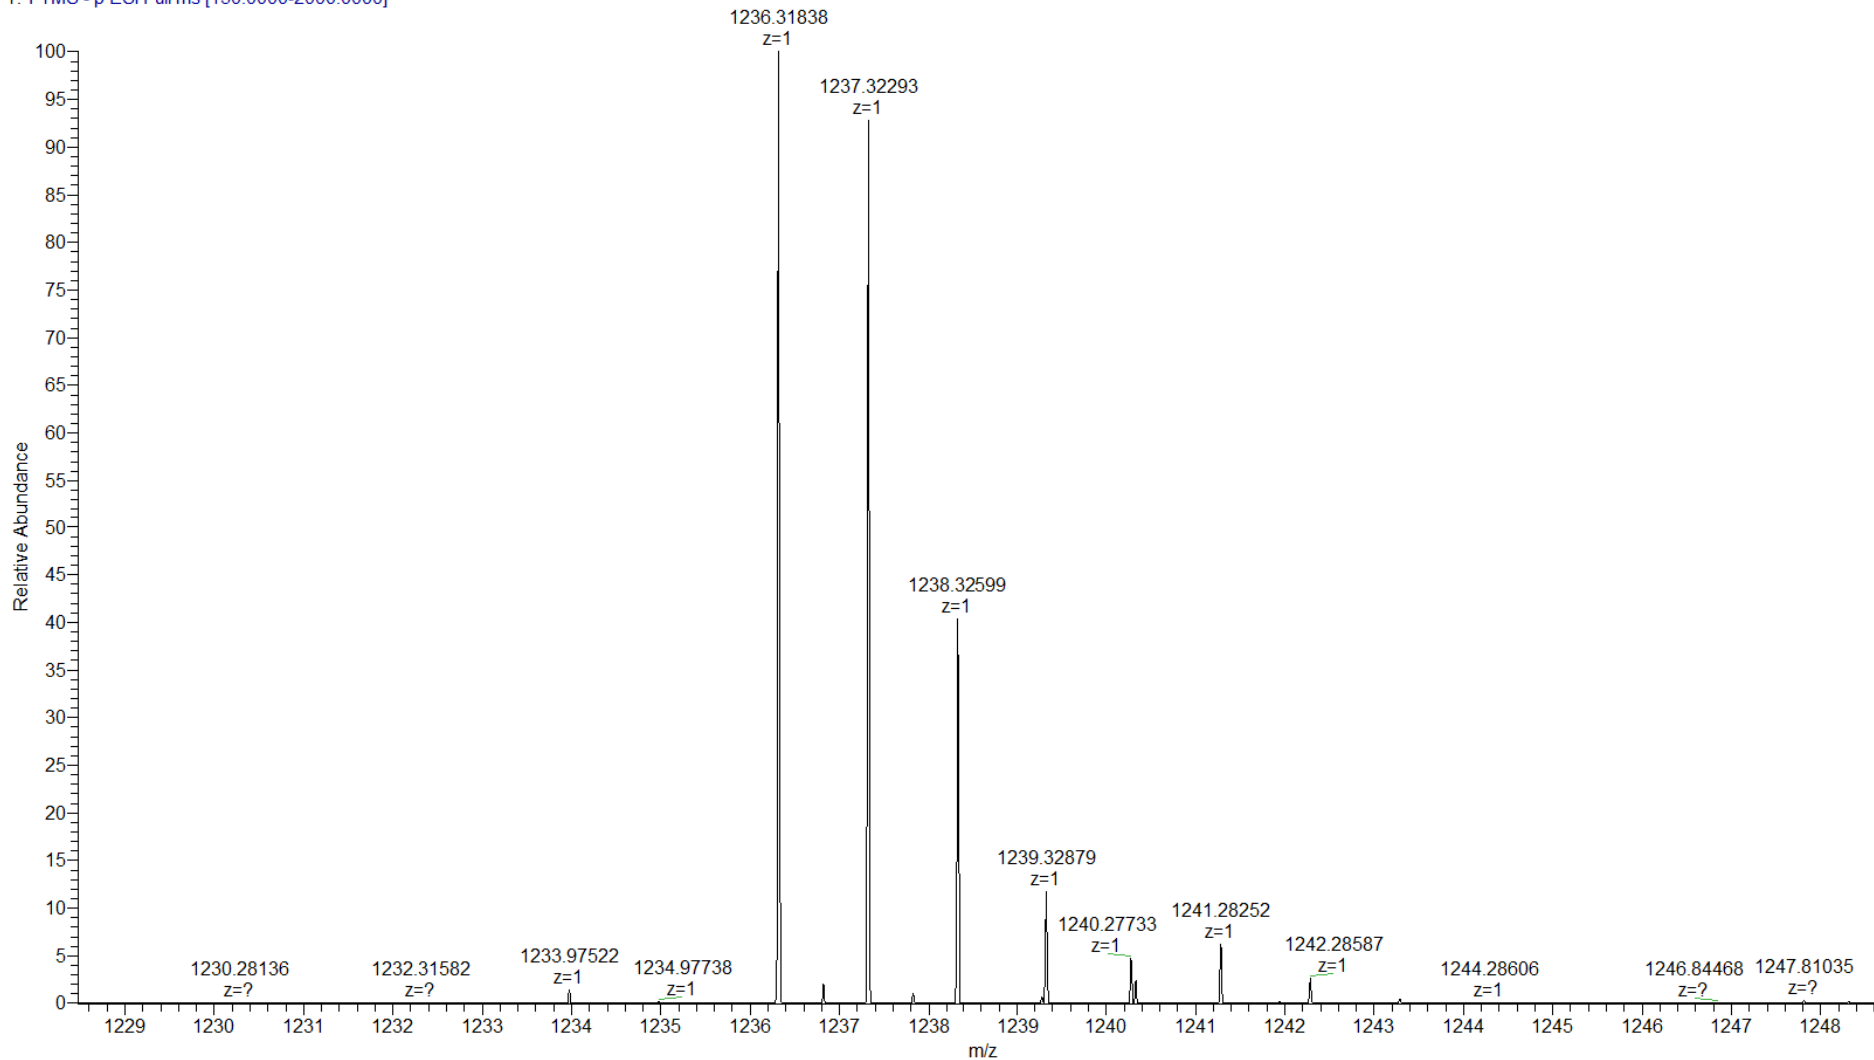



Compound 4a-2': TMGpppA-2'-O-C(O)-NH-CH<sub>2</sub>-CH<sub>2</sub>-triazole-CH<sub>2</sub>-DMHBI (NH<sub>4</sub><sup>+</sup> salt)

Chemical structure

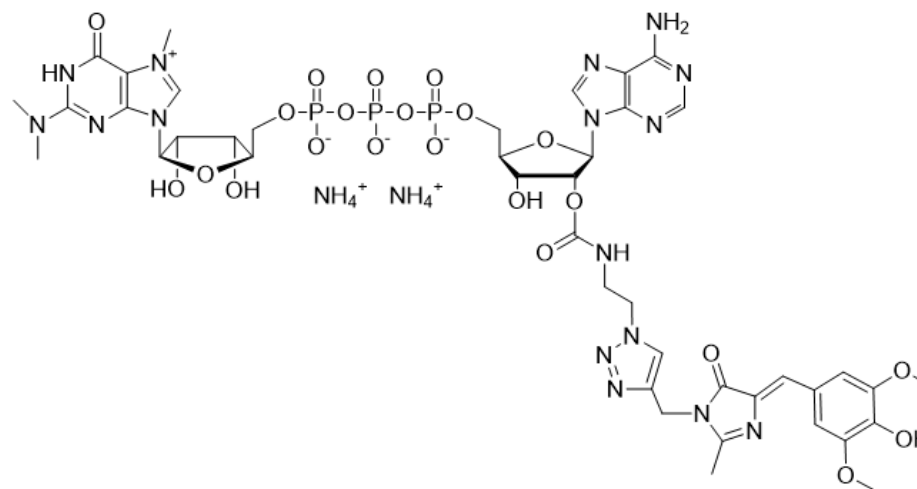

RP-HPLC (conditions c)

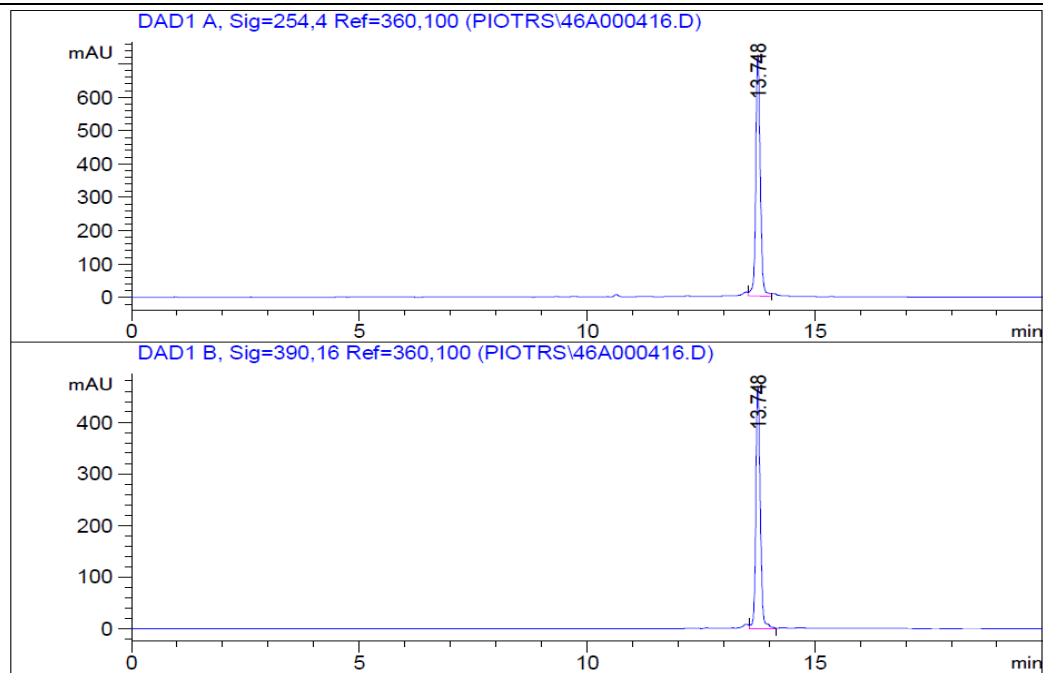

MS (-) ESI (Calc. [M-H]<sup>-</sup> C<sub>42</sub>H<sub>52</sub>N<sub>16</sub>O<sub>22</sub>P<sub>3</sub> : 1225.2660, found: 1225.26611)

200702\_PSU\_04 #129-238 RT: 1.24-2.29 AV: 110 NL: 3.89E6  
T: FTMS - p ESI Full ms [150.0000-2000.0000]

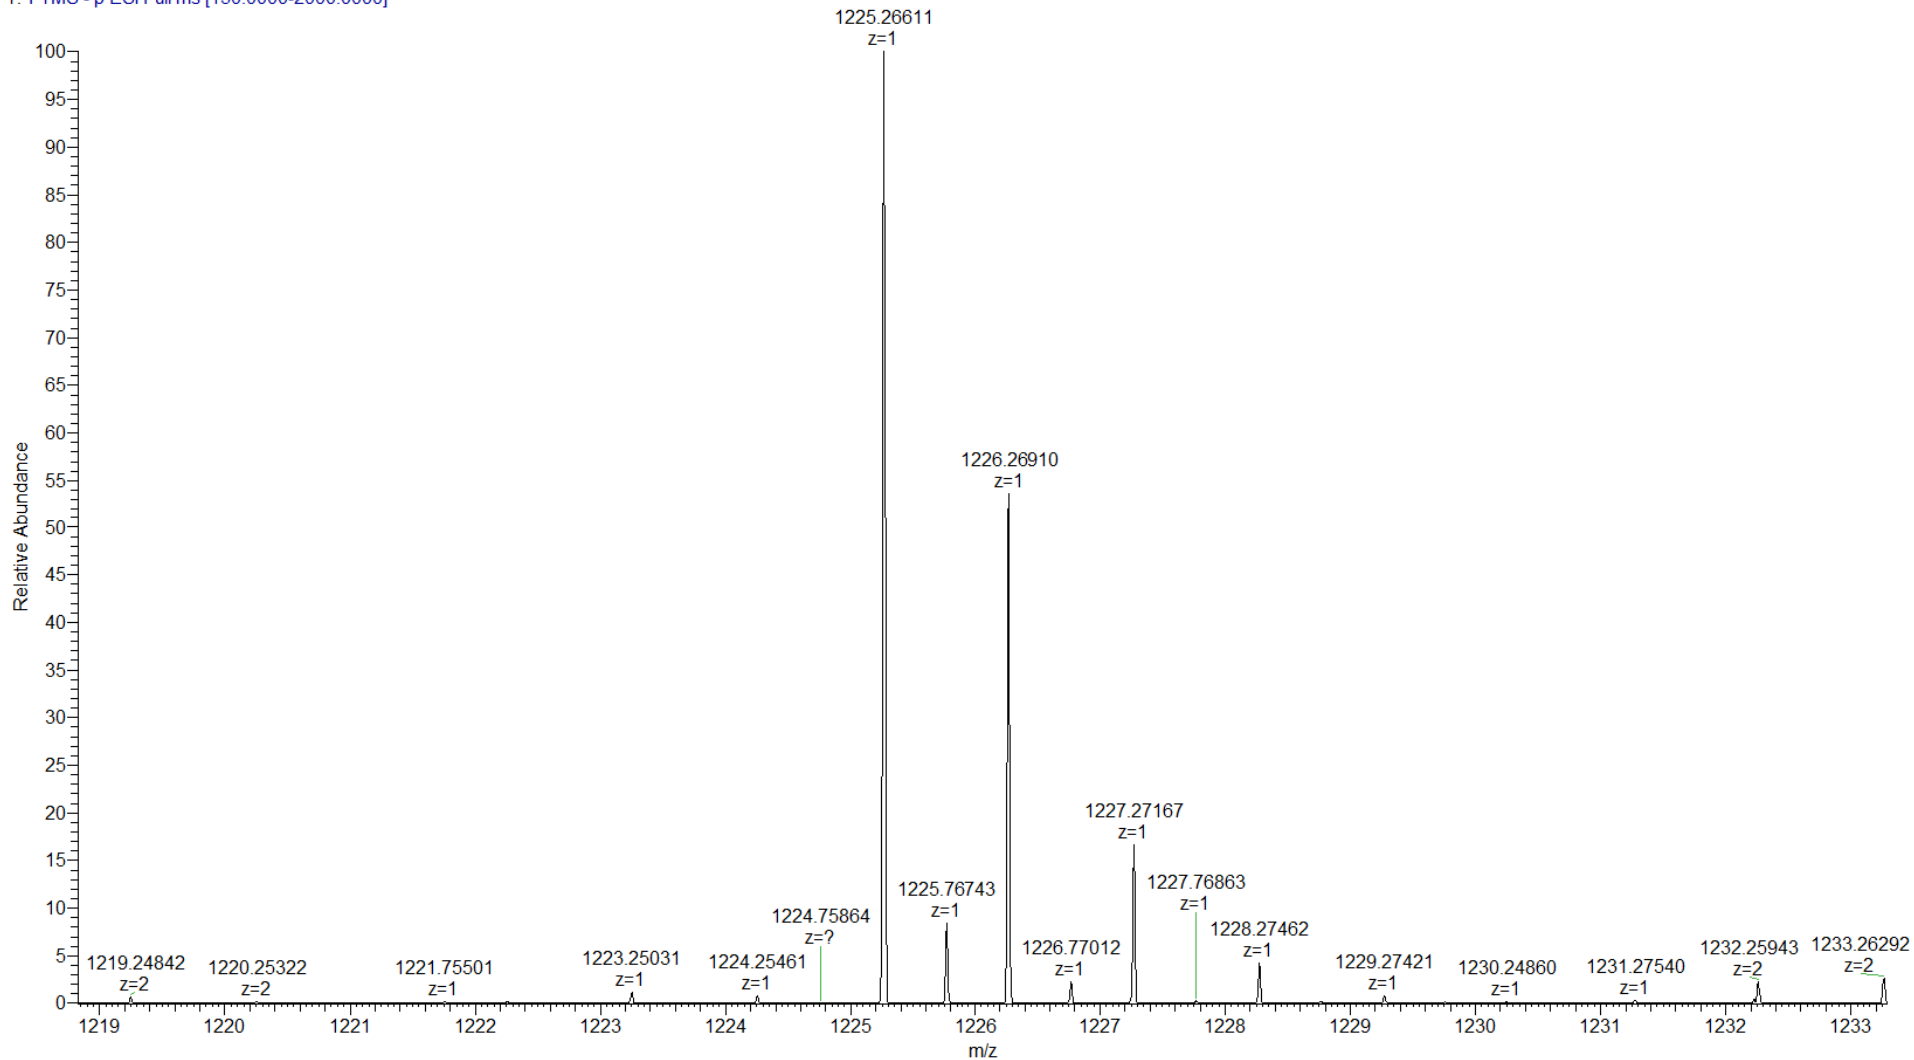

Compound 4a-3': TMGpppA-3'-O-C(O)-NH-CH<sub>2</sub>-CH<sub>2</sub>-triazole-CH<sub>2</sub>-DMHBI (NH<sub>4</sub><sup>+</sup> salt)

Chemical structure

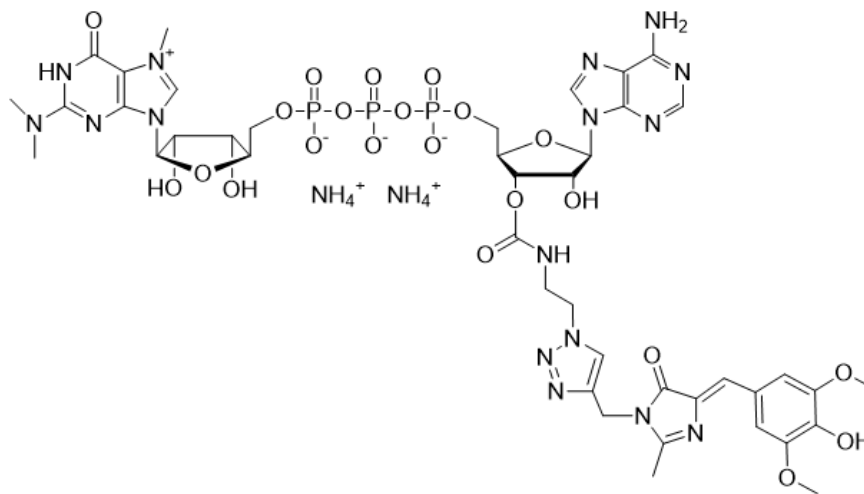

RP-HPLC (conditions c)

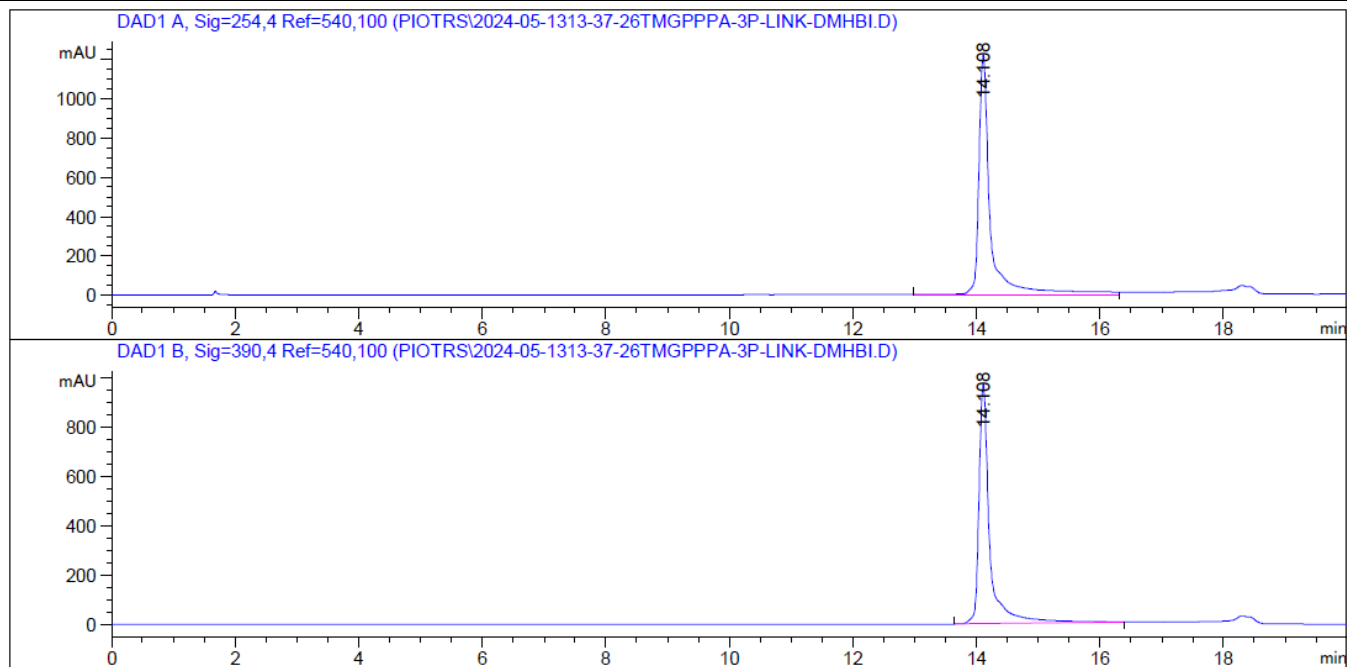

MS (-) ESI (Calc. [M-H]<sup>-</sup> C<sub>42</sub>H<sub>52</sub>N<sub>16</sub>O<sub>22</sub>P<sub>3</sub> : 1225.2660, found: 1225.26692)

200702\_PSU\_05 #18-115 RT: 0.17-1.12 AV: 98 NL: 3.05E6  
T: FTMS - p ESI Full ms [150.0000-2000.0000]

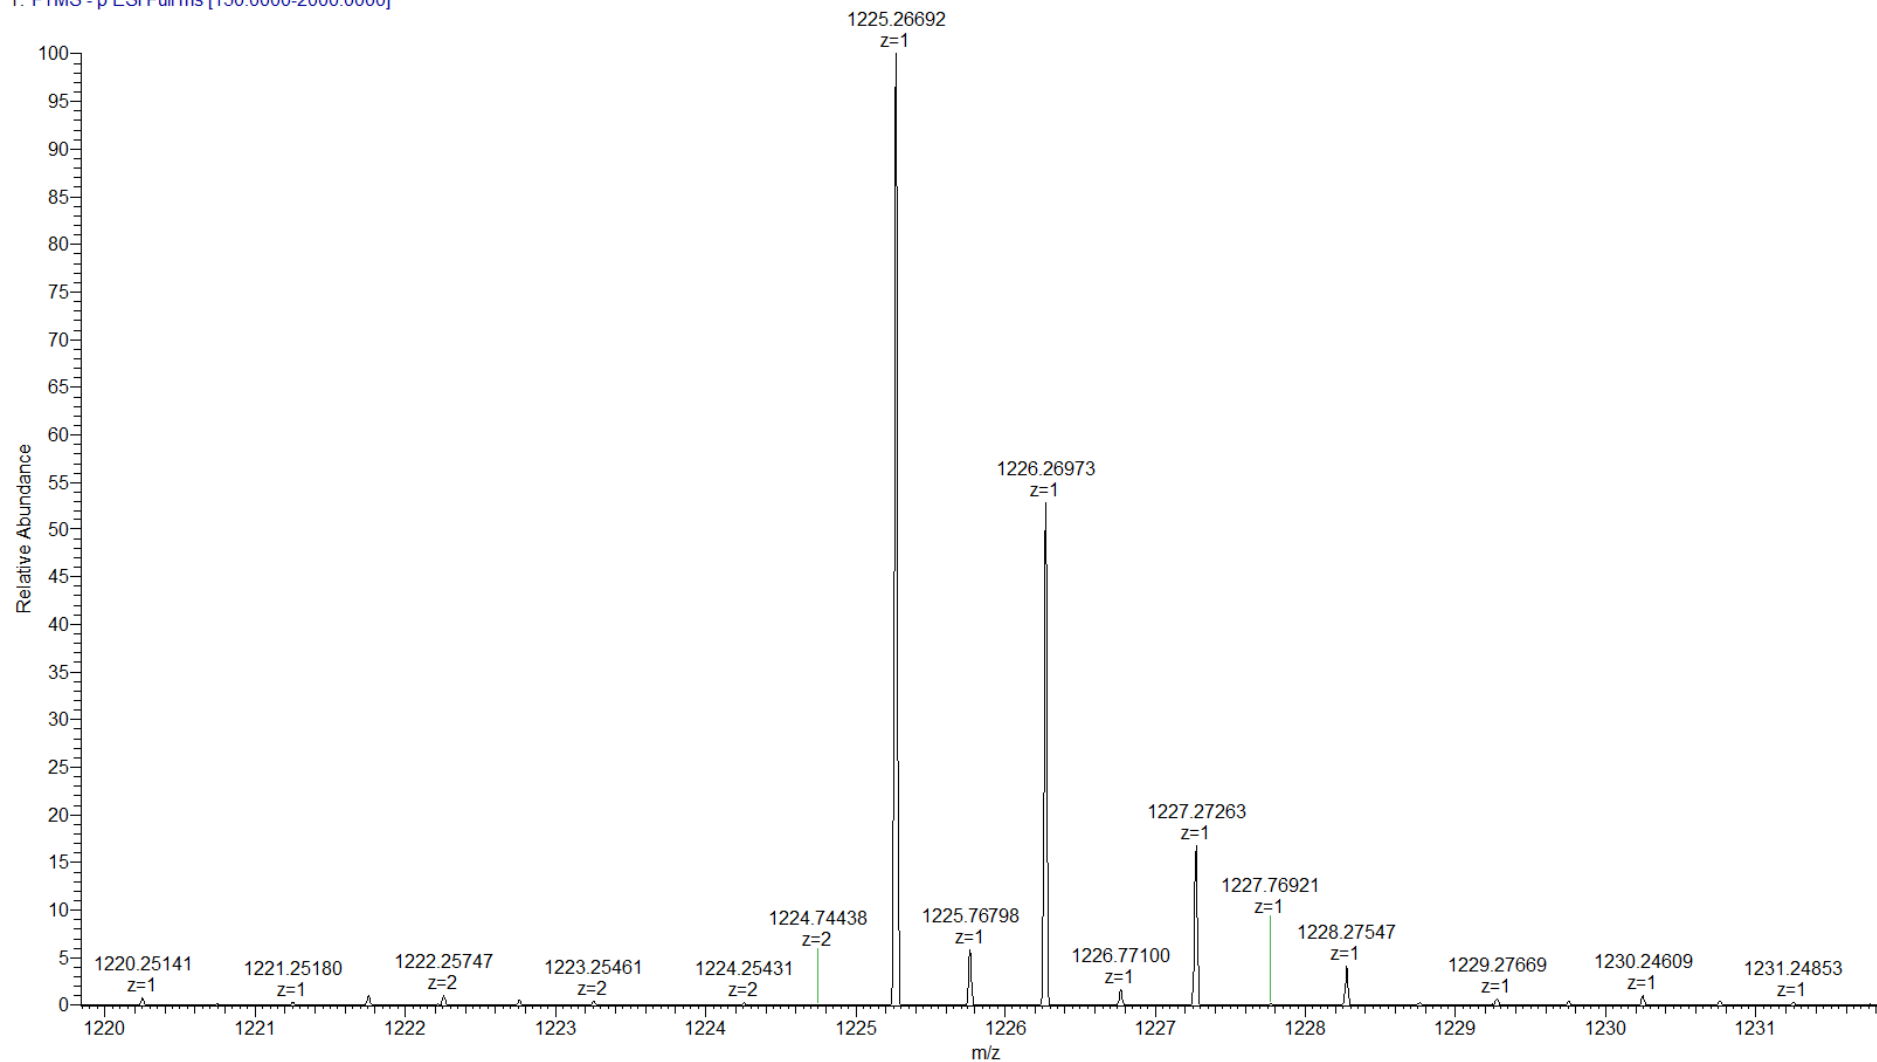

Compound 4c-2': TMGpppA-2'-O-C(O)-NH-CH<sub>2</sub>-CH<sub>2</sub>-triazole-CH<sub>2</sub>-HEMABI (NH<sub>4</sub><sup>+</sup> salt)

Chemical structure

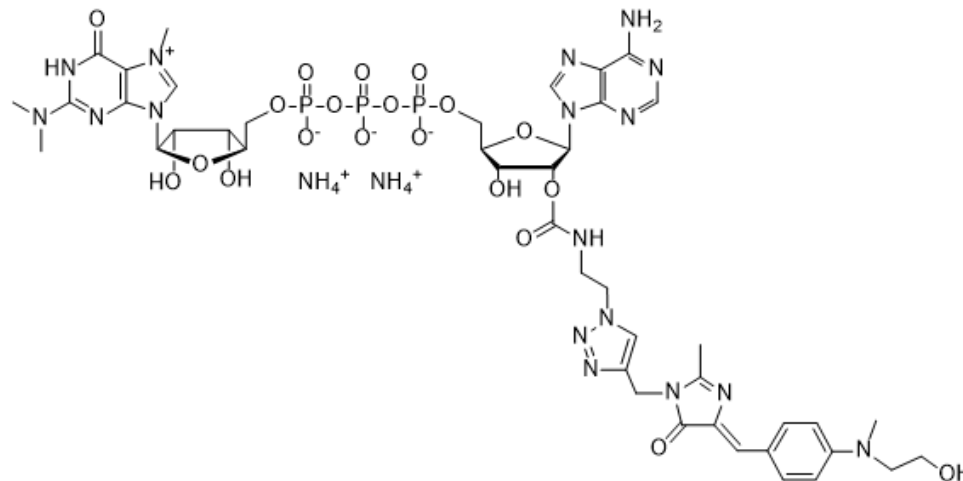

RP-HPLC (conditions c)

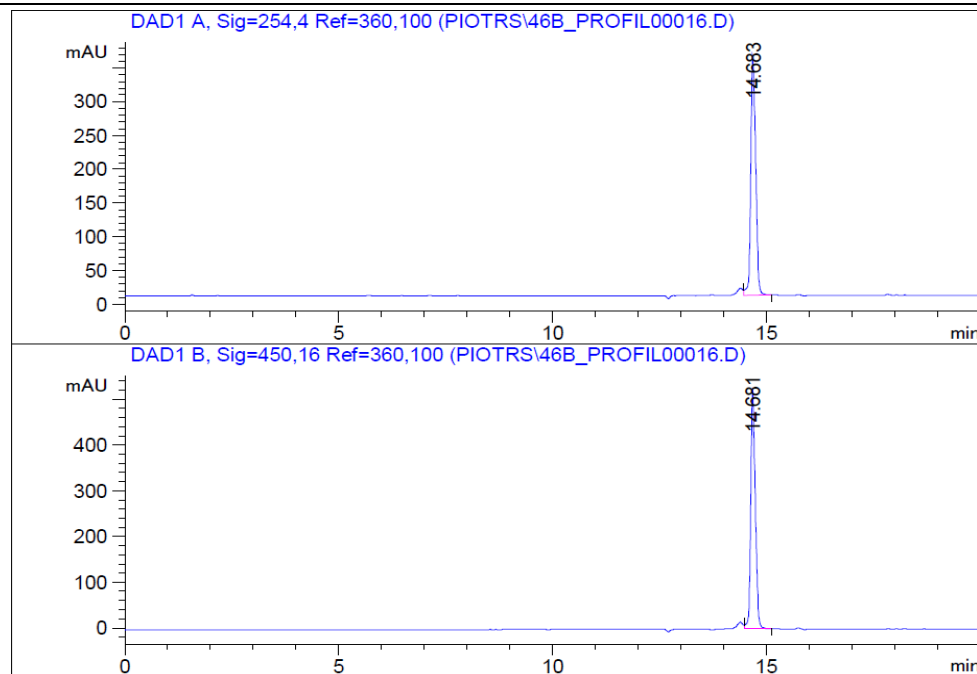

220331\_PSu\_06 #10-79 RT: 0.09-0.69 AV: 70 NL: 5.13E6  
T: FTMS - p ESI Full ms [160.0000-2000.0000]

MS (-) ESI (Calc. [M-H]<sup>-</sup> C<sub>43</sub>H<sub>55</sub>N<sub>17</sub>O<sub>20</sub>P<sub>3</sub> : 1222.3028, found: 1222.30412)

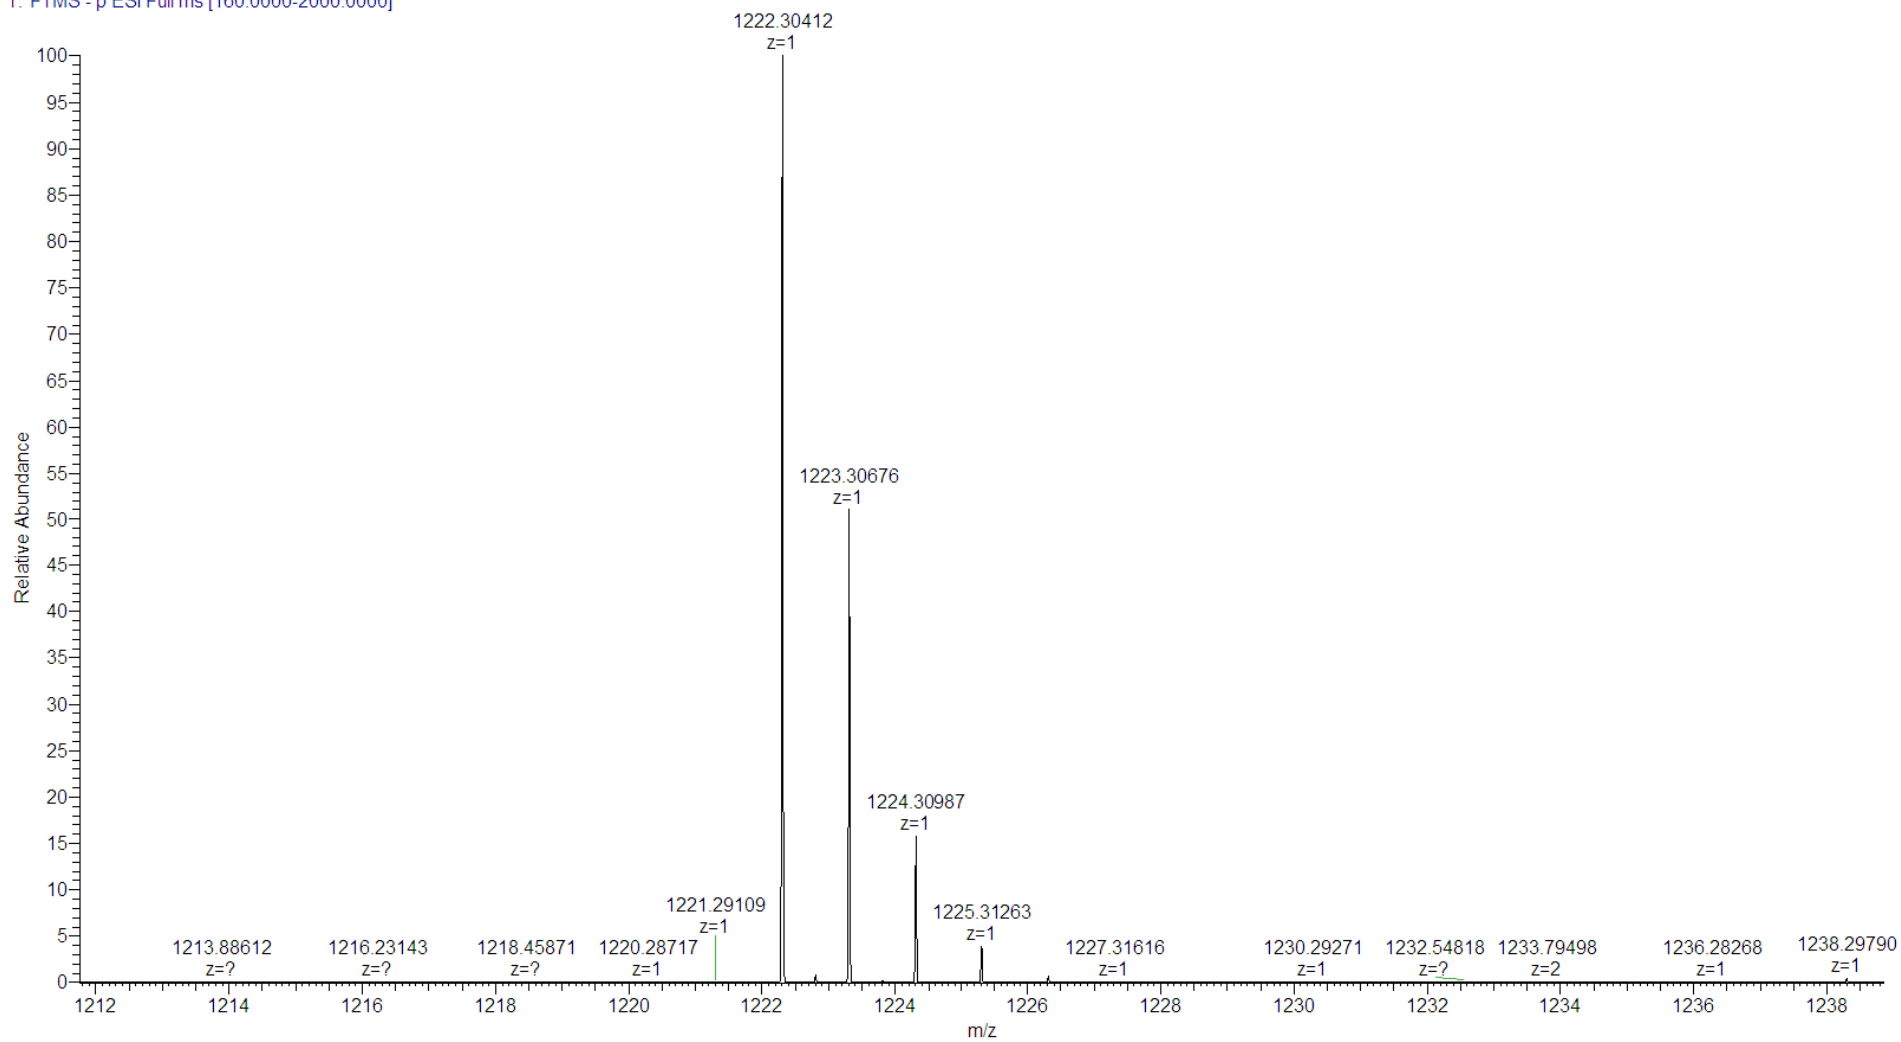

Compound 4c-3': TMGpppA-3'-O-C(O)-NH-CH<sub>2</sub>-CH<sub>2</sub>-triazole-CH<sub>2</sub>-HEMABI (NH<sub>4</sub><sup>+</sup> salt)

Chemical structure

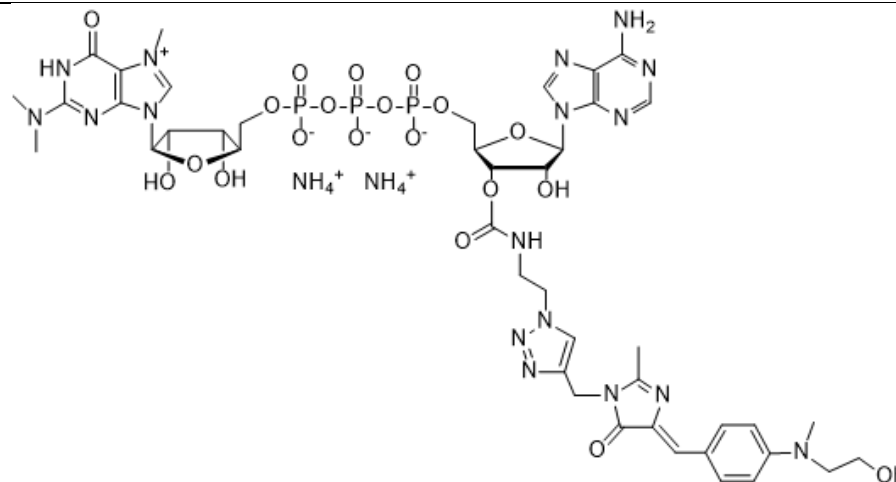

RP-HPLC (conditions c)

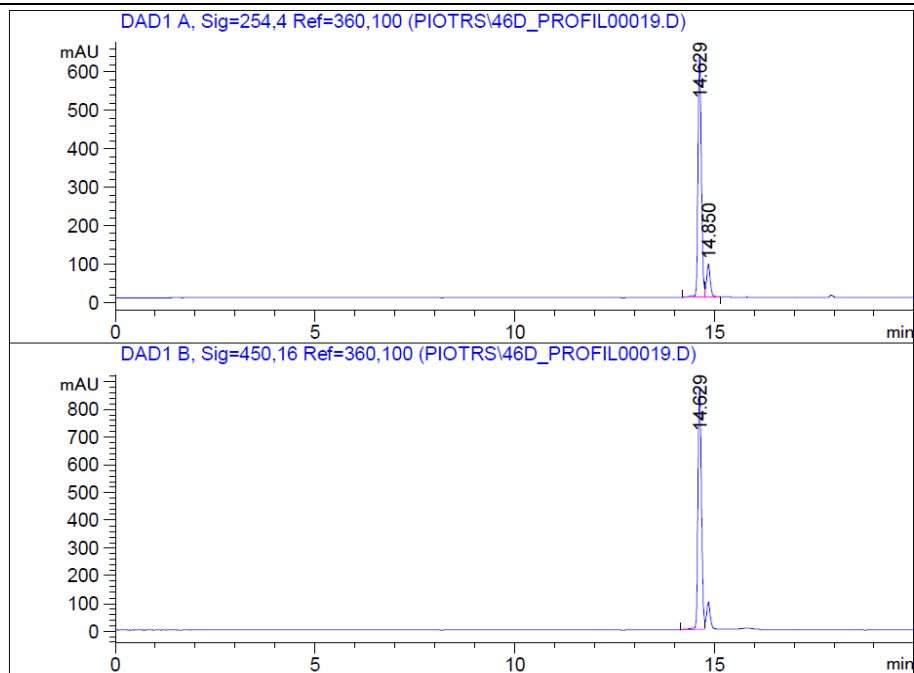

MS (-) ESI (Calc. [M-H]<sup>-</sup> C<sub>43</sub>H<sub>55</sub>N<sub>17</sub>O<sub>20</sub>P<sub>3</sub> : 1222.3028, found: 1222.30368)

200702\_PSU\_06 #15-89 RT: 0.15-0.88 AV: 75 NL: 1.45E6  
T: FTMS - p ESI Full ms [150.0000-2000.0000]

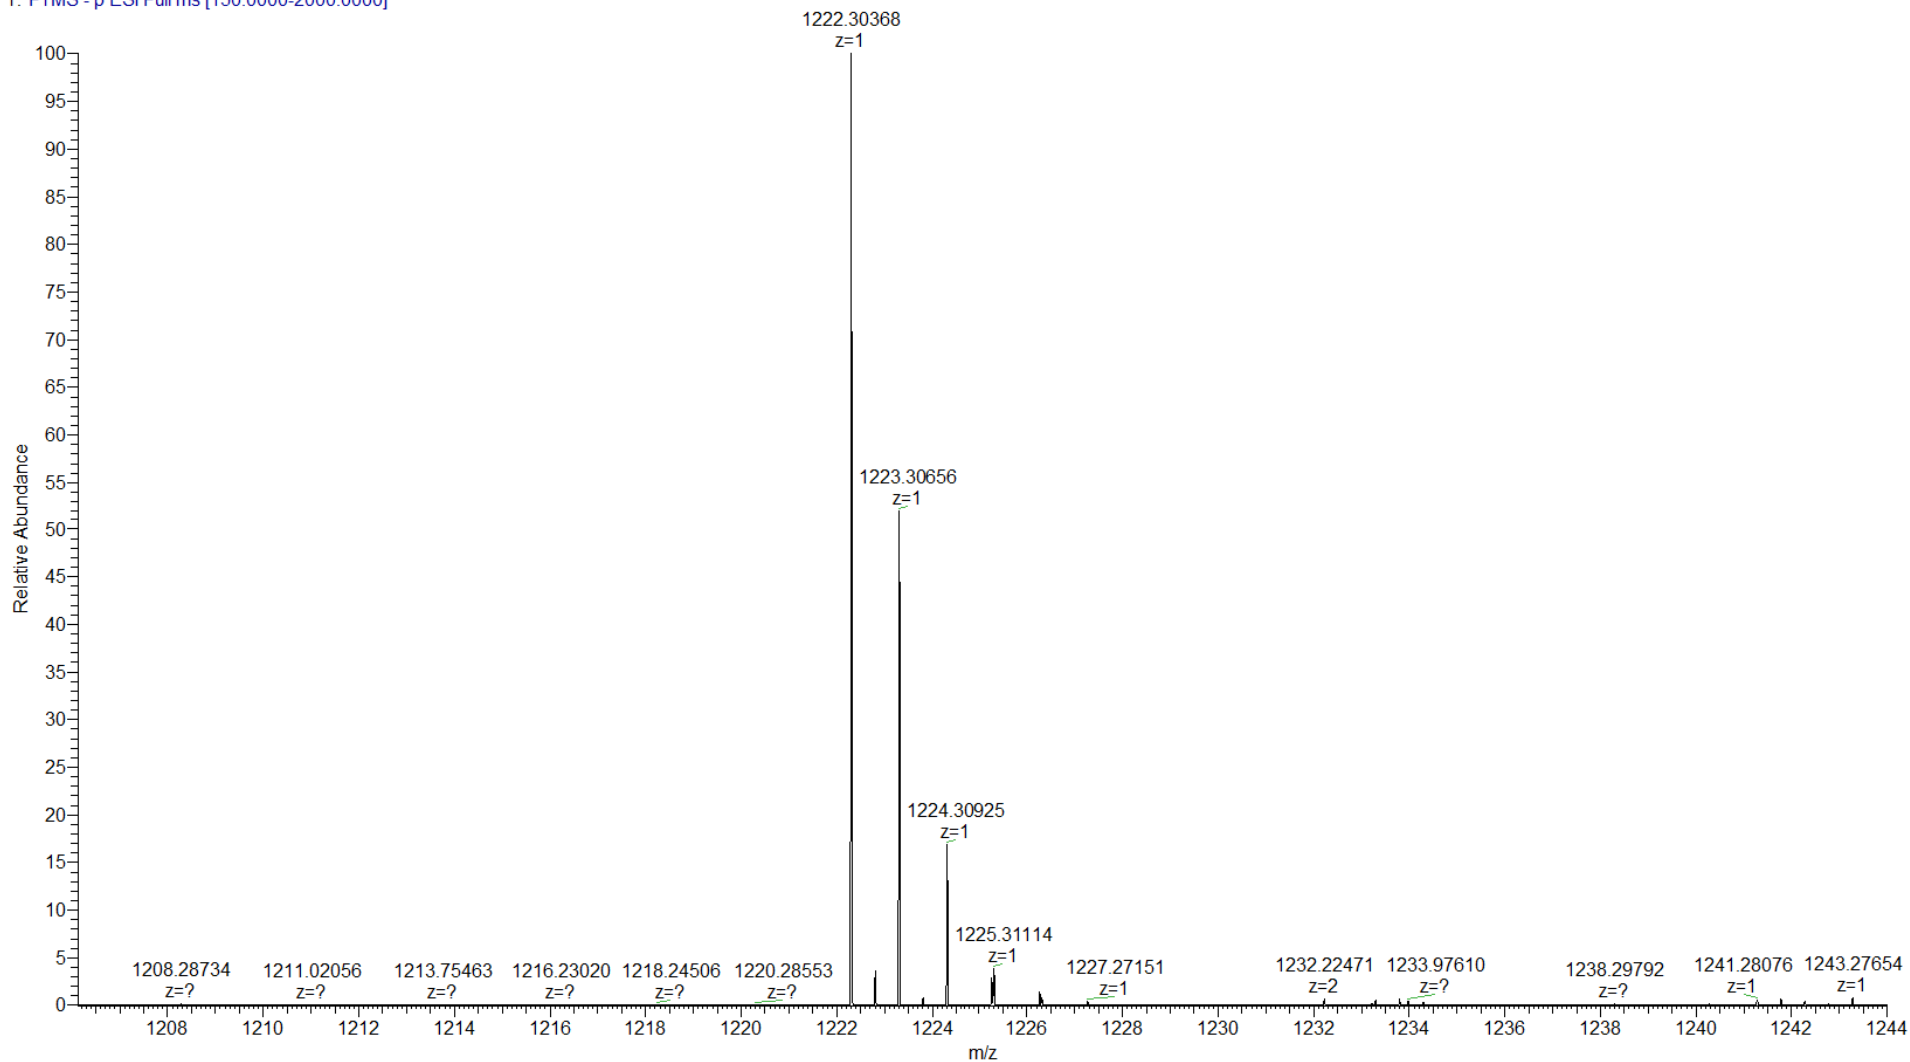



Compound 5a-2': TMGppppG-2'-O-C(O)-NH-CH<sub>2</sub>-CH<sub>2</sub>-triazole-CH<sub>2</sub>-DMHBI (NH<sub>4</sub><sup>+</sup> salt)

Chemical structure

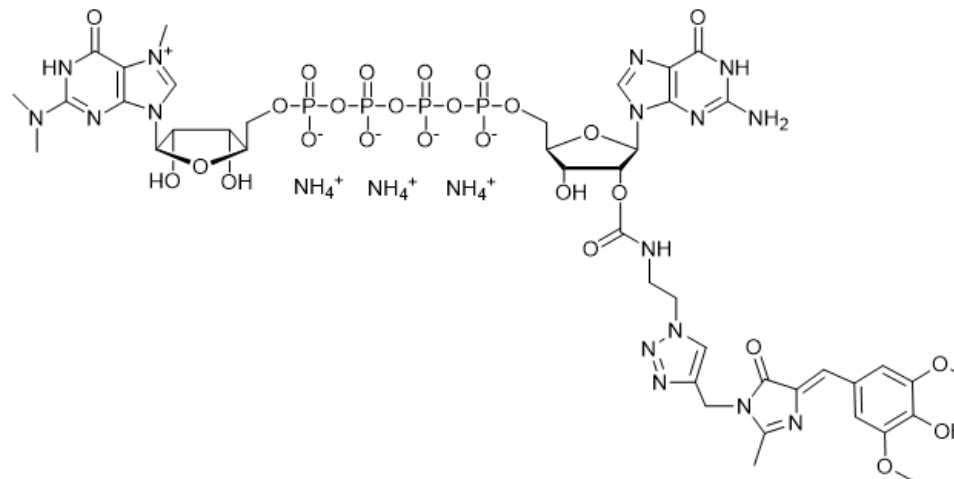

RP-HPLC (conditions c)

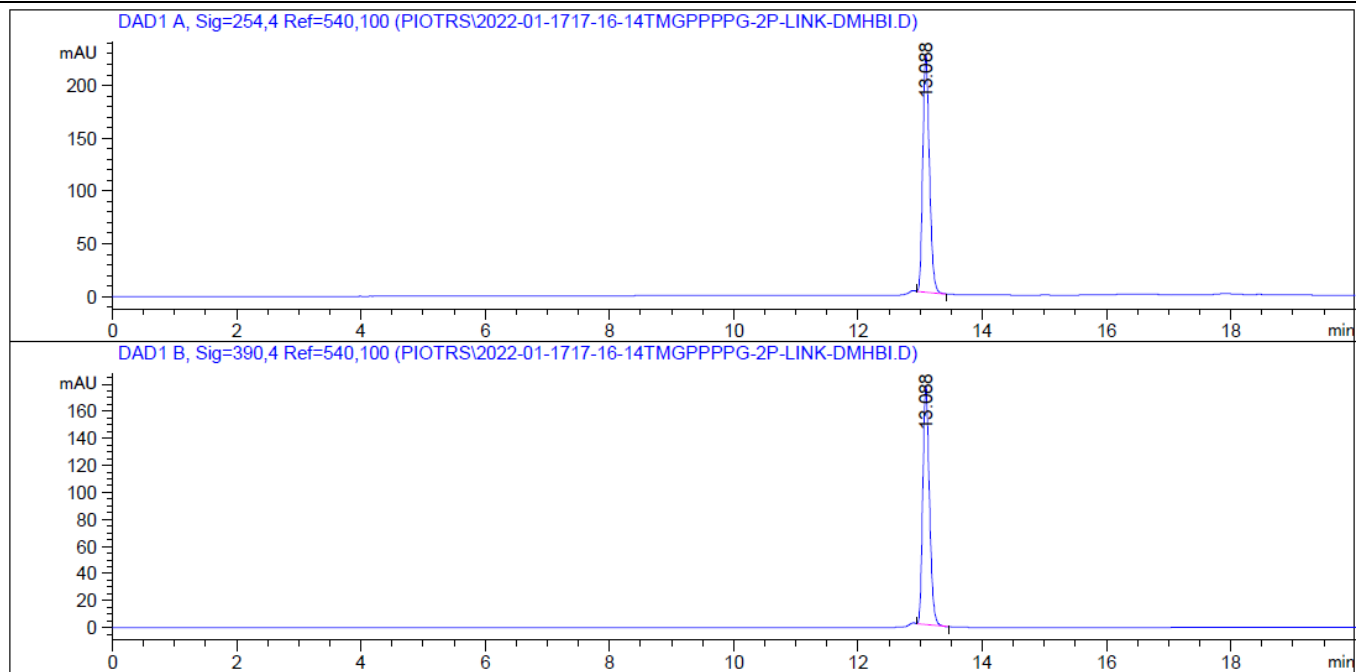

220114\_PSU\_10 #9-215 RT: 0.08-1.88 AV: 207 NL: 8.49E5  
T: FTMS - p ESI Full ms [200.0000-2000.0000]

MS (-) ESI (Calc. [M-H]<sup>-</sup> C<sub>42</sub>H<sub>53</sub>N<sub>16</sub>O<sub>26</sub>P<sub>4</sub> : 1321.2273, found : 1321.22706)

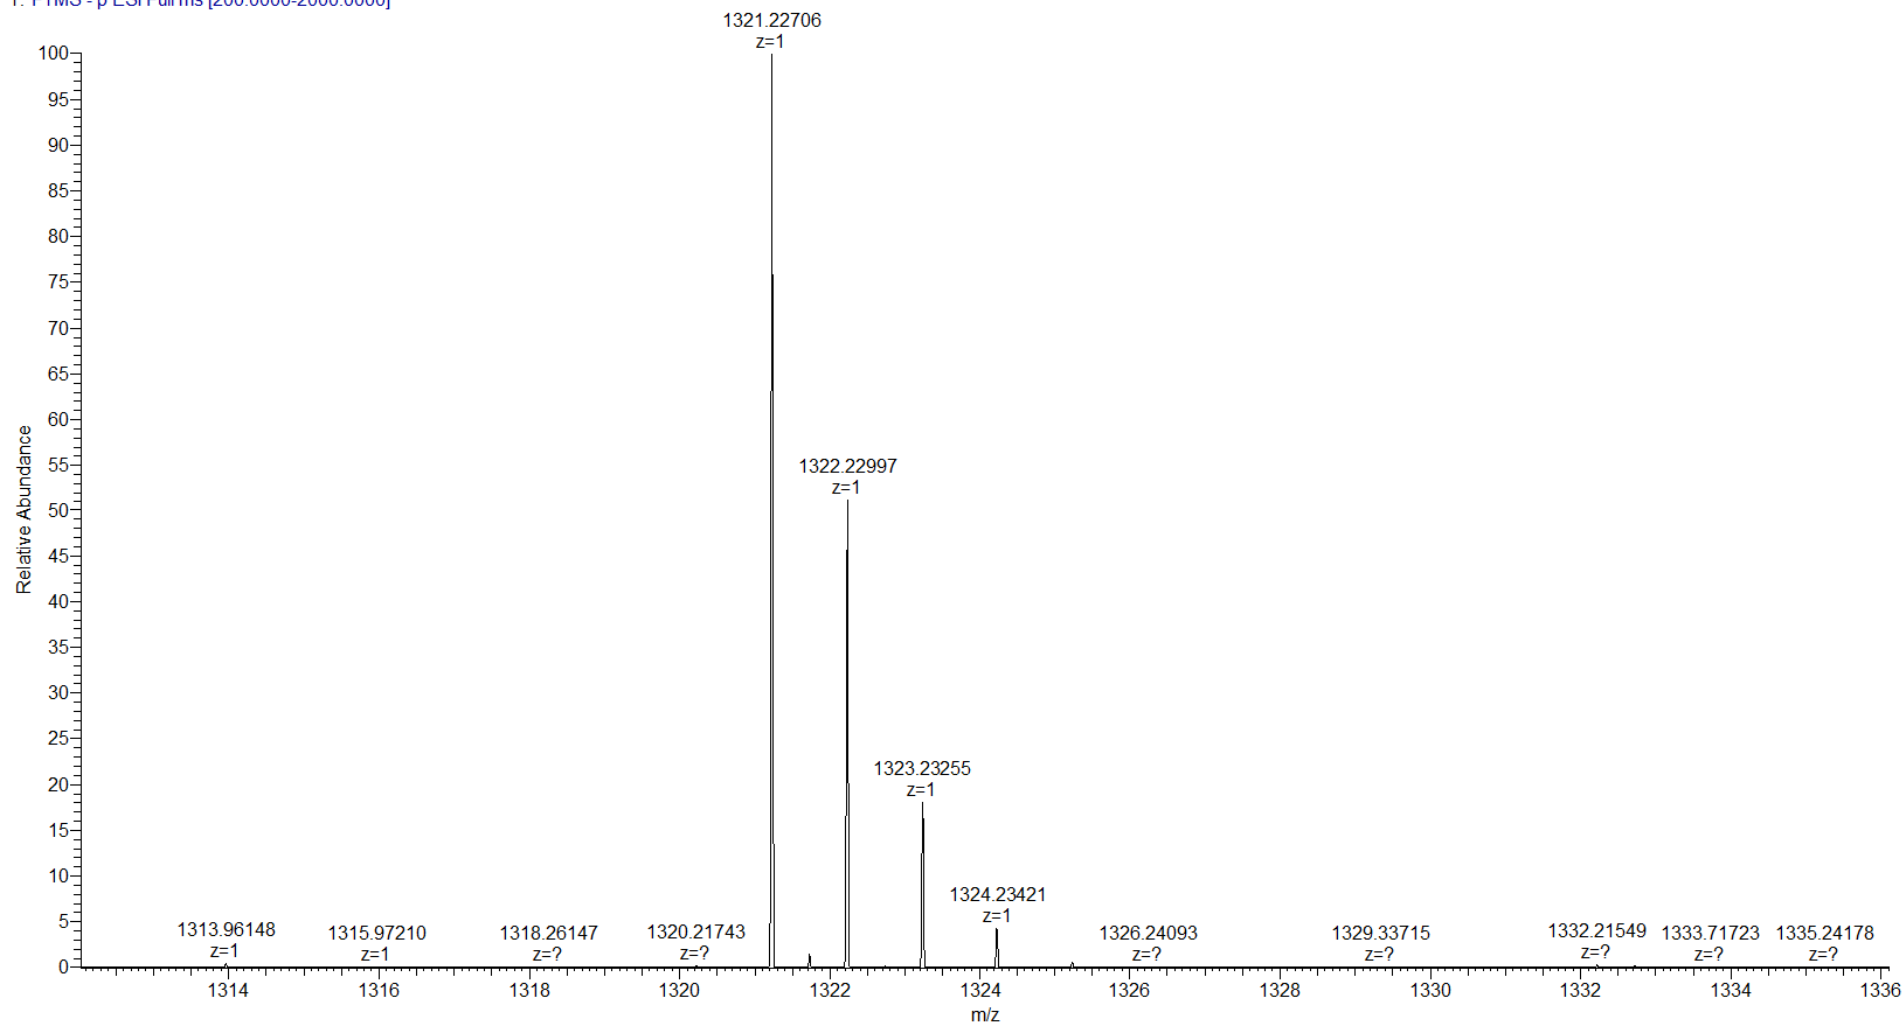

Compound 5a-3': TMGppppG-3'-O-C(O)-NH-CH<sub>2</sub>-CH<sub>2</sub>-triazole-CH<sub>2</sub>-DMHBI (NH<sub>4</sub><sup>+</sup> salt)

Chemical structure

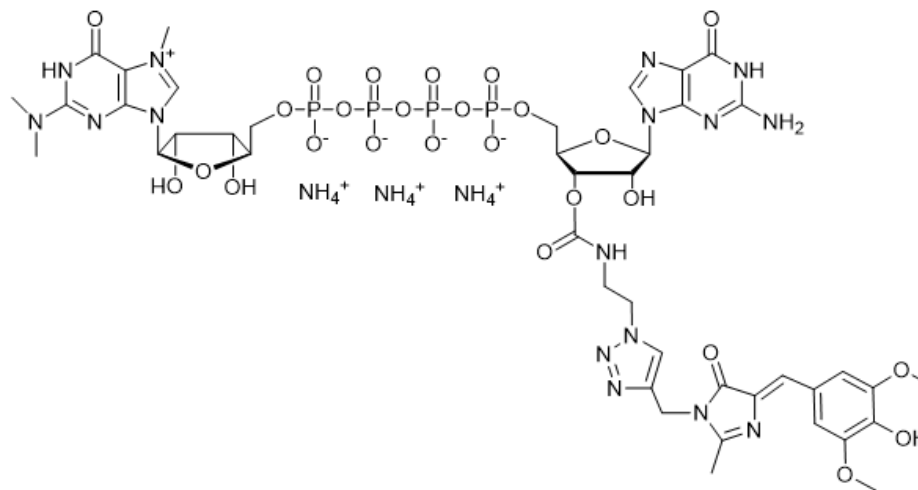

RP-HPLC (conditions c)

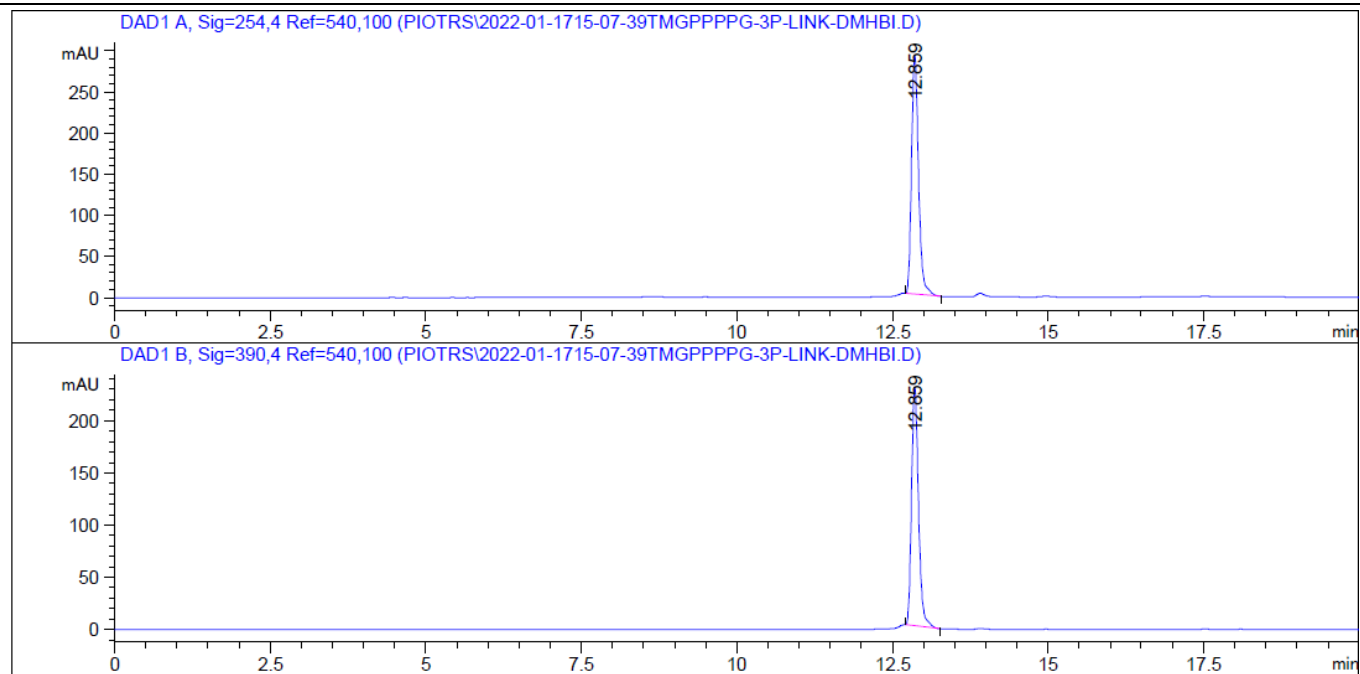

220114\_PSU\_11 #6-36 RT: 0.05-0.31 AV: 31 NL: 9.80E4  
T: FTMS - p ESI Full ms [200.0000-2000.0000]

MS (-) ESI (Calc. [M-H]<sup>-</sup> C<sub>42</sub>H<sub>53</sub>N<sub>16</sub>O<sub>26</sub>P<sub>4</sub> : 1321.2273, found : 1321.22689)

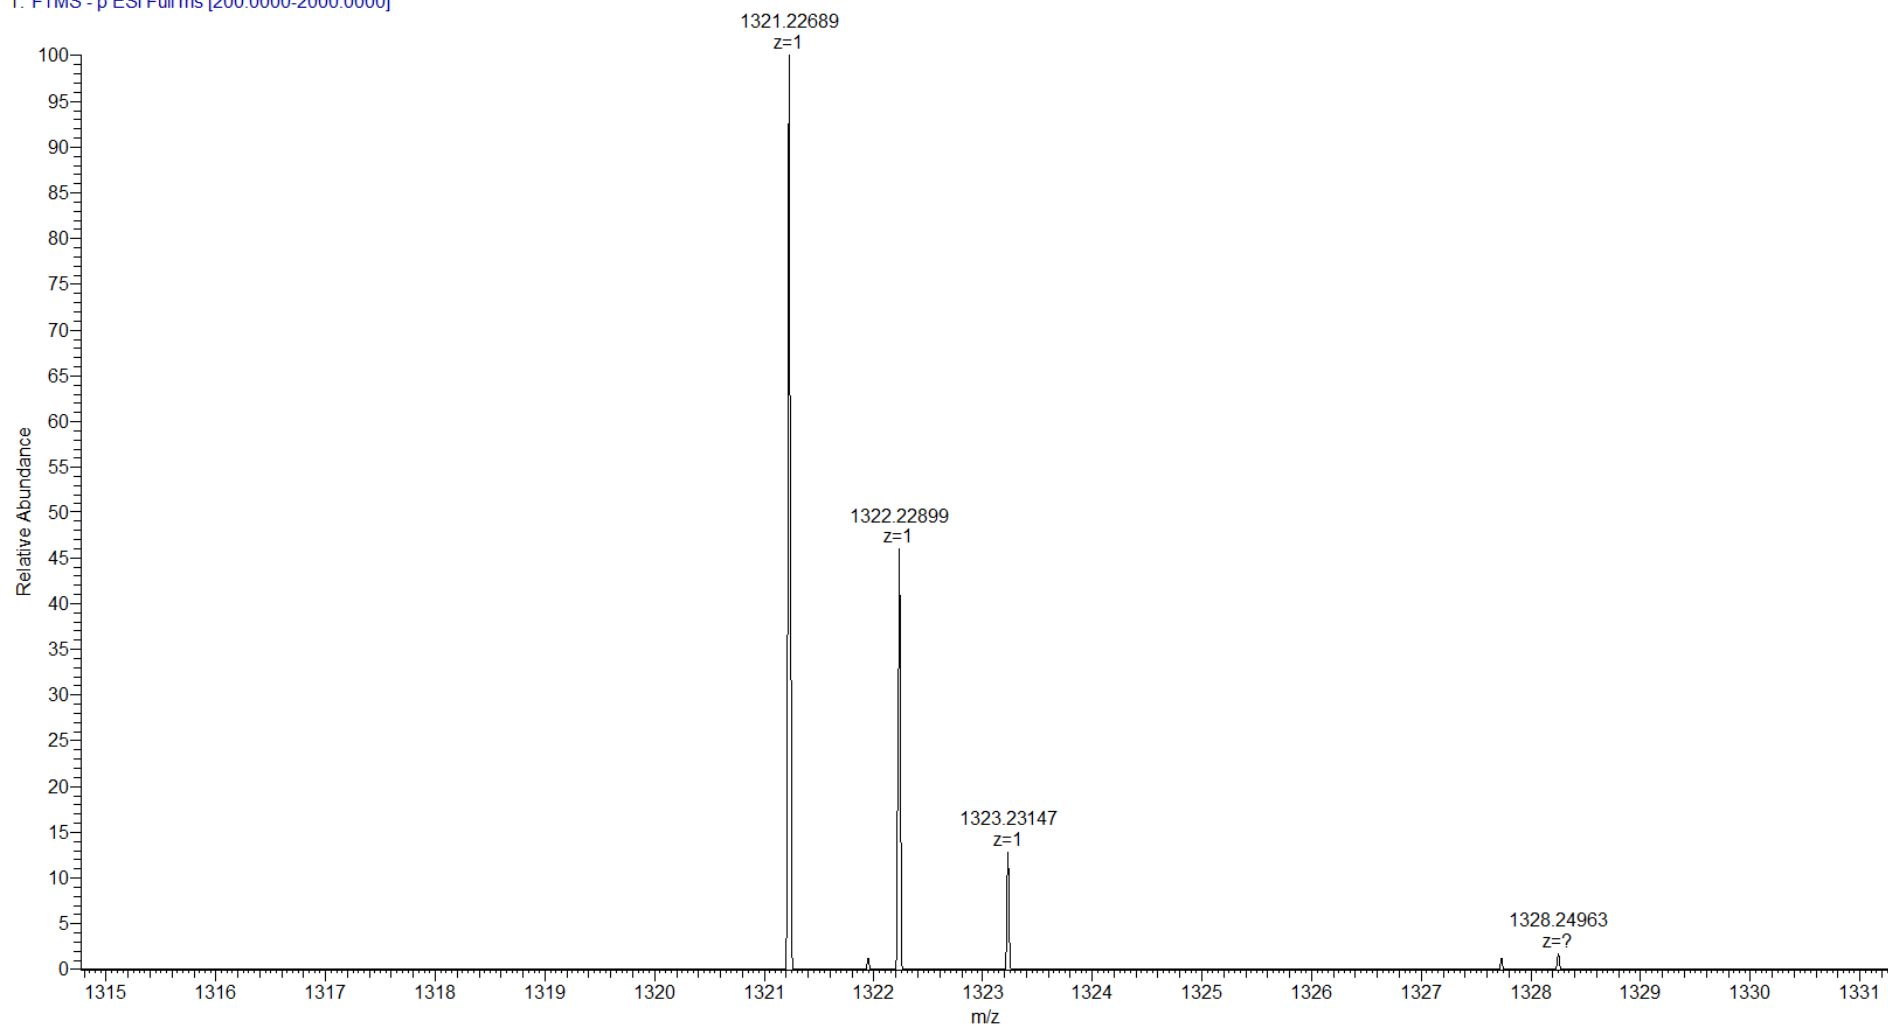

Compound 5c-2': TMGppppG-2'-O-C(O)-NH-CH<sub>2</sub>-CH<sub>2</sub>-triazole-CH<sub>2</sub>-HEMABI (NH<sub>4</sub><sup>+</sup> salt)

Chemical structure

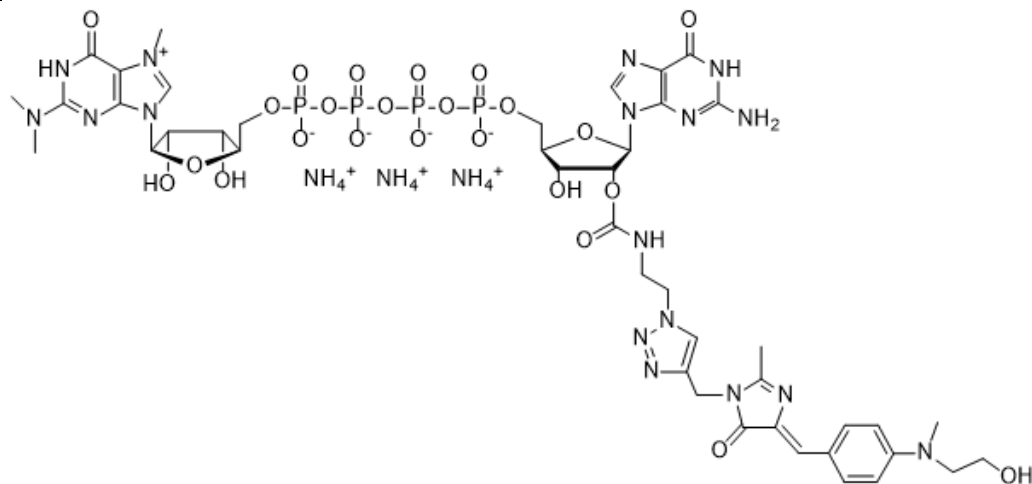

RP-HPLC (conditions c)

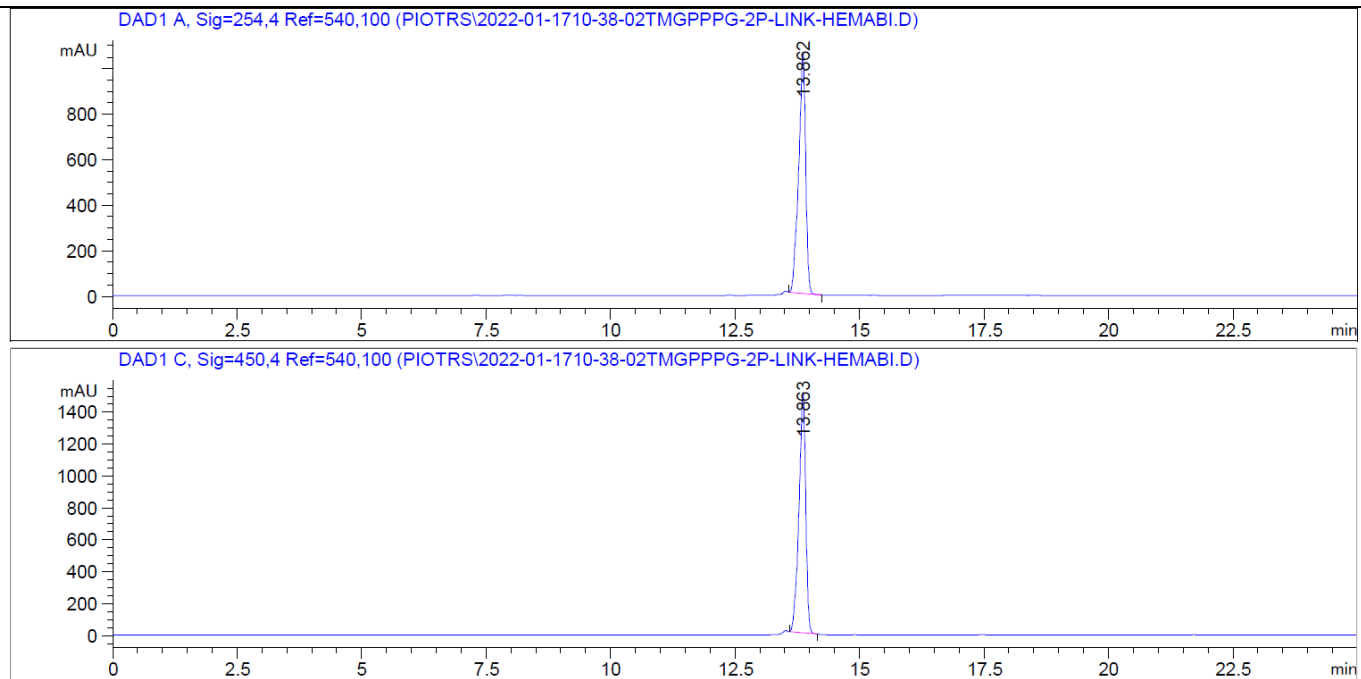

220114\_PSU\_08 #6-40 RT: 0.05-0.35 AV: 35 NL: 7.11E5  
T: FTMS - p ESI Full ms [200.0000-2000.0000]

MS (-) ESI (Calc. [M-H]<sup>-</sup> C<sub>43</sub>H<sub>56</sub>N<sub>17</sub>O<sub>24</sub>P<sub>4</sub> : 1318.2640, found : 1318.26377)

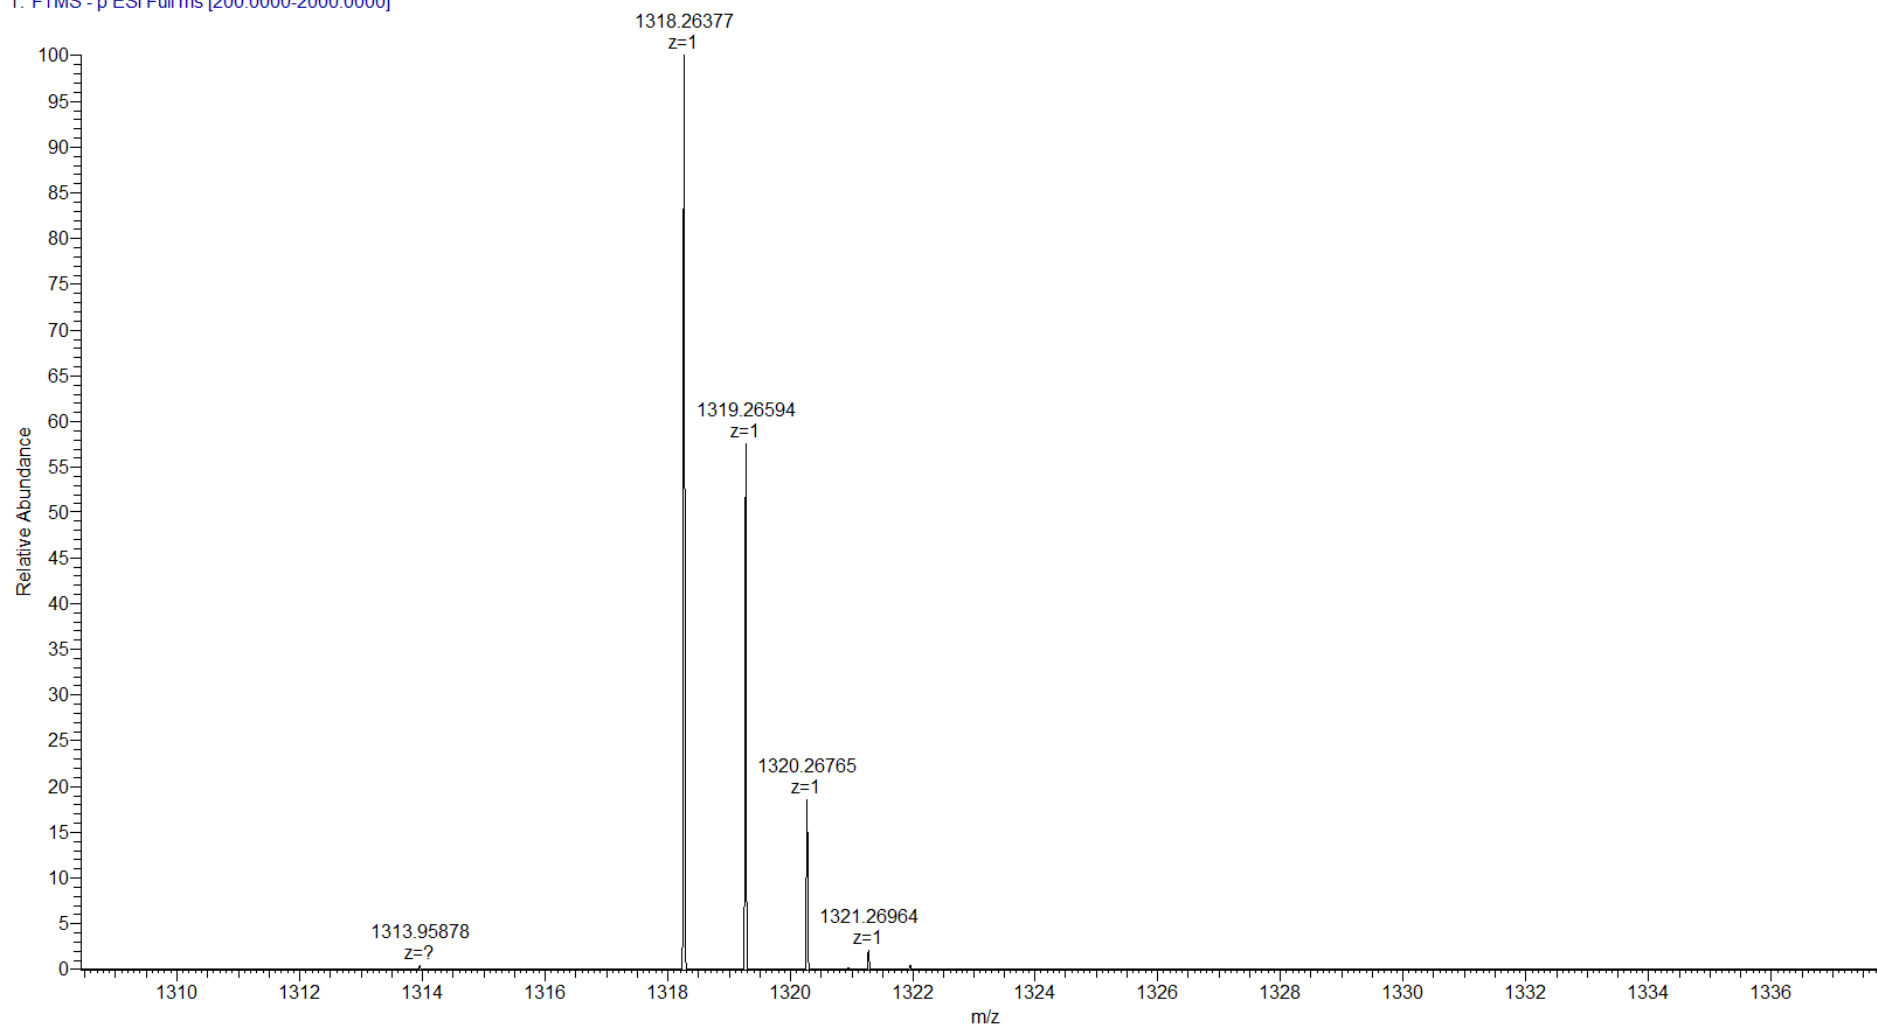

Compound 5c-3': TMGppppG-3'-O-C(O)-NH-CH<sub>2</sub>-CH<sub>2</sub>-triazole-CH<sub>2</sub>-HEMABI (NH<sub>4</sub><sup>+</sup> salt)

Chemical structure

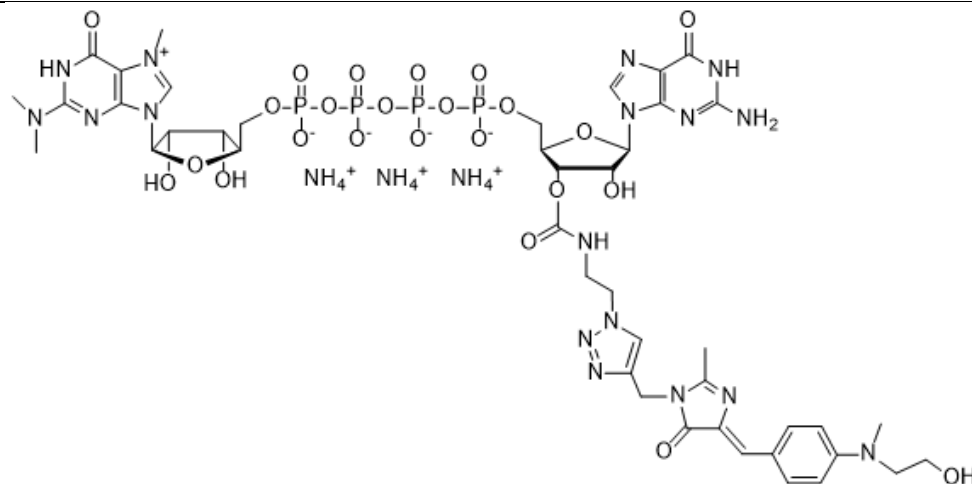

RP-HPLC (conditions c)

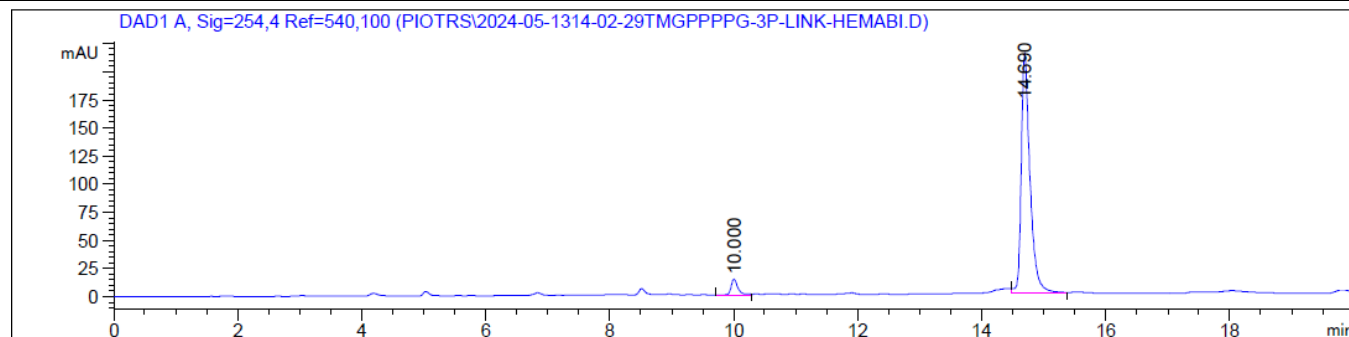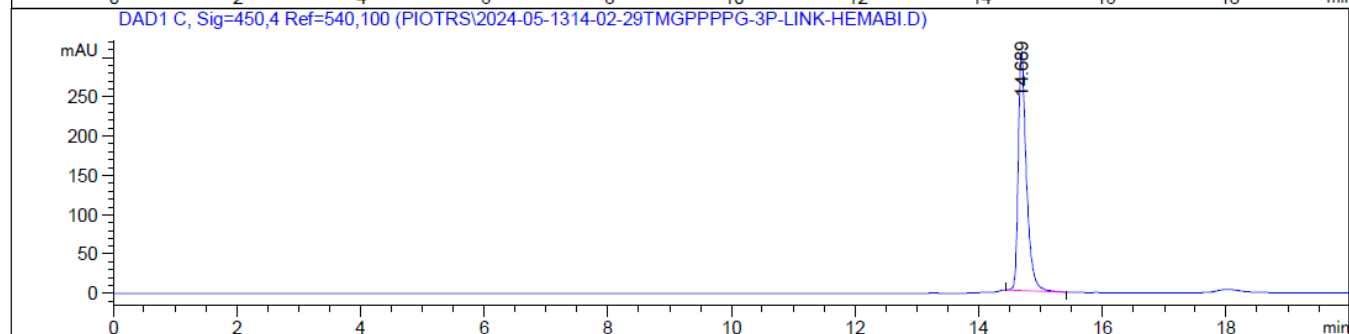

220114\_PSU\_09 #156-246 RT: 1.36-2.15 AV: 91 NL: 1.10E6  
T: FTMS - p ESI Full ms [200.0000-2000.0000]

MS (-) ESI (Calc. [M-H]<sup>-</sup> C<sub>43</sub>H<sub>56</sub>N<sub>17</sub>O<sub>24</sub>P<sub>4</sub> : 1318.2640, found : 1318.26371)

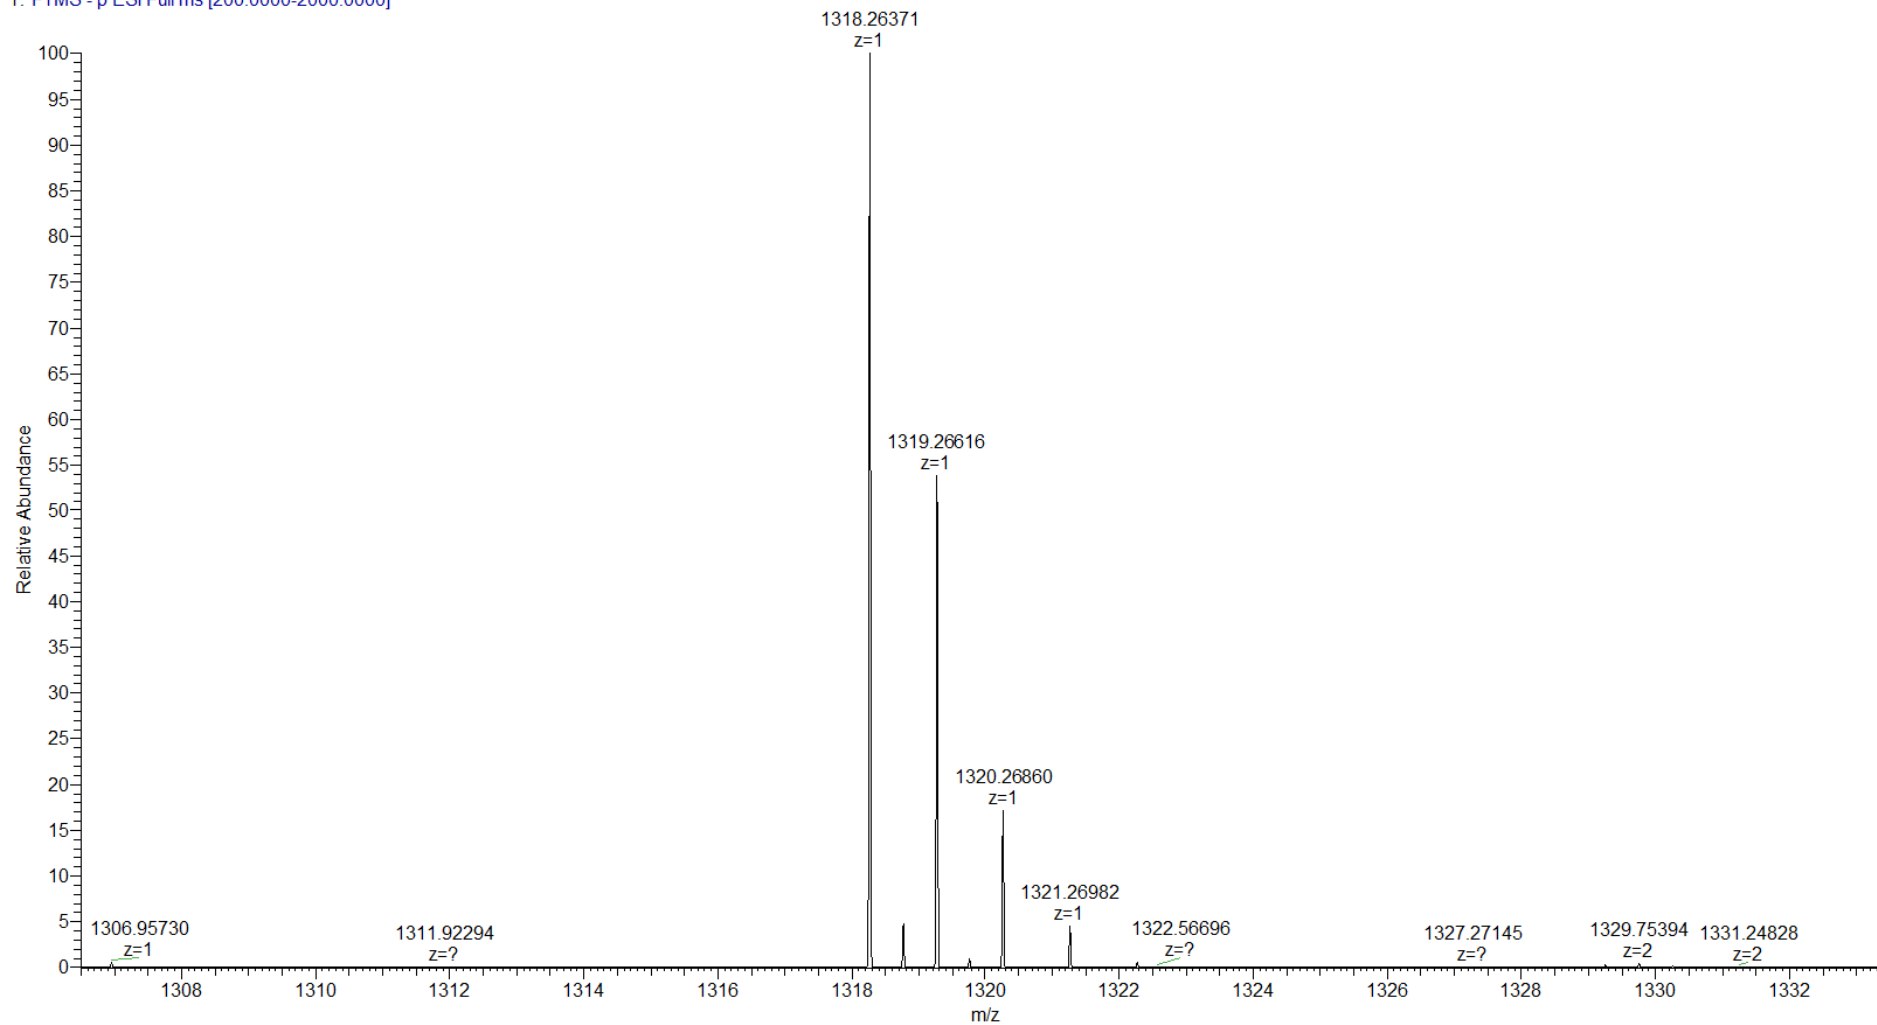



Compound 6a: TMGppppA-2'+3'-O-C(O)-NH-CH<sub>2</sub>-CH<sub>2</sub>-triazole-CH<sub>2</sub>-DMHBI (NH<sub>4</sub><sup>+</sup> salt)

Chemical structure

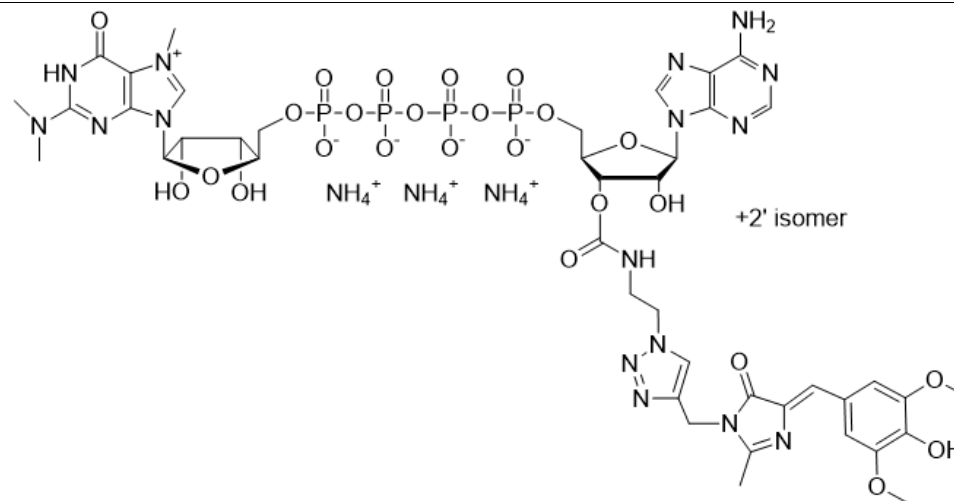

RP-HPLC (conditions c)

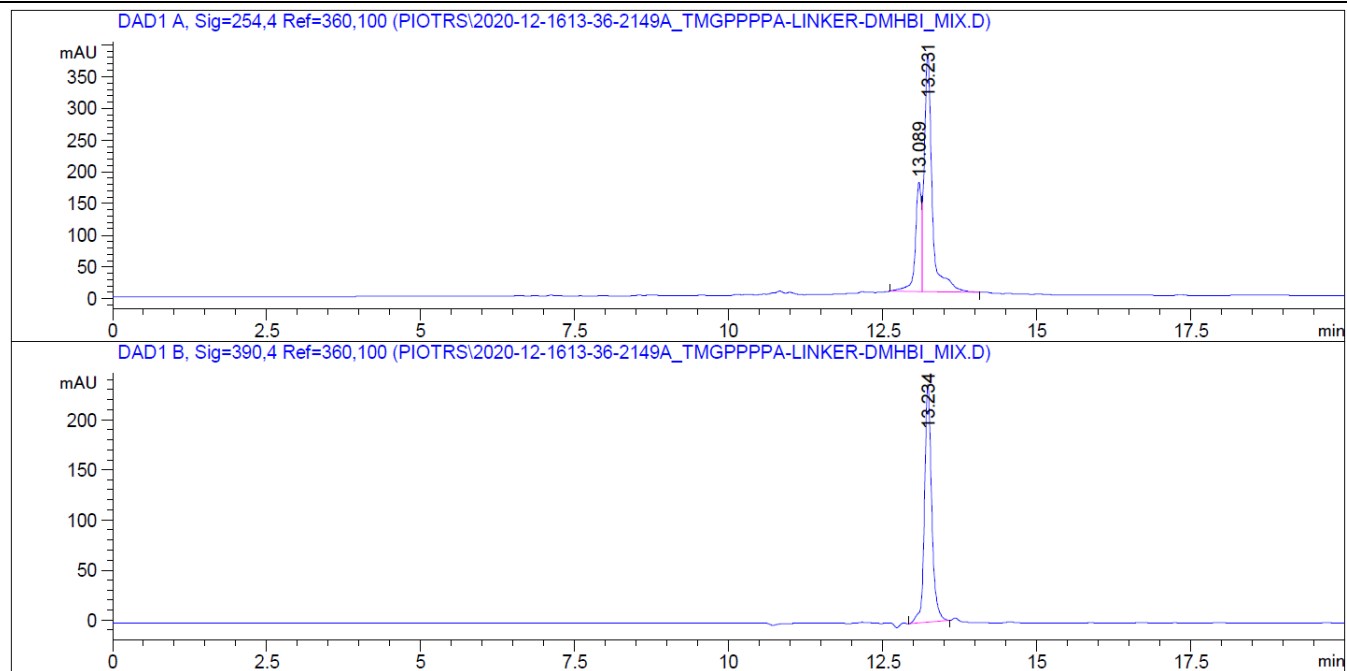

220114\_PSU\_18b #26-79 RT: 0.23-0.70 AV: 54 NL: 3.61E5  
T: FTMS - p ESI Full ms [200.0000-2000.0000]

MS (-) ESI (Calc. [M-H]<sup>-</sup> C<sub>42</sub>H<sub>53</sub>N<sub>16</sub>O<sub>25</sub>P<sub>4</sub>; 1305.2330, found: 1305.23292)

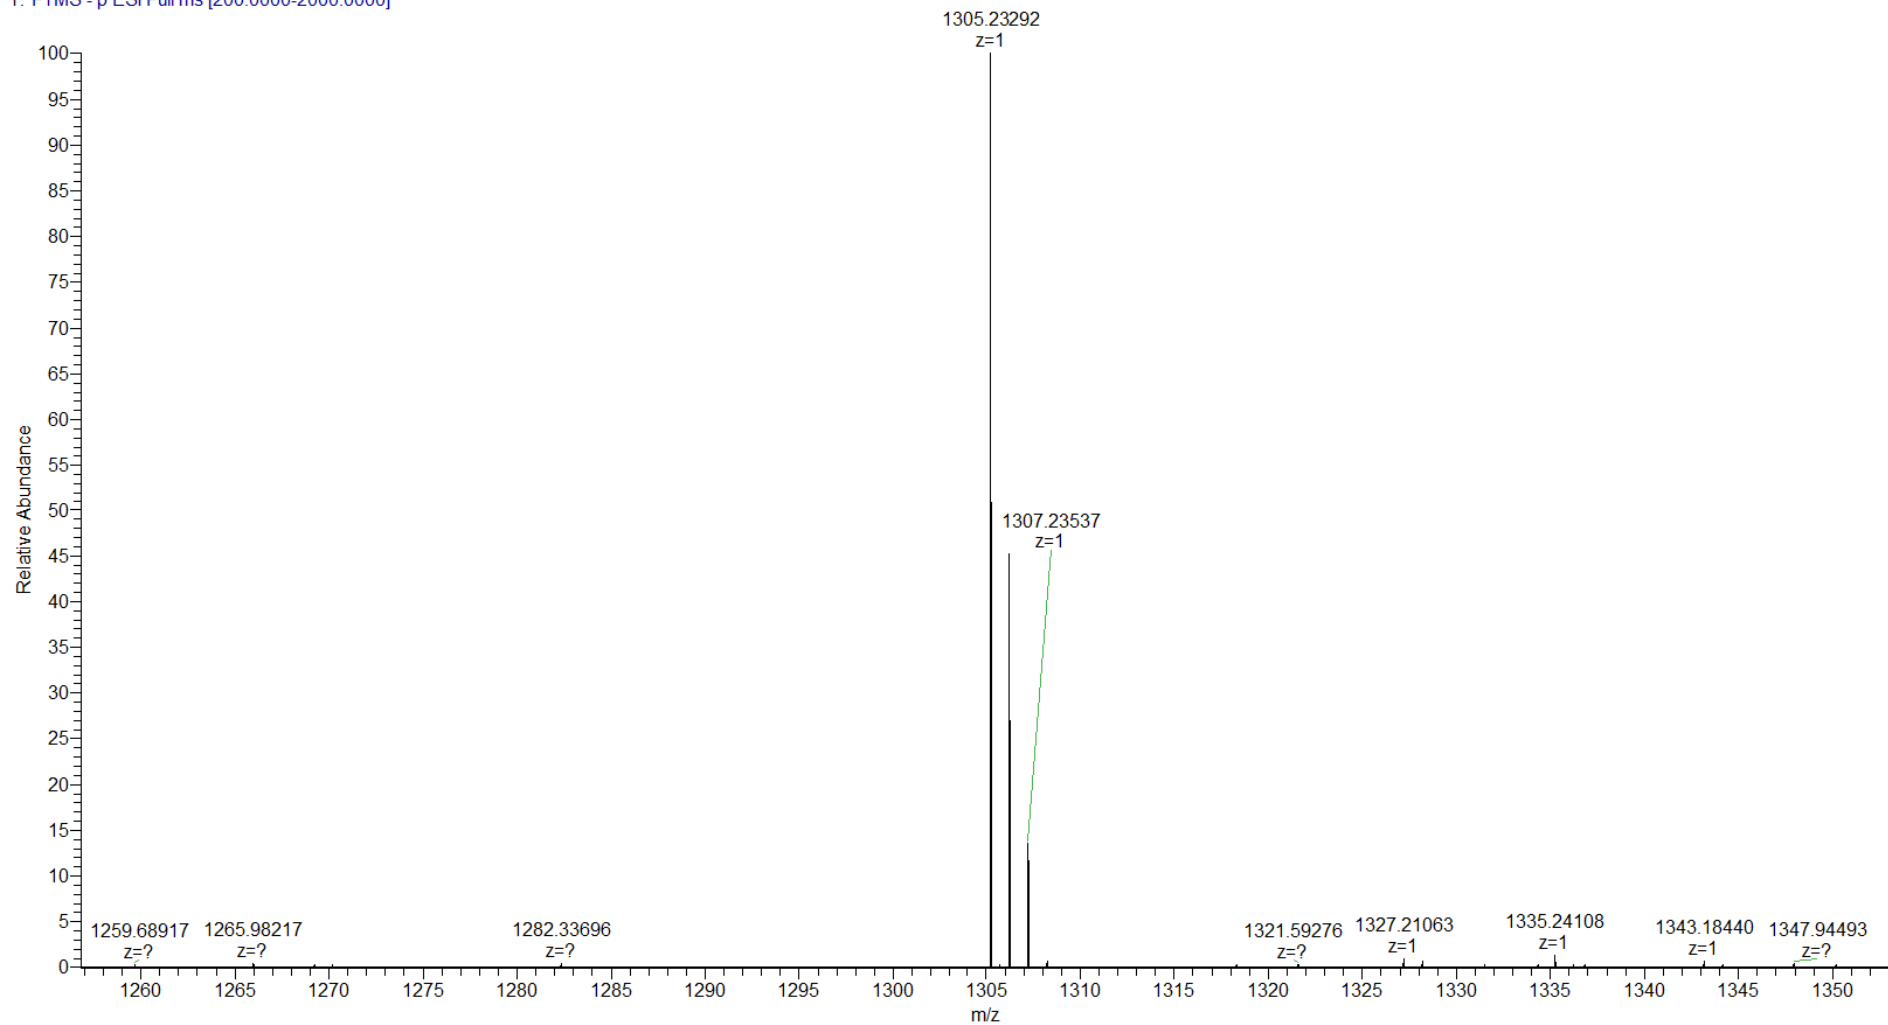

Compound 6c: TMGppppA-2'+3'-O-C(O)-NH-CH<sub>2</sub>-CH<sub>2</sub>-triazole-CH<sub>2</sub>-HEMABI (NH<sub>4</sub><sup>+</sup> salt)

Chemical structure

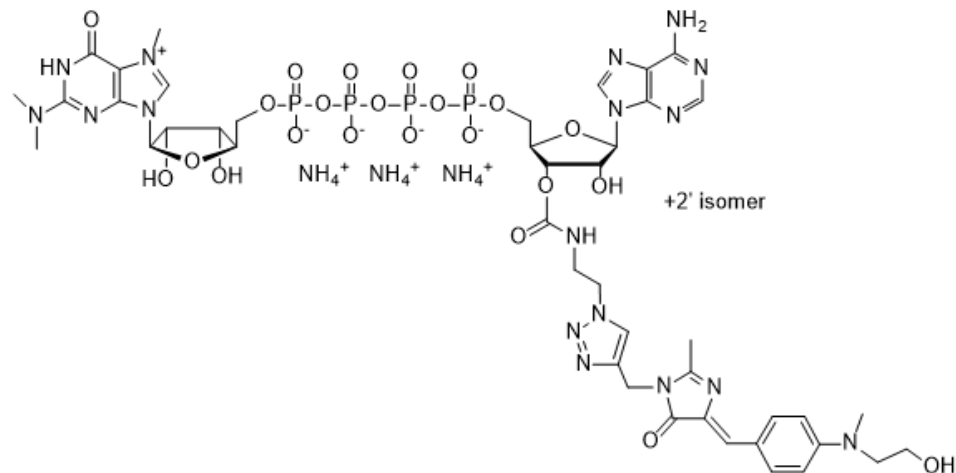

RP-HPLC (conditions c)

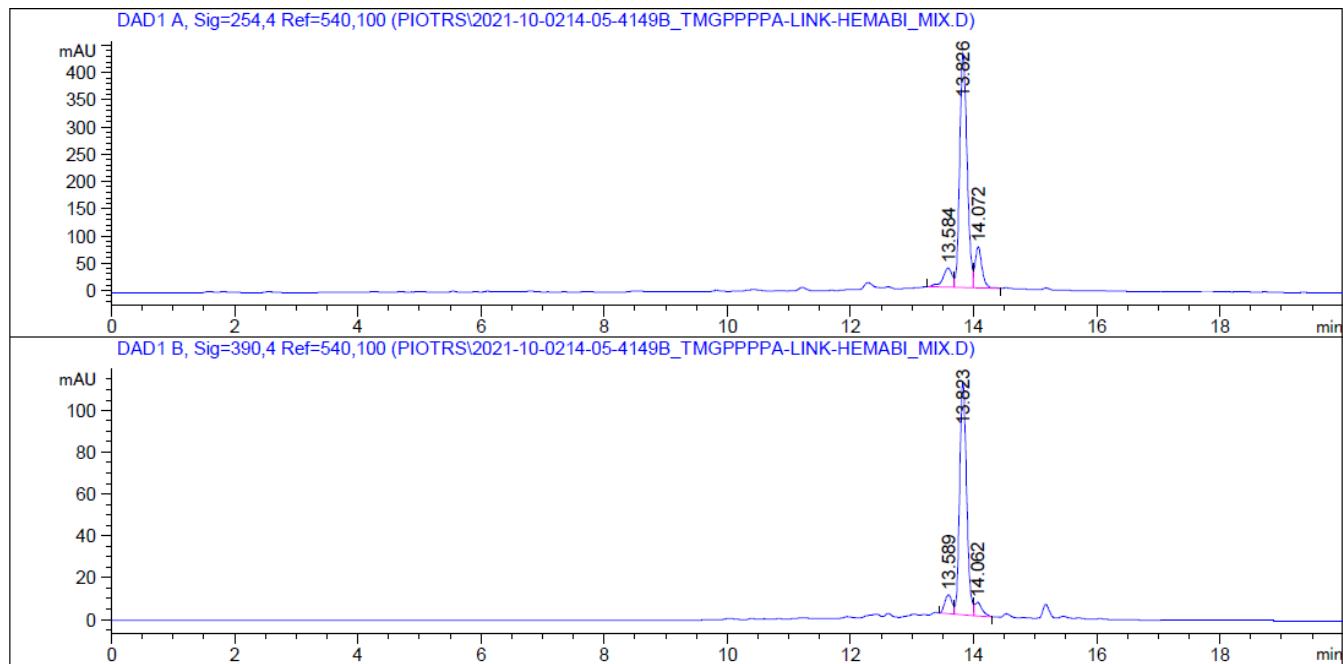

220214\_PSu\_49c #101-174 RT: 0.89-1.53 AV: 74 NL: 1.49E6  
T: FTMS - p ESI Full ms [160.0000-2000.0000]

MS (-) ESI (Calc. [M-H]<sup>-</sup> C<sub>43</sub>H<sub>56</sub>N<sub>17</sub>O<sub>23</sub>P<sub>4</sub> : 1302.2691, found: 1302.26991)

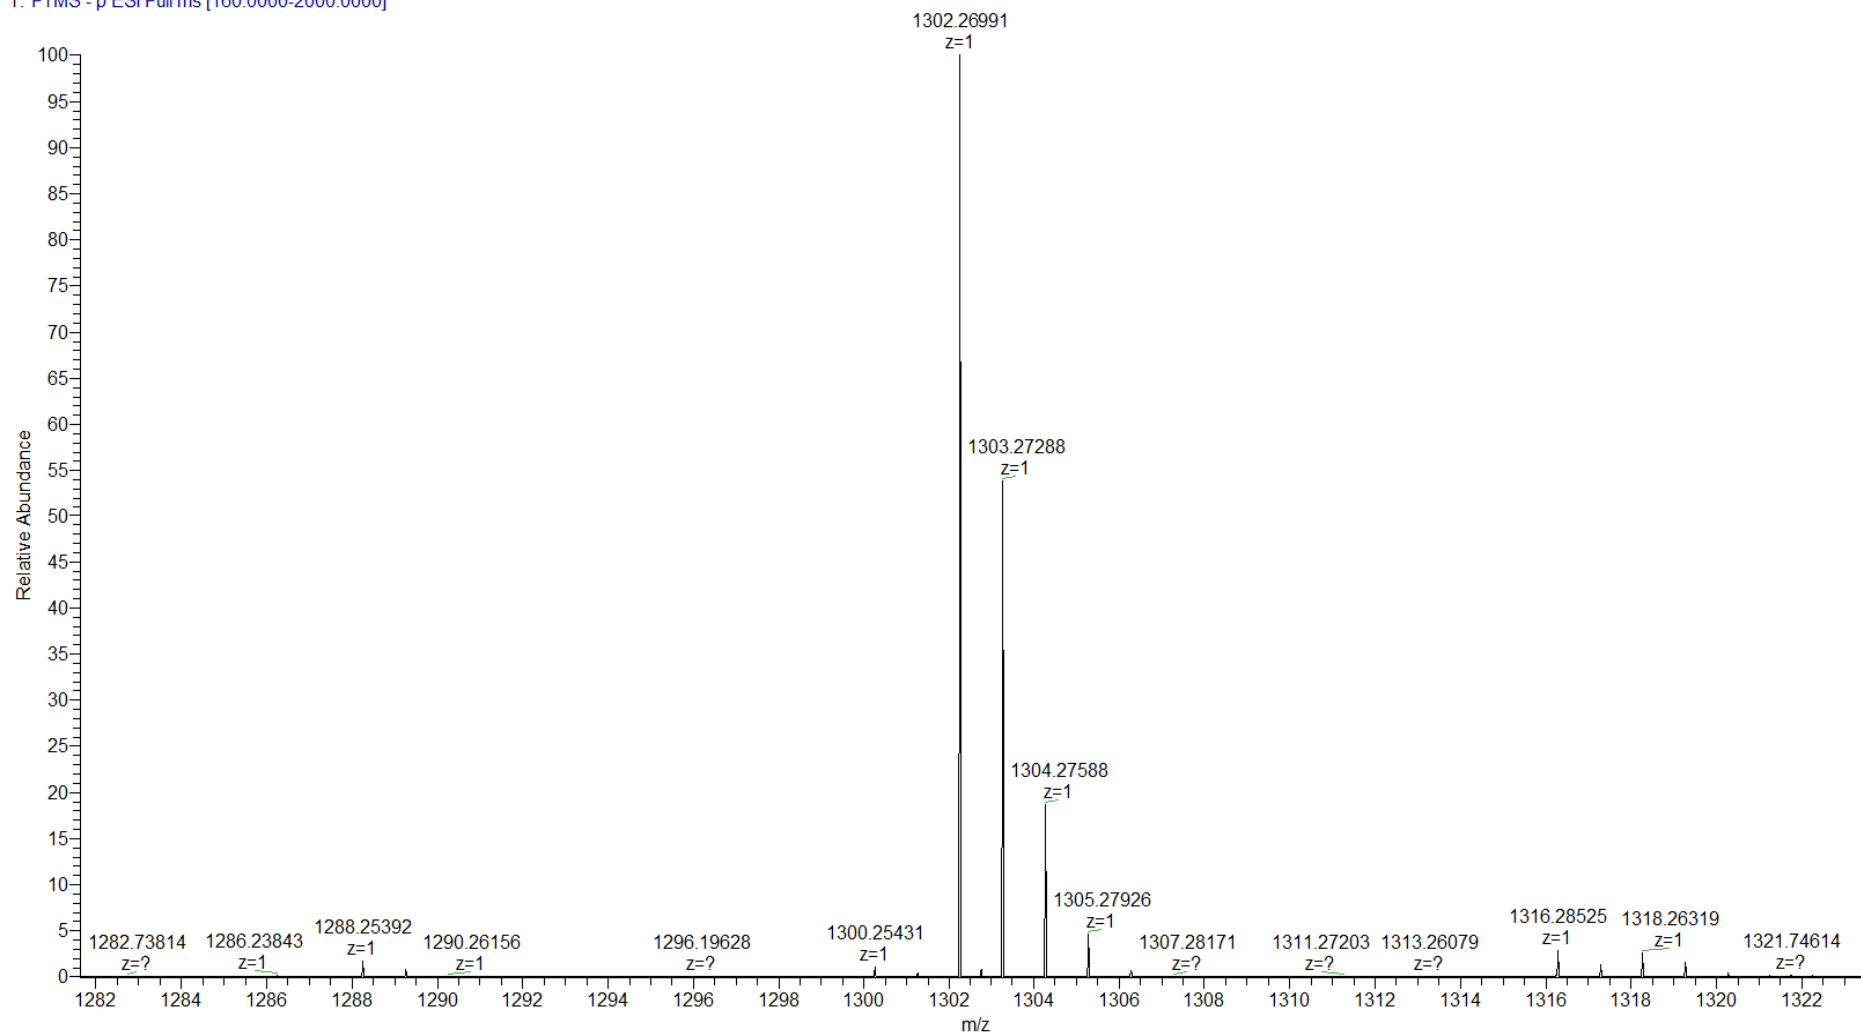

Compound 7a-2': TMGppp-5'-SG-2'-O-C(O)-NH-CH<sub>2</sub>-triazole-CH<sub>2</sub>CH<sub>2</sub>-DMHBI (NH<sub>4</sub><sup>+</sup> salt)

Chemical structure

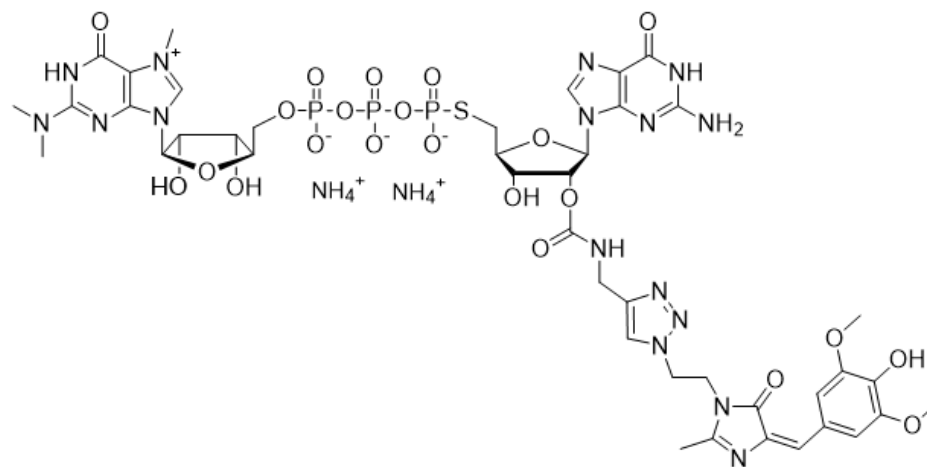

RP-HPLC (conditions c)

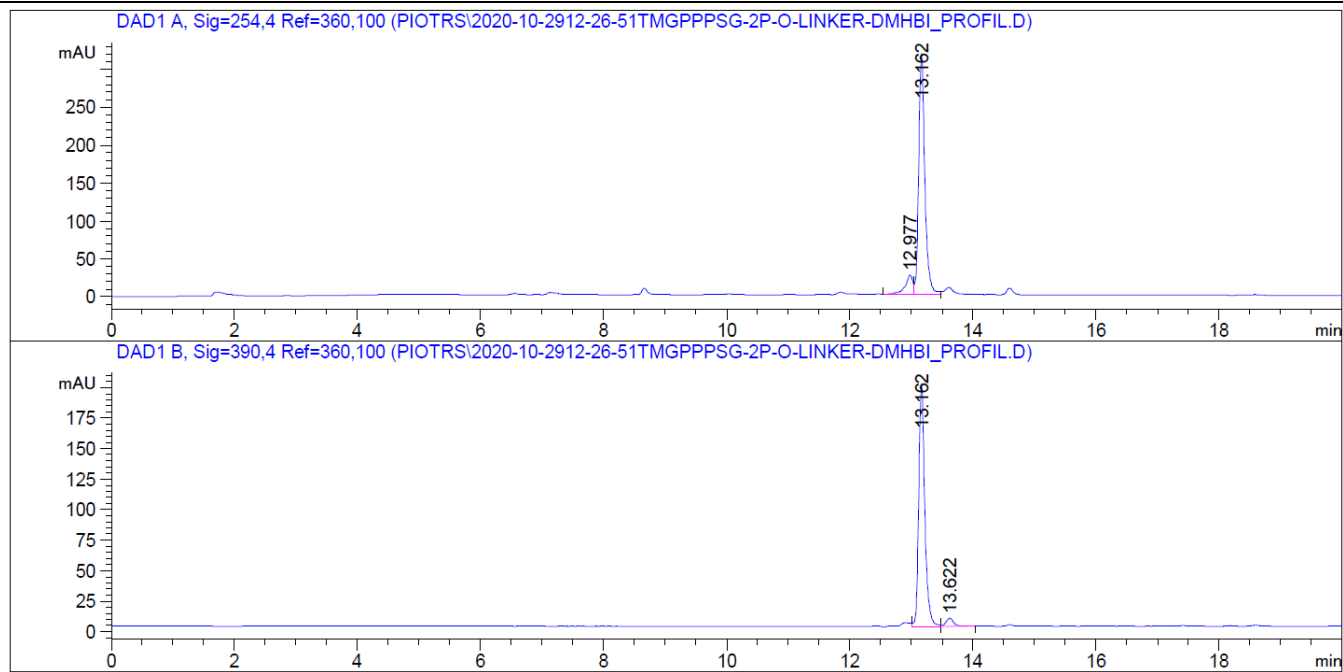

220331\_PSu\_07 #198-251 RT: 1.73-2.19 AV: 54 NL: 1.12E7  
T: FTMS - p ESI Full ms [160.0000-2000.0000]

MS (-) ESI (Calc. [M-H]<sup>-</sup> C<sub>42</sub>H<sub>52</sub>N<sub>16</sub>O<sub>22</sub>P<sub>3</sub>S<sup>-</sup> : 1257.23811, found: 1257.23940)

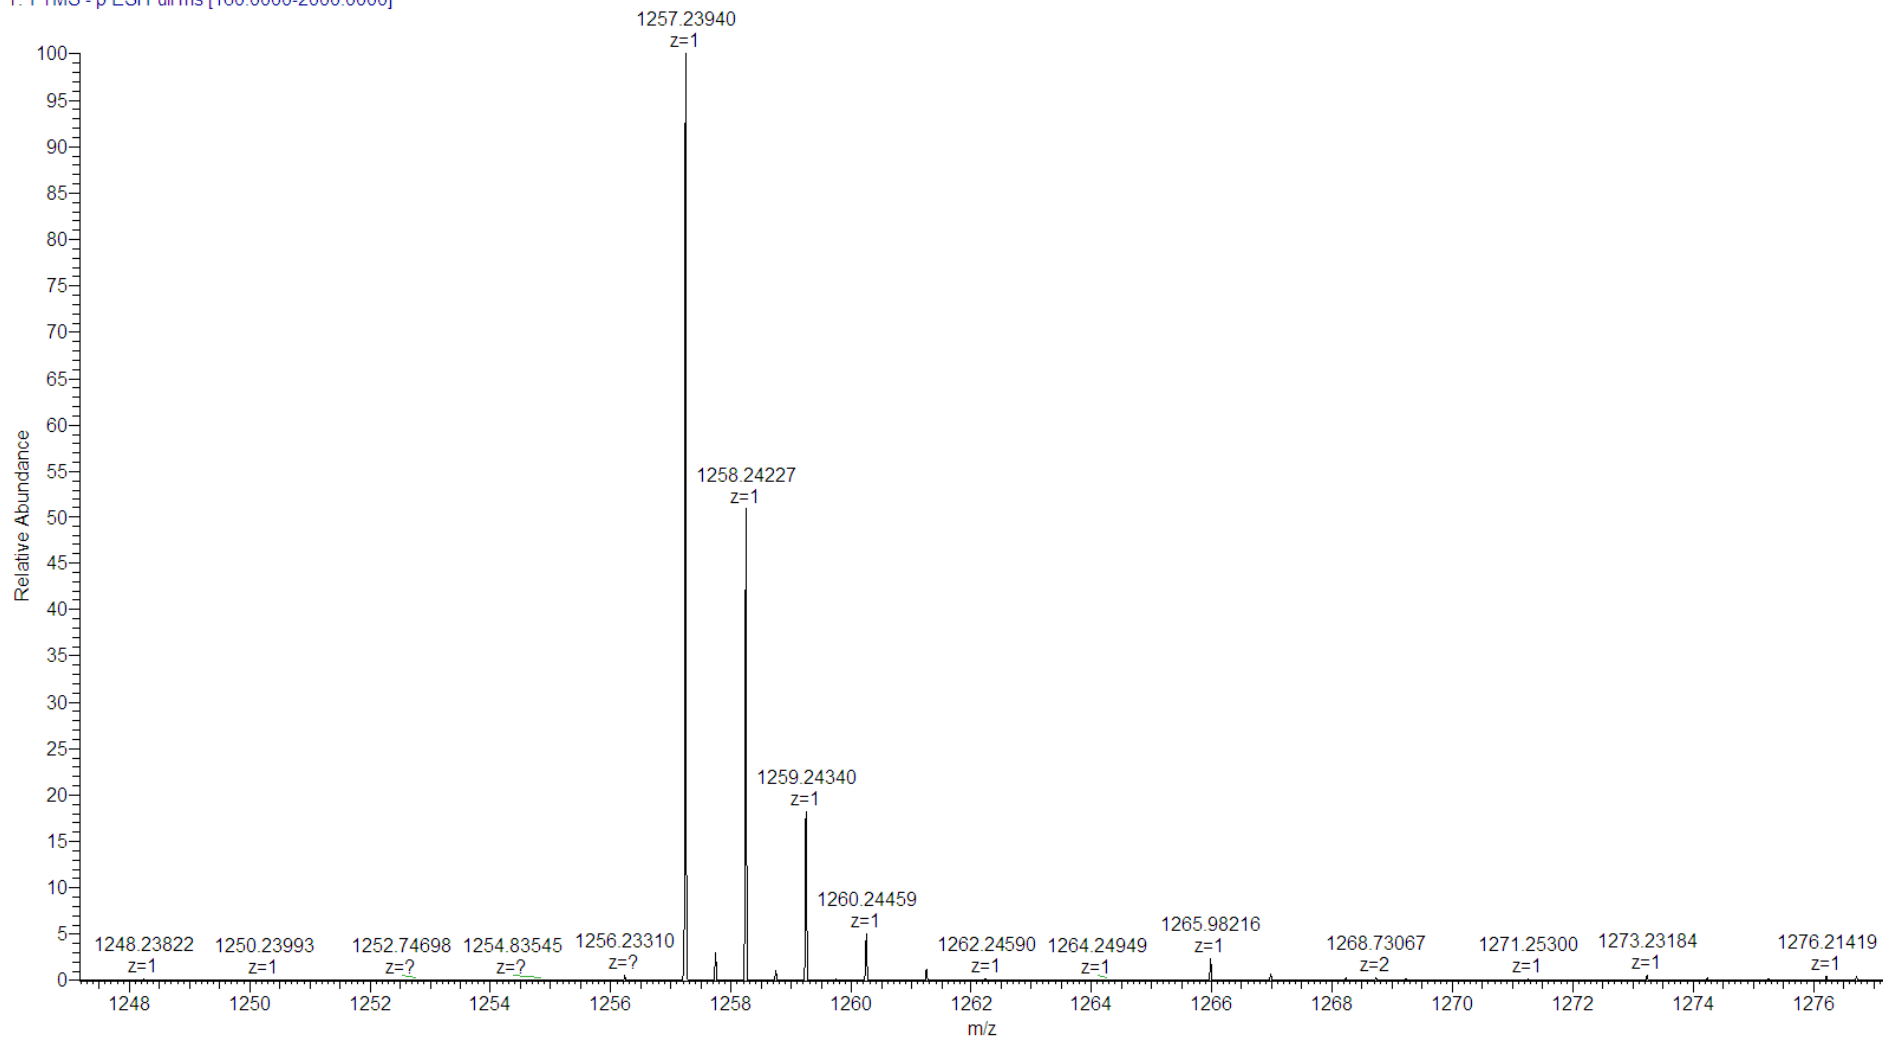

Compound 7a-3': TMGppp-5'-SG-3'-O-C(O)-NH-CH<sub>2</sub>-triazole-CH<sub>2</sub>CH<sub>2</sub>-DMHBI (NH<sub>4</sub><sup>+</sup> salt)

Chemical structure

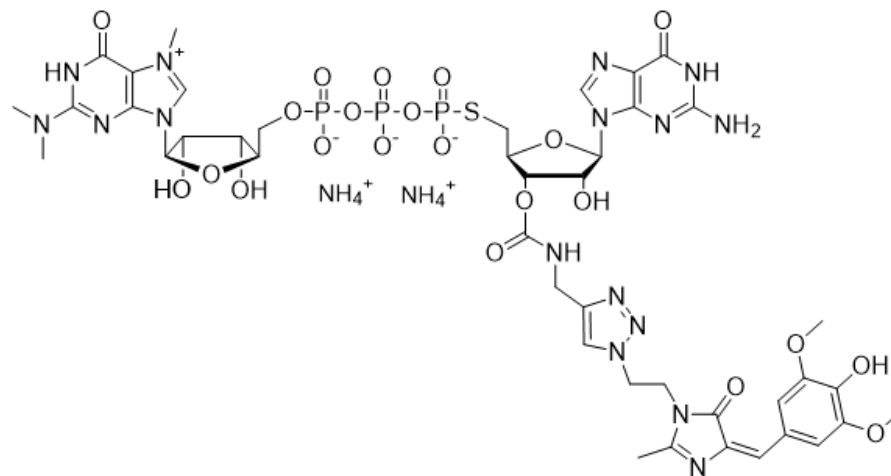

RP-HPLC (conditions c)

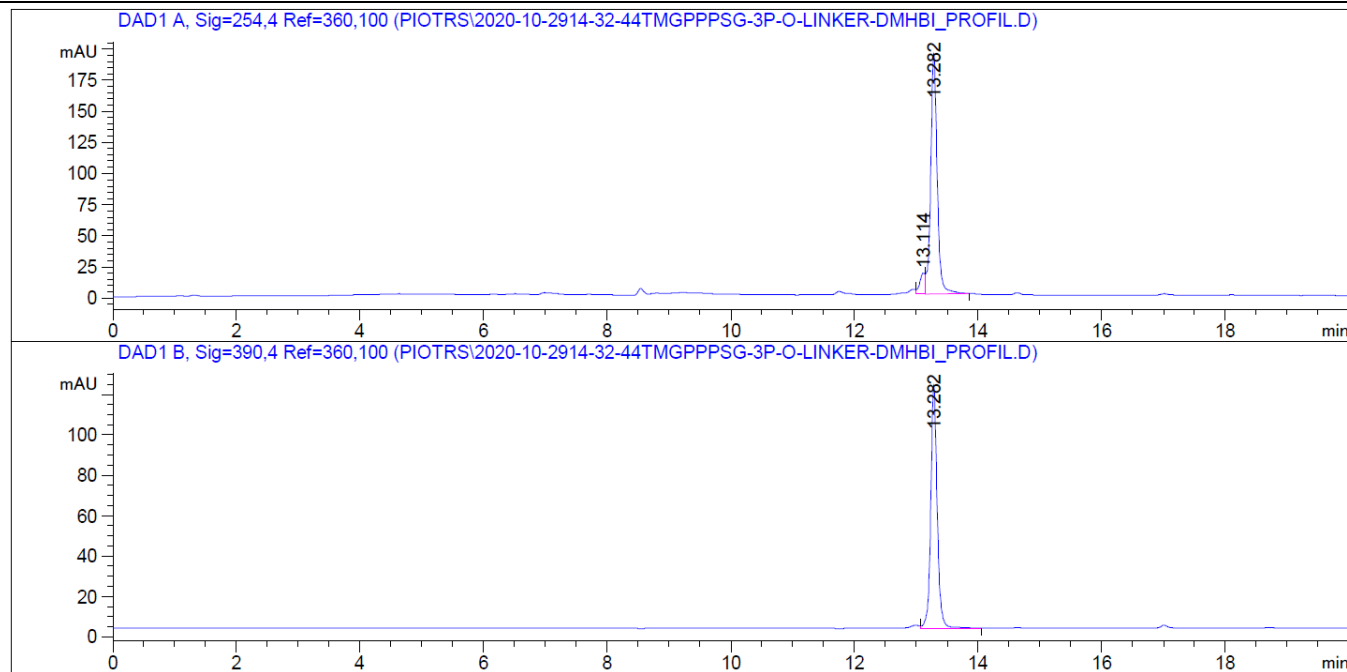

201119\_PSu\_05 #57-194 RT: 0.58-1.93 AV: 138 NL: 1.39E6  
T: FTMS - p ESI Full ms [150.0000-2000.0000]

MS (-) ESI (Calc. [M-H]<sup>-</sup> C<sub>42</sub>H<sub>52</sub>N<sub>16</sub>O<sub>22</sub>P<sub>3</sub>S<sup>-</sup> : 1257.23811, found: 1257.23962)

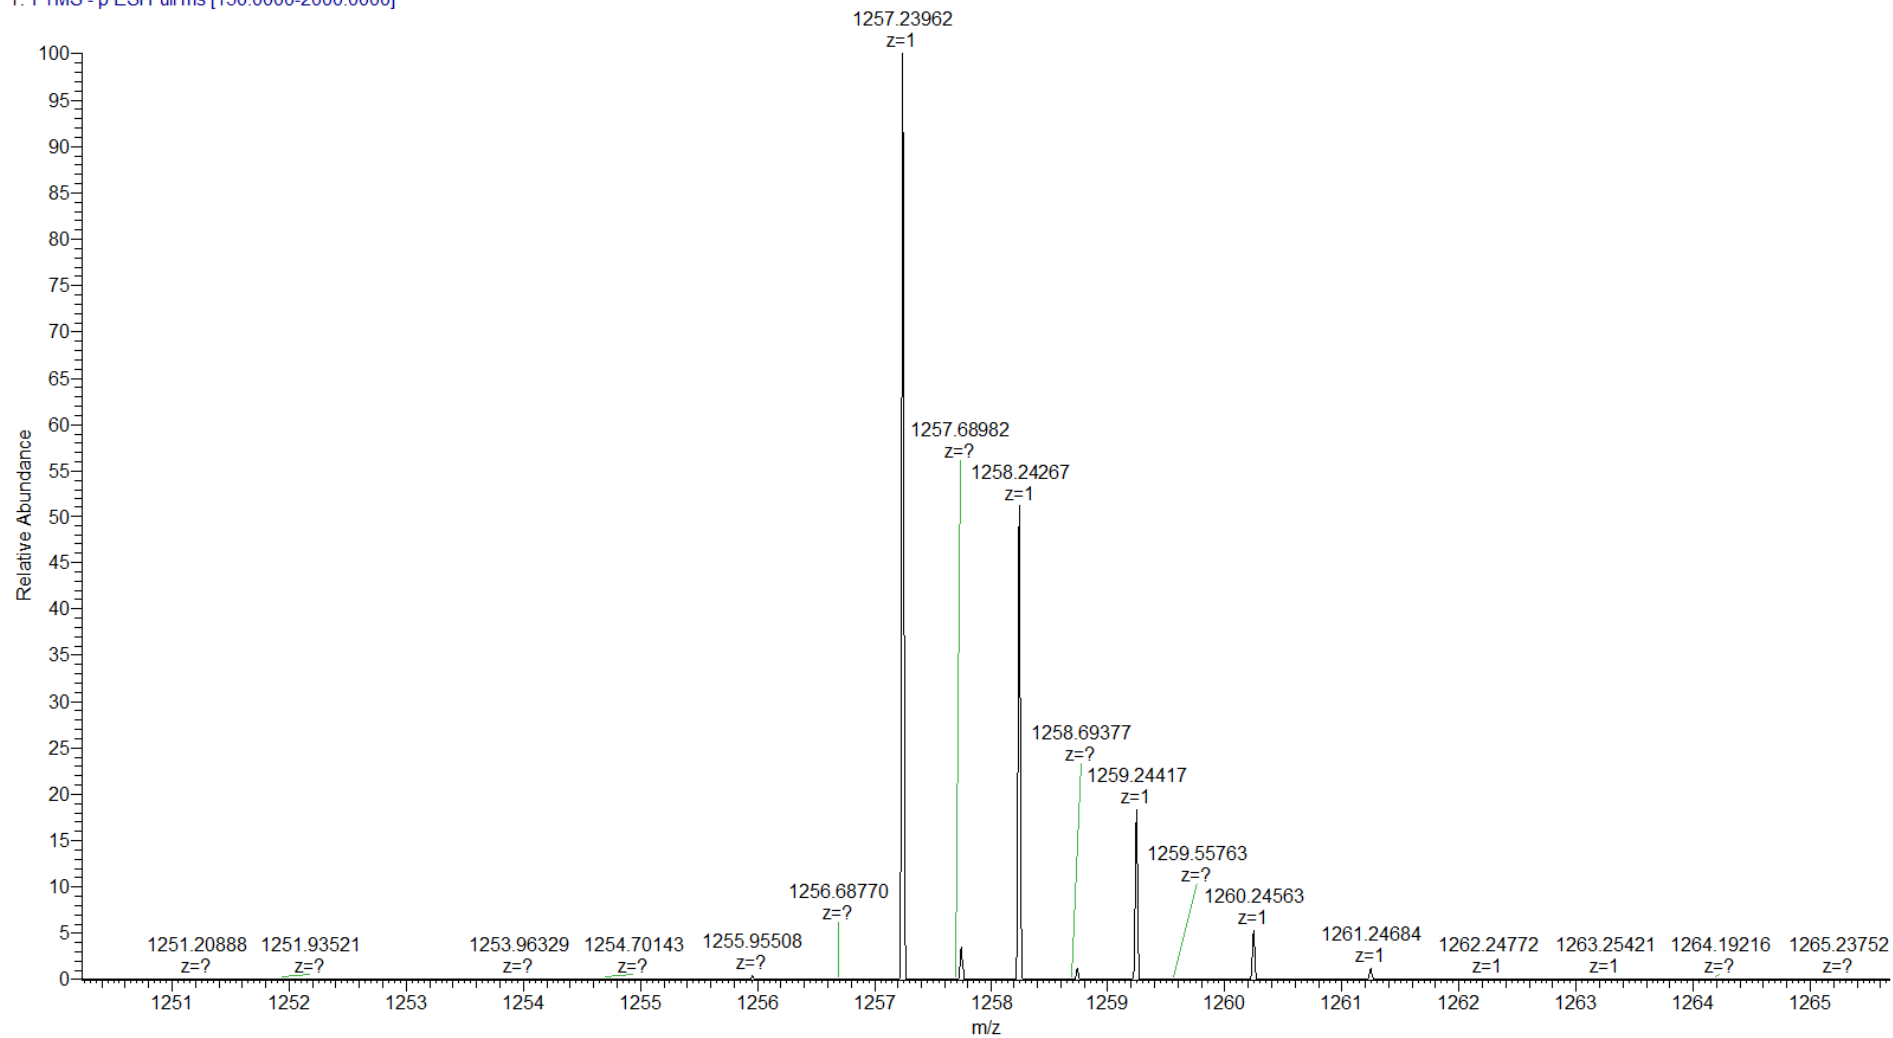



Compound 7b-2': TMGppp-5'-SG-2'-O-C(O)-NH-CH<sub>2</sub>-triazole-CH<sub>2</sub>CH<sub>2</sub>-oHBI (NH<sub>4</sub><sup>+</sup> salt)

Chemical structure

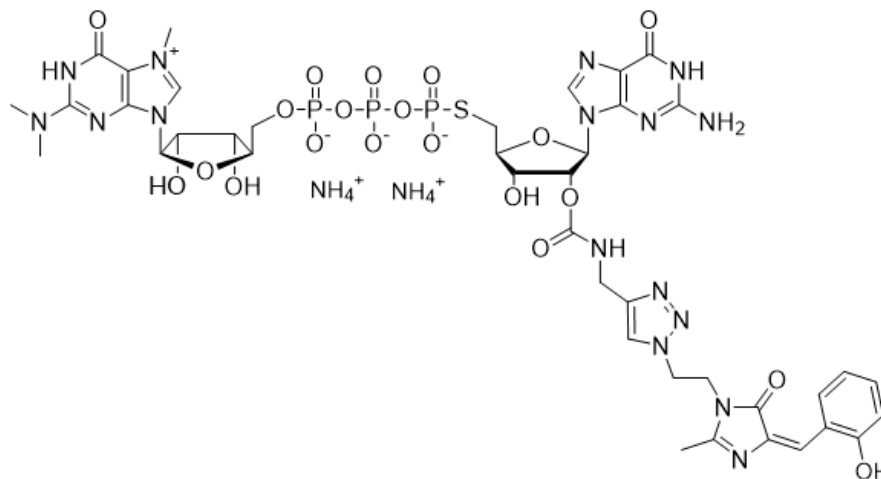

RP-HPLC (conditions c)

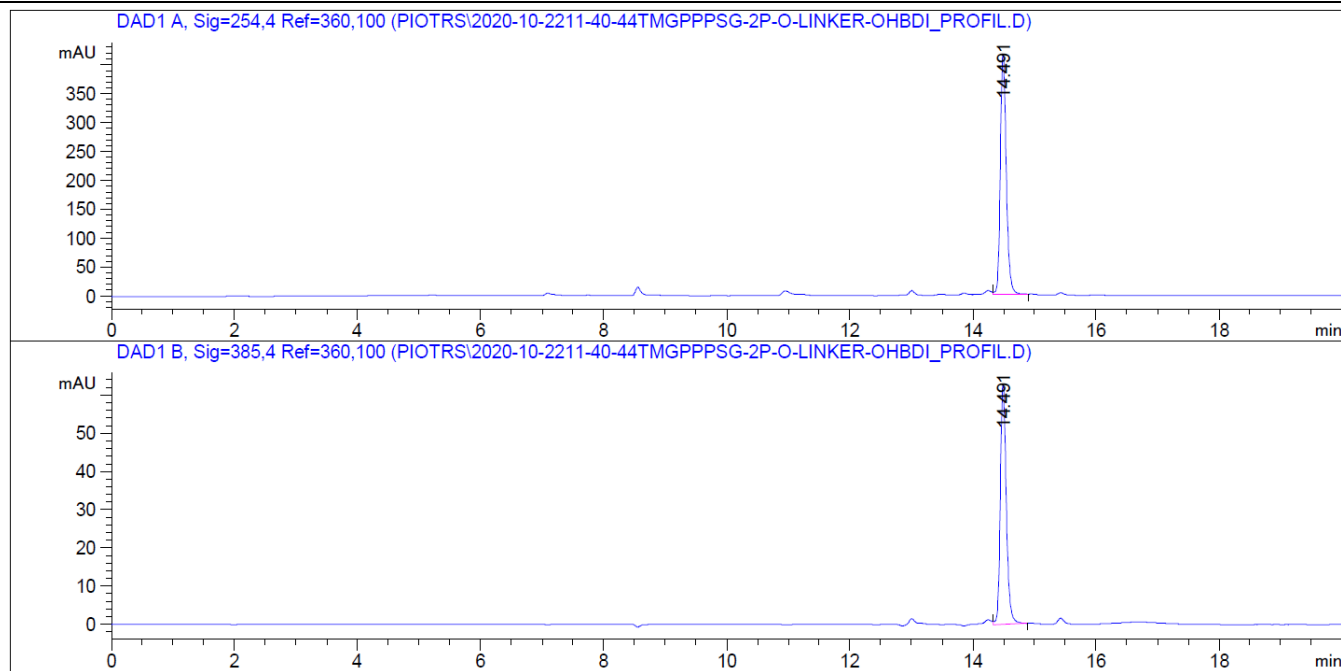

201119\_PSu\_08 #44-72 RT: 0.42-0.69 AV: 29 NL: 1.47E7  
T: FTMS - p ESI Full ms [150.0000-2000.0000]

MS (-) ESI (Calc. [M-H]<sup>-</sup> C<sub>40</sub>H<sub>48</sub>N<sub>16</sub>O<sub>20</sub>P<sub>3</sub>S<sup>-</sup> : 1197.21698, found: 1197.21885)

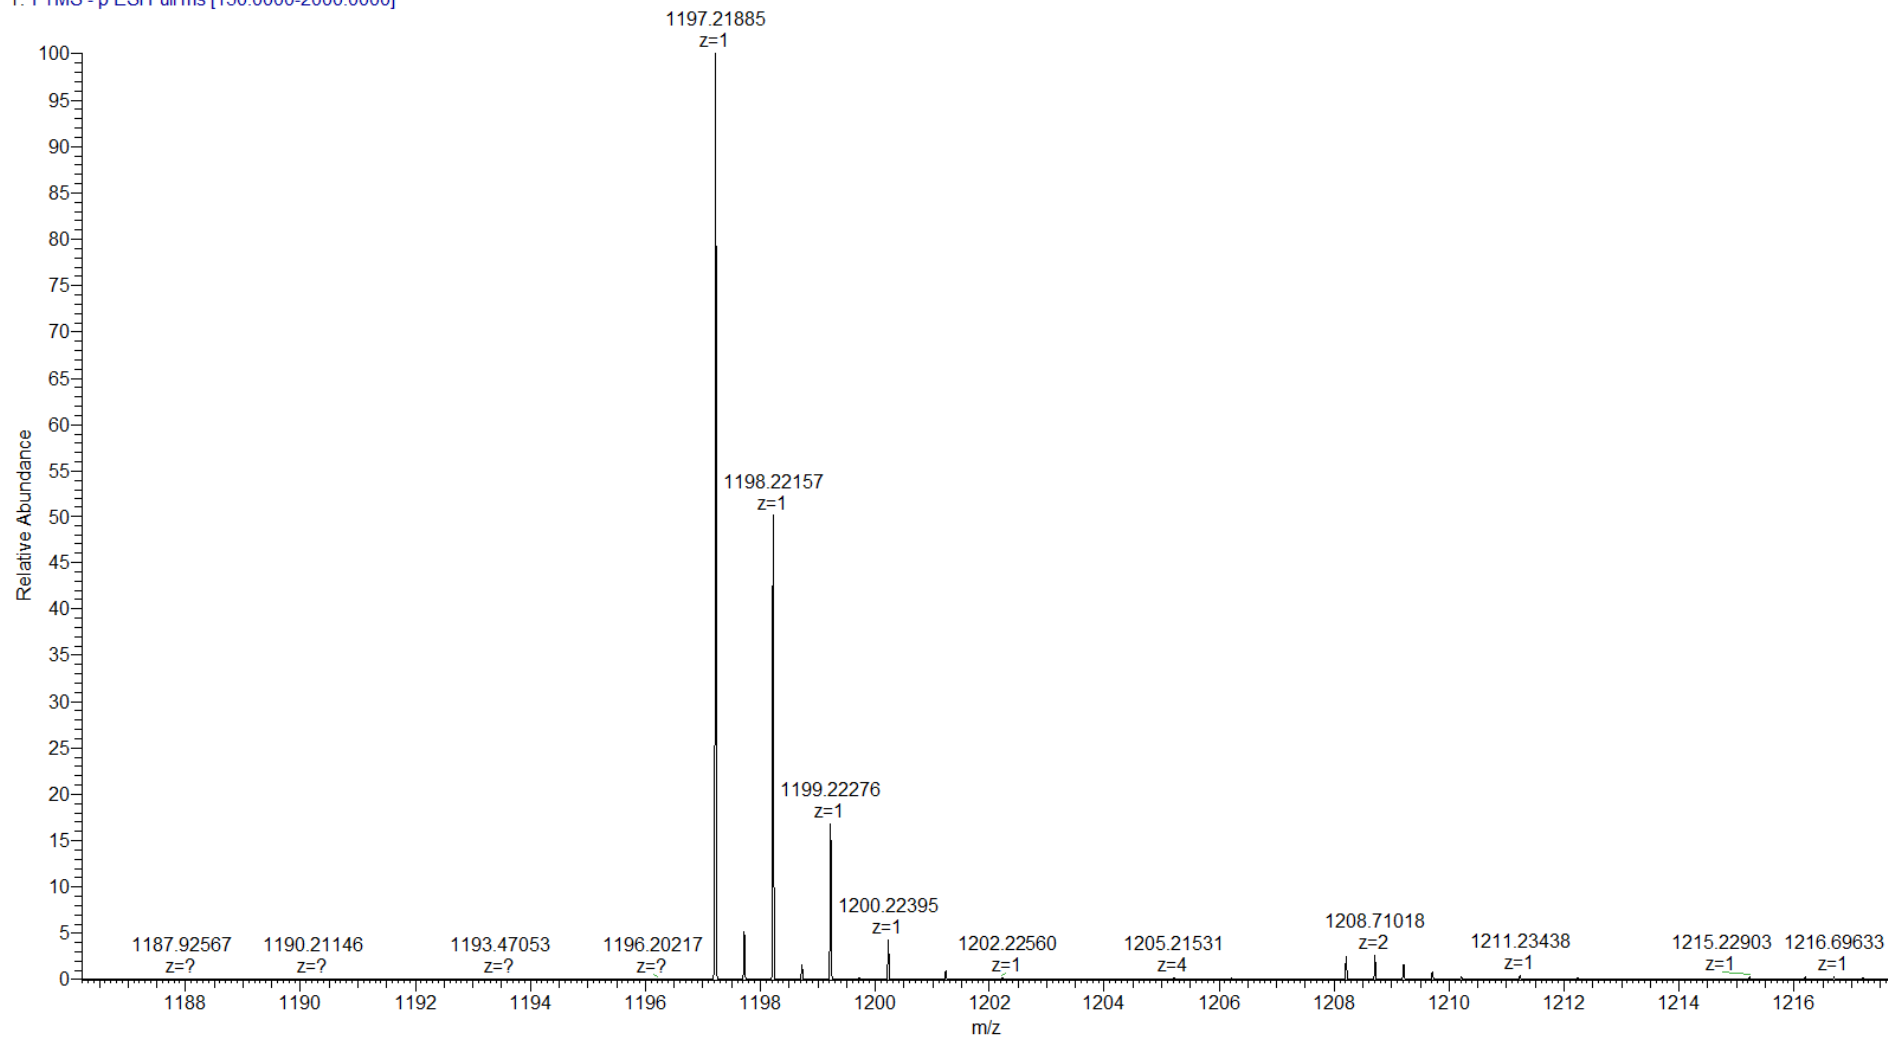

Compound 7b-3': TMGppp-5'-SG-3'-O-C(O)-NH-CH<sub>2</sub>-triazole-CH<sub>2</sub>CH<sub>2</sub>-oHBI (NH<sub>4</sub><sup>+</sup> salt)

Chemical structure

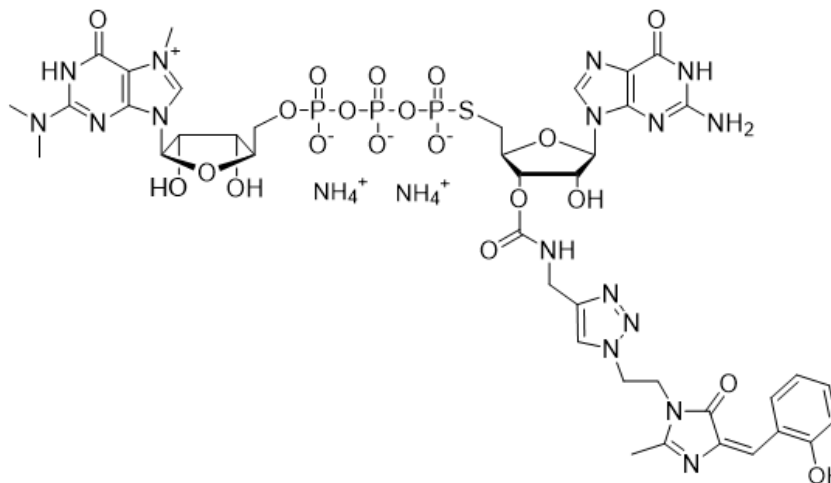

RP-HPLC (conditions c)

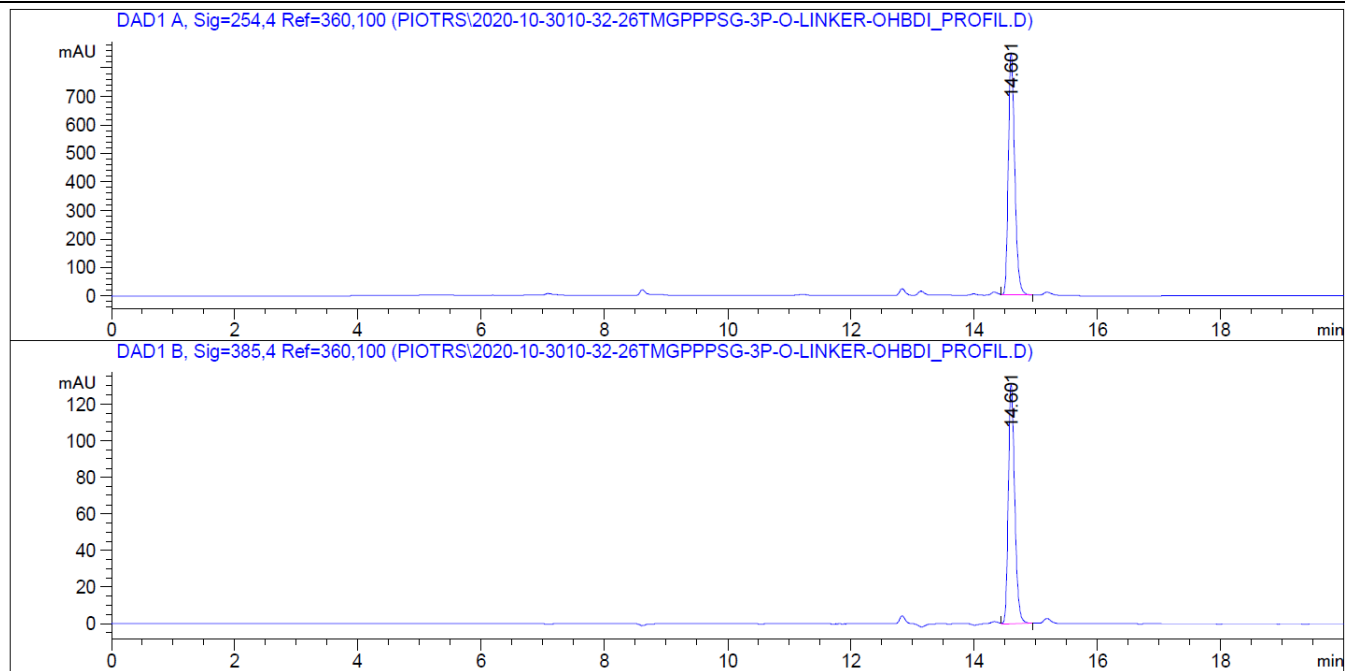

201119\_PSu\_07 #29-84 RT: 0.30-0.83 AV: 56 NL: 1.79E6  
T: FTMS - p ESI Full ms [150.0000-2000.0000]

MS (-) ESI (Calc. [M-H]<sup>-</sup> C<sub>40</sub>H<sub>48</sub>N<sub>16</sub>O<sub>20</sub>P<sub>3</sub>S<sup>-</sup> : 1197.21698, found: 1197.21854)

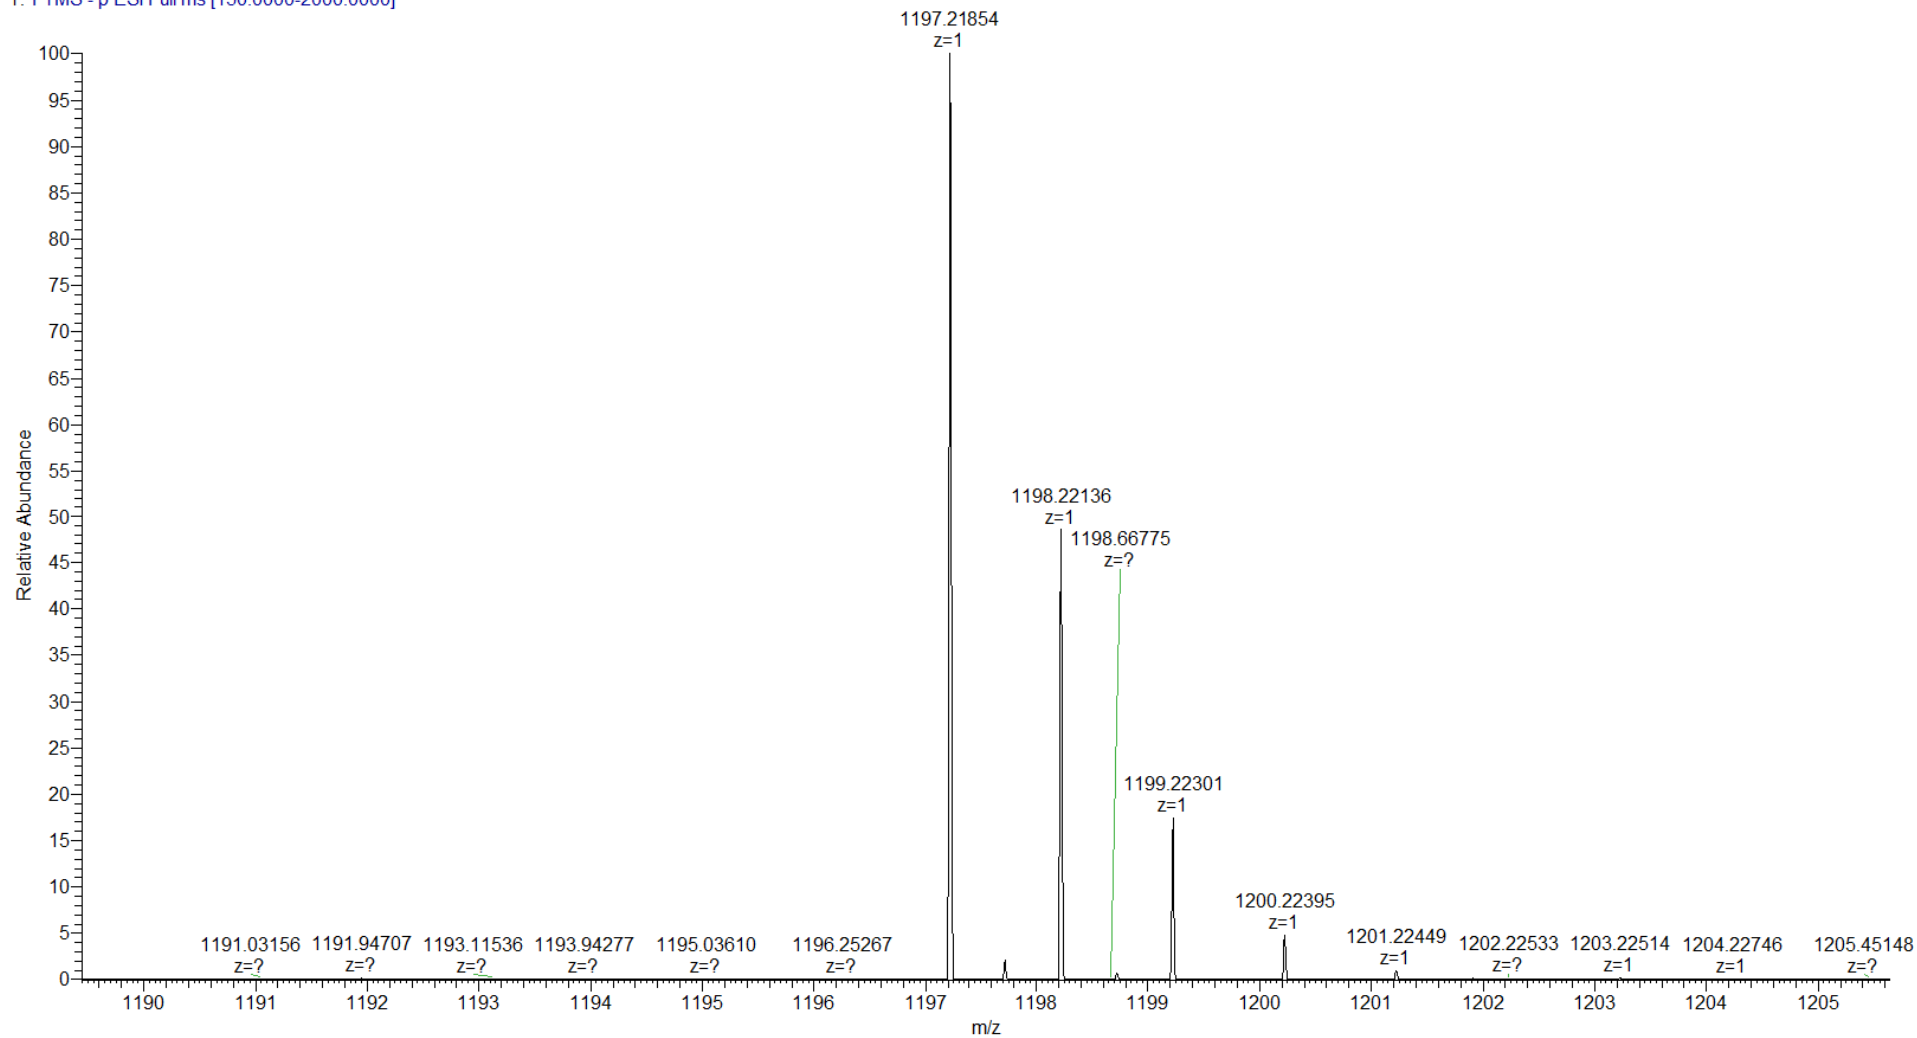

Compound 8a: TMGpppG-N1-CH<sub>2</sub>-triazole-CH<sub>2</sub>CH<sub>2</sub>-DMHBI (NH<sub>4</sub><sup>+</sup> salt)

Chemical structure

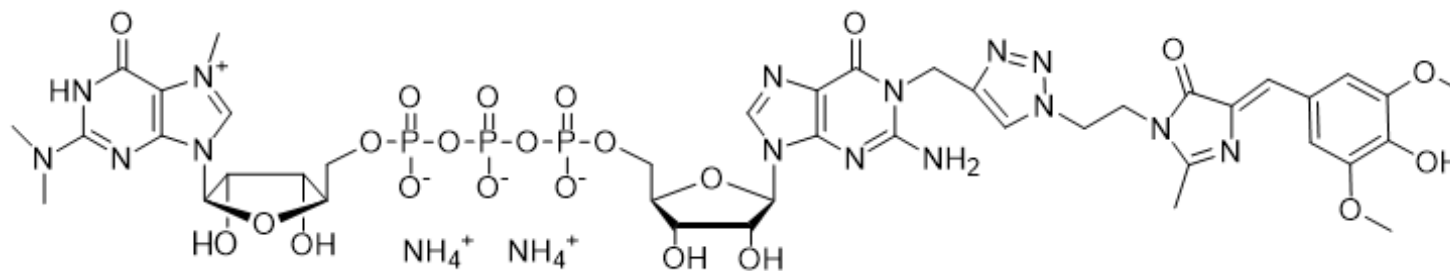

RP-HPLC (conditions c)

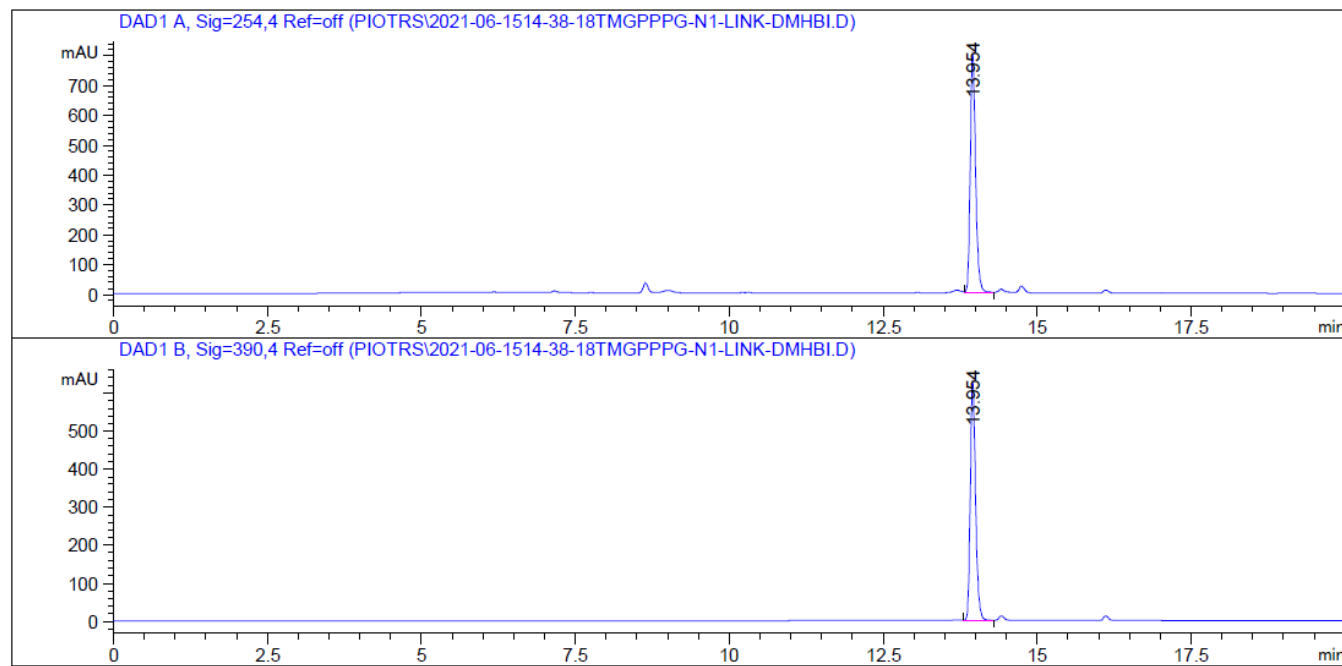

210629\_PSu\_79a #148-229 RT: 1.29-2.00 AV: 82 NL: 2.95E6  
T: FTMS - p ESI Full ms [160.0000-2000.0000]

MS (-) ESI (Calc. [M-H]<sup>-</sup> C<sub>41</sub>H<sub>51</sub>N<sub>15</sub>O<sub>22</sub>P<sub>3</sub> : 1198.25514, found: 1198.25659)

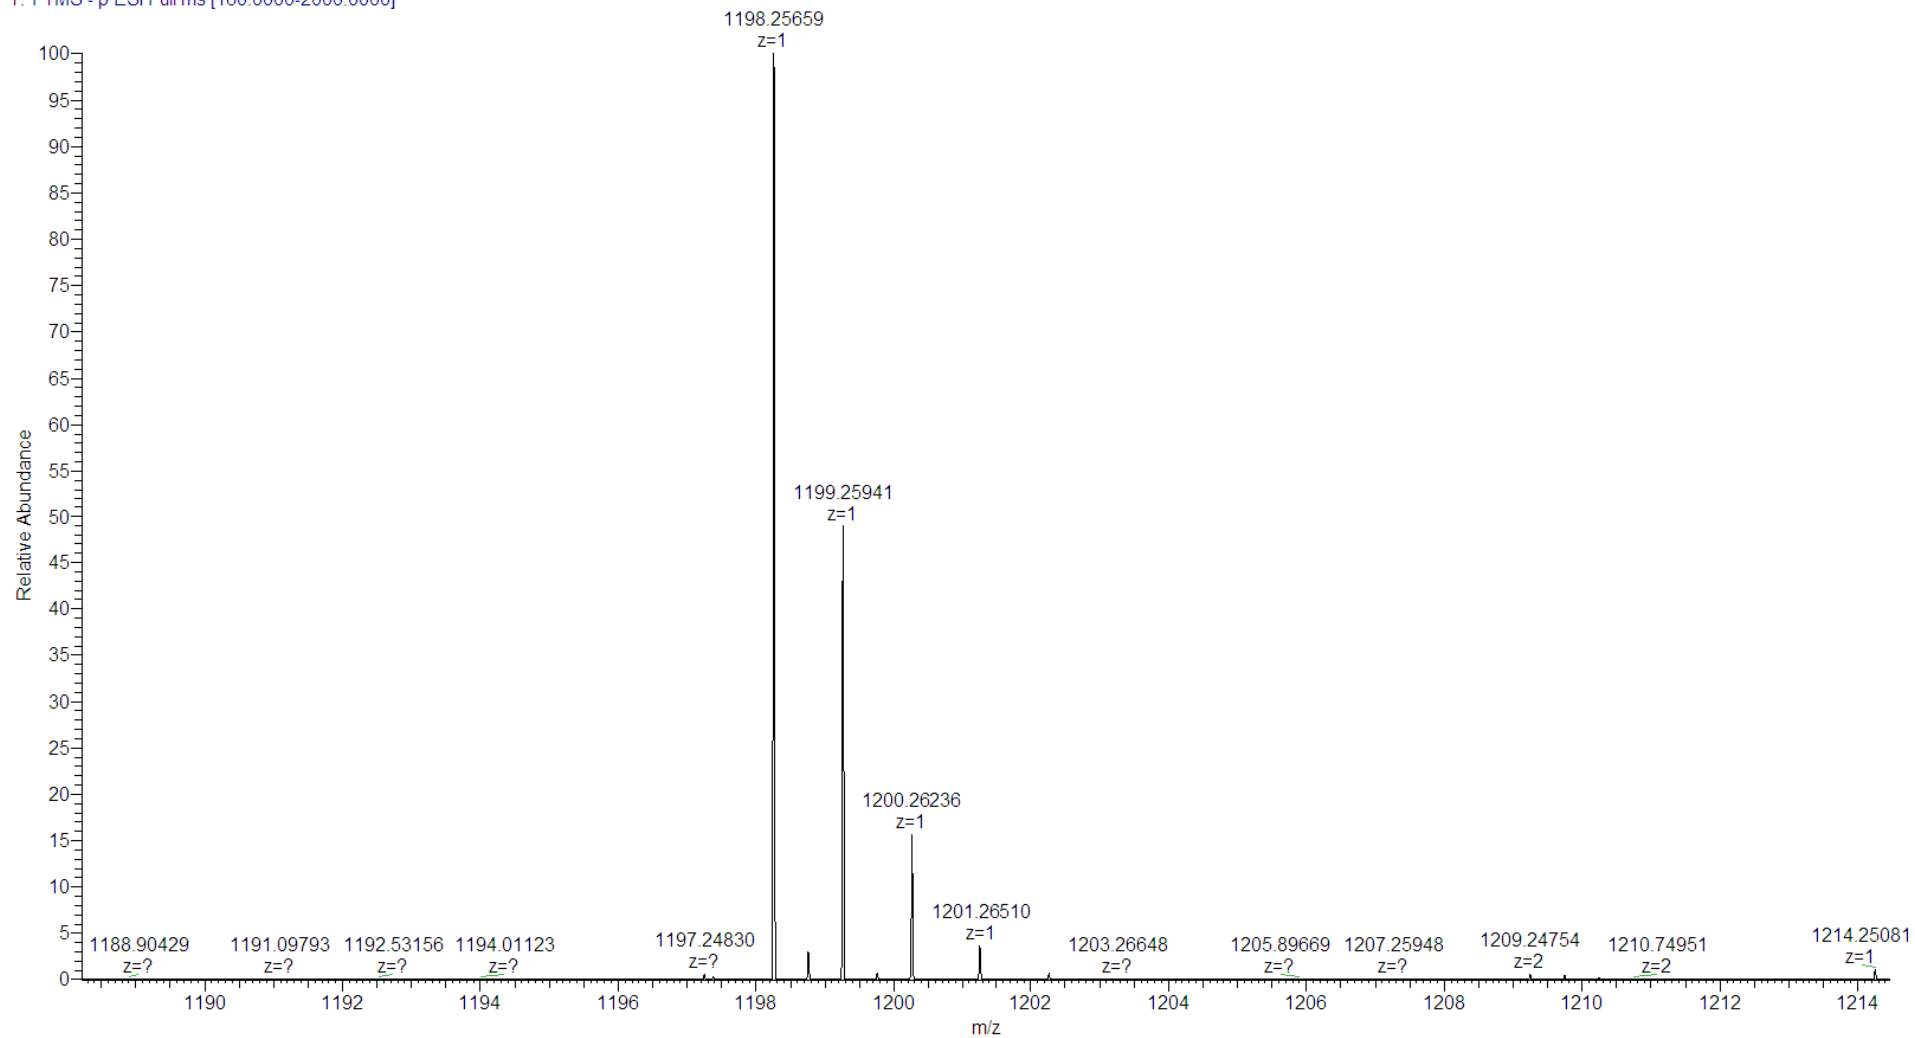

Compound 8b: TMGpppG-N1-CH<sub>2</sub>-triazole-CH<sub>2</sub>CH<sub>2</sub>-oHBI (NH<sub>4</sub><sup>+</sup> salt)

Chemical structure

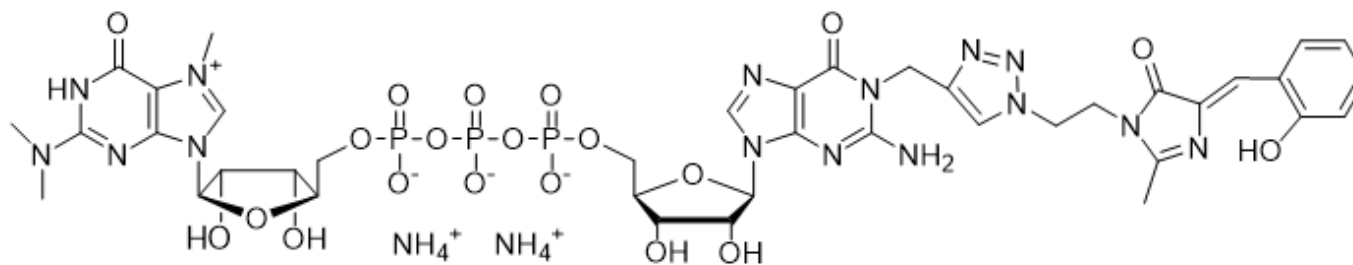

RP-HPLC (conditions c)

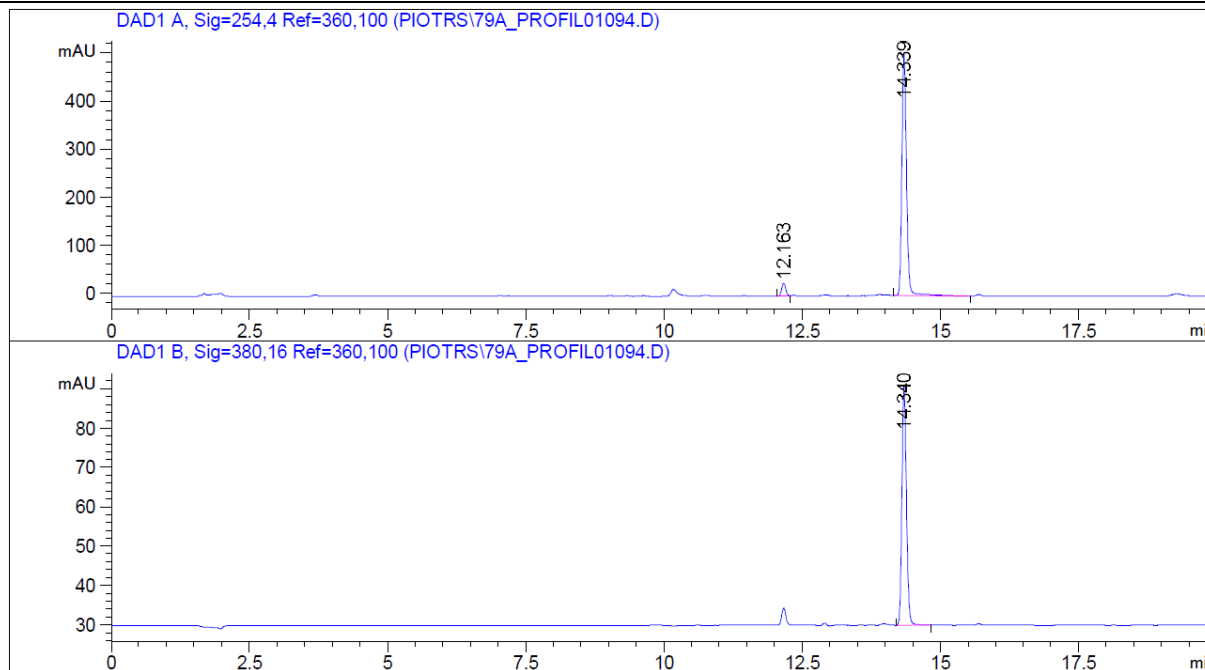

MS (-) ESI (Calc. [M-H]<sup>-</sup> C<sub>39</sub>H<sub>47</sub>N<sub>15</sub>O<sub>20</sub>P<sub>3</sub> : 1138.23401, found: 1138.23492)

220407\_PSu\_04 #249-295 RT: 2.18-2.58 AV: 47 NL: 3.90E7  
T: FTMS - p ESI Full ms [160.0000-2000.0000]

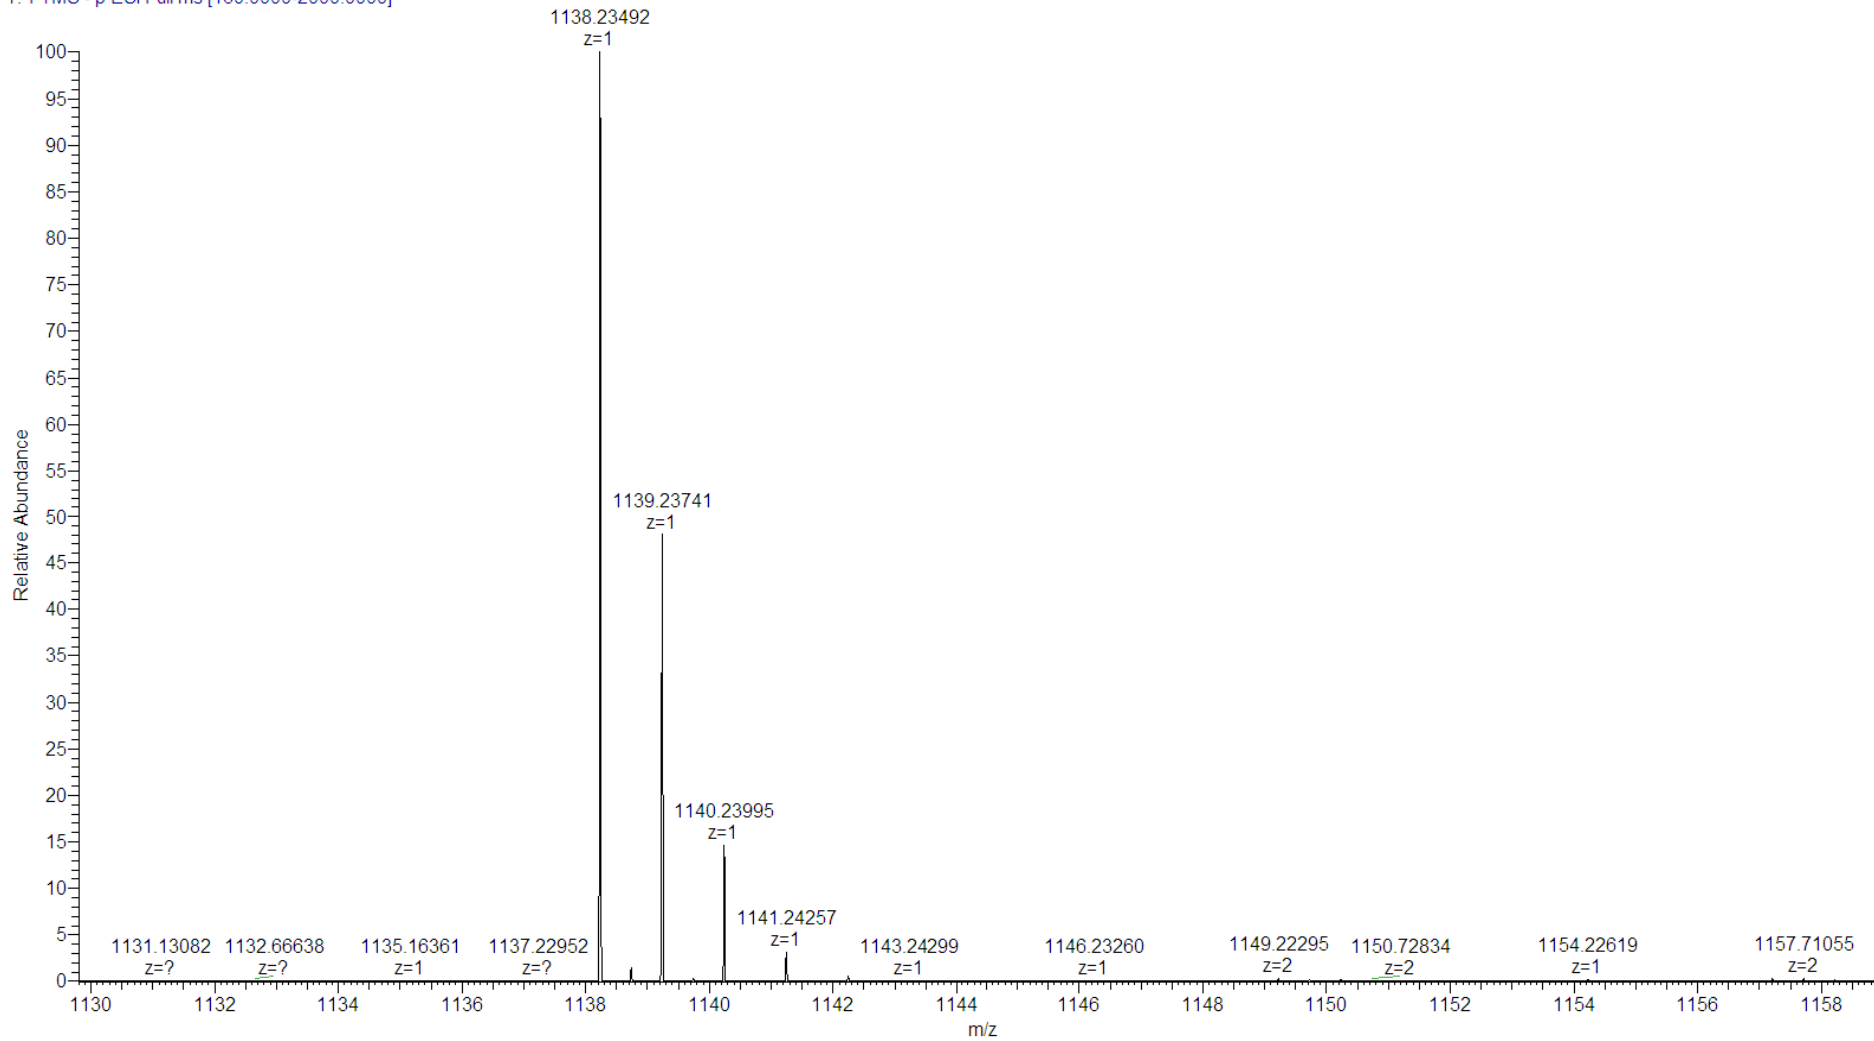



Compound 9a-2': TMG(-2'-O-C(O)-NH-CH<sub>2</sub>-CH<sub>2</sub>-triazole-CH<sub>2</sub>-DMHBI)pppG (NH<sub>4</sub><sup>+</sup> salt)

Chemical structure

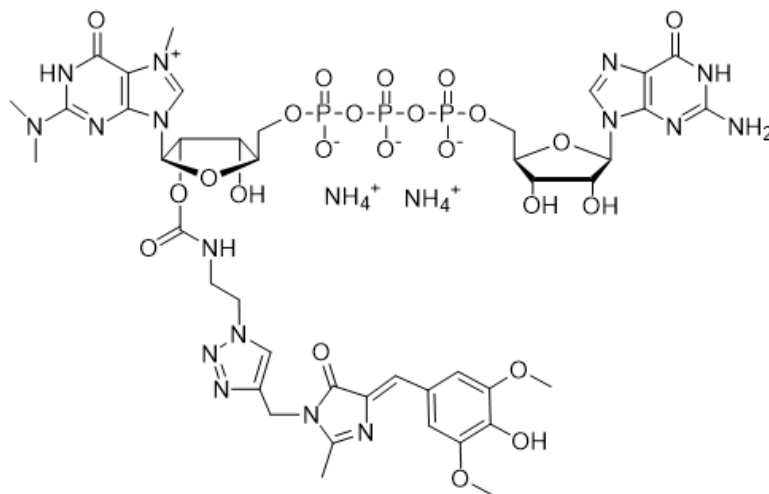

RP-HPLC (conditions c)

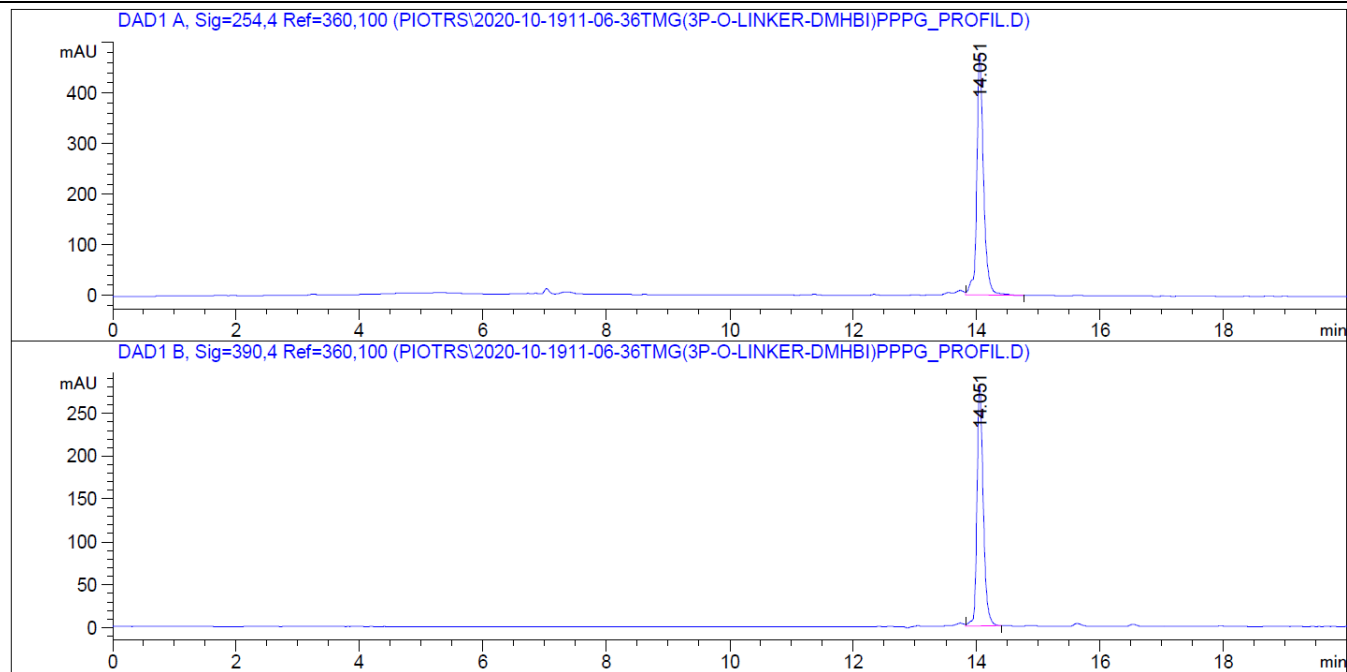

201119\_PSu\_01 #314-381 RT: 3.23-3.93 AV: 68 NL: 1.95E5  
T: FTMS - p ESI Full ms [150.0000-2000.0000]

MS (-) ESI (Calc. [M-H]<sup>-</sup> C<sub>42</sub>H<sub>52</sub>N<sub>16</sub>O<sub>23</sub>P<sub>3</sub> : 1241.26096, found: 1241.26303)

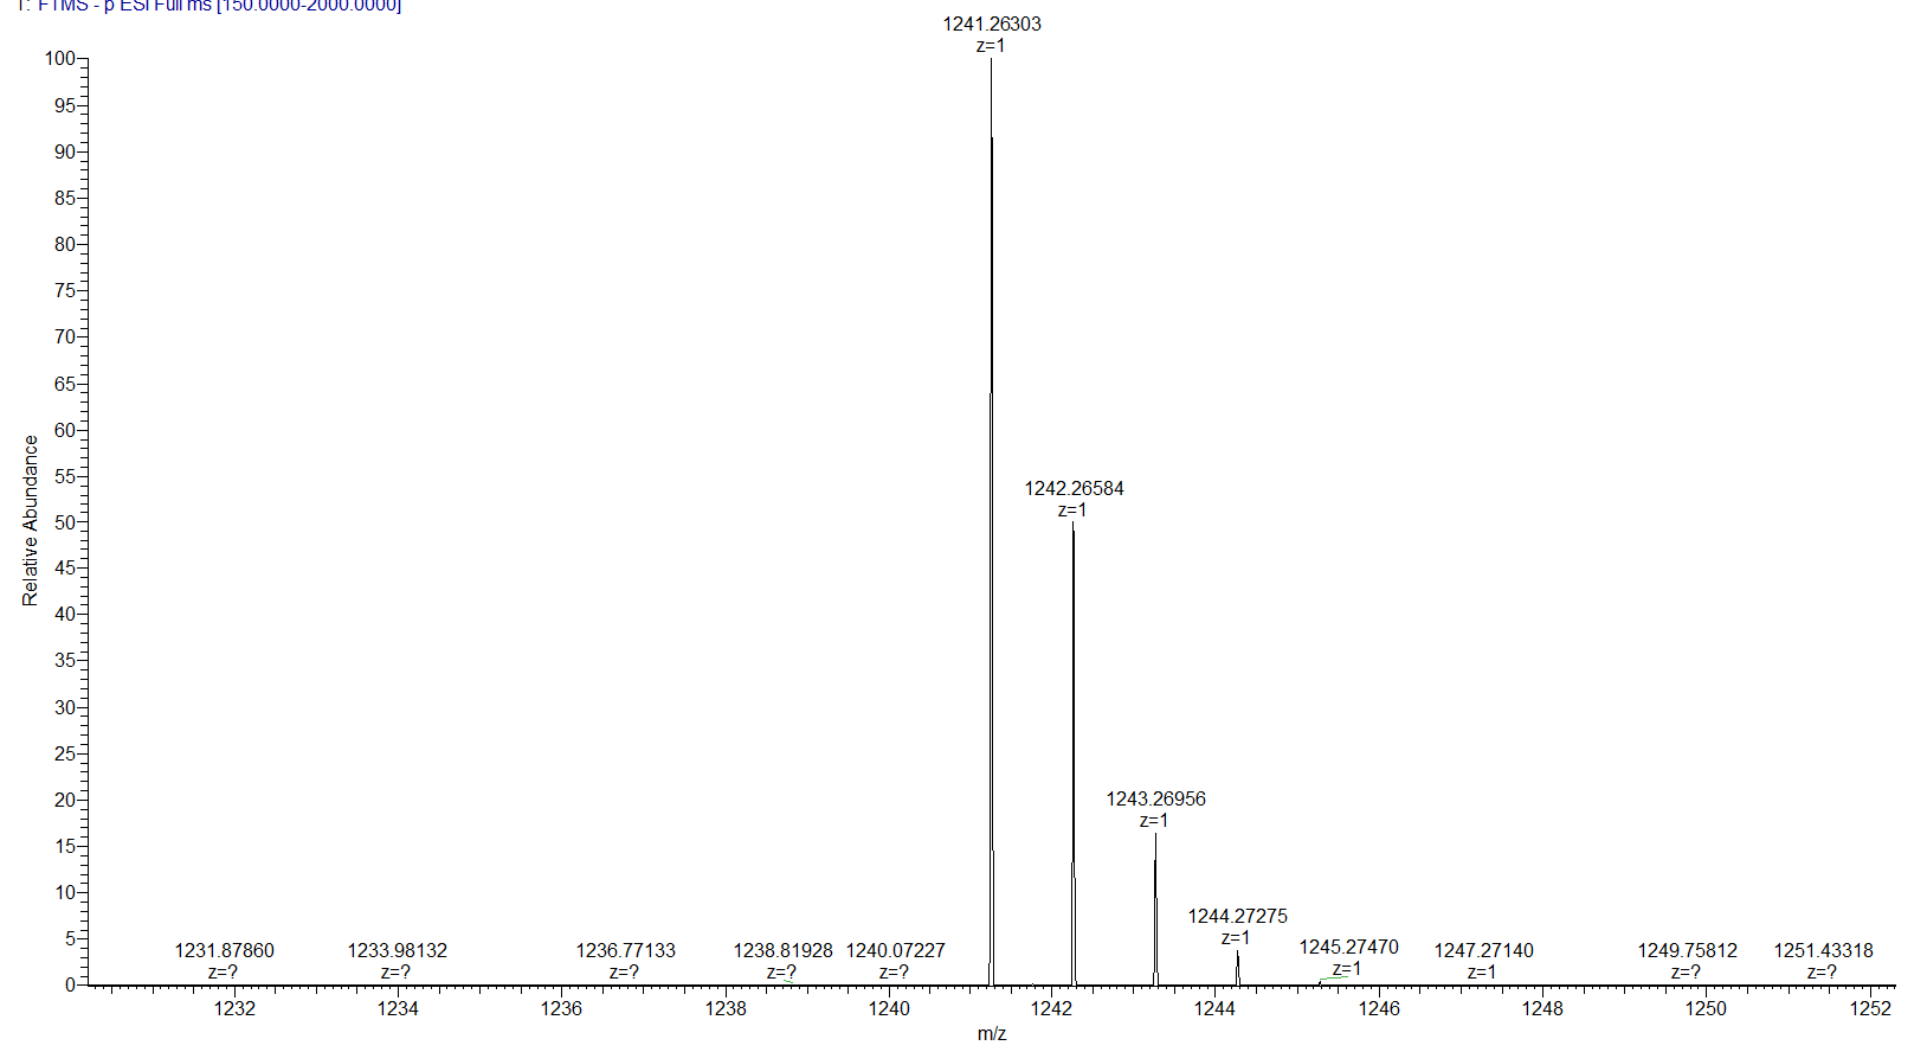

Compound 9a-3': TMG(-3'-O-C(O)-NH-CH<sub>2</sub>-CH<sub>2</sub>-triazole-CH<sub>2</sub>-DMHBI)pppG (NH<sub>4</sub><sup>+</sup> salt)

Chemical structure

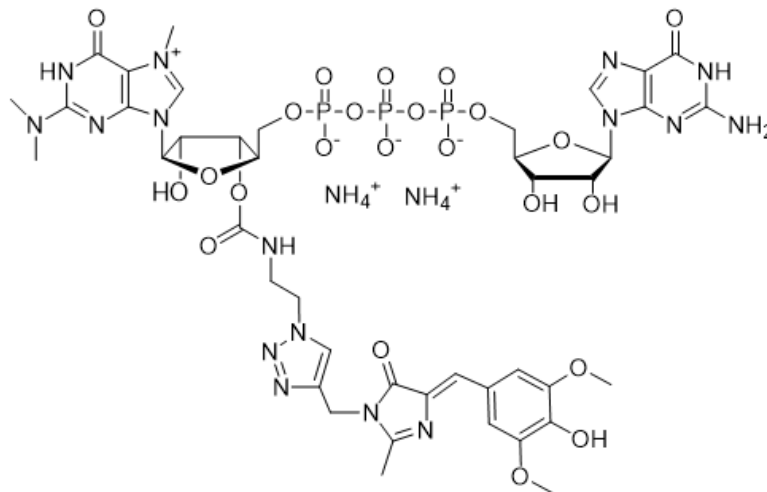

RP-HPLC (conditions c)

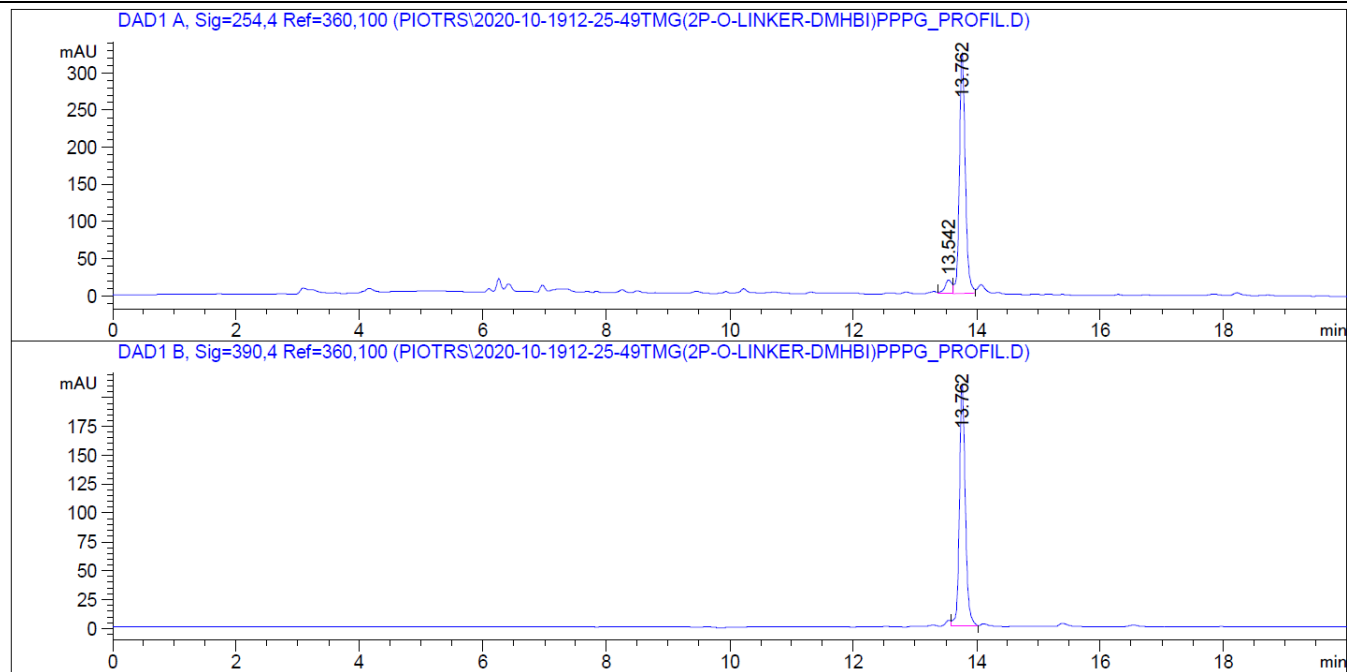

201119\_PSu\_02 #134-186 RT: 1.35-1.86 AV: 53 NL: 3.56E4  
T: FTMS - p ESI Full ms [150.0000-2000.0000]

MS (-) ESI (Calc. [M-H]<sup>-</sup> C<sub>42</sub>H<sub>52</sub>N<sub>16</sub>O<sub>23</sub>P<sub>3</sub> : 1241.26096, found: 1241.26341)

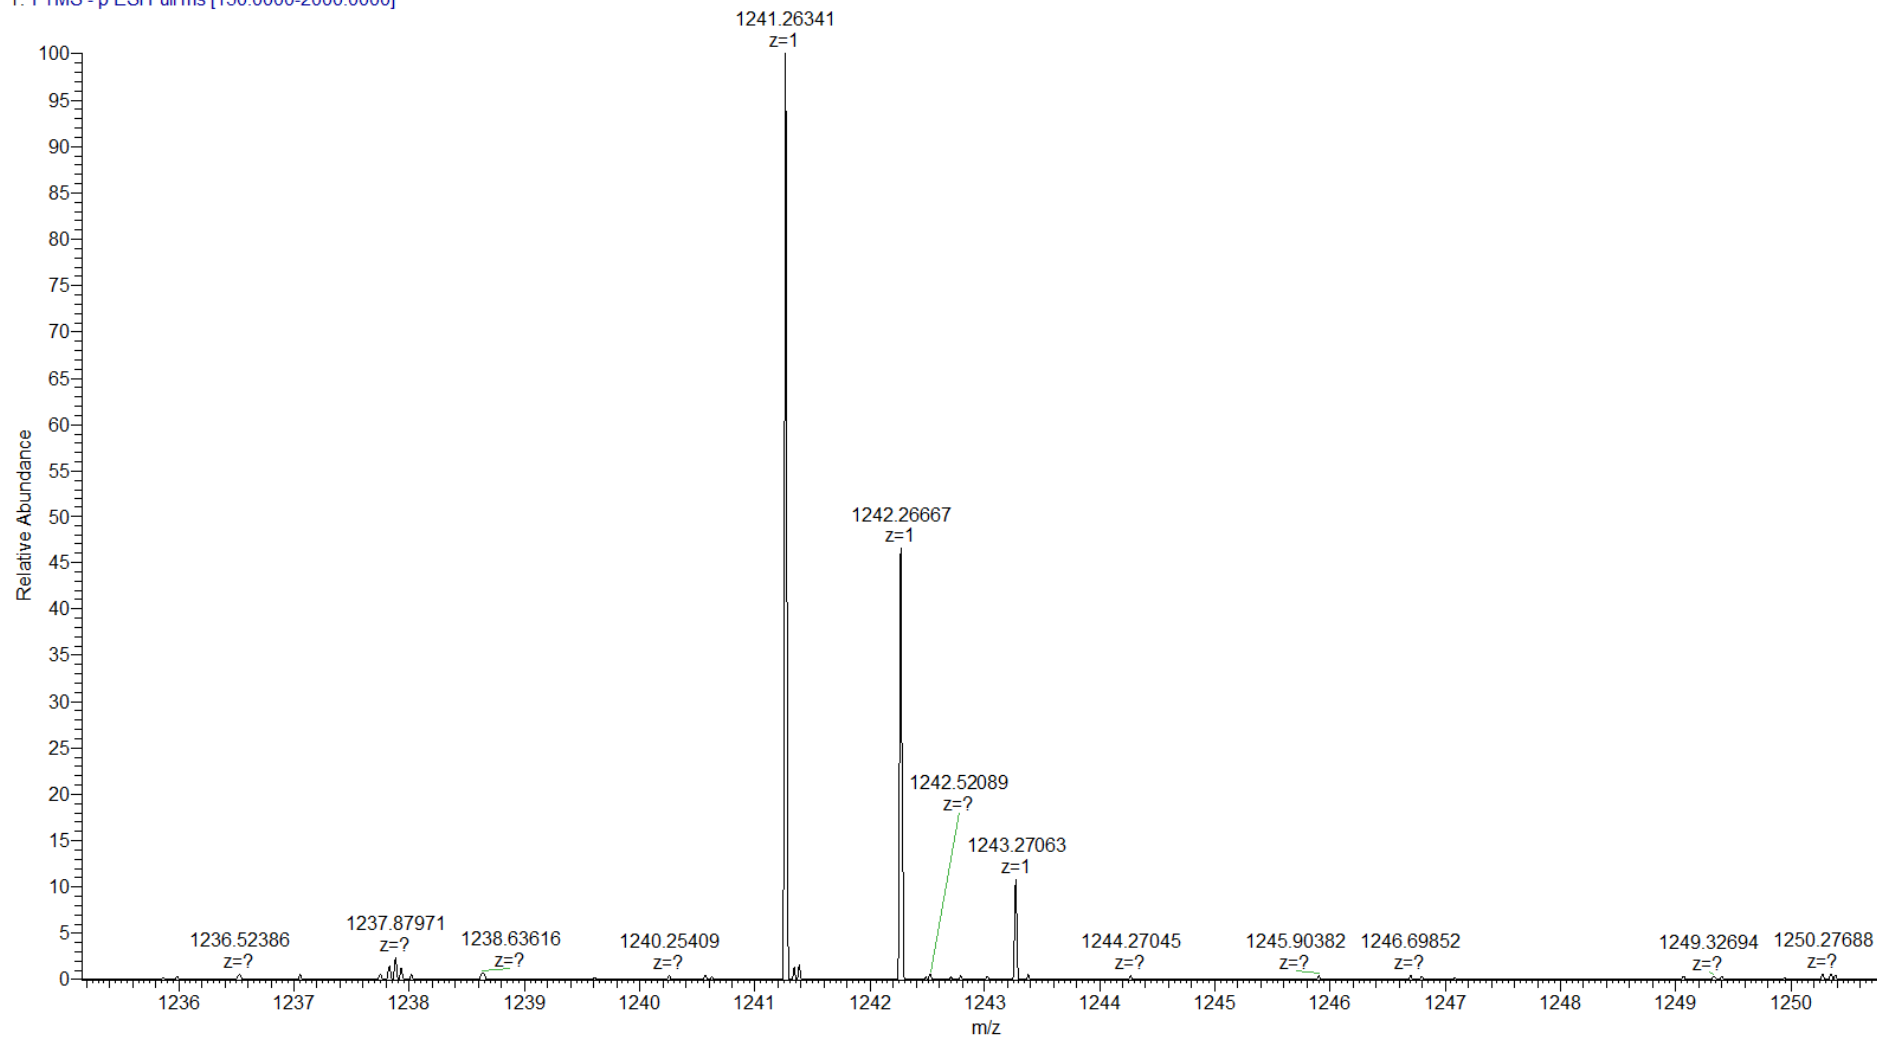

Compound 9b-2': TMG(-2'-O-C(O)-NH-CH<sub>2</sub>-CH<sub>2</sub>-triazole-CH<sub>2</sub>-oHBI)pppG (NH<sub>4</sub><sup>+</sup> salt)

Chemical structure

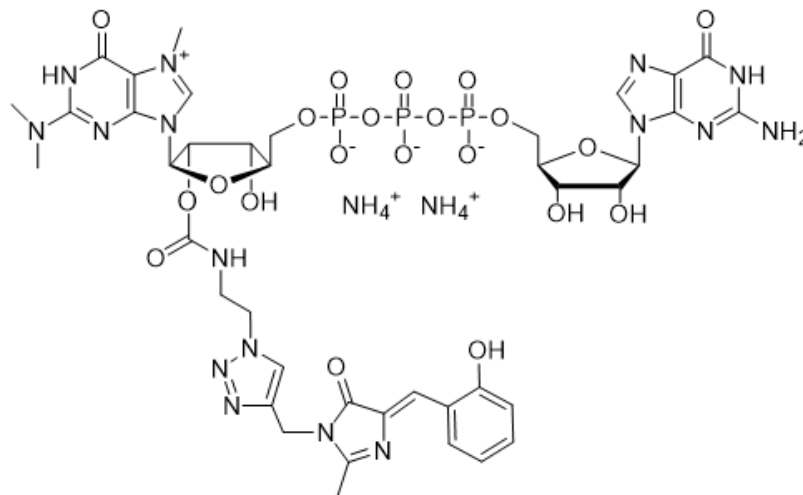

RP-HPLC (conditions c)

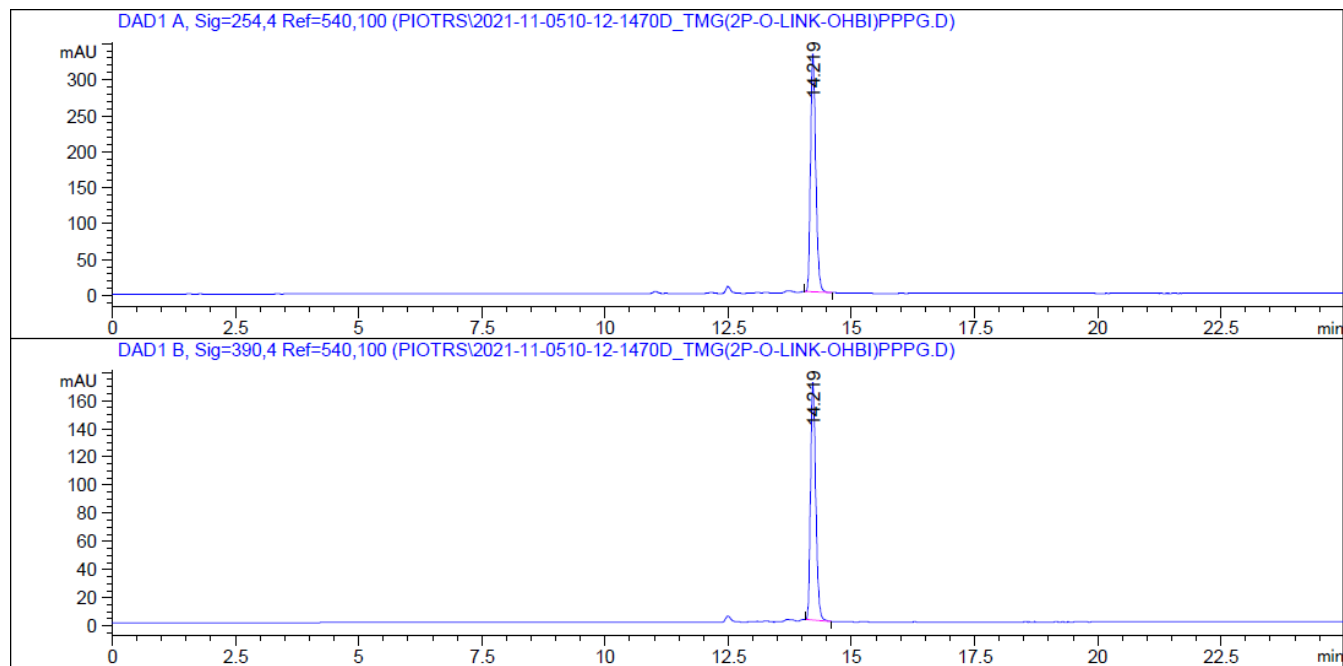

201119\_PSu\_03 #39-107 RT: 0.40-1.08 AV: 69 NL: 1.37E6  
T: FTMS - p ESI Full ms [150.0000-2000.0000]

MS (-) ESI (Calc. [M-H]<sup>-</sup> C<sub>40</sub>H<sub>48</sub>N<sub>16</sub>O<sub>21</sub>P<sub>3</sub> : 1181.23983, found: 1181.24295)

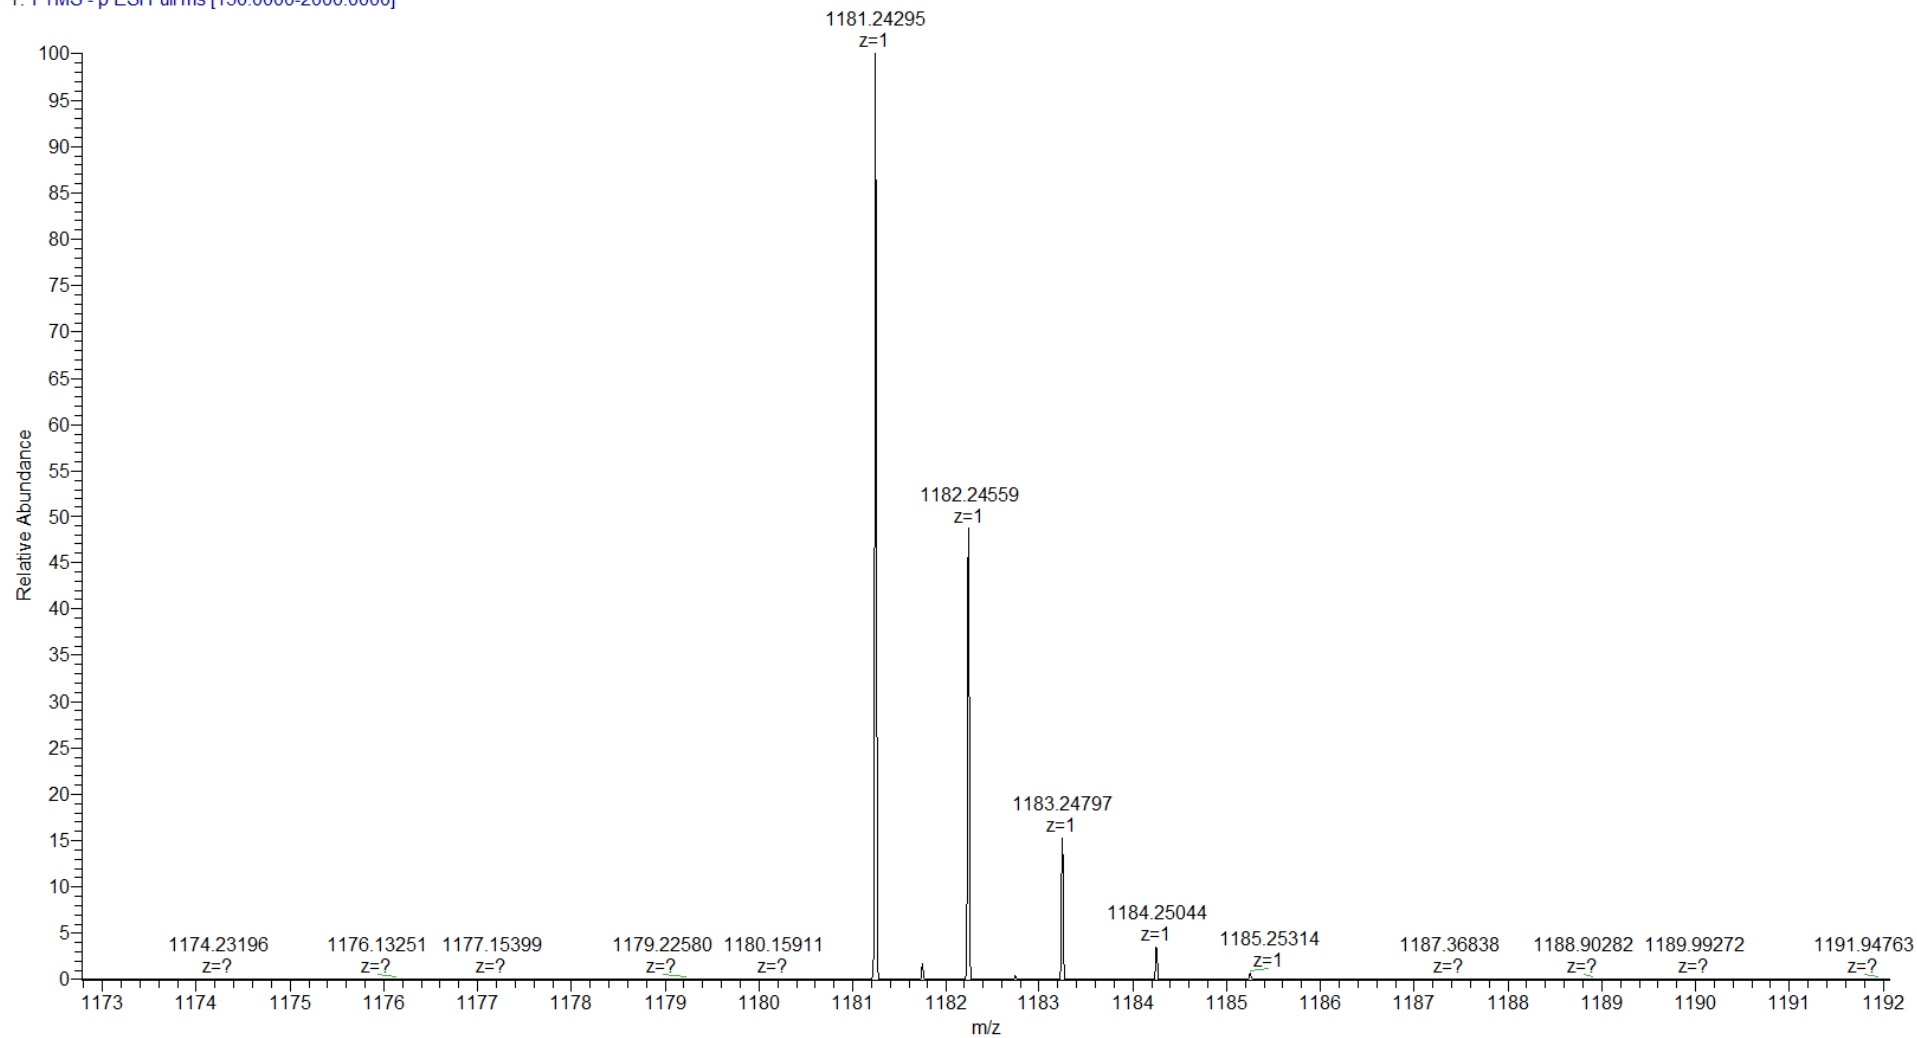

Compound 9b-3': TMG(-3'-O-C(O)-NH-CH<sub>2</sub>-CH<sub>2</sub>-triazole-CH<sub>2</sub>-oHBI)pppG (NH<sub>4</sub><sup>+</sup> salt)

Chemical structure

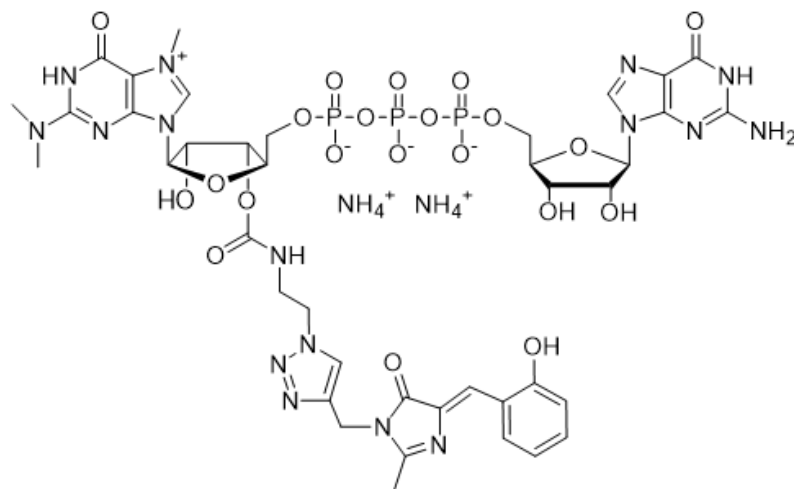

RP-HPLC (conditions c)

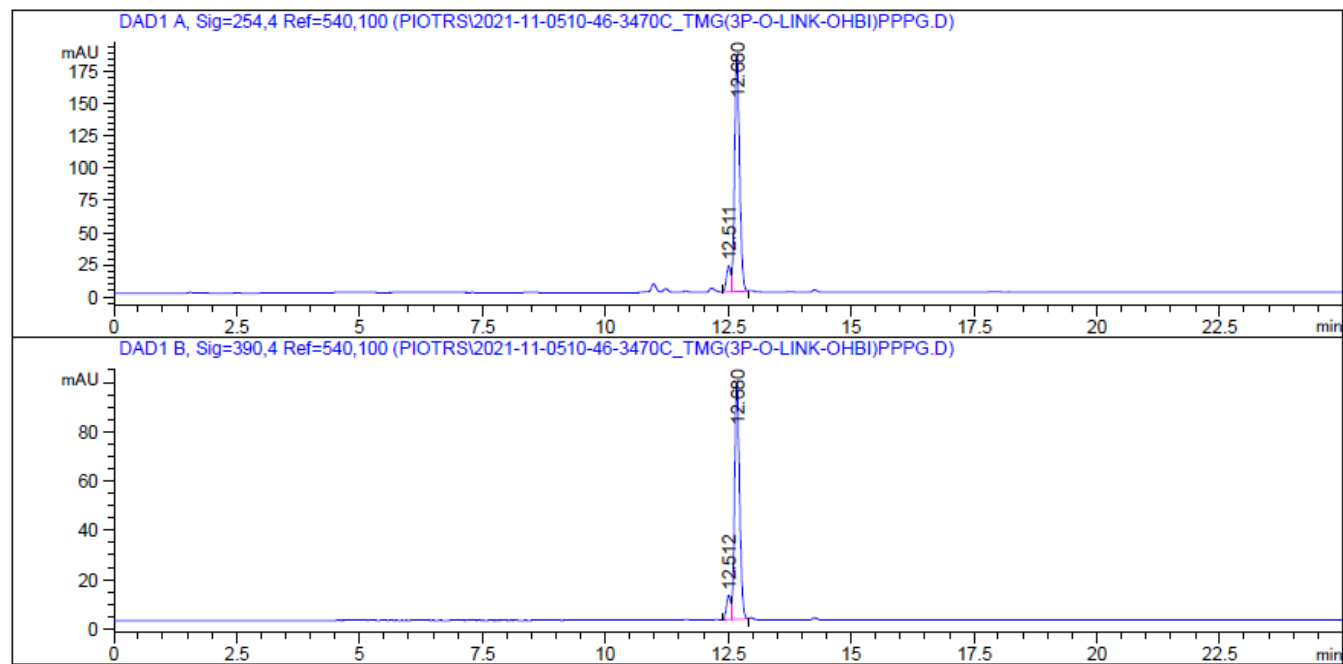

MS (-) ESI (Calc. [M-H]<sup>-</sup> C<sub>40</sub>H<sub>48</sub>N<sub>16</sub>O<sub>21</sub>P<sub>3</sub> : 1181.23983, found: 1181.24225)

201119\_PSu\_04 #27-85 RT: 0.28-0.86 AV: 59 NL: 1.91E6  
T: FTMS - p ESI Full ms [150.0000-2000.0000]

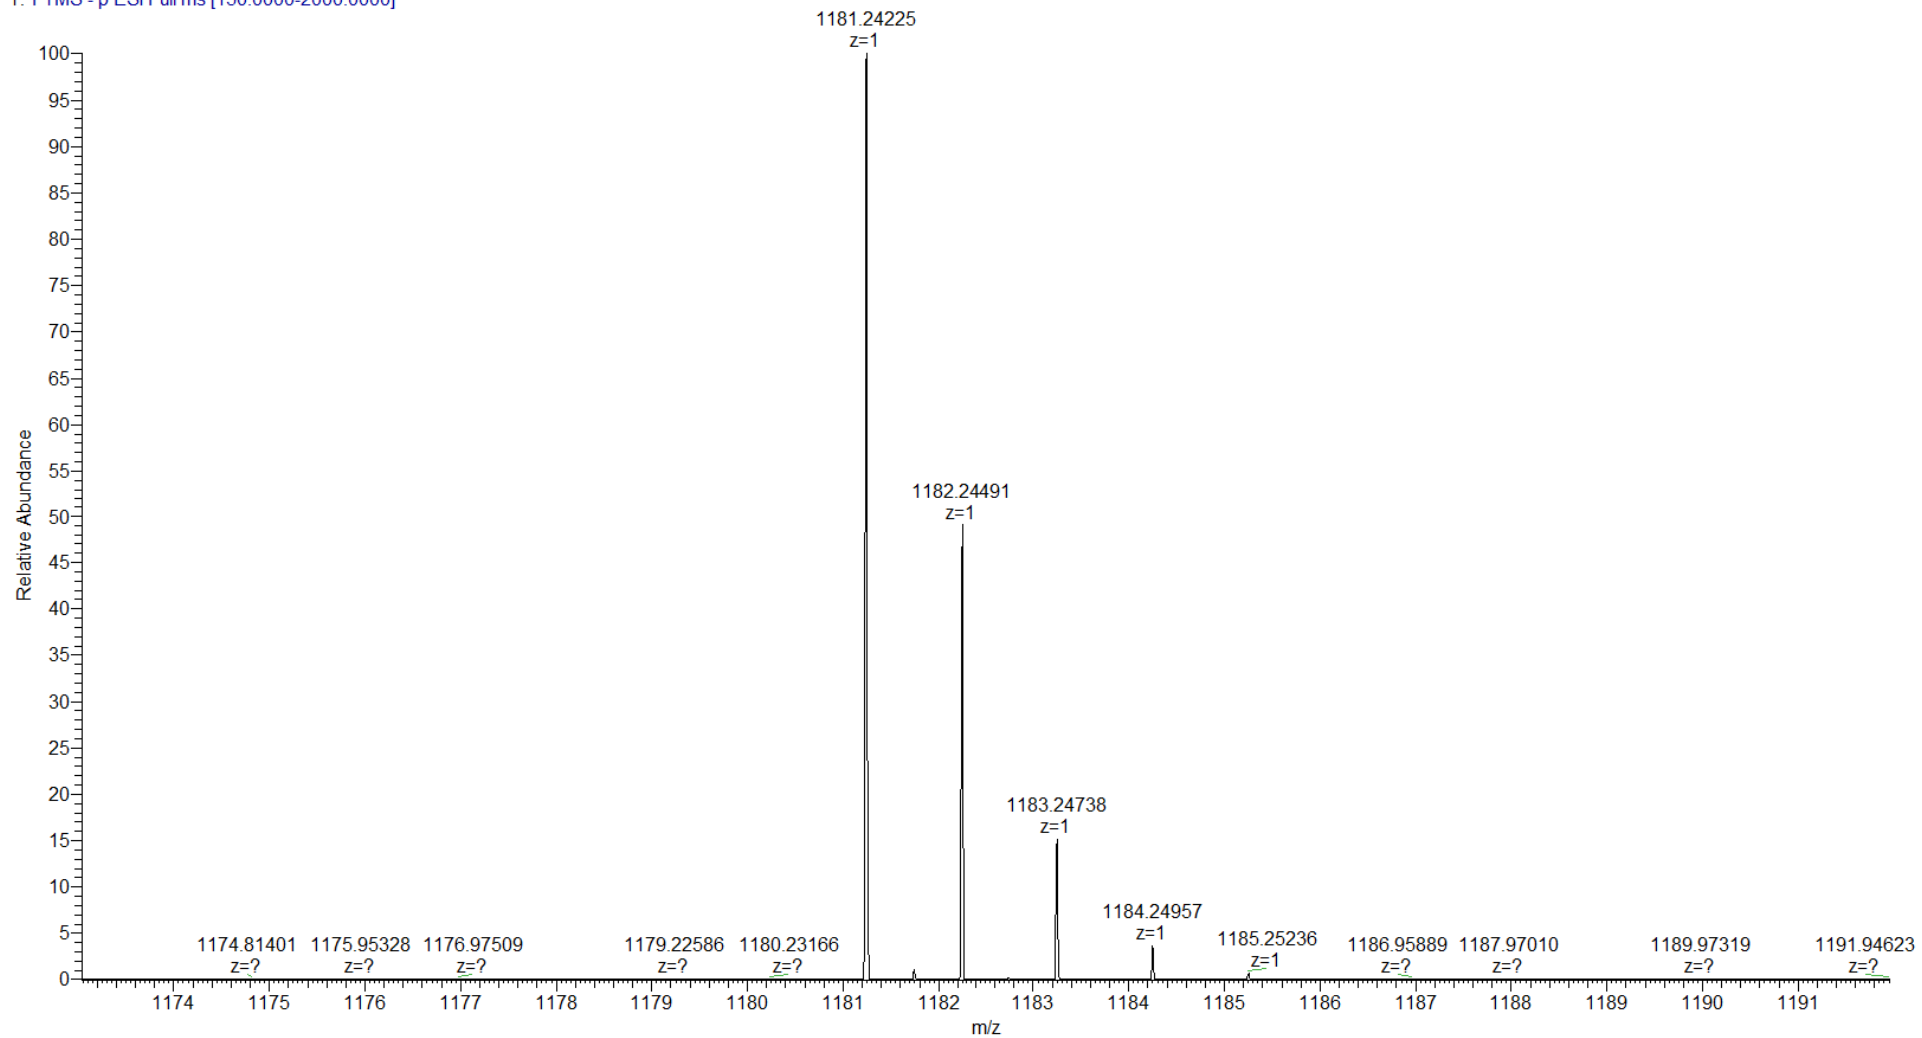



Compound 10a-2': GMP-2'-O-C(O)-NH-CH<sub>2</sub>-CH<sub>2</sub>-triazole-CH<sub>2</sub>-DMHBI (NH<sub>4</sub><sup>+</sup> salt)

Chemical structure

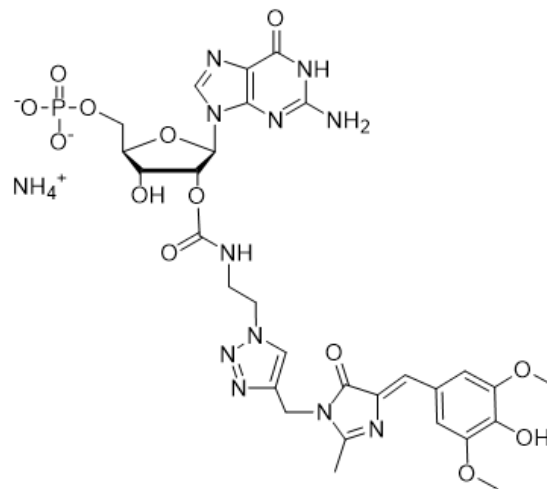

RP-HPLC (conditions c)

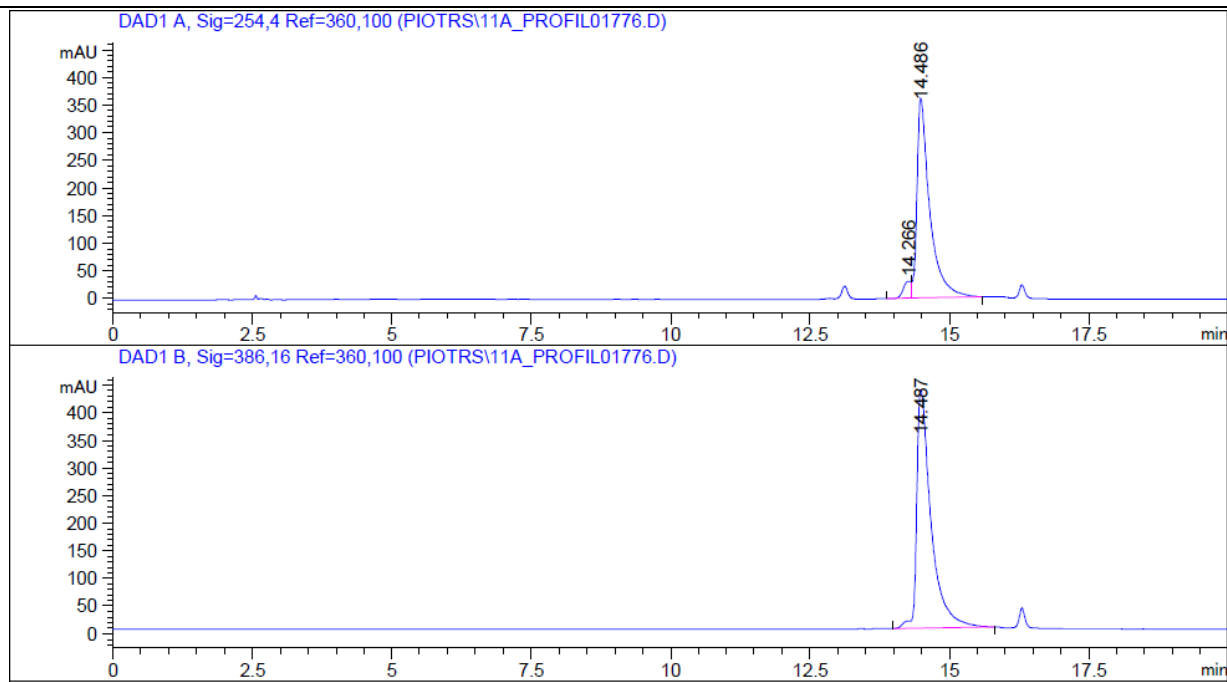

MS (-) ESI (Calc. [M-H]<sup>-</sup> C<sub>29</sub>H<sub>33</sub>N<sub>11</sub>O<sub>13</sub>P<sup>-</sup> : 774.2002, found: 774.20169)

200213\_Psu\_42 #41-105 RT: 0.43-1.07 AV: 65 NL: 4.42E5  
T: FTMS - p ESI Full ms [150.0000-2000.0000]

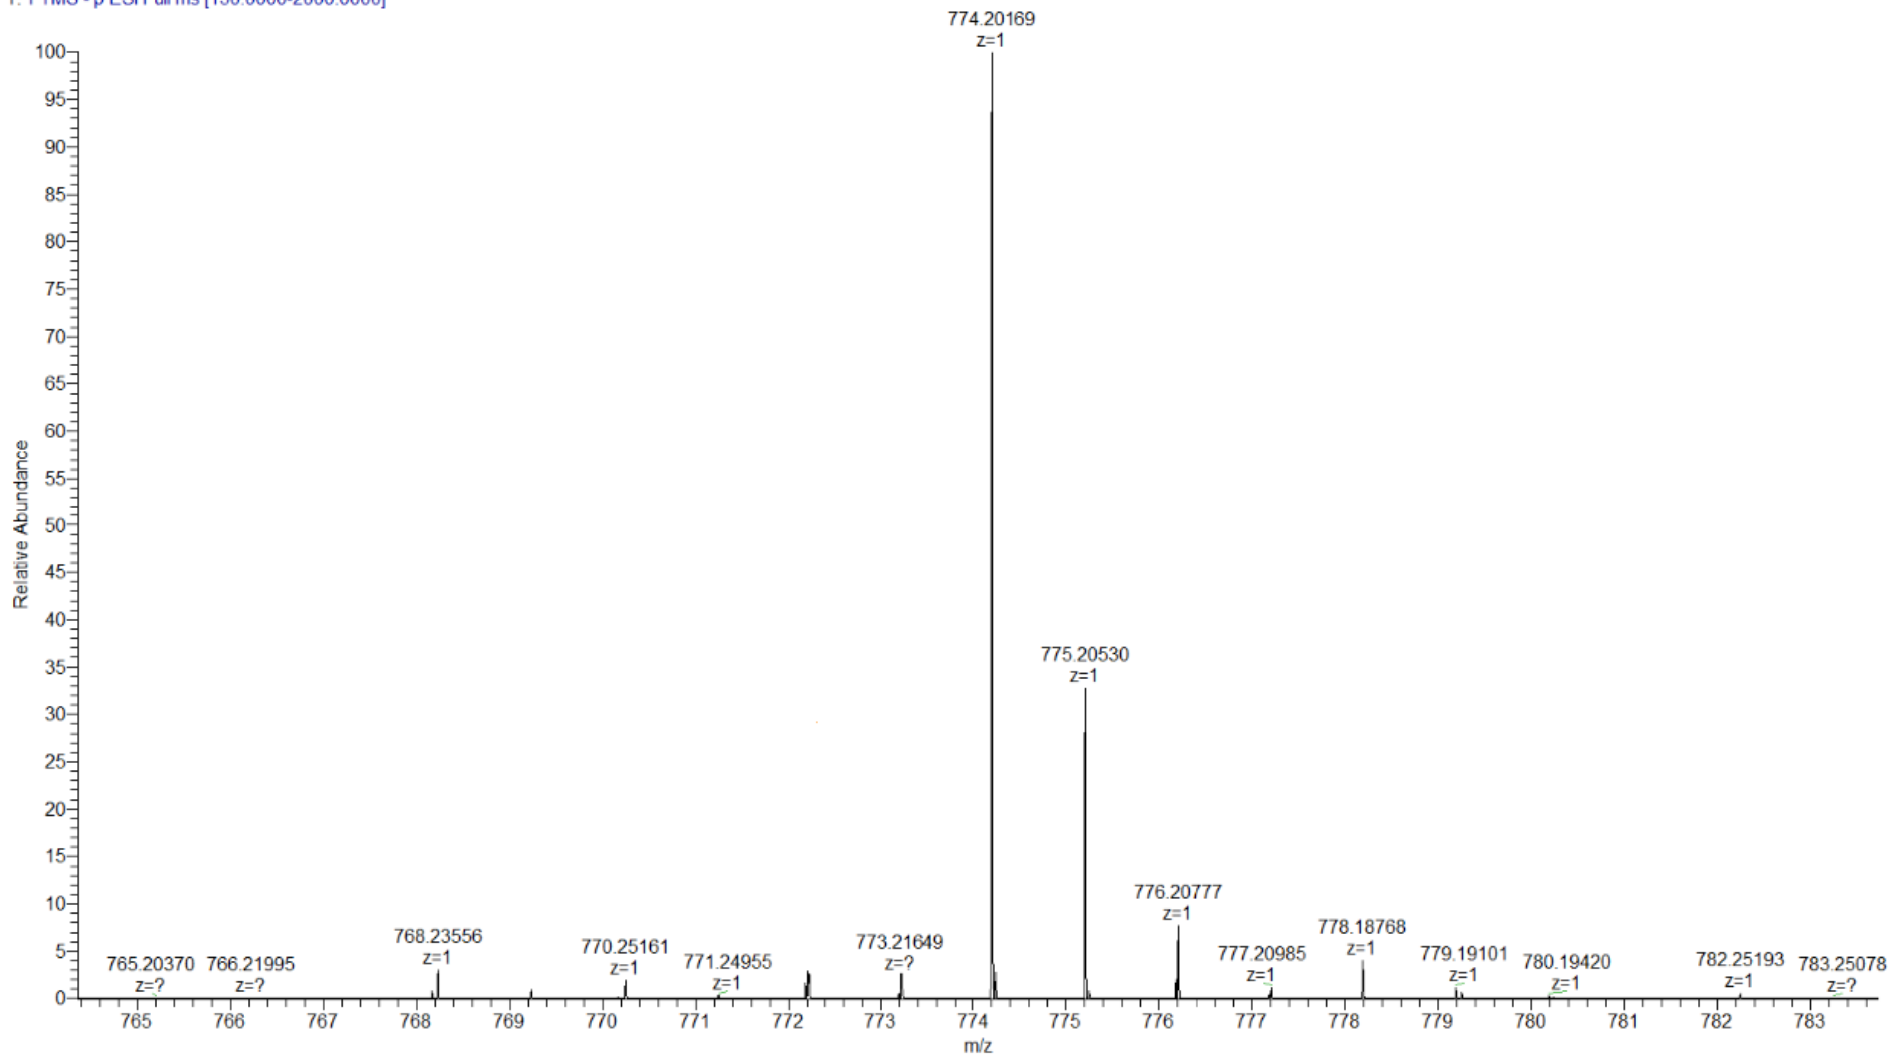

Compound 10a-3': GMP-3'-O-C(O)-NH-CH<sub>2</sub>-CH<sub>2</sub>-triazole-CH<sub>2</sub>-DMHBI (NH<sub>4</sub><sup>+</sup> salt)

Chemical structure

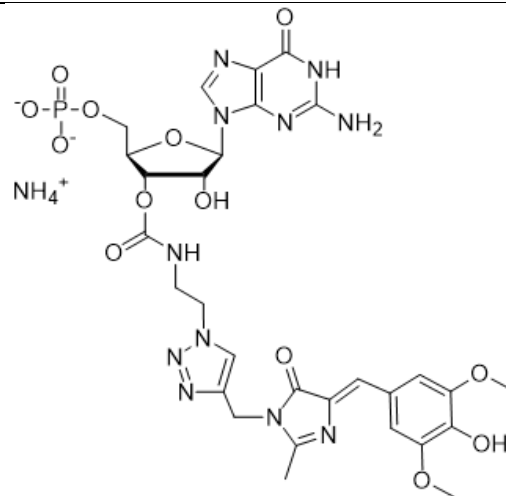

RP-HPLC (conditions c)

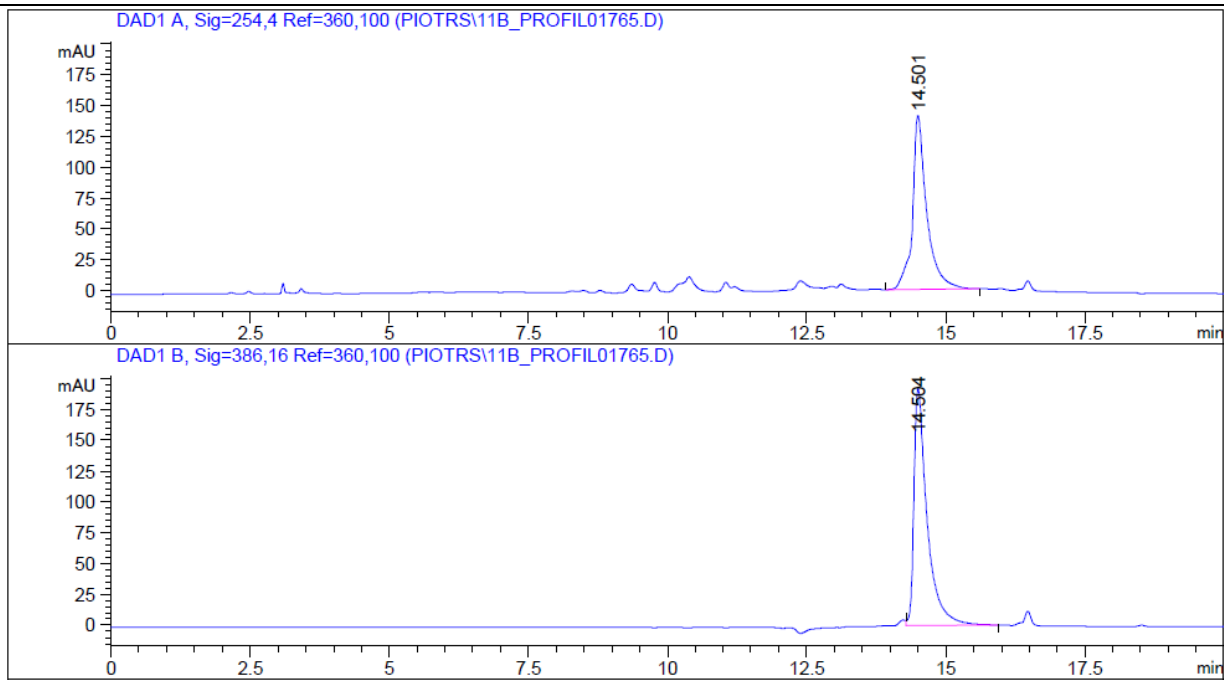

MS (-) ESI (Calc. [M-H]<sup>-</sup> C<sub>29</sub>H<sub>33</sub>N<sub>11</sub>O<sub>13</sub>P<sup>-</sup> : 774.20024, found: 774.20160)

200213\_Psu\_43#32.139 RT: 0.33-1.38 AV: 108 NL: 6.75E6  
T: FTMS - p ESI Full ms [150.0000-2000.0000]

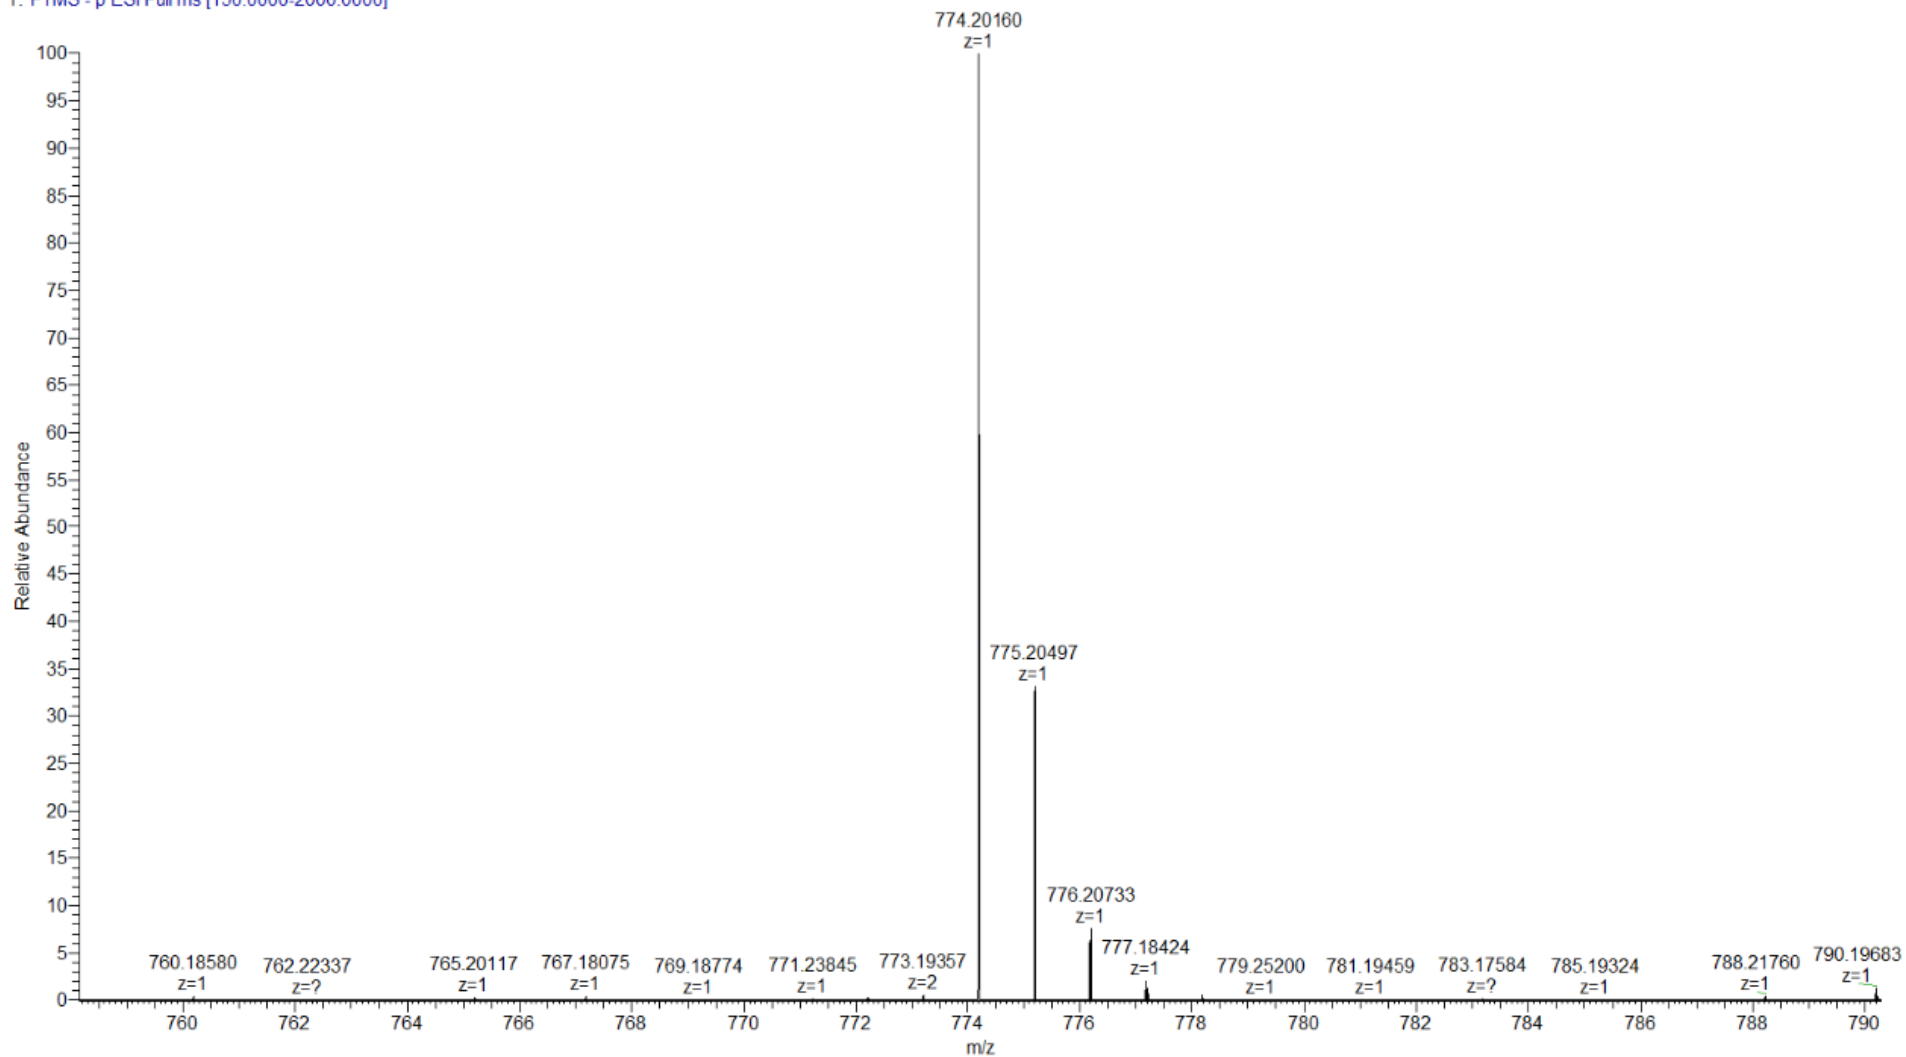

Compound 10b-2': GMP-2'-O-C(O)-NH-CH<sub>2</sub>-CH<sub>2</sub>-triazole-CH<sub>2</sub>-oHBI (NH<sub>4</sub><sup>+</sup> salt)

Chemical structure

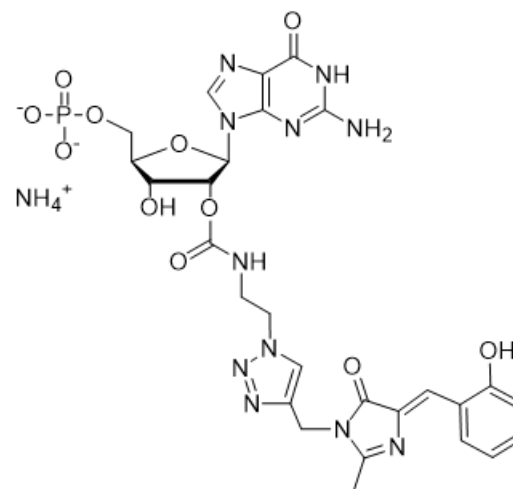

RP-HPLC (conditions c)

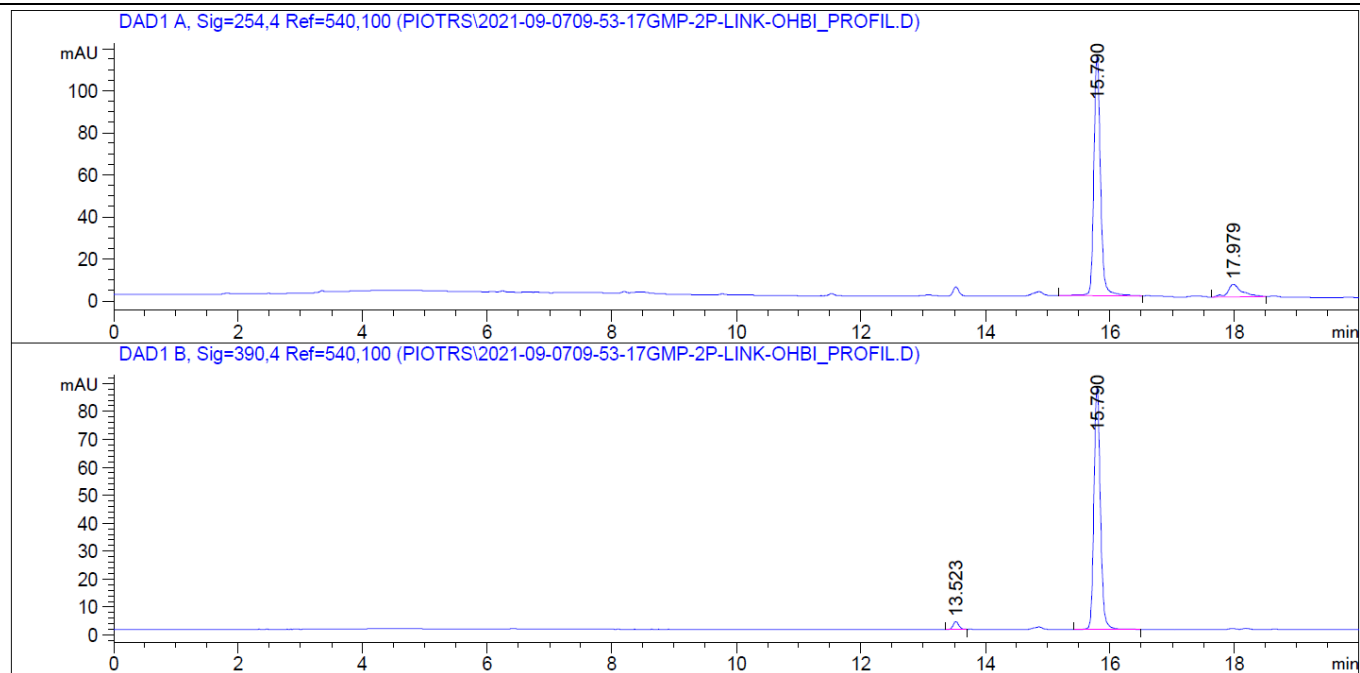

MS (-) ESI (Calc. [M-H]<sup>-</sup>C<sub>27</sub>H<sub>29</sub>N<sub>11</sub>O<sub>11</sub>P<sup>-</sup> : 714.1791, found: 714.17955)

210504\_PSu\_16\_c #60-155 RT: 0.57-1.48 AV: 96 NL: 2.89E7  
T: FTMS - p ESI Full ms [150.0000-2000.0000]

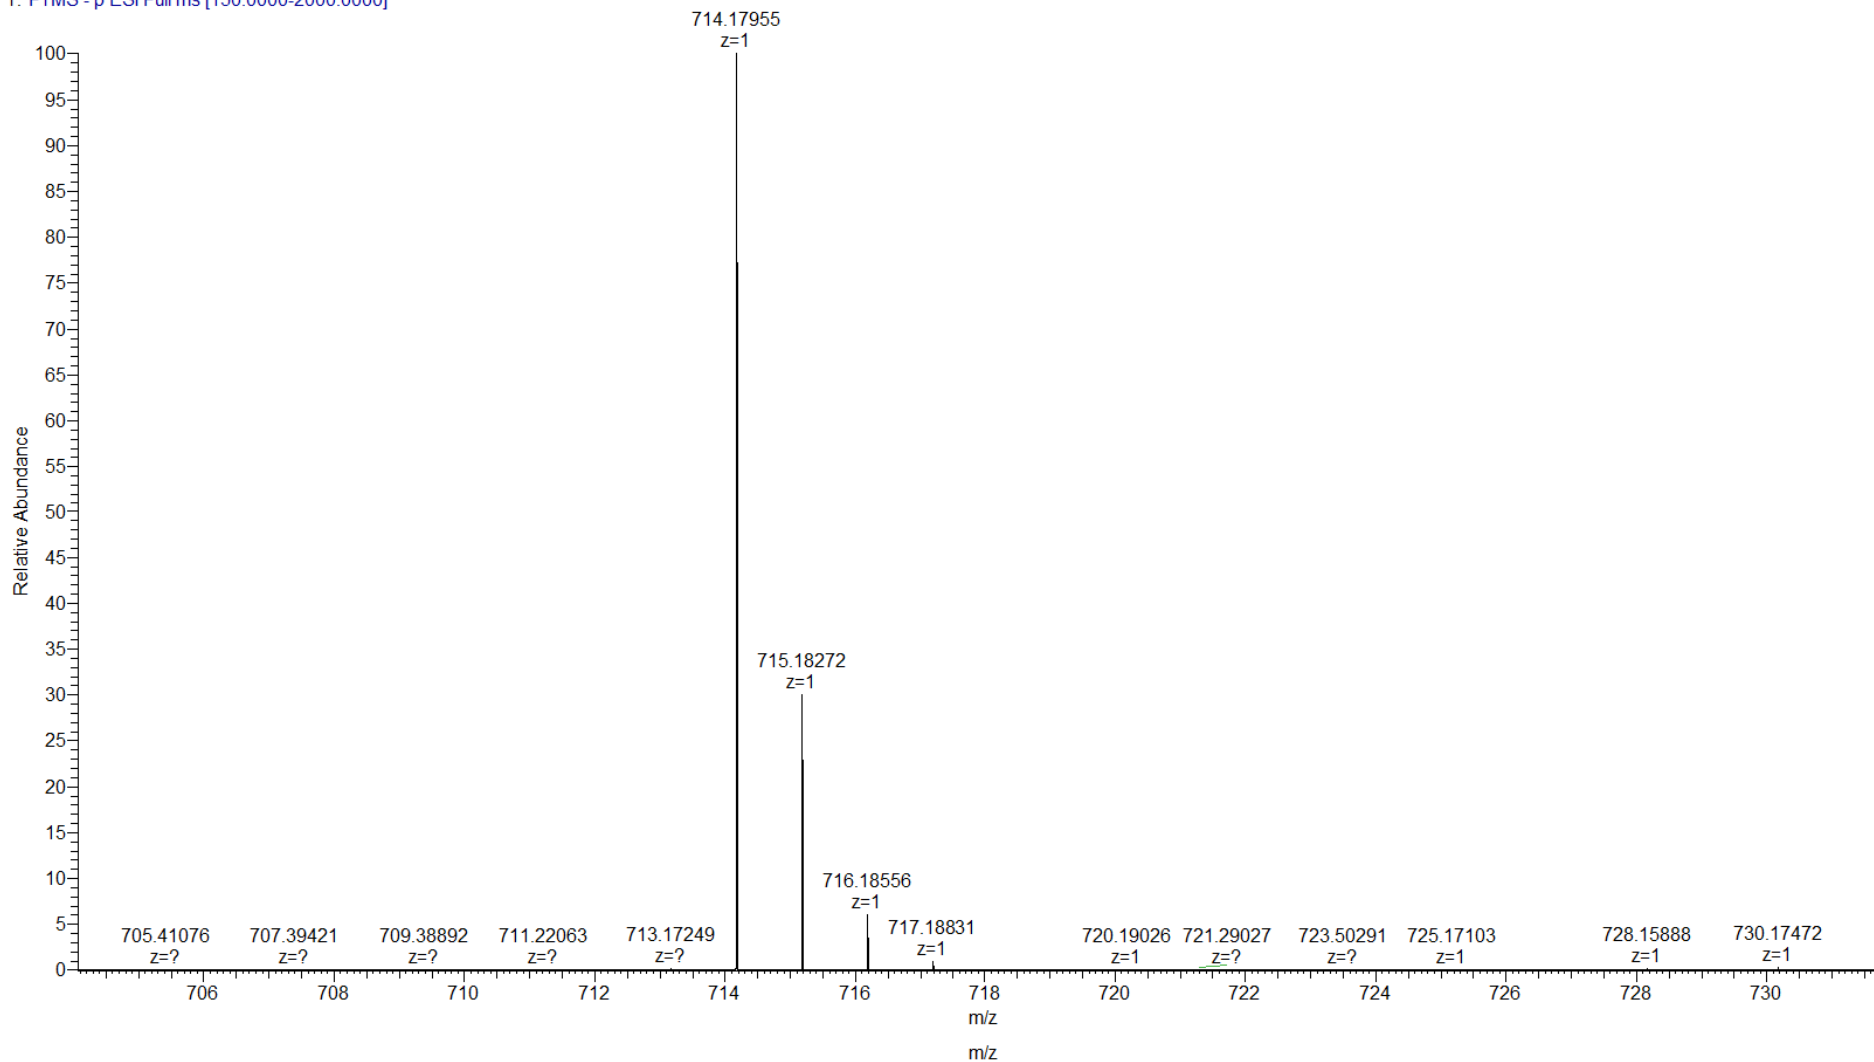

Compound 10b-3': GMP-3'-O-C(O)-NH-CH<sub>2</sub>-CH<sub>2</sub>-triazole-CH<sub>2</sub>-oHBI (NH<sub>4</sub><sup>+</sup> salt)

Chemical structure

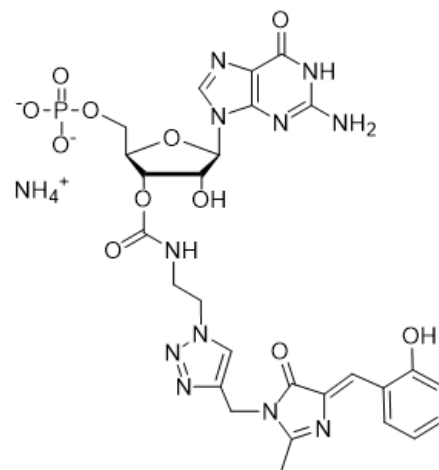

RP-HPLC (conditions c)

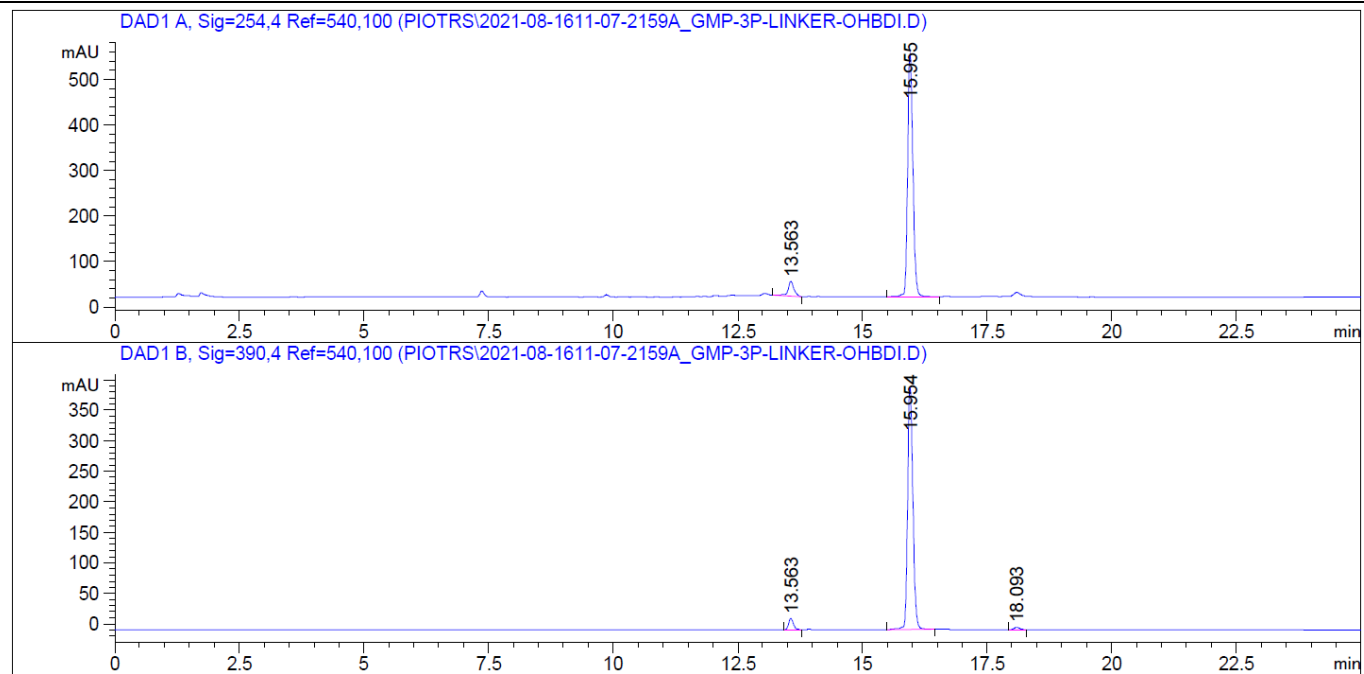

220214\_PSu\_59a #88-180 RT: 0.77-1.57 AV: 93 NL: 1.41E7  
T: FTMS - p ESI Full ms [160.0000-2000.0000]

MS (-) ESI (Calc. [M-H]<sup>-</sup> C<sub>27</sub>H<sub>29</sub>N<sub>11</sub>O<sub>11</sub>P<sup>-</sup> : 714.1791, found: 714.17992)

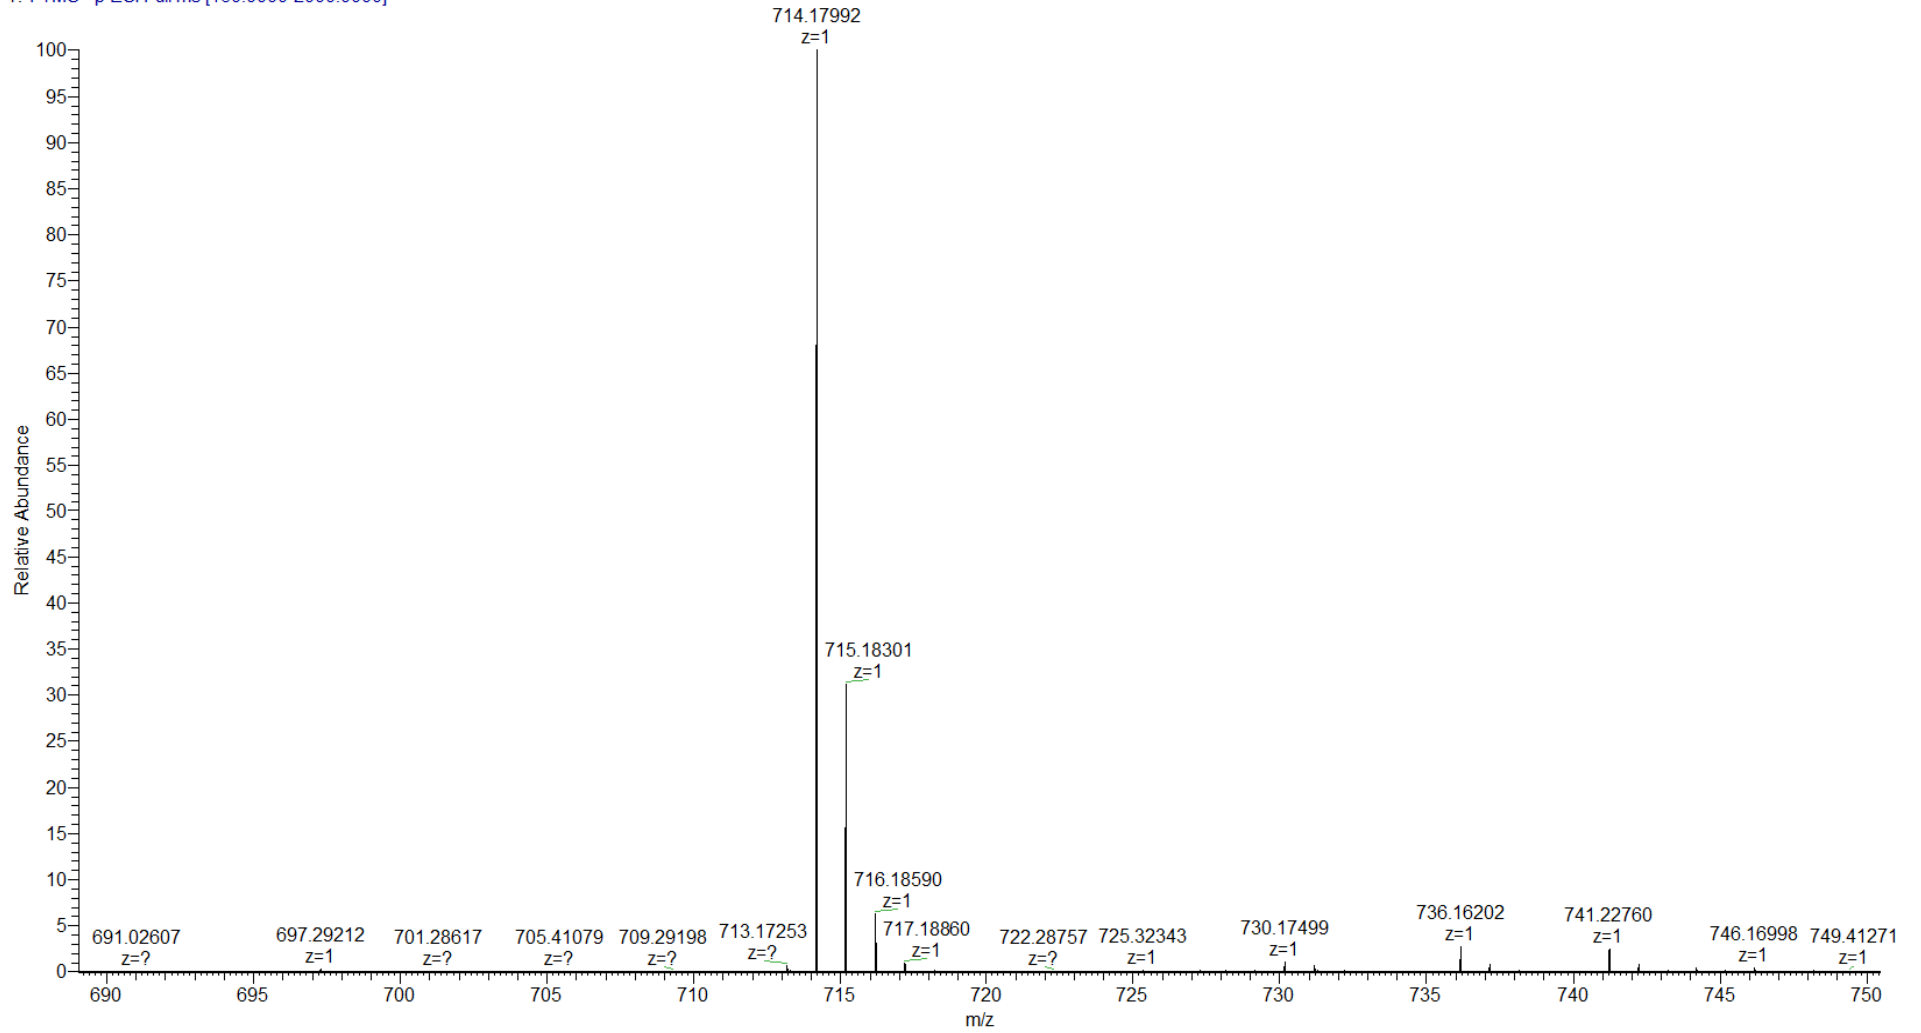



Compound 10c-2': GMP-2'-O-C(O)-NH-CH<sub>2</sub>-CH<sub>2</sub>-triazole-CH<sub>2</sub>-HEMABI (NH<sub>4</sub><sup>+</sup> salt)

Chemical structure

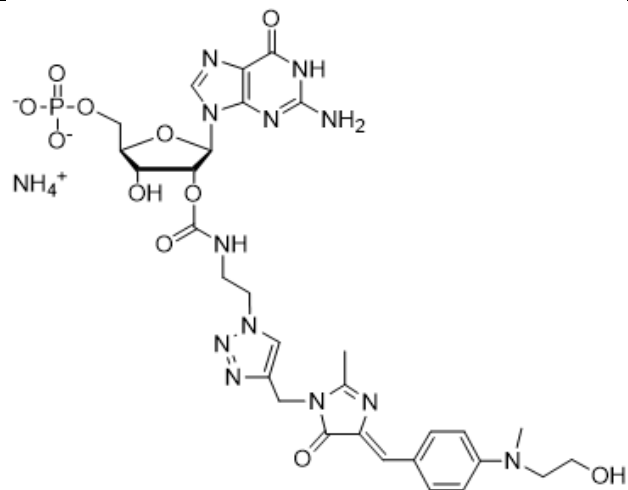

RP-HPLC (conditions c)

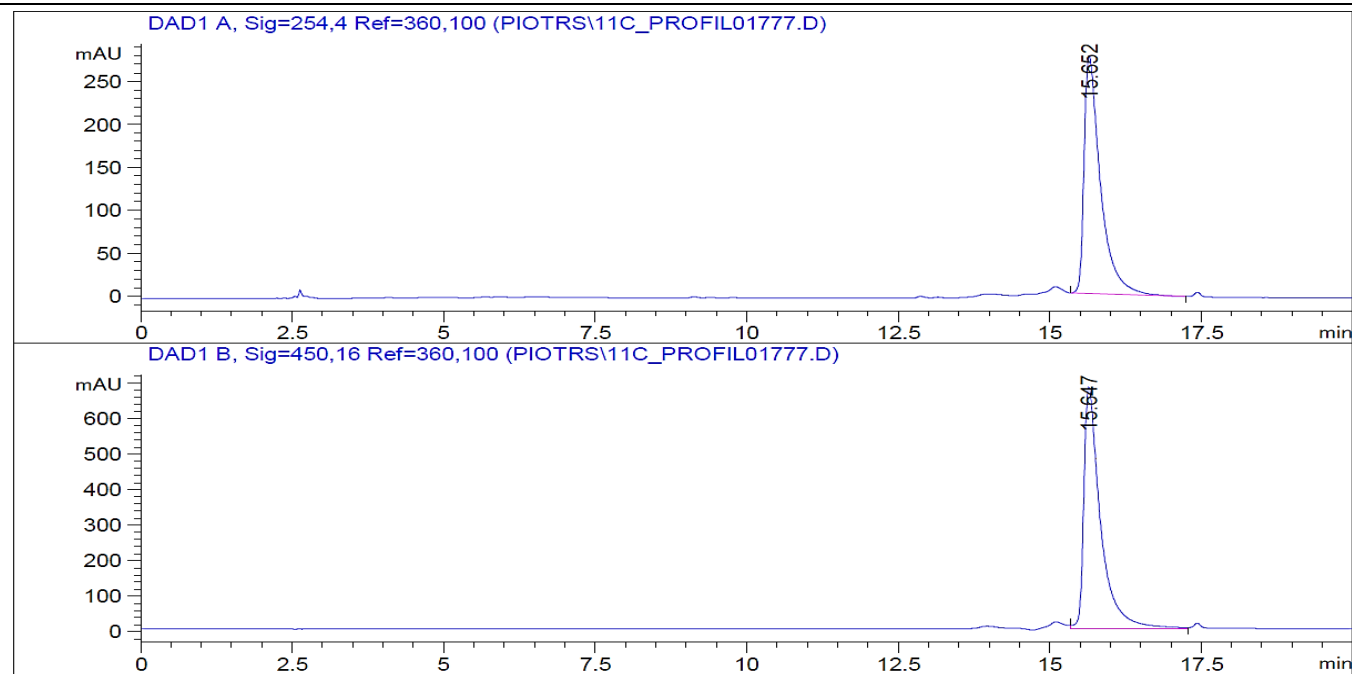

MS (-) ESI (Calc. [M-H]<sup>-</sup> C<sub>30</sub>H<sub>36</sub>N<sub>12</sub>O<sub>11</sub>P<sup>-</sup> : 771.2370, found: 771.23793)

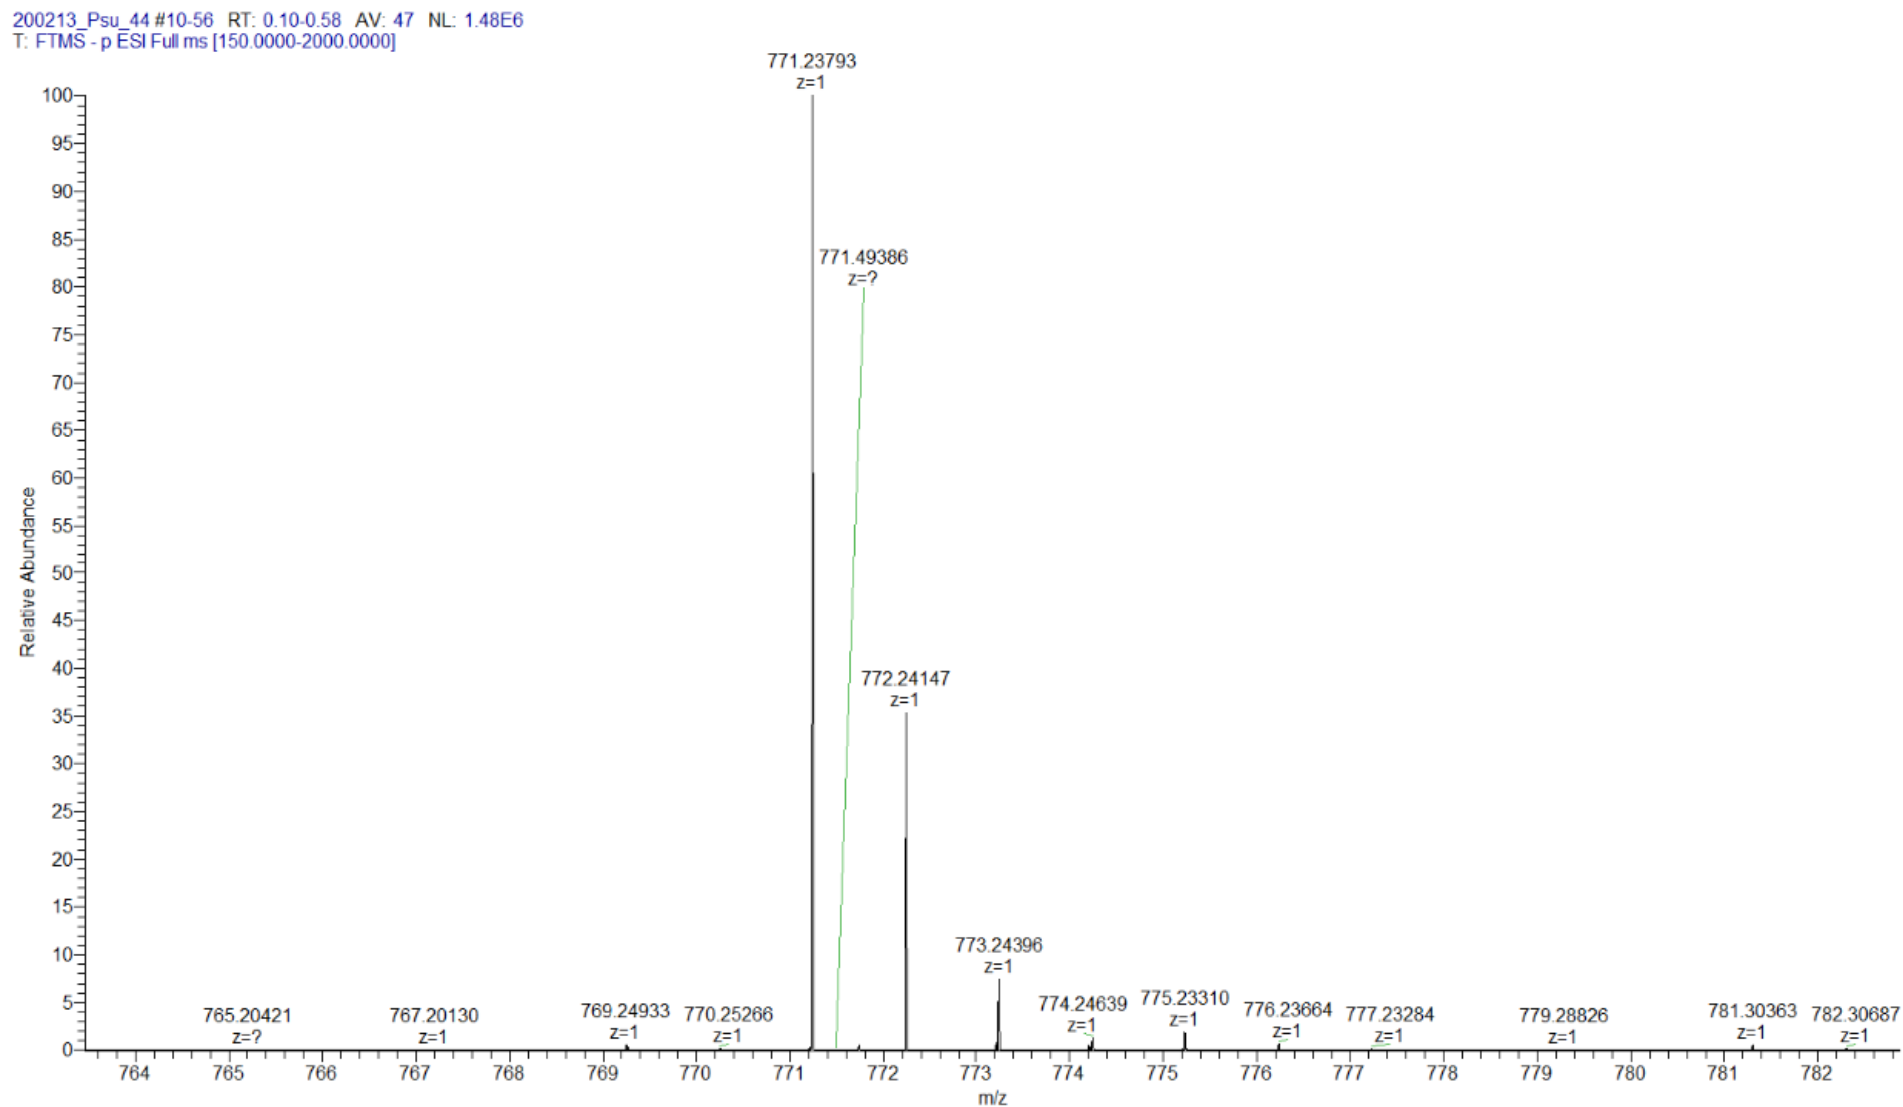

Compound 10c-3': GMP-3'-O-C(O)-NH-CH<sub>2</sub>-CH<sub>2</sub>-triazole-CH<sub>2</sub>-HEMABI (NH<sub>4</sub><sup>+</sup> salt)

Chemical structure

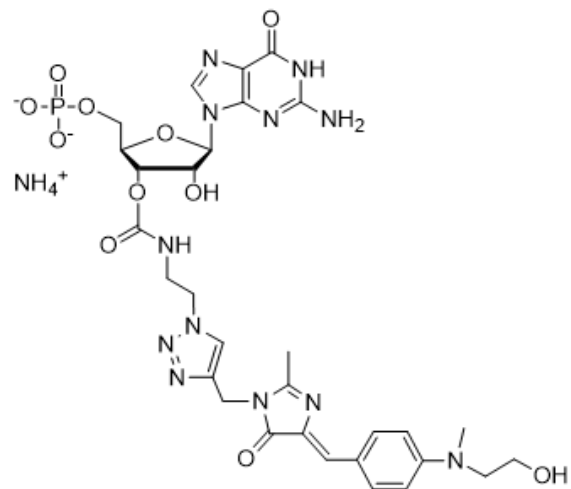

RP-HPLC (conditions c)

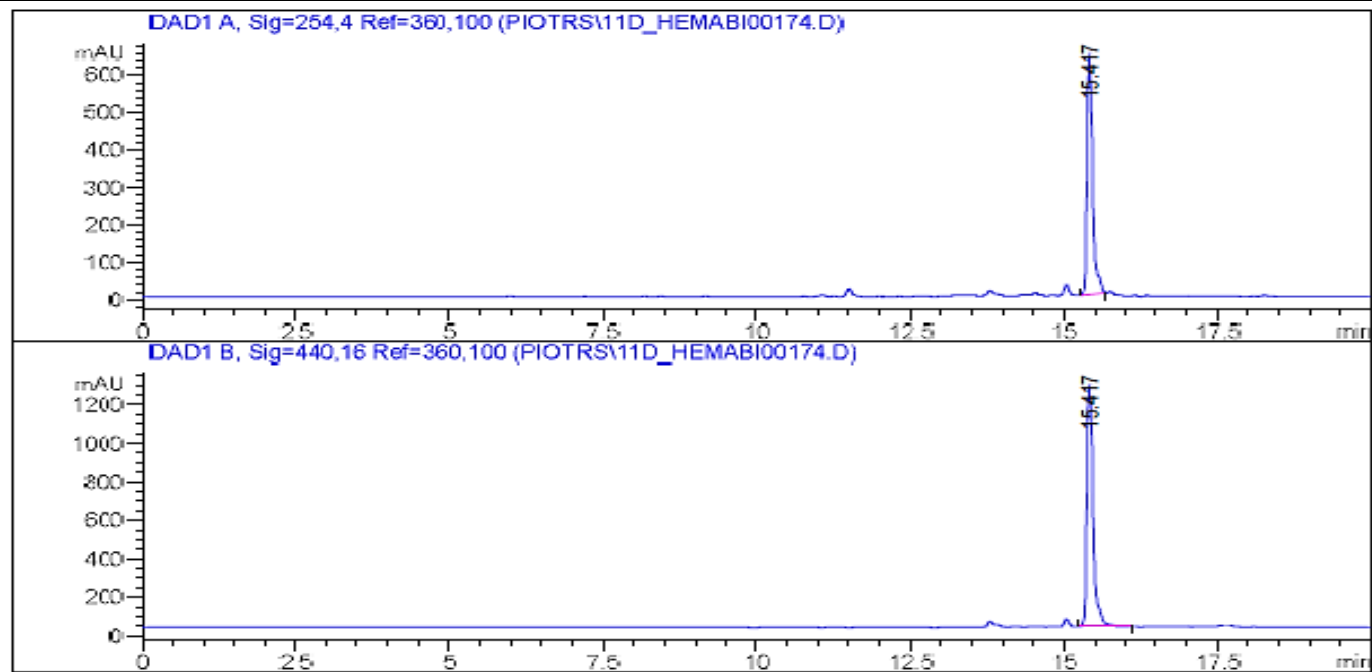

MS (-) ESI (Calc. [M-H]<sup>-</sup> C<sub>30</sub>H<sub>36</sub>N<sub>12</sub>O<sub>11</sub>P<sup>-</sup> : 771.2370, found: 771.23796)

200213\_Psu\_45 #2-64 RT: 0.02-0.68 AV: 63 NL: 1.11E6  
T: FTMS - p ESI Full ms [150.0000-2000.0000]

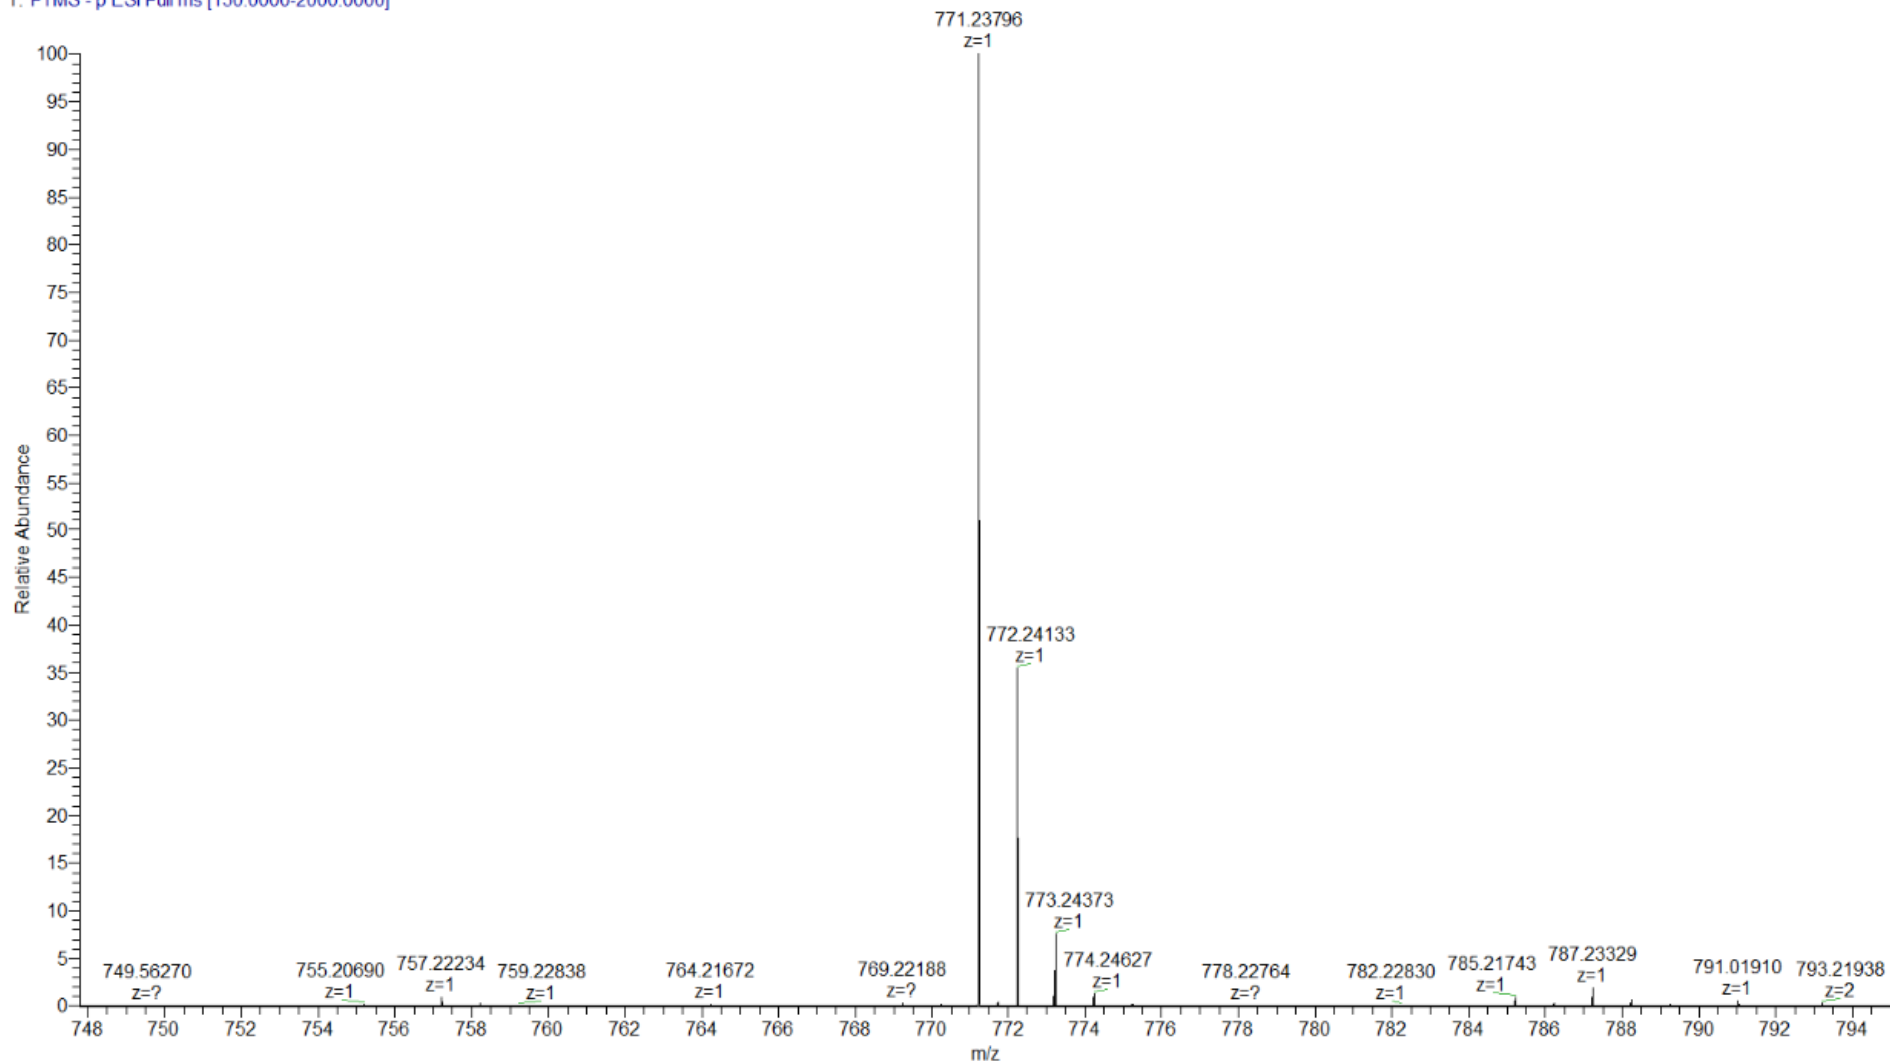

Compound 10d-2': GMP-2'-O-C(O)-NH-CH<sub>2</sub>-CH<sub>2</sub>-triazole-CH<sub>2</sub>-ACVJ (NH<sub>4</sub><sup>+</sup> salt)

Chemical structure

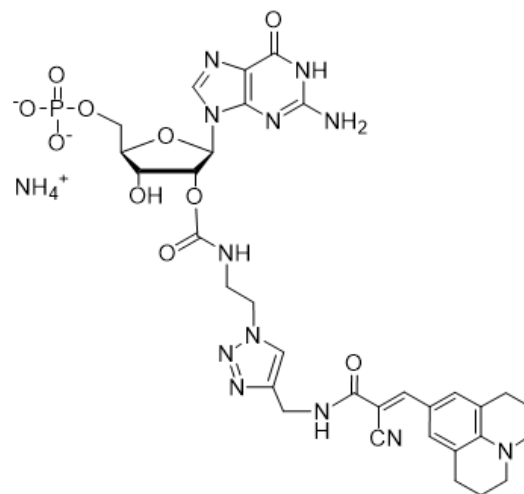

RP-HPLC (conditions c)

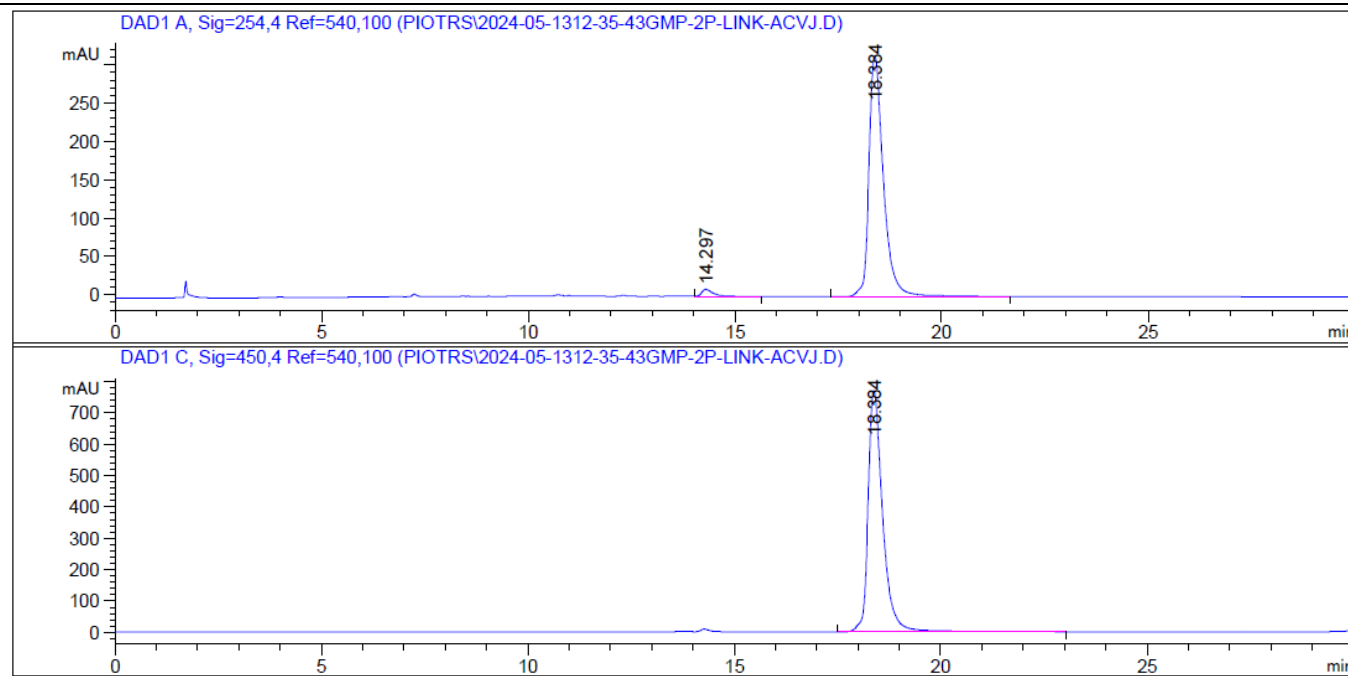

MS (-) ESI (Calc. [M-H]<sup>-</sup> C<sub>32</sub>H<sub>36</sub>N<sub>12</sub>O<sub>10</sub>P<sup>-</sup> : 779.2421, found: 779.24246)

200702\_PSU\_03 #6-50 RT: 0.06-0.48 AV: 45 NL: 2.12E7  
T: FTMS - p ESI Full ms [150.0000-2000.0000]

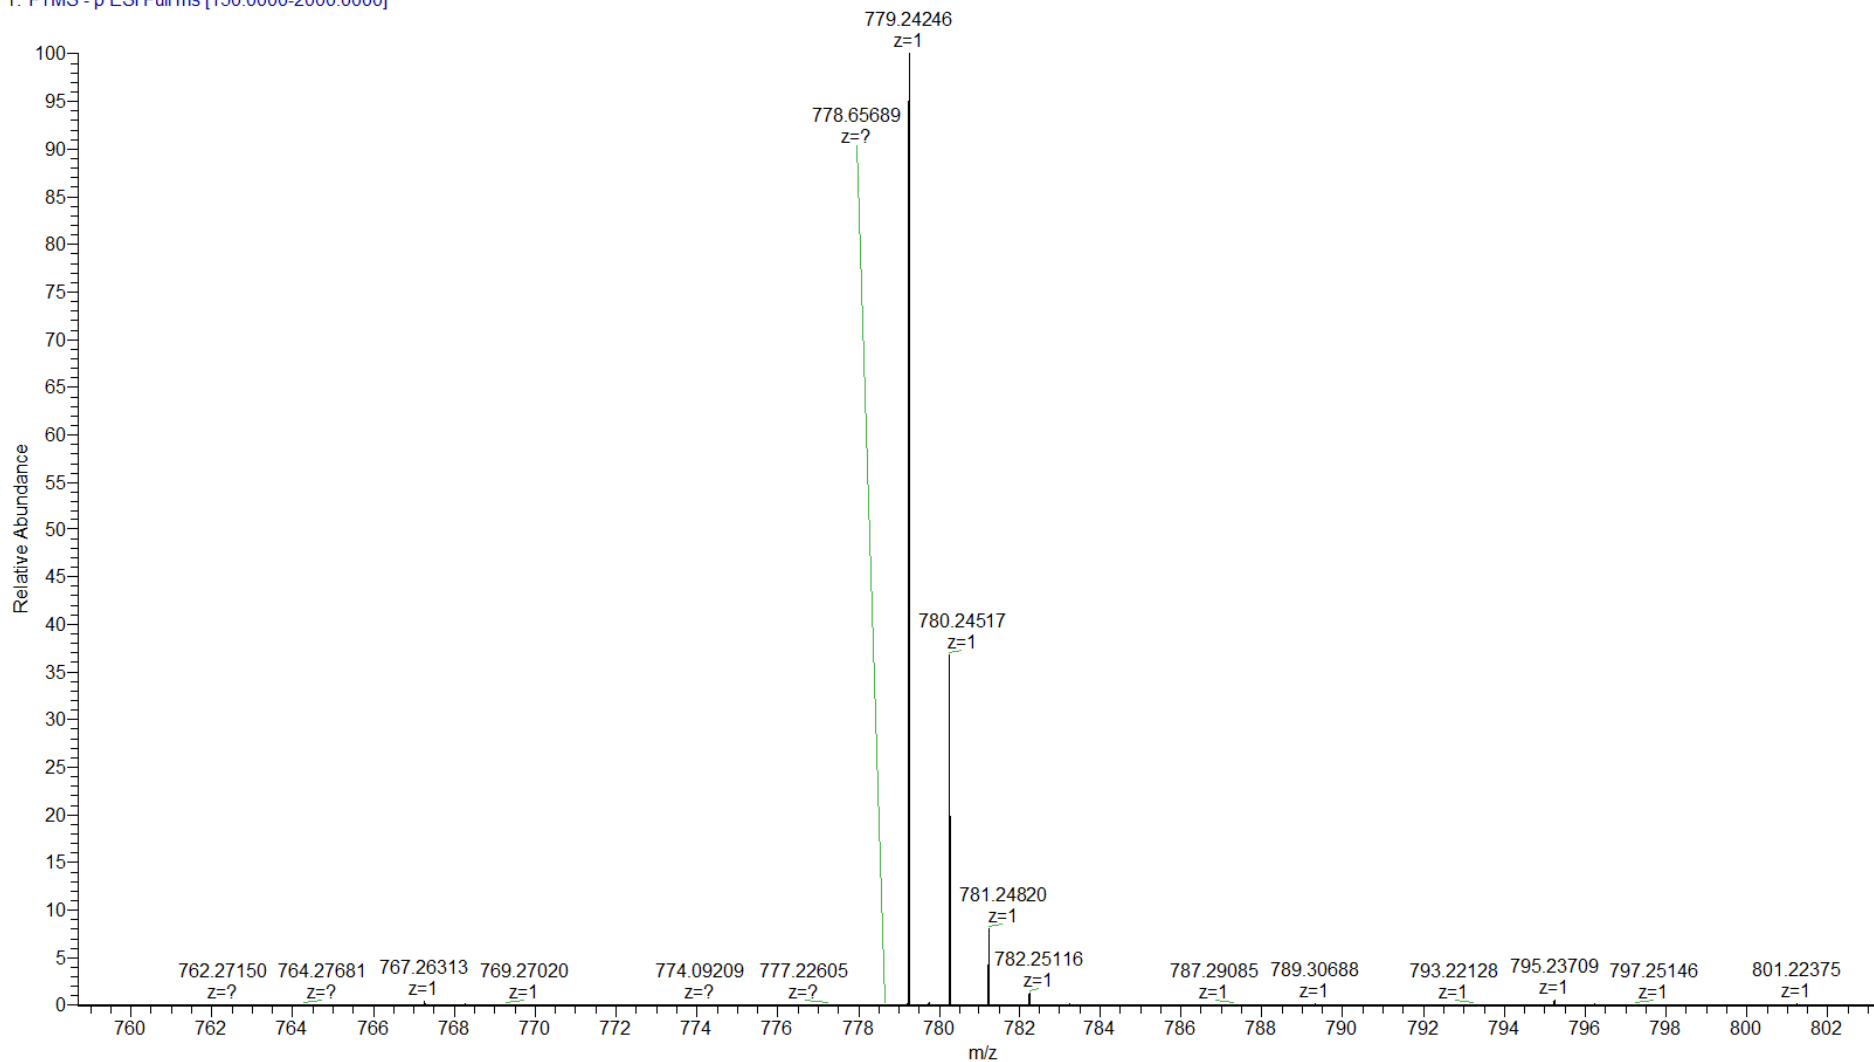

Compound 10d-3': GMP-3'-O-C(O)-NH-CH<sub>2</sub>-CH<sub>2</sub>-triazole-CH<sub>2</sub>-ACVJ (NH<sub>4</sub><sup>+</sup> salt)

Chemical structure

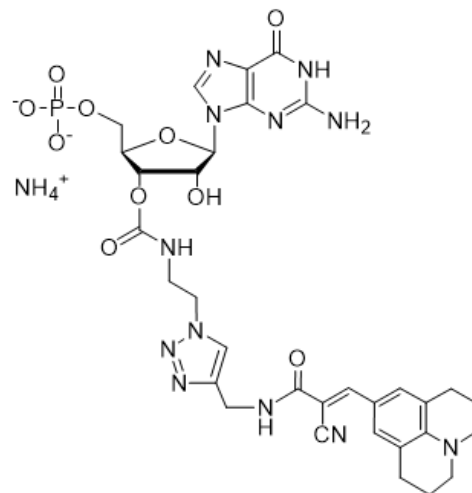

RP-HPLC (conditions c)

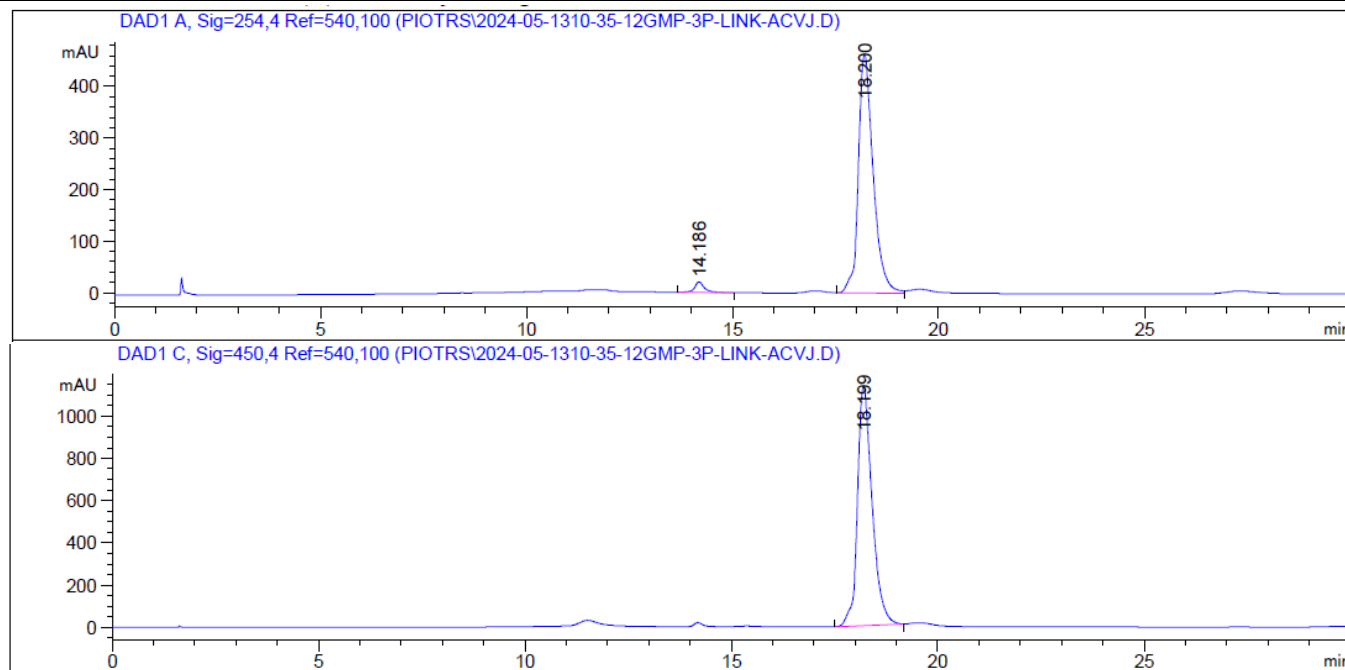

220114\_PSU\_16 #3-26 RT: 0.03-0.23 AV: 24 NL: 2.80E6  
T: FTMS - p ESI Full ms [200.0000-2000.0000]

MS (-) ESI (Calc. [M-H]<sup>-</sup> C<sub>32</sub>H<sub>36</sub>N<sub>2</sub>O<sub>10</sub>P<sup>-</sup> : 779.2421, found: 779.24286)

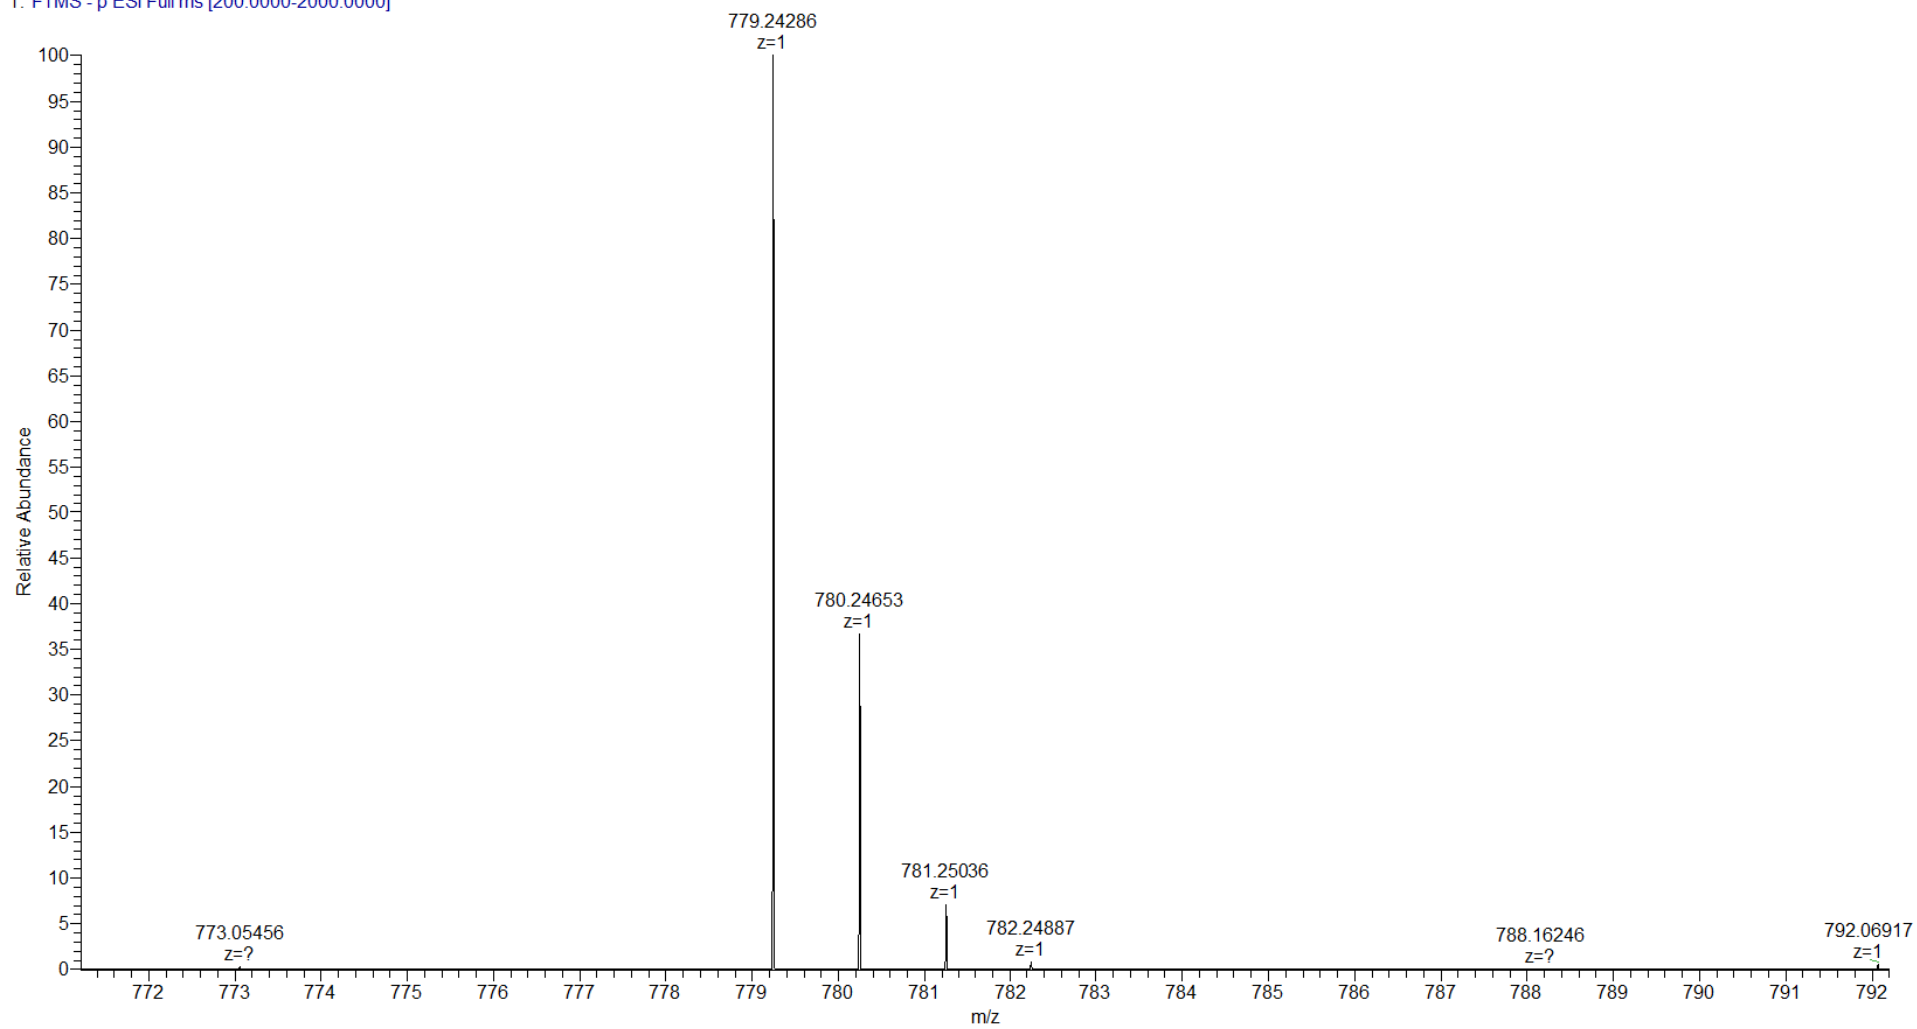



Compound 11b-2': GMP-2'-O-C(O)-NH-CH<sub>2</sub>-triazole-CH<sub>2</sub>CH<sub>2</sub>-oHBI (NH<sub>4</sub><sup>+</sup> salt)

Chemical structure

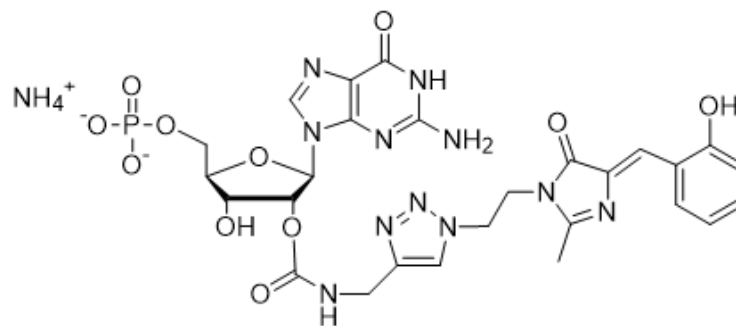

RP-HPLC (conditions c)

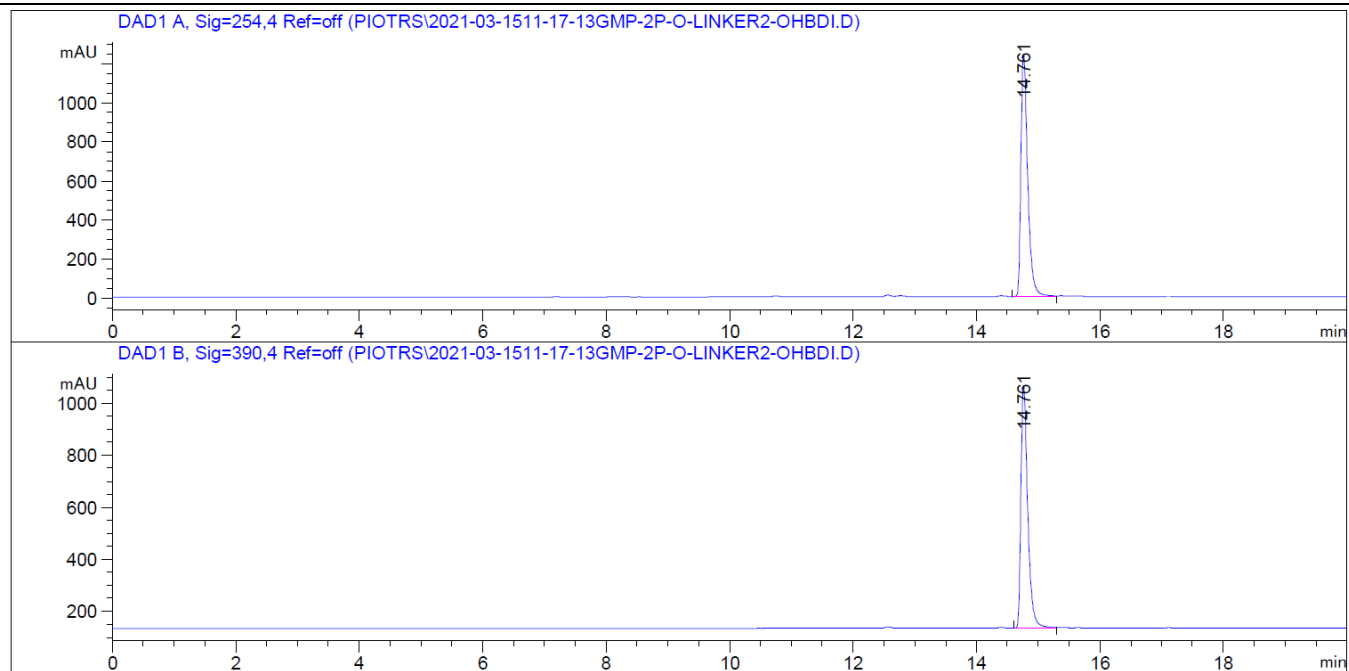

MS (-) ESI (Calc. [M-H]<sup>-</sup> C<sub>27</sub>H<sub>29</sub>N<sub>11</sub>O<sub>11</sub>P<sup>-</sup> : 714.1791, found: 714.18001)

220331\_PSu\_09 #10-54 RT: 0.09-0.47 AV: 45 NL: 2.76E7  
T: FTMS - p ESI Full ms [160.0000-2000.0000]

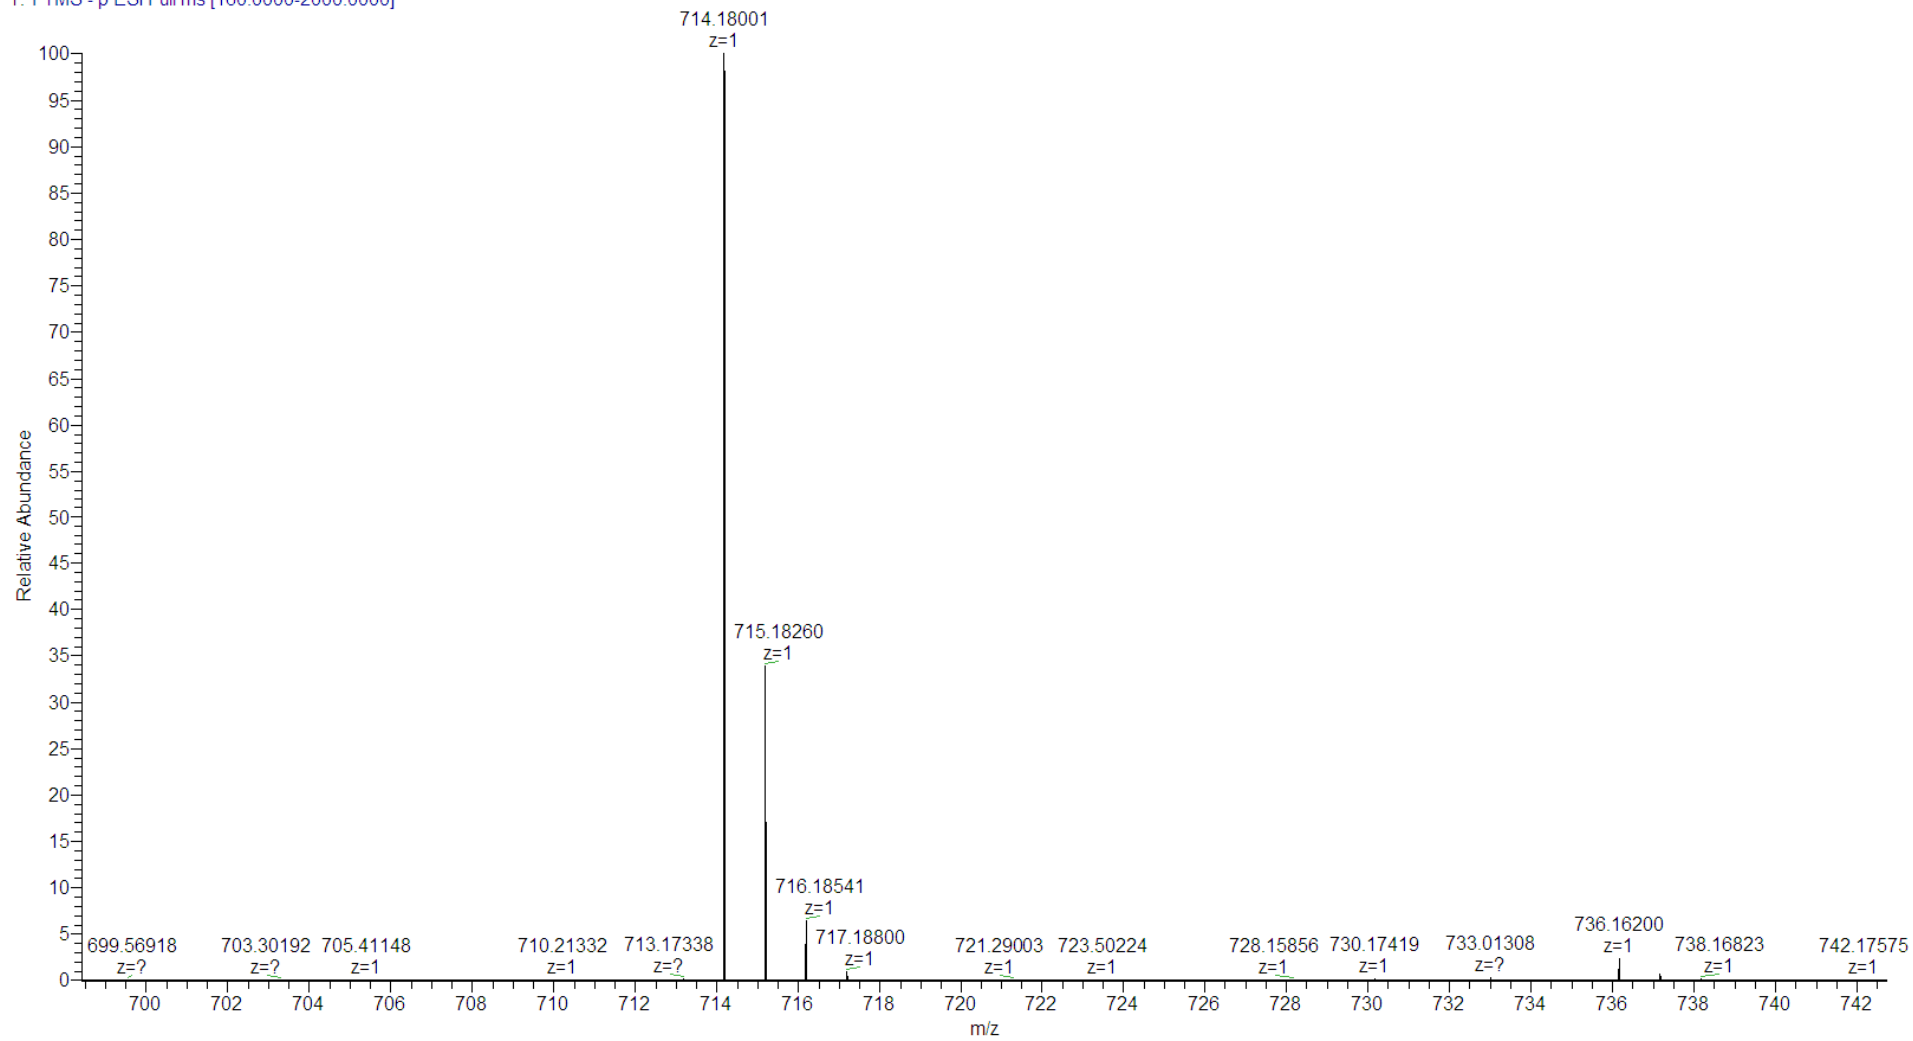

Compound 11b-3': GMP-3'-O-C(O)-NH-CH<sub>2</sub>-triazole-CH<sub>2</sub>CH<sub>2</sub>-oHBI (NH<sub>4</sub><sup>+</sup> salt)

Chemical structure

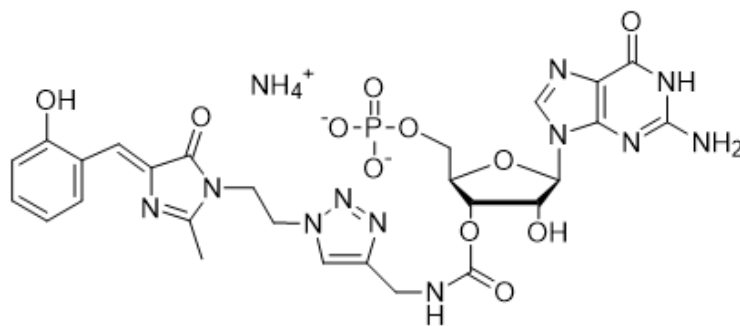

RP-HPLC (conditions c)

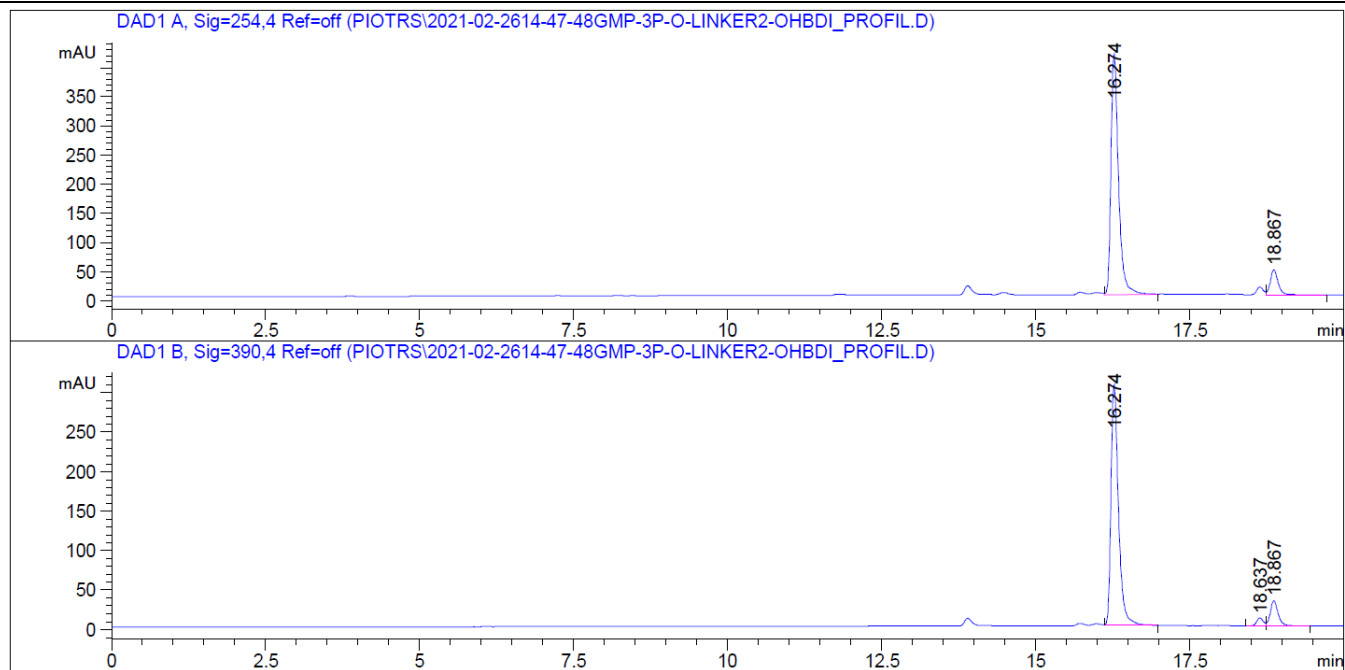

MS (-) ESI (Calc. [M-H]<sup>-</sup> C<sub>27</sub>H<sub>29</sub>N<sub>11</sub>O<sub>11</sub>P<sup>-</sup> : 714.1791, found: 714.17965)

210504\_PSu\_16\_b #4-92 RT: 0.04-0.87 AV: 89 NL: 7.66E7  
T: FTMS - p ESI Full ms [150.0000-2000.0000]

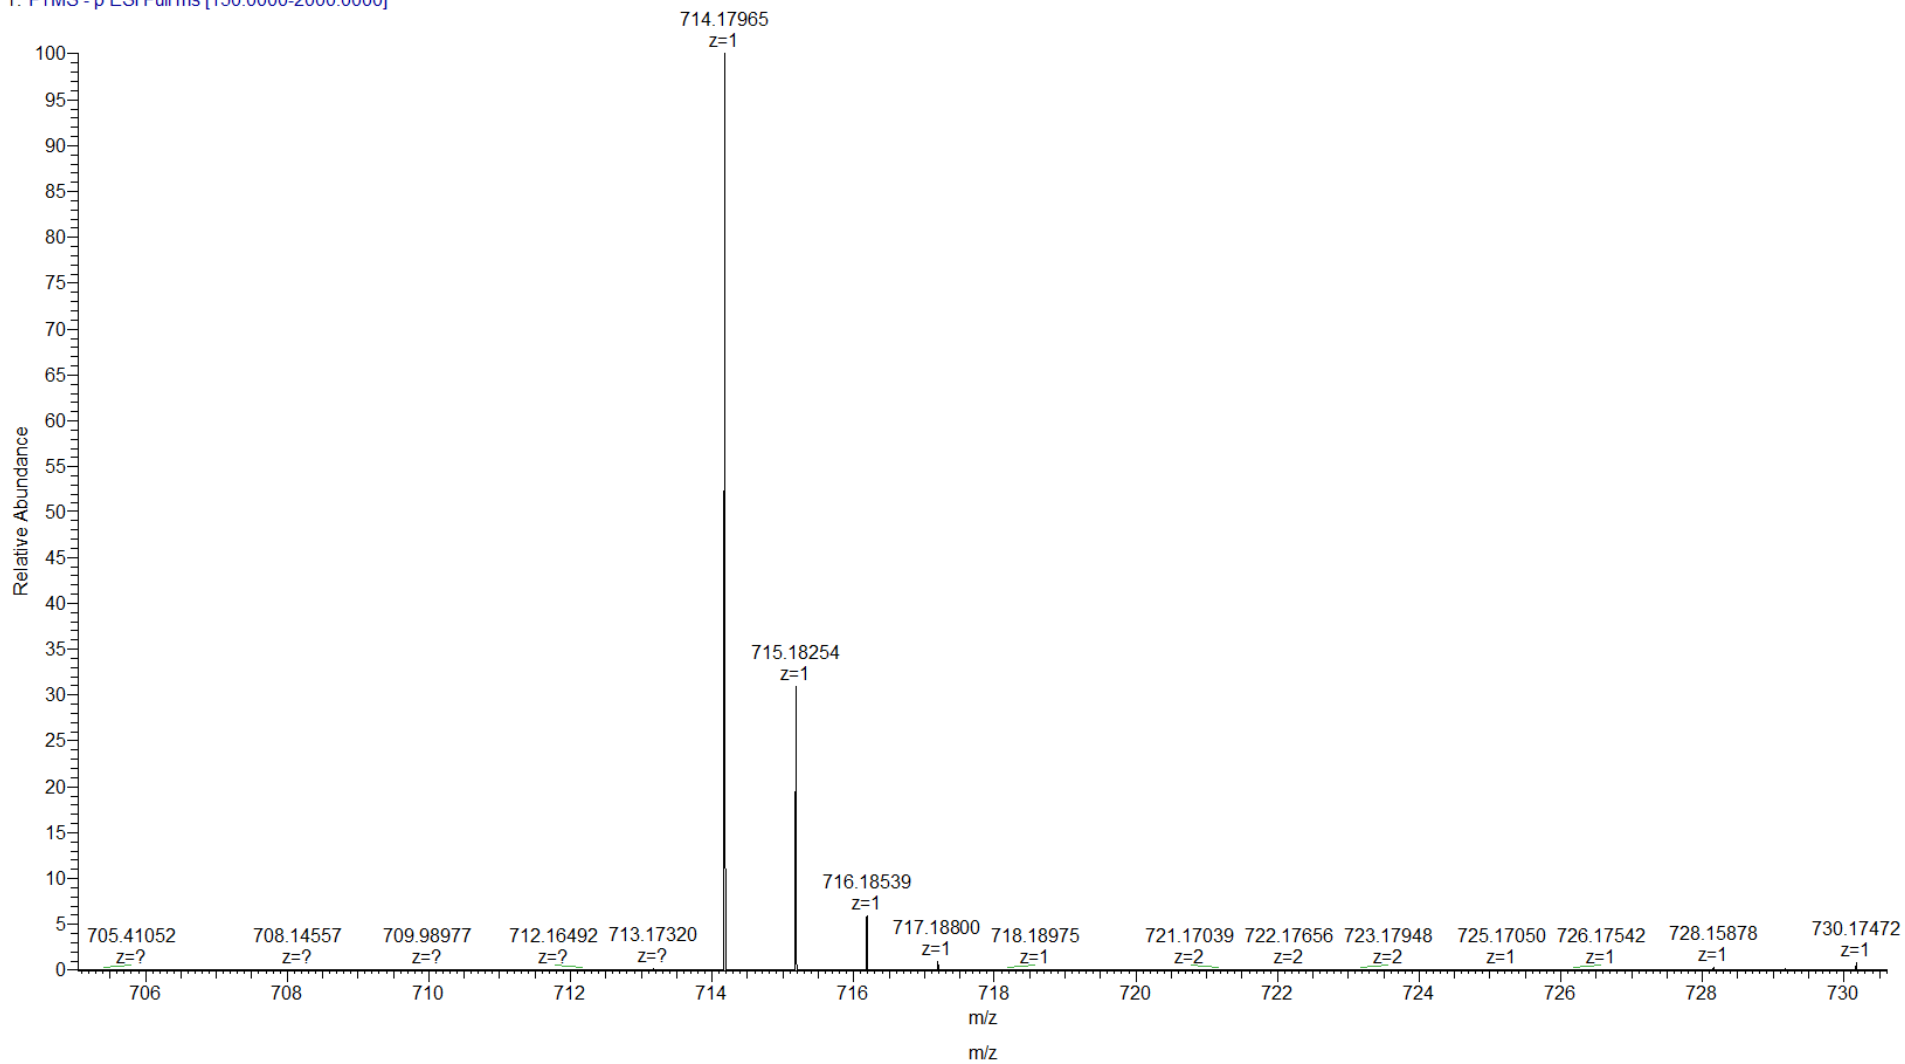

Compound 12a: phosphonate-CH<sub>2</sub>-triazole-CH<sub>2</sub>-DMHBI (NH<sub>4</sub><sup>+</sup> salt)

Chemical structure

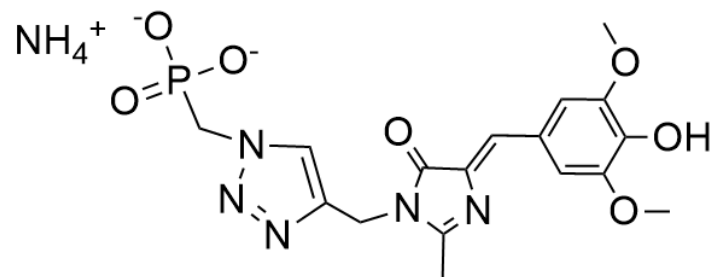

RP-HPLC (conditions c)

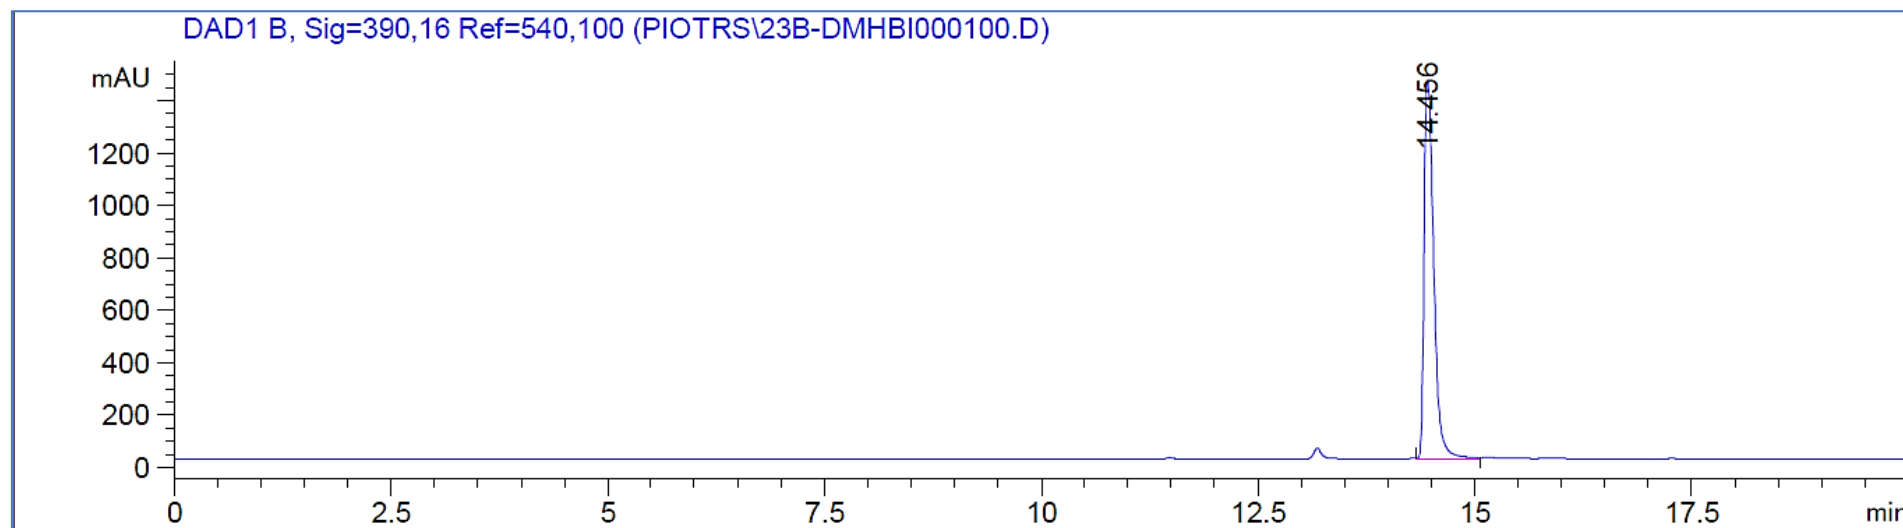

MS (-) ESI (Calc. [M-H]<sup>-</sup> C<sub>17</sub>H<sub>19</sub>N<sub>5</sub>O<sub>7</sub>P<sup>-</sup> : 436.1028, found: 436.10287)

200213\_Psu\_39 #12-89 RT: 0.12-0.91 AV: 78 NL: 1.06E7  
T: FTMS - p ESI Full ms [150.0000-2000.0000]

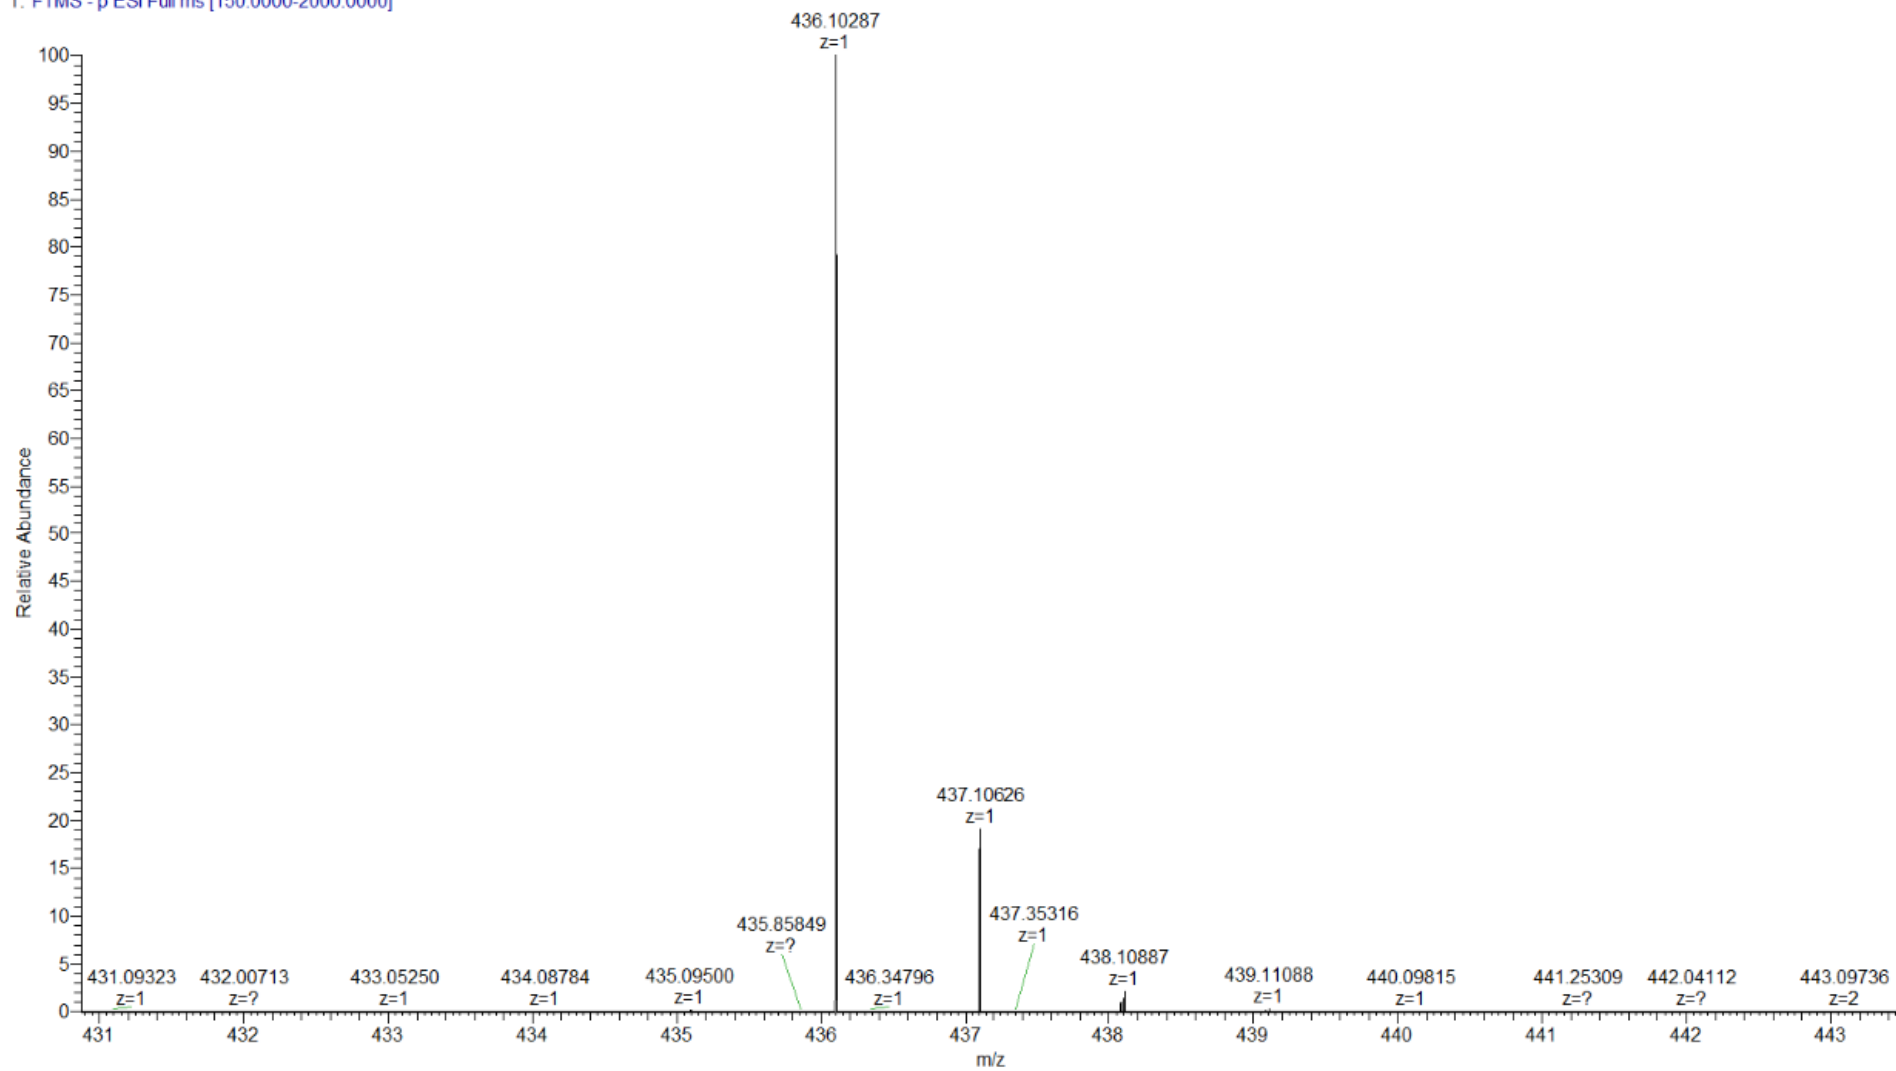

Compound 12b: phosphonate-CH<sub>2</sub>-triazole-CH<sub>2</sub>-oHBI (NH<sub>4</sub><sup>+</sup> salt)

Chemical structure

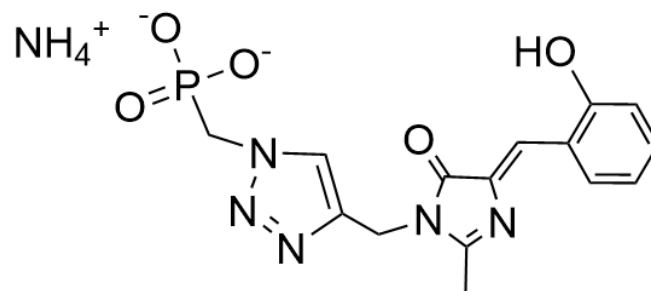

RP-HPLC (conditions c)

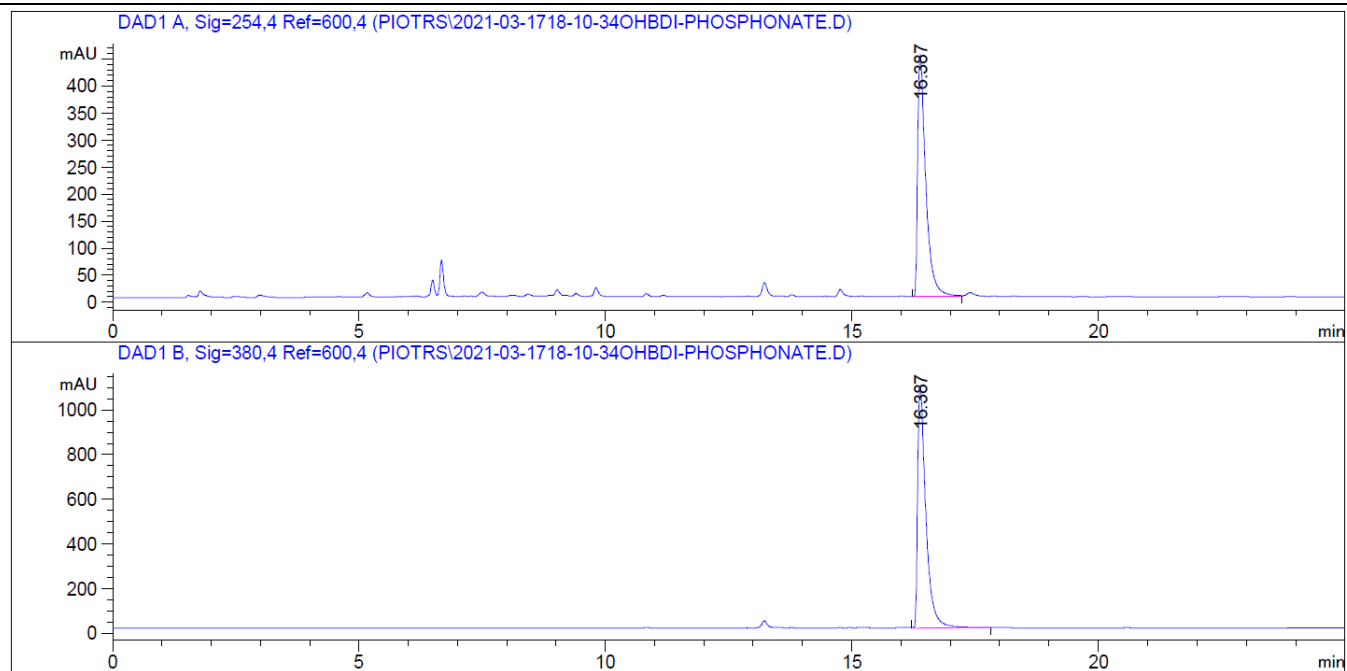

210629\_PSu\_7 #9-44 RT: 0.08-0.38 AV: 36 NL: 1.84E8  
T: FTMS - p ESI Full ms [160.0000-2000.0000]

MS (-) ESI (Calc. [M-H]<sup>-</sup> C<sub>15</sub>H<sub>15</sub>N<sub>5</sub>O<sub>5</sub>P<sup>-</sup> : 376.0816, found: 376.08196)

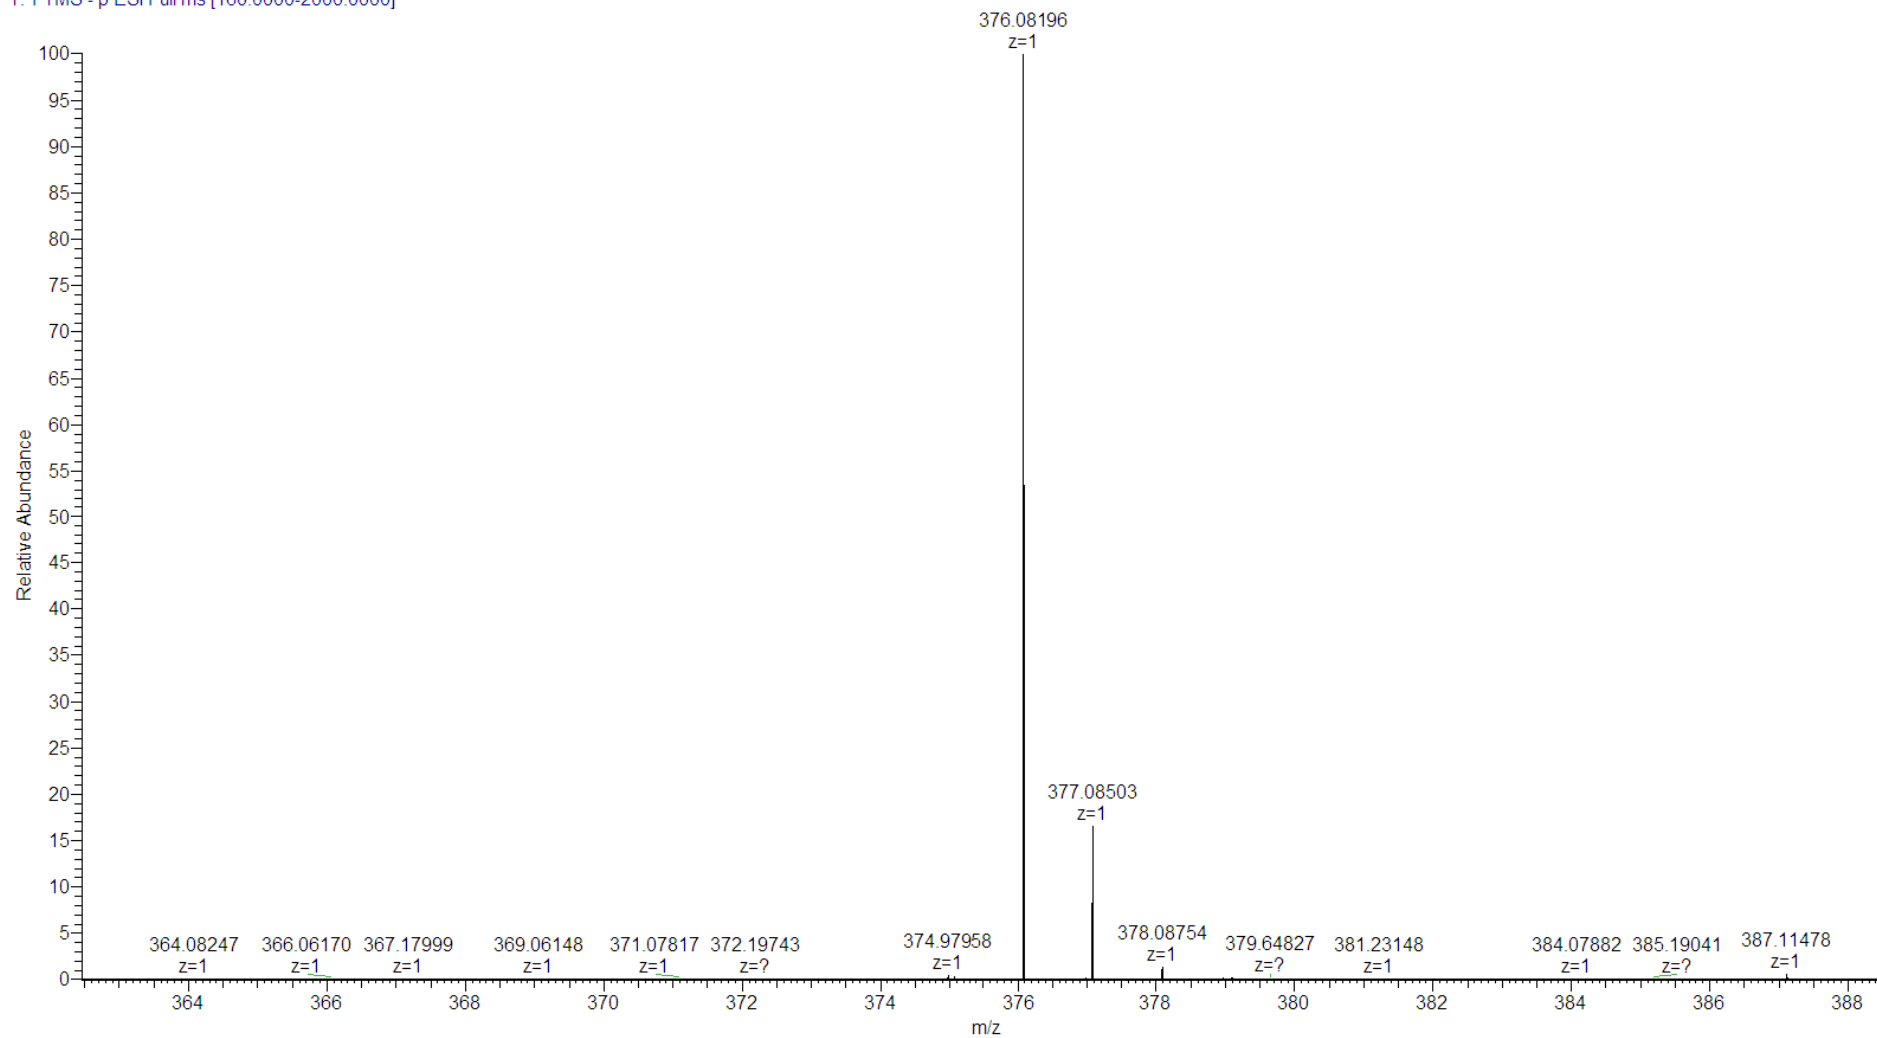



Compound 12c: phosphonate-CH<sub>2</sub>-triazole-CH<sub>2</sub>-HEMABI (NH<sub>4</sub><sup>+</sup> salt)

Chemical structure

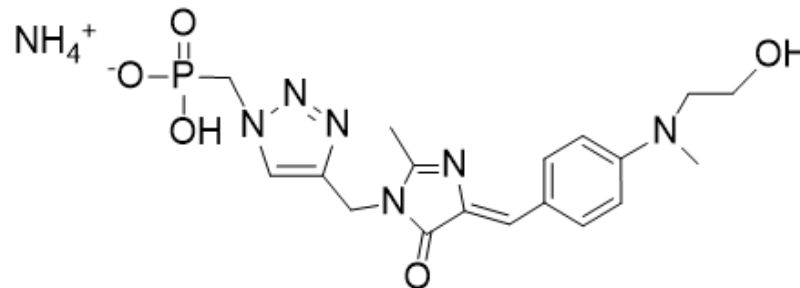

RP-HPLC (conditions c)

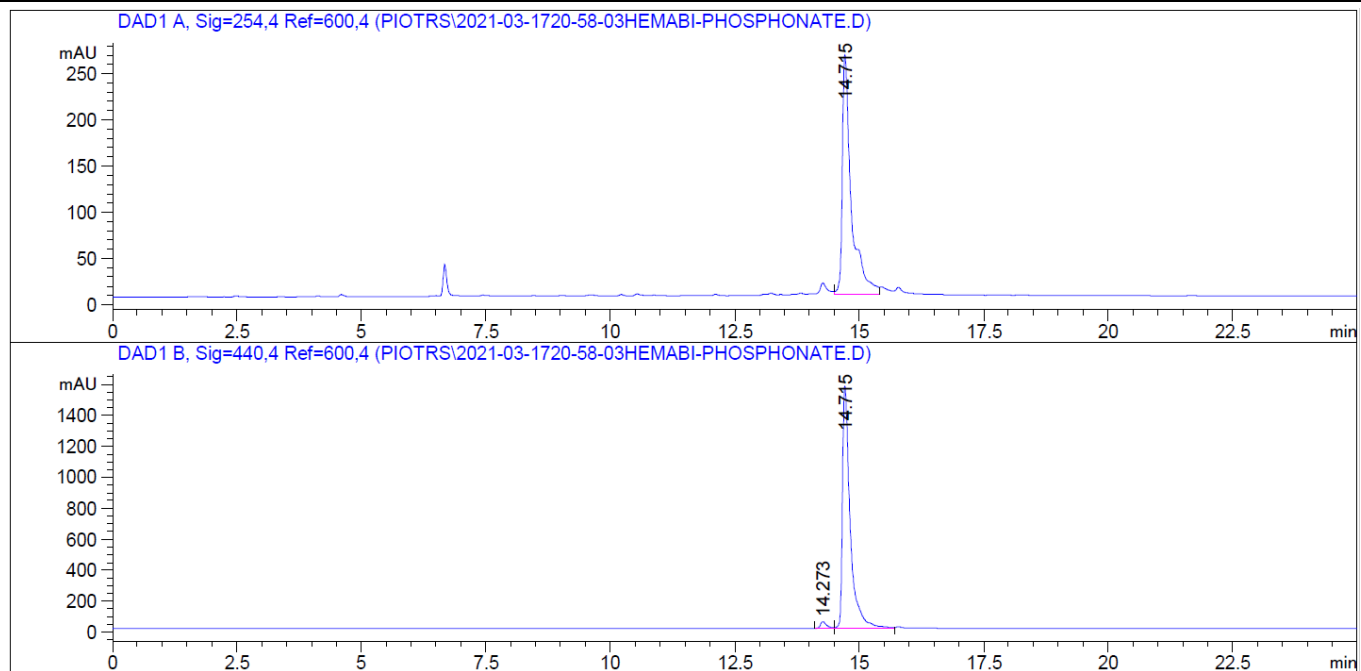

MS (-) ESI (Calc. [M-H]<sup>-</sup> C<sub>18</sub>H<sub>22</sub>N<sub>6</sub>O<sub>5</sub>P<sup>-</sup> : 433.1395, found: 433.13962)

200213\_Psu\_40 #6-50 RT: 0.06-0.51 AV: 45 NL: 2.33E6  
T: FTMS -p ESI Full ms [150.0000-2000.0000]

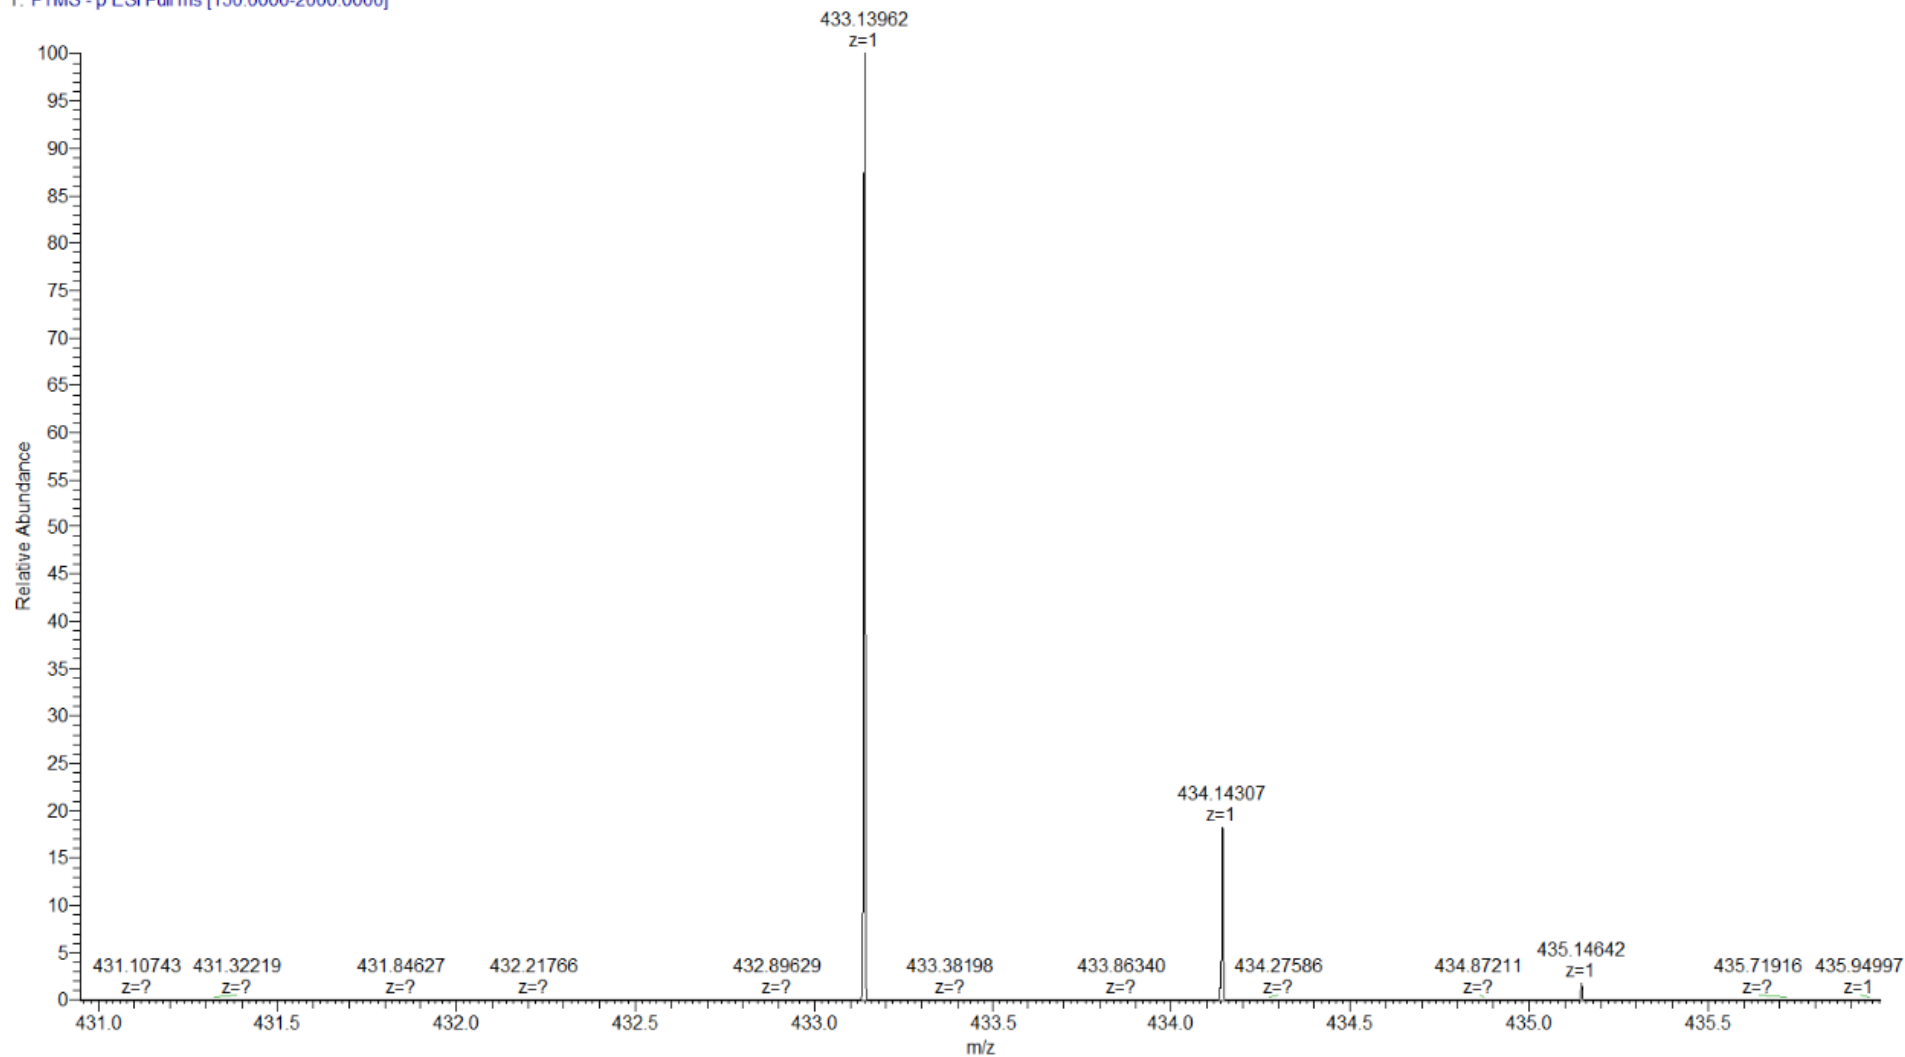

Compound 12d: phosphonate-CH<sub>2</sub>-triazole-CH<sub>2</sub>-ACVJ (NH<sub>4</sub><sup>+</sup> salt)

Chemical structure

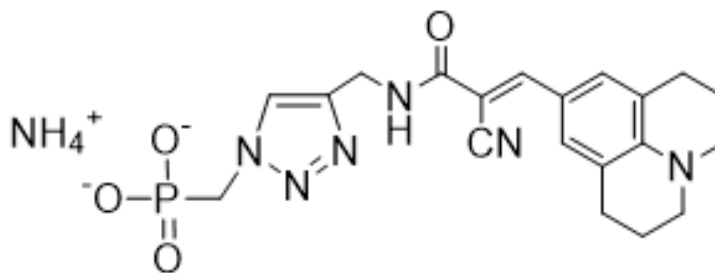

RP-HPLC (conditions b)

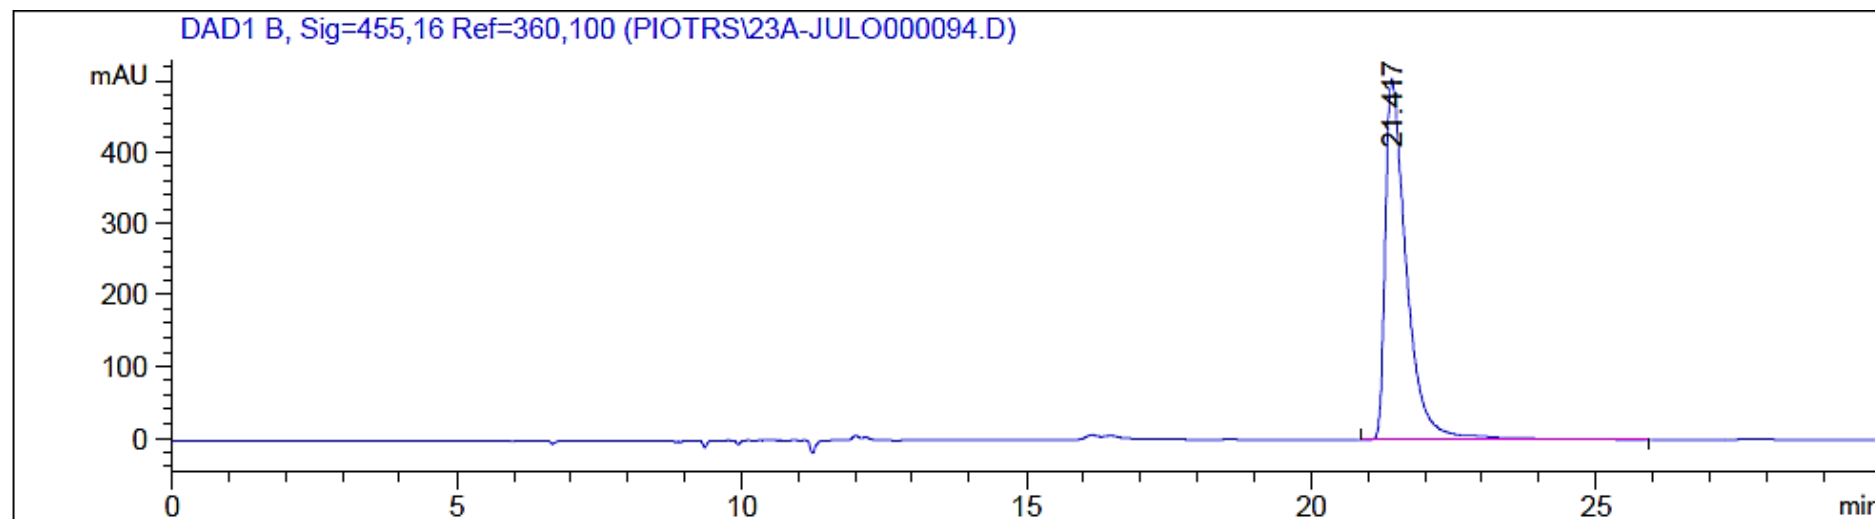

MS (-) ESI (Calc. [M-H]<sup>-</sup> C<sub>20</sub>H<sub>22</sub>N<sub>6</sub>O<sub>4</sub>P<sup>-</sup>: 441.1446, found: 441.14495)

200213\_Psu\_41 #5-42 RT: 0.05-0.44 AV: 38 NL: 1.42E6  
T: FTMS - p ESI Full ms [150.0000-2000.0000]

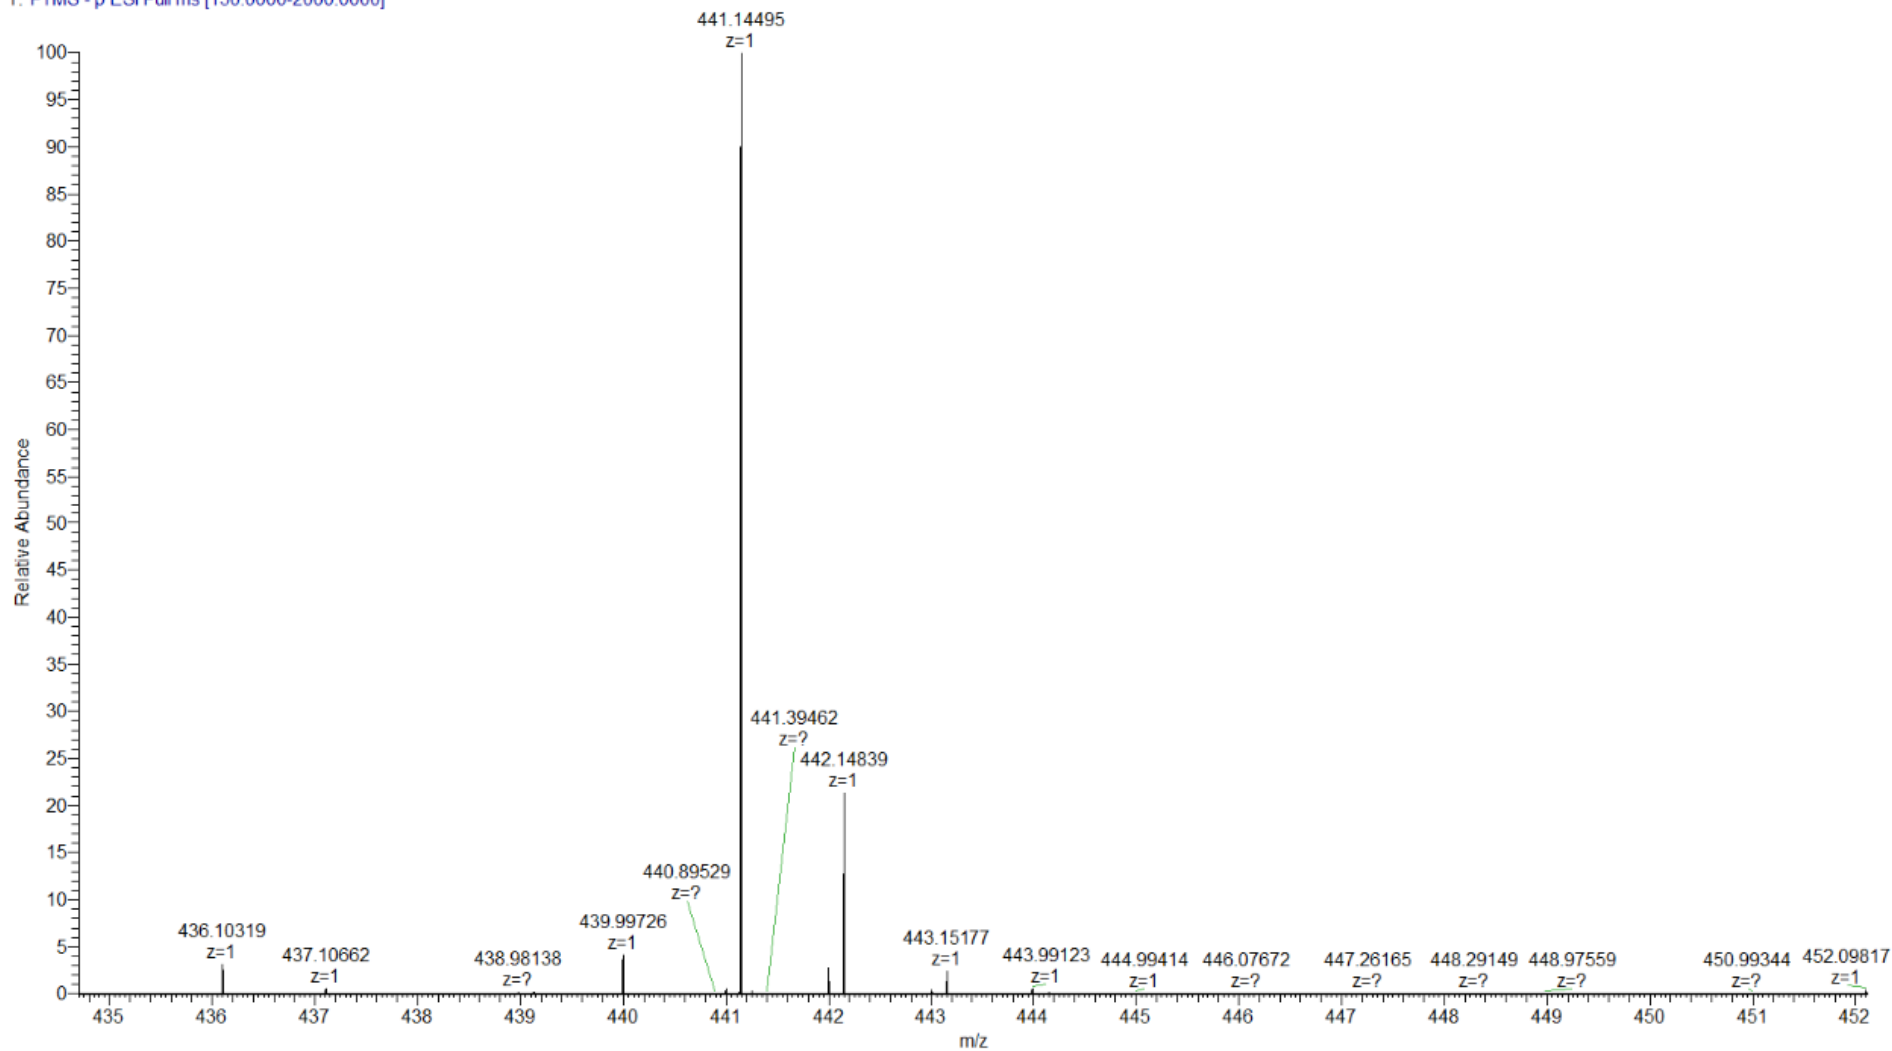

Compound 13: Im-GDP-2'+3'-O-C(O)-NH-CH<sub>2</sub>CH<sub>2</sub>-N<sub>3</sub> (NH<sub>4</sub><sup>+</sup> salt)

Chemical structure

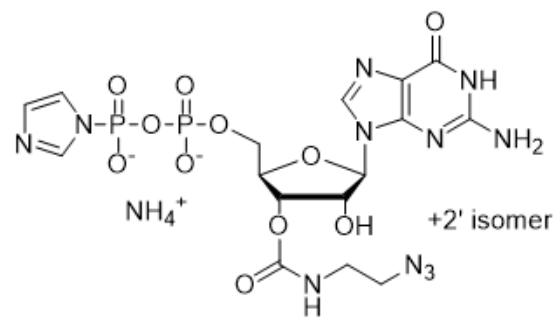

MS (-) ESI (Calc. [M-H]<sup>-</sup> C<sub>16</sub>H<sub>20</sub>N<sub>11</sub>O<sub>11</sub>P<sub>2</sub>: 604.0825, found: 604.08309)

90415\_Psu-4 #7-46 RT: 0.07-0.44 AV: 40 NL: 2.46E7  
T: FTMS - p ESI Full ms [150.0000-2000.0000]

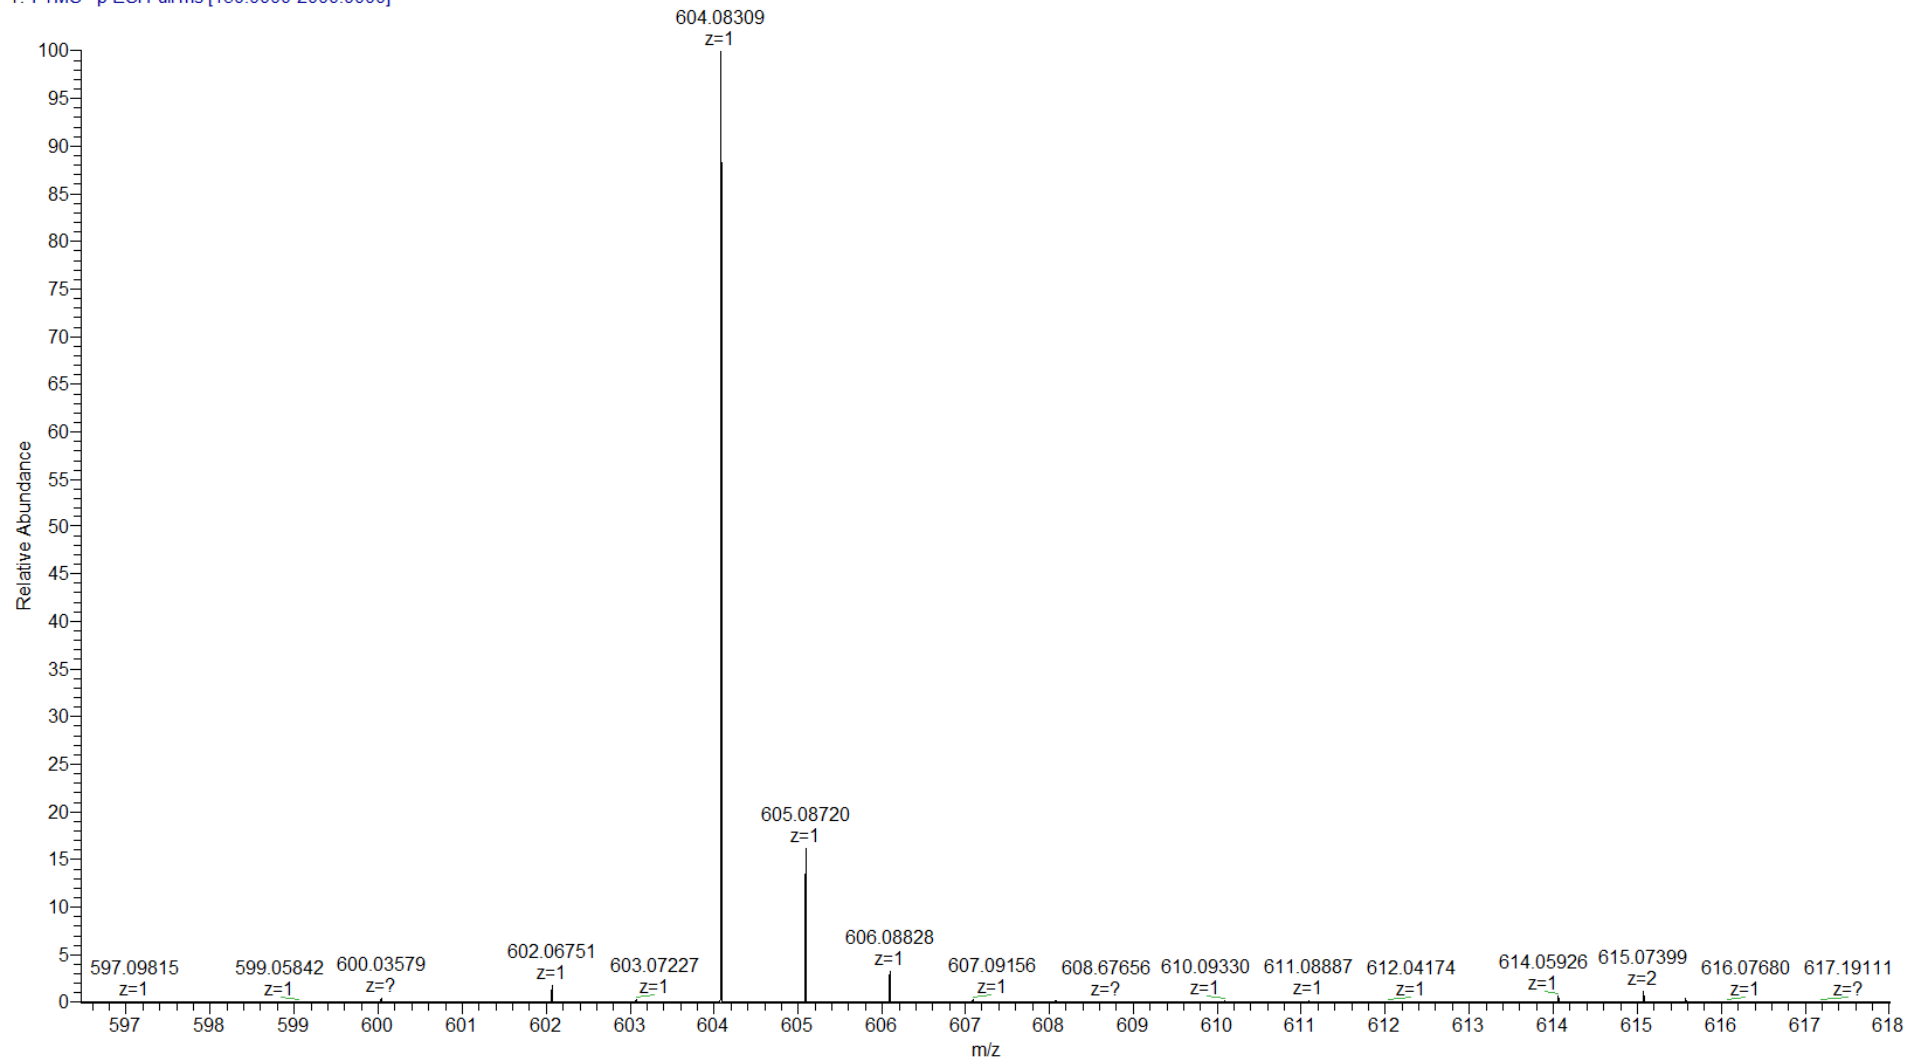

Compound 14: Im-GpCH<sub>2</sub>p-2'+3'-O-C(O)-NH-CH<sub>2</sub>CH<sub>2</sub>-N<sub>3</sub> (NH<sub>4</sub><sup>+</sup> salt)

Chemical structure

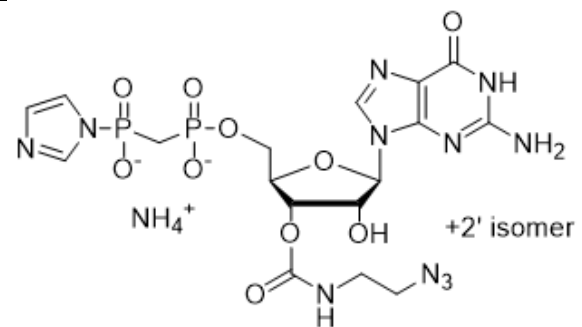

MS (-) ESI (Calc. [M-H]<sup>-</sup> C<sub>14</sub>H<sub>20</sub>N<sub>9</sub>O<sub>11</sub>P<sub>2</sub>: 552.0763, found: 552.07689)

220407\_PSu\_09 #132-212 RT: 1.15-1.85 AV: 81 NL: 7.95E6  
T: FTMS - p ESI Full ms [160.0000-2000.0000]

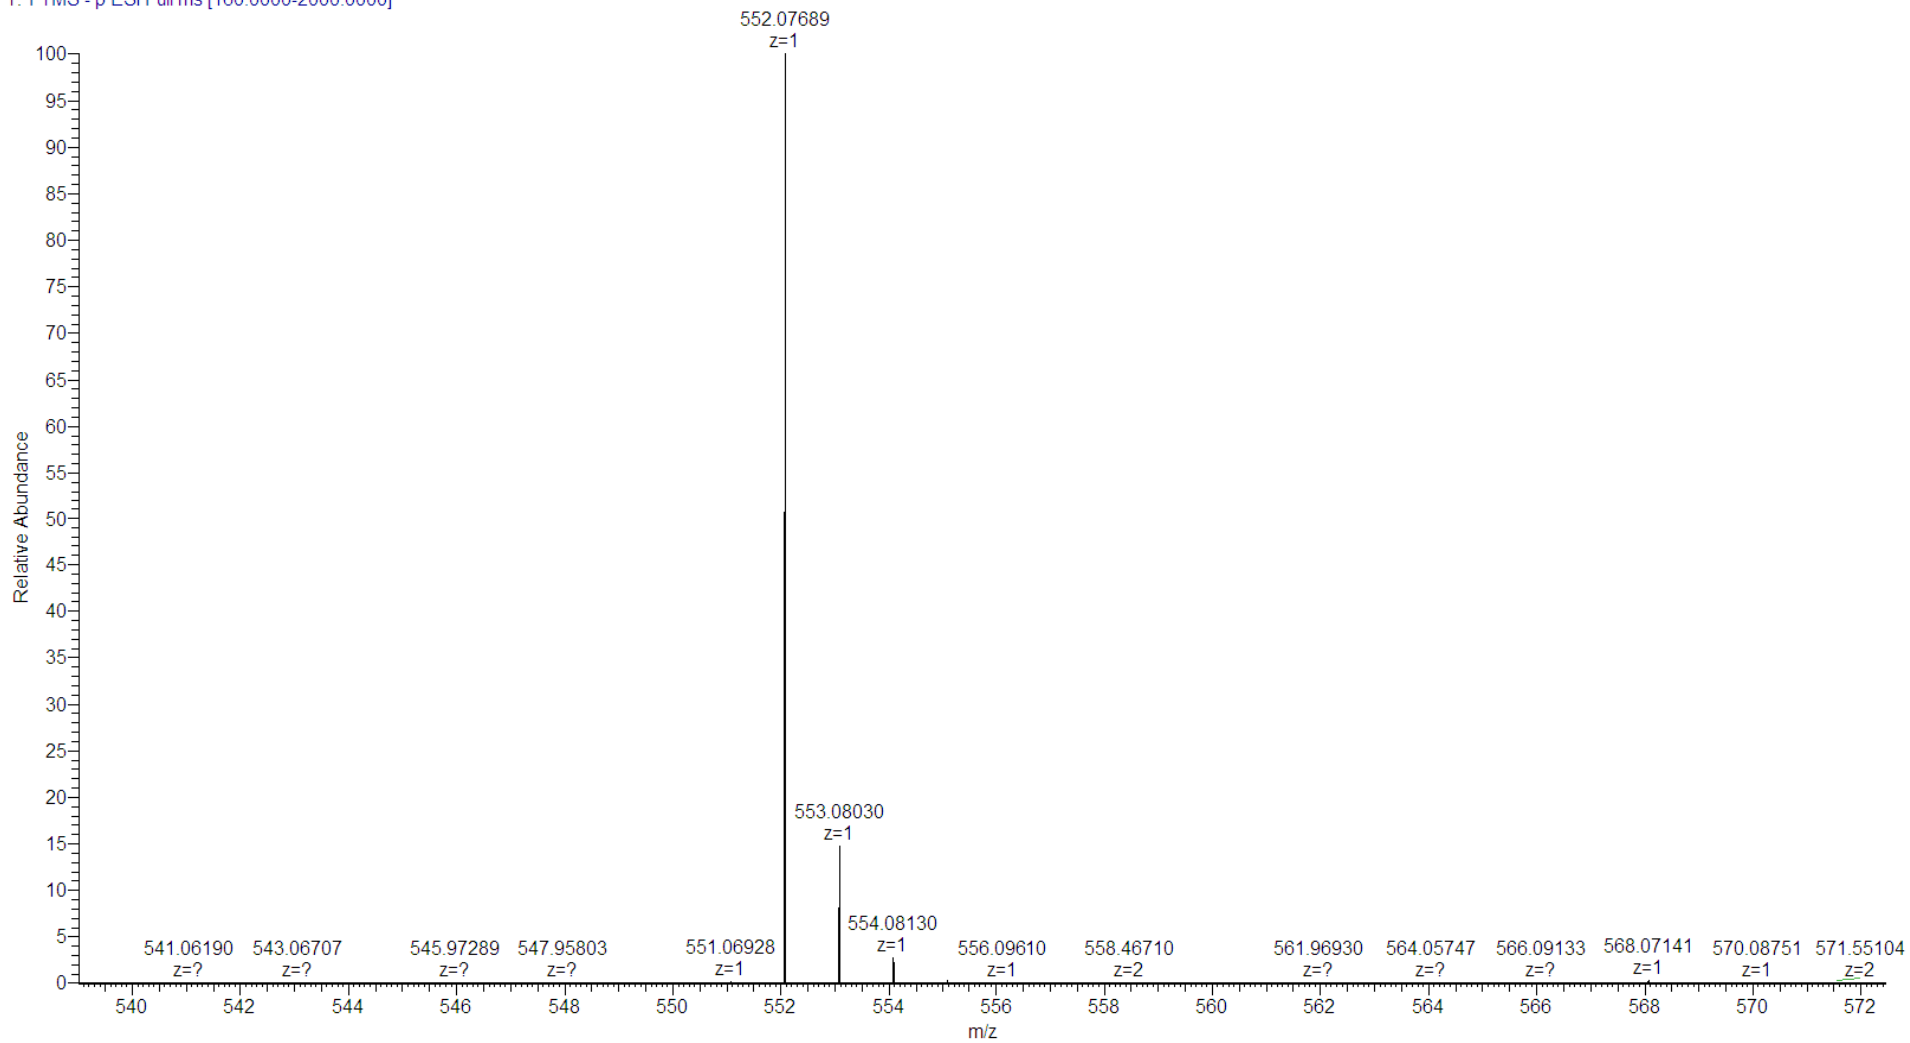



Compound 15: Im-ADP-2'+3'-O-C(O)-NH-CH<sub>2</sub>CH<sub>2</sub>-N<sub>3</sub> (NH<sub>4</sub><sup>+</sup> salt)

Chemical structure

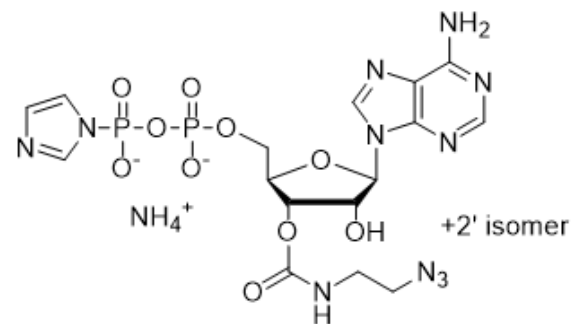

RP-HPLC (conditions c)

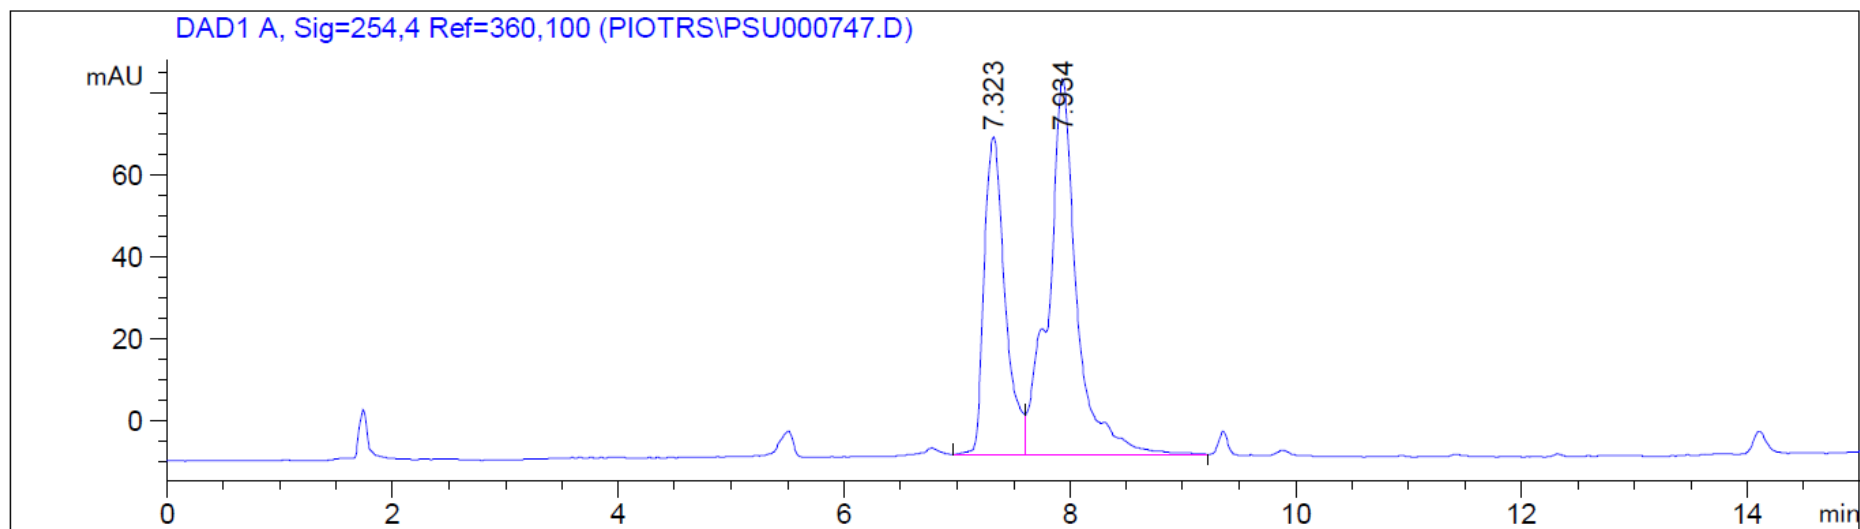

220407\_PSu\_07 #13-82 RT: 0.11-0.72 AV: 70 NL: 3.87E7  
T: FTMS - p ESI Full ms [160.0000-2000.0000]

MS (-) ESI (Calc. [M-H]<sup>-</sup> C<sub>16</sub>H<sub>20</sub>N<sub>11</sub>O<sub>10</sub>P<sub>2</sub>: 588.0875, found: 588.08811)

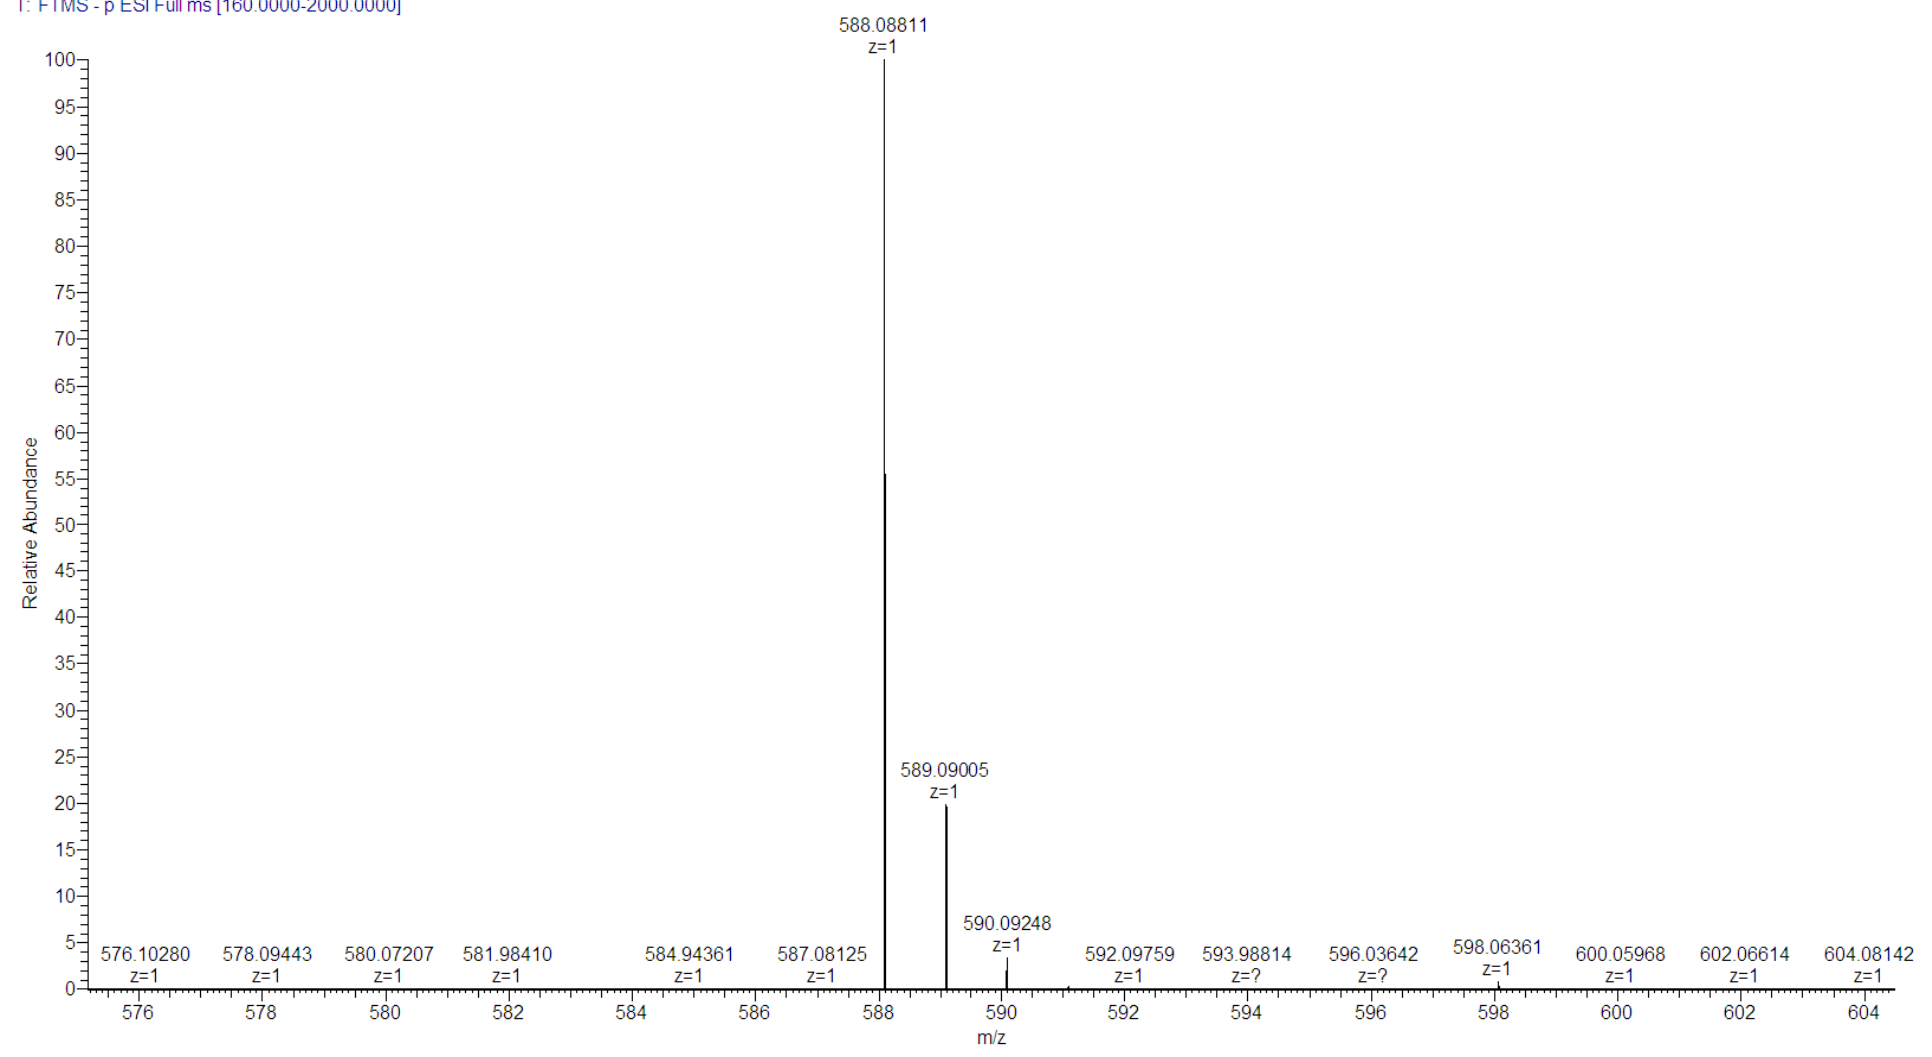

Compound 16: 5'-I-Guo-2'+3'-O-C(O)-NH-C<sub>3</sub>H<sub>3</sub>

Chemical structure

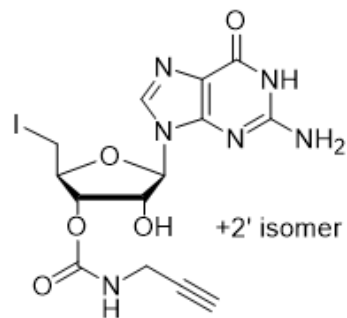

RP-HPLC (conditions c)

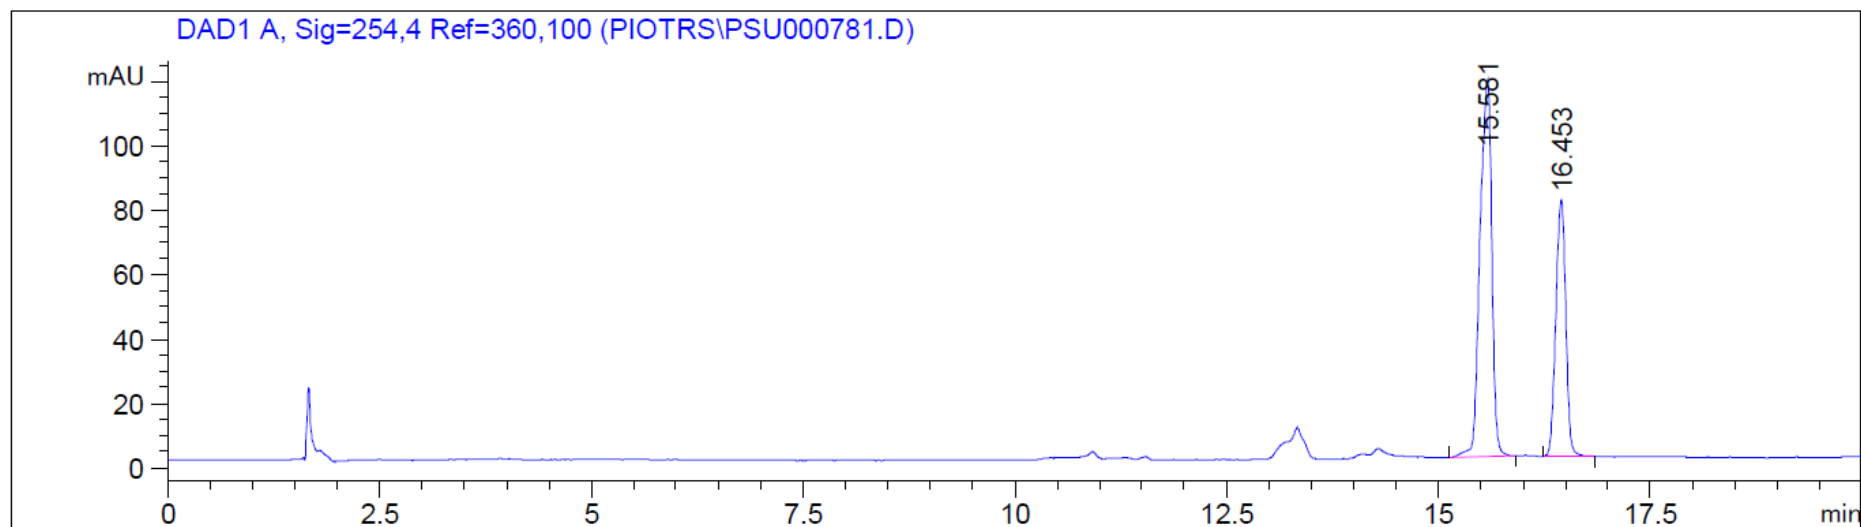

220413\_PSu\_01 #32-127 RT: 0.28-1.11 AV: 96 NL: 2.50E6  
T: FTMS - p ESI Full ms [160.0000-2000.0000]

MS (-) ESI (Calc. [M-H]<sup>-</sup> C<sub>14</sub>H<sub>14</sub>IN<sub>6</sub>O<sub>5</sub> : 473.0076, found: 473.00793)

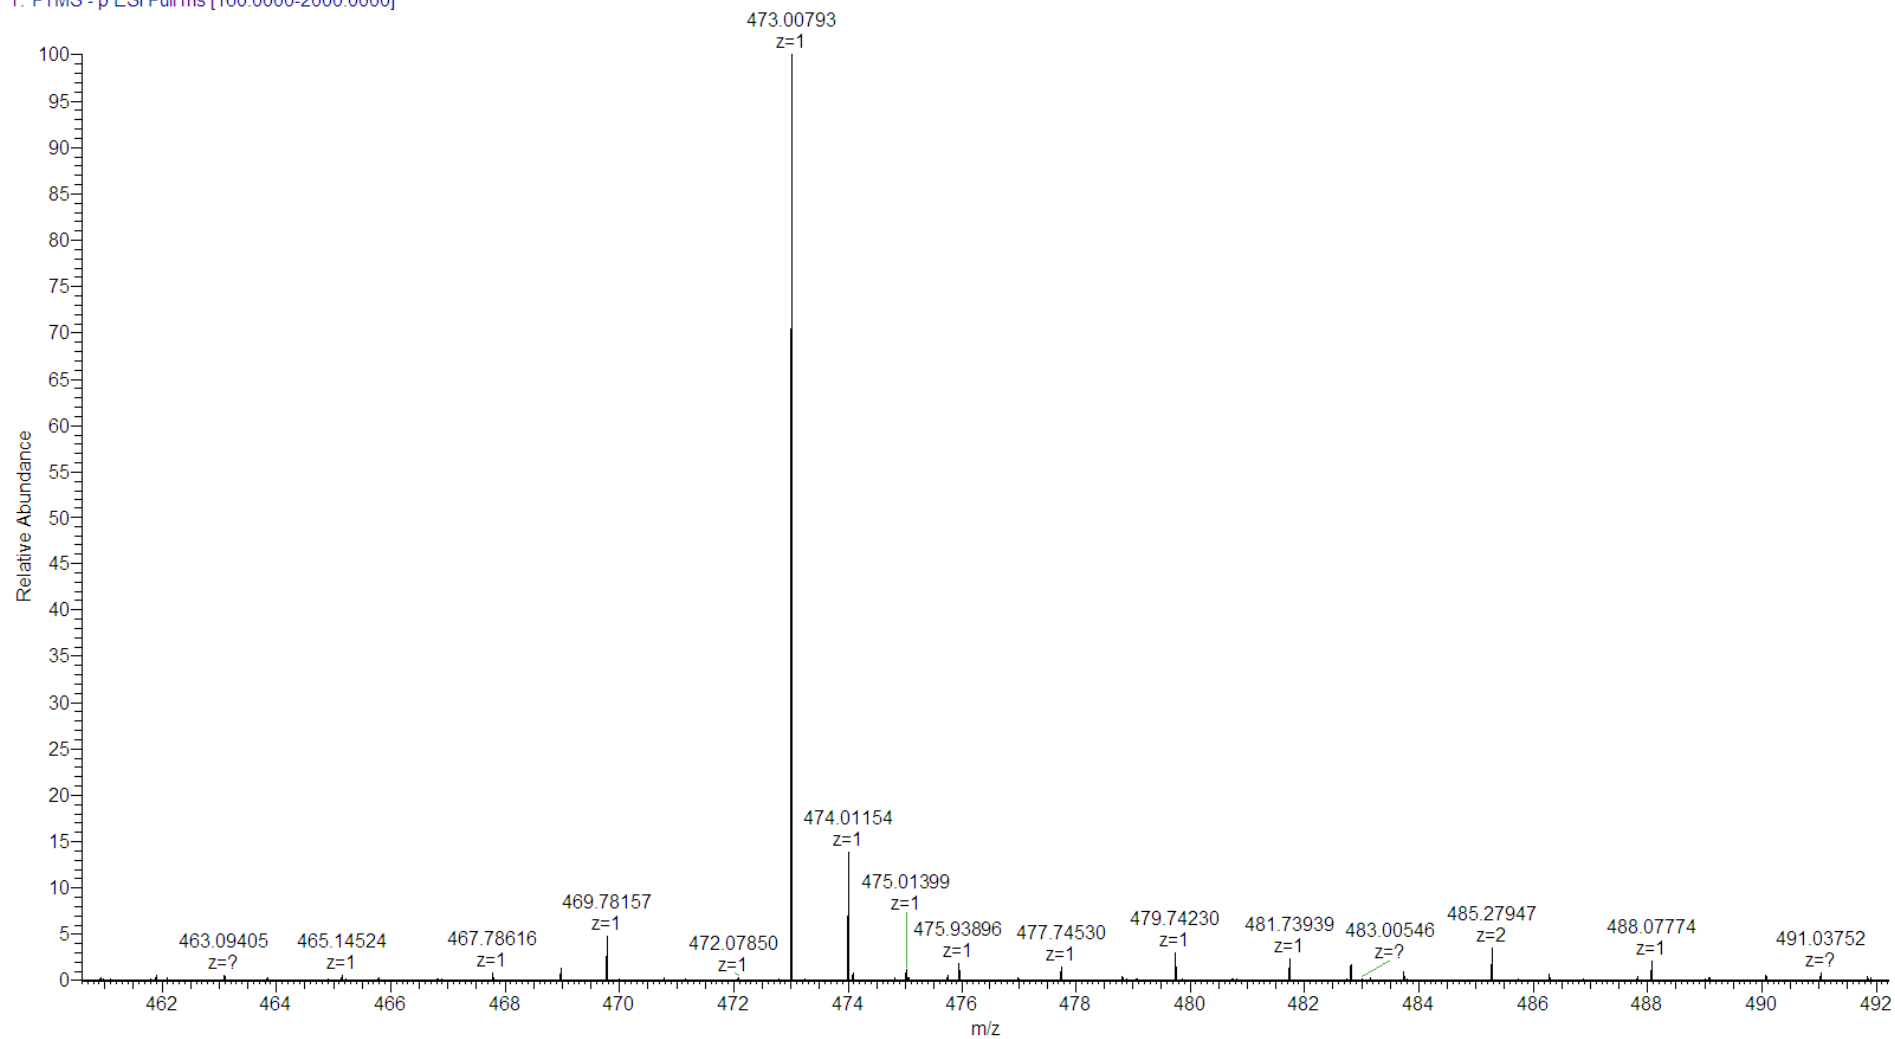

Compound 17: 5'-S-GMP-2'+3'-O-C(O)-NH-C<sub>3</sub>H<sub>3</sub> (NH<sub>4</sub><sup>+</sup> salt)

Chemical structure

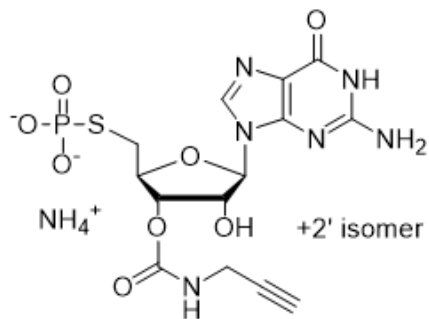

RP-HPLC (conditions c)

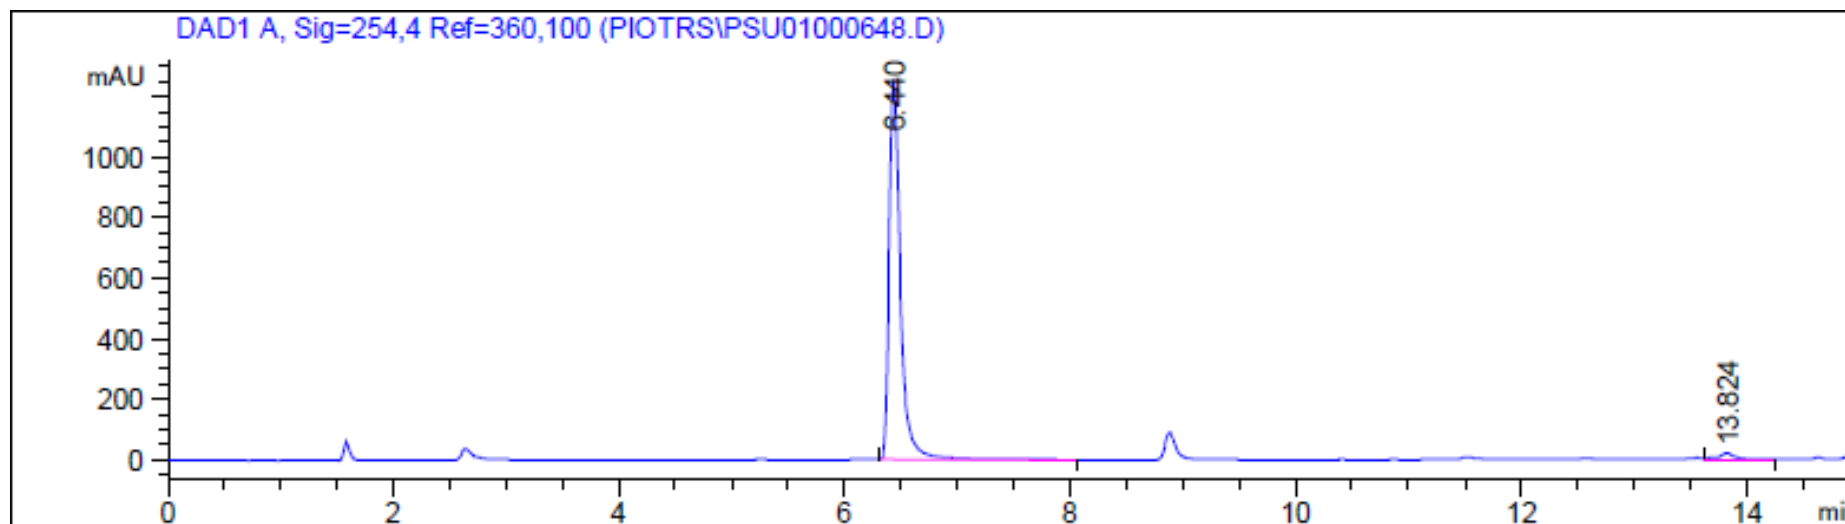

220329\_PSu\_13 #139-210 RT: 1.21-1.83 AV: 72 NL: 7.57E6  
T: FTMS - p ESI Full ms [160.0000-2000.0000]

MS (-) ESI (Calc. [M-H]<sup>-</sup> C<sub>14</sub>H<sub>16</sub>N<sub>6</sub>O<sub>8</sub>PS : 459.0493, found: 459.05005)

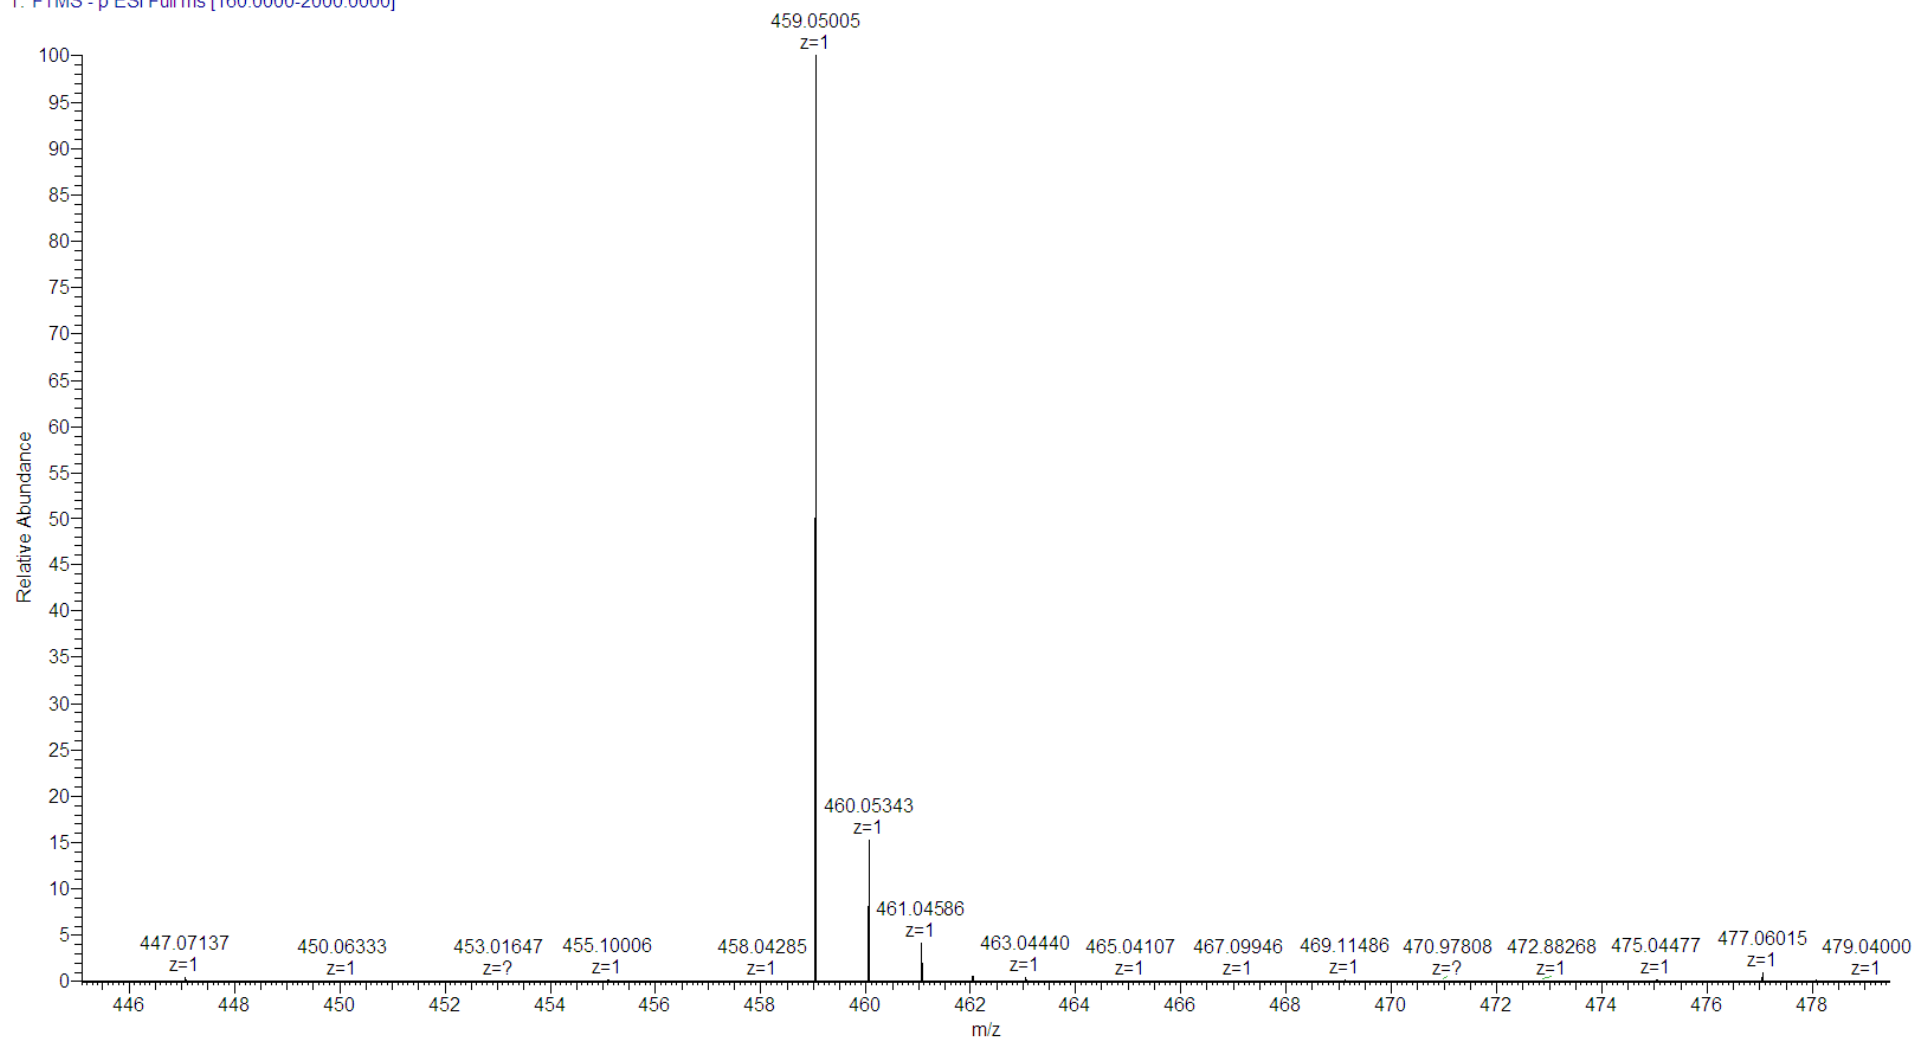

Compound 18: Im-5'-S-GMP-2'+3'-O-C(O)-NH-C<sub>3</sub>H<sub>3</sub> (NH<sub>4</sub><sup>+</sup> salt)

Chemical structure

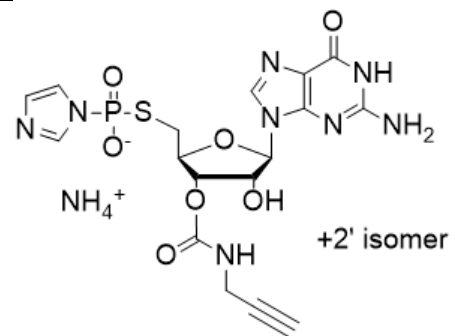

RP-HPLC (conditions c)

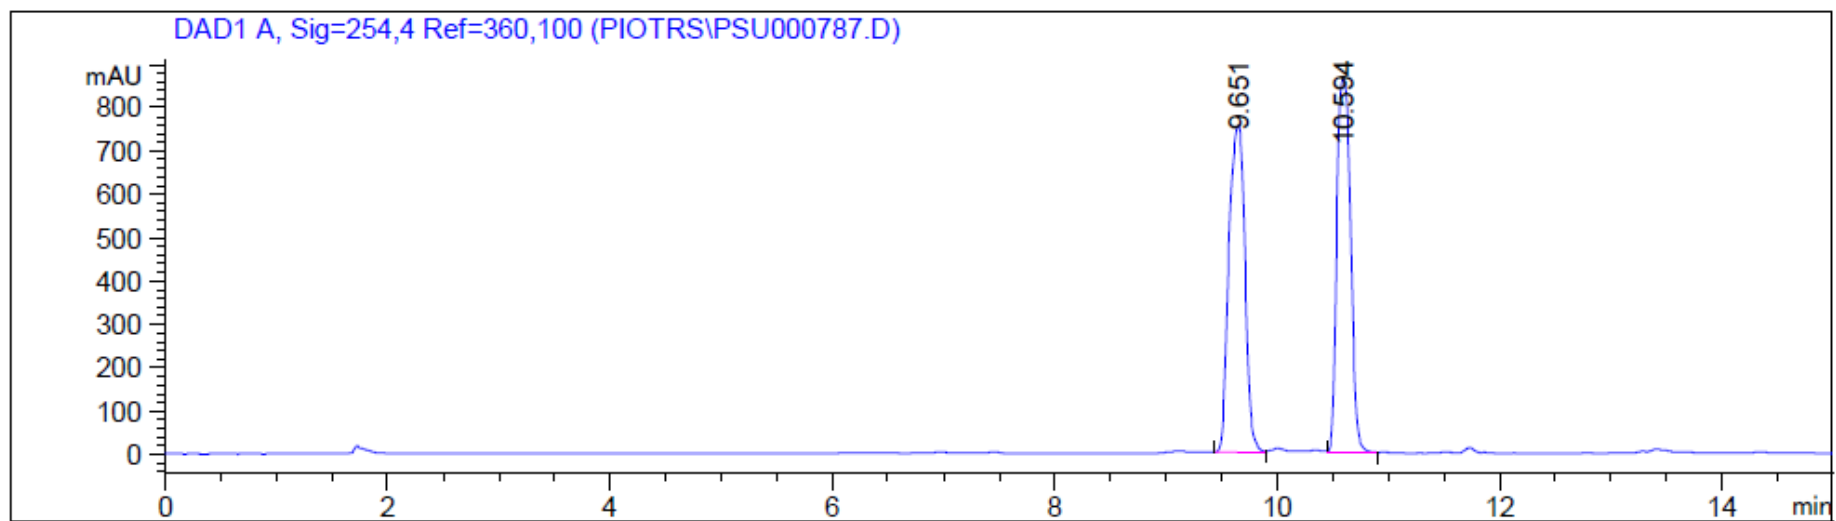

220329\_PSu\_15 #12-60 RT: 0.10-0.52 AV: 49 NL: 4.82E8  
T: FTMS - p ESI Full ms [160.0000-2000.0000]

MS (-) ESI (Calc. [M-H]<sup>-</sup> C<sub>17</sub>H<sub>18</sub>N<sub>8</sub>O<sub>7</sub>PS : 509.0762, found: 509.07638)

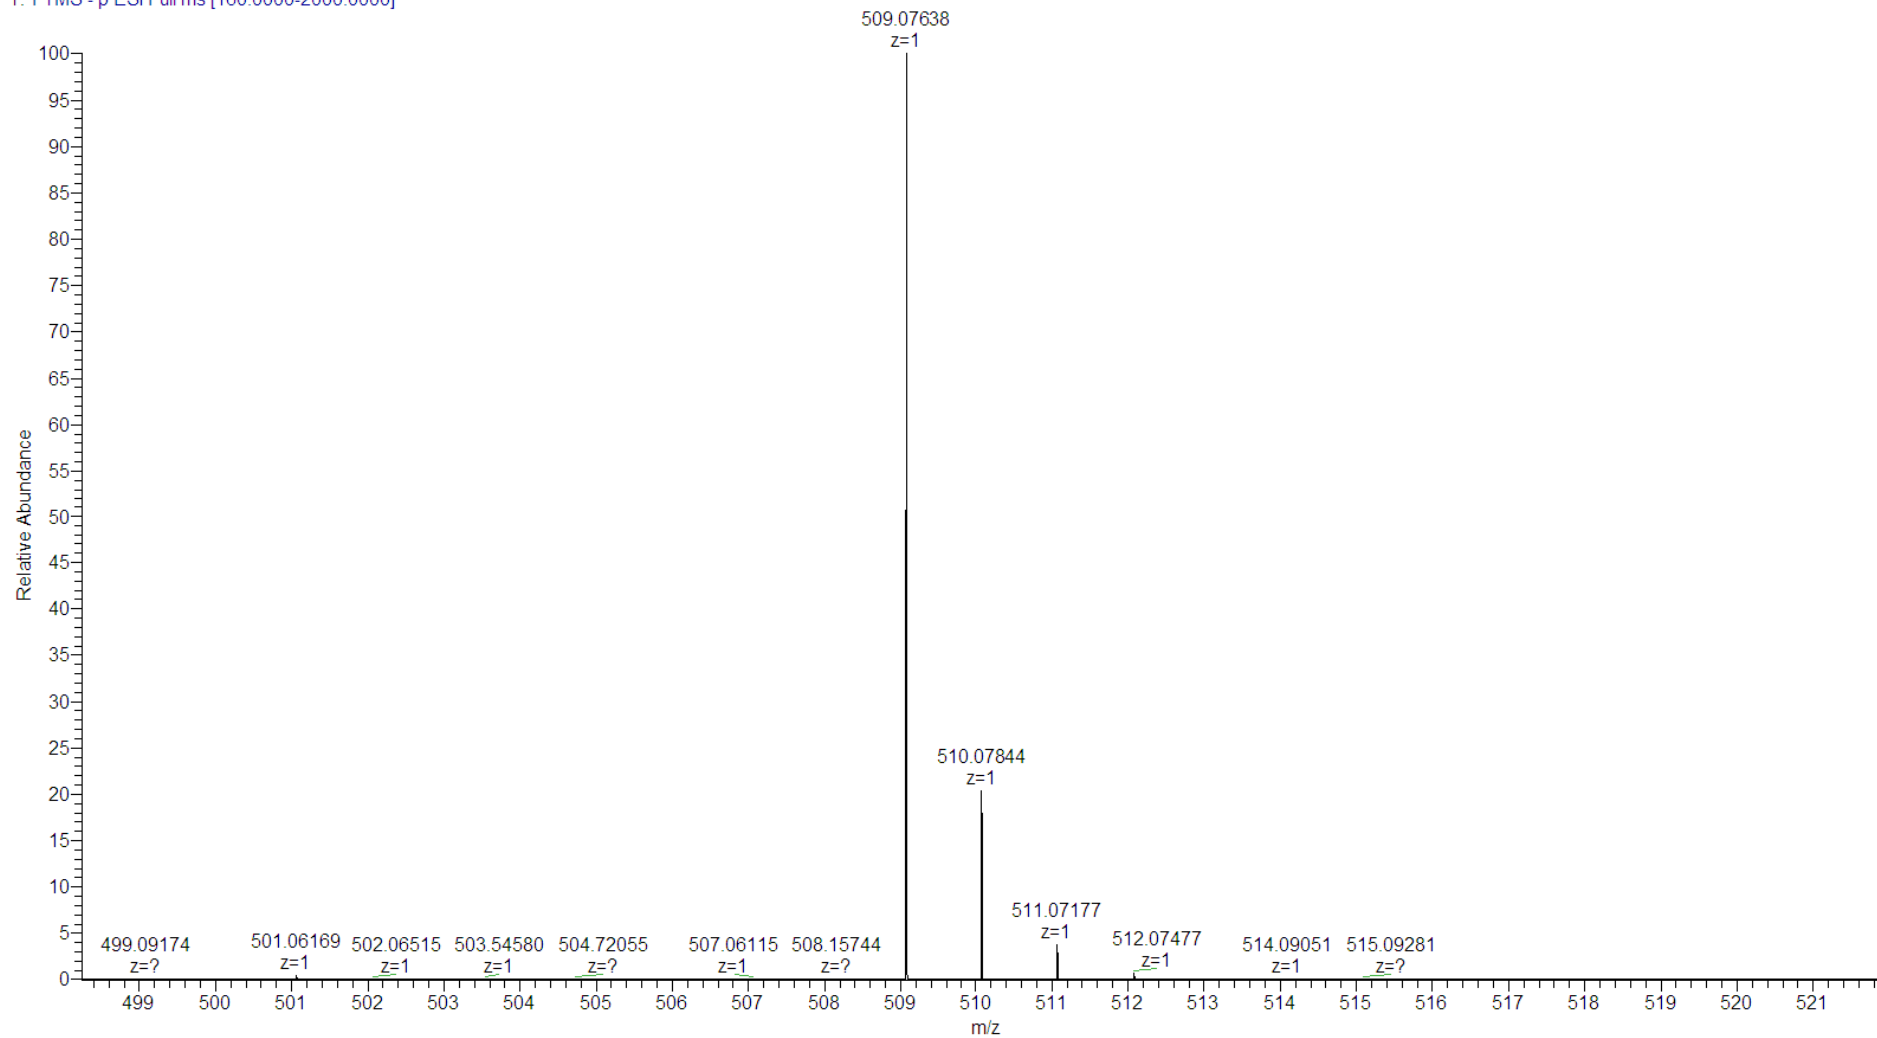



Compound 19: Im-TMGMP-2'+3'-O-C(O)-NH-CH<sub>2</sub>CH<sub>2</sub>-N<sub>3</sub> (NH<sub>4</sub><sup>+</sup> salt)

Chemical structure

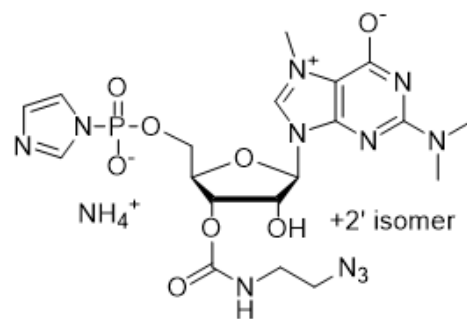

MS (-) ESI (Calc. [M-H]<sup>-</sup> C<sub>19</sub>H<sub>25</sub>N<sub>11</sub>O<sub>8</sub>P<sup>-</sup>; 566.16307, found: 566.16333)

191107\_PSu\_23 #3-102 RT: 0.03-0.98 AV: 100 NL: 5.35E6  
T: FTMS - p ESI Full ms [150.0000-2000.0000]

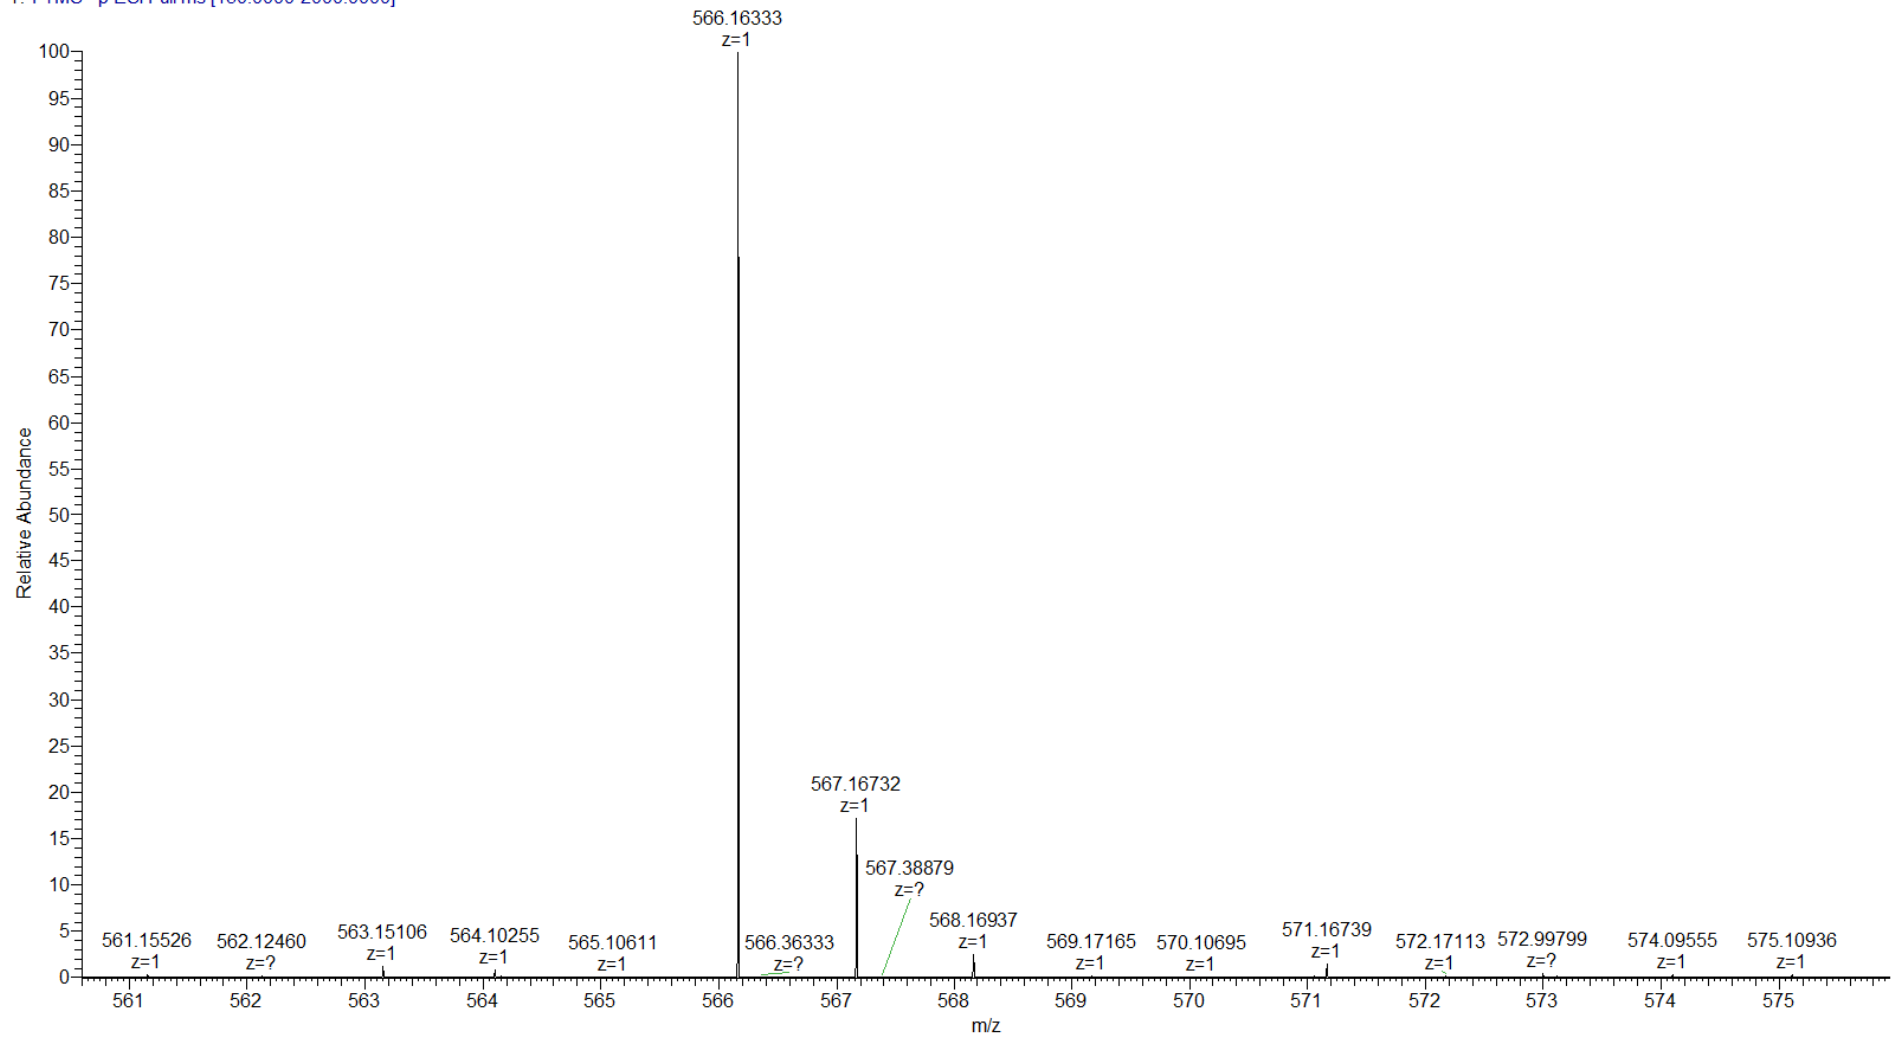

Compound 20: DMHBI-C<sub>3</sub>H<sub>3</sub>

Chemical structure

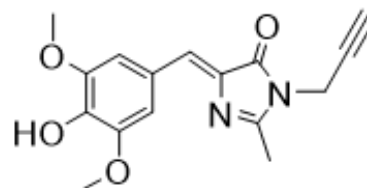

RP-HPLC (conditions c)

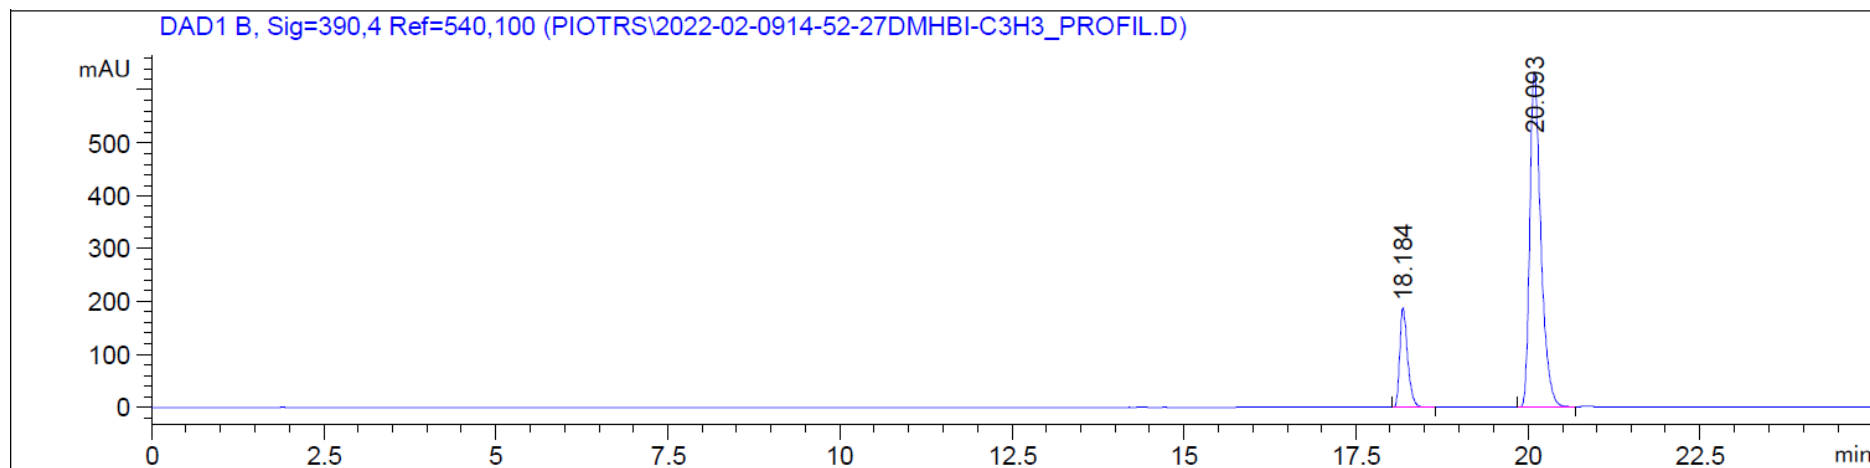

MS (-) ESI (Calc.  $[M-H]^-$   $C_{16}H_{17}N_2O_4^+$  : 301.1183, found: 301.11826)

90218\_VIII\_BW\_86 #31-129 RT: 0.30-1.23 AV: 99 NL: 1.09E8  
T: FTMS + p ESI Full ms [120.0000-1500.0000]

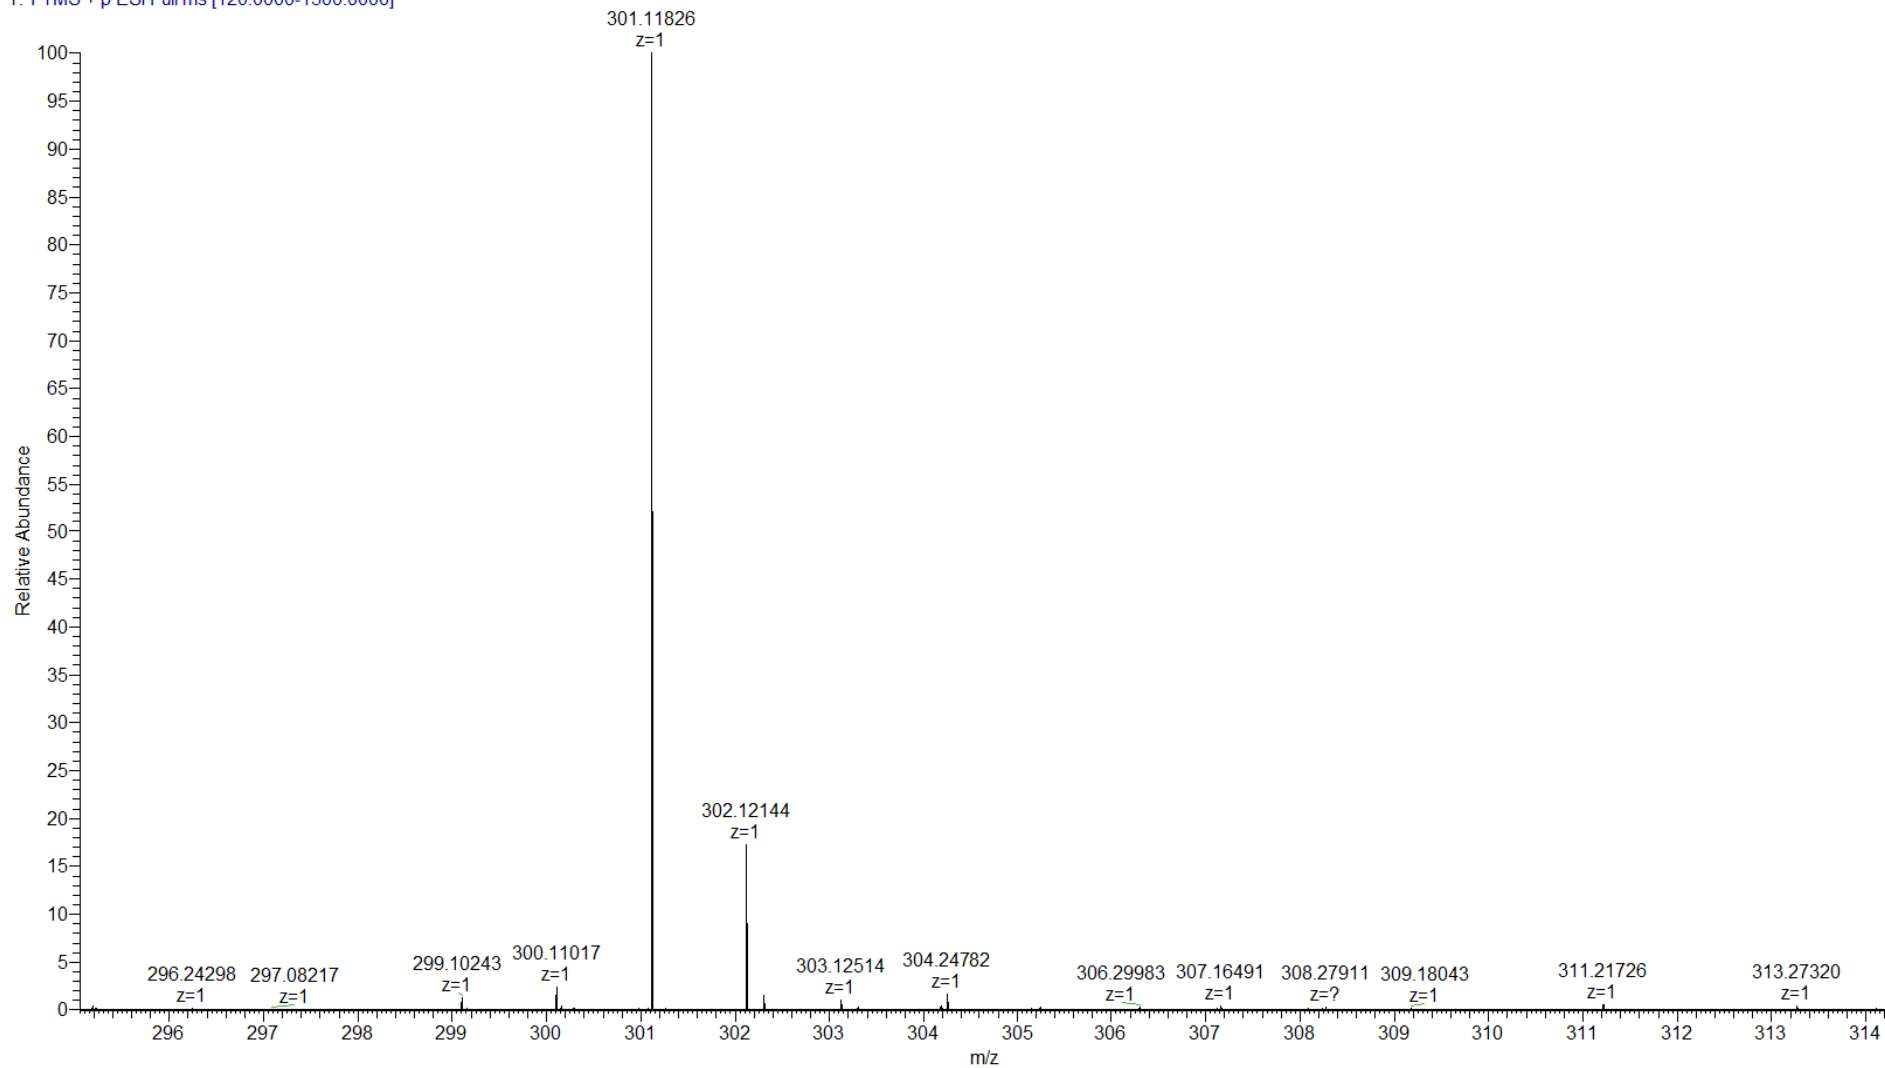

<sup>1</sup>H NMR (500 MHz, DMSO-d<sub>6</sub>, 25°C)

20190128\_BW\_VII-BW-86.10.fid

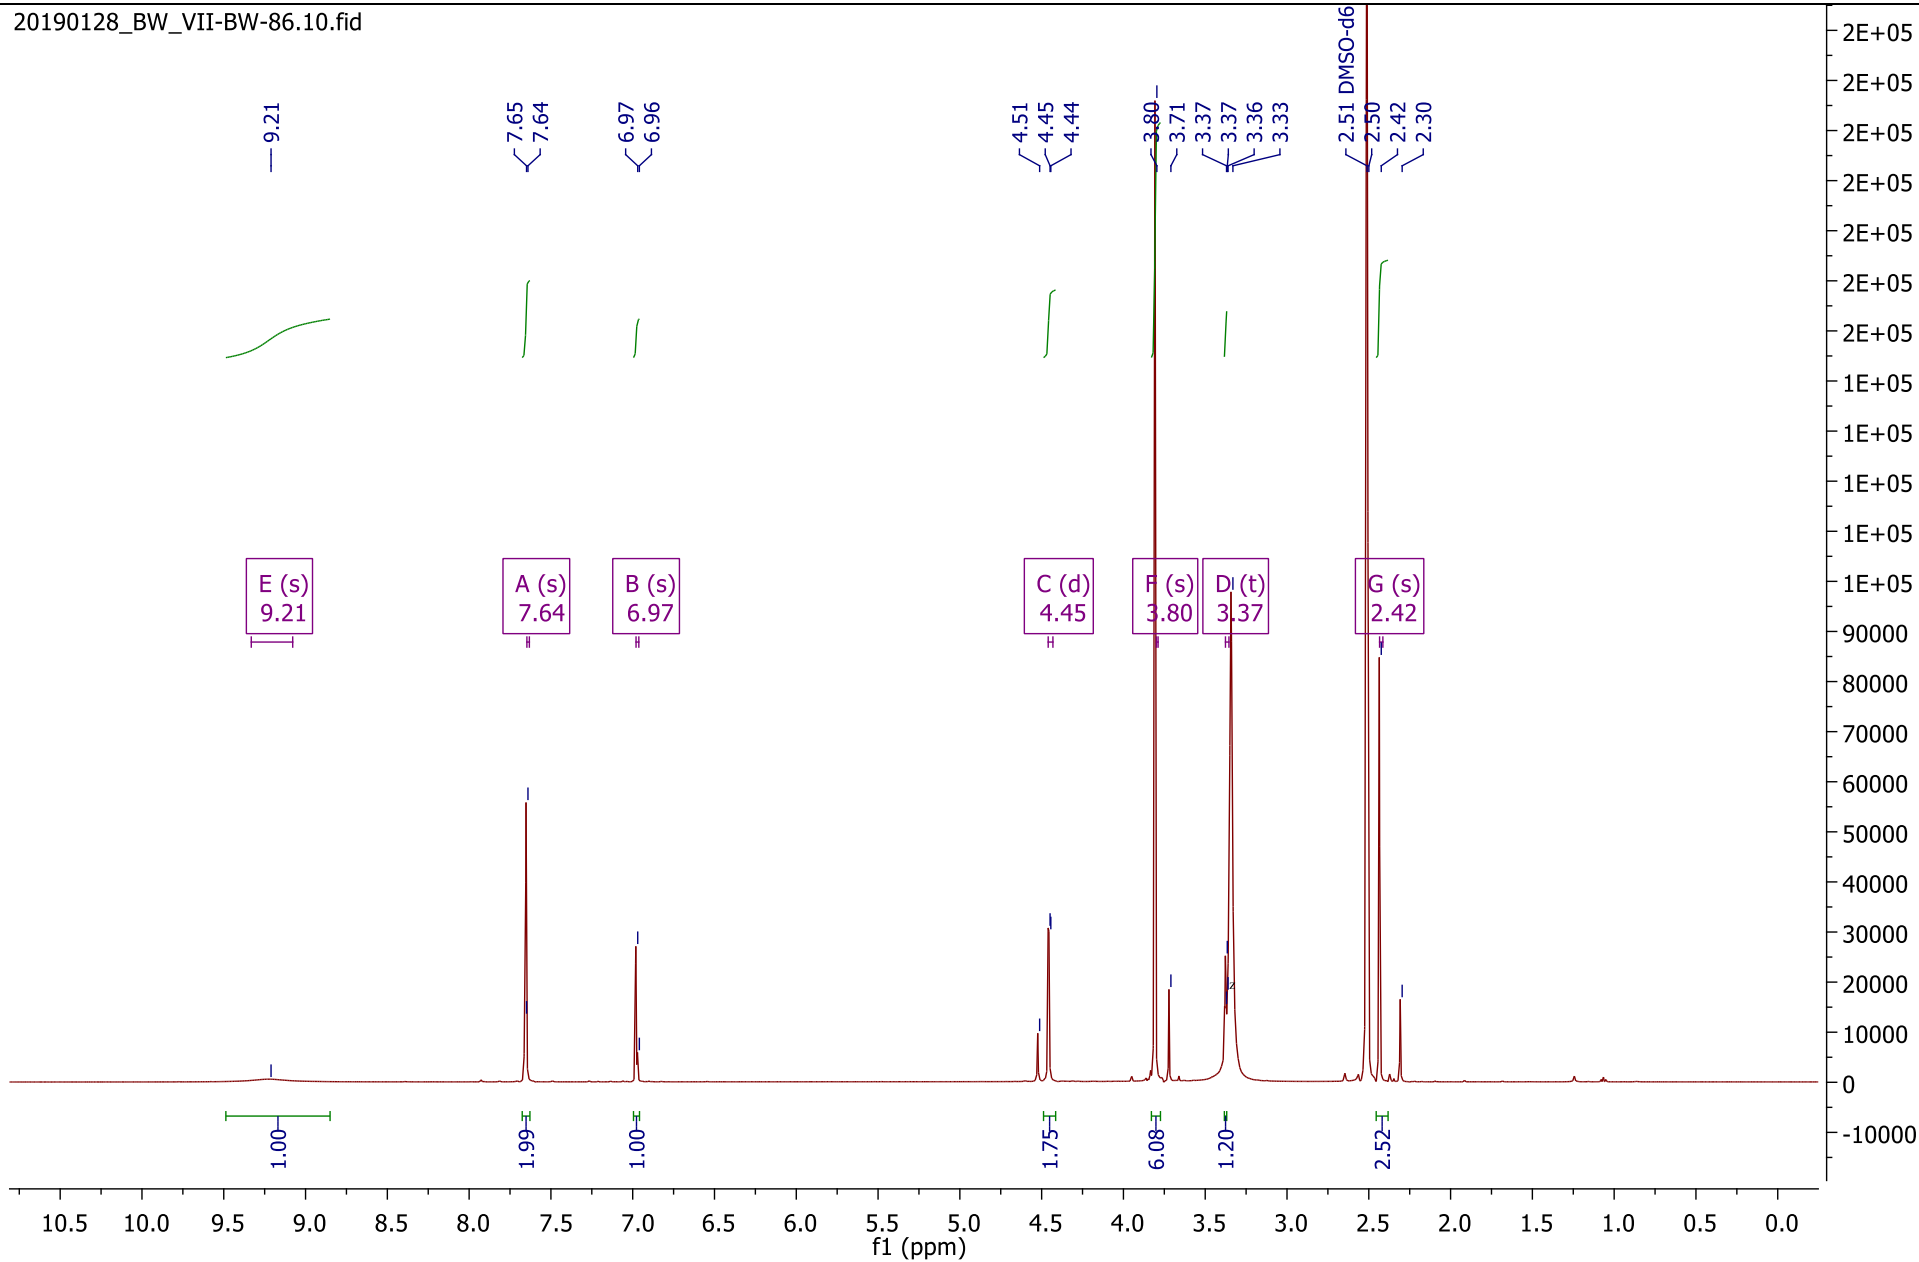

COSY NMR

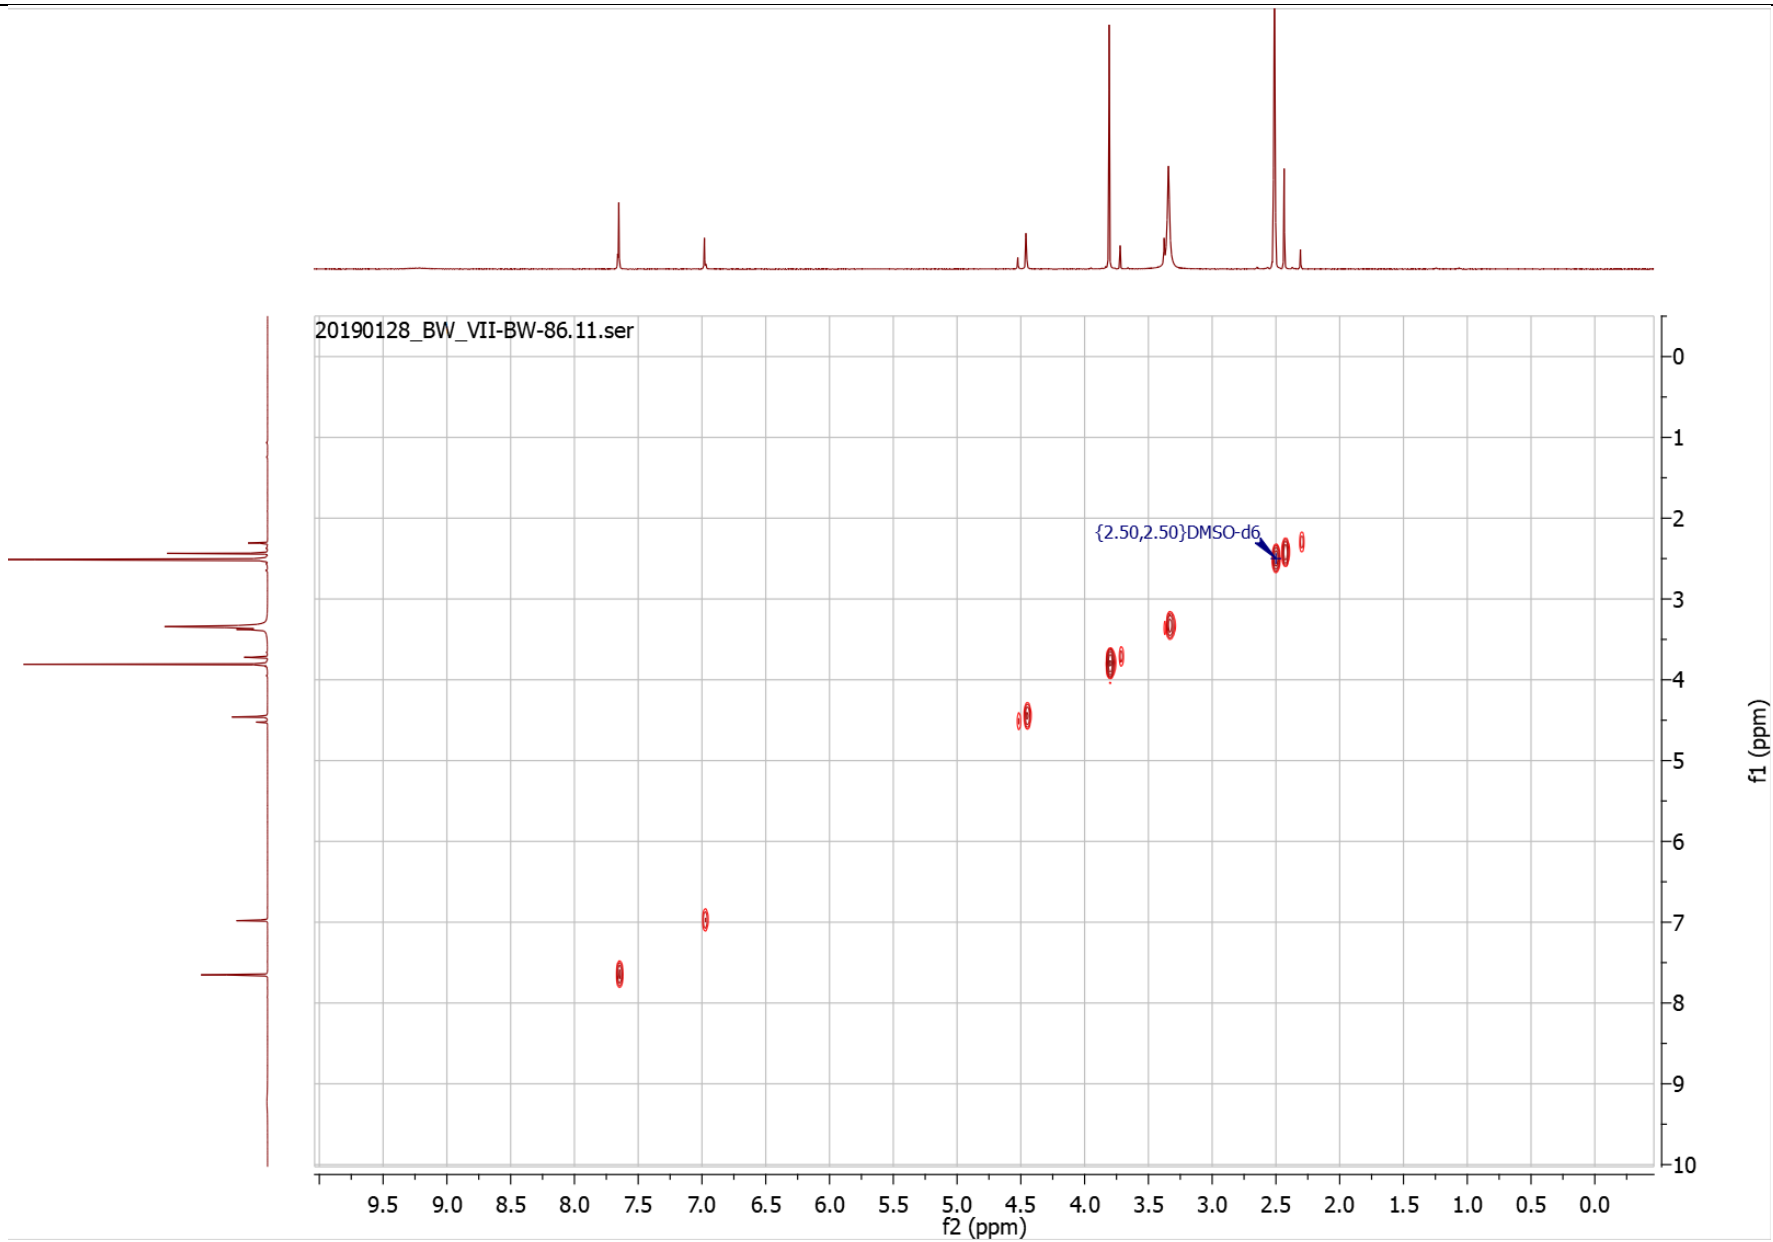

Compound 21: oHBI-C<sub>3</sub>H<sub>3</sub>

Chemical structure

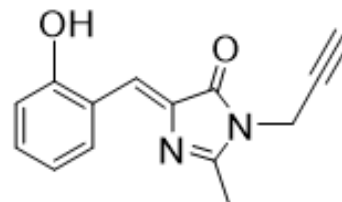

RP-HPLC (conditions b)

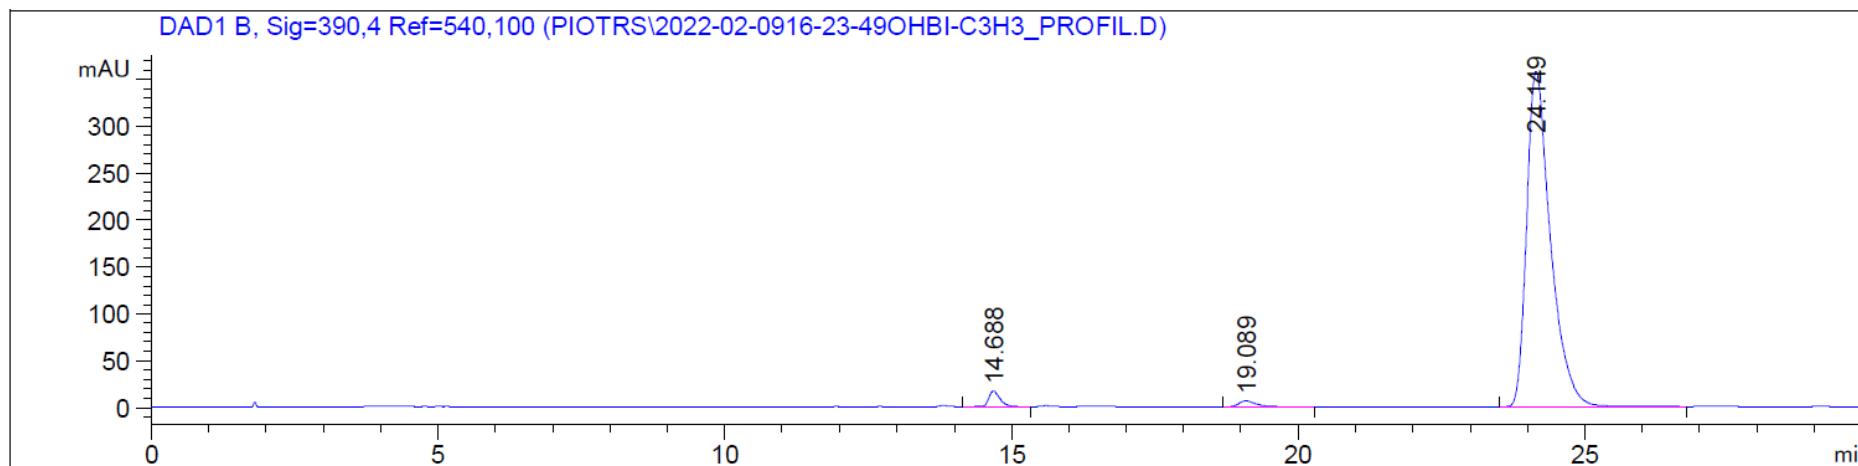

220214\_PSu\_23 #30-108 RT: 0.27-0.95 AV: 79 NL: 1.54E8  
T: FTMS + p ESI Full ms [160.0000-2000.0000]

MS (+) ESI (Calc.  $[M+H]^+ C_{14}H_{13}N_2O_2^+$ : 241.09715, found : 241.09680)

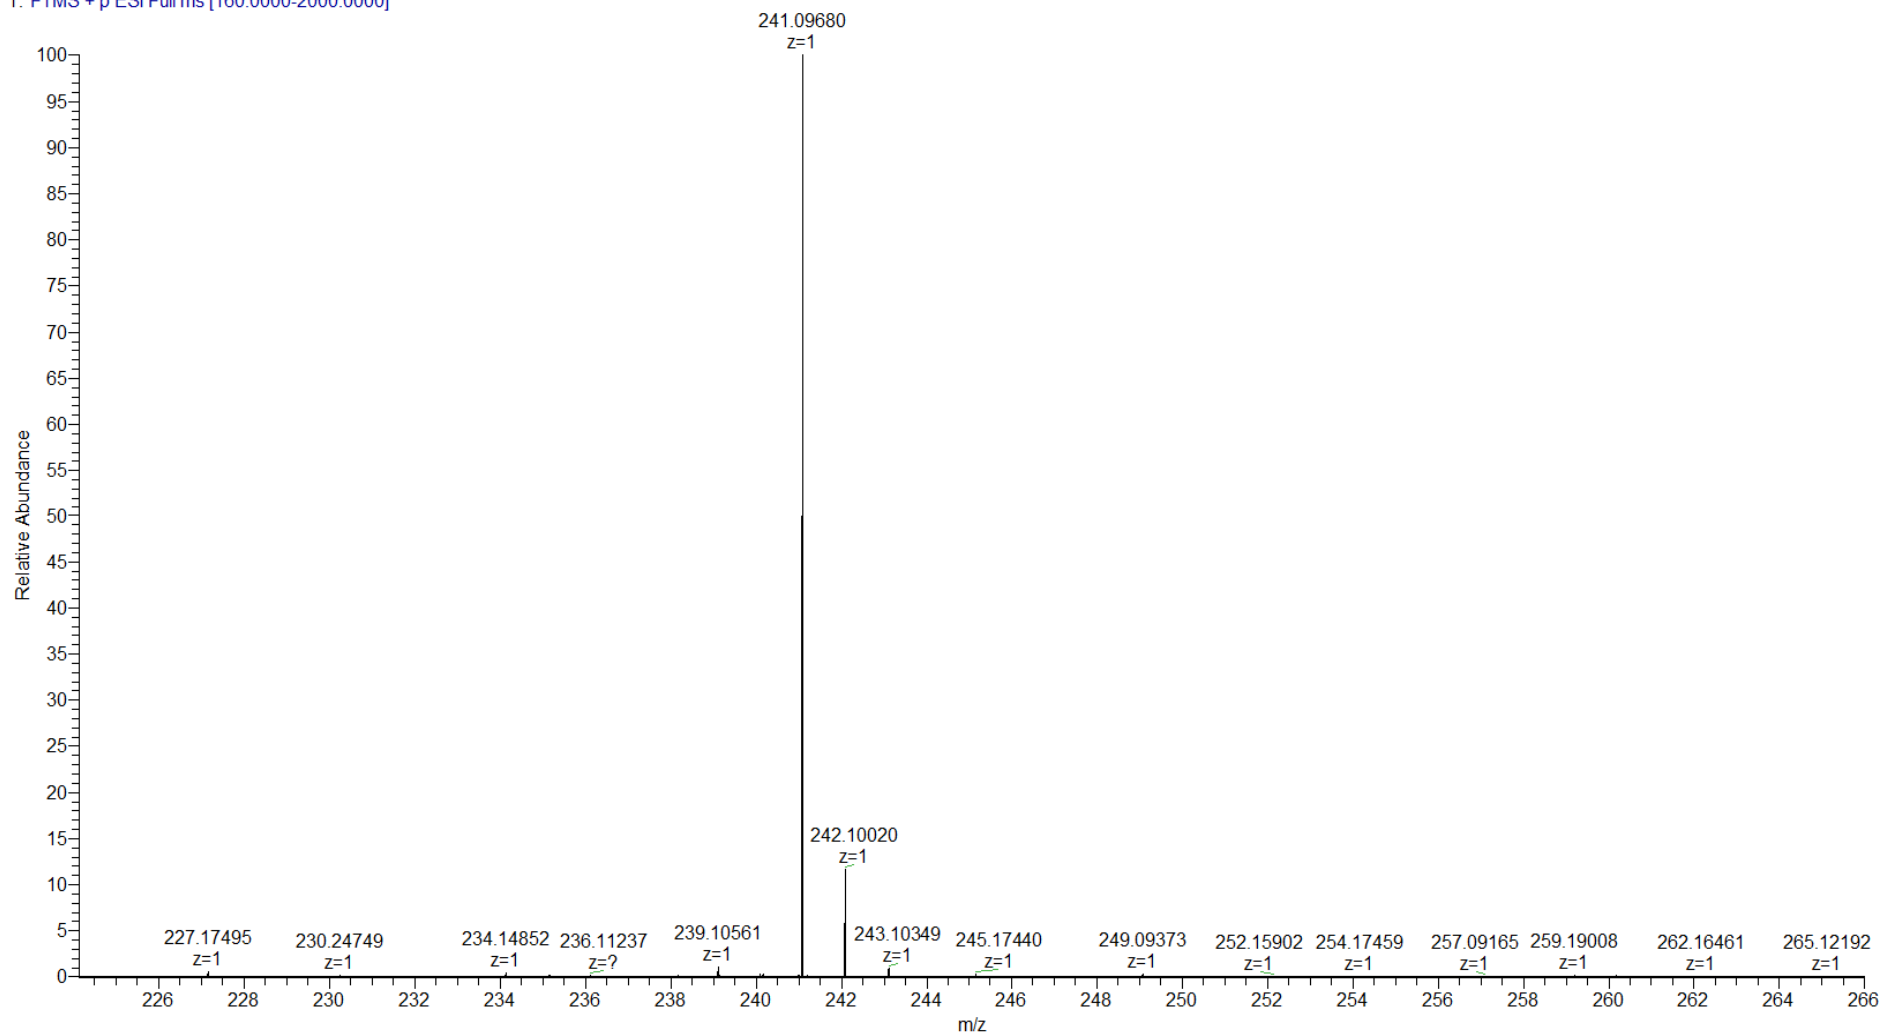



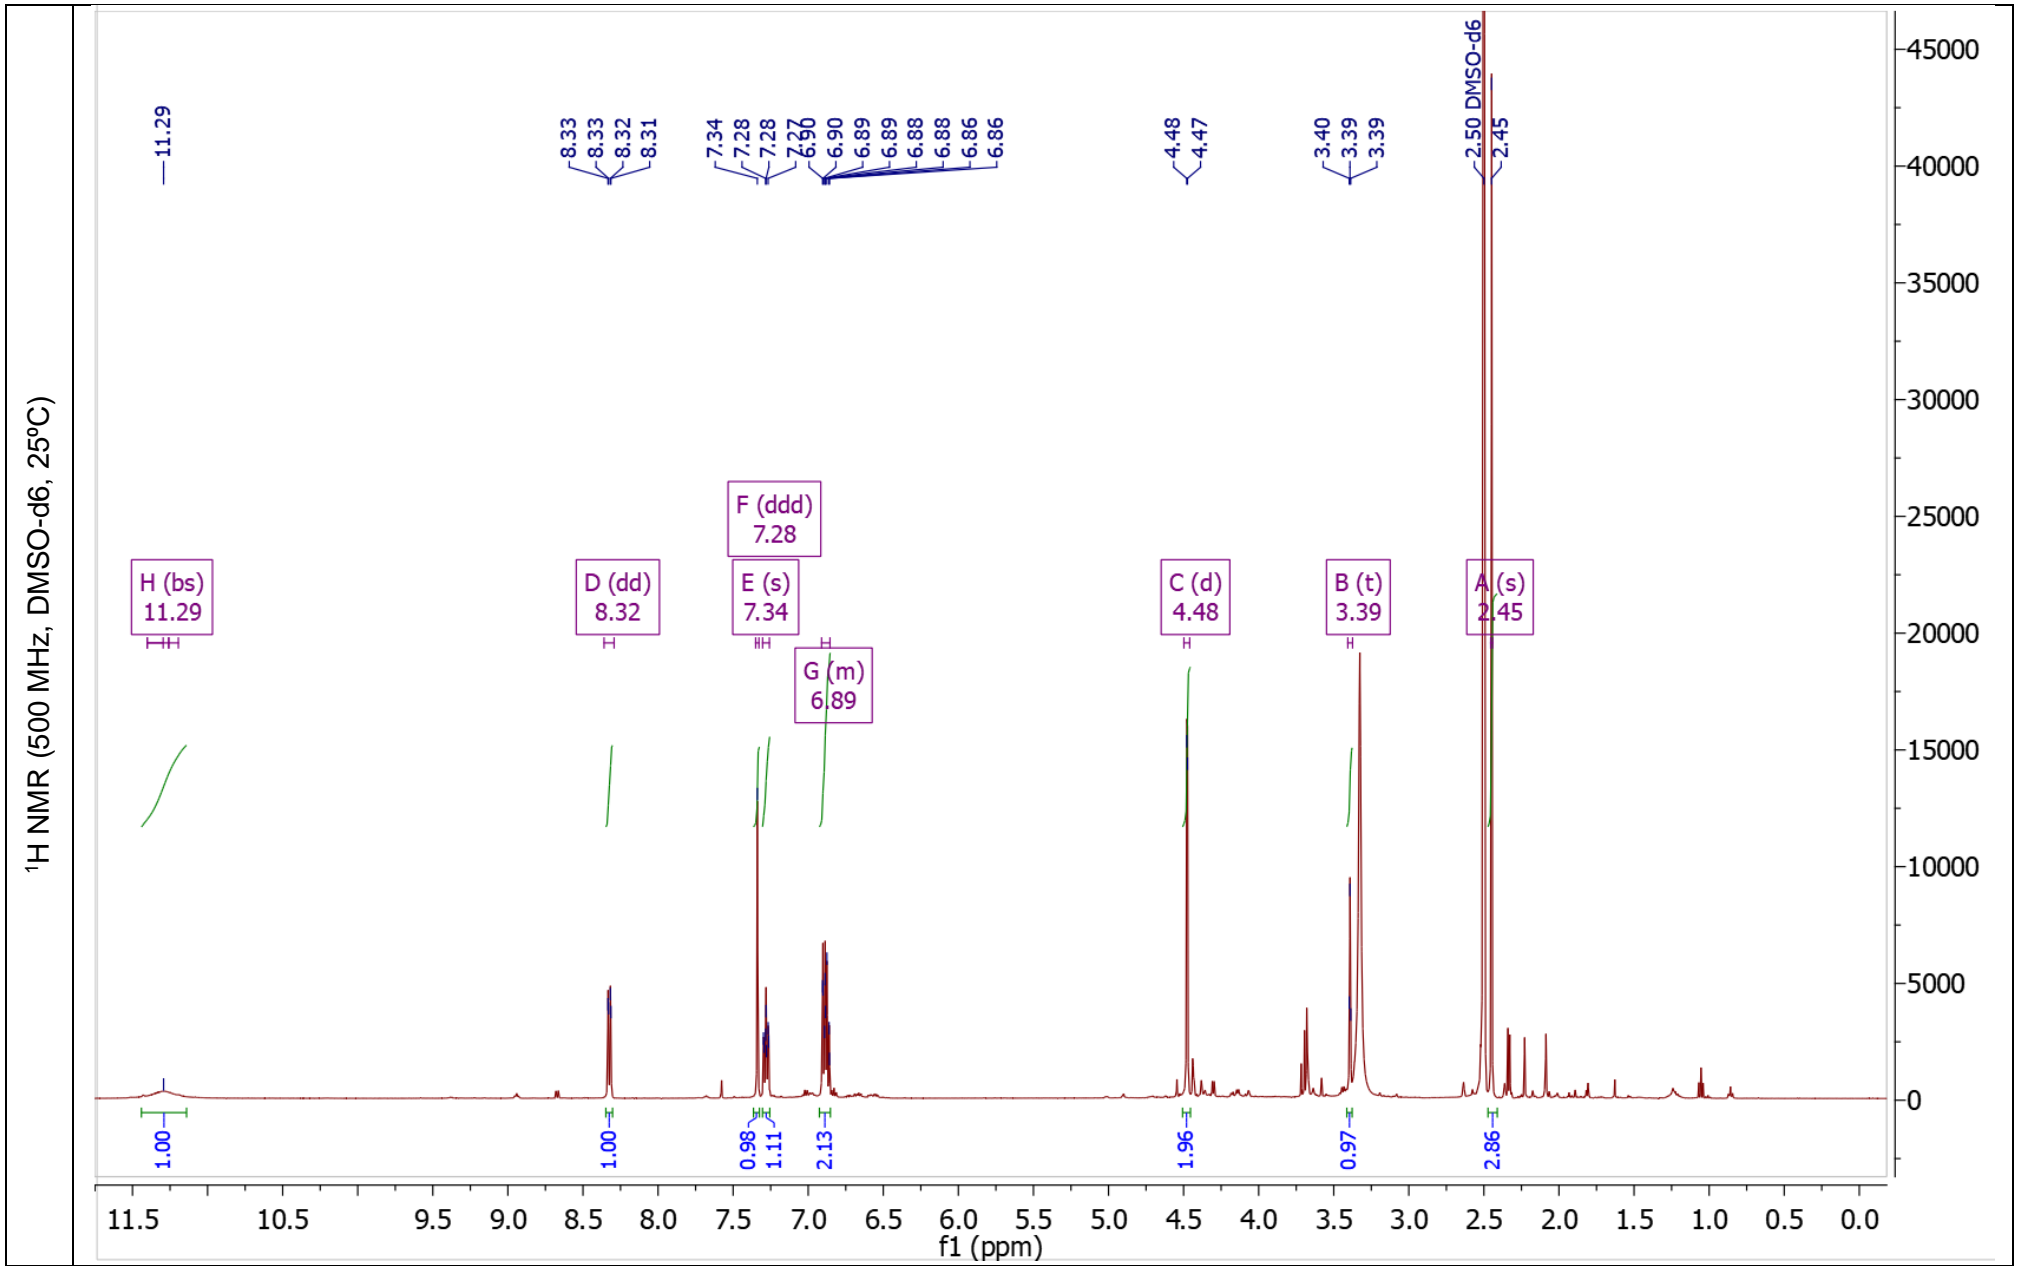

COSY NMR

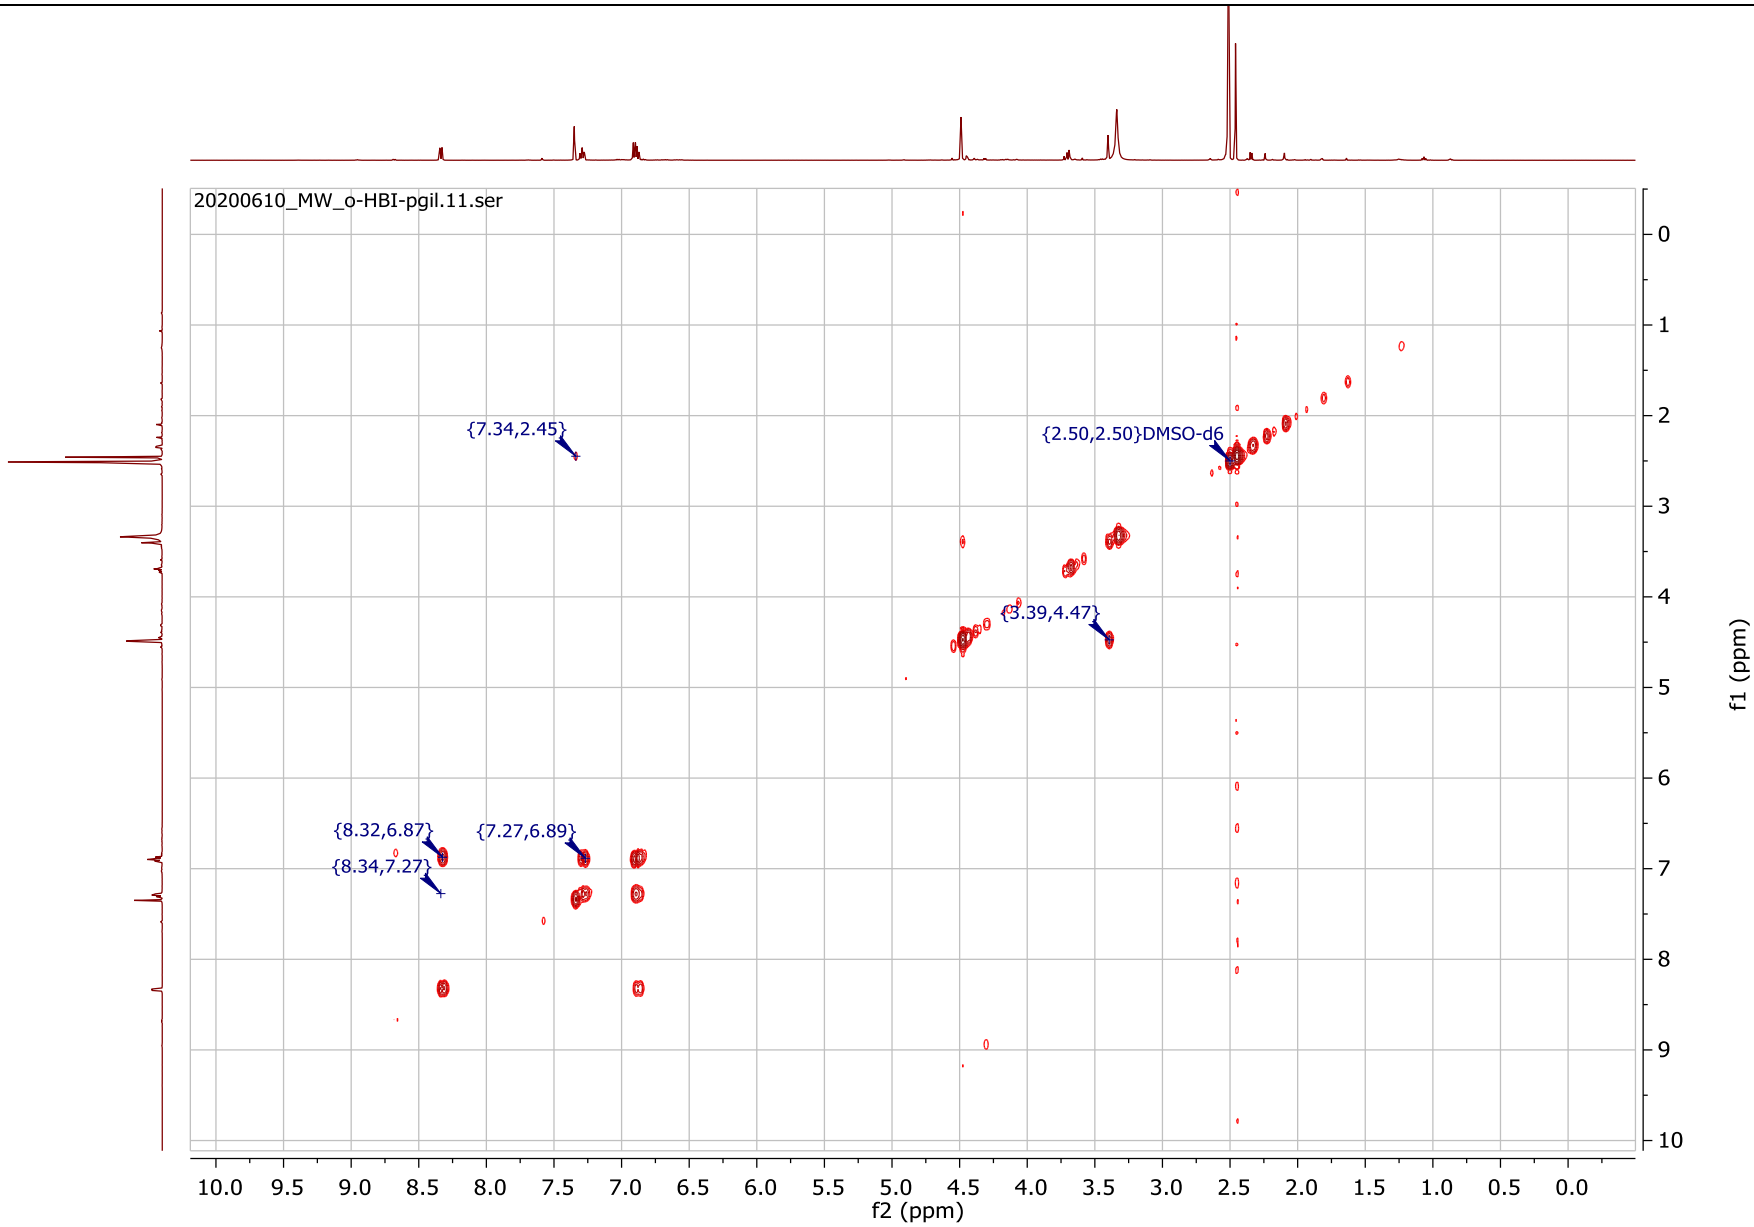

<sup>13</sup>C NMR (500 MHz, D<sub>2</sub>O, 25°C)

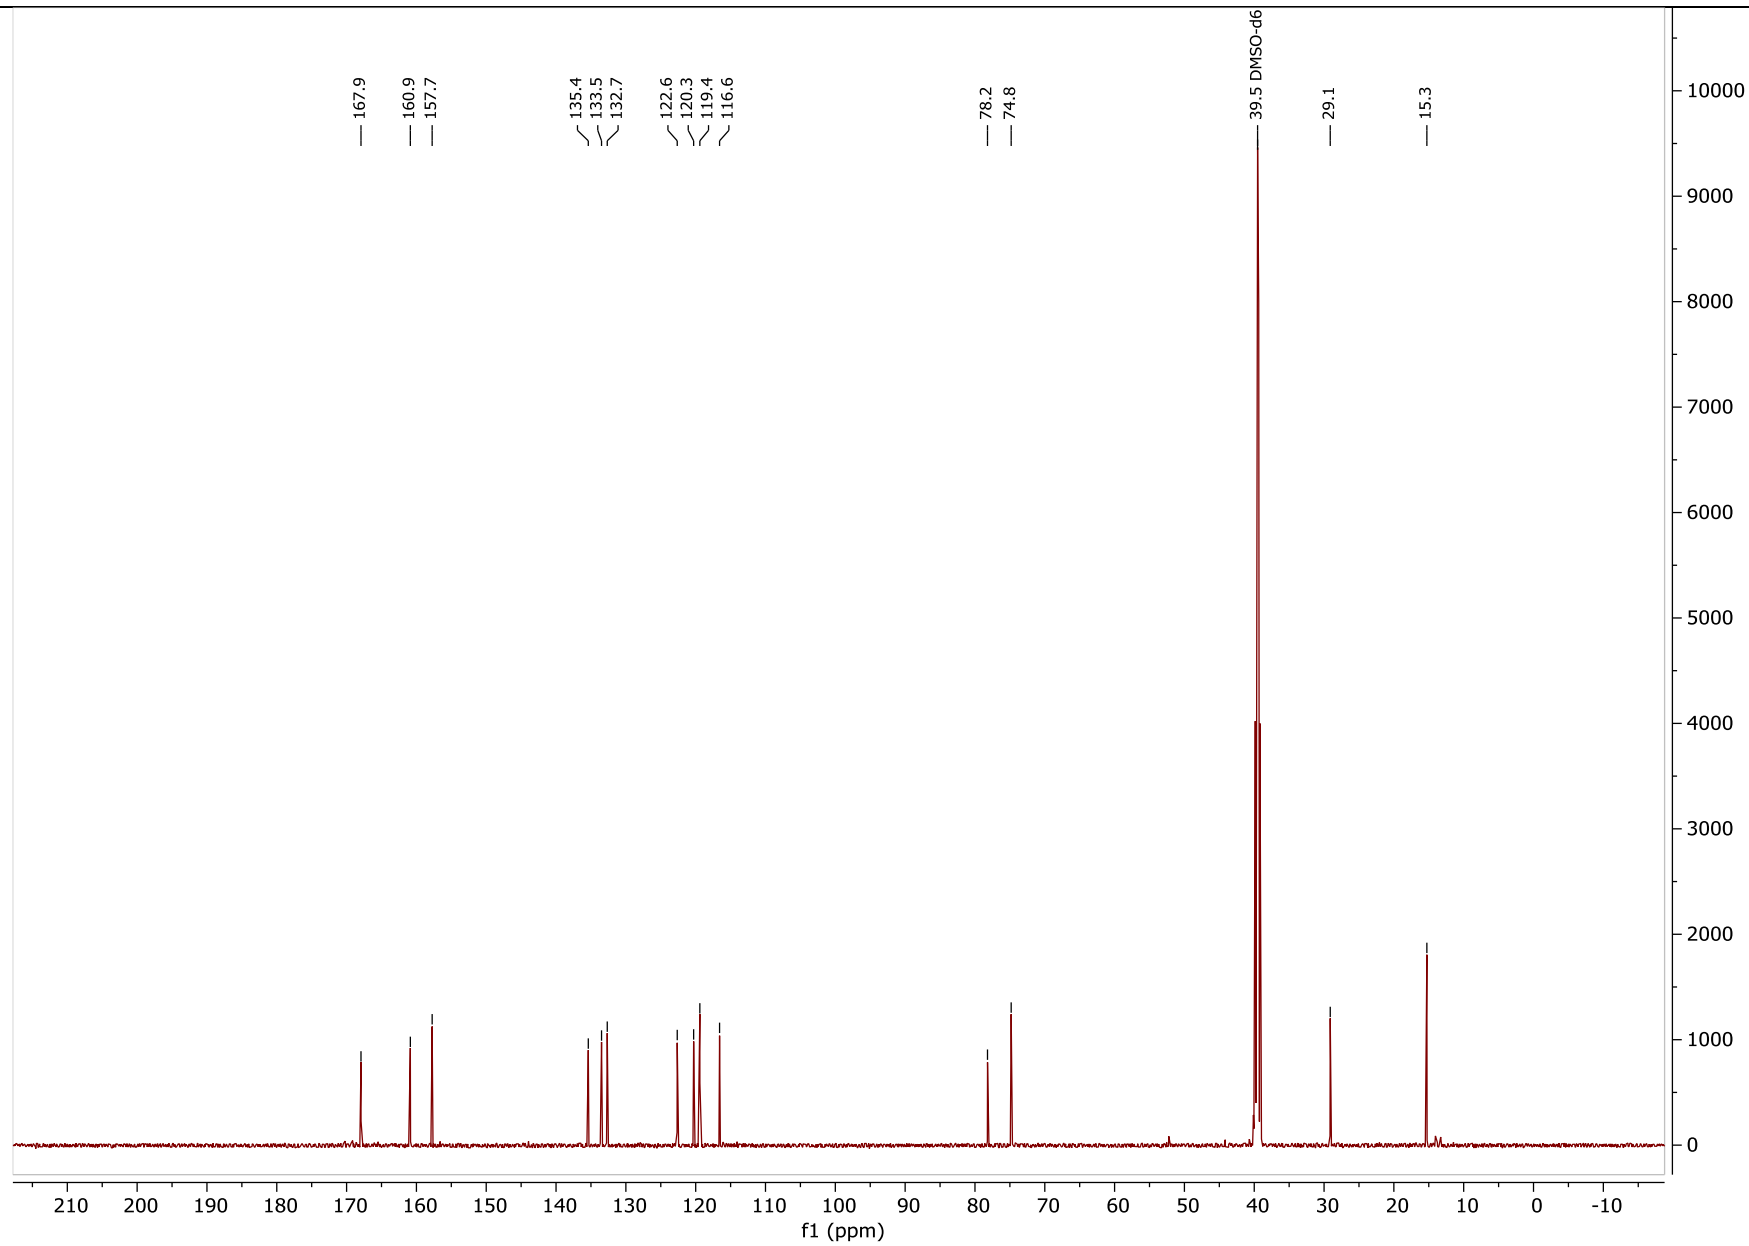

HSQC NMR

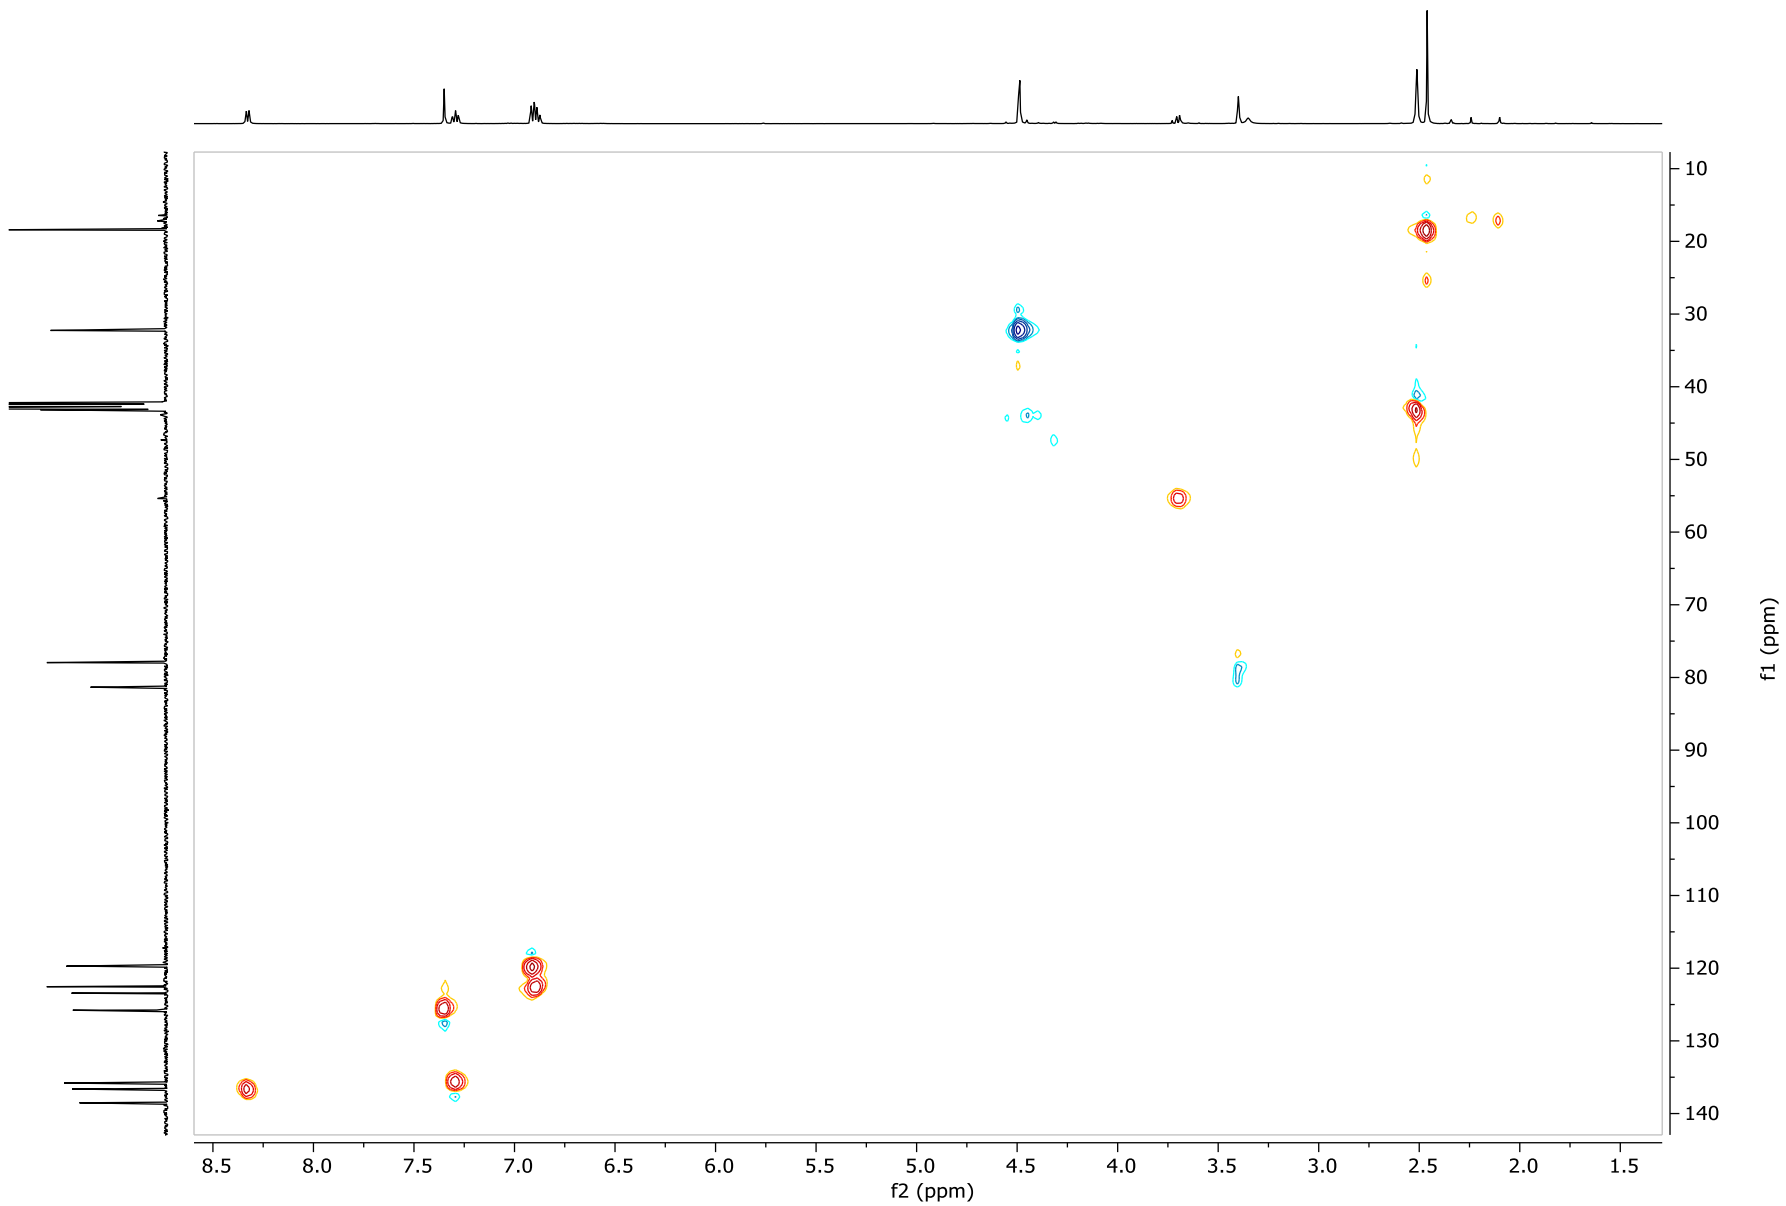

Compound 22: HEMABI-C<sub>3</sub>H<sub>3</sub>

Chemical structure

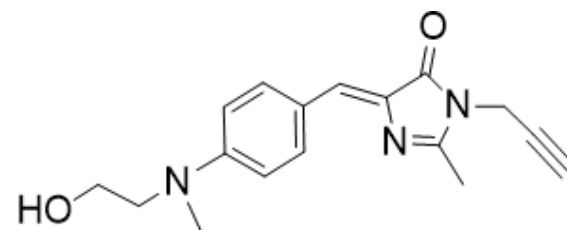

RP-HPLC (conditions c)

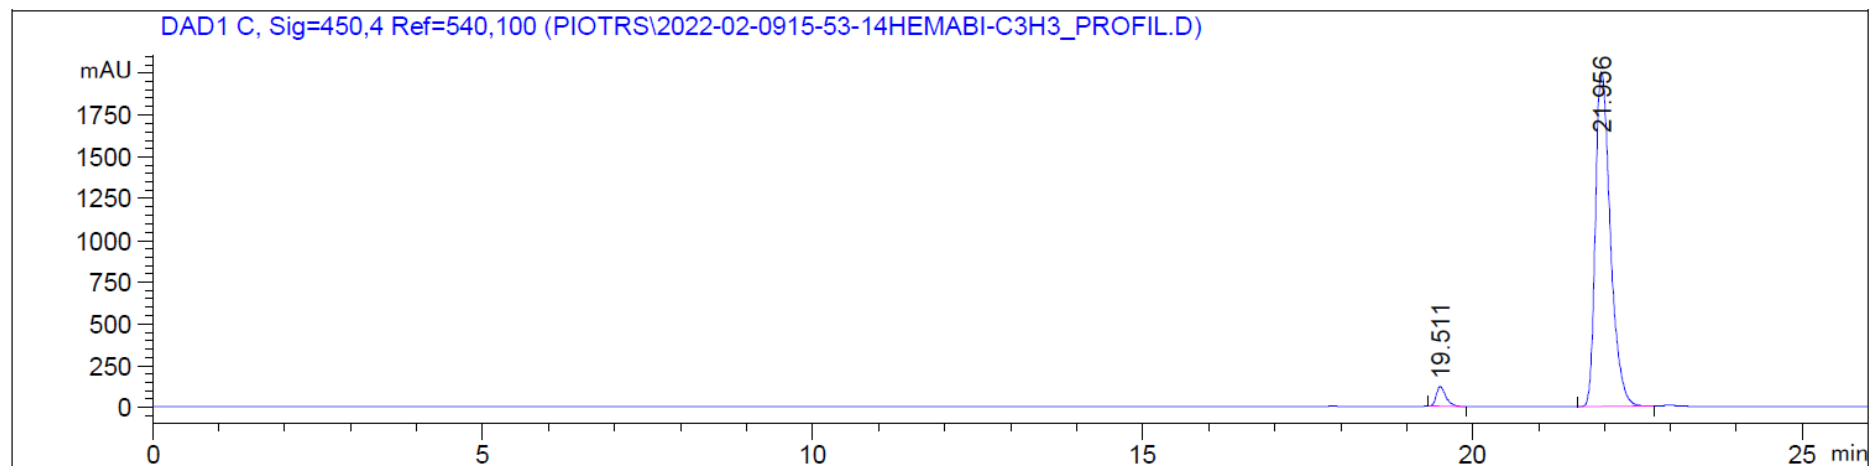

220214\_PSu\_24 #71-106 RT: 0.62-0.93 AV: 36 NL: 7.72E8  
T: FTMS + p ESI Full ms [160.0000-2000.0000]

MS (+) ESI (Calc. [M+H]<sup>+</sup> C<sub>17</sub>H<sub>20</sub>N<sub>3</sub>O<sub>2</sub><sup>+</sup>: 298.1550, found : 298.15492)

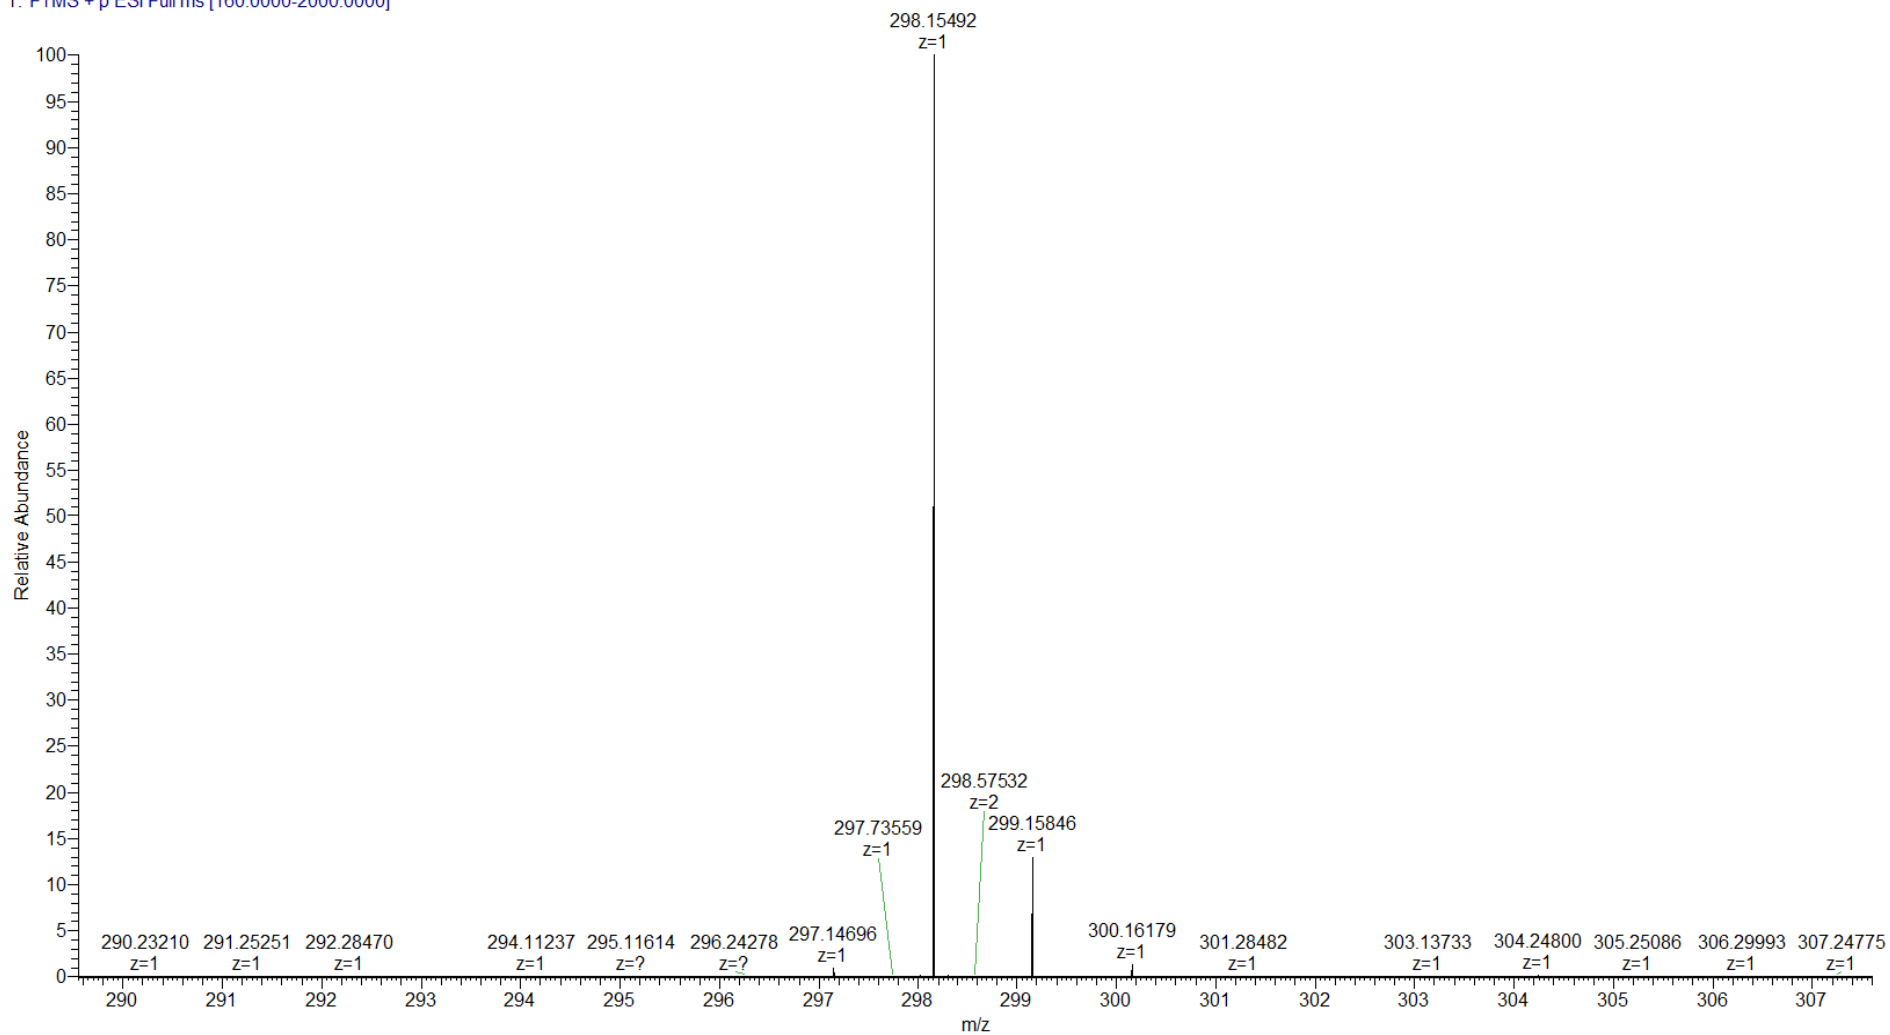

<sup>1</sup>H NMR (500 MHz, DMSO-d<sub>6</sub>, 25°C)

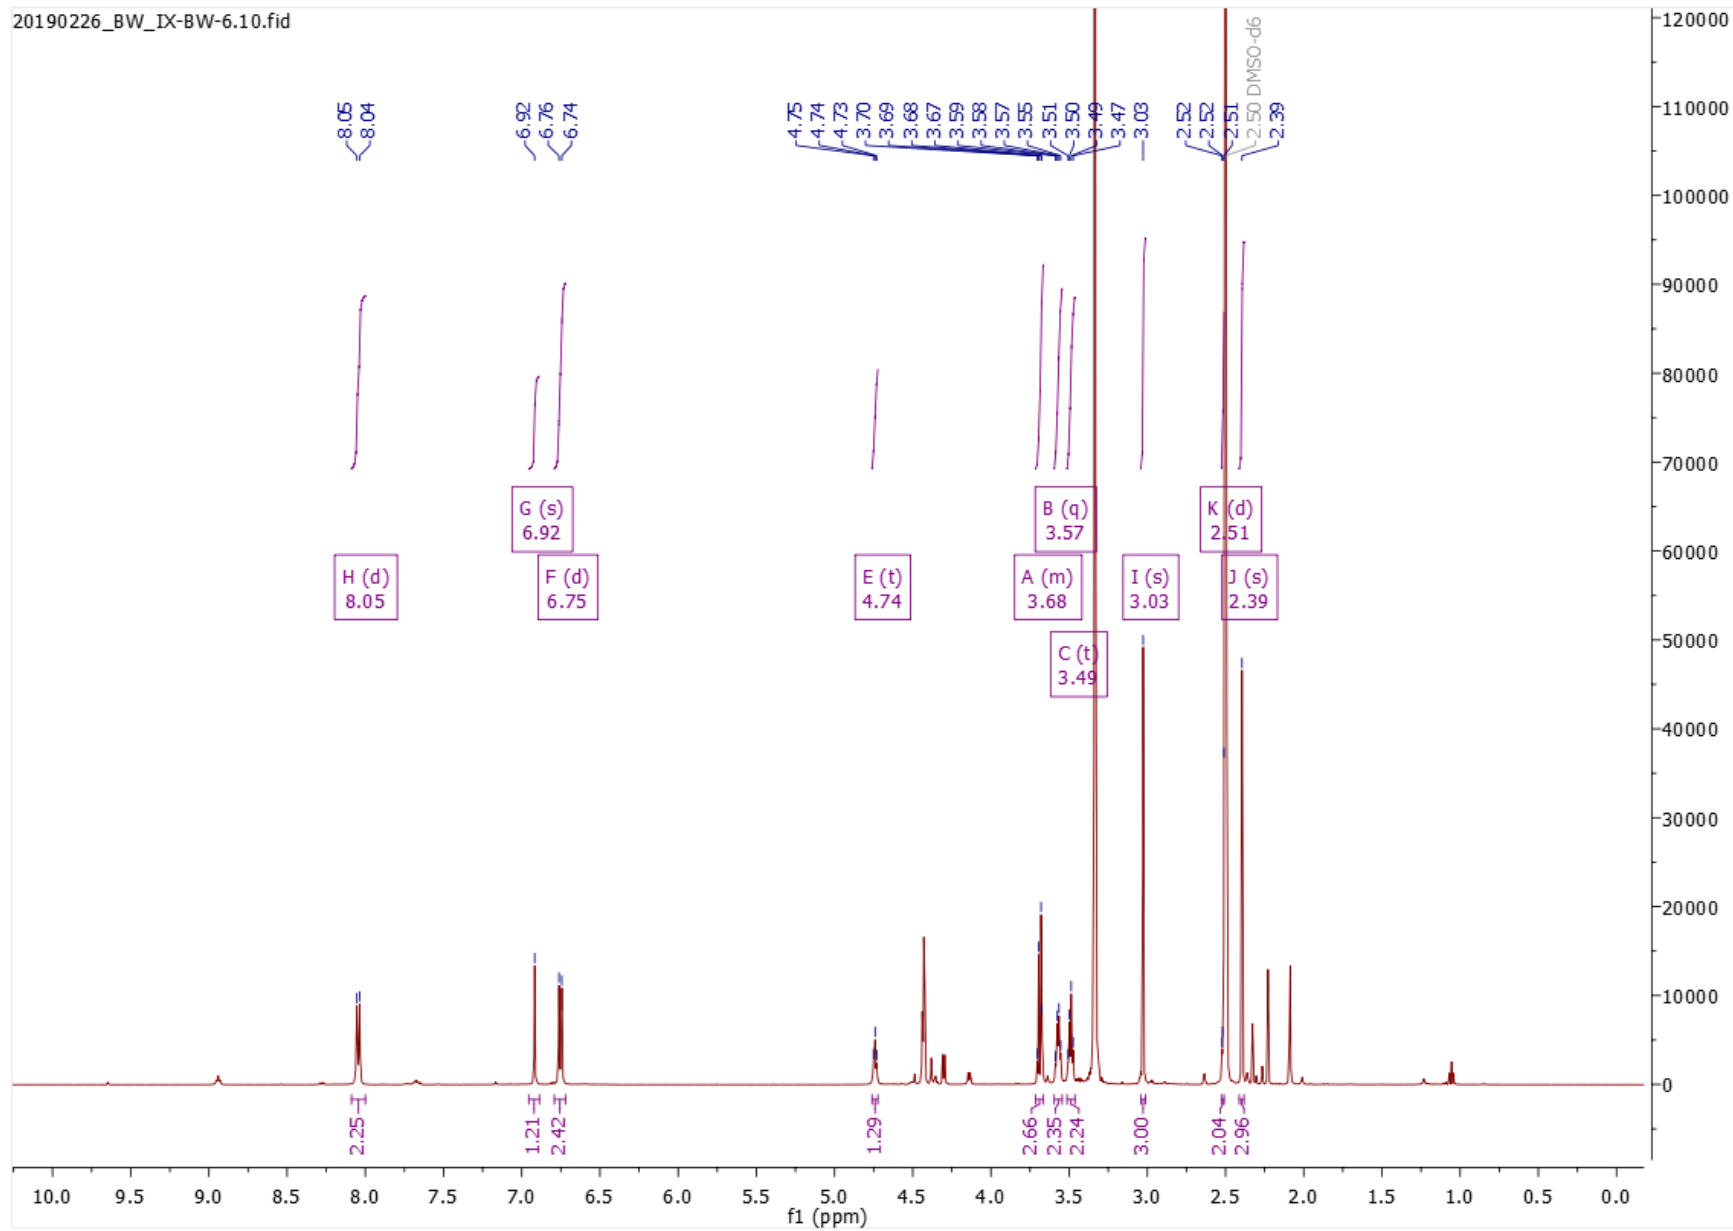

COSY NMR

20190226\_BW\_IX-BW-6.11.ser

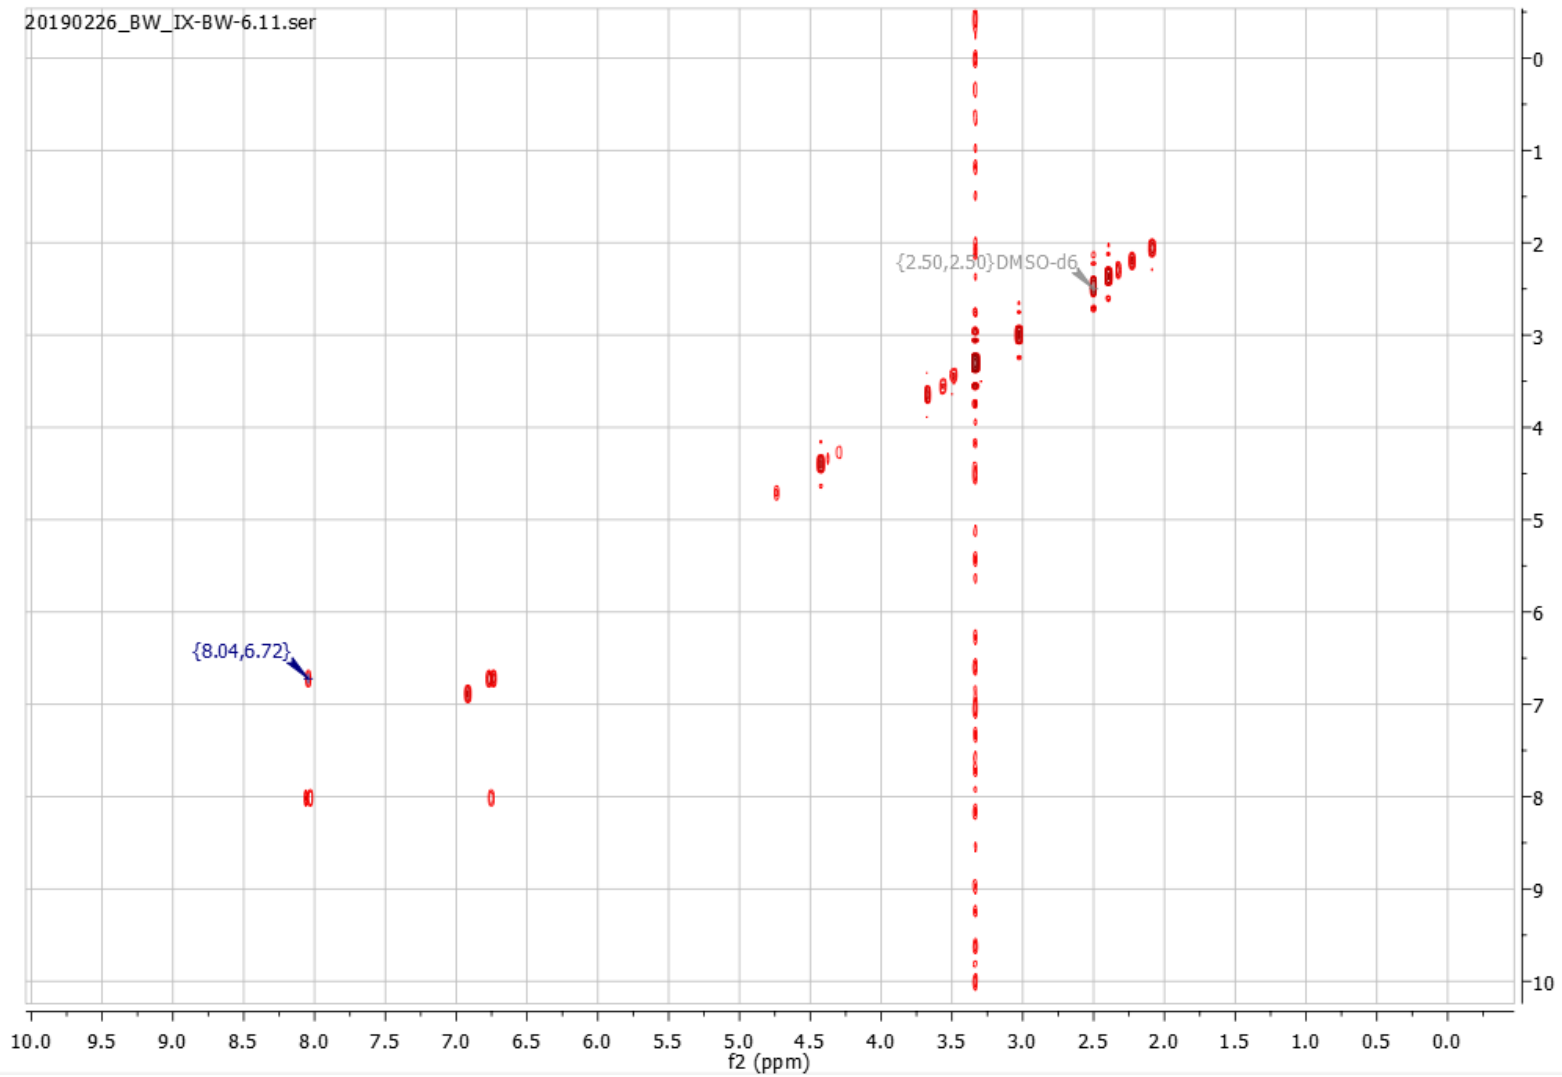



Compound 23: ACVJ-C<sub>3</sub>H<sub>3</sub>

Chemical structure

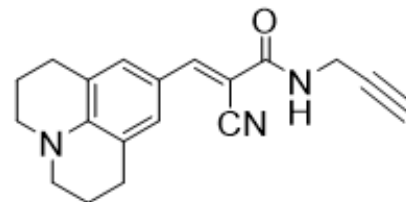

RP-HPLC (conditions b)

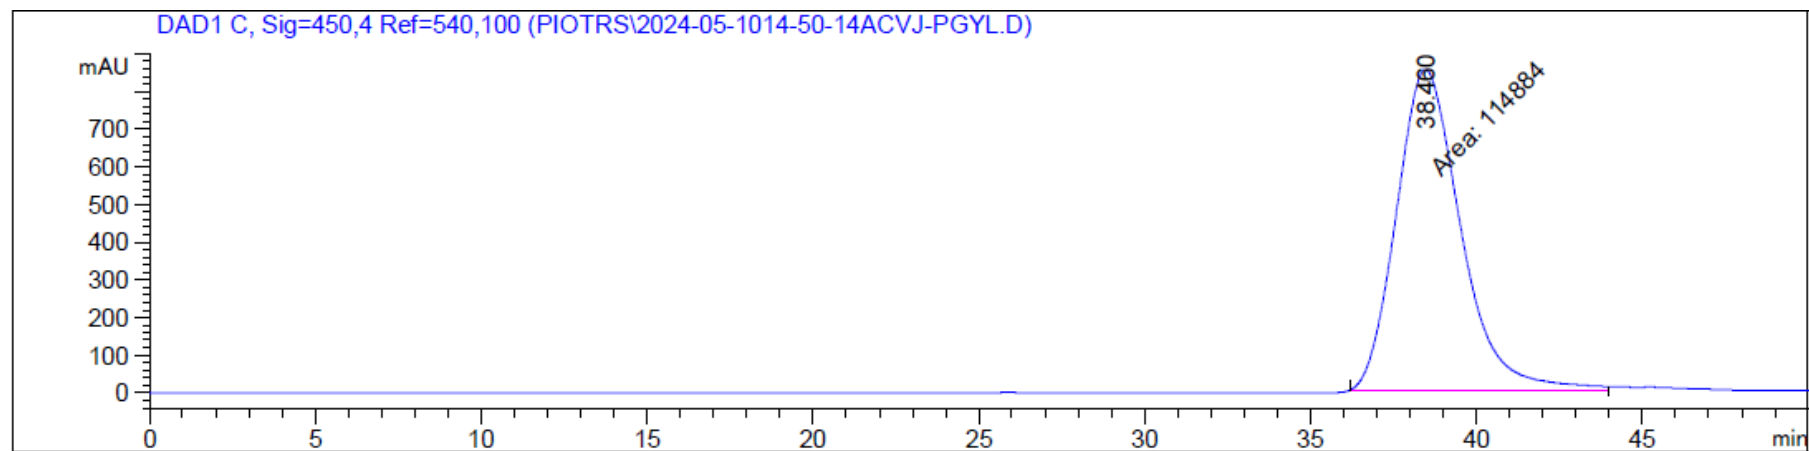

220331\_PSu\_01 #767-866 RT: 6.55-7.41 AV: 100 NL: 1.78E8  
T: FTMS + p ESI Full ms [160.0000-2000.0000]

MS (+) ESI (Calc. [M+H]<sup>+</sup> C<sub>19</sub>H<sub>20</sub>N<sub>3</sub>O<sup>+</sup> : 306.1601, found : 306.15987)

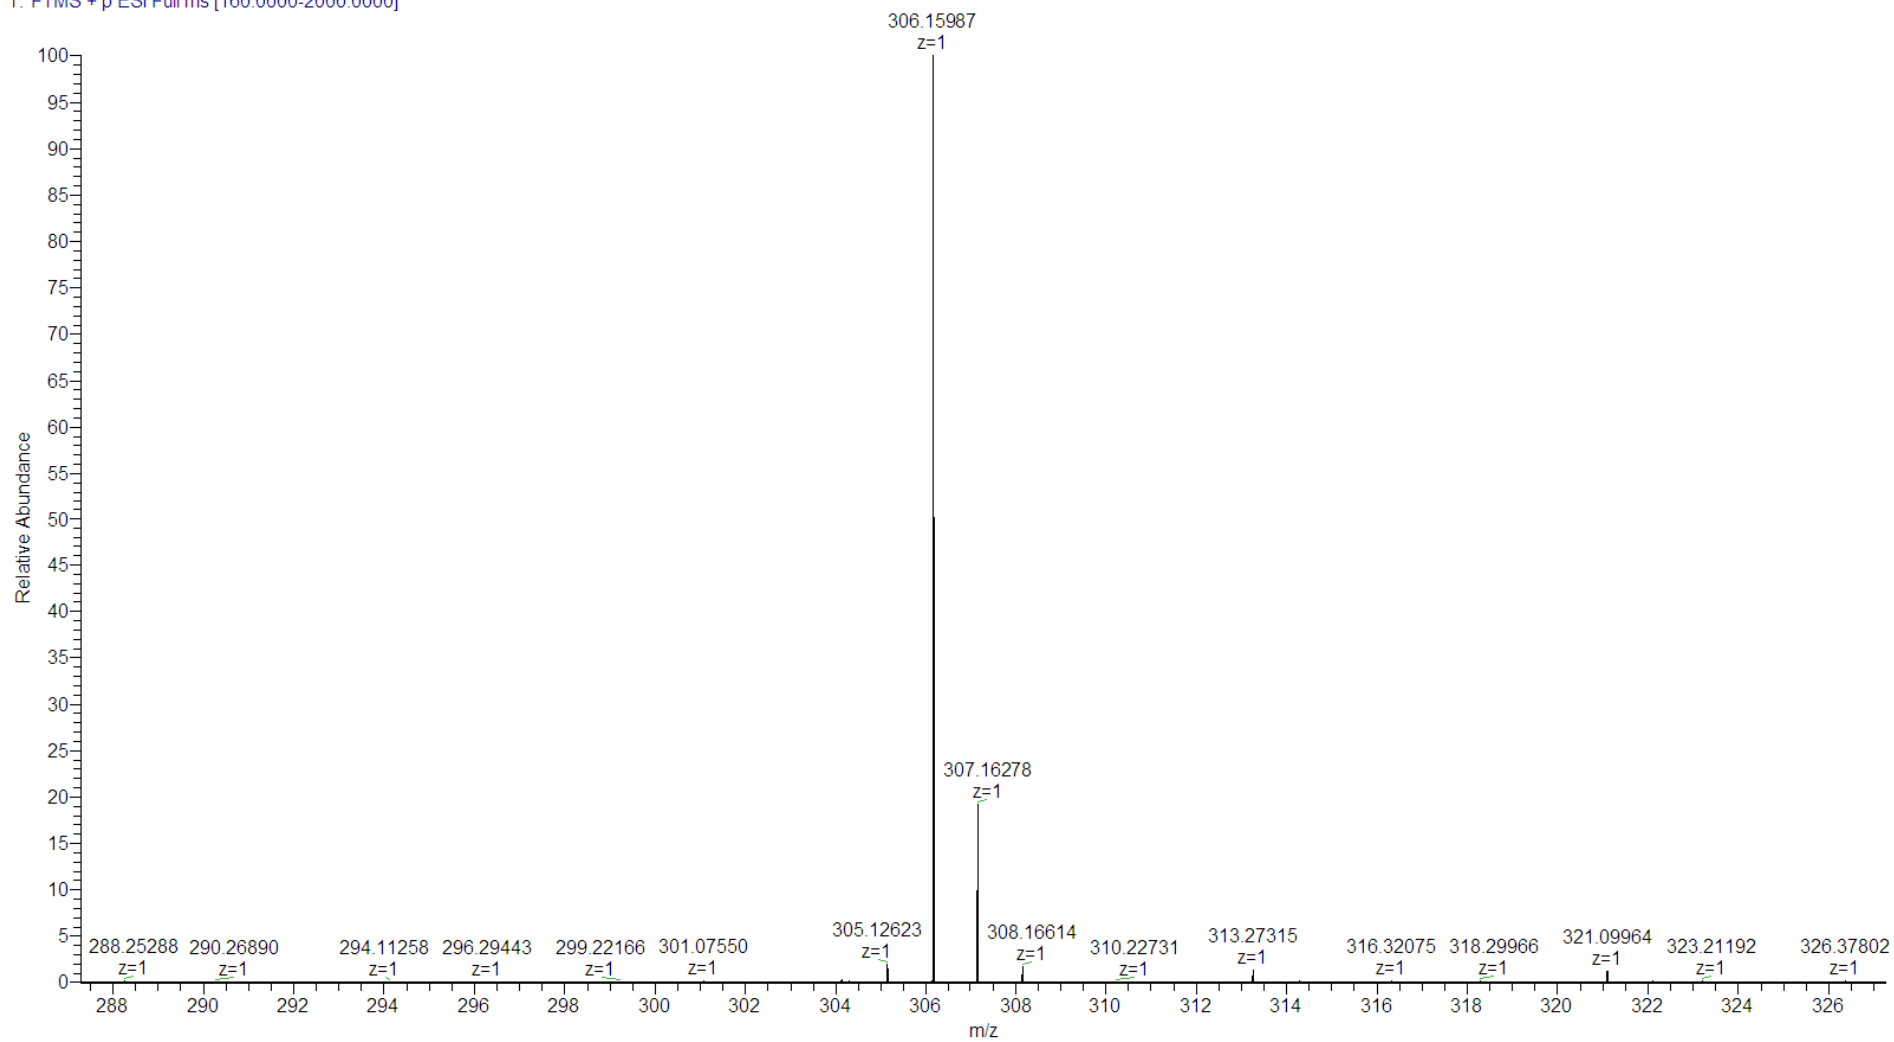

<sup>1</sup>H NMR (500 MHz, DMSO-d<sub>6</sub>, 25°C)

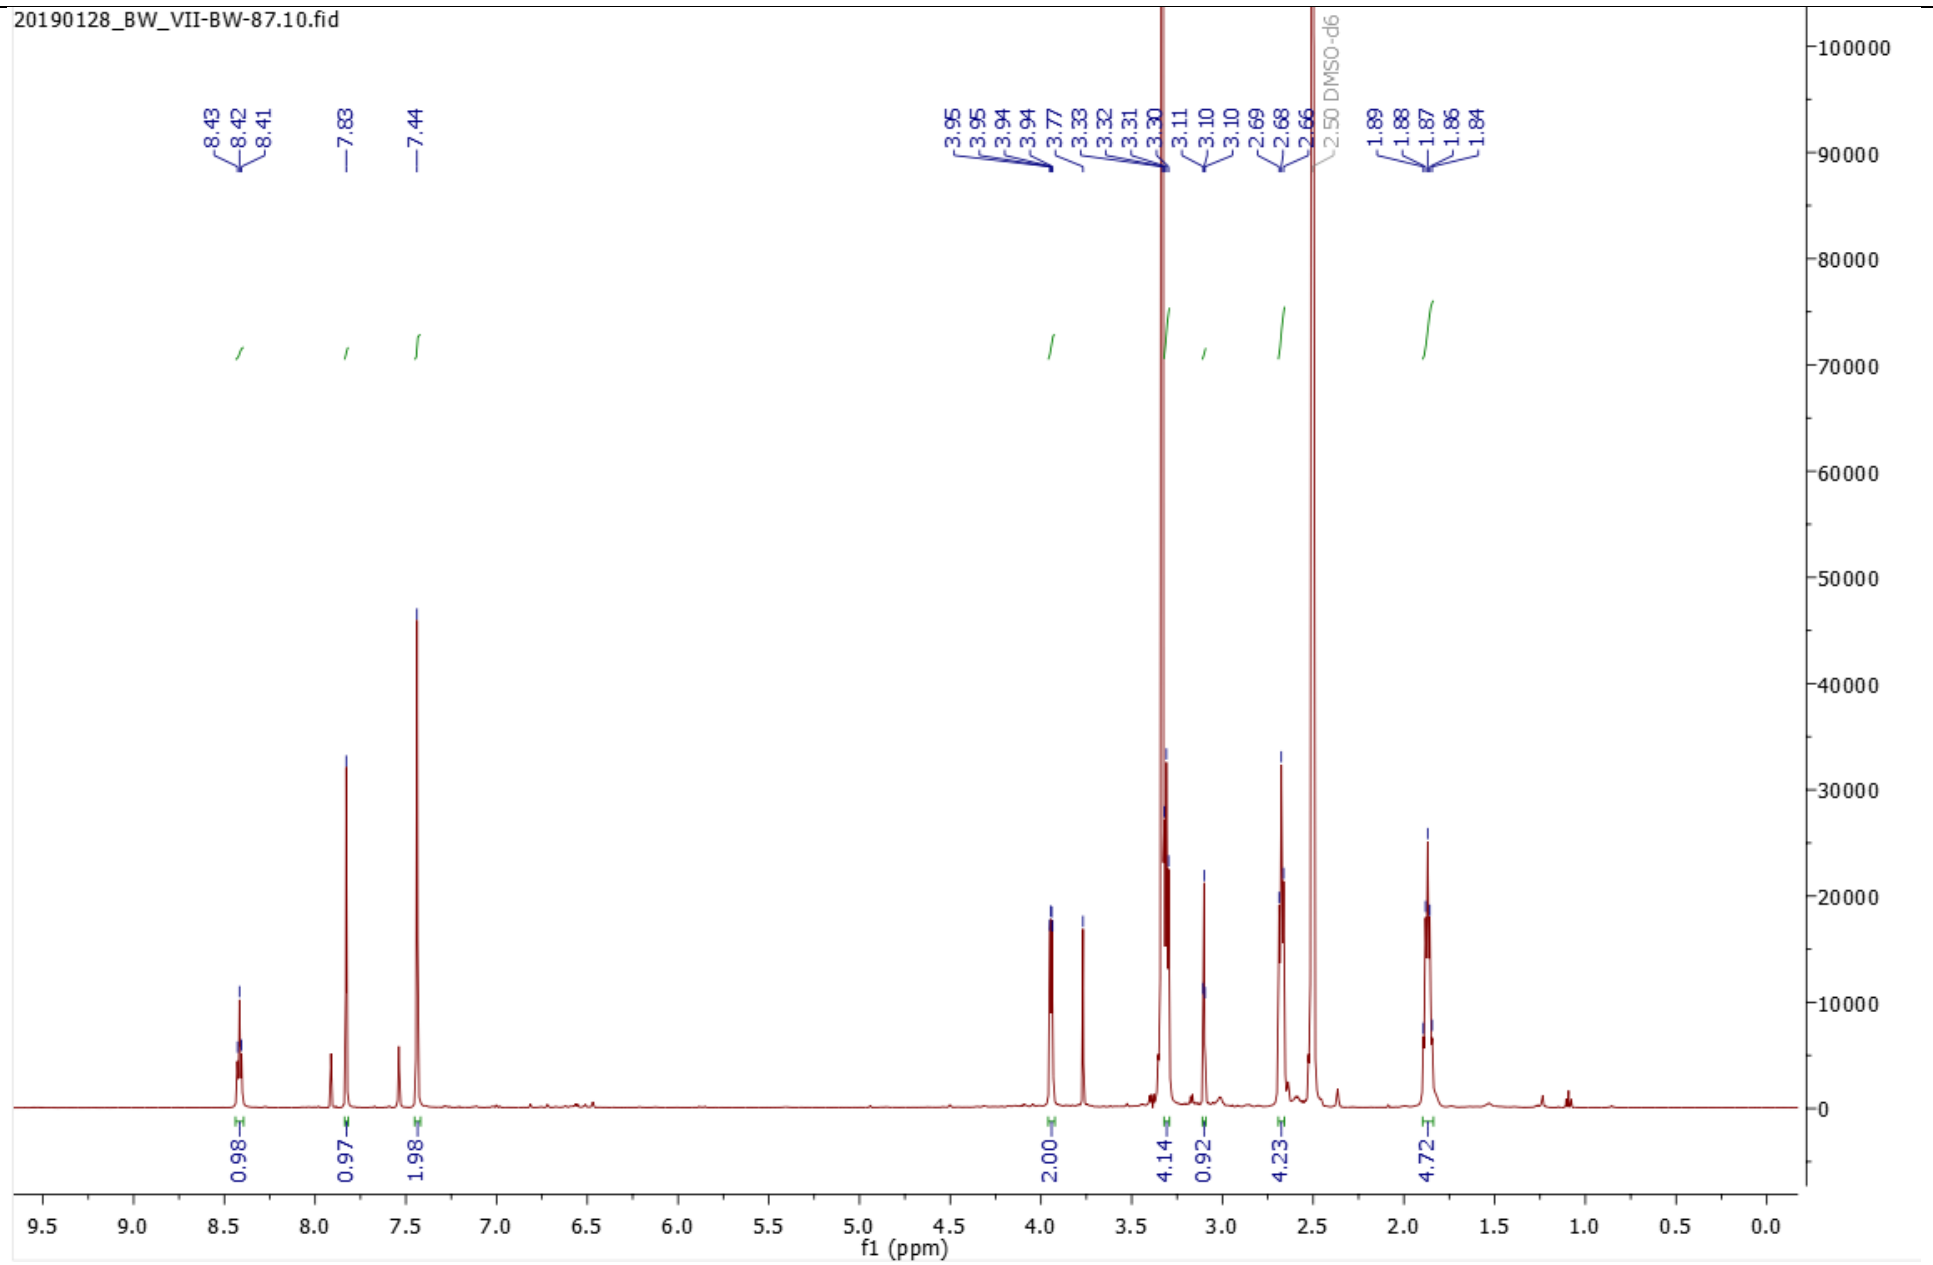

COSY NMR

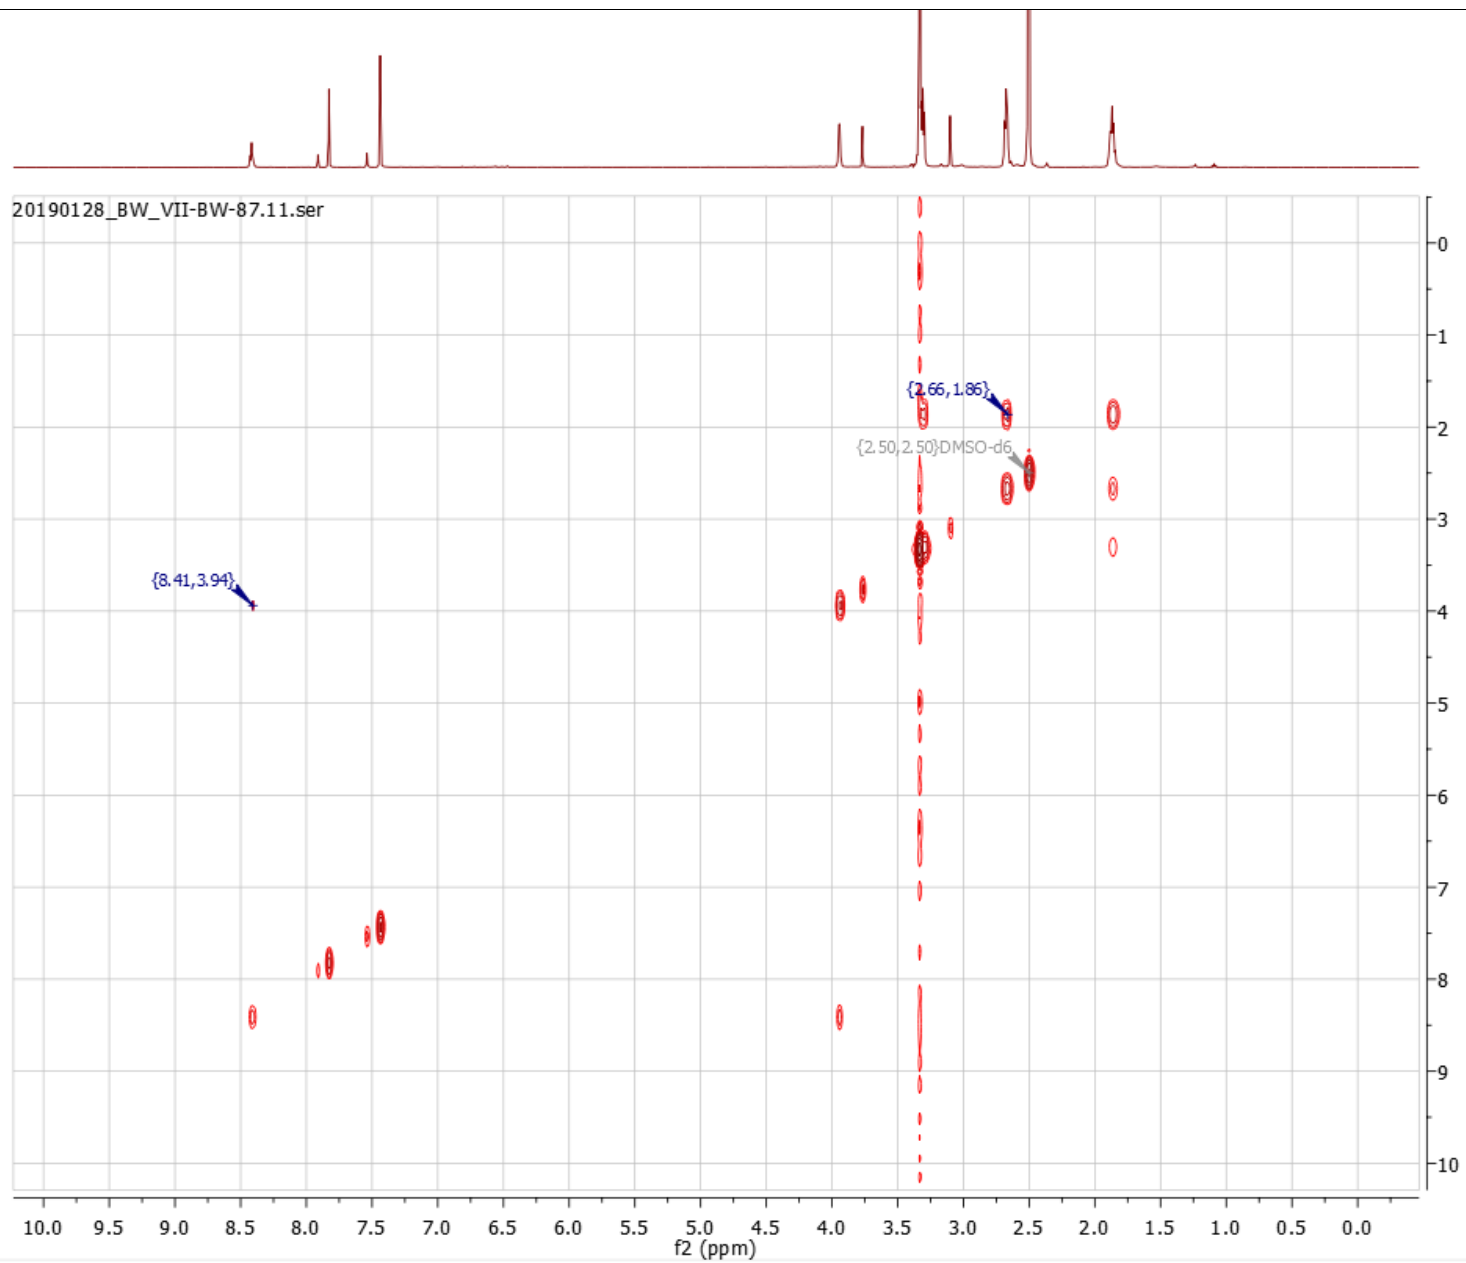

Compound 24: DMHBI-CH<sub>2</sub>CH<sub>2</sub>-N<sub>3</sub>

Chemical structure

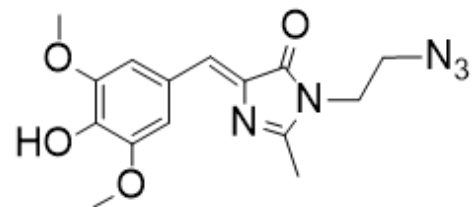

RP-HPLC (conditions c)

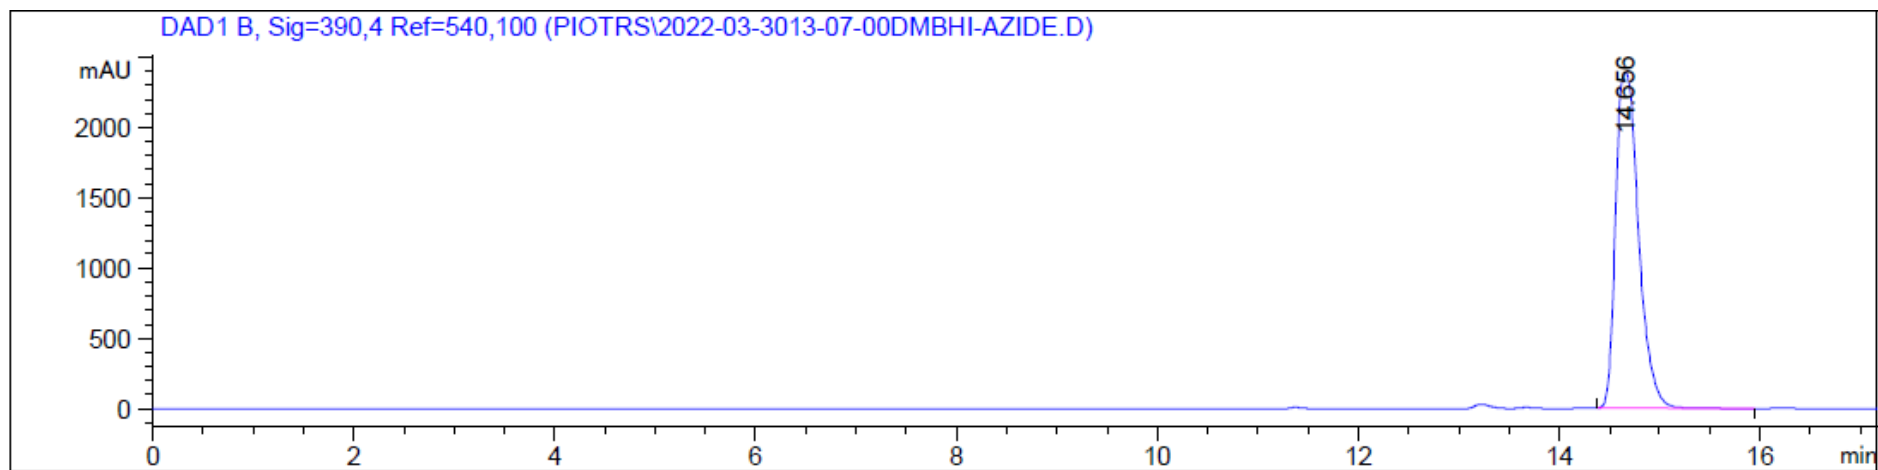

220331\_PSu\_02 #49-73 RT: 0.43-0.64 AV: 25 NL: 2.65E8  
T: FTMS + p ESI Full ms [160.0000-2000.0000]

MS (+) ESI (Calc.  $[M-H]^+ C_{15}H_{18}N_5O_4^+$  : 332.1353, found : 332.13507)

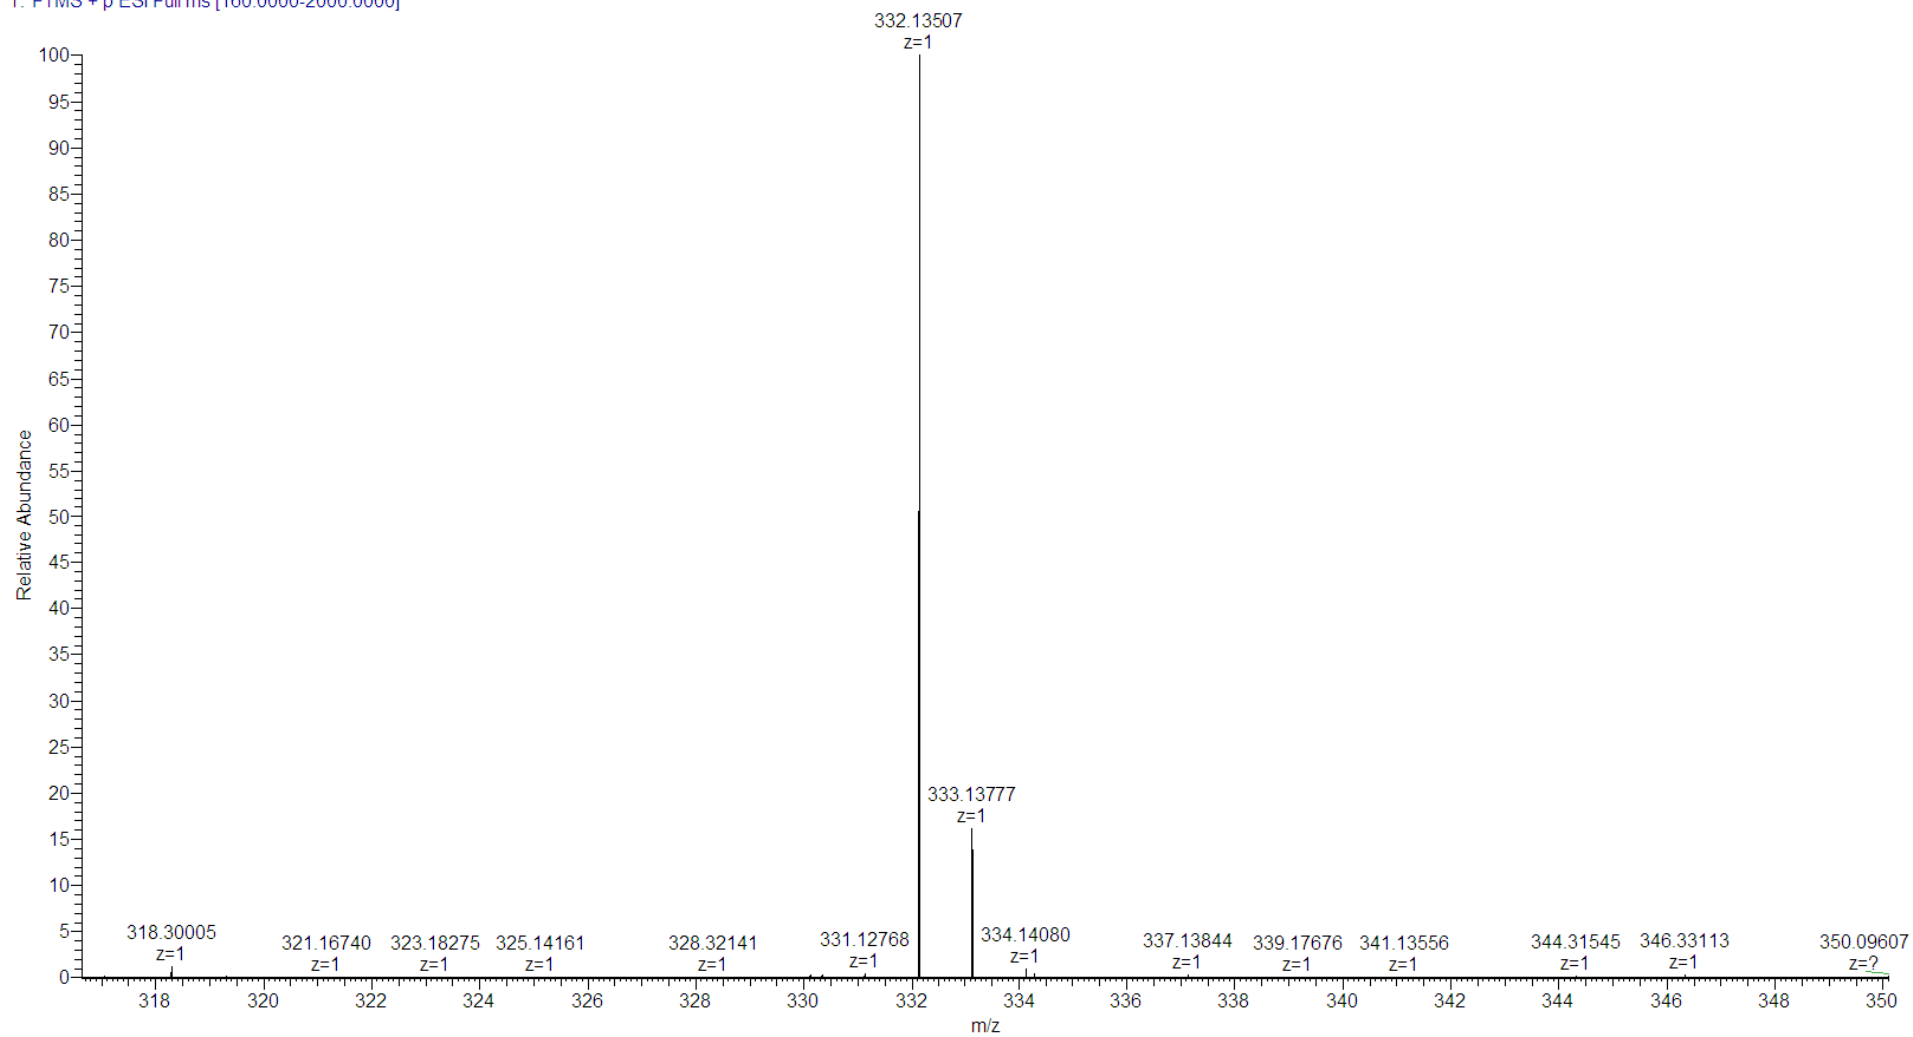

<sup>1</sup>H NMR (500 MHz, DMSO-d<sub>6</sub>, 25°C)

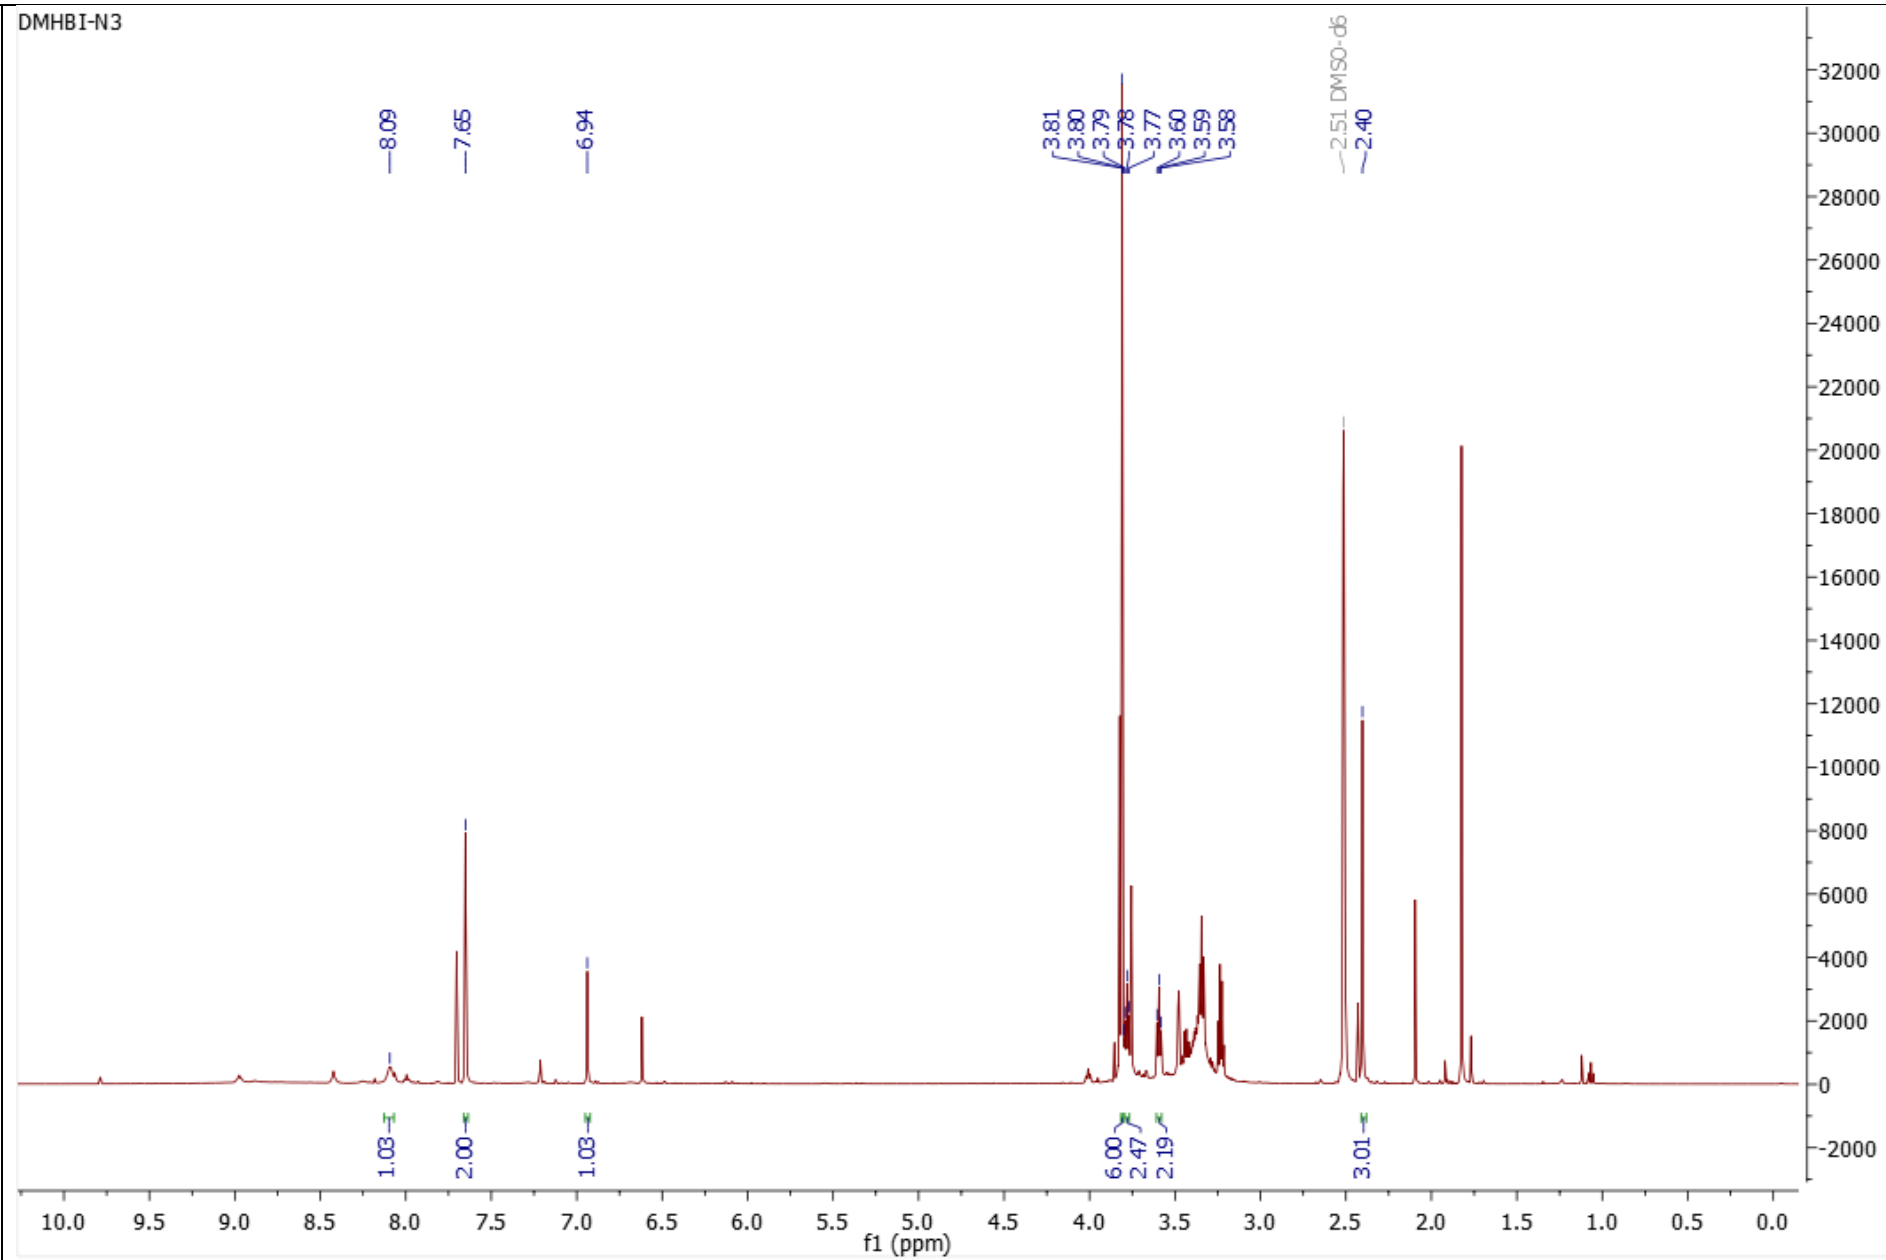

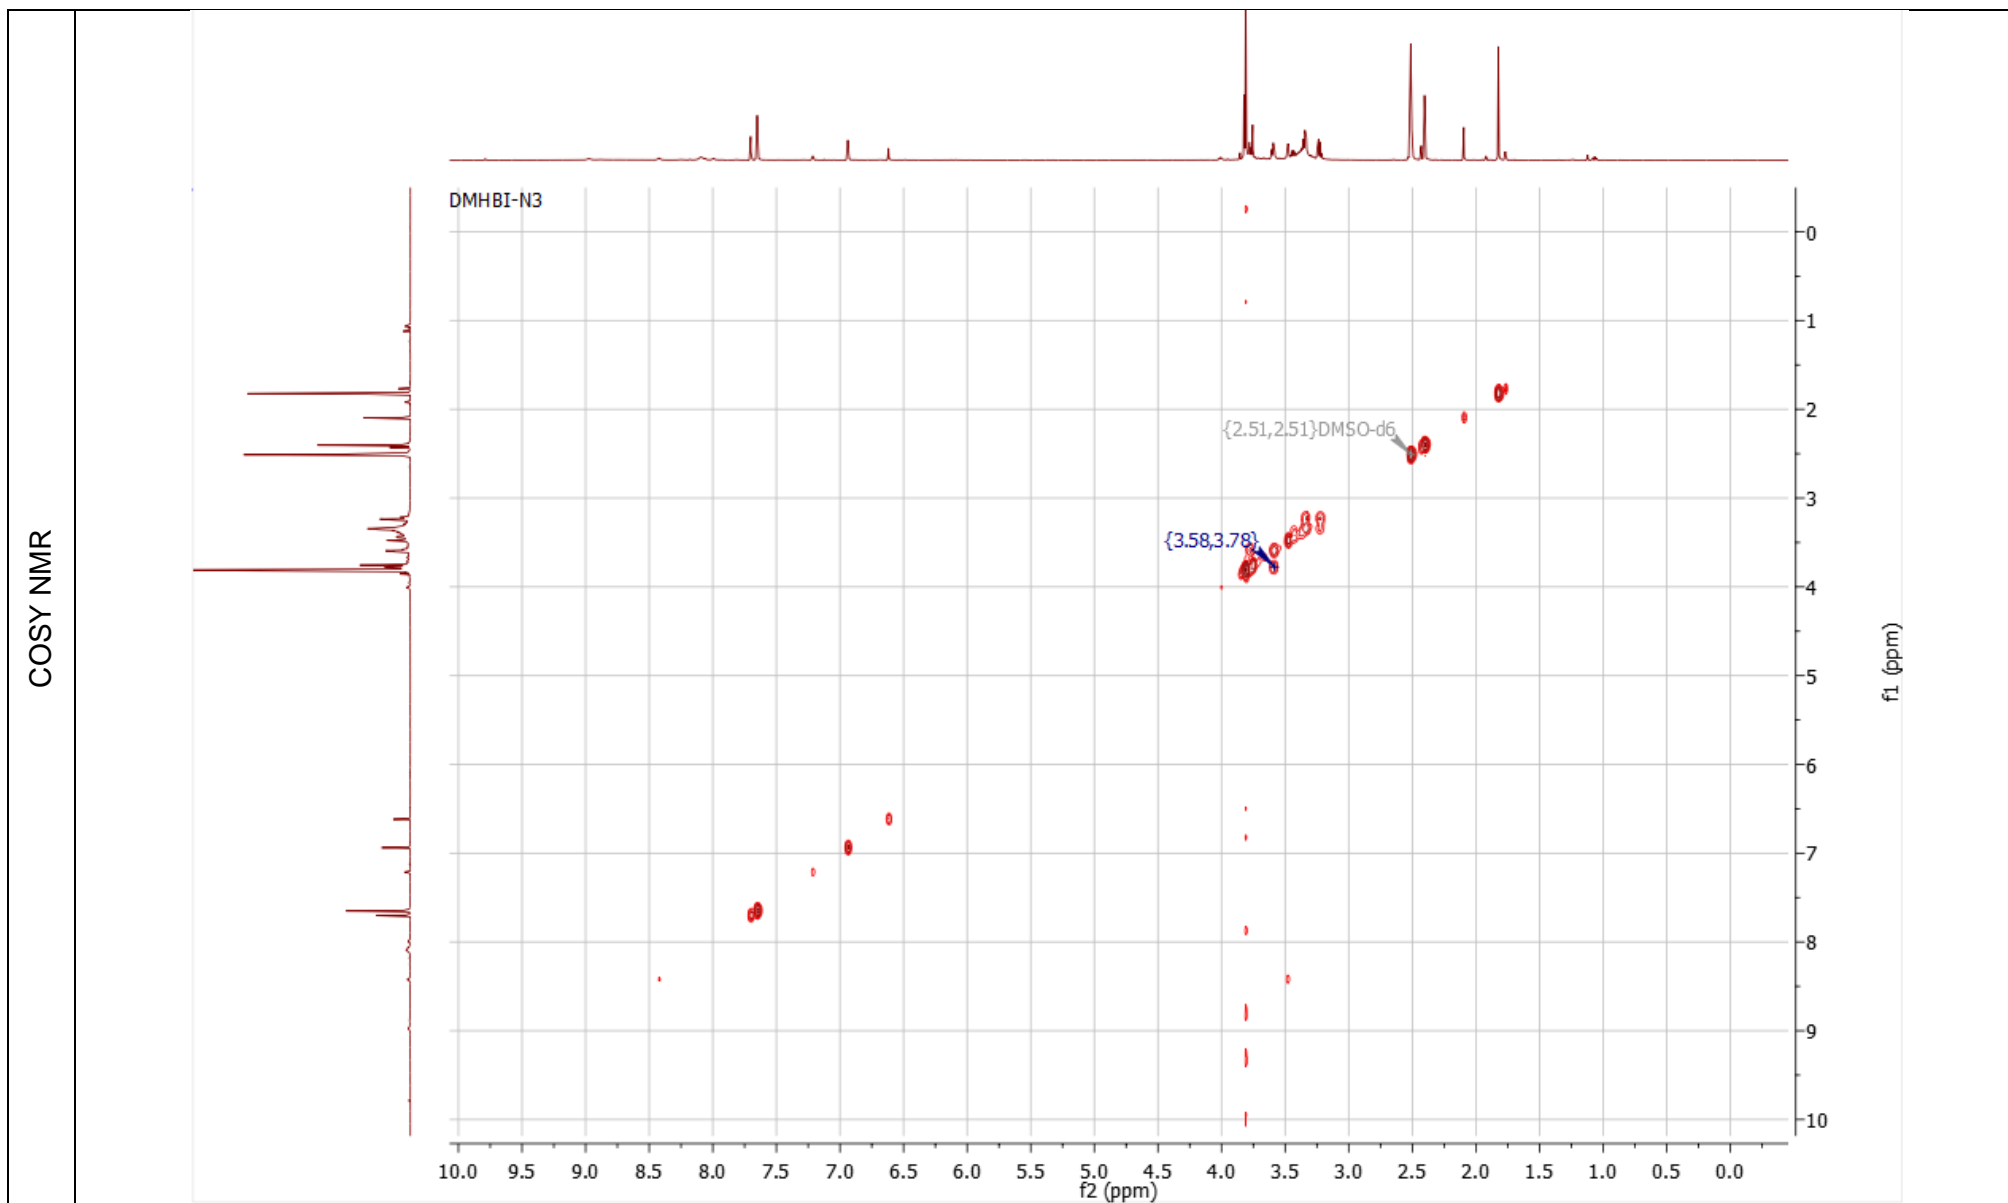



Compound 25: oHBI-CH<sub>2</sub>CH<sub>2</sub>-N<sub>3</sub>

Chemical structure

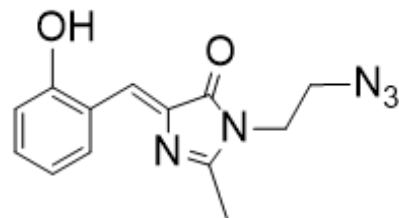

RP-HPLC (conditions b)

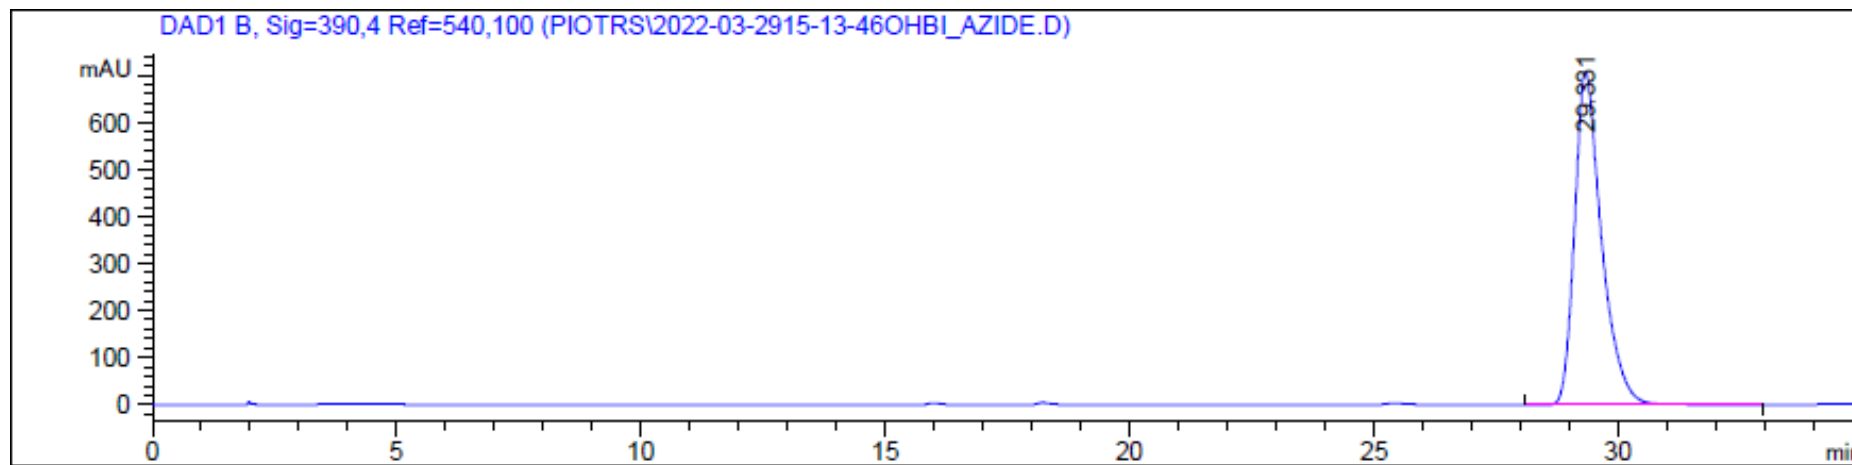

220331\_PSu\_03 #110-162 RT: 0.96-1.42 AV: 53 NL: 2.87E8  
T: FTMS + p ESI Full ms [160.0000-2000.0000]

MS (+) ESI (Calc.  $[M+H]^+$  C<sub>13</sub>H<sub>14</sub>N<sub>5</sub>O<sub>2</sub><sup>+</sup> : 272.1142, found: 272.11418)

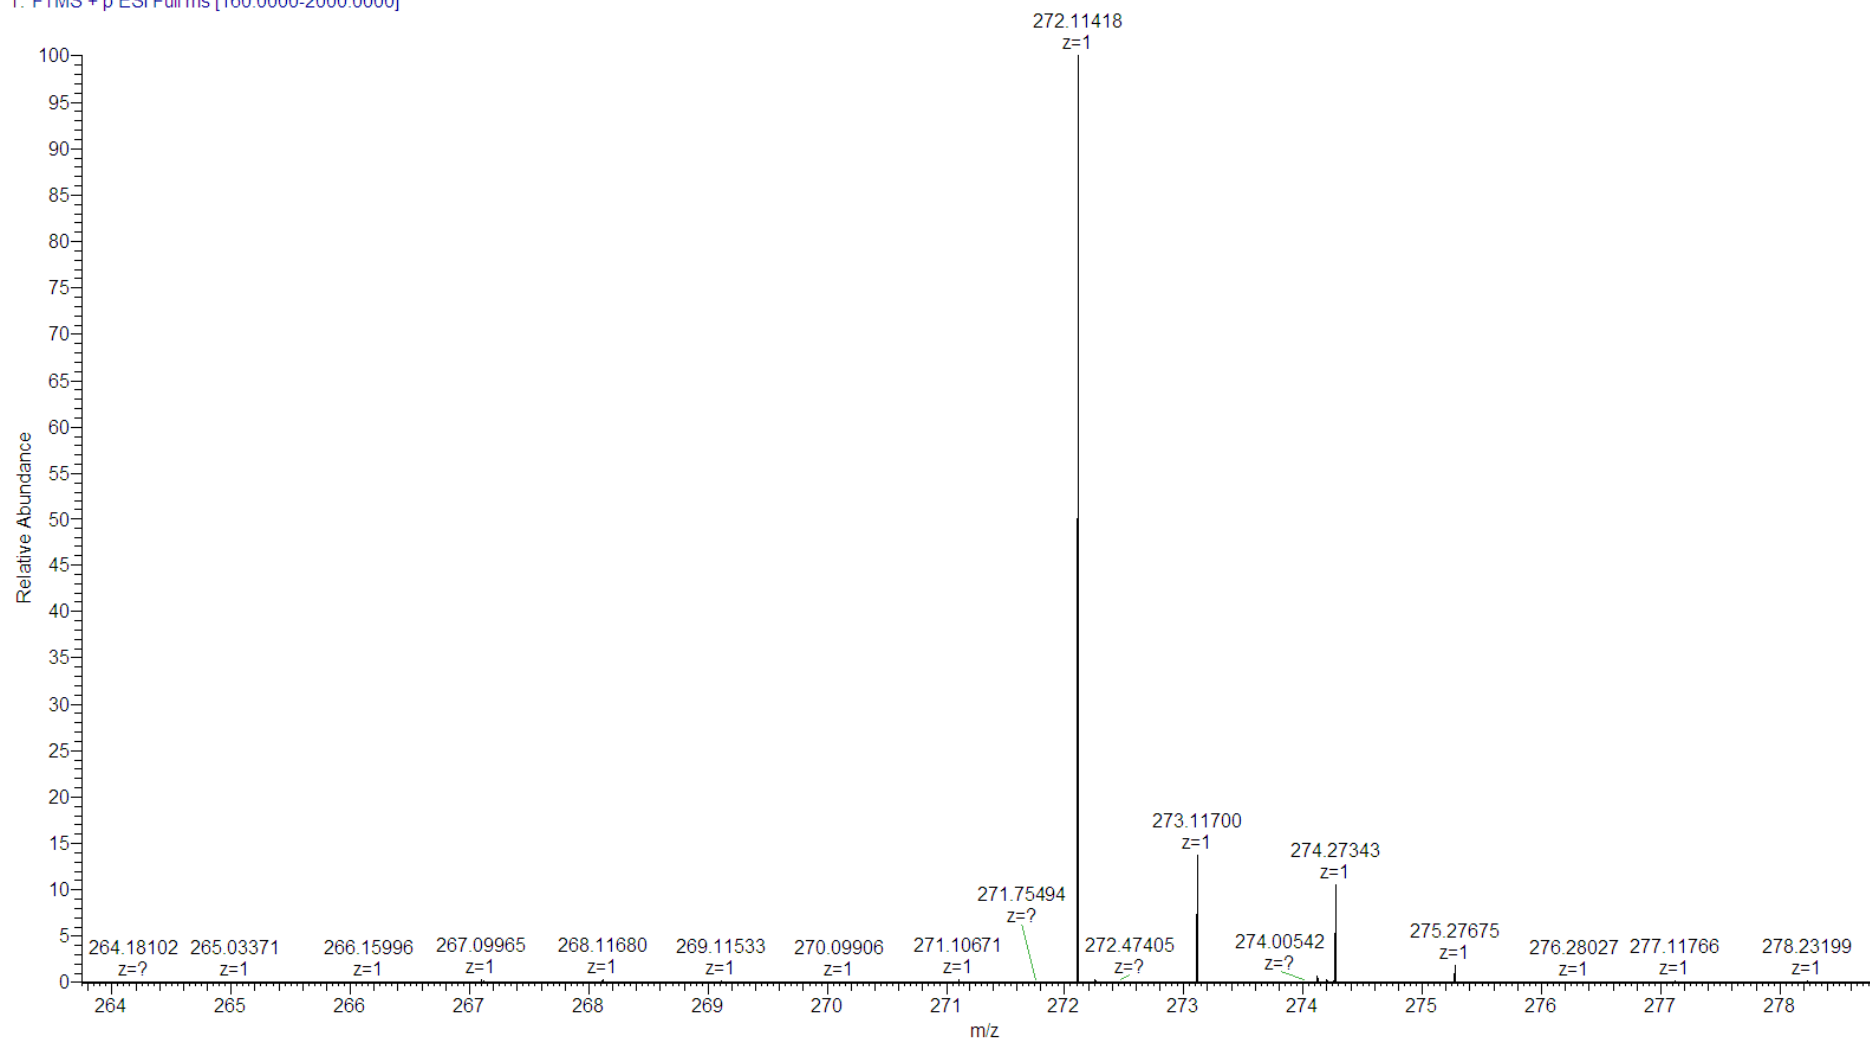

<sup>1</sup>H NMR (500 MHz, DMSO-d<sub>6</sub>, 25°C)

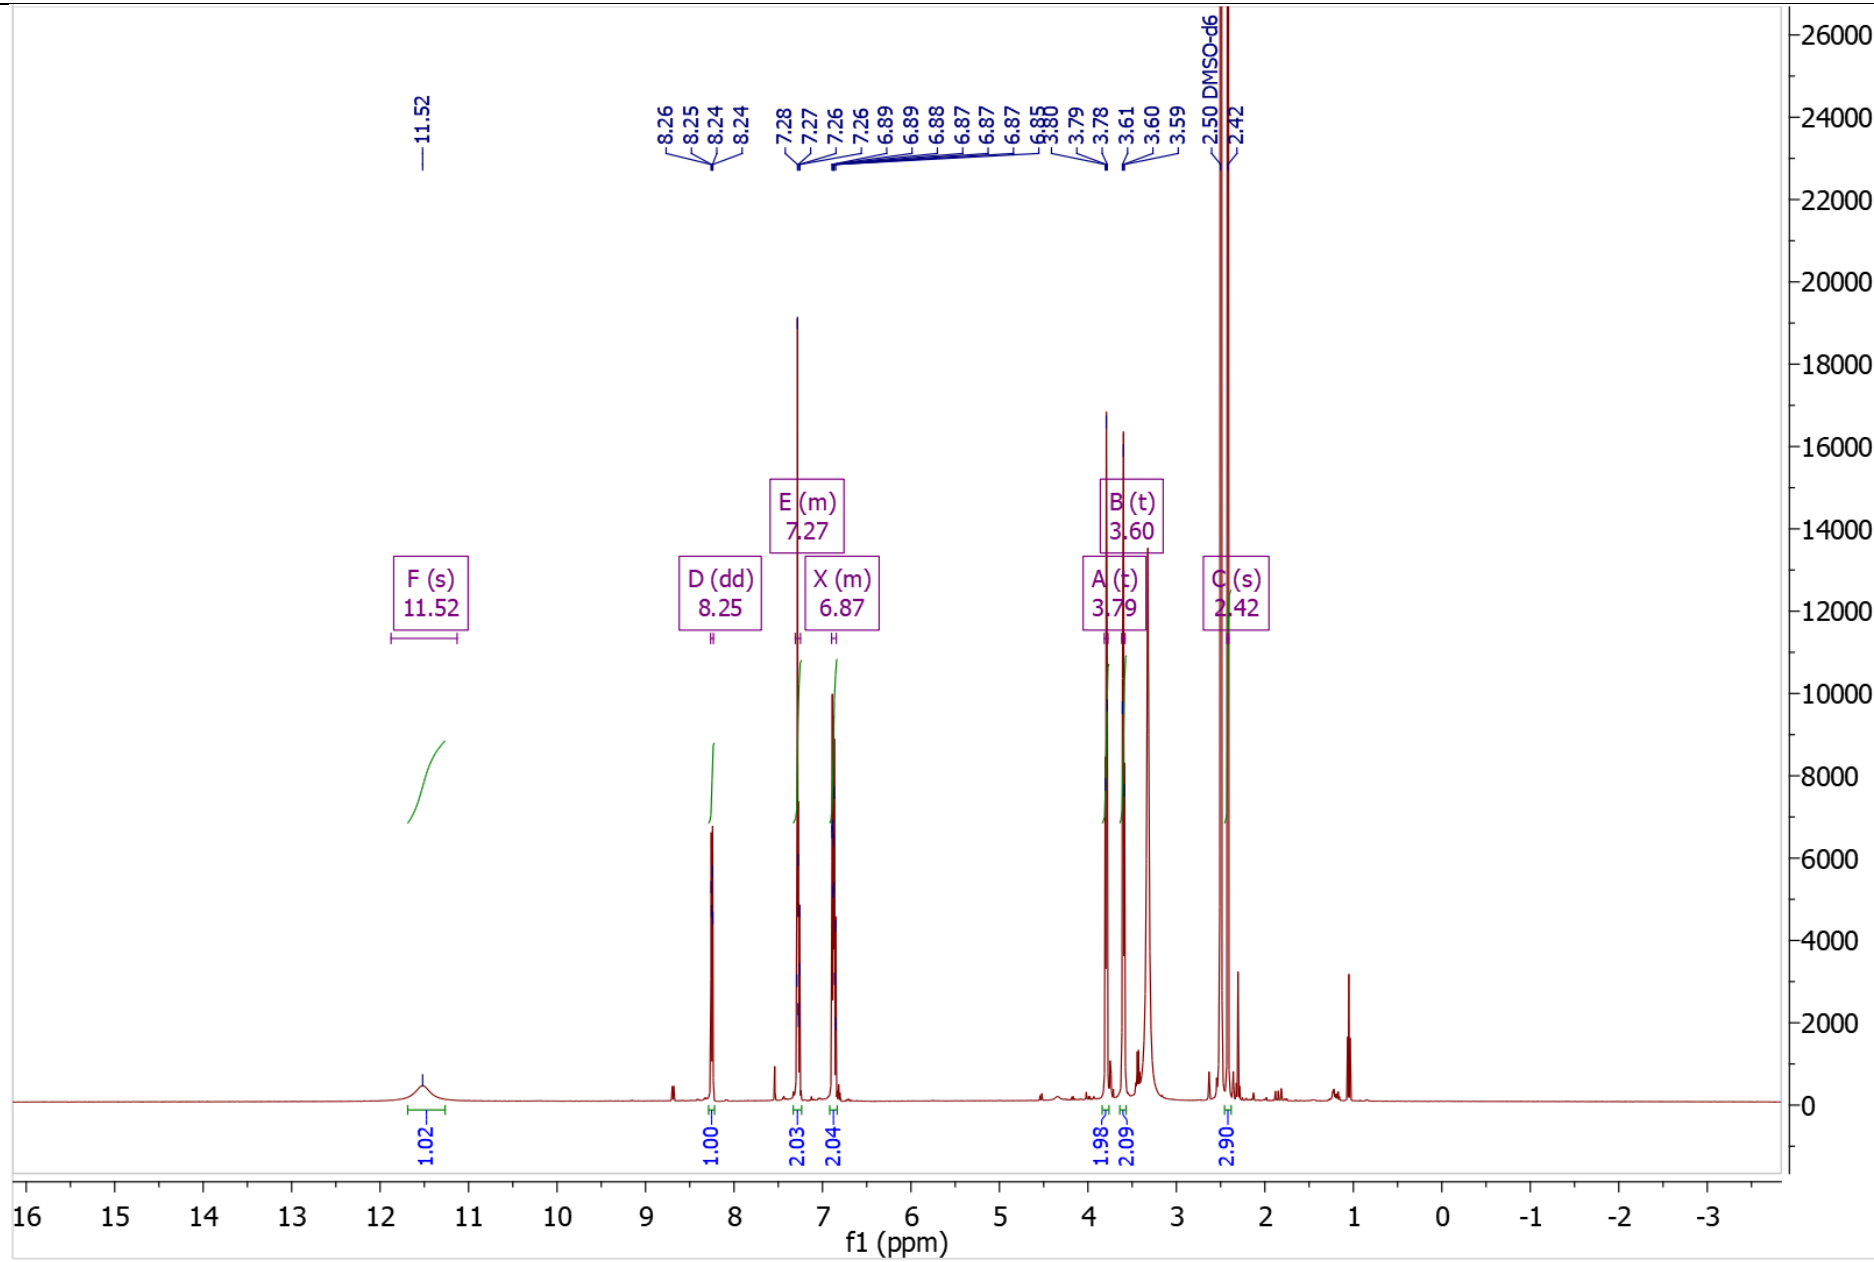

COSY NMR

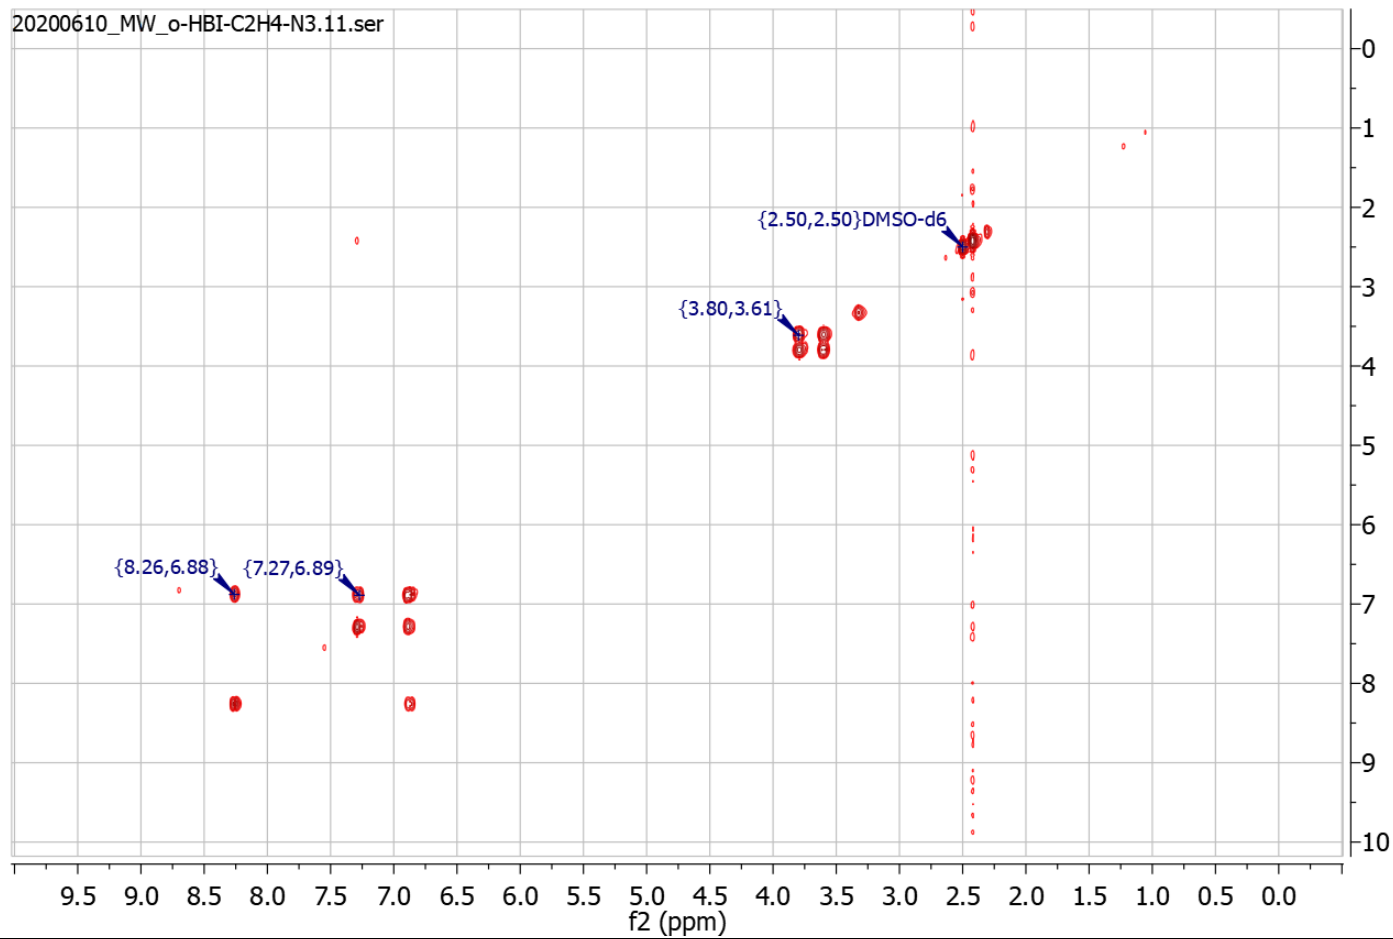

## UV-VIS, excitation and emission spectra

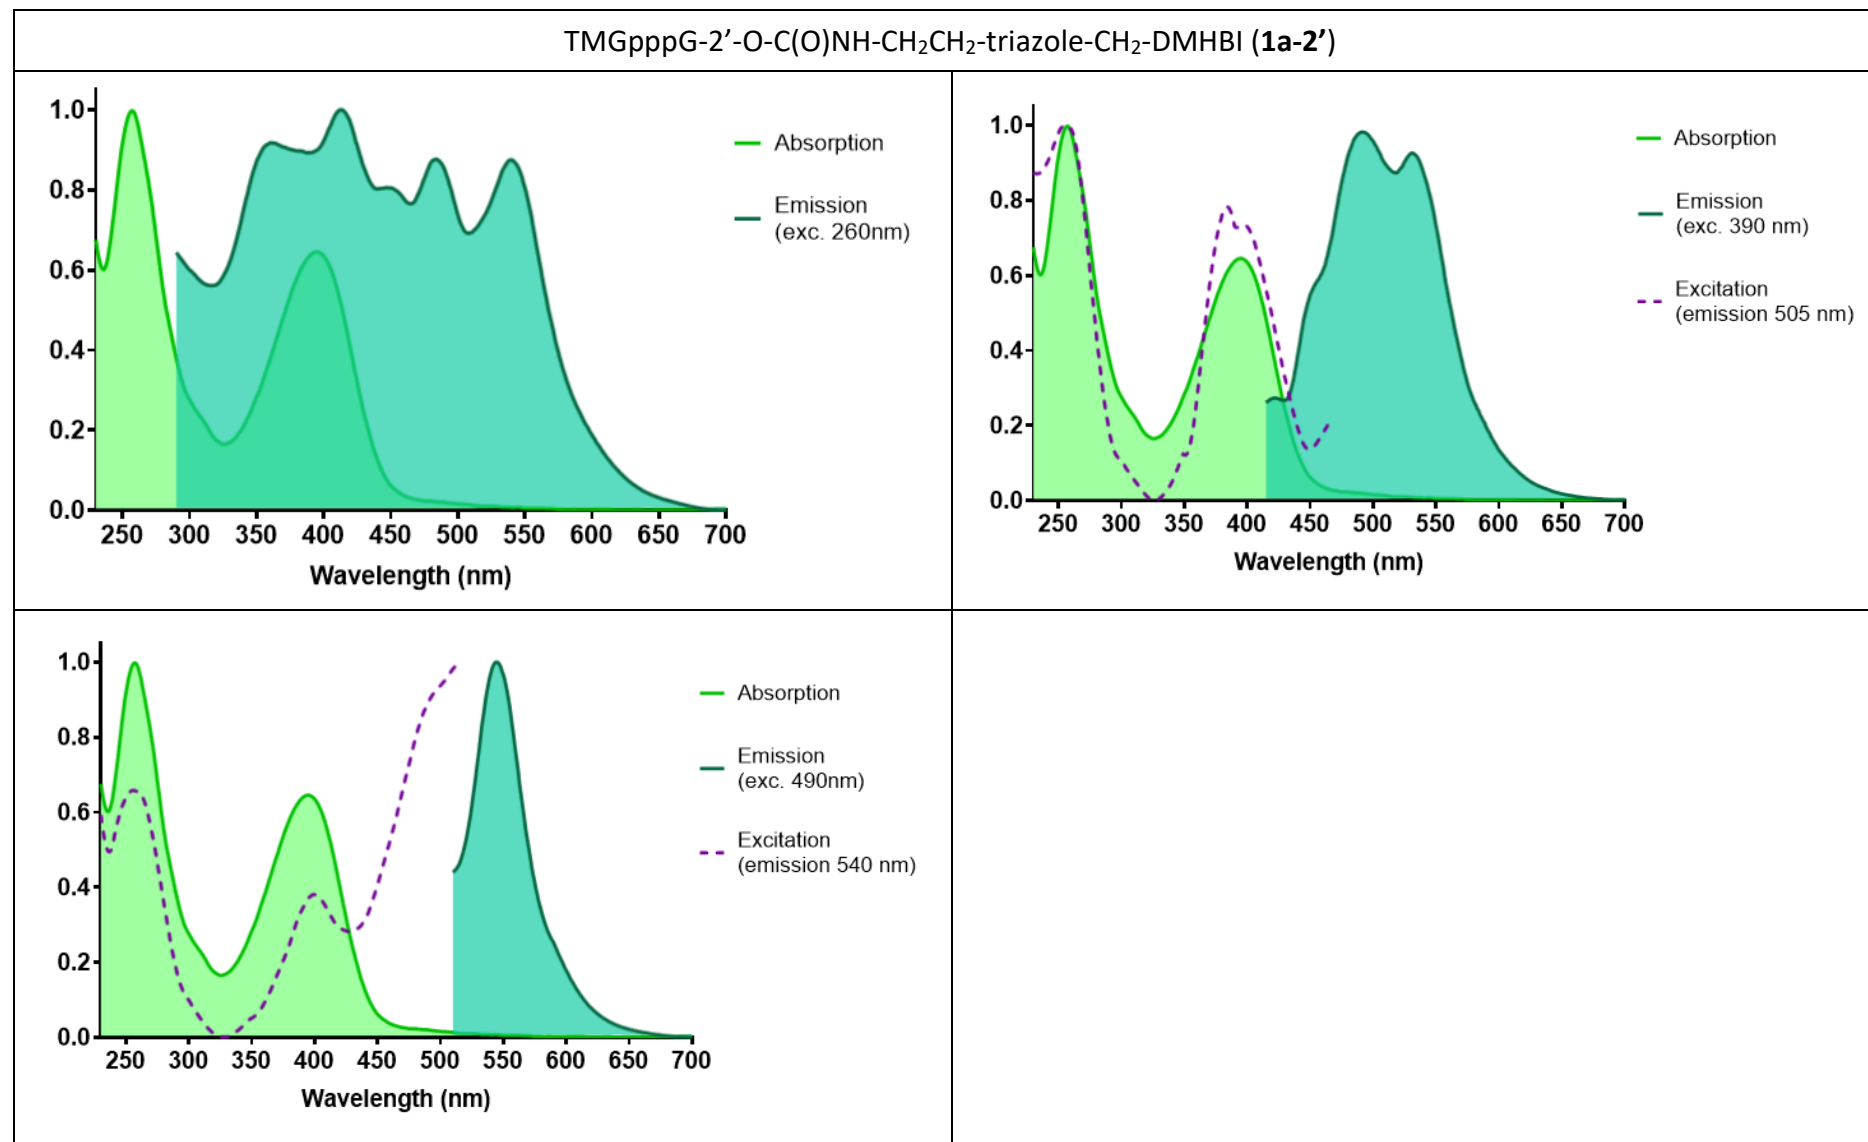

TMGpppG-3'-O-C(O)NH-CH<sub>2</sub>CH<sub>2</sub>-triazole-CH<sub>2</sub>-DMHBI (1a-3')

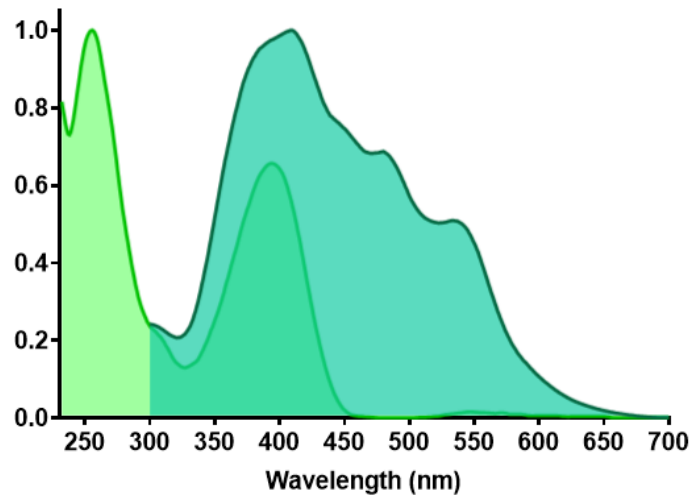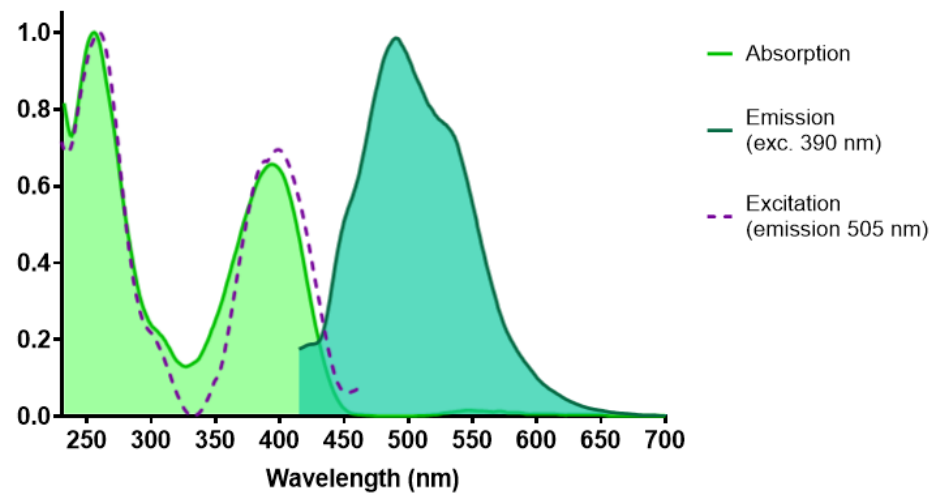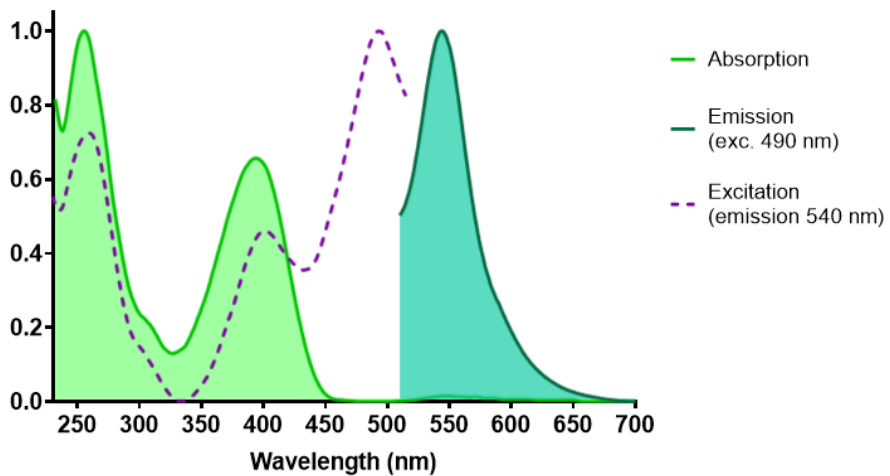

TMG-5'-S-pppG-2'-O-C(O)NH-CH<sub>2</sub>CH<sub>2</sub>-triazole-CH<sub>2</sub>-DMHBI (2a-2')

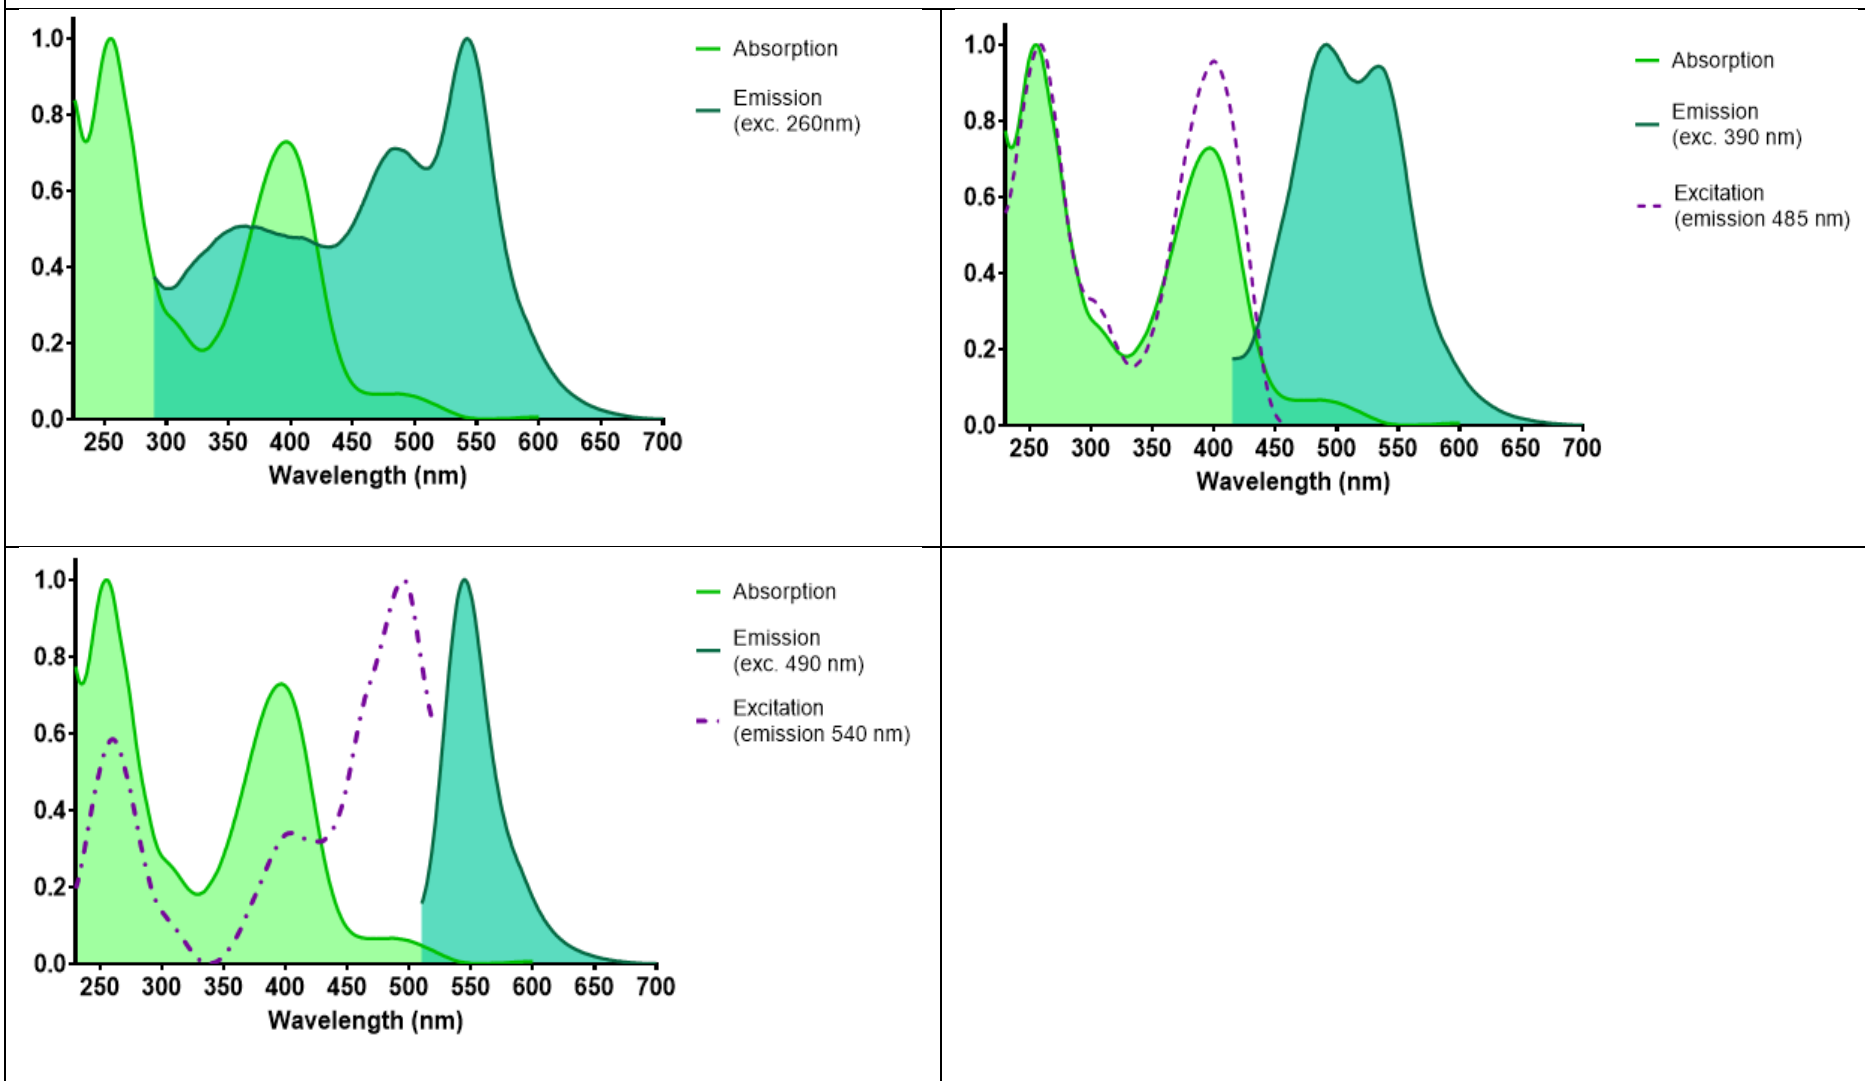

TMG-5'-S-pppG-3'-O-C(O)NH-CH<sub>2</sub>CH<sub>2</sub>-triazole-CH<sub>2</sub>-DMHBI (2a-3')

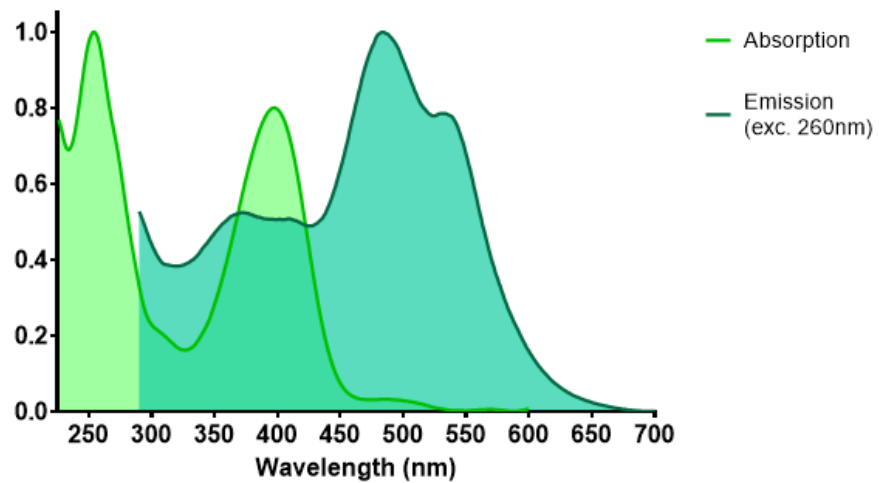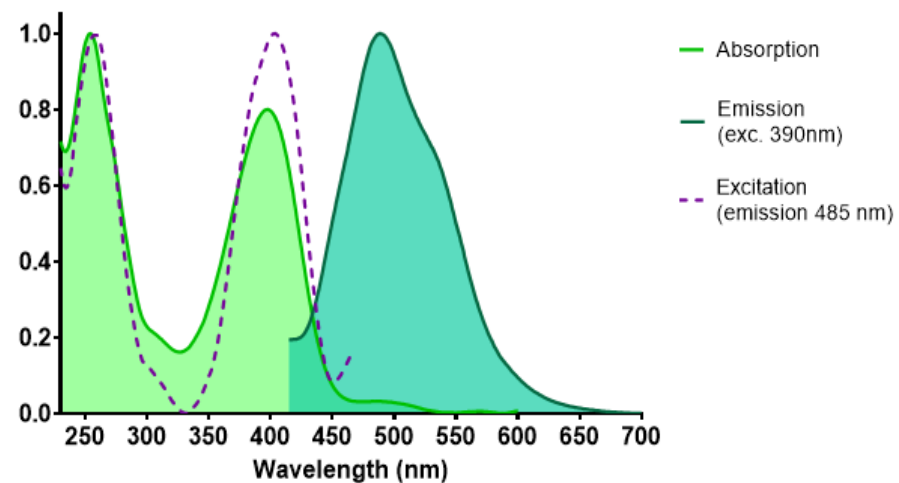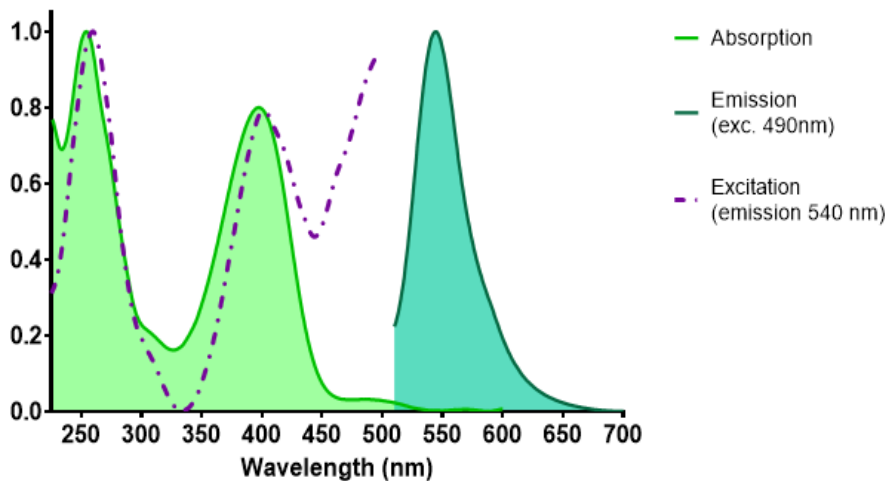



TMGppCH<sub>2</sub>pG-2'-O-C(O)NH-CH<sub>2</sub>CH<sub>2</sub>-triazole-CH<sub>2</sub>-DMHBI (3a-2')

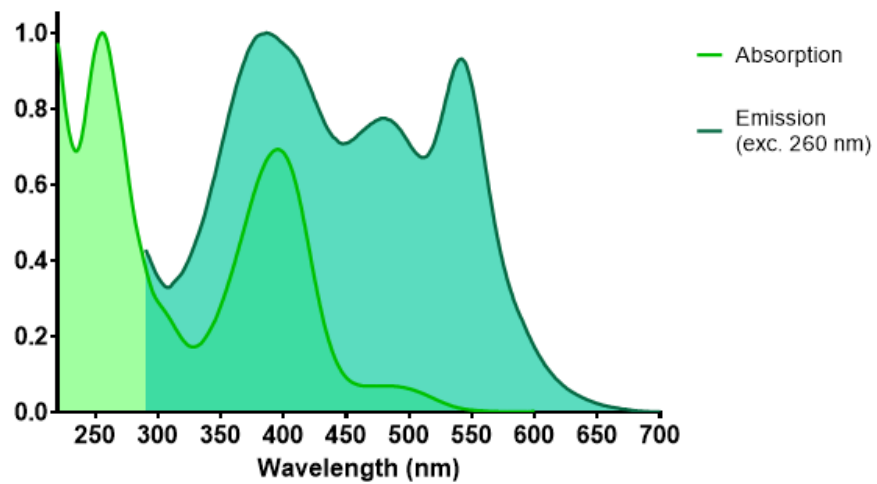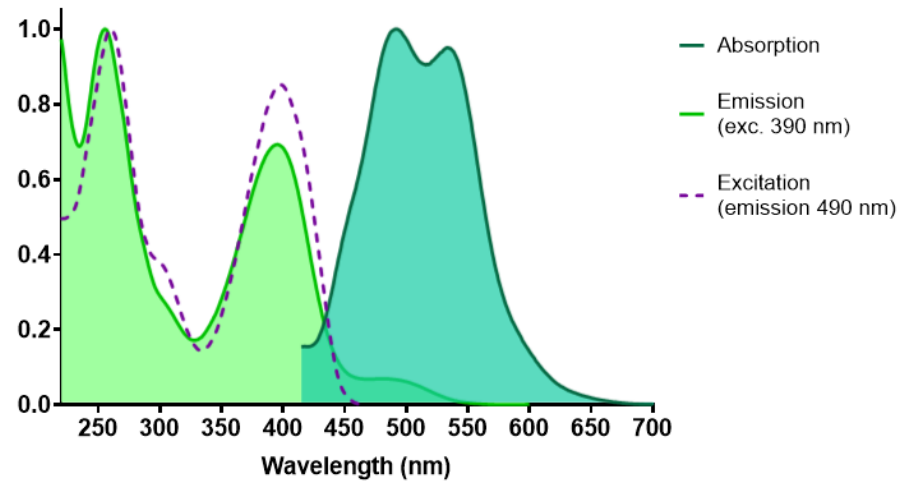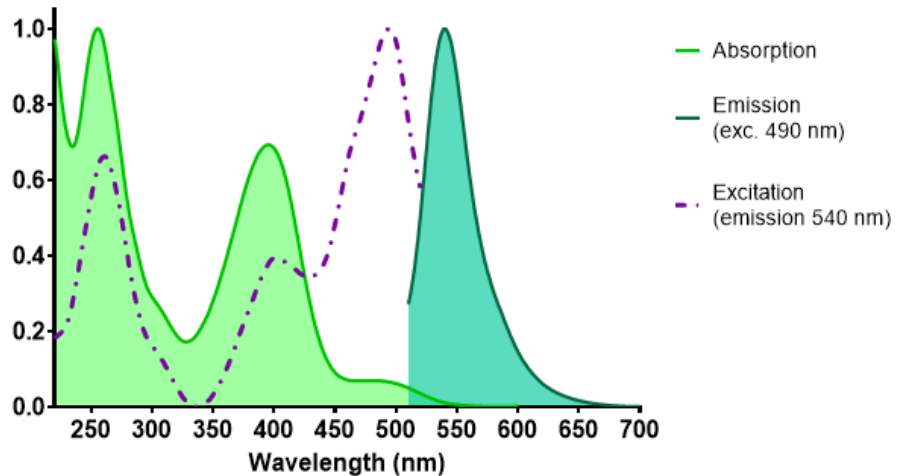

TMGppCH<sub>2</sub>pG-3'-O-C(O)NH-CH<sub>2</sub>CH<sub>2</sub>-triazole-CH<sub>2</sub>-DMHBI (3a-3')

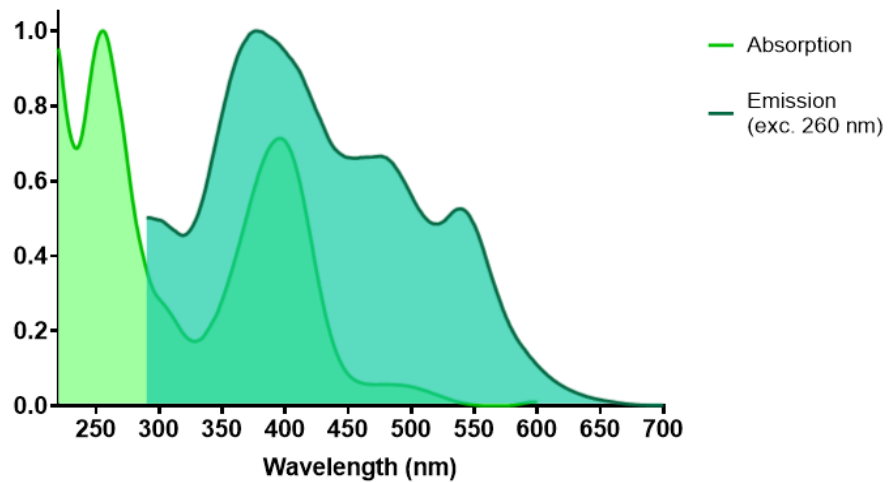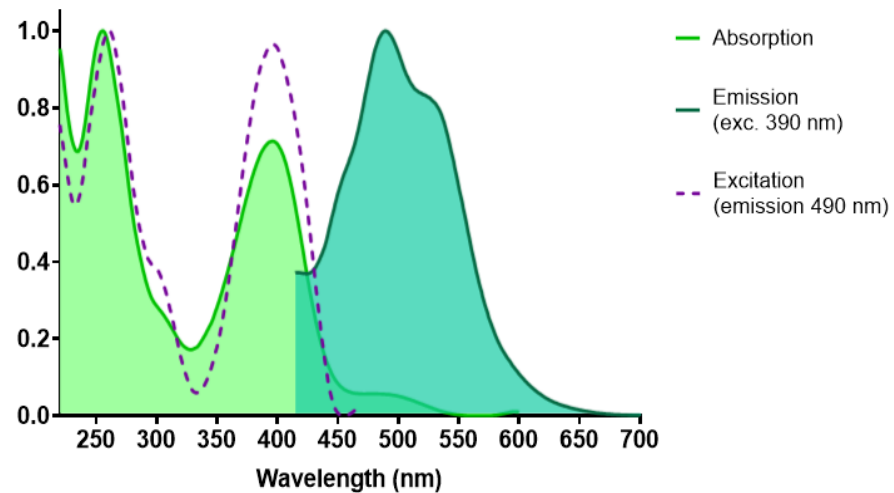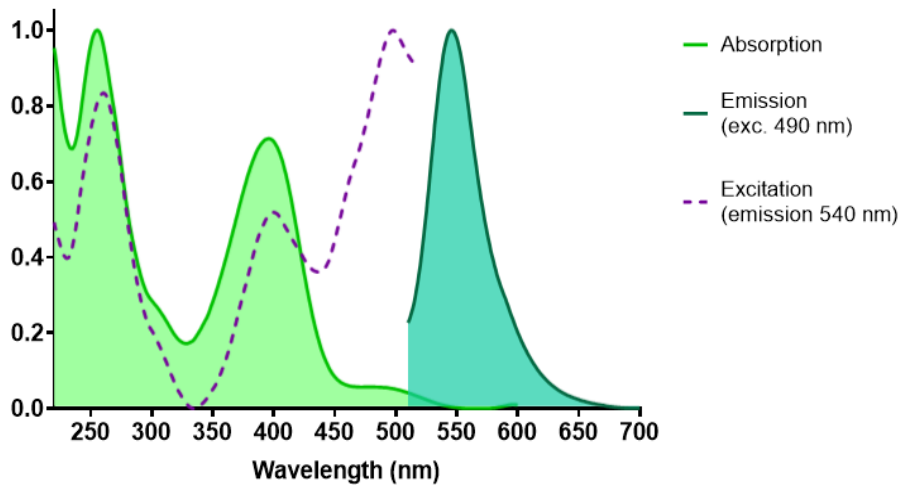

TMGpppA-2'-O-C(O)NH-CH<sub>2</sub>CH<sub>2</sub>-triazole-CH<sub>2</sub>-DMHBI (**4a-2'**)

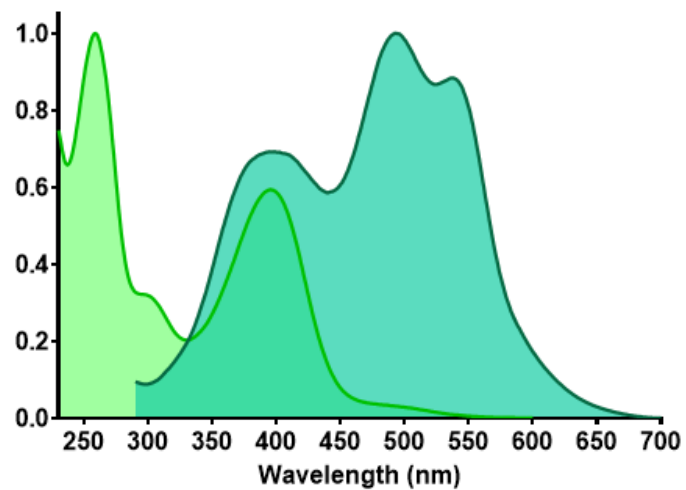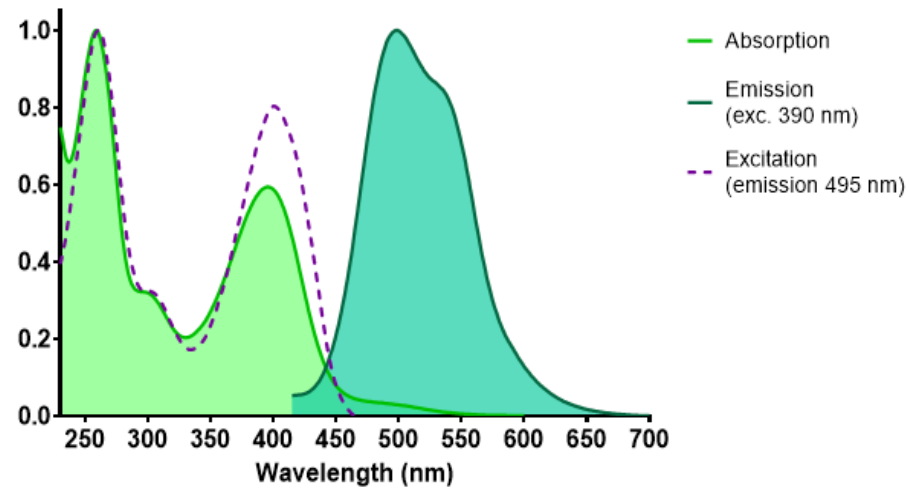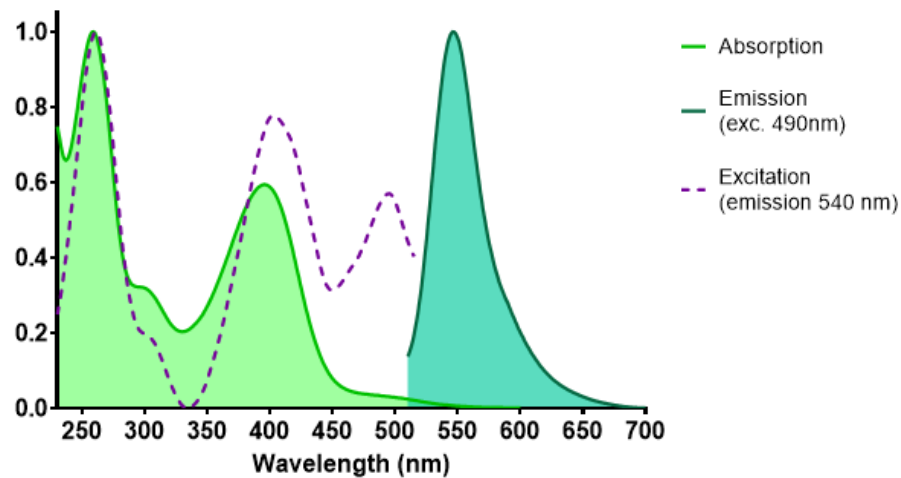

TMGpppA-3'-O-C(O)NH-CH<sub>2</sub>CH<sub>2</sub>-triazole-CH<sub>2</sub>-DMHBI (4a-3')

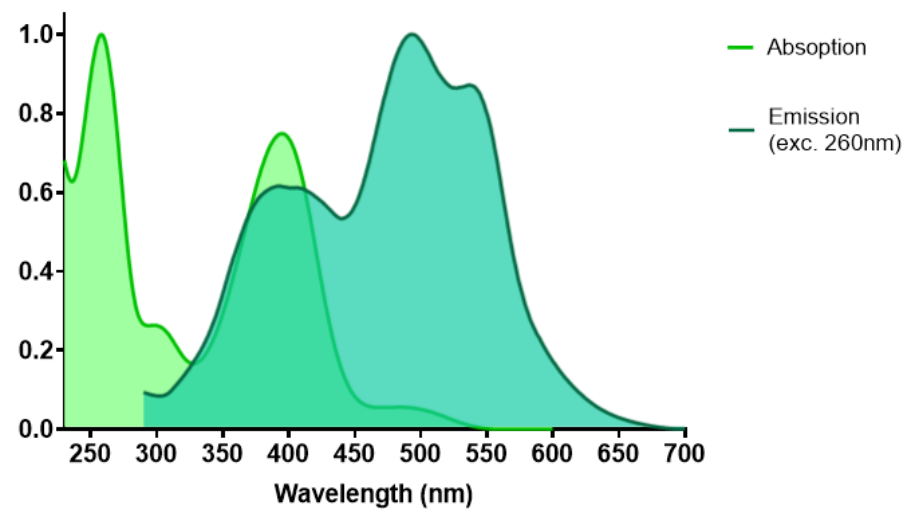

DODAJ

TMGppppG-3'-O-C(O)NH-CH<sub>2</sub>CH<sub>2</sub>-triazole-CH<sub>2</sub>-DMHBI (5a-3')

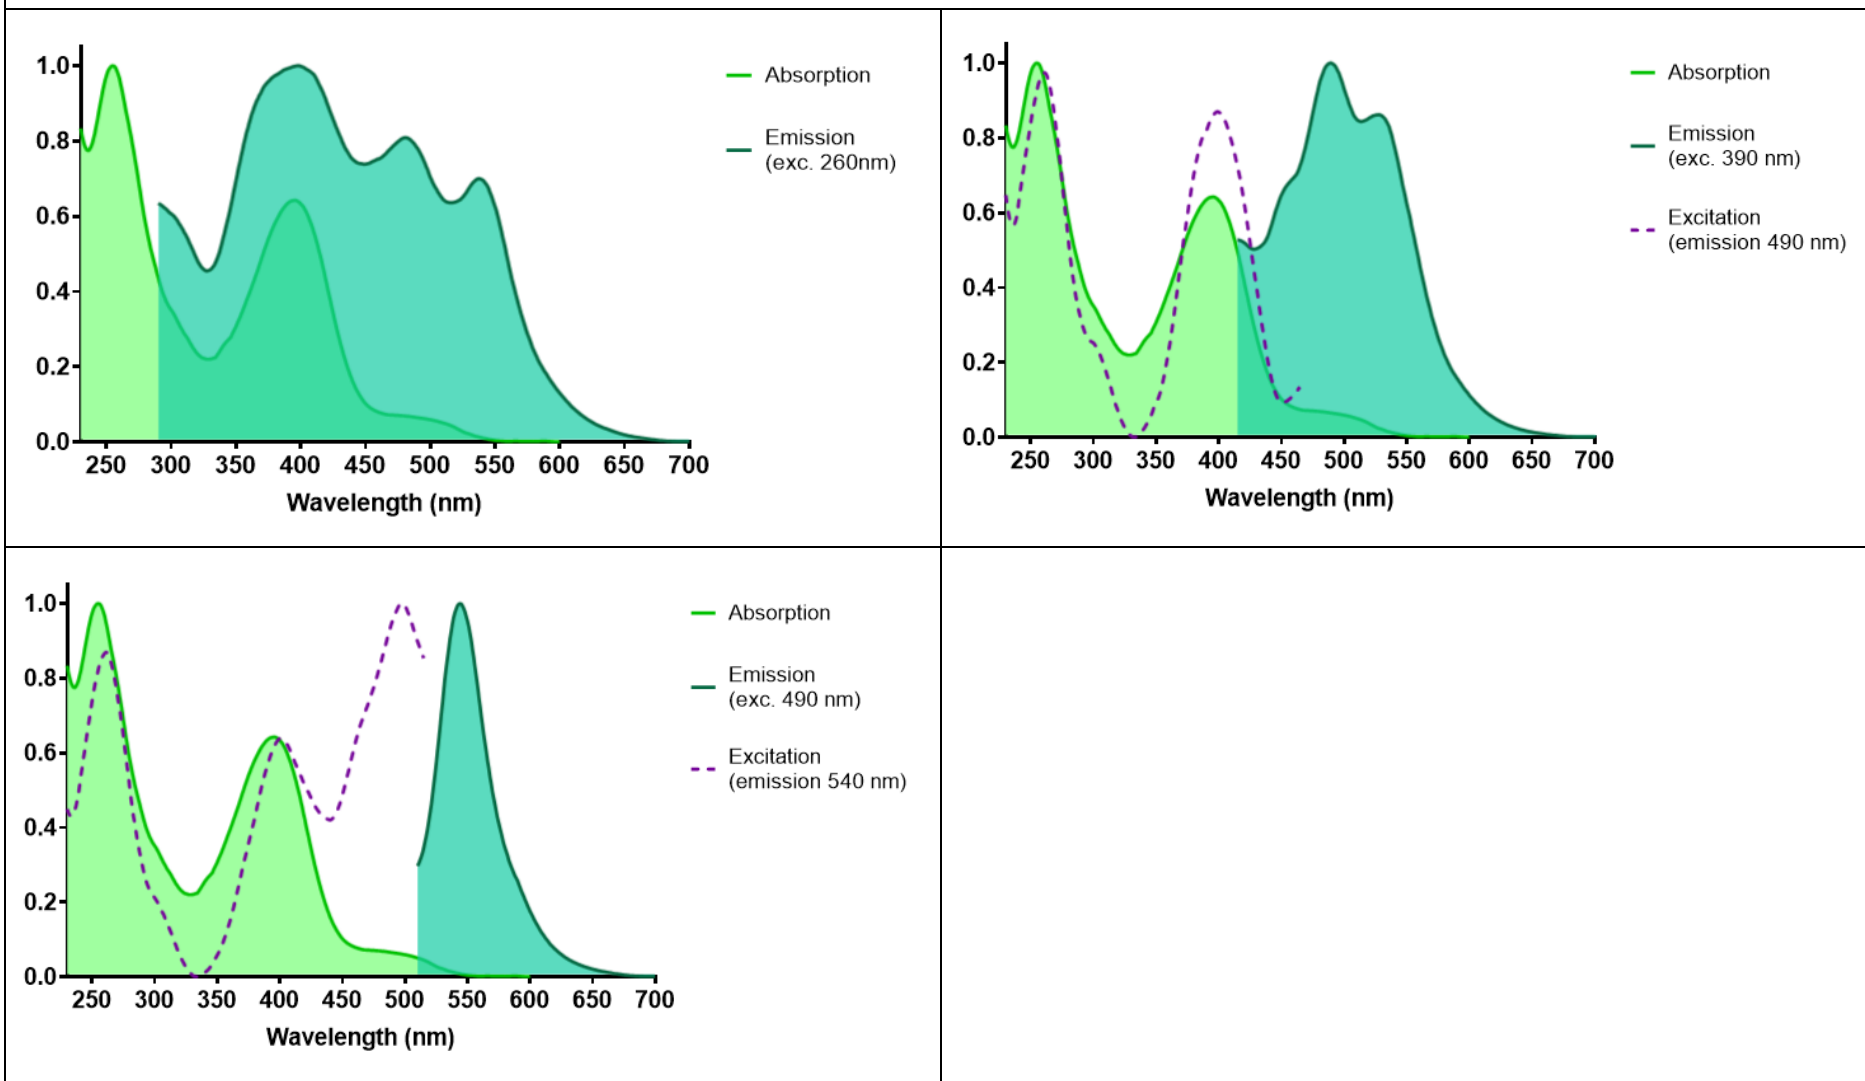

TMGpppA-2'+3'-O-C(O)NH-CH<sub>2</sub>CH<sub>2</sub>-triazole-CH<sub>2</sub>-DMHBI (6a)

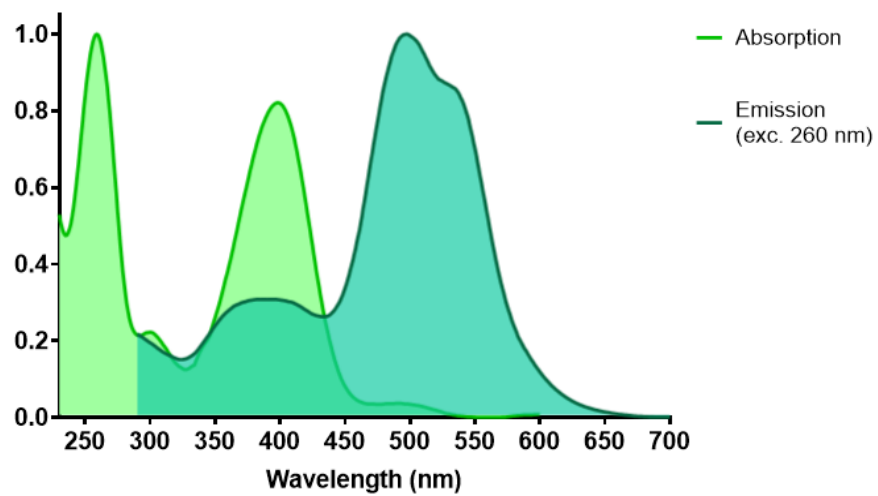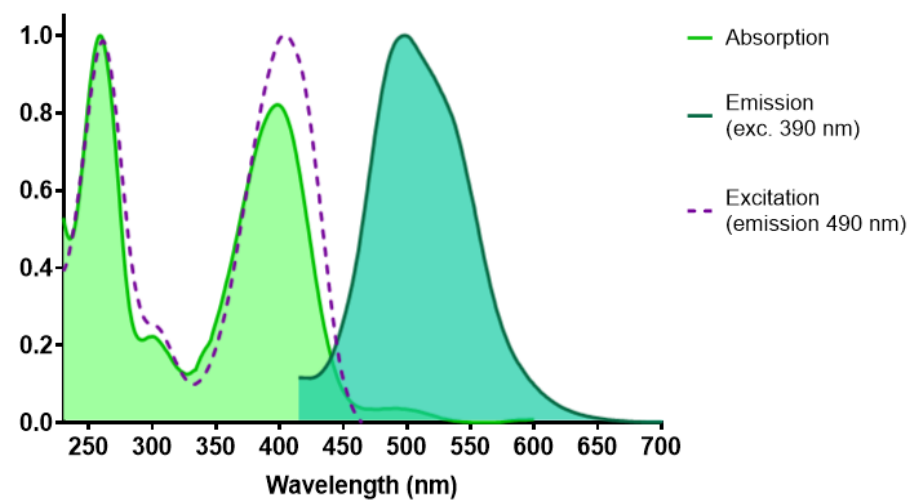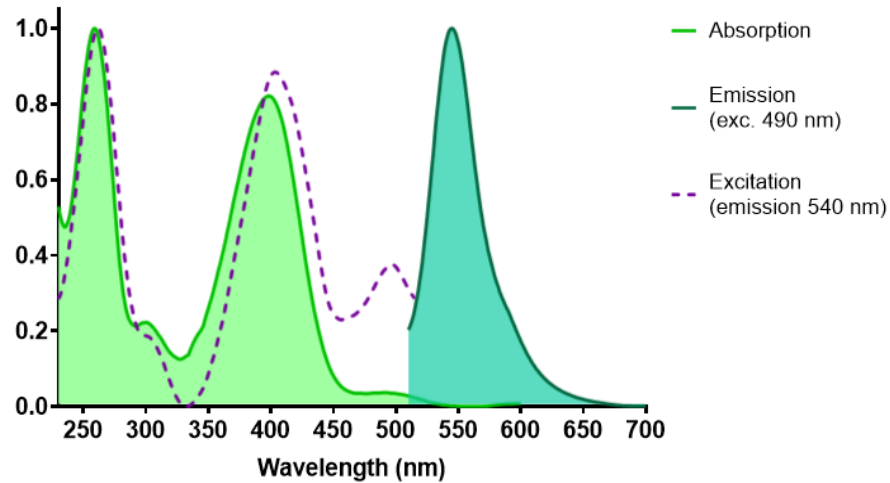

TMGppp-5'-SG-2'-O-C(O)NH-CH<sub>2</sub>-triazole-CH<sub>2</sub>CH<sub>2</sub>-DMHBI (7a-2')

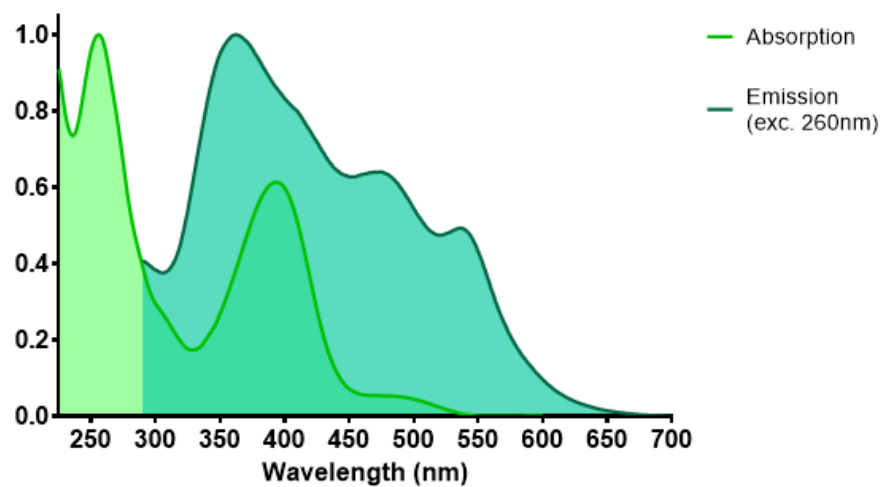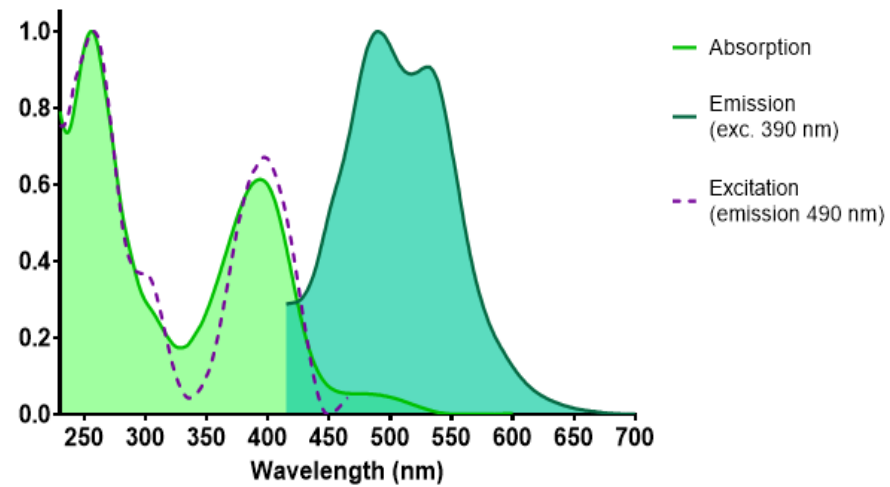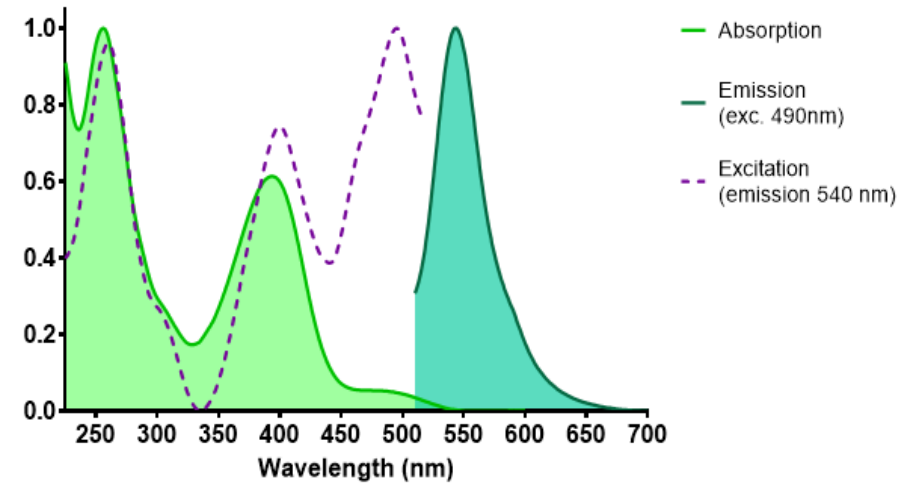

TMGppp-5'-SG-3'-O-C(O)NH-CH<sub>2</sub>-triazole-CH<sub>2</sub>CH<sub>2</sub>-DMHBI (7a-3')

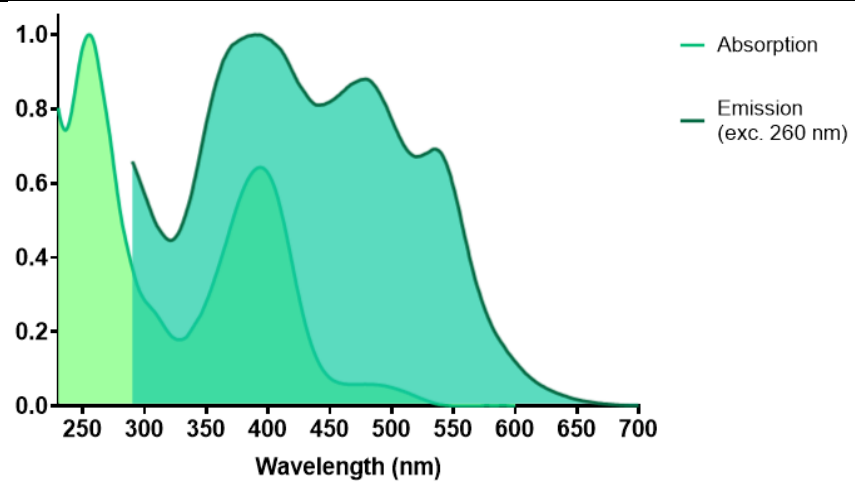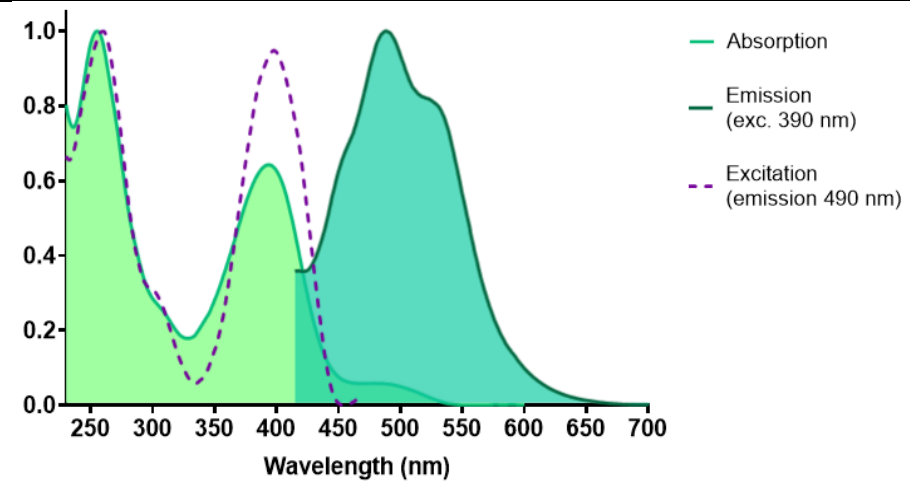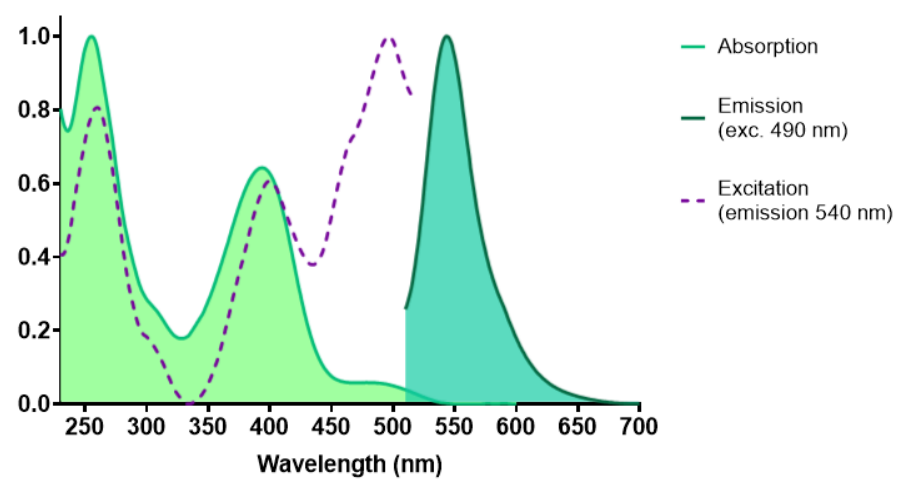



TMGpppG-N1-CH<sub>2</sub>-triazole-CH<sub>2</sub>CH<sub>2</sub>-DMHBI (8a)

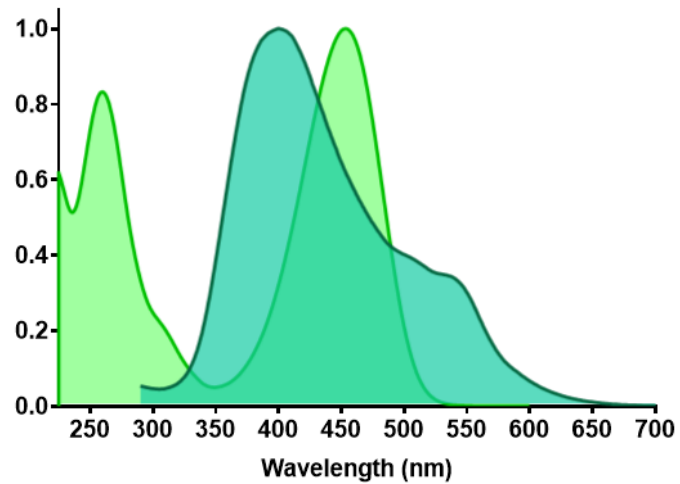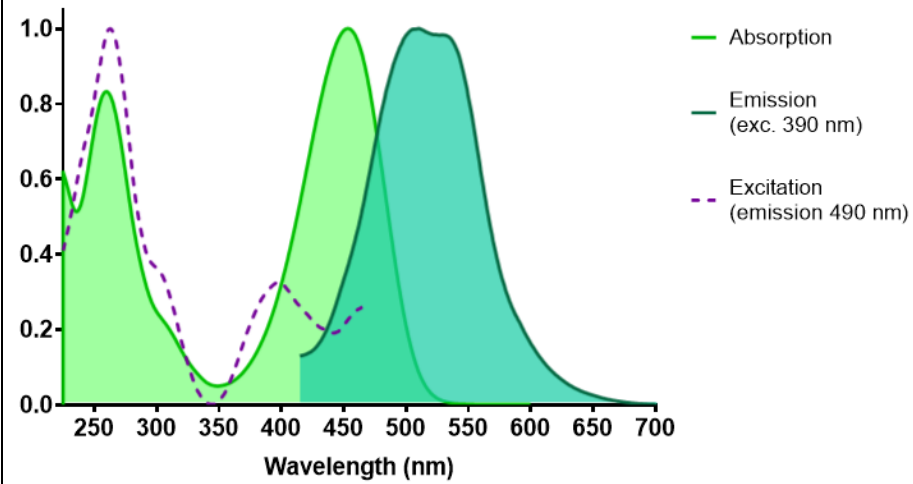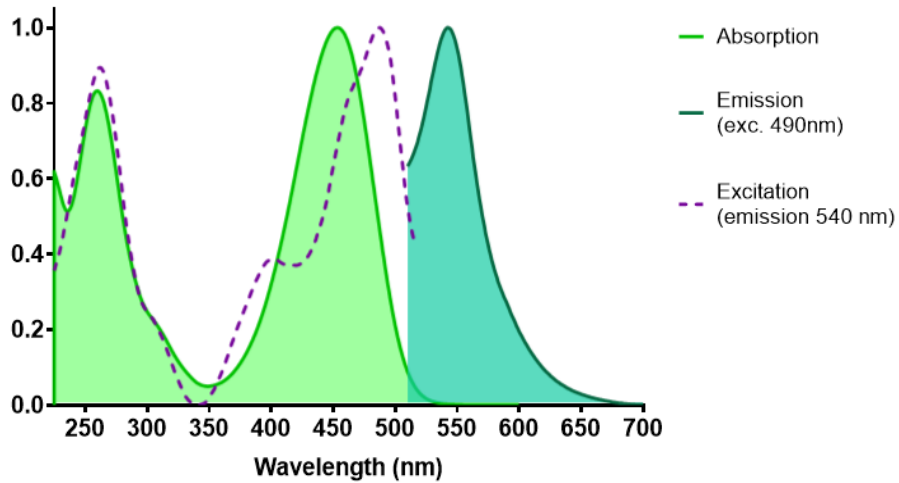

TMG(-2'-O-C(O)NH-CH<sub>2</sub>CH<sub>2</sub>-triazole-CH<sub>2</sub>-DMHBI)pppG (9a-2')

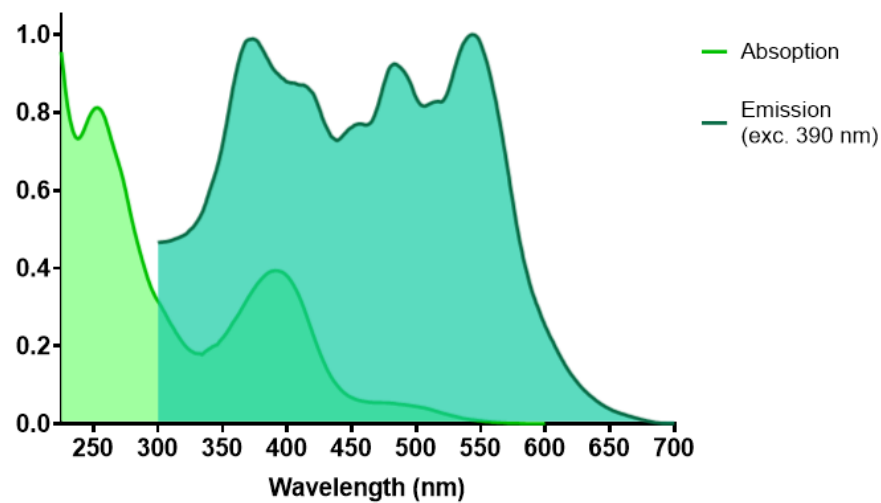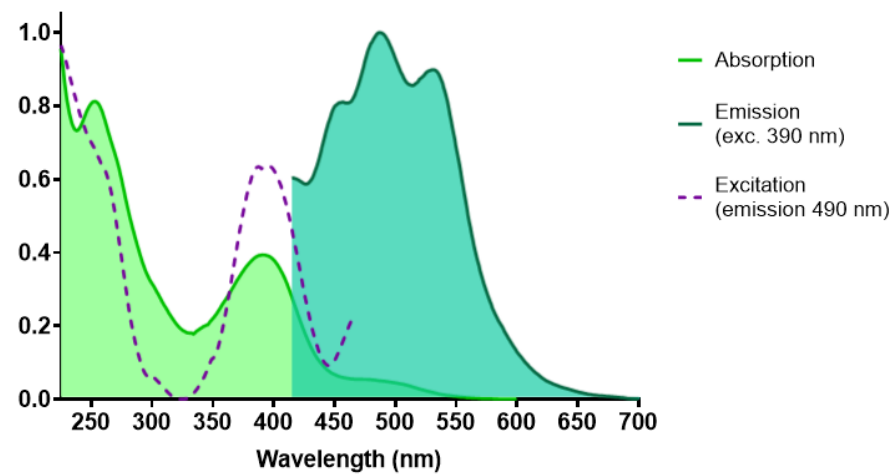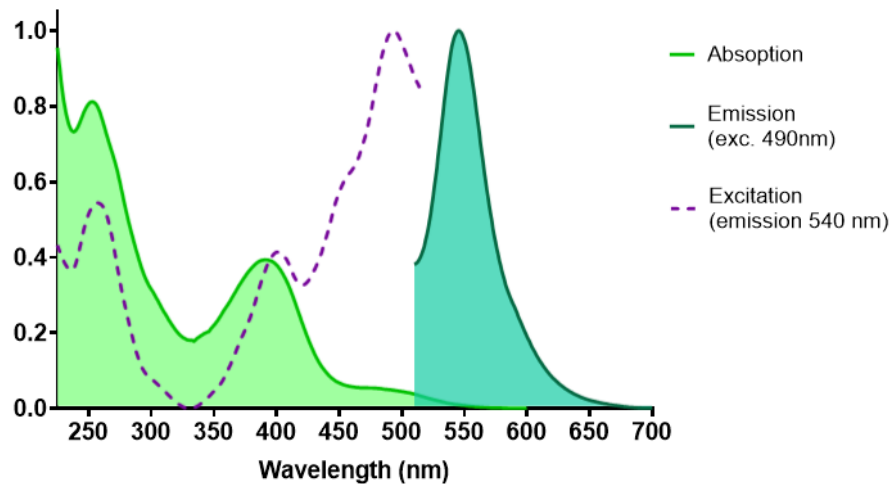

TMG(-3'-O-C(O)NH-CH<sub>2</sub>CH<sub>2</sub>-triazole-CH<sub>2</sub>-DMHBI)pppG (9a-3')

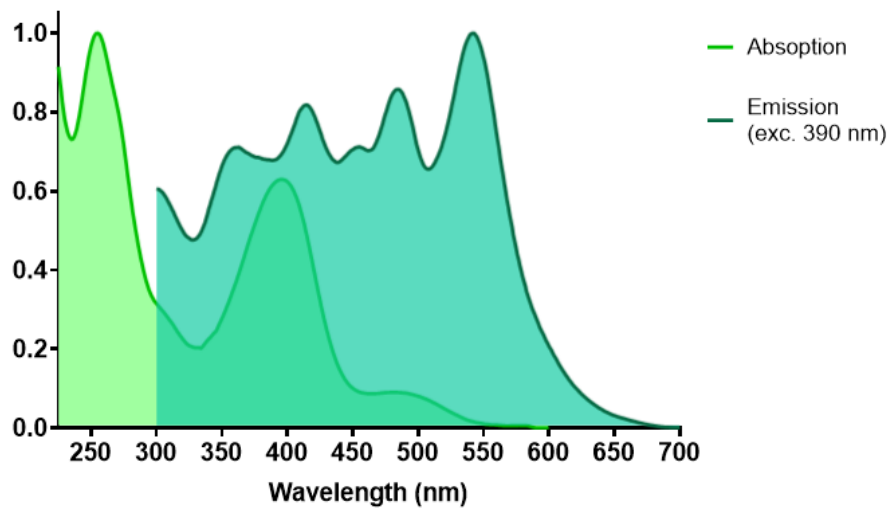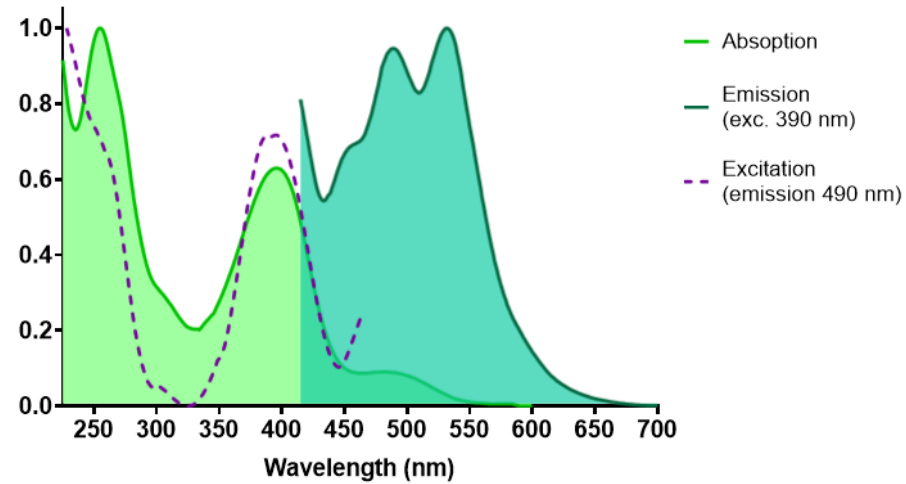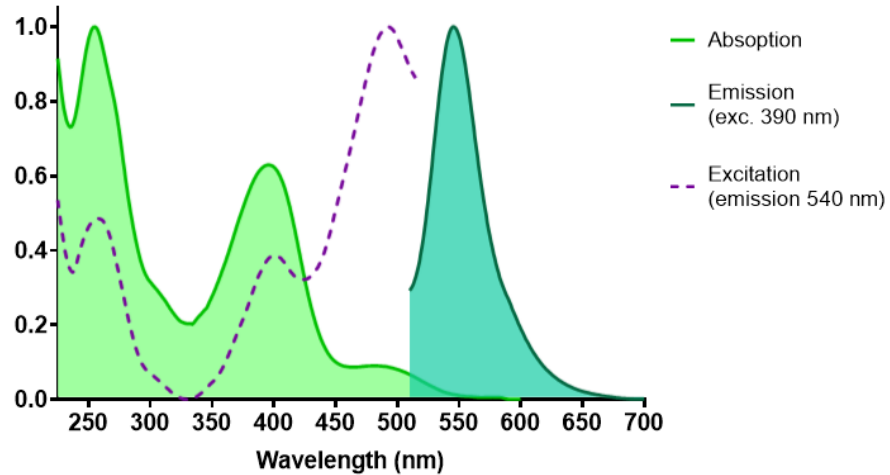

GMP-2'-O-C(O)NH-CH<sub>2</sub>CH<sub>2</sub>-triazole-CH<sub>2</sub>-DMHBI (**10a-2'**)

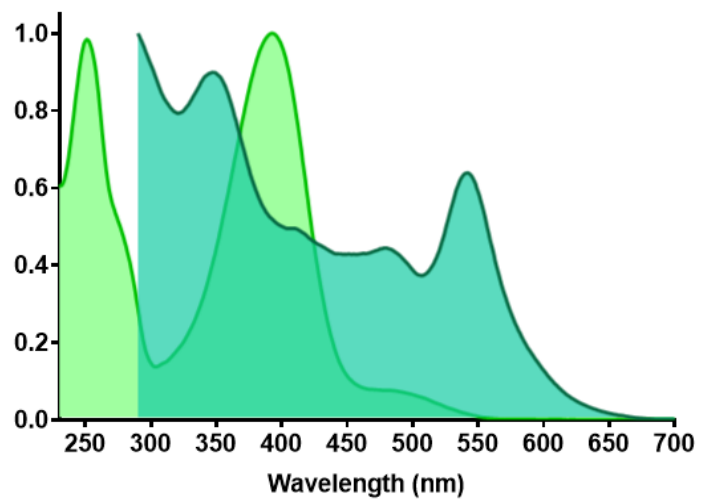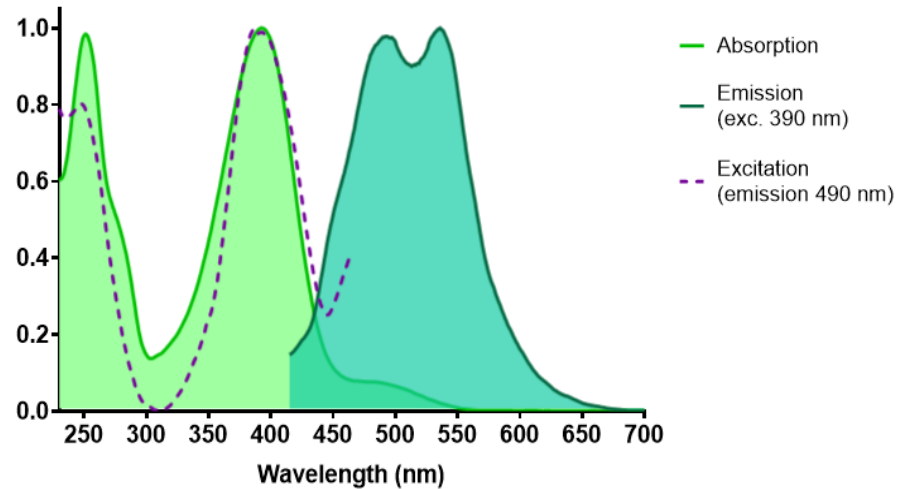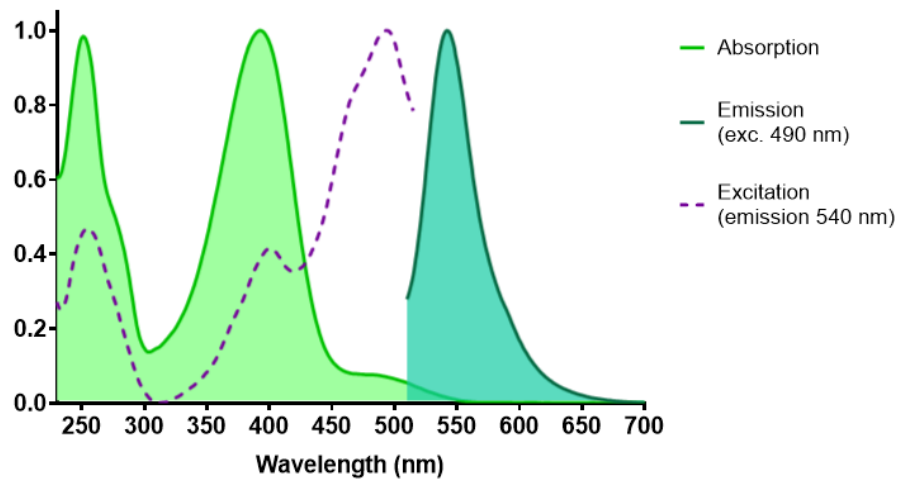

GMP-3'-O-C(O)NH-CH<sub>2</sub>CH<sub>2</sub>-triazole-CH<sub>2</sub>-DMHBI (**10a-3'**)

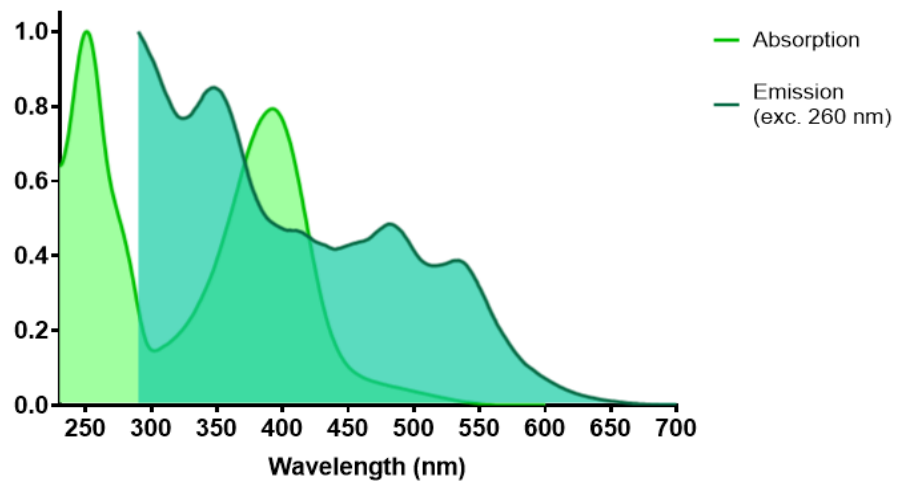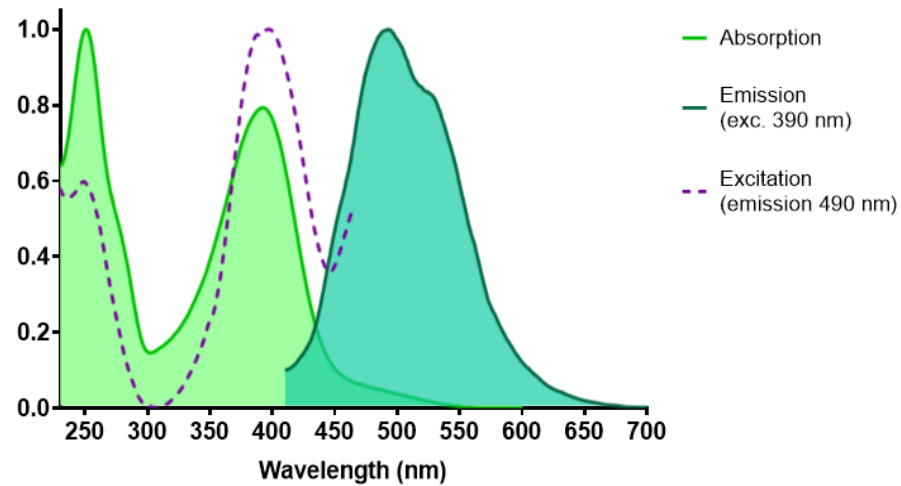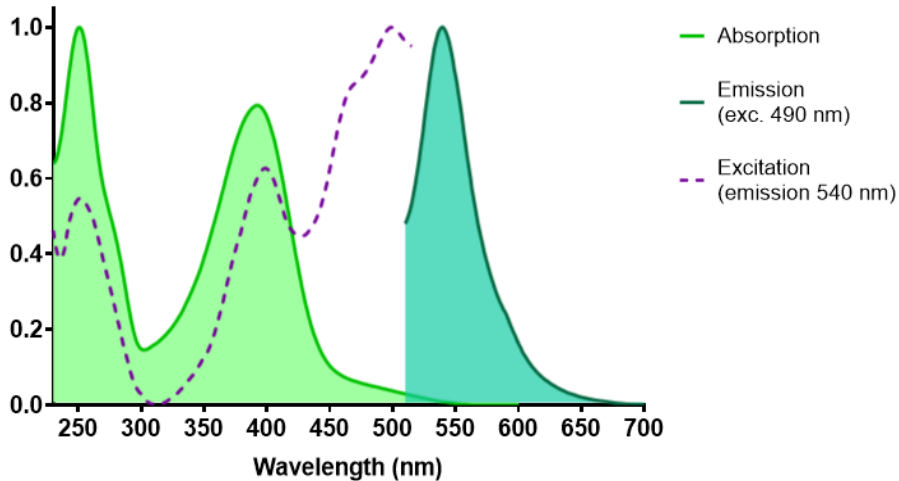

DMHBI-CH<sub>2</sub>-triazole-CH<sub>2</sub>-phosphonate (12a)

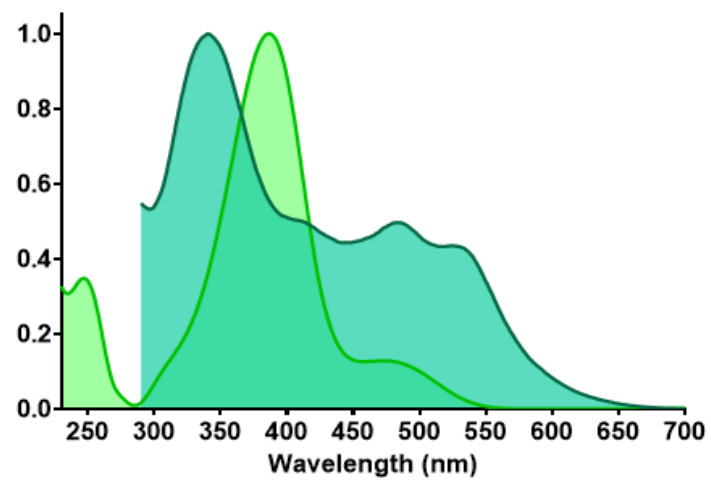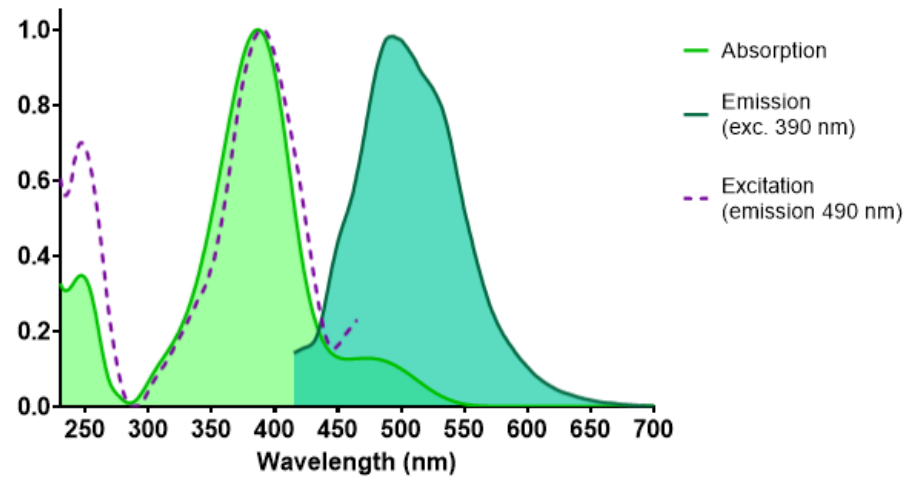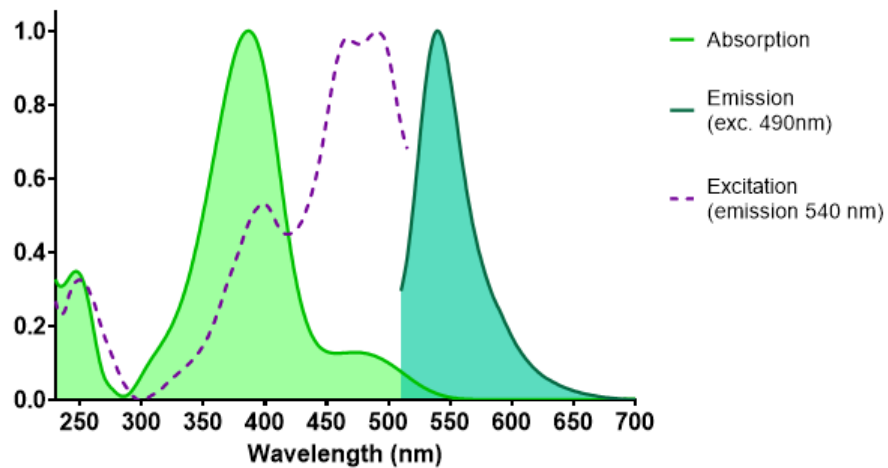

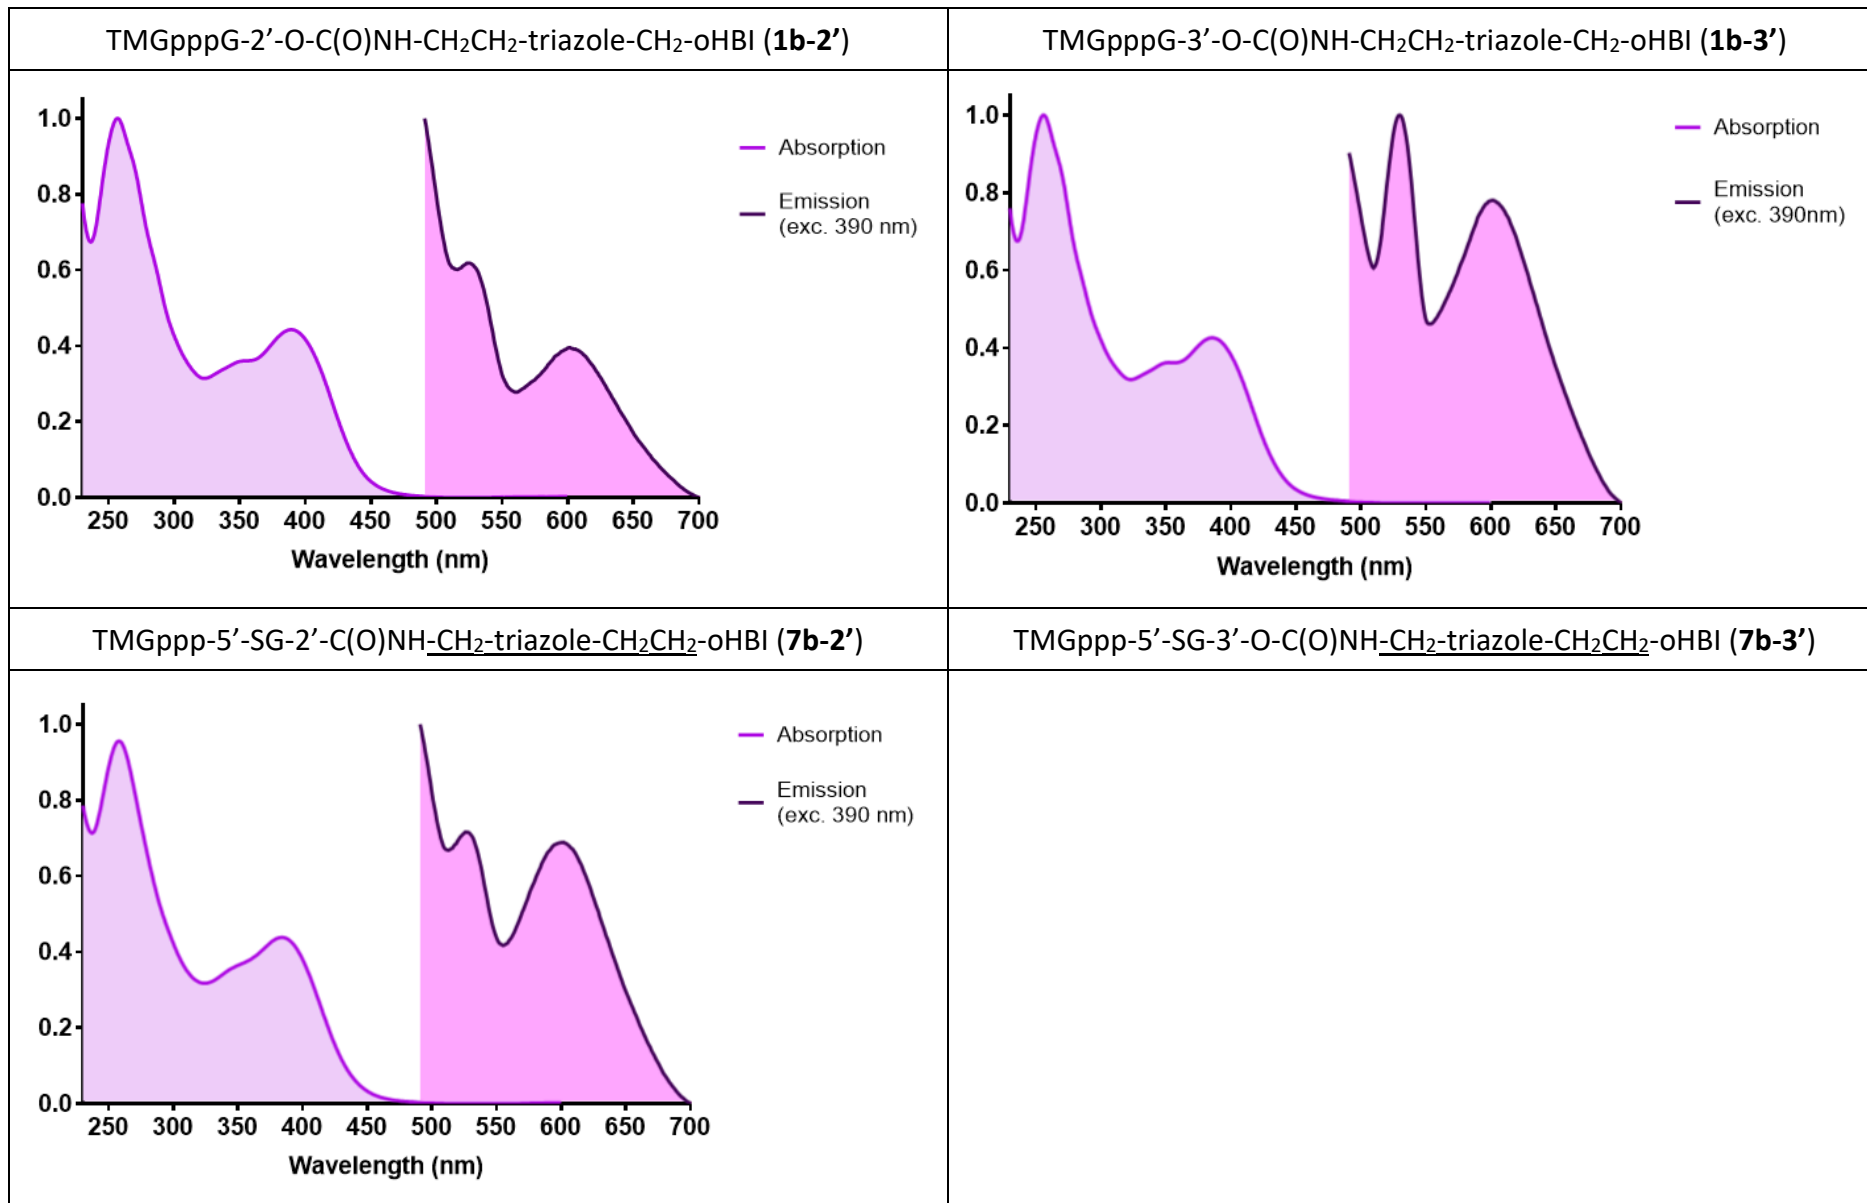

TMGpppG-N1-CH<sub>2</sub>-triazole-CH<sub>2</sub>CH<sub>2</sub>-oHBI (**8b**)

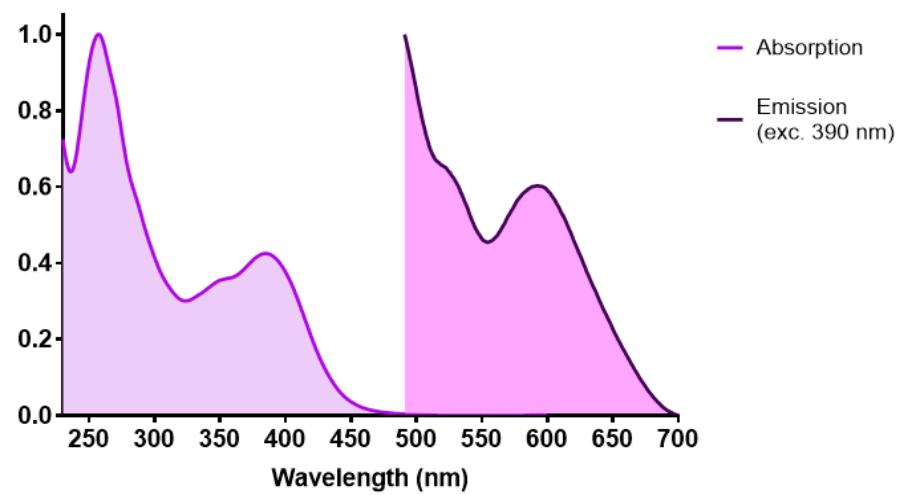



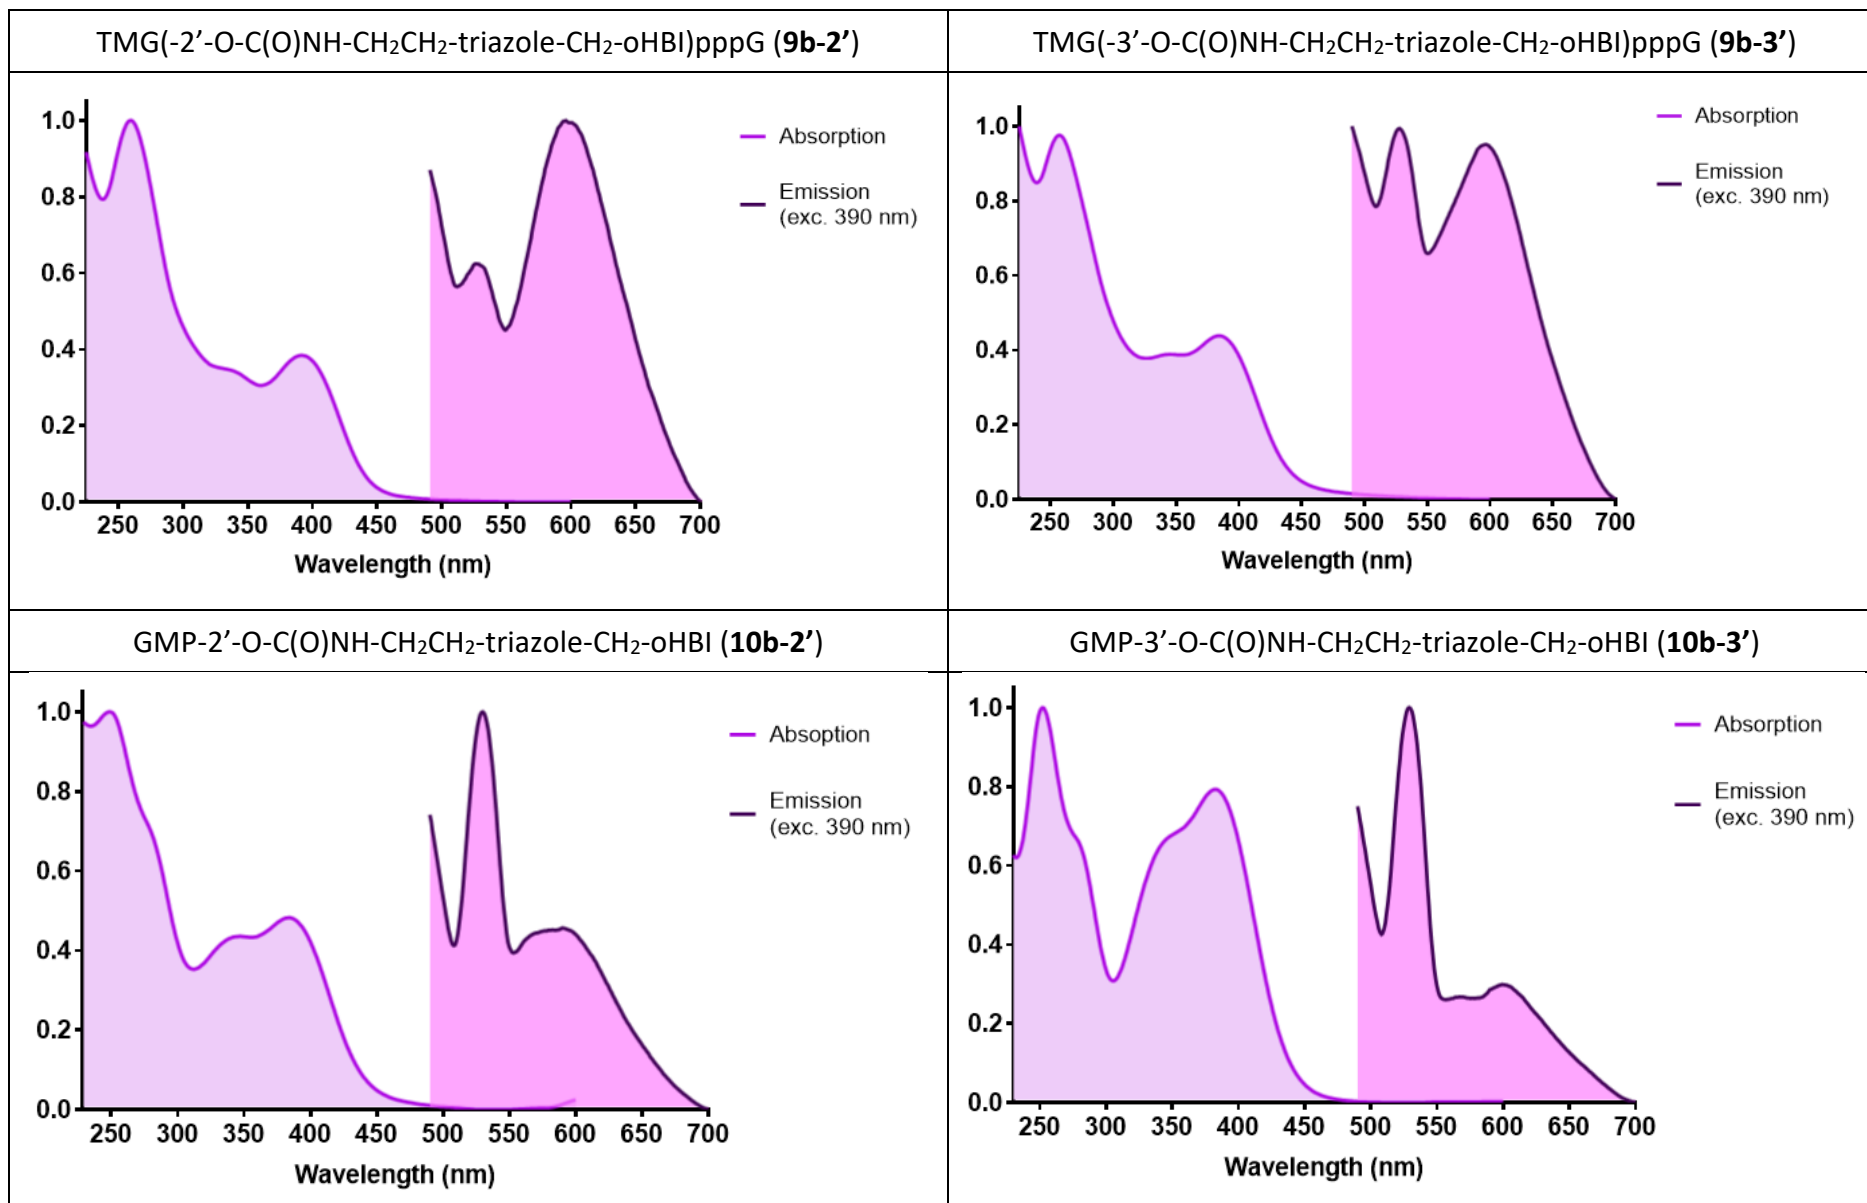

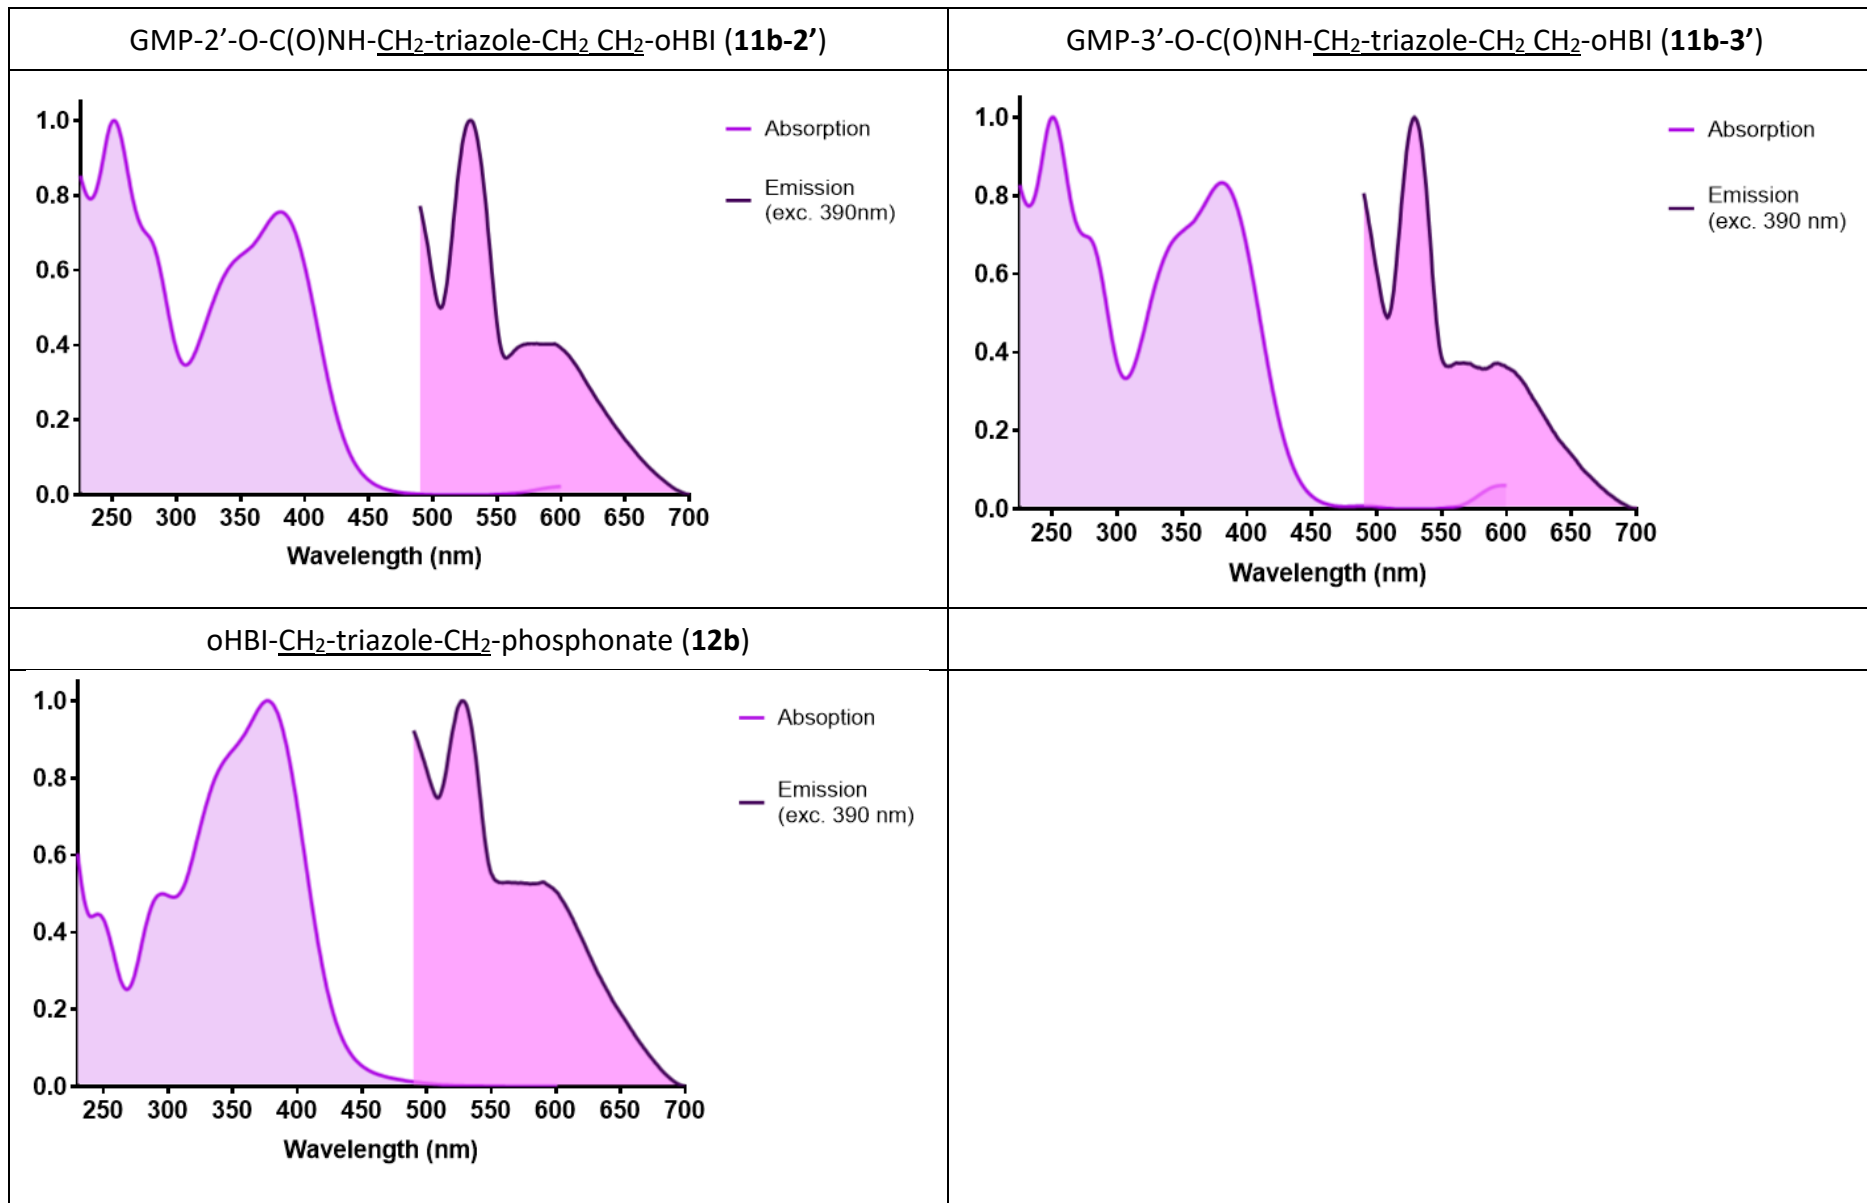

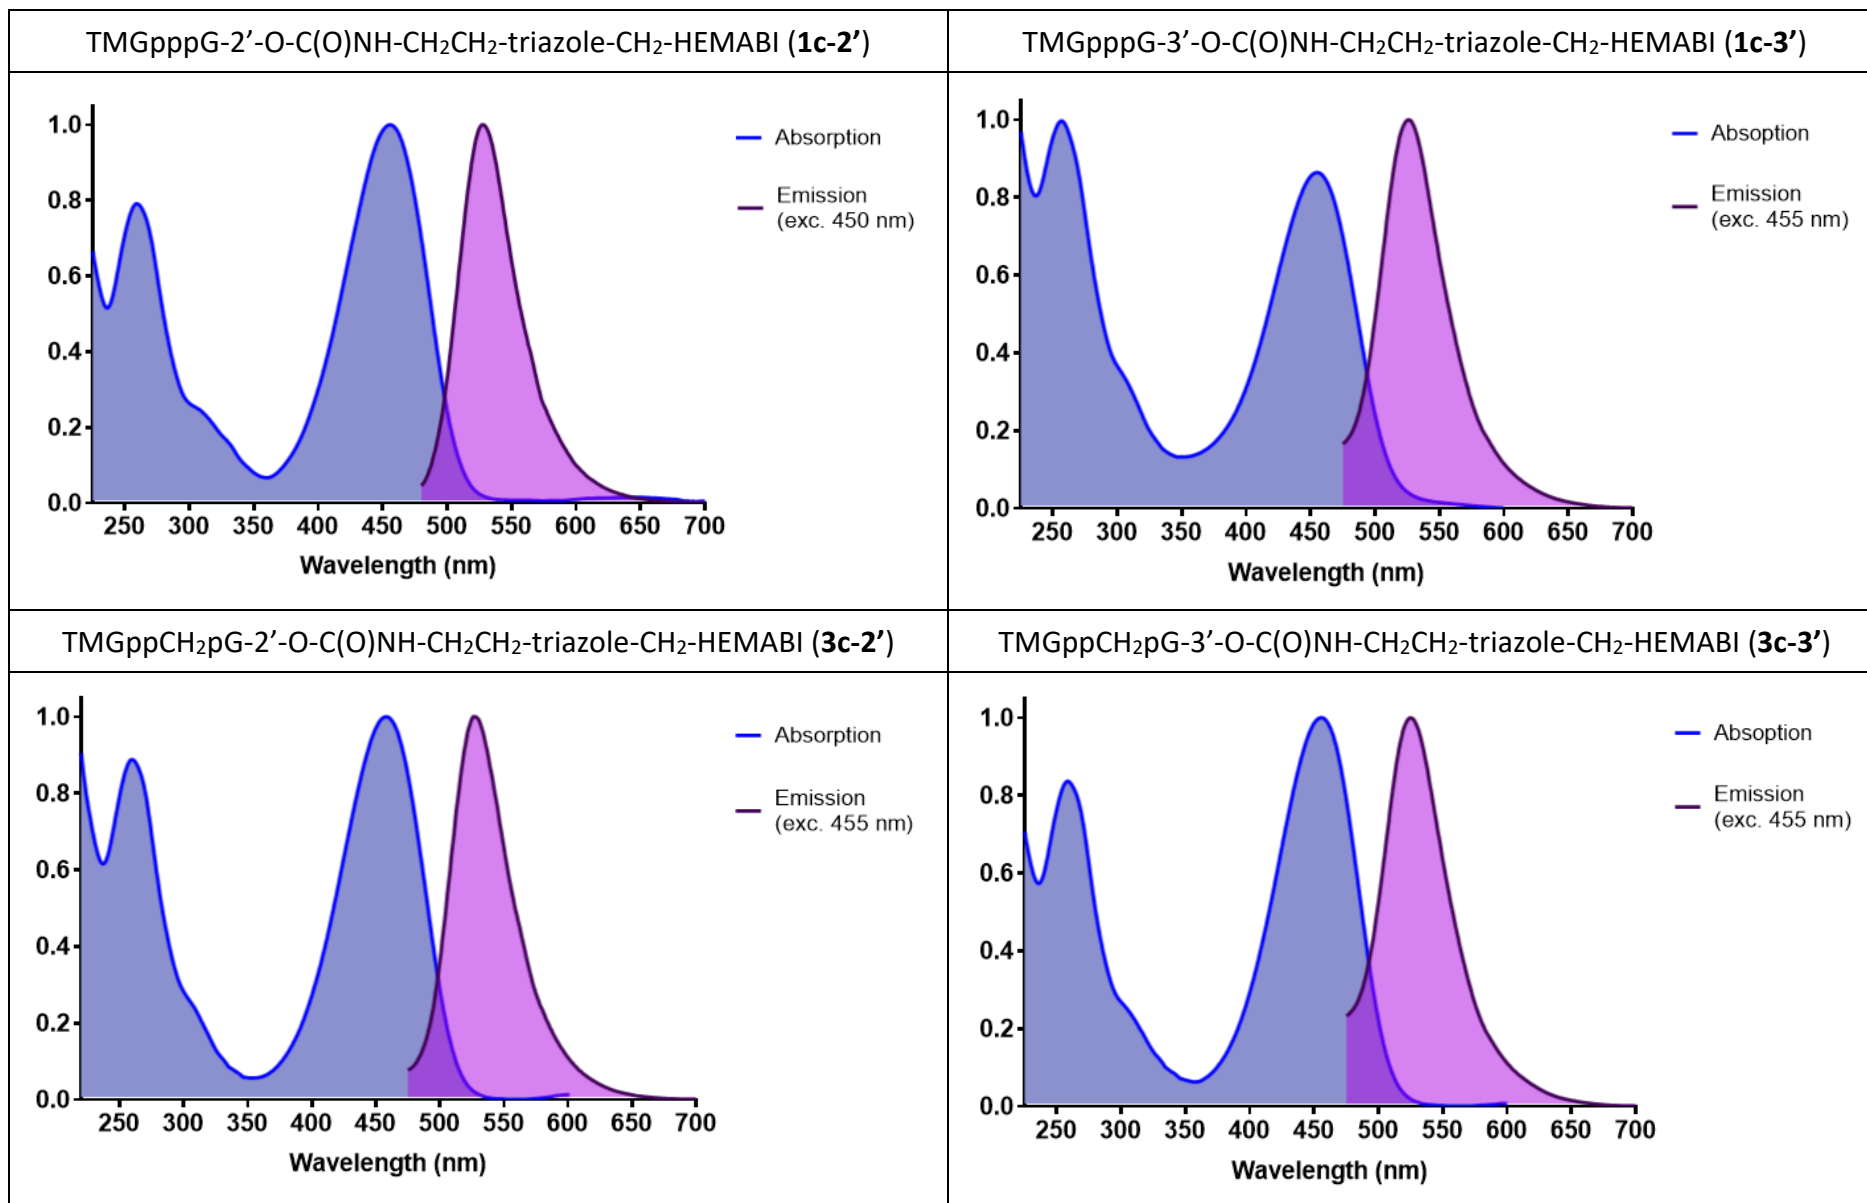

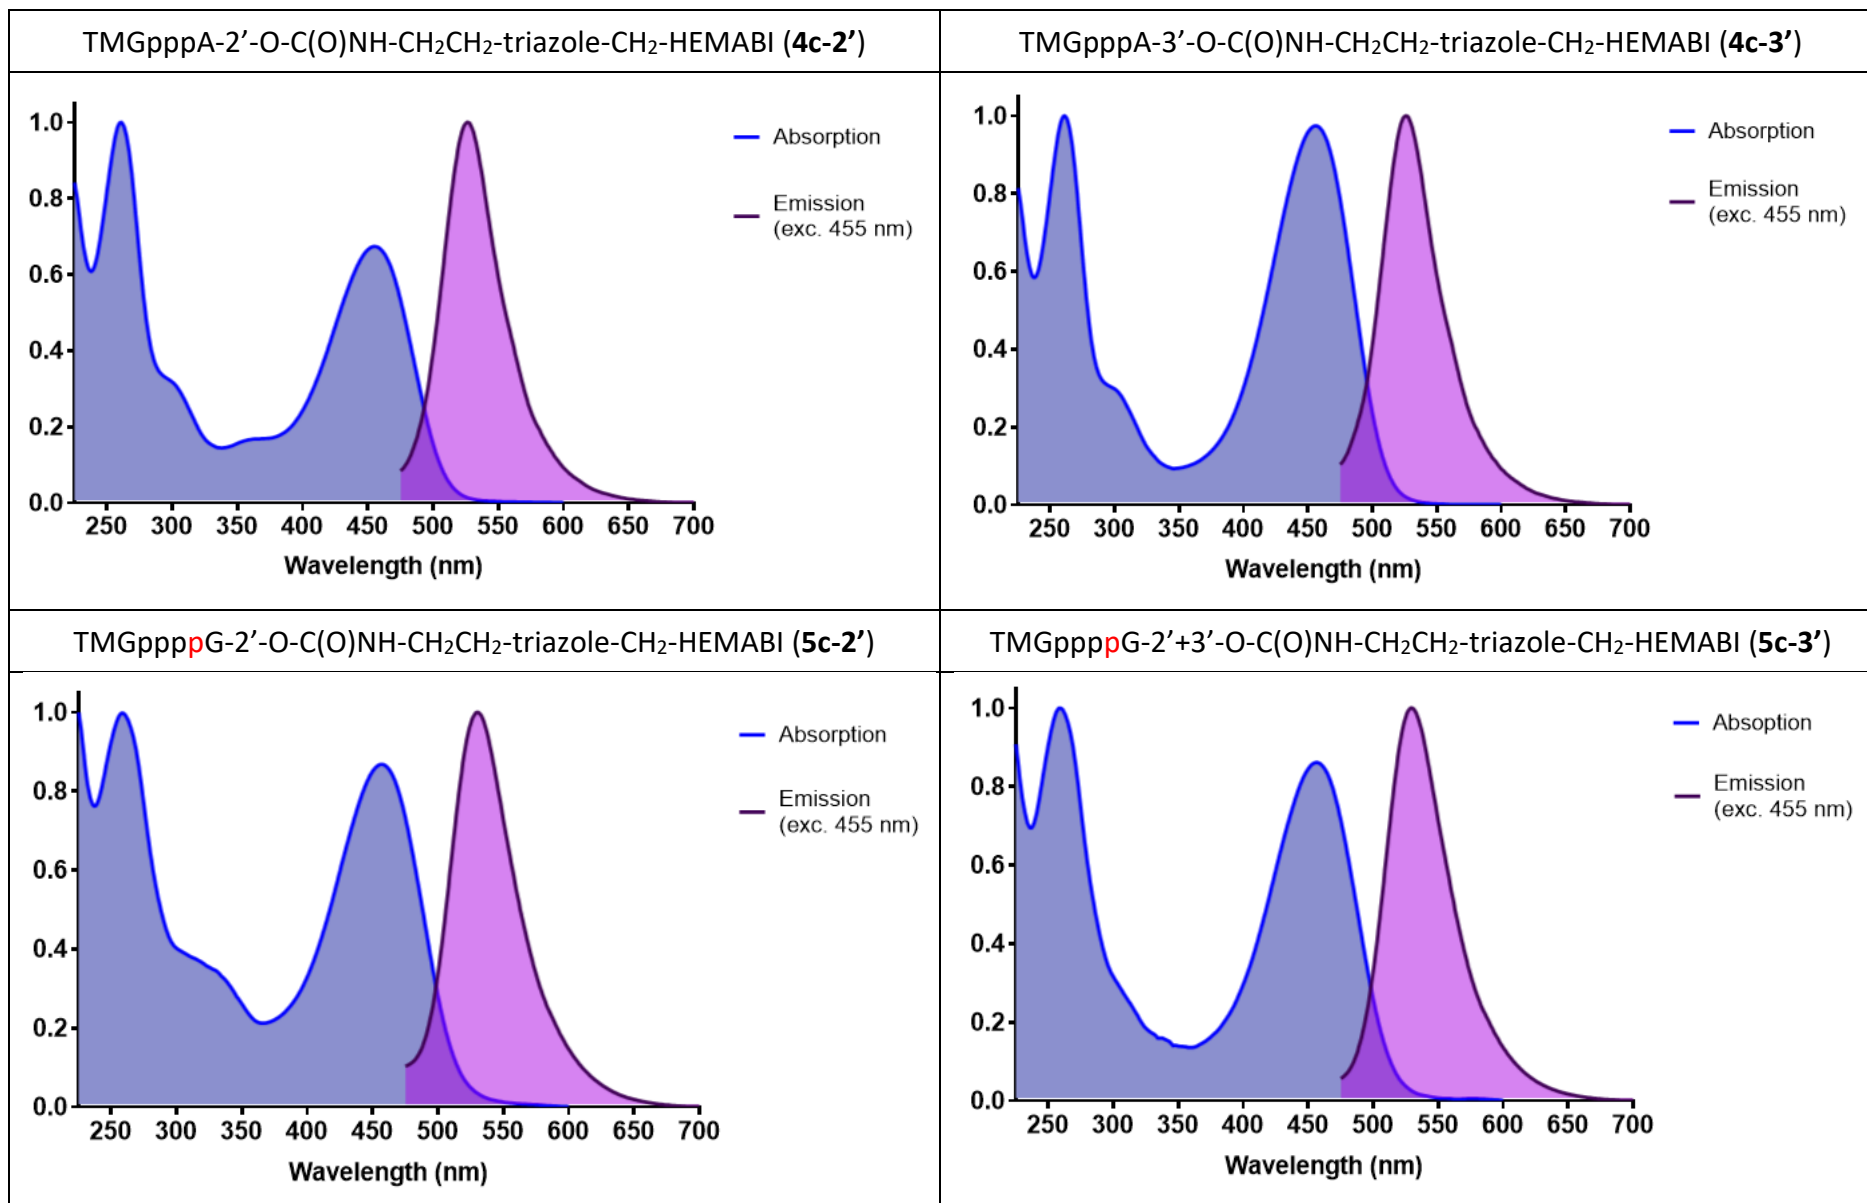

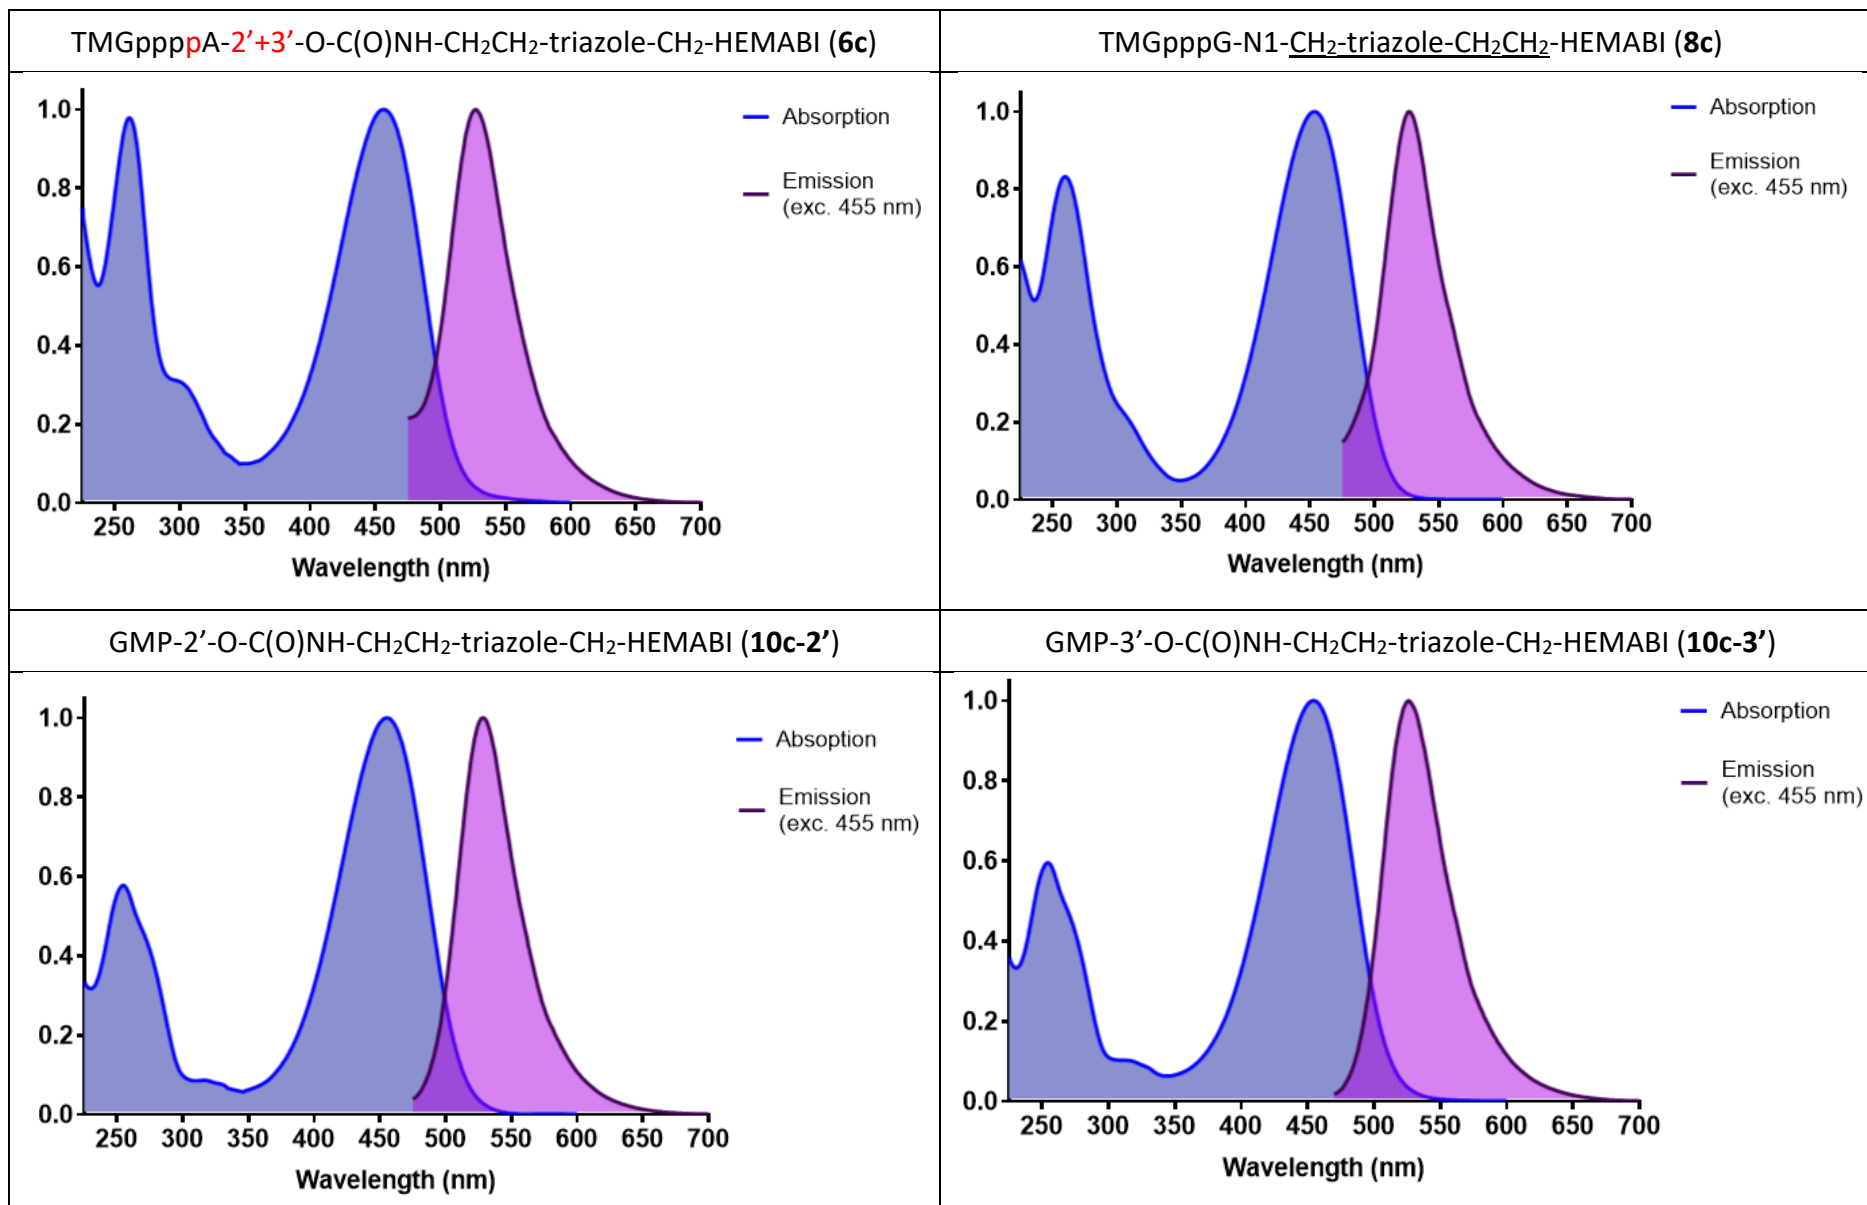

HEMABI-CH<sub>2</sub>-triazole-CH<sub>2</sub>-phosphonate (**12c**)

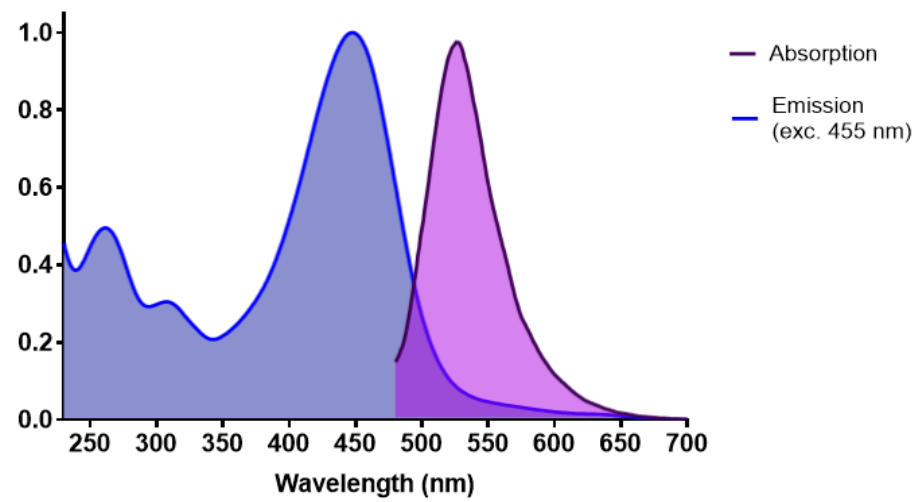

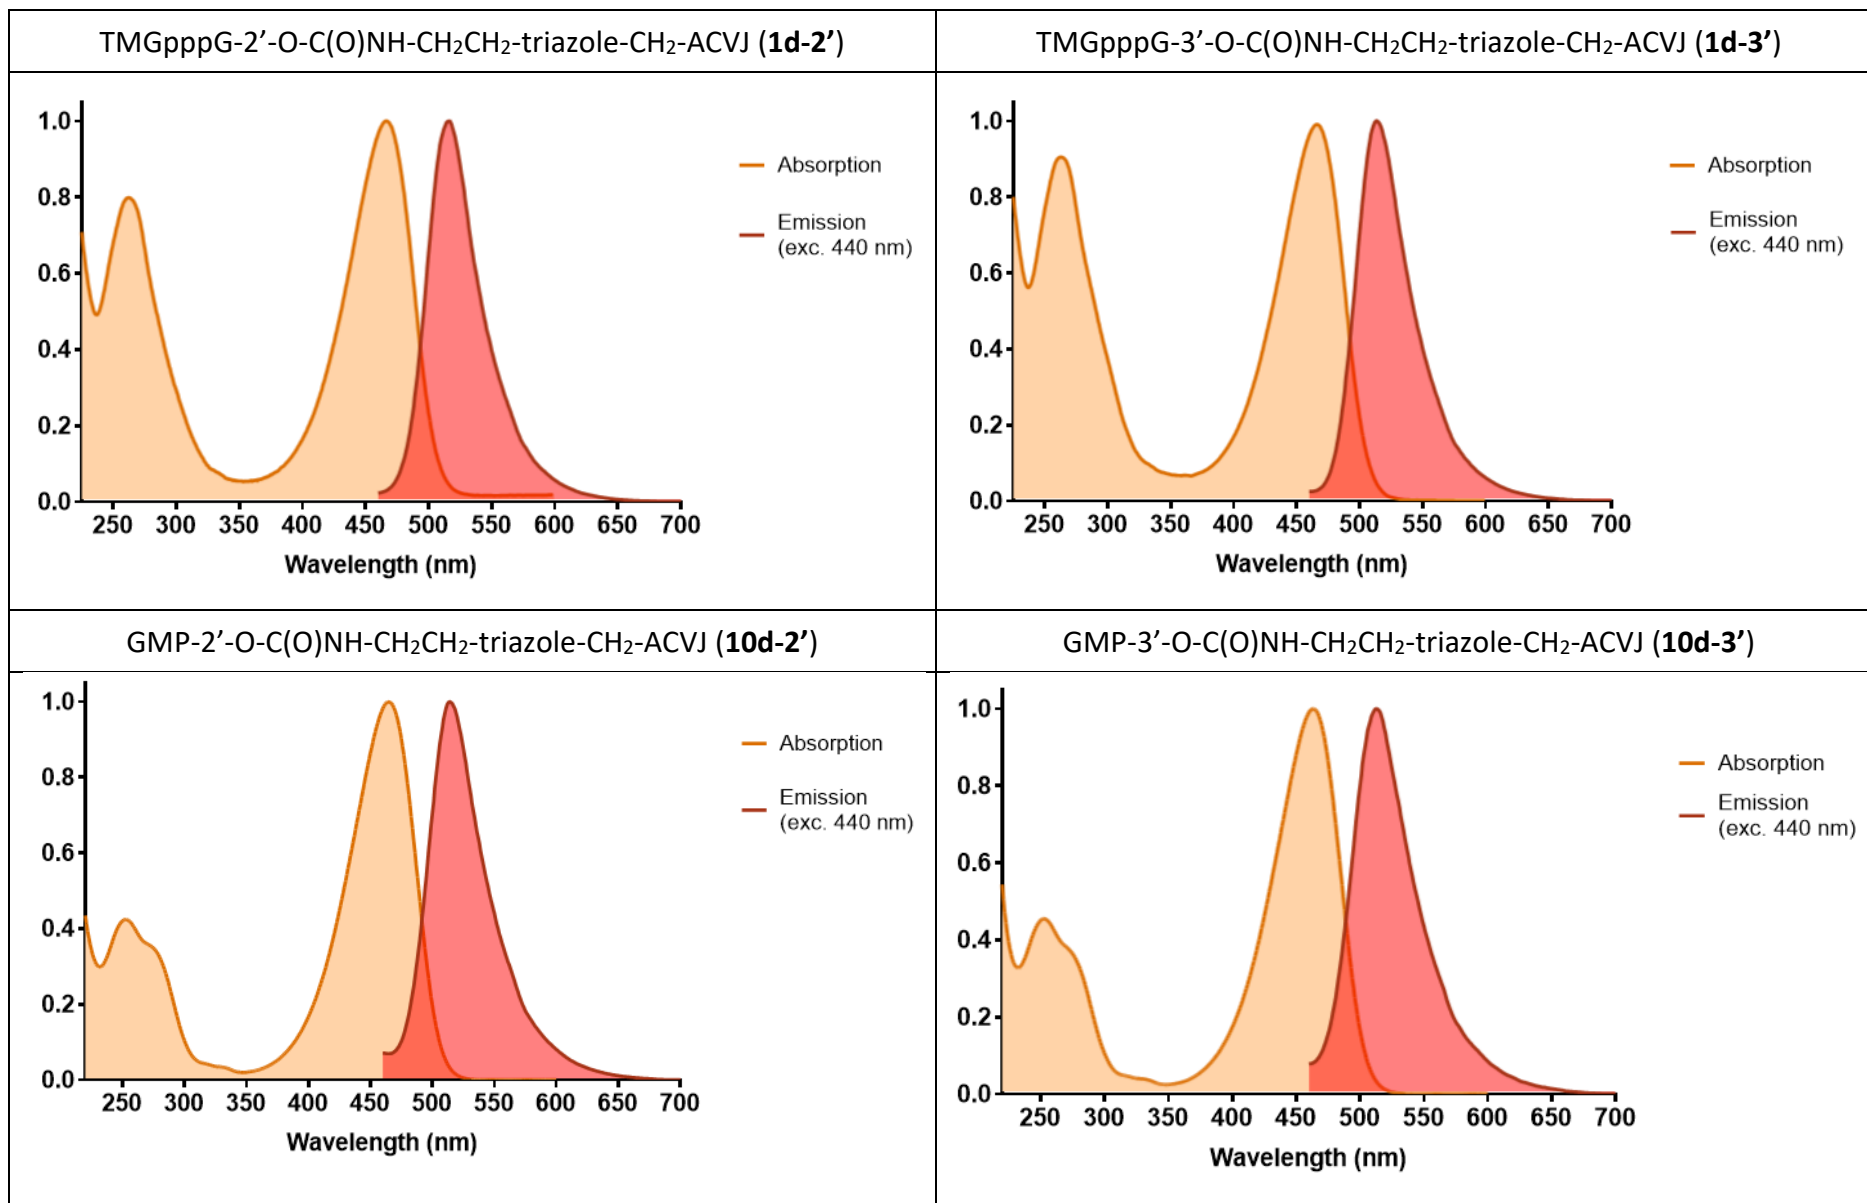

ACVJ-CH<sub>2</sub>-triazole-CH<sub>2</sub>-phosphonate (**12d**)

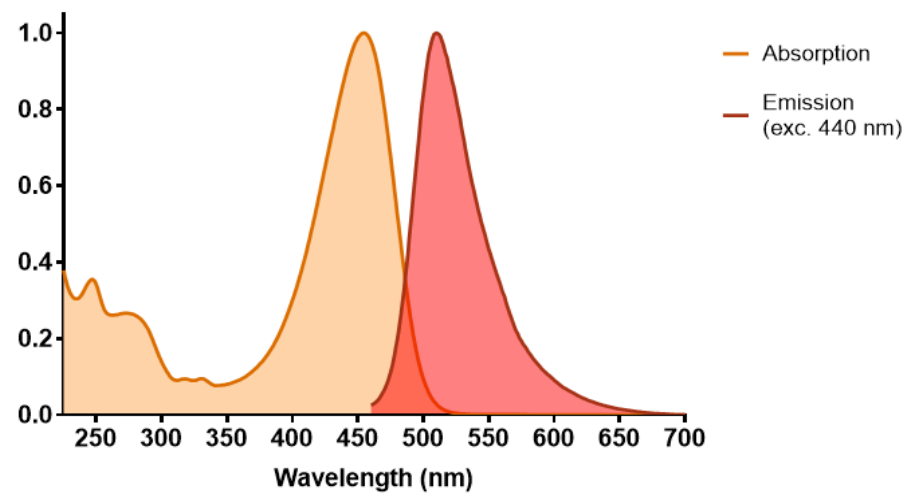

Supplement: d4ob01019a1.pdf [file d4ob01019a1.pdf]
